# Supplementary material for: Identification of miRNAs and their targets using high-throughput sequencing and degradome analysis in cytoplasmic male-sterile and its maintainer fertile lines of brassica juncea
Source: PubMed Central journal article supplement (PMC3553062; doi:10.1186/1471-2164-14-9), 2013-01-16

## Secondary structure prediction of candidate pre-microRNAs based on Table S10

### Pre-miRNA 1

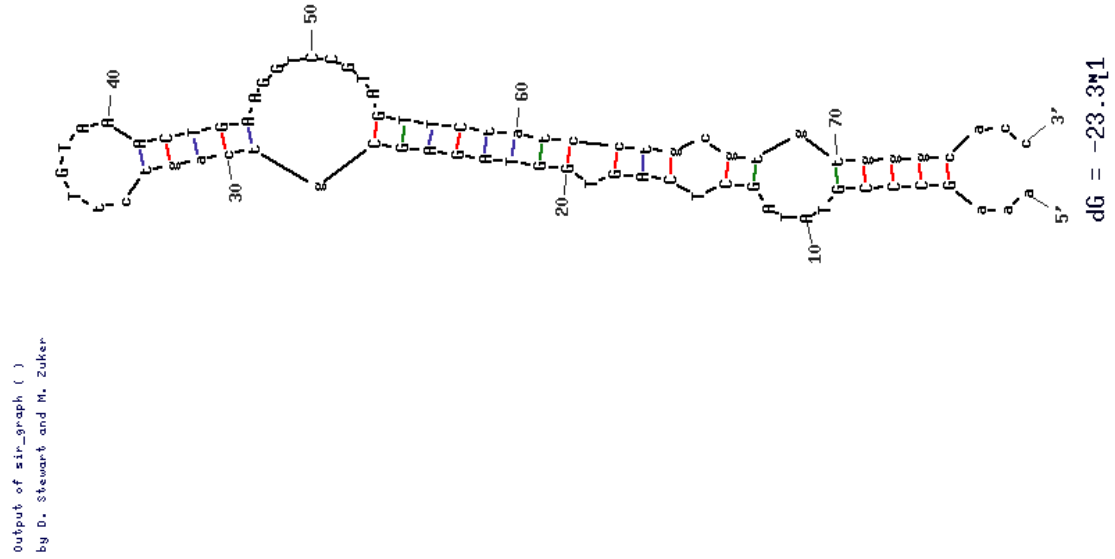

### Pre-miRNA 2

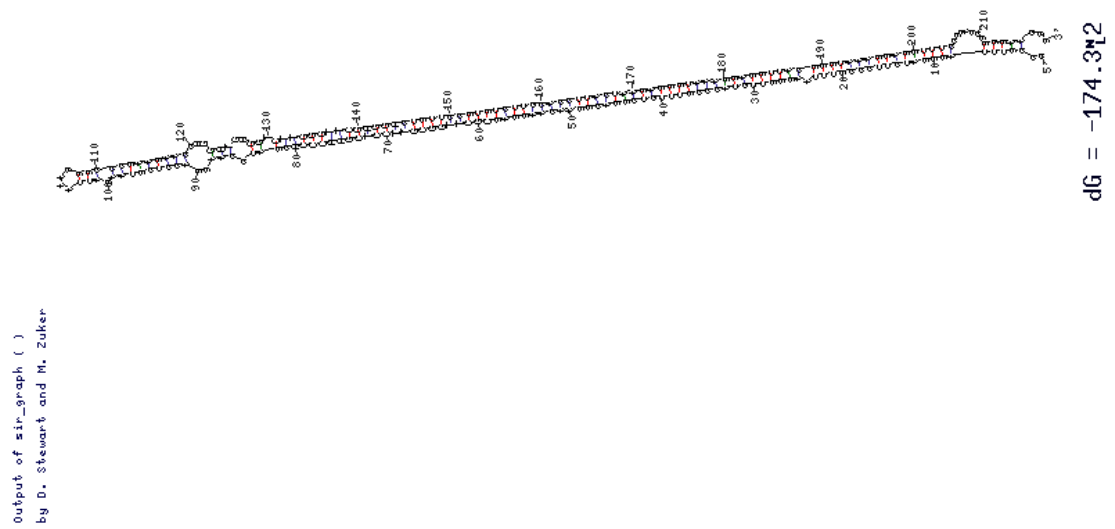

### Pre-miRNA 3

Output of mir\_graph ( )  
by D. Stewart and M. Zuker

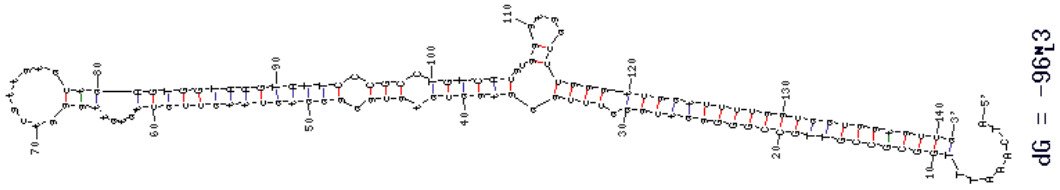

### Pre-miRNA 4

Output of mir\_graph ( )  
by D. Stewart and M. Zuker

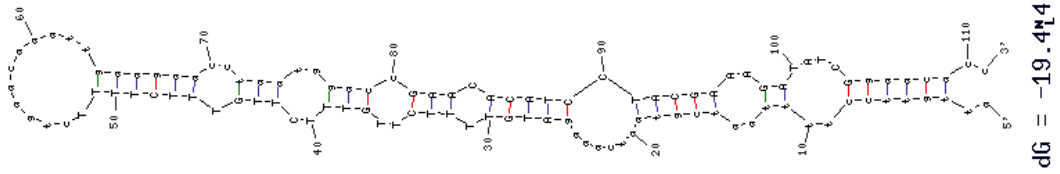

## Pre-miRNA 5

Output of `sir_graph ( )`  
by D. Stewart and M. Zuker

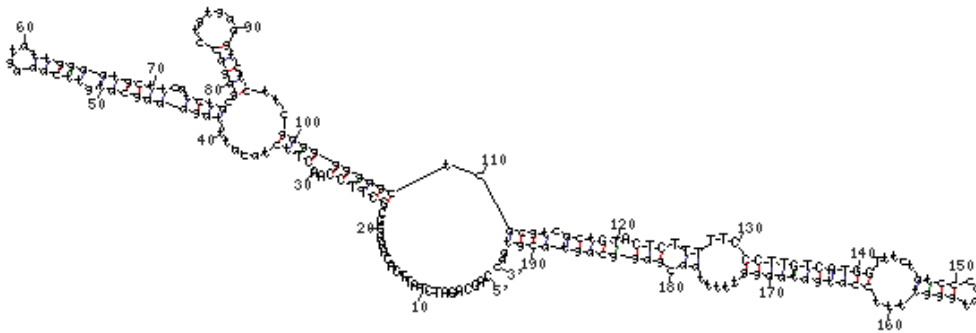

$$\Delta G = -57.6 \text{ kcal/mol}$$

## Pre-miRNA 6

Output of mir\_graph ( )  
by D. Stewart and M. Zuker

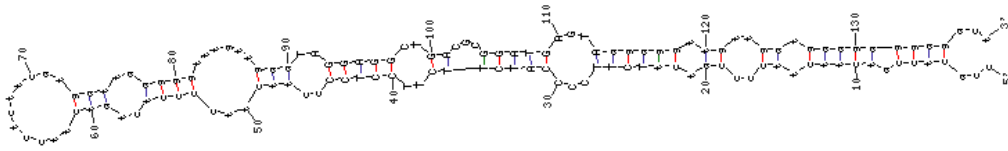

dG = -42.476

## Pre-miRNA 7

Output of mir\_graph ( )  
by D. Stewart and M. Zuker

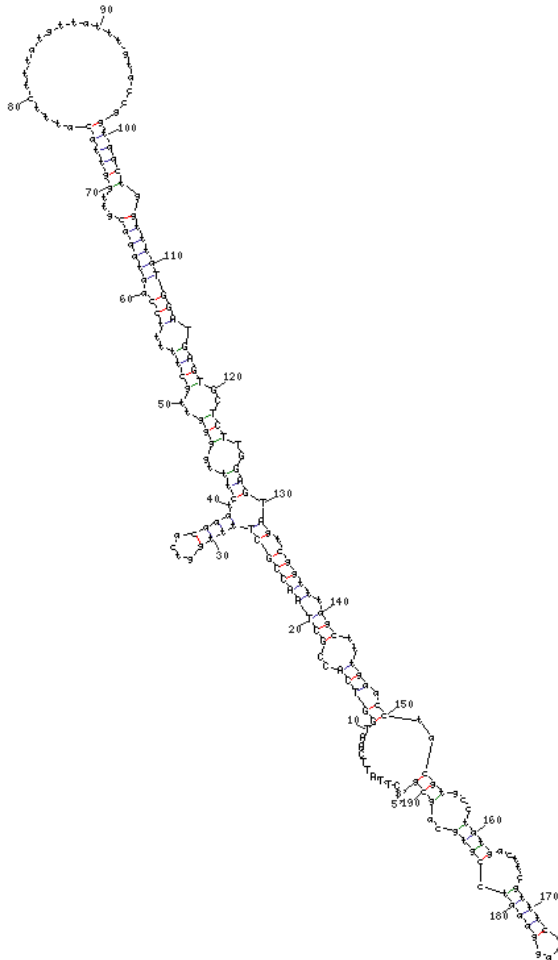

dG = -41.177

# Pre-miRNA 8

Output of `sir_graph ( )`  
by D. Stewart and M. Zuker

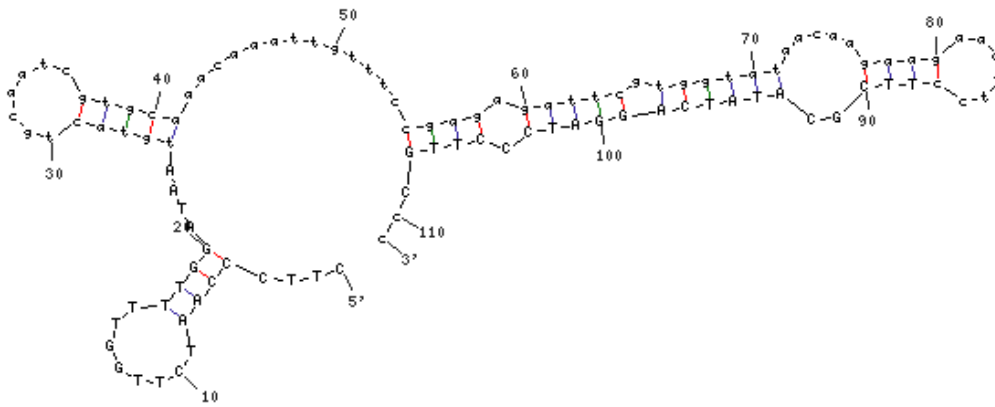

$$\Delta G = -22.378$$

# Pre-miRNA 9

Output of `sir_graph ( )`  
by D. Stewart and M. Zuker

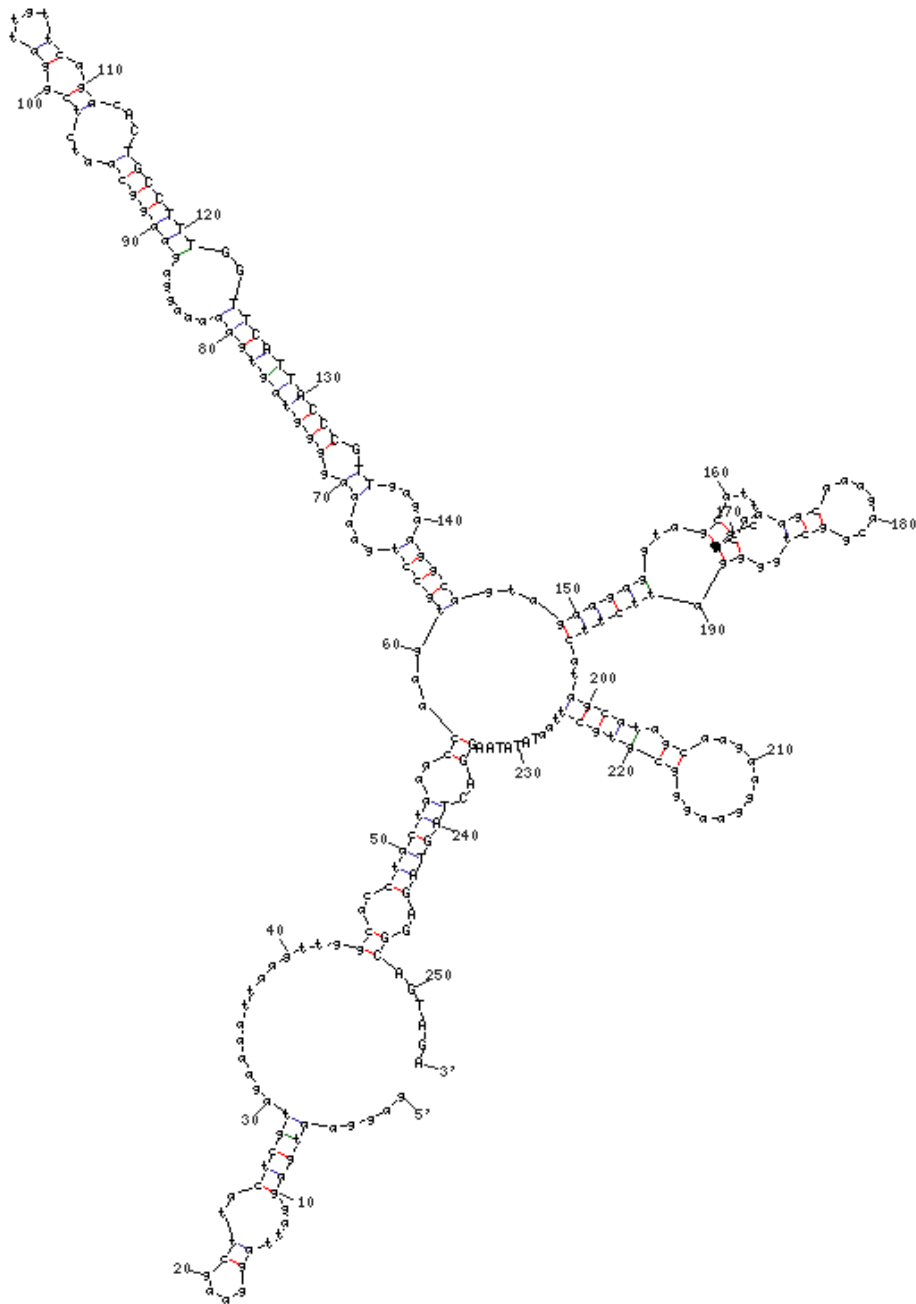

$$\Delta G = -70.219$$

## Pre-miRNA 10

Output of mir\_graph ( )  
by D. Stewart and M. Zuker

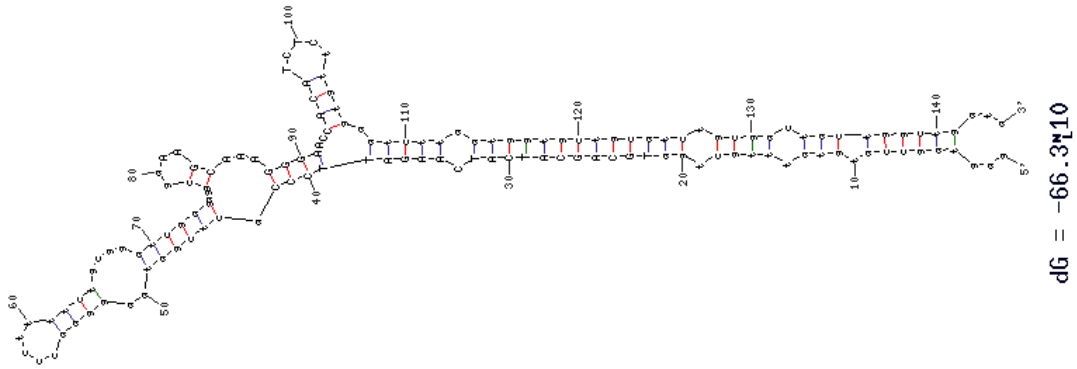

## Pre-miRNA 11

Output of mir\_graph ( )  
by D. Stewart and M. Zuker

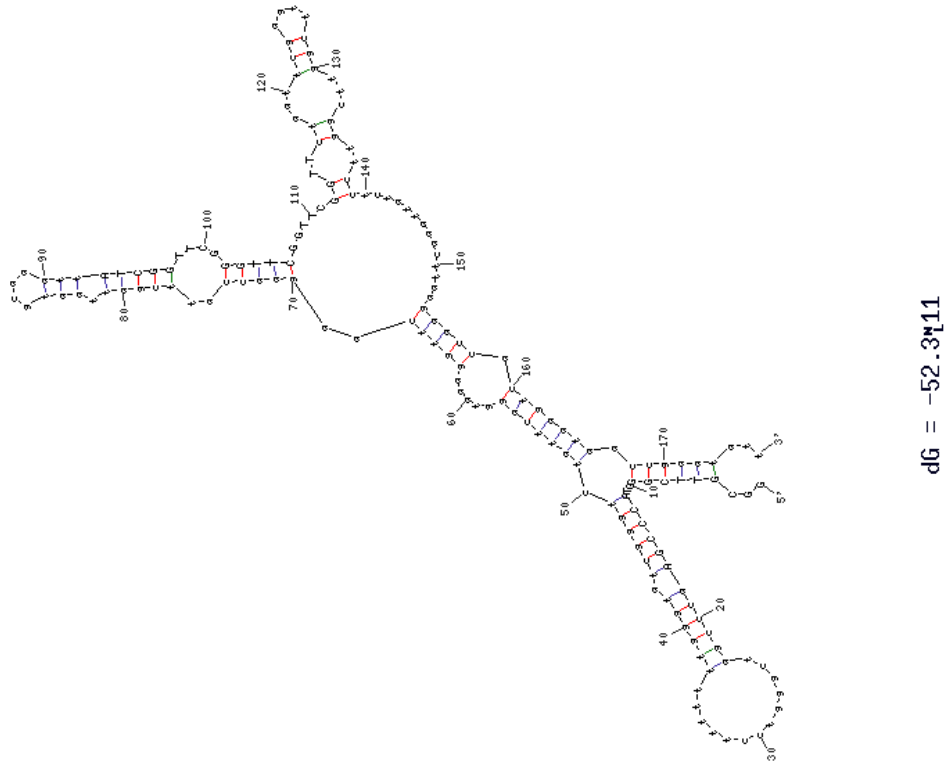

## Pre-miRNA 12

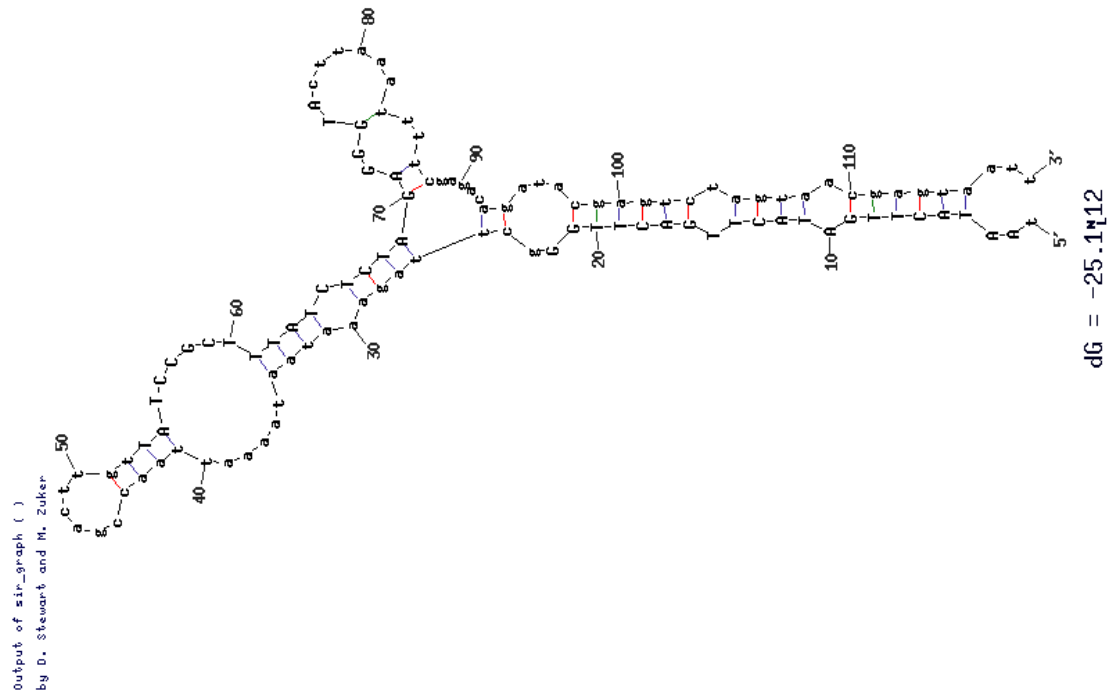

## Pre-miRNA 13

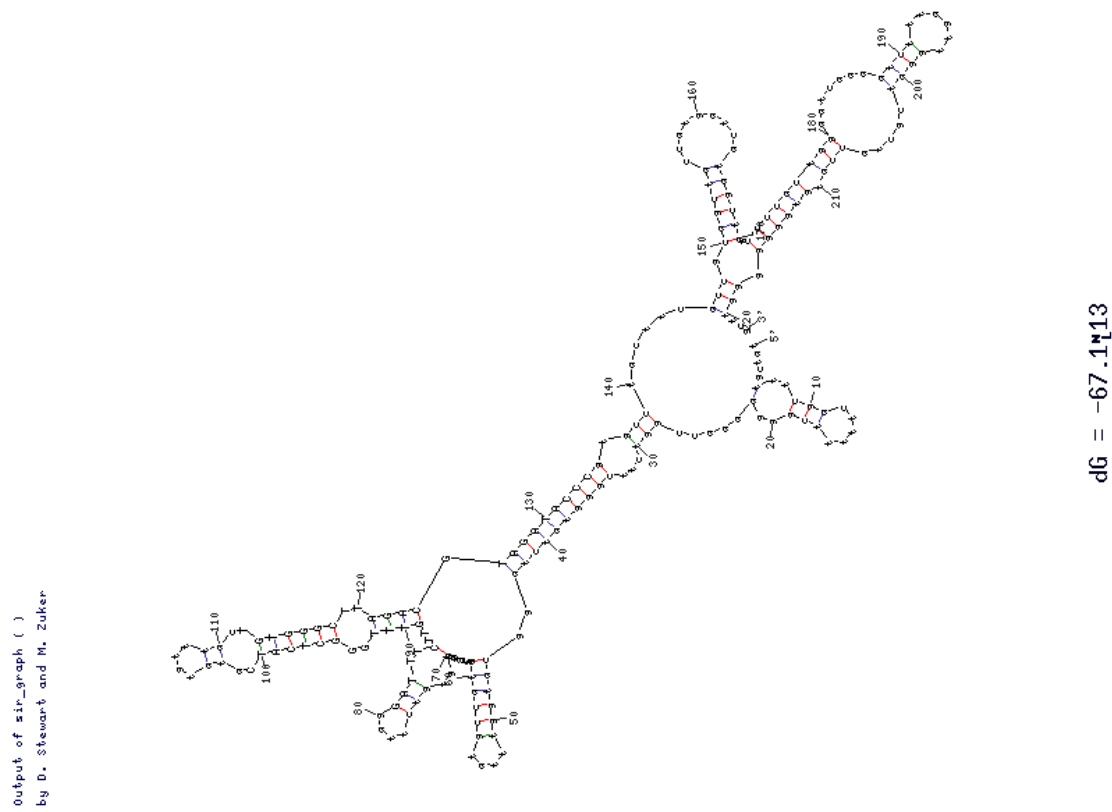



## Pre-miRNA 14

Output of mir\_graph ( )  
by D. Stewart and M. Zuker

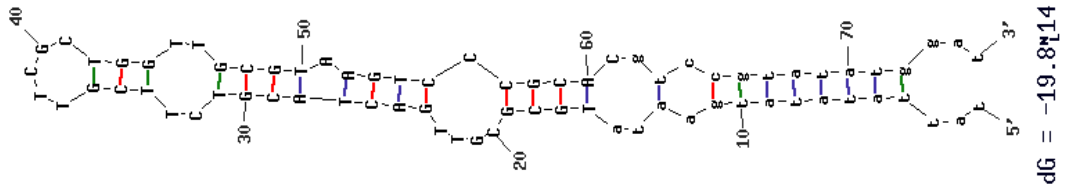

## Pre-miRNA 15

Output of mir\_graph ( )  
by D. Stewart and M. Zuker

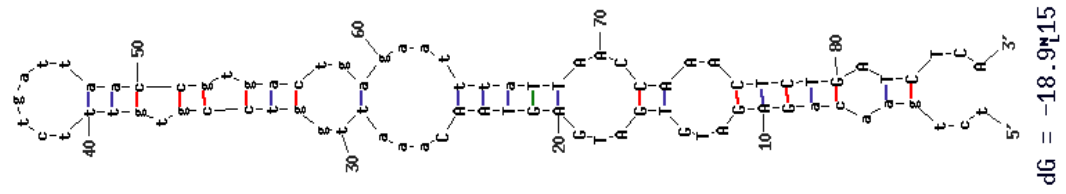

# Pre-miRNA 16

Output of `sir_graph ( )`  
by D. Stewart and M. Zuker

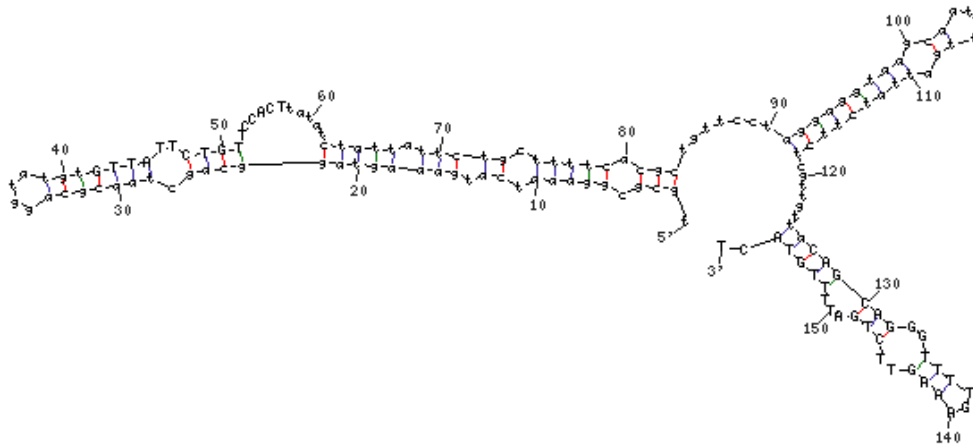

$$dG = -34.3416$$

# Pre-miRNA 17

Output of `sir_graph ( )`  
by D. Stewart and M. Zuker

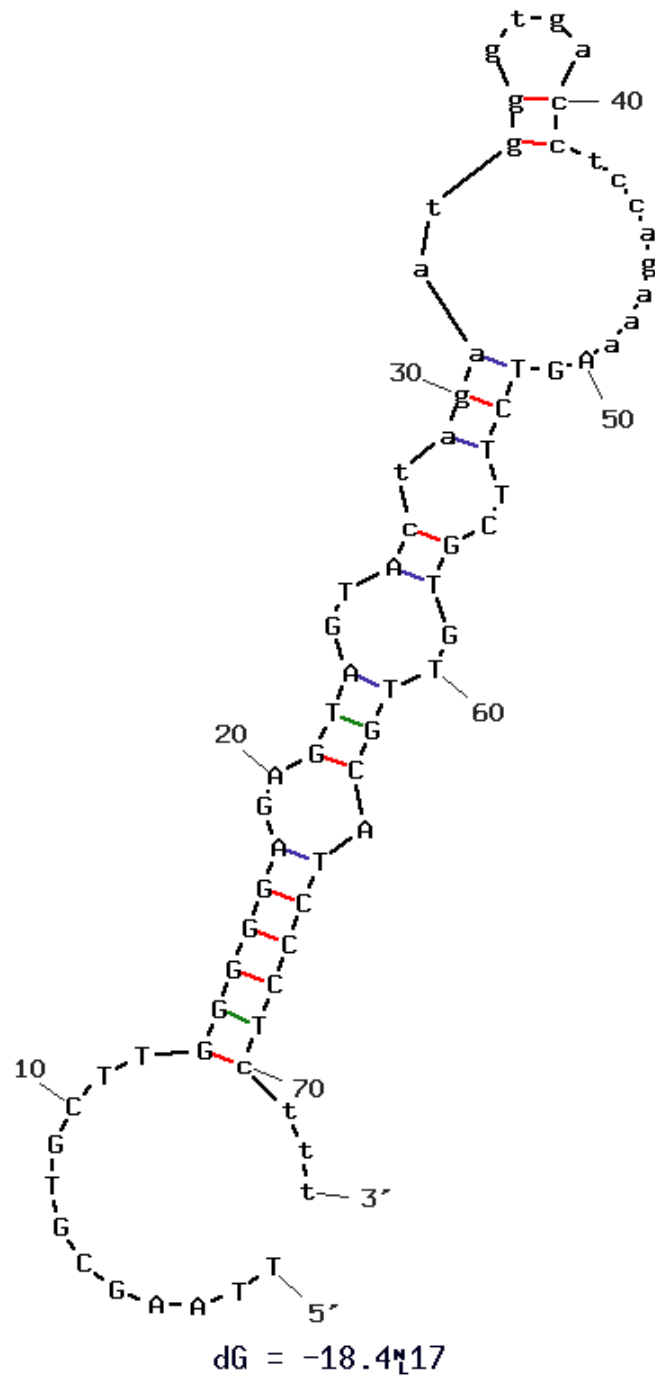

## Pre-miRNA 18

Output of `mir_graph ( )`  
 by D. Stewart and M. Zuker

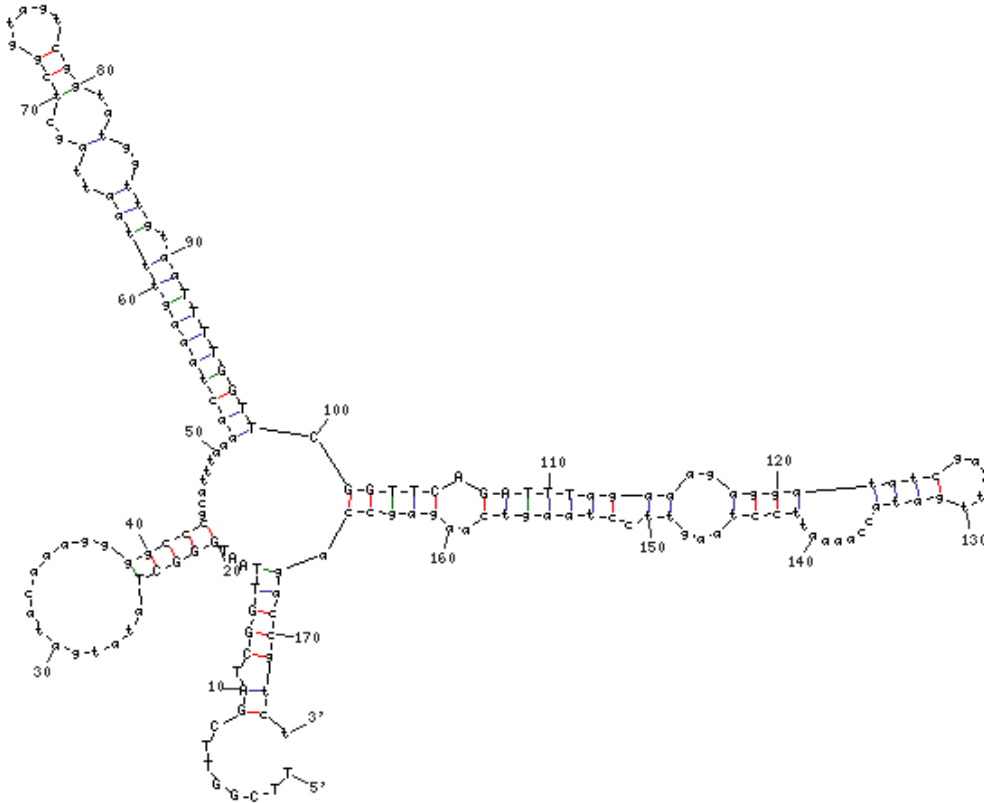

$$\Delta G = -40.4118$$

# Pre-miRNA 19

Output of mir\_graph ( )  
by D. Stewart and M. Zuker

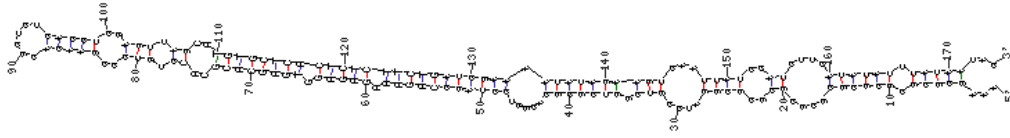

dG = -80.3719

# Pre-miRNA 20

Output of mir\_graph ( )  
by D. Stewart and M. Zuker

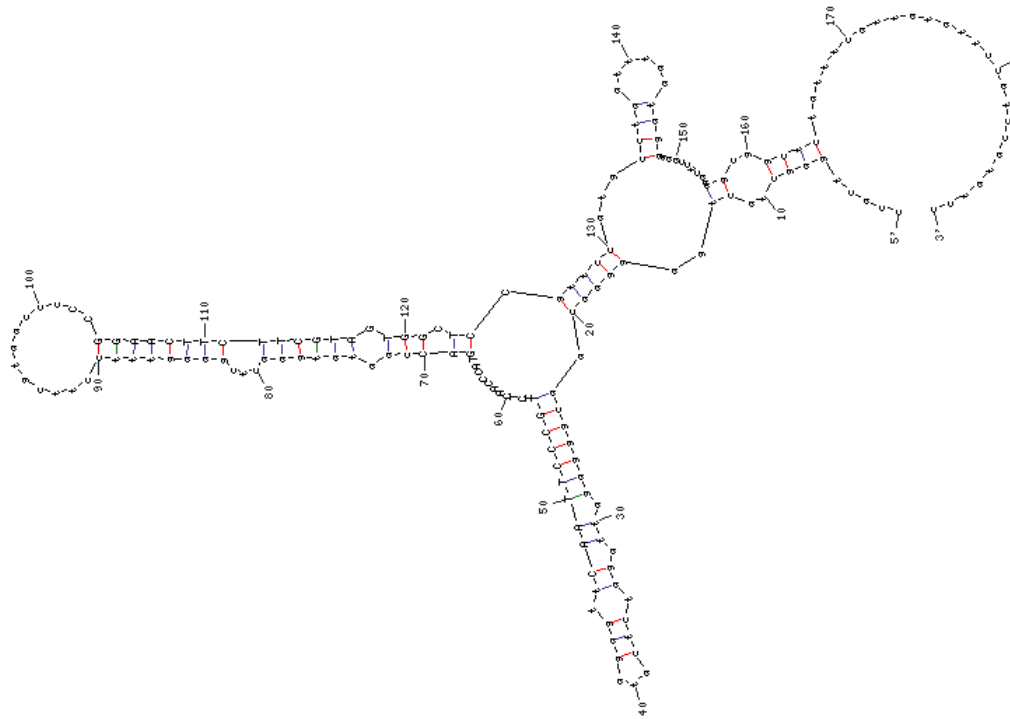

dG = -44.6720

## Pre-miRNA 21

Output of `mir_graph ( )`  
by D. Stewart and M. Zuker

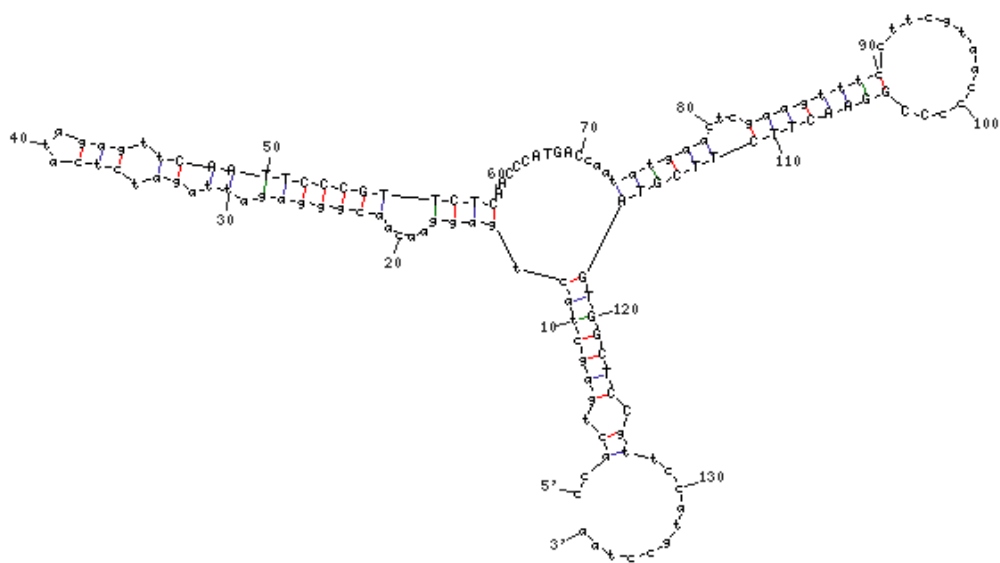

$$dG = -34.9721$$

Pre-miRNA 22/ Pre-miRNA 23

Output of `sir_graph ( )`  
by D. Stewart and M. Zuker

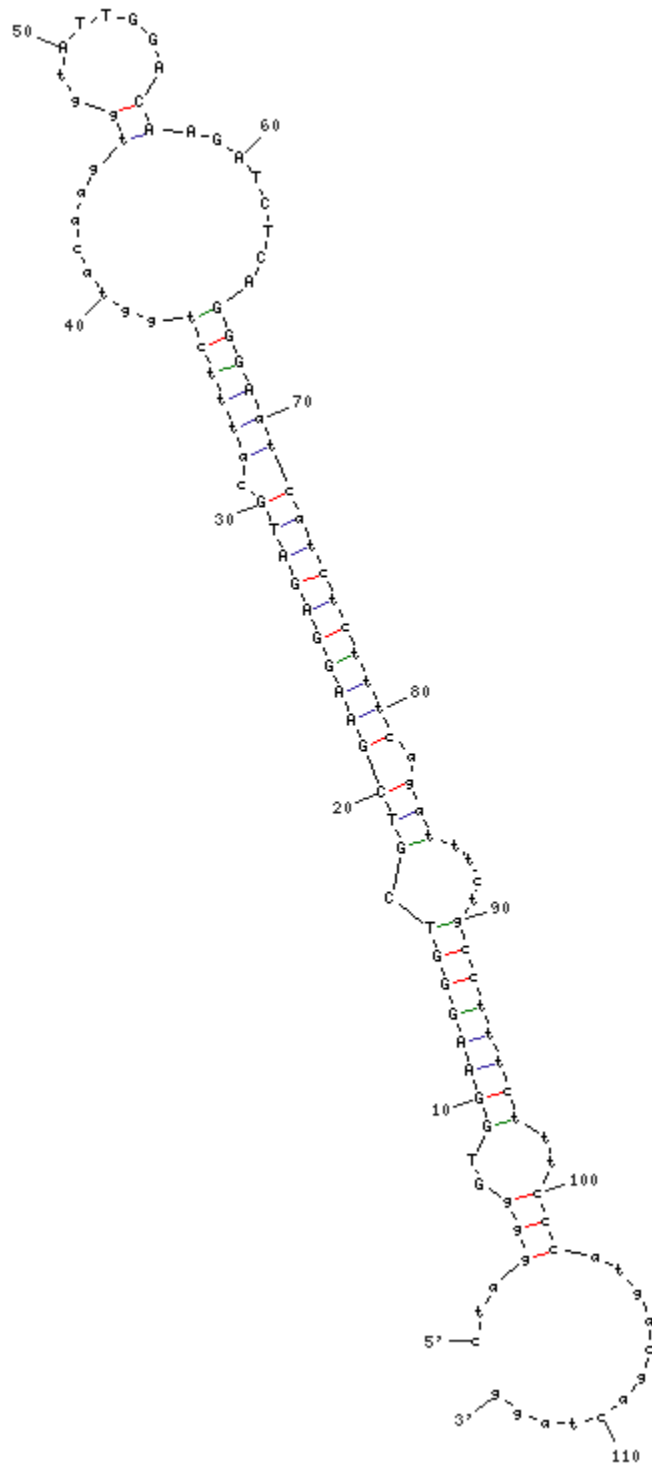

$dG = -37.9422$

## Pre-miRNA 24/ Pre-miRNA 25

Output of `mir_graph ( )`  
by D. Stewart and M. Zuker

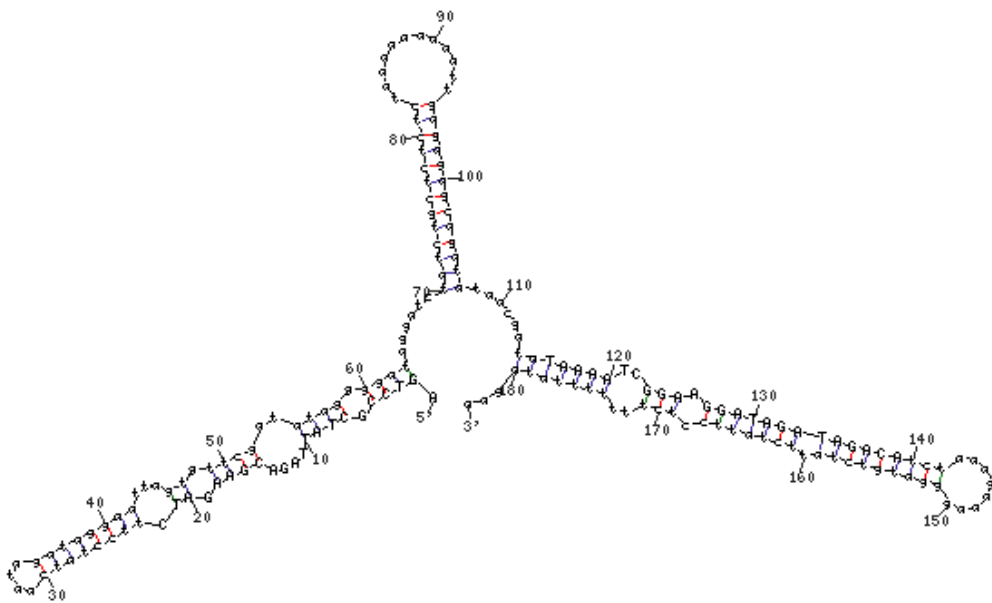

$$\Delta G = -71.24$$



## Pre-miRNA 26

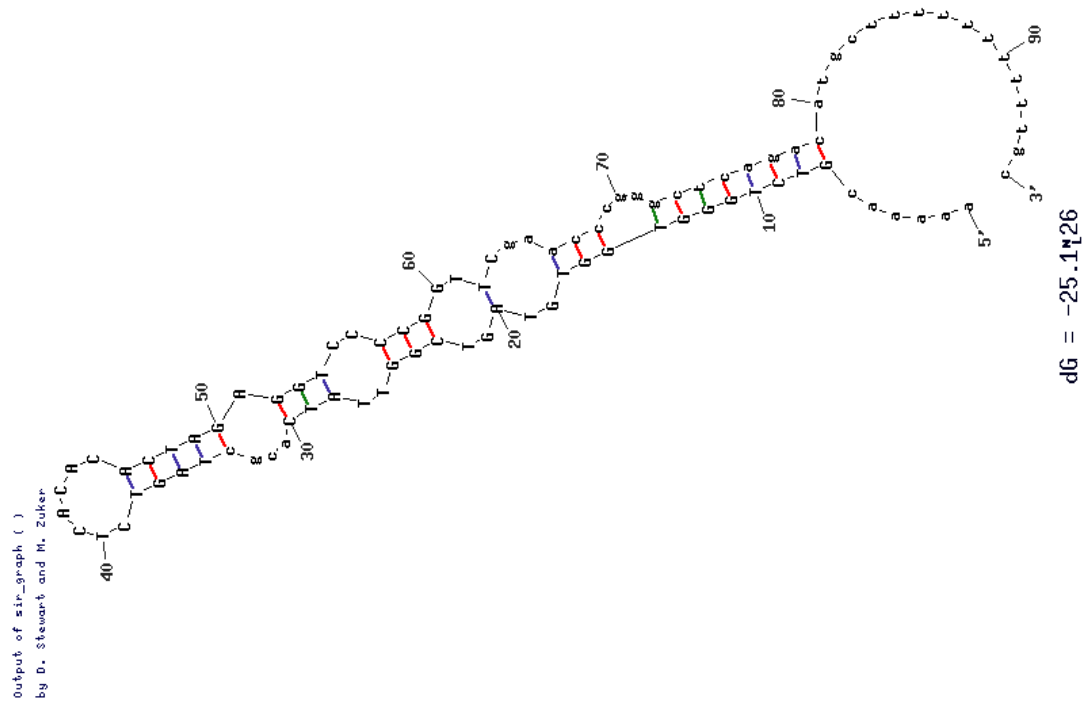

## Pre-miRNA 27

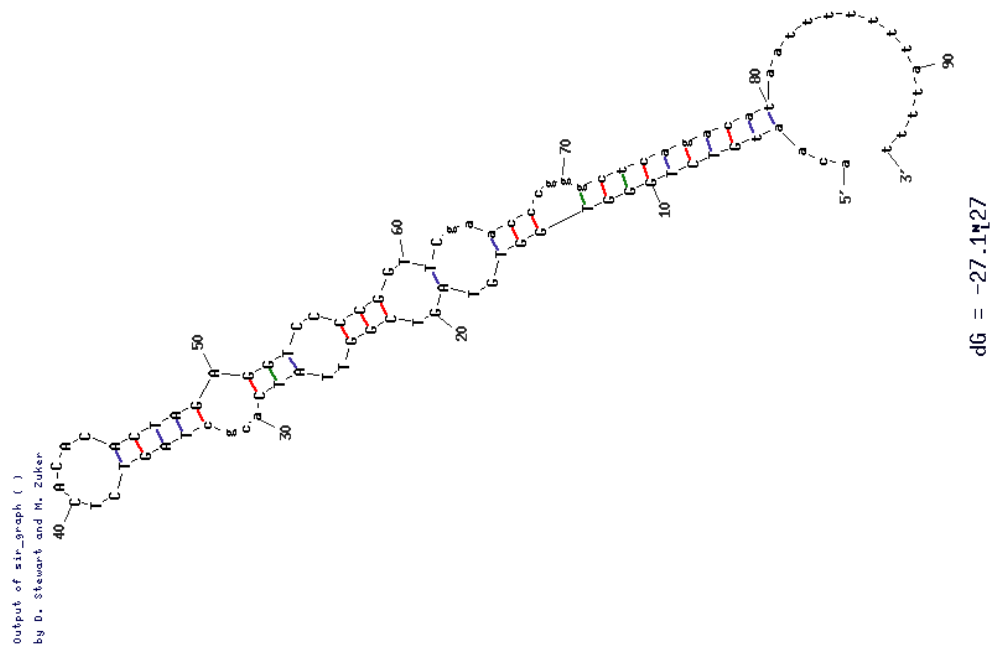

# Pre-miRNA 28

Output of mir\_graph ( )  
by D. Stewart and M. Zuker

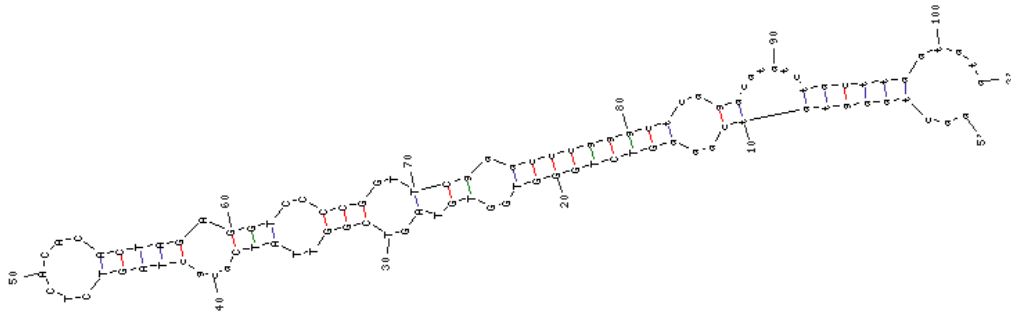

dG = -29.5 kcal/mol

# Pre-miRNA 29

Output of mir\_graph ( )  
by D. Stewart and M. Zuker

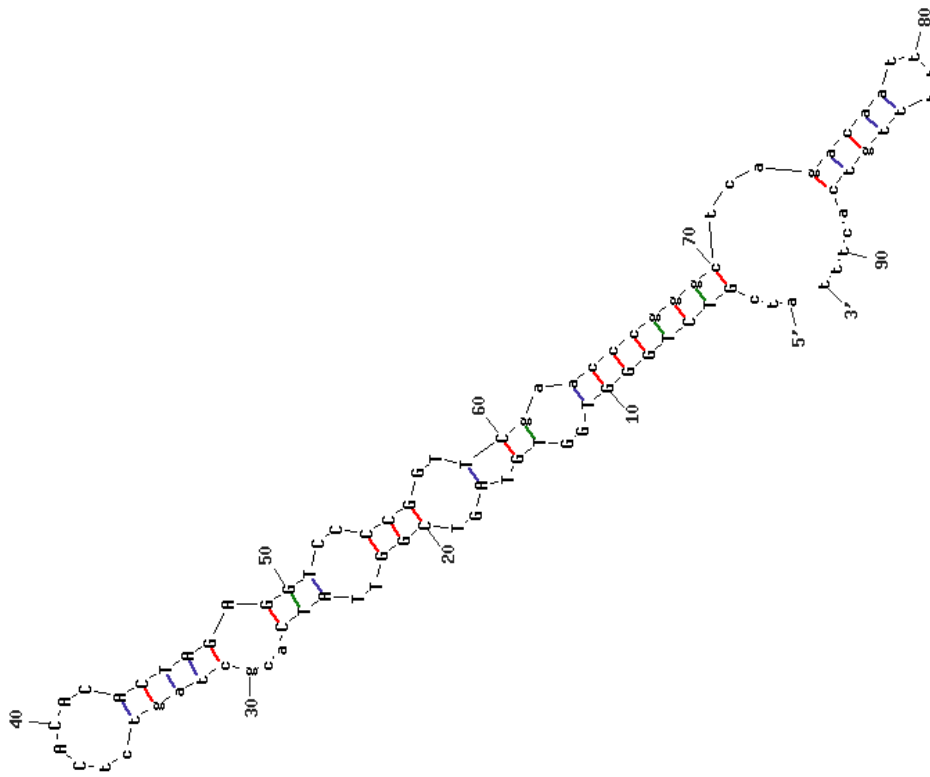

dG = -29.9 kcal/mol

## Pre-miRNA 30

Output of mir\_graph ( )  
by D. Stewart and M. Zuker

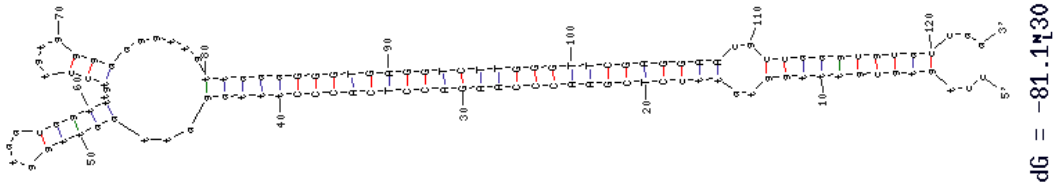

## Pre-miRNA 31

Output of mir\_graph ( )  
by D. Stewart and M. Zuker

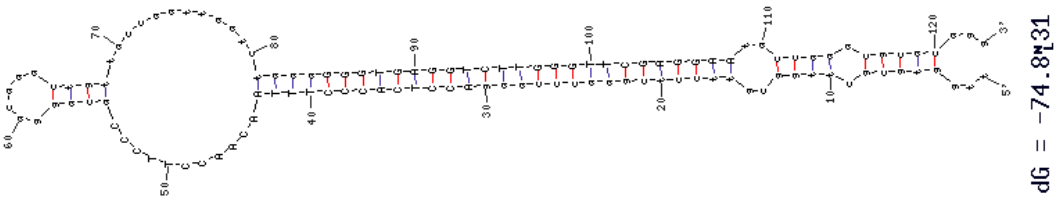

### Pre-miRNA 32

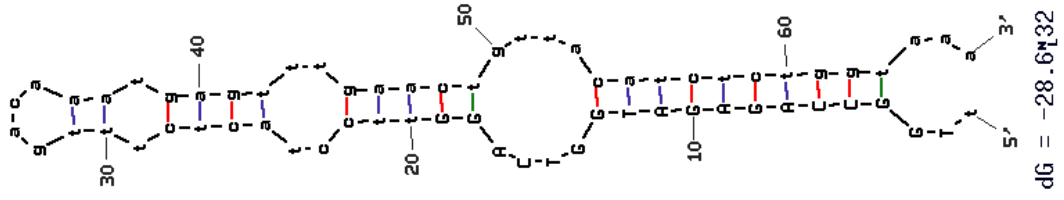

Output of mir\_graph ( )  
by D. Stewart and M. Zuker

### Pre-miRNA 33

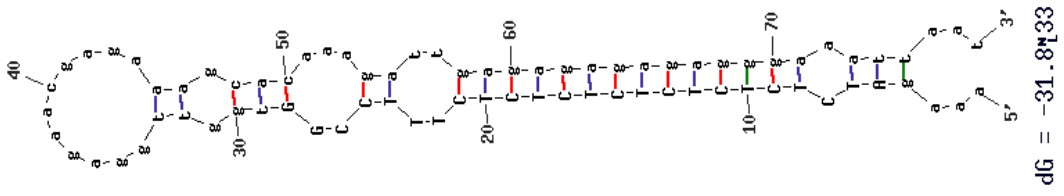

Output of mir\_graph ( )  
by D. Stewart and M. Zuker

## Pre-miRNA 34

Output of mir\_graph ( )  
by D. Stewart and M. Zuker

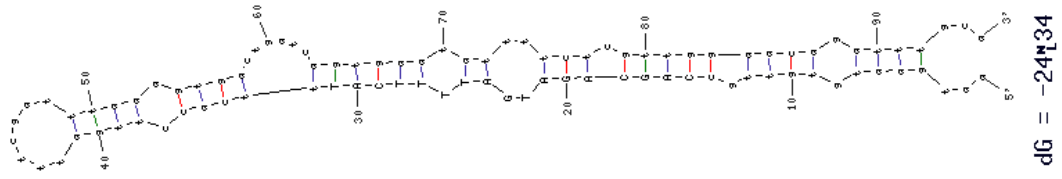

## Pre-miRNA 35

Output of mir\_graph ( )  
by D. Stewart and M. Zuker

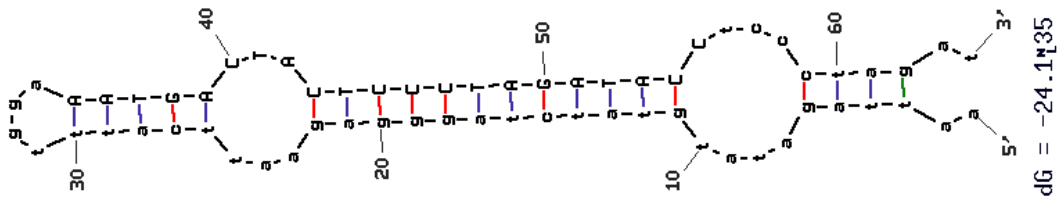

## Pre-miRNA 36

Output of mir\_graph ( )  
by D. Stewart and M. Zuker

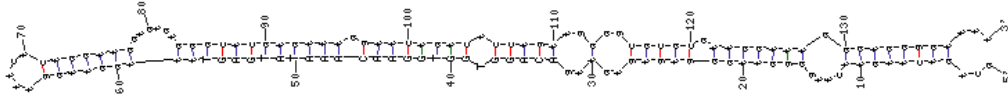

dG = -54.8 kcal/mol

## Pre-miRNA 37

Output of mir\_graph ( )  
by D. Stewart and M. Zuker

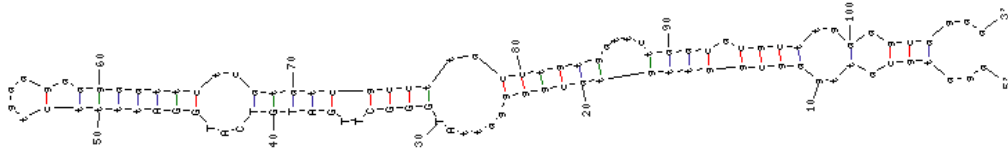

dG = -32.3 kcal/mol

## Pre-miRNA 38

Output of mir\_graph ( )  
by D. Stewart and M. Zuker

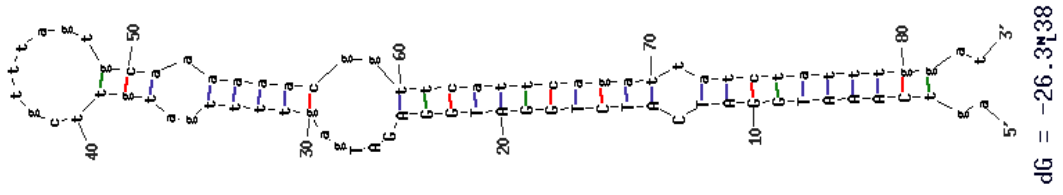

## Pre-miRNA 39

Output of mir\_graph ( )  
by D. Stewart and M. Zuker

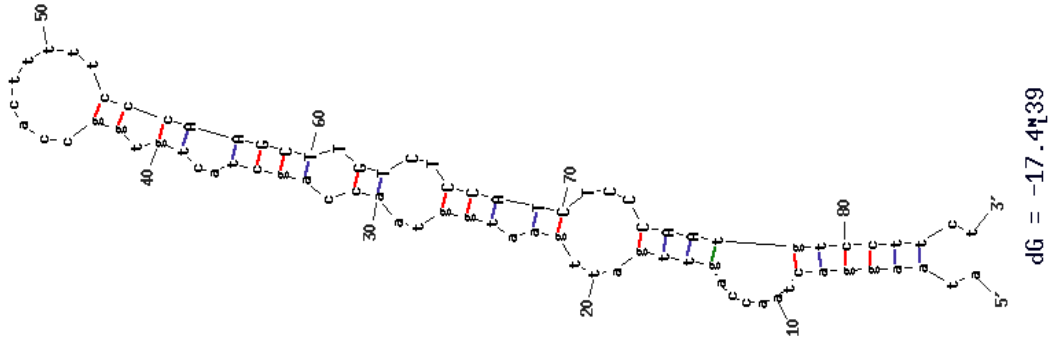

# Pre-miRNA 40

Output of mir\_graph ( )  
by D. Stewart and M. Zuker

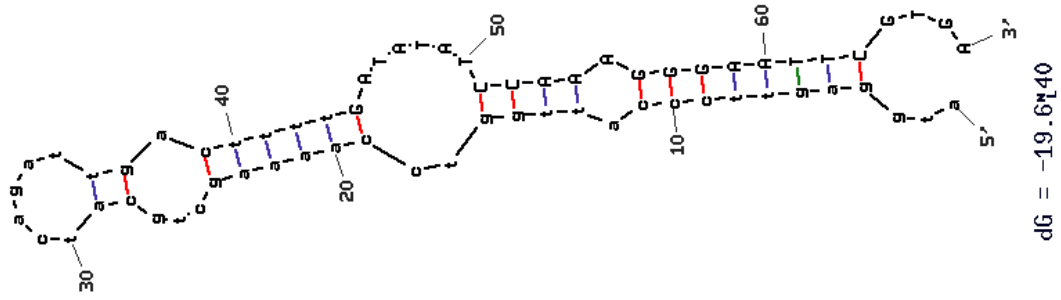

# Pre-miRNA 41

Output of mir\_graph ( )  
by D. Stewart and M. Zuker

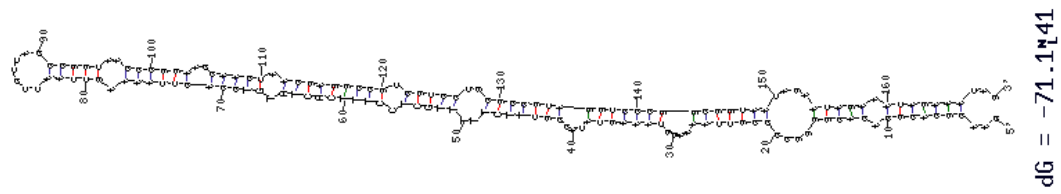



## Pre-miRNA 42

Output of mir\_graph ( )  
by D. Stewart and M. Zuker

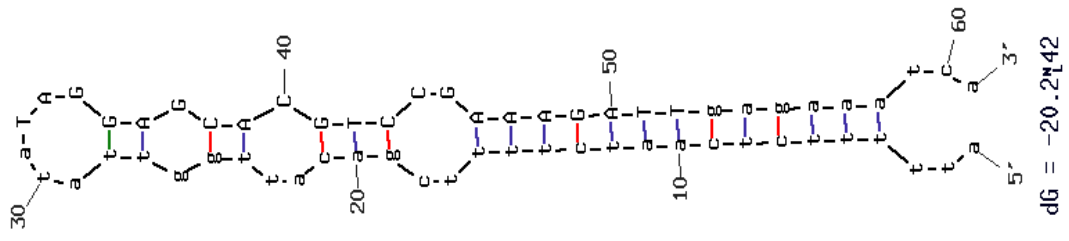

## Pre-miRNA 43

Output of mir\_graph ( )  
by D. Stewart and M. Zuker

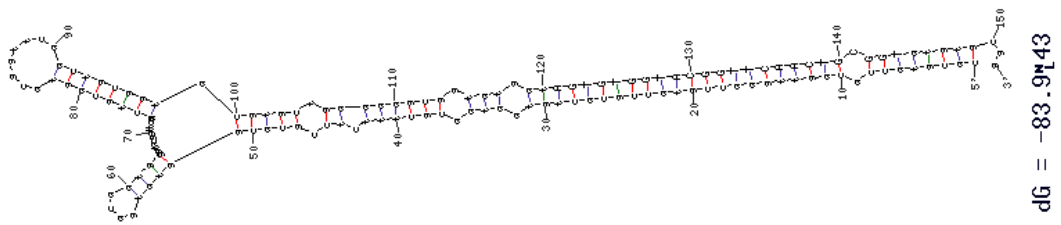

# Pre-miRNA 44

Output of `sir_graph ( )`  
by D. Stewart and M. Zuker

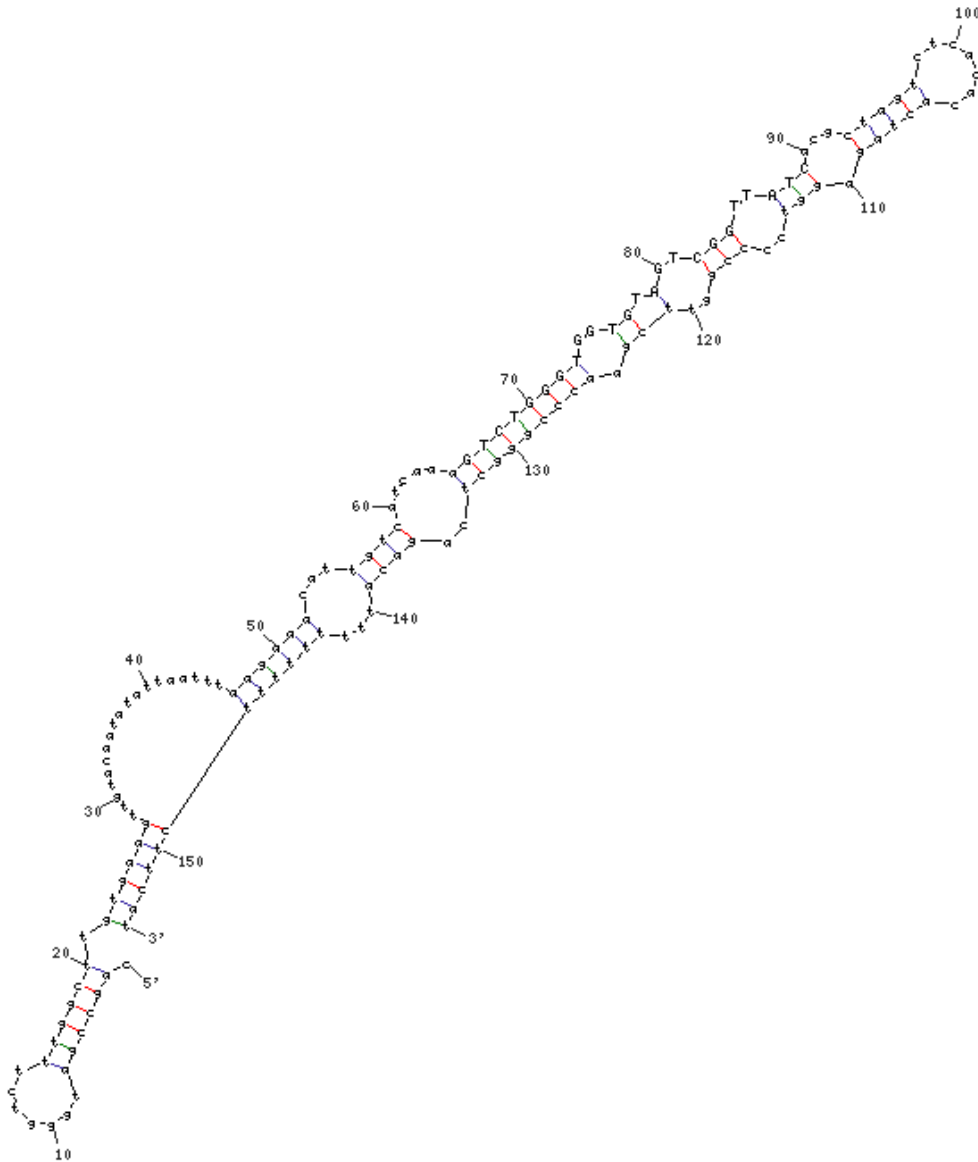

$$\Delta G = -39.144$$

# Pre-miRNA 45

Output of `sir_graph ( )`  
by D. Stewart and M. Zuker

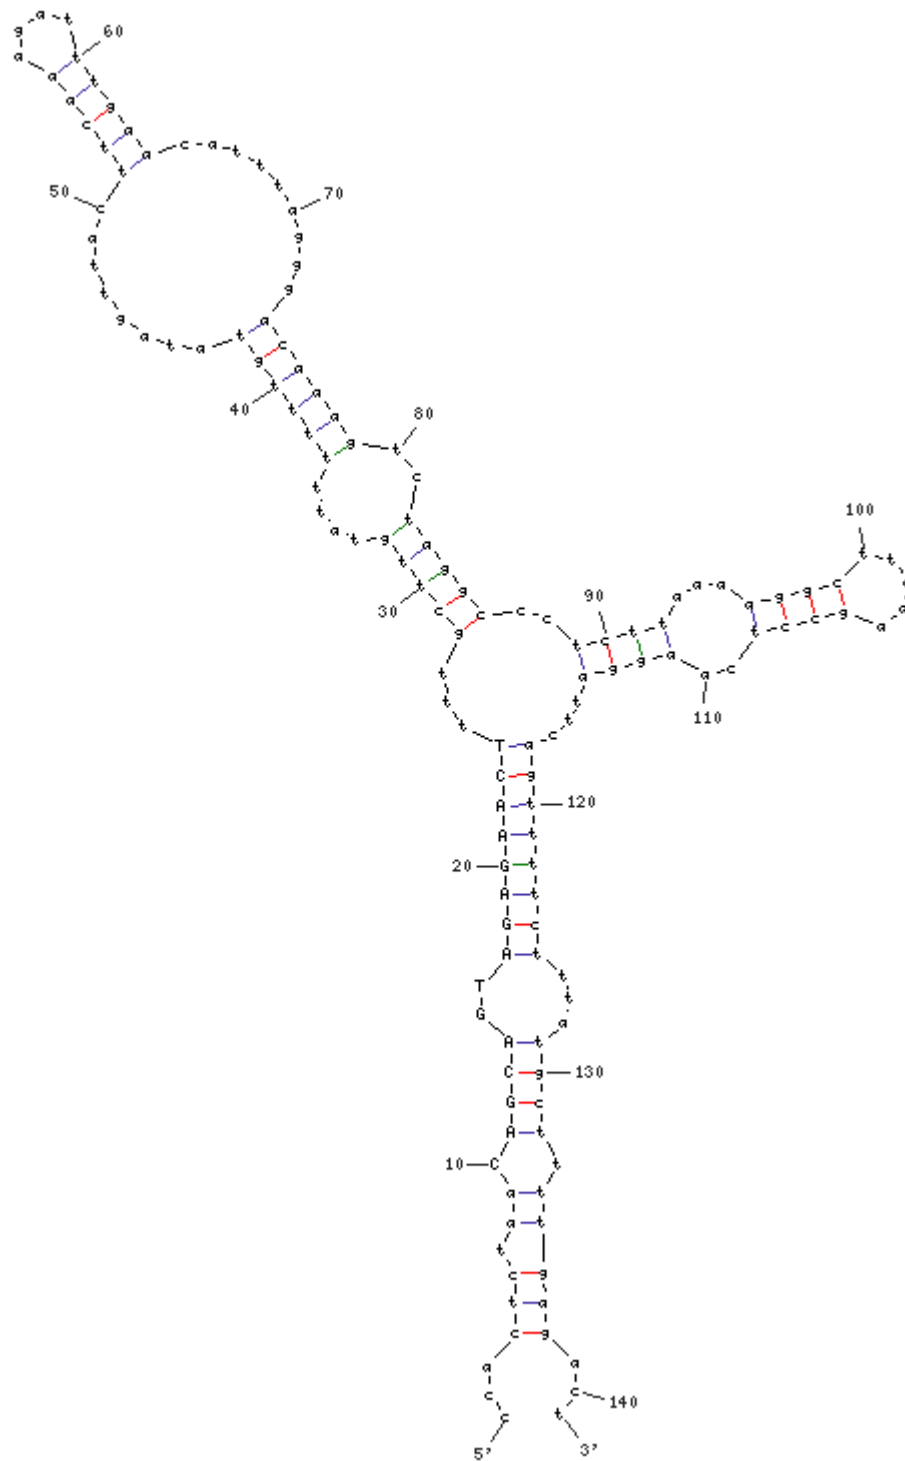

$$\Delta G = -30.5 \text{ kcal/mol}$$

## Pre-miRNA 46

Output of `sir_graph` ( )  
 by D. Stewart and M. Zuker

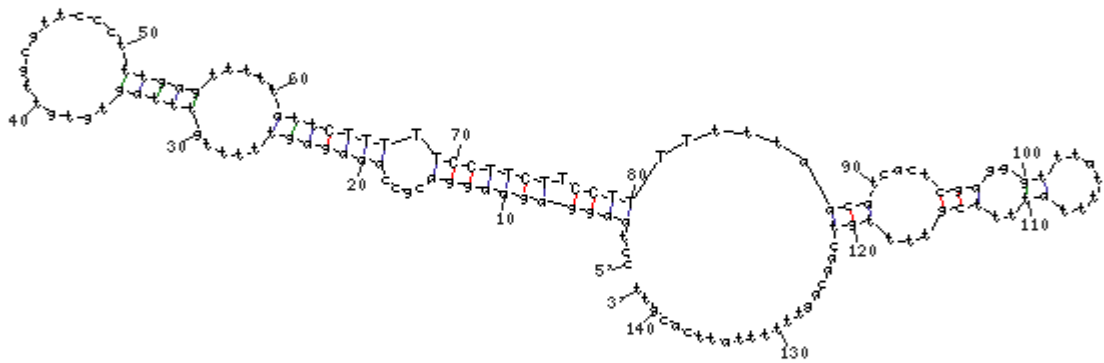

$$\Delta G = -20.7446$$

### Pre-miRNA 47

Output of mir\_graph ( )  
by D. Stewart and M. Zuker

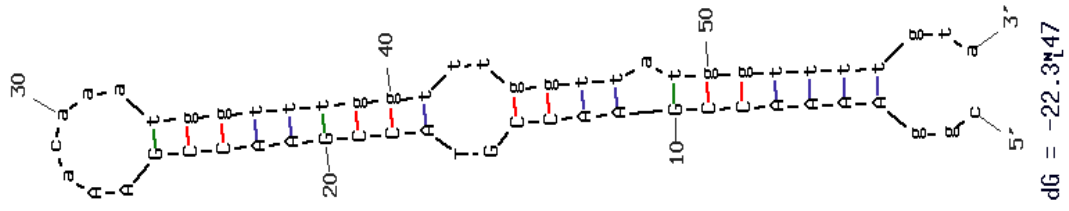

### Pre-miRNA 48

Output of mir\_graph ( )  
by D. Stewart and M. Zuker

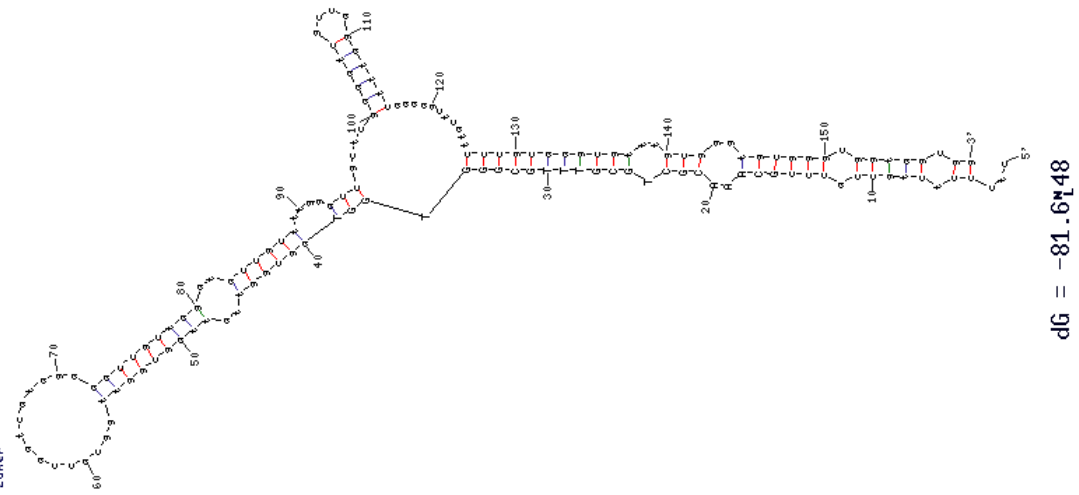

## Pre-miRNA 49

Output of mir\_graph ( )  
by D. Stewart and M. Zuker

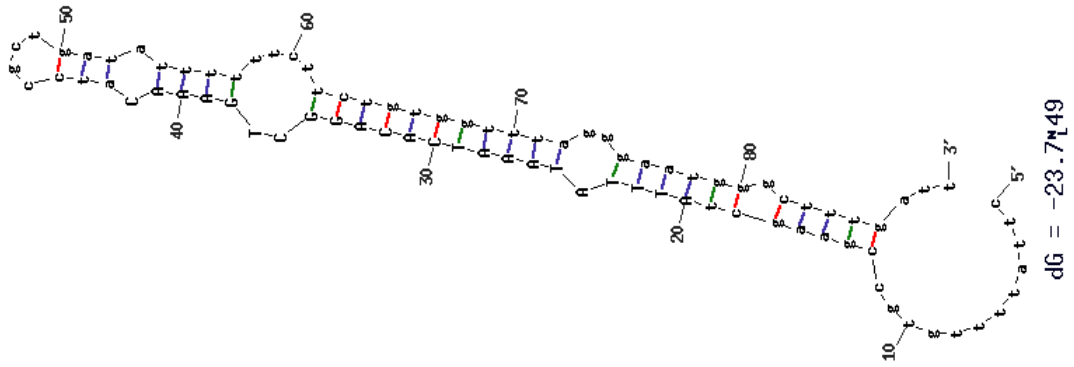

## Pre-miRNA 50

Output of mir\_graph ( )  
by D. Stewart and M. Zuker

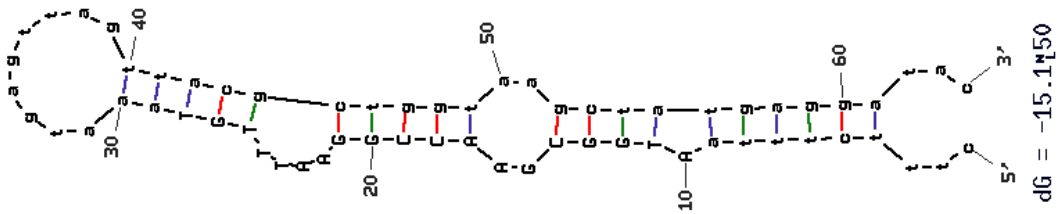

# Pre-miRNA 51

Output of `sir_graph ( )`  
by D. Stewart and M. Zuker

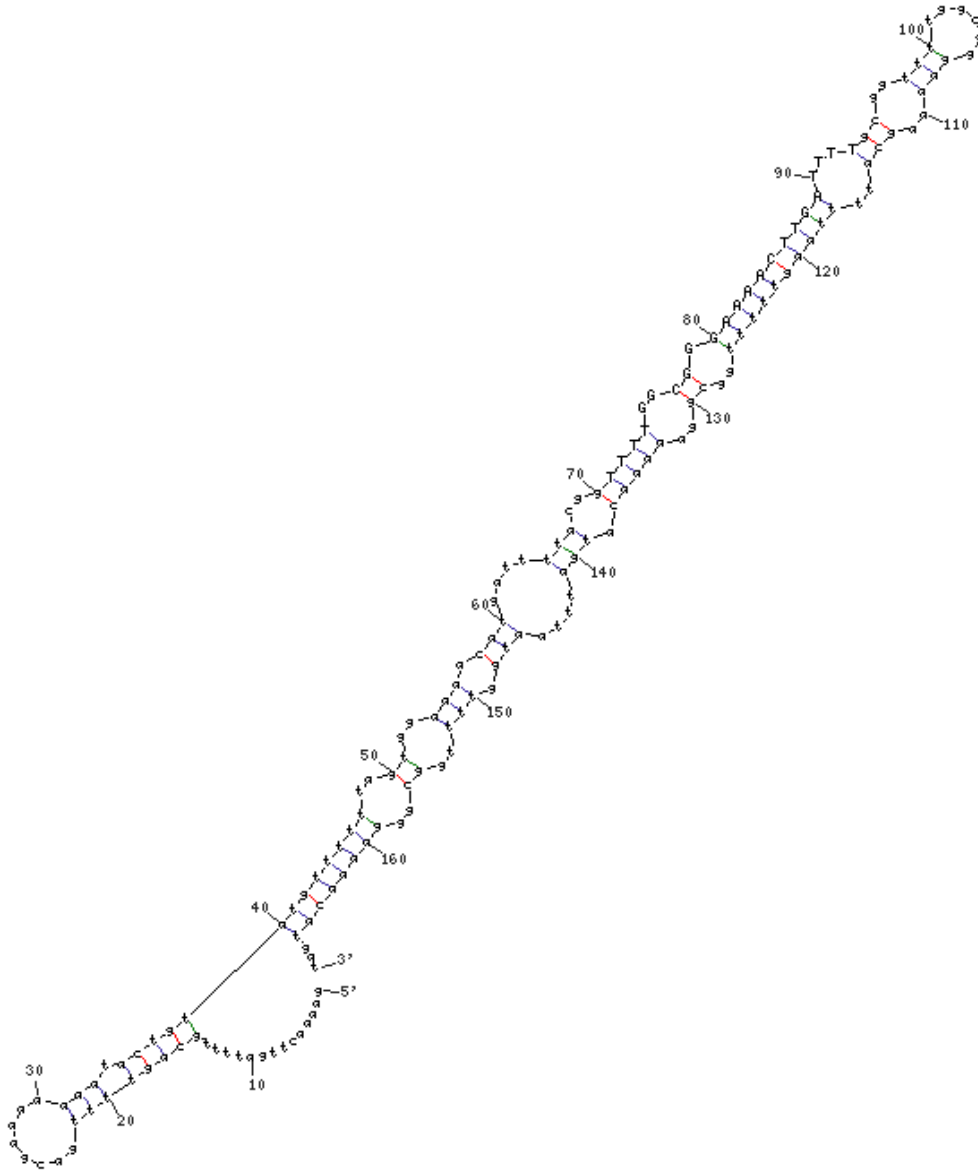

$$\Delta G = -32.9 \text{ kcal/mol}$$

## Pre-miRNA 52

Output of mir\_graph ( )  
by D. Stewart and M. Zuker

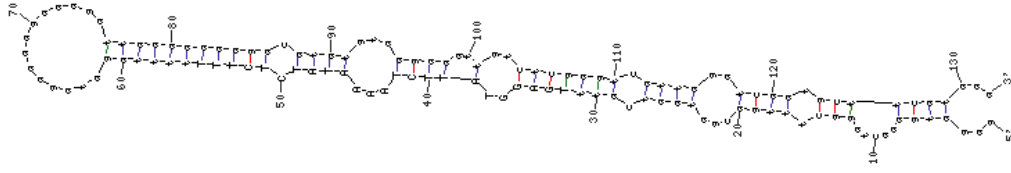

dG = -27.2452

## Pre-miRNA 53

Output of mir\_graph ( )  
by D. Stewart and M. Zuker

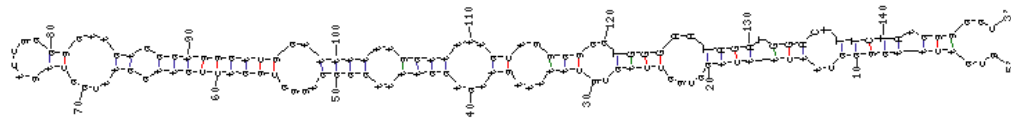

dG = -28.5453



# Pre-miRNA 54

Output of `sir_graph ( )`  
by D. Stewart and M. Zuker

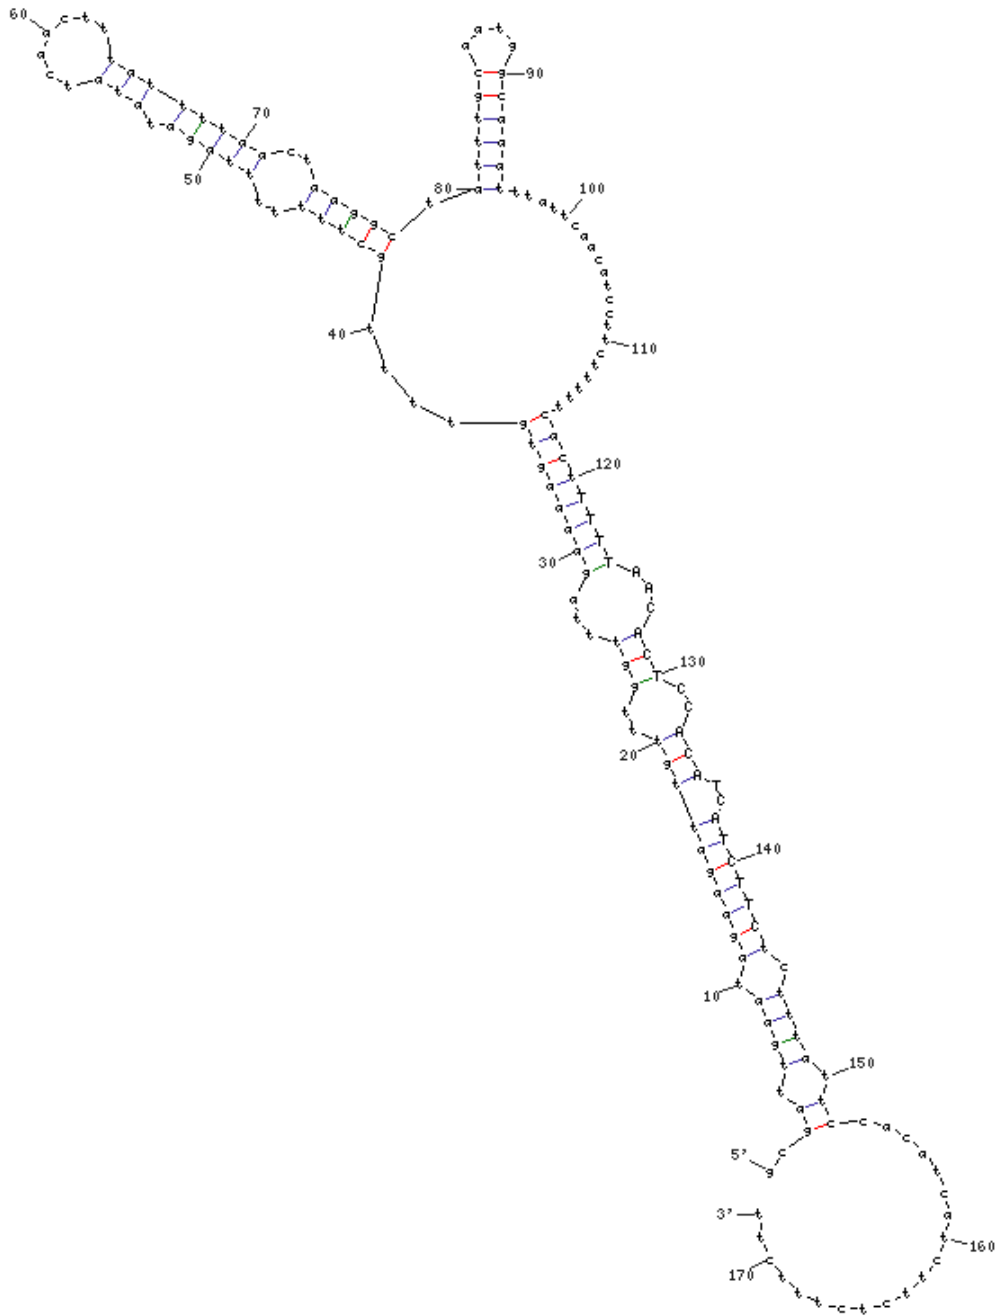

$$\Delta G = -29.4 \text{ kcal/mol}$$

## Pre-miRNA 55

Output of mir\_graph ( )  
by D. Stewart and M. Zuker

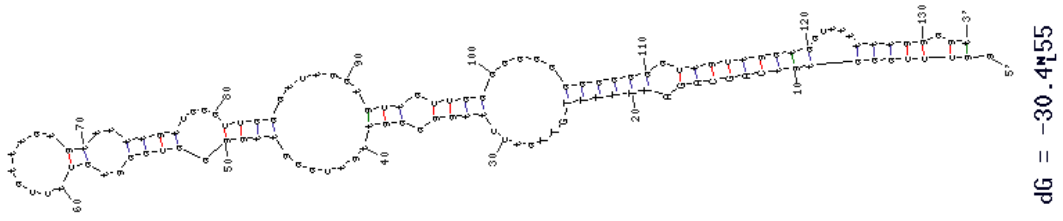

## Pre-miRNA 56

Output of mir\_graph ( )  
by D. Stewart and M. Zuker

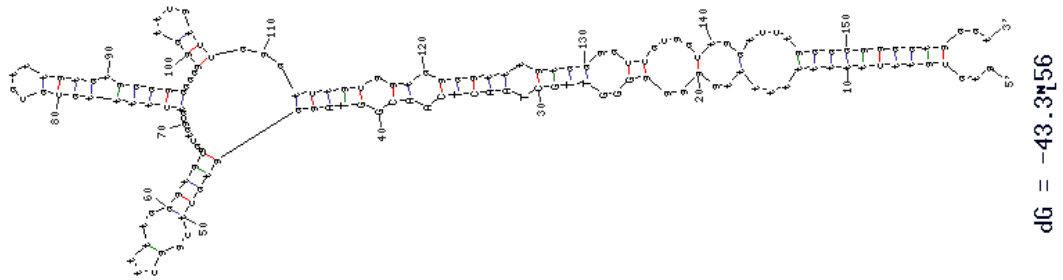

# Pre-miRNA 57

Output of mir\_graph ( )  
by D. Stewart and M. Zuker

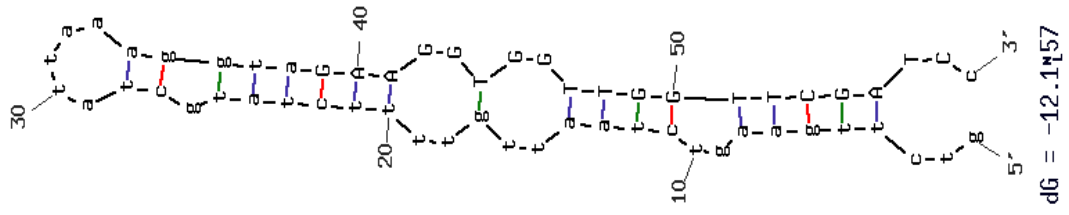

# Pre-miRNA 58

Output of mir\_graph ( )  
by D. Stewart and M. Zuker

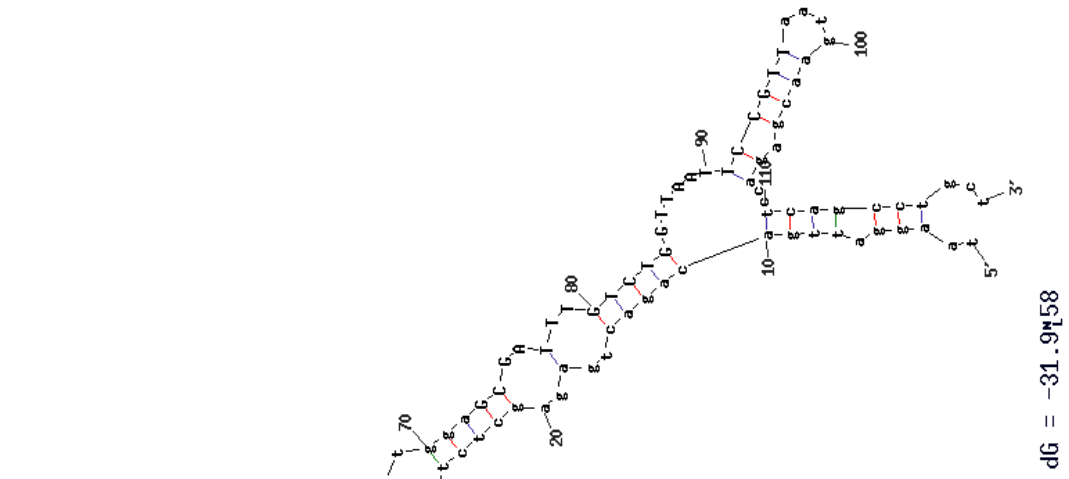

## Pre-miRNA 59

Output of mir\_graph ( )  
by D. Stewart and M. Zuker

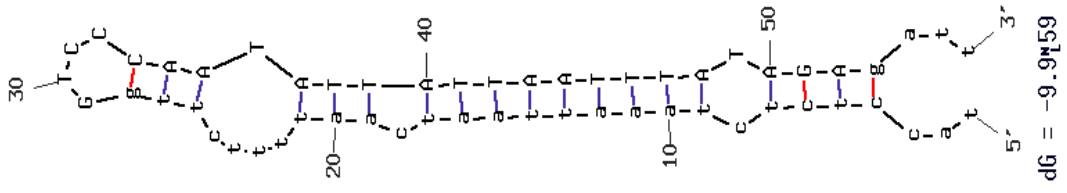

## Pre-miRNA 60

Output of mir\_graph ( )  
by D. Stewart and M. Zuker

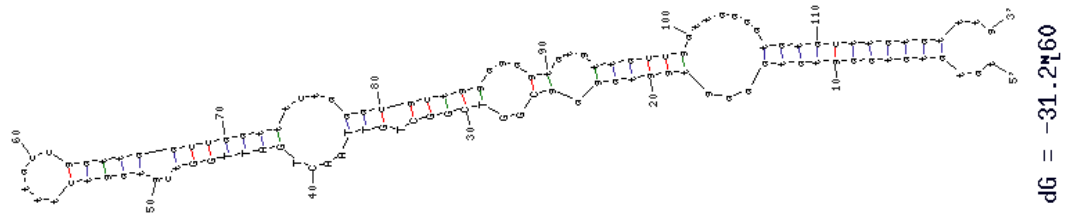

## Pre-miRNA 61

Output of mir\_graph ( )  
by D. Stewart and M. Zuker

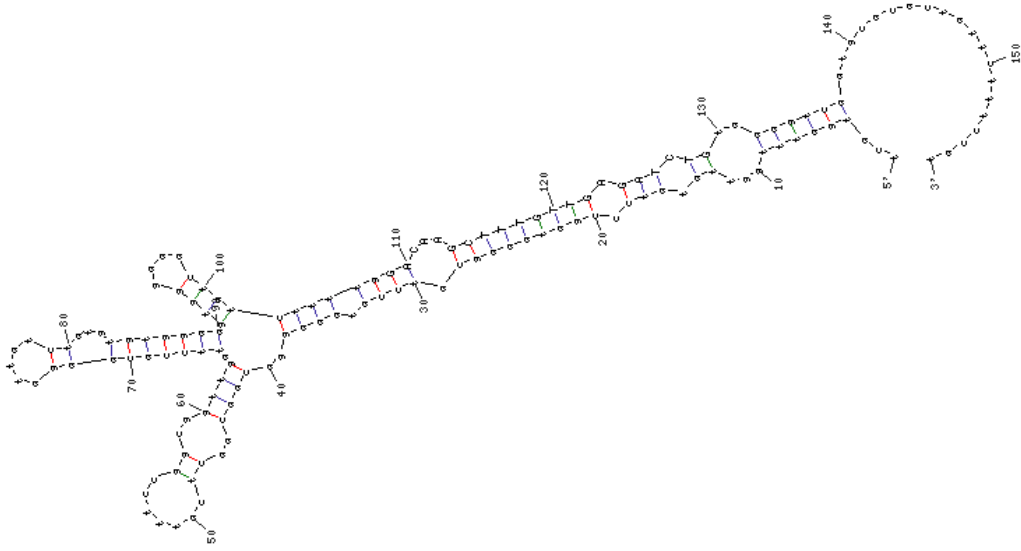

dG = -36.4 kcal/mol

## Pre-miRNA 62

Output of mir\_graph ( )  
by D. Stewart and M. Zuker

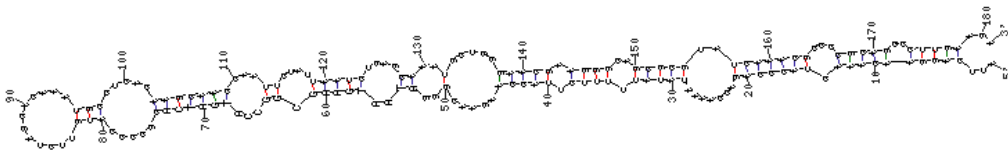

dG = -38.1 kcal/mol

# Pre-miRNA 63

Output of mir\_graph ( )  
by D. Stewart and M. Zuker

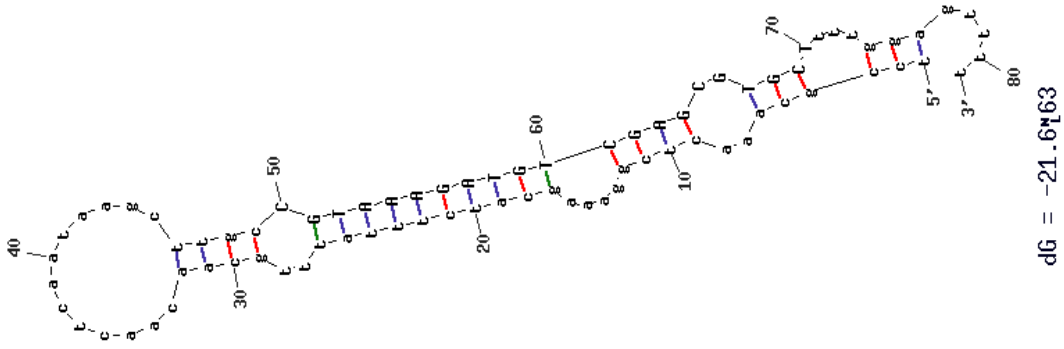

# Pre-miRNA 64

Output of mir\_graph ( )  
by D. Stewart and M. Zuker

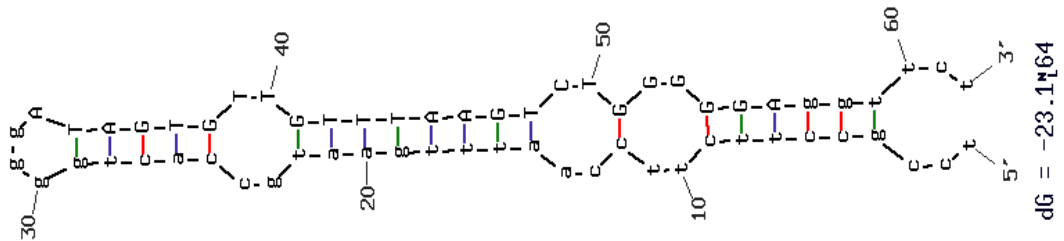

## Pre-miRNA 65

Output of mir\_graph ( )  
by D. Stewart and M. Zuker

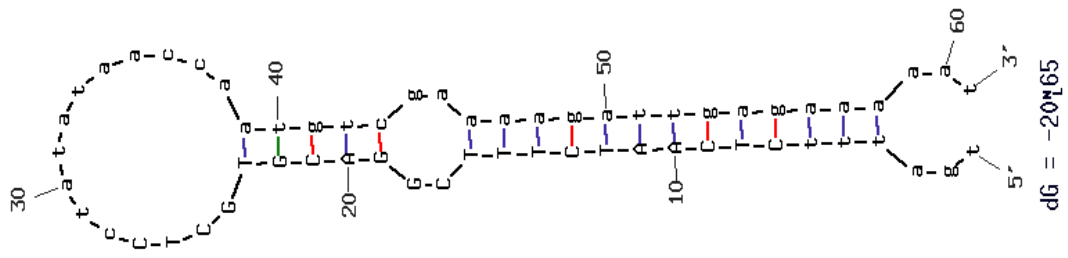

## Pre-miRNA 66

Output of mir\_graph ( )  
by D. Stewart and M. Zuker

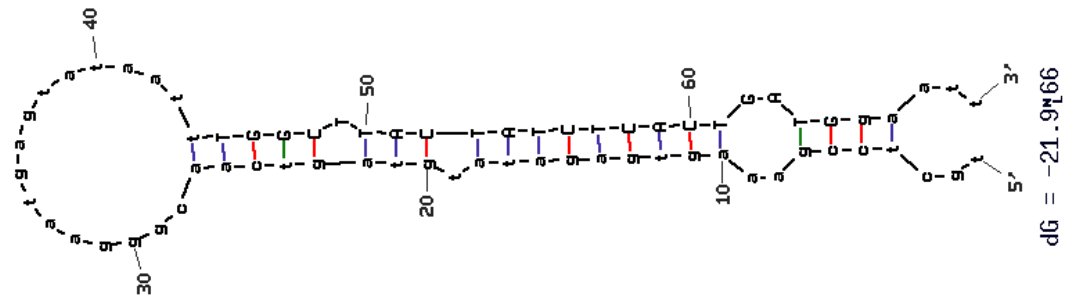

## Pre-miRNA 67

Output of mir\_graph ( )  
by D. Stewart and M. Zuker

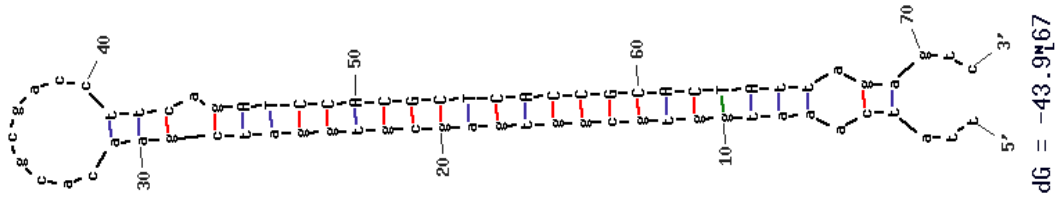

## Pre-miRNA 68

Output of mir\_graph ( )  
by D. Stewart and M. Zuker

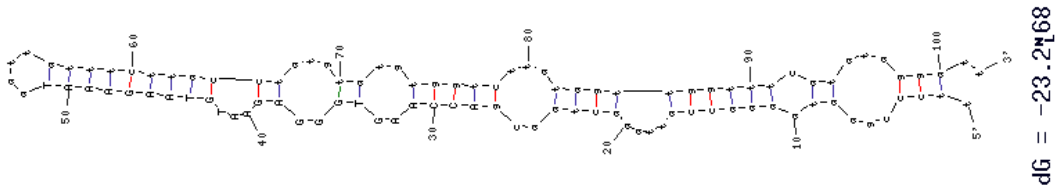



## Pre-miRNA 69

Output of mir\_graph ( )  
by D. Stewart and M. Zuker

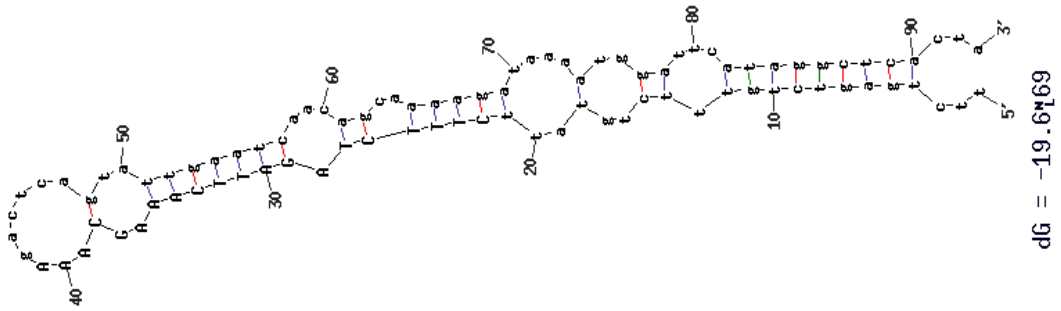

## Pre-miRNA 70

Output of mir\_graph ( )  
by D. Stewart and M. Zuker

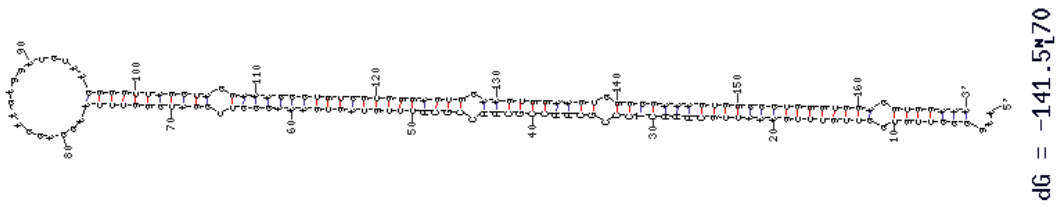

Pre-miRNA 71/ Pre-miRNA 72

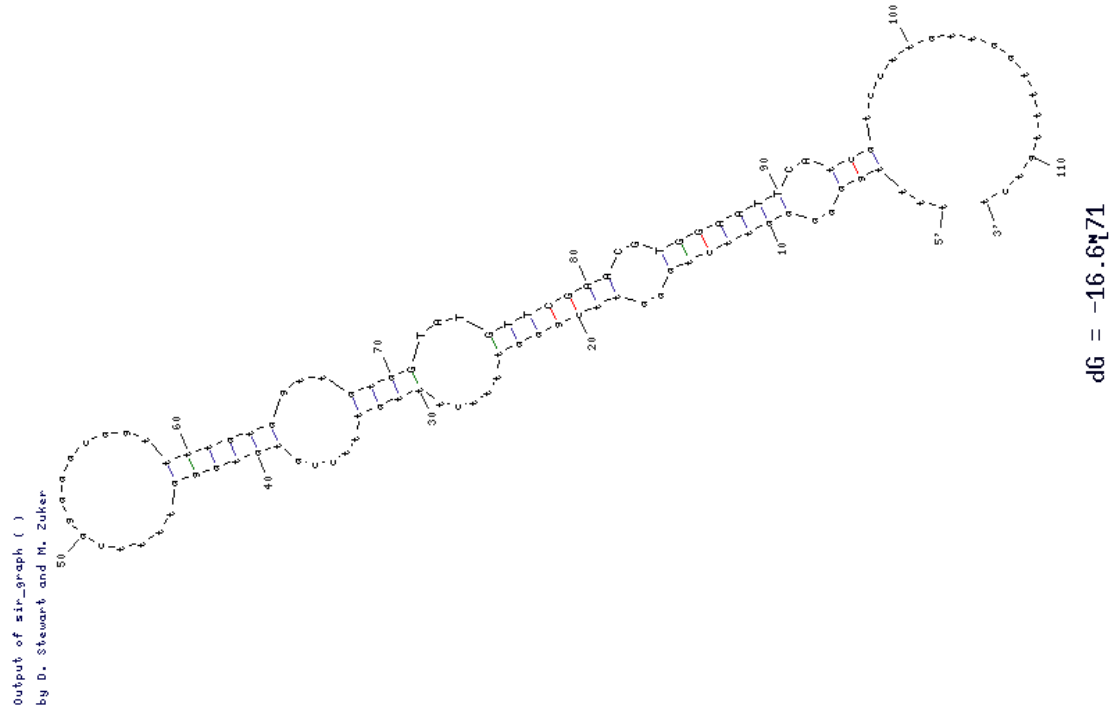

Pre-miRNA 73/ Pre-miRNA 74

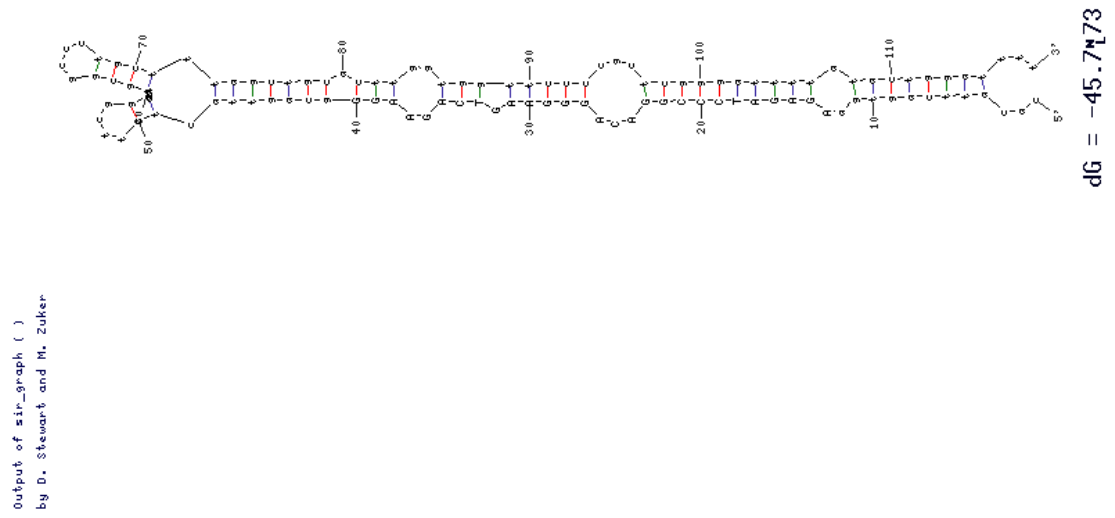

## Pre-miRNA 75

Output of `sir_graph ( )`  
by D. Stewart and M. Zuker

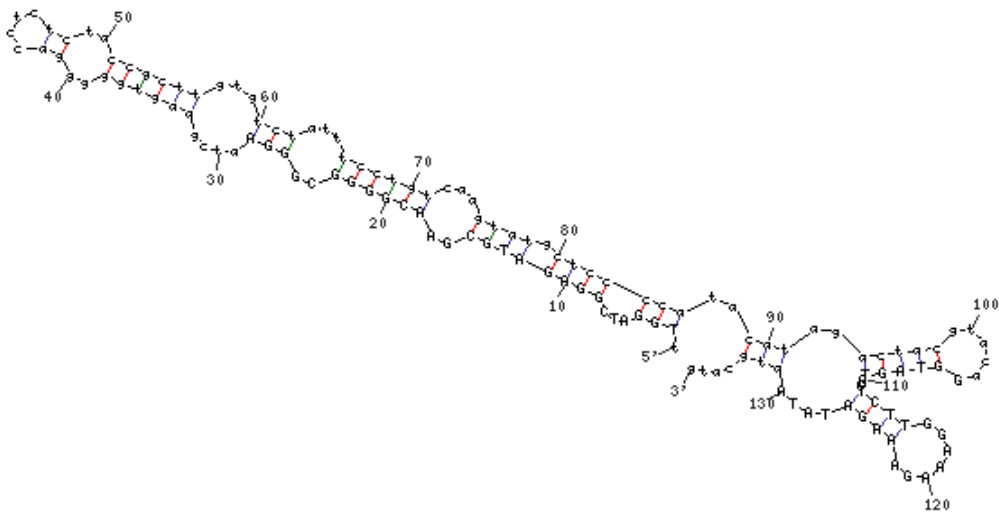

$$\Delta G = -35.8175$$

## Pre-miRNA 76

Output of `mir_graph ( )`  
by D. Stewart and M. Zuker

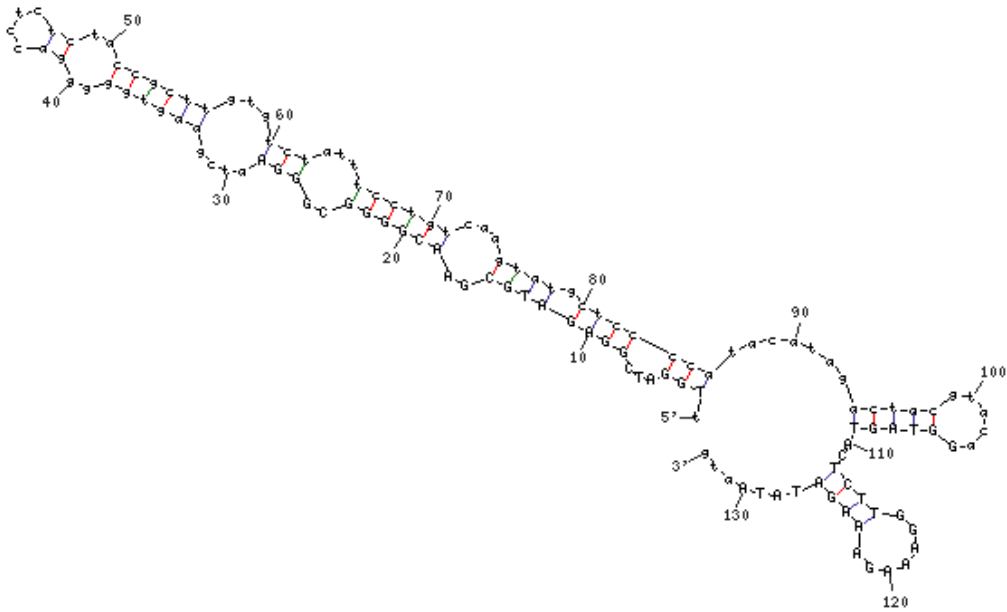

$$\Delta G = -35.6776$$

## Pre-miRNA 77

Output of mir\_graph ( )  
by D. Stewart and M. Zuker

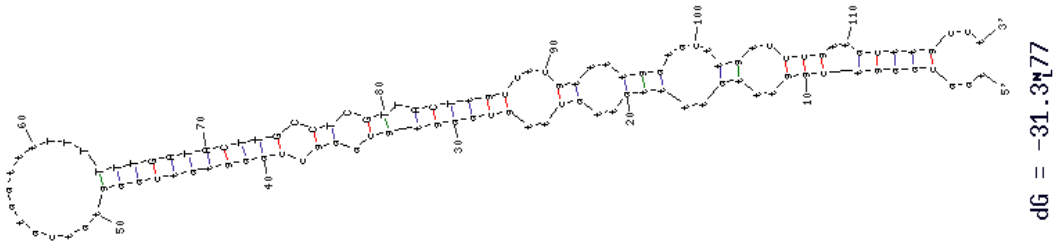

## Pre-miRNA 78

Output of mir\_graph ( )  
by D. Stewart and M. Zuker

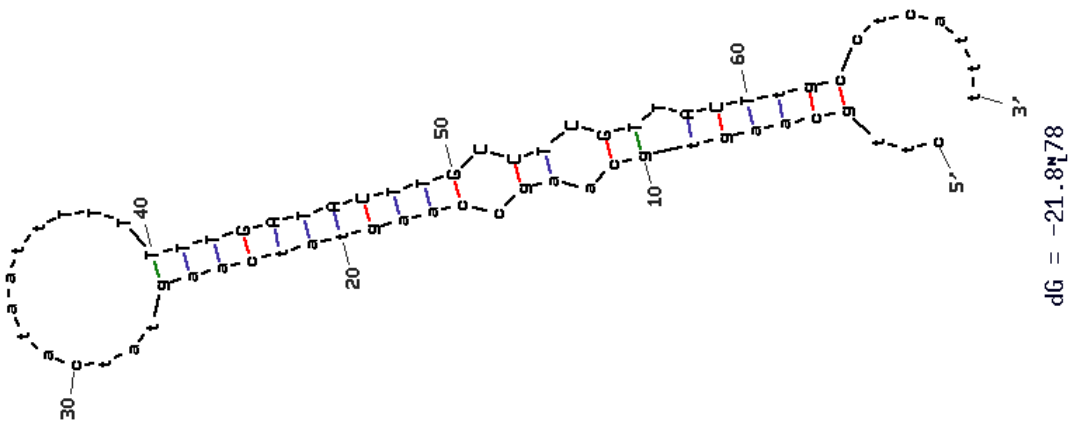

Supplement: 1471-2164-14-9-S2.pdf [file 1471-2164-14-9-S2.pdf]
