# Supplementary material for: Identification of miRNAs and their targets using high-throughput sequencing and degradome analysis in cytoplasmic male-sterile and its maintainer fertile lines of brassica juncea
Source: PubMed Central journal article supplement (PMC3553062; doi:10.1186/1471-2164-14-9), 2013-01-16

# PC-3p-41 slicing AT1G07920.1 at nt 1202

alignment score=3.5 , category=3 , p=0.0894501223743839

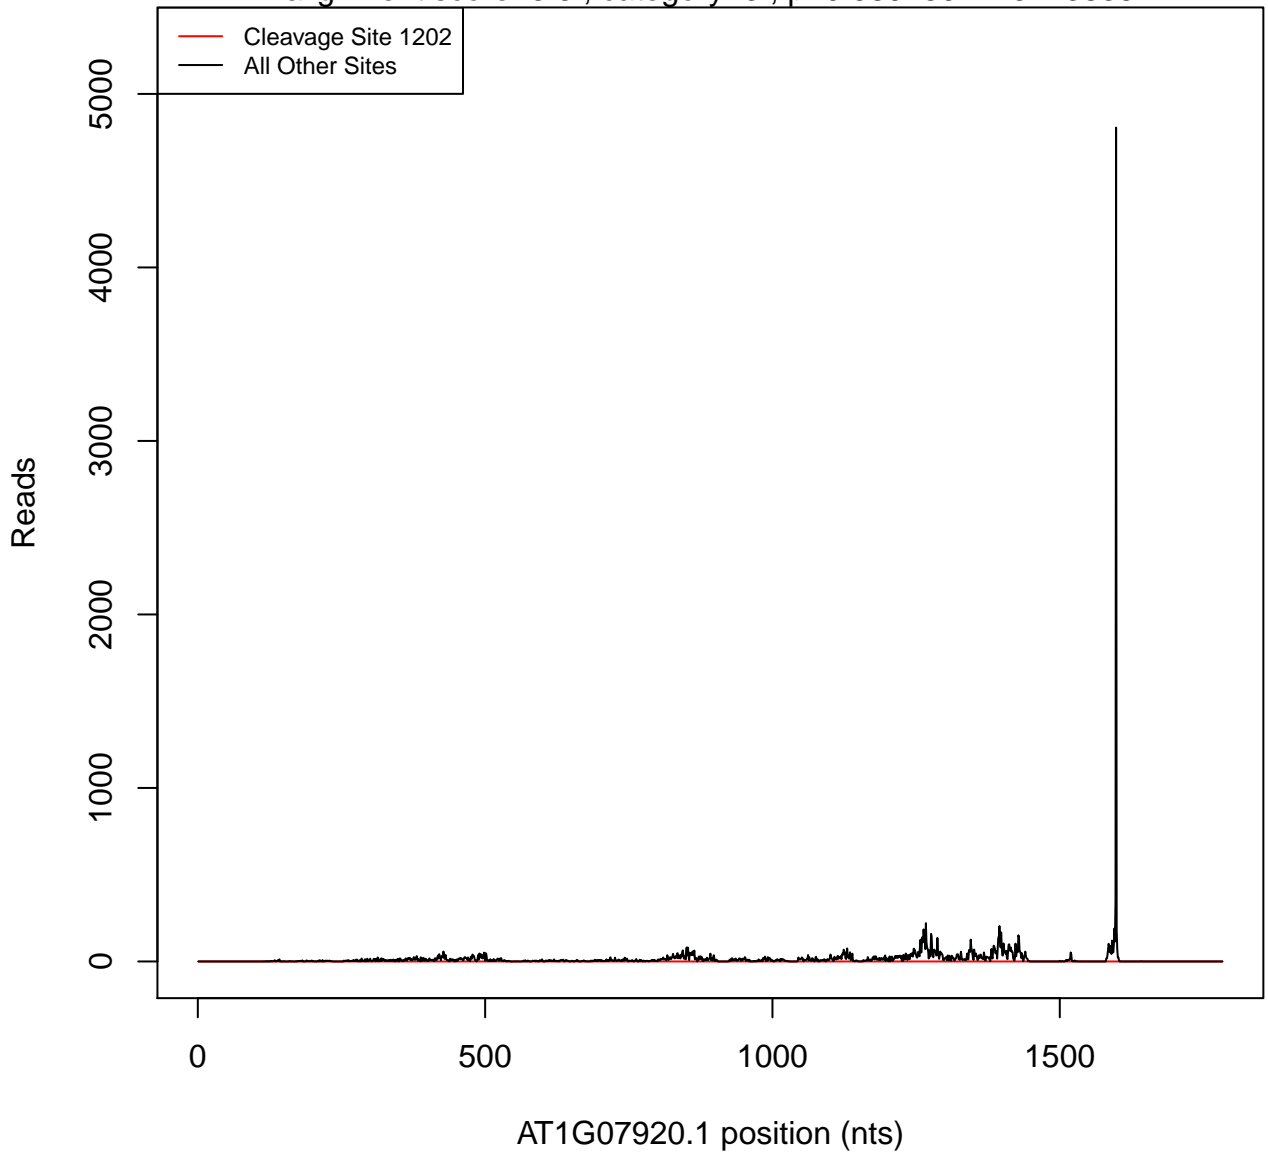

# PC-3p-41 slicing AT1G07930.1 at nt 1214

alignment score=3.5 , category=3 , p=0.0894501223743839

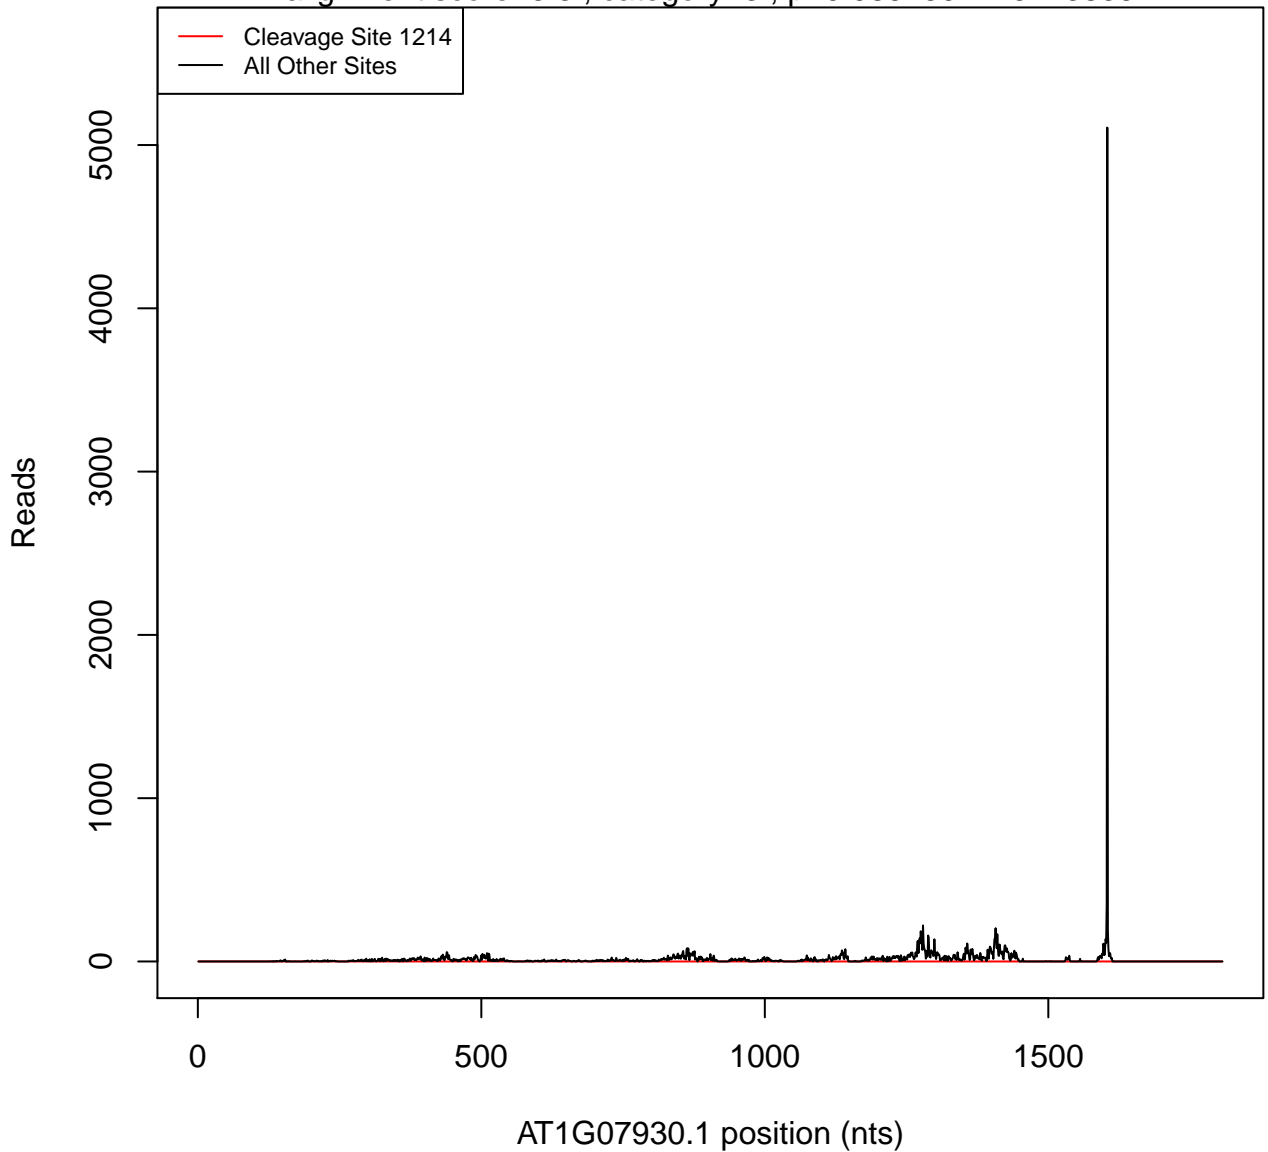

# PC-3p-41 slicing AT1G07930.2 at nt 983

alignment score=3.5 , category=3 , p=0.0894501223743839

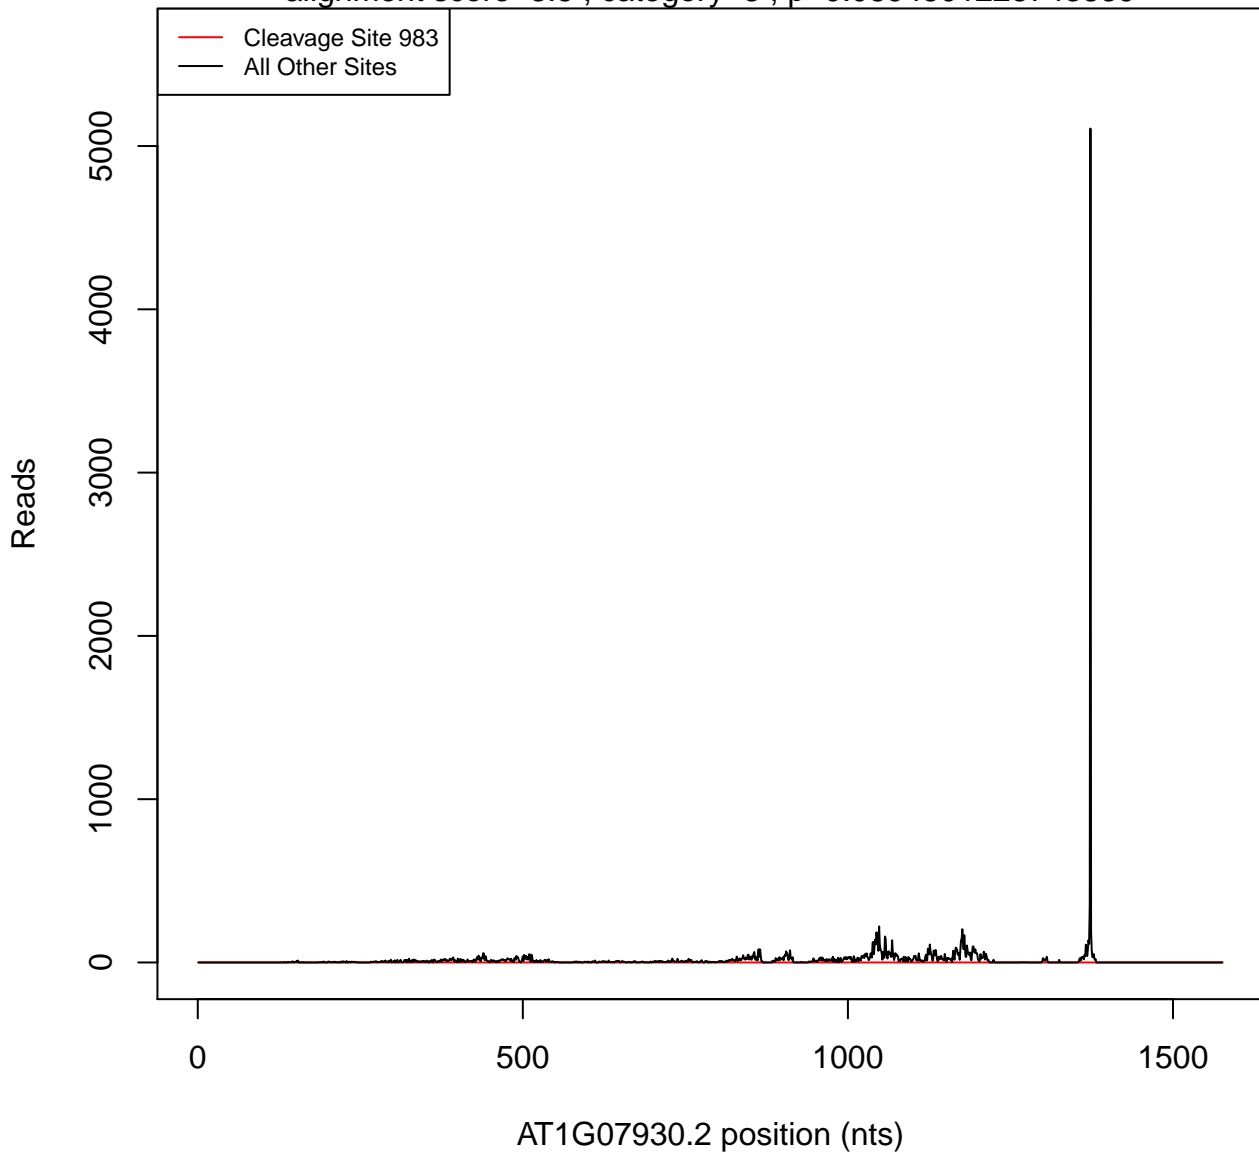

# PC-3p-41 slicing AT1G07940.1 at nt 1206

alignment score=3.5 , category=3 , p=0.0894501223743839

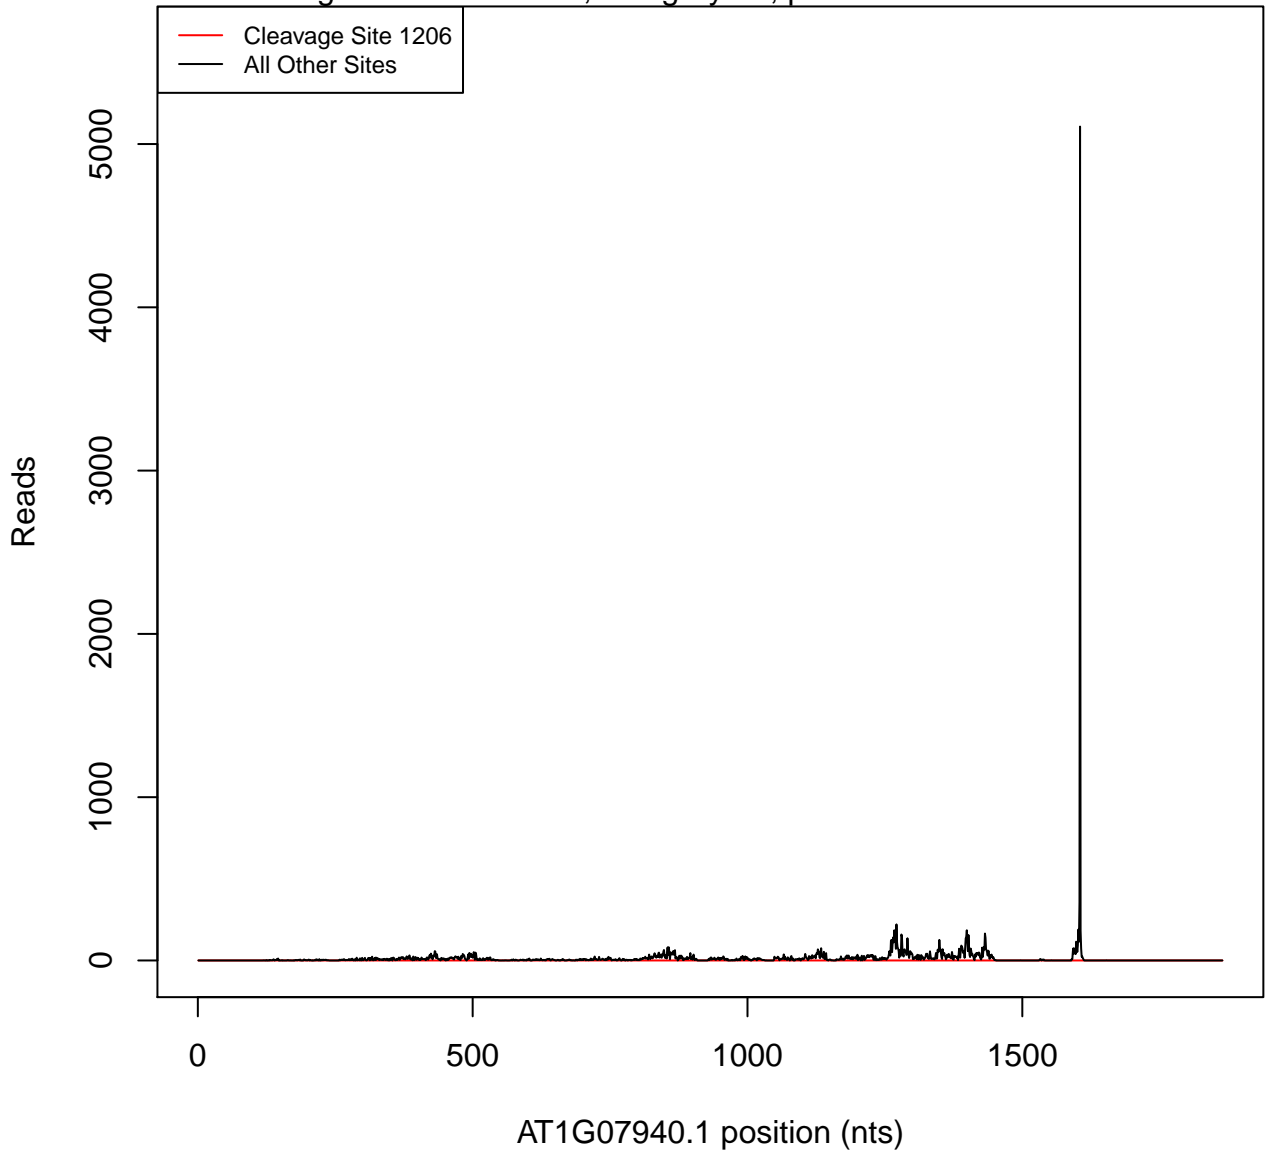

# PC-3p-41 slicing AT1G07940.2 at nt 1333

alignment score=3.5 , category=3 , p=0.0894501223743839

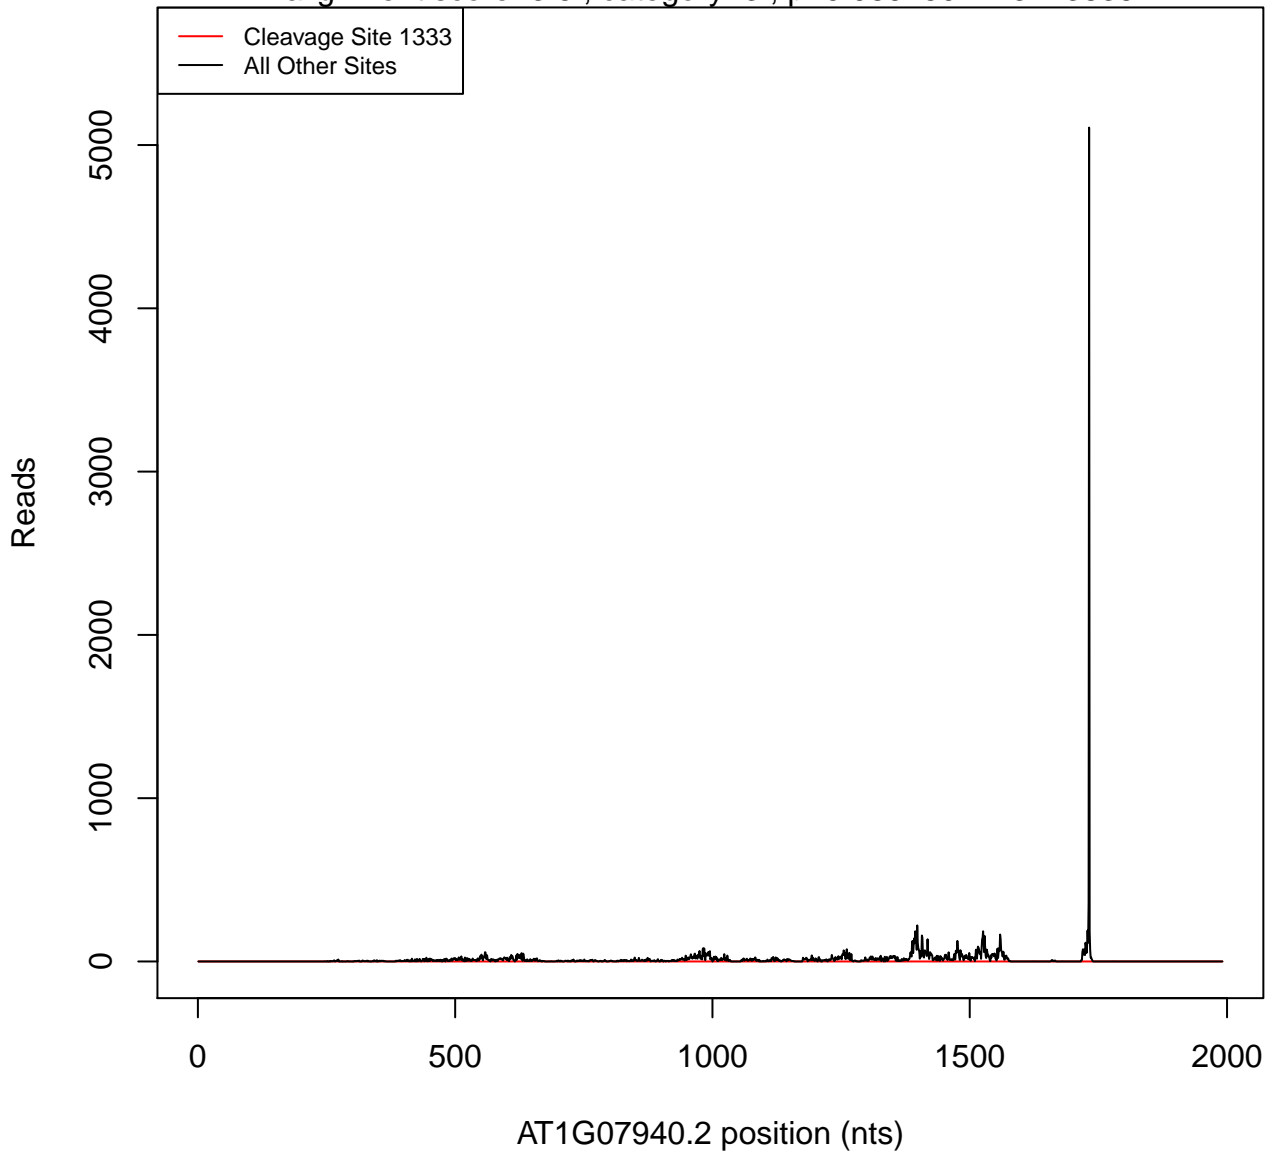

# ath-miR393a slicing AT1G12820.1 at nt 1895

alignment score=2 , category=0 , p=0.0120908243663383

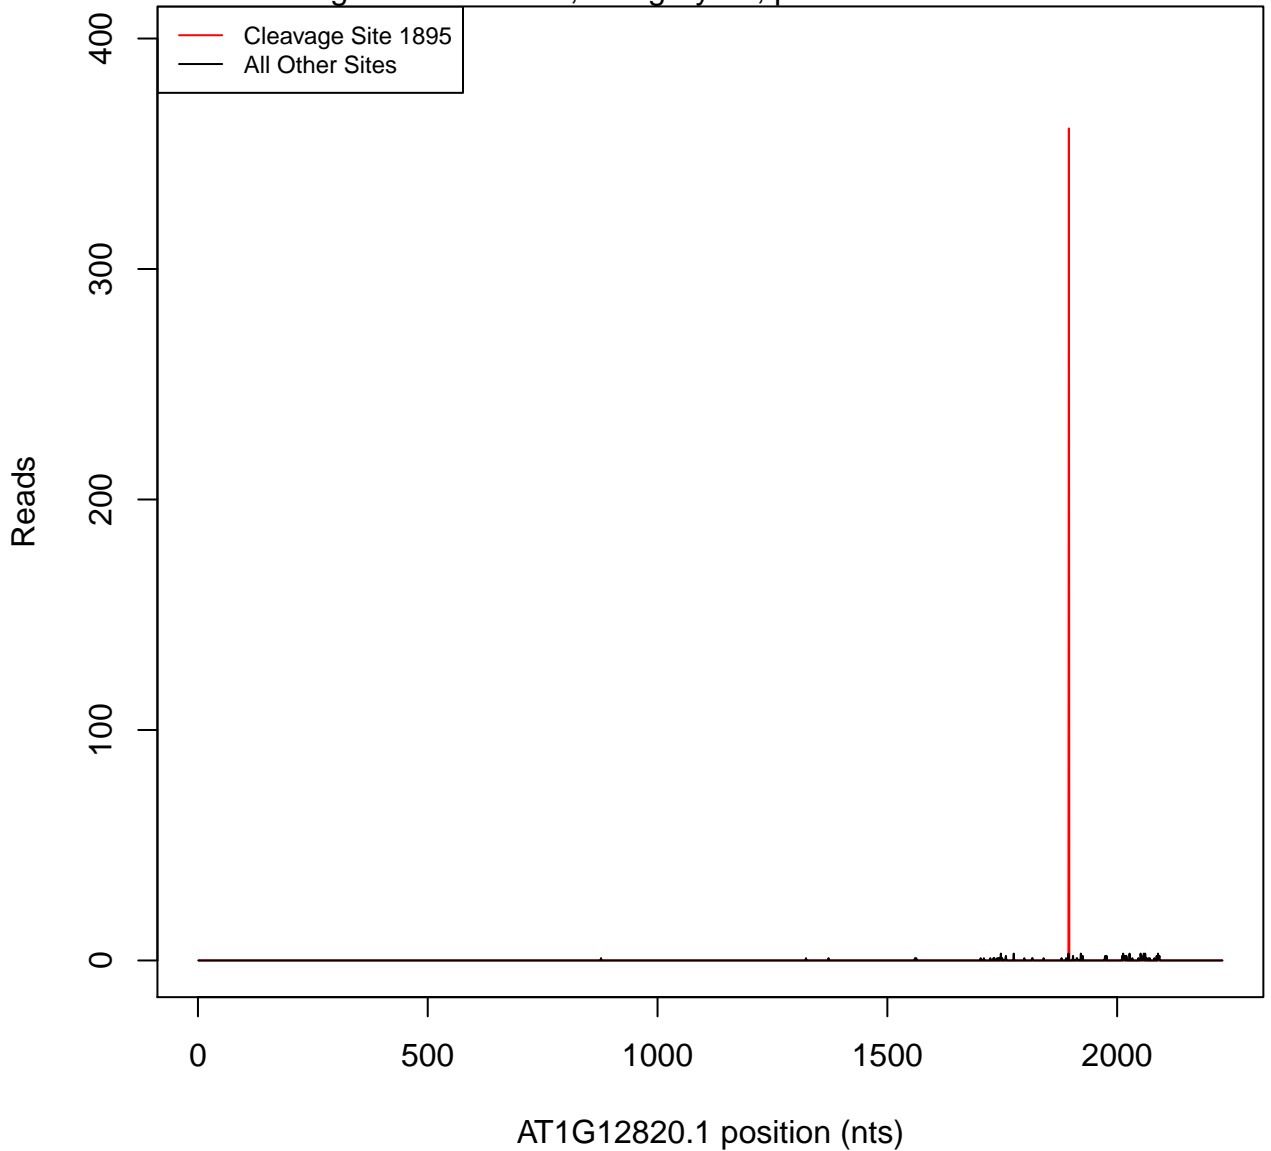

# ath-miR393b slicing AT1G12820.1 at nt 1895

alignment score=2 , category=0 , p=0.0120908243663383

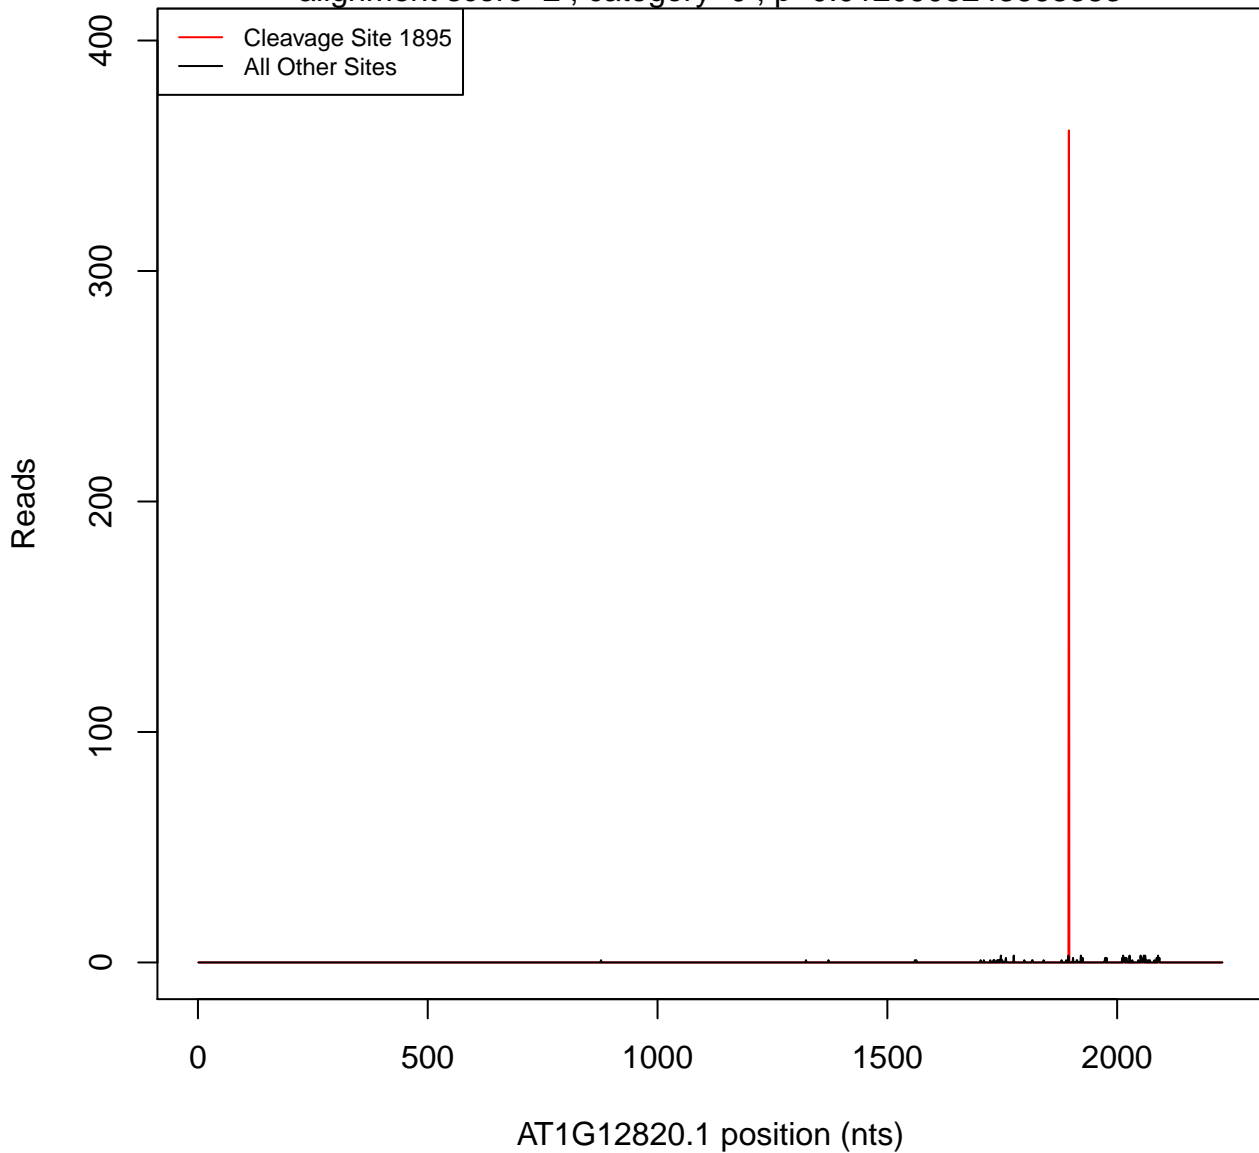

# ath-miR394a slicing AT1G27340.1 at nt 1383

alignment score=1 , category=0 , p=0.00358760974080163

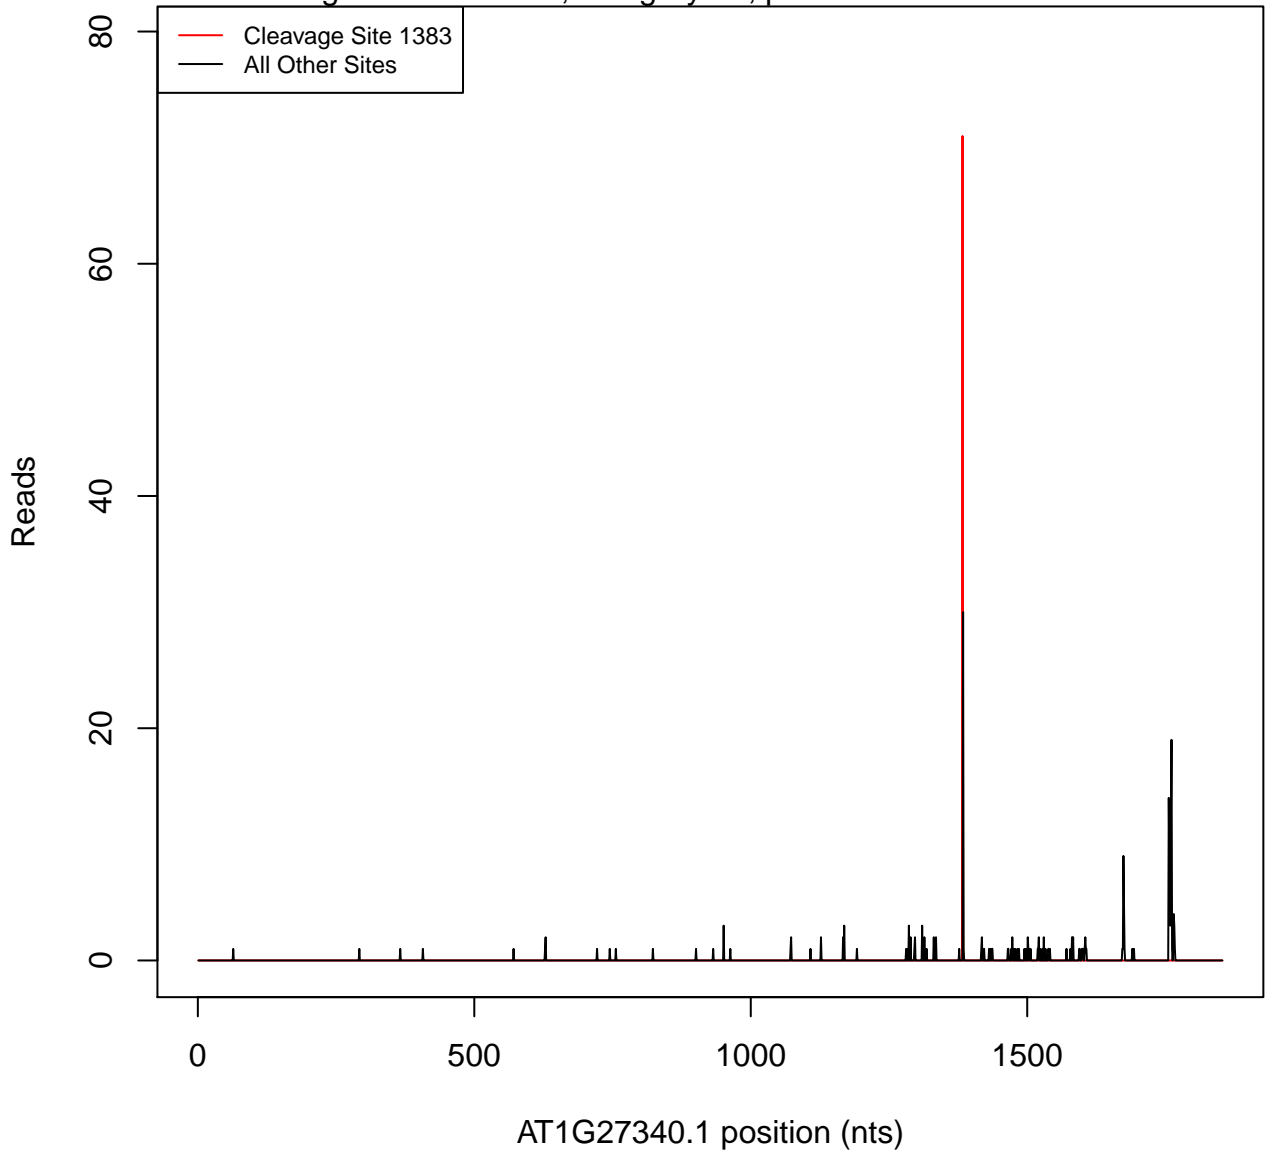



# ath-miR394b slicing AT1G27340.1 at nt 1383

alignment score=1 , category=0 , p=0.00358760974080163

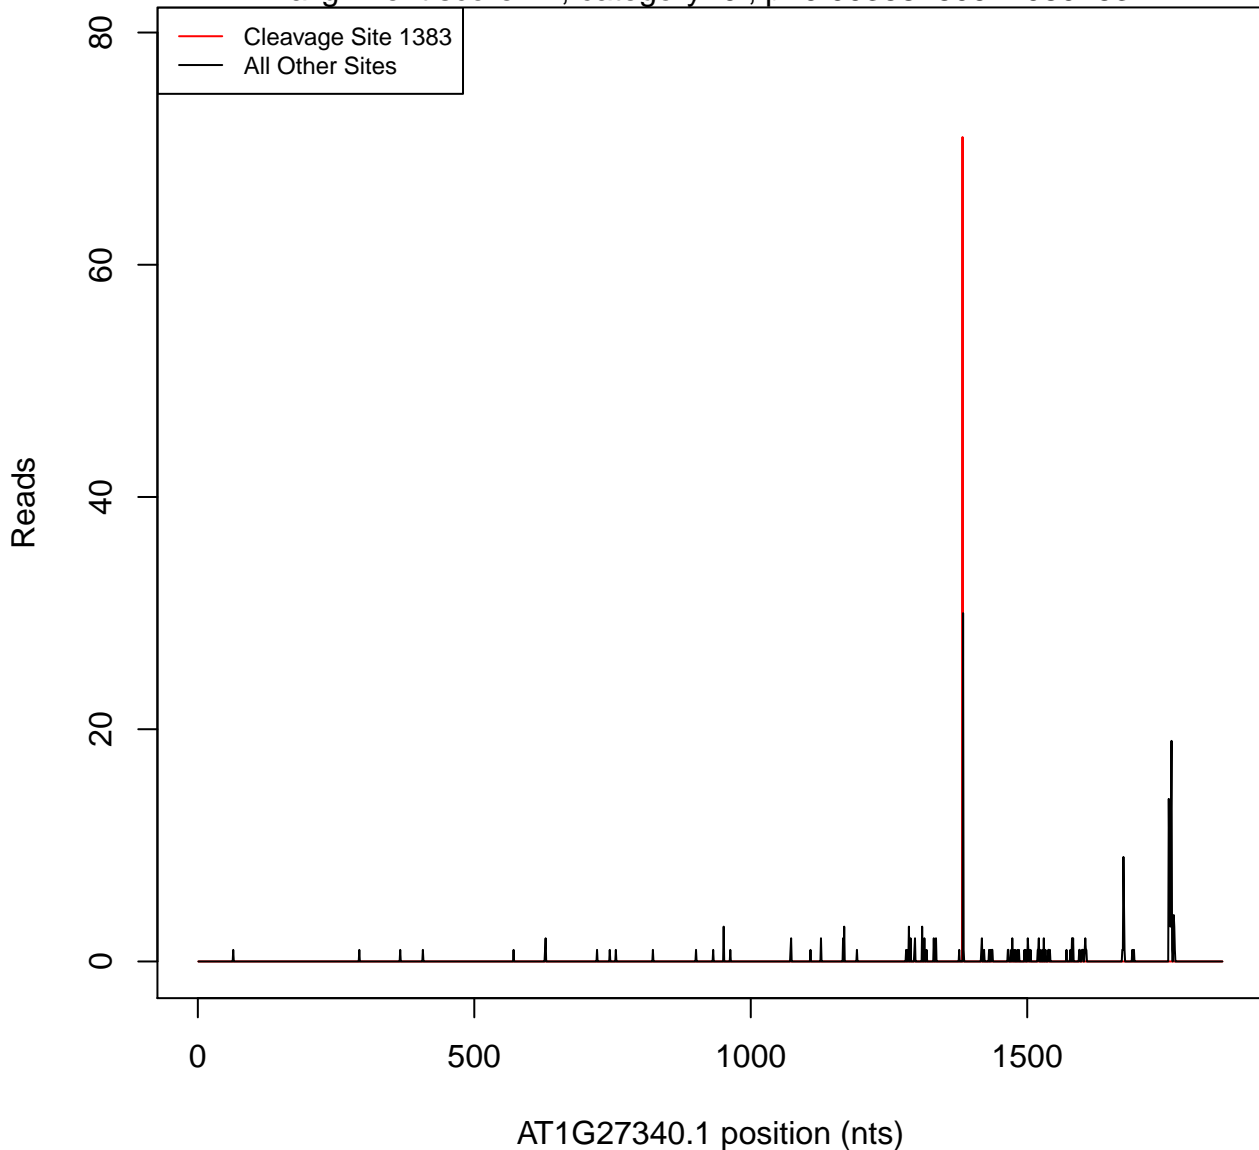

# ath-miR156a slicing AT1G27360.1 at nt 1263

alignment score=1 , category=0 , p=0.0592699262622588

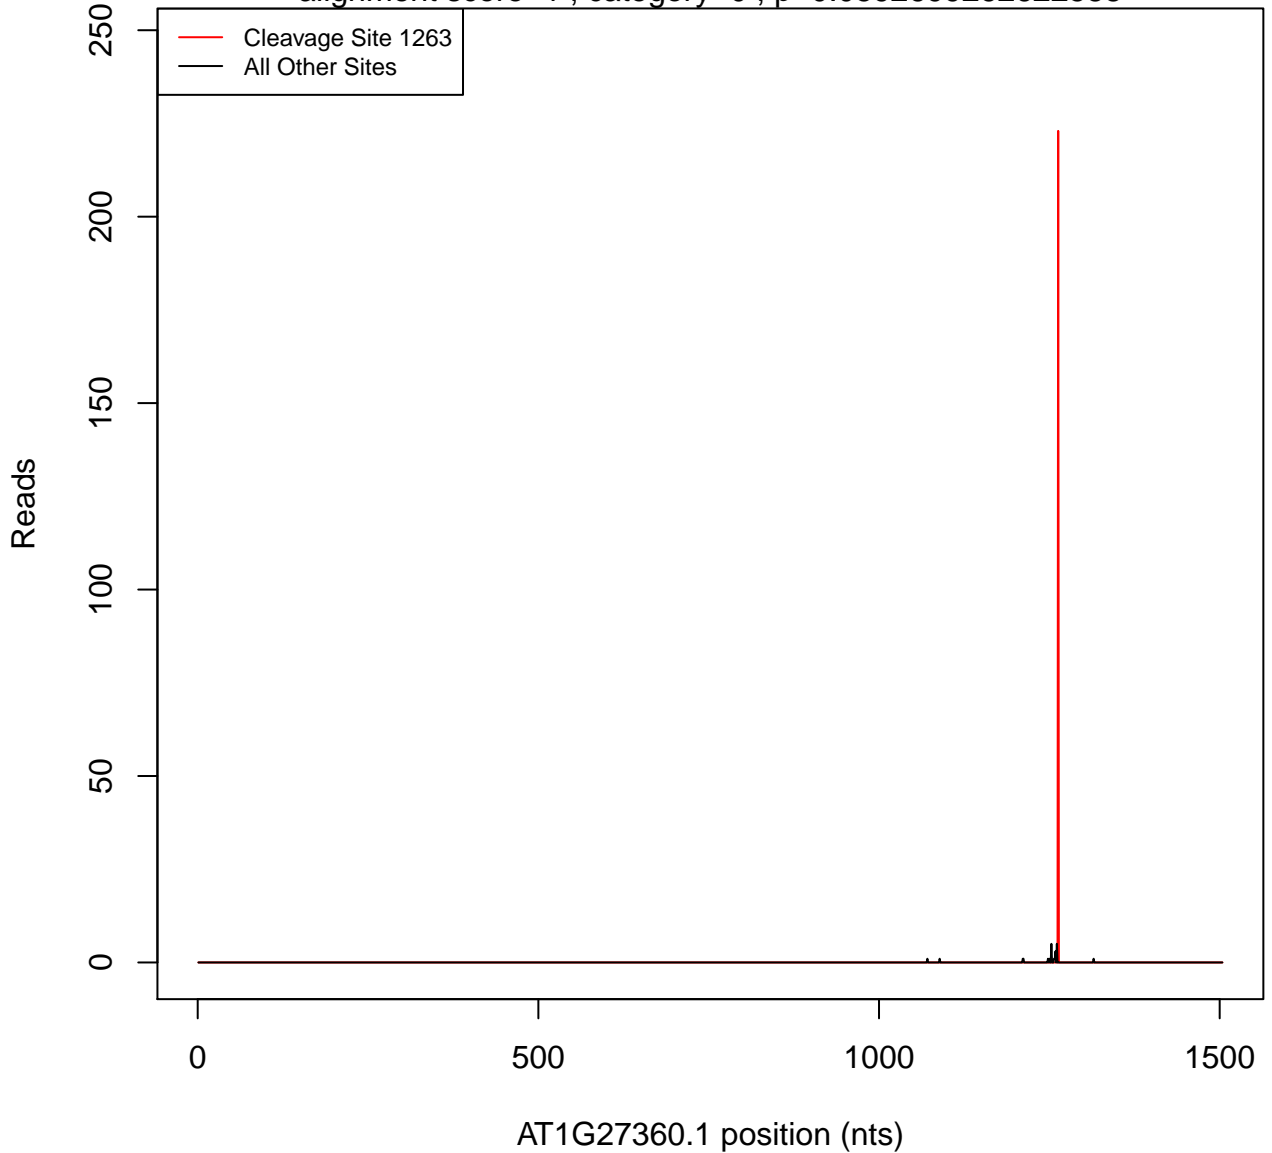

# ath-miR156b slicing AT1G27360.1 at nt 1263

alignment score=1 , category=0 , p=0.0592699262622588

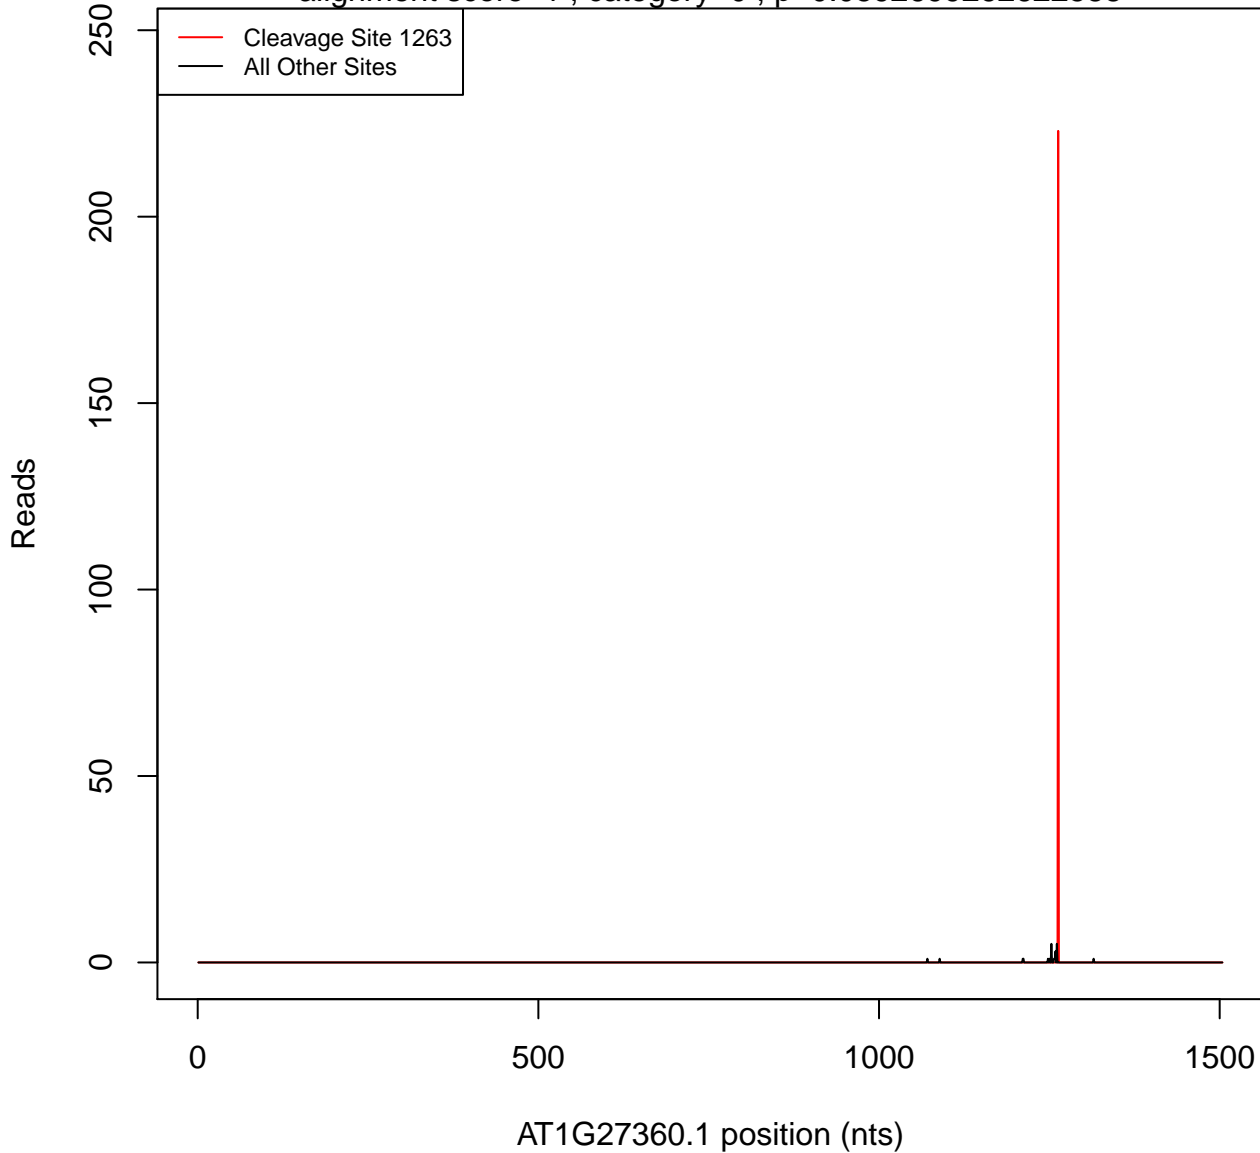

# ath-miR156c slicing AT1G27360.1 at nt 1263

alignment score=1 , category=0 , p=0.0592699262622588

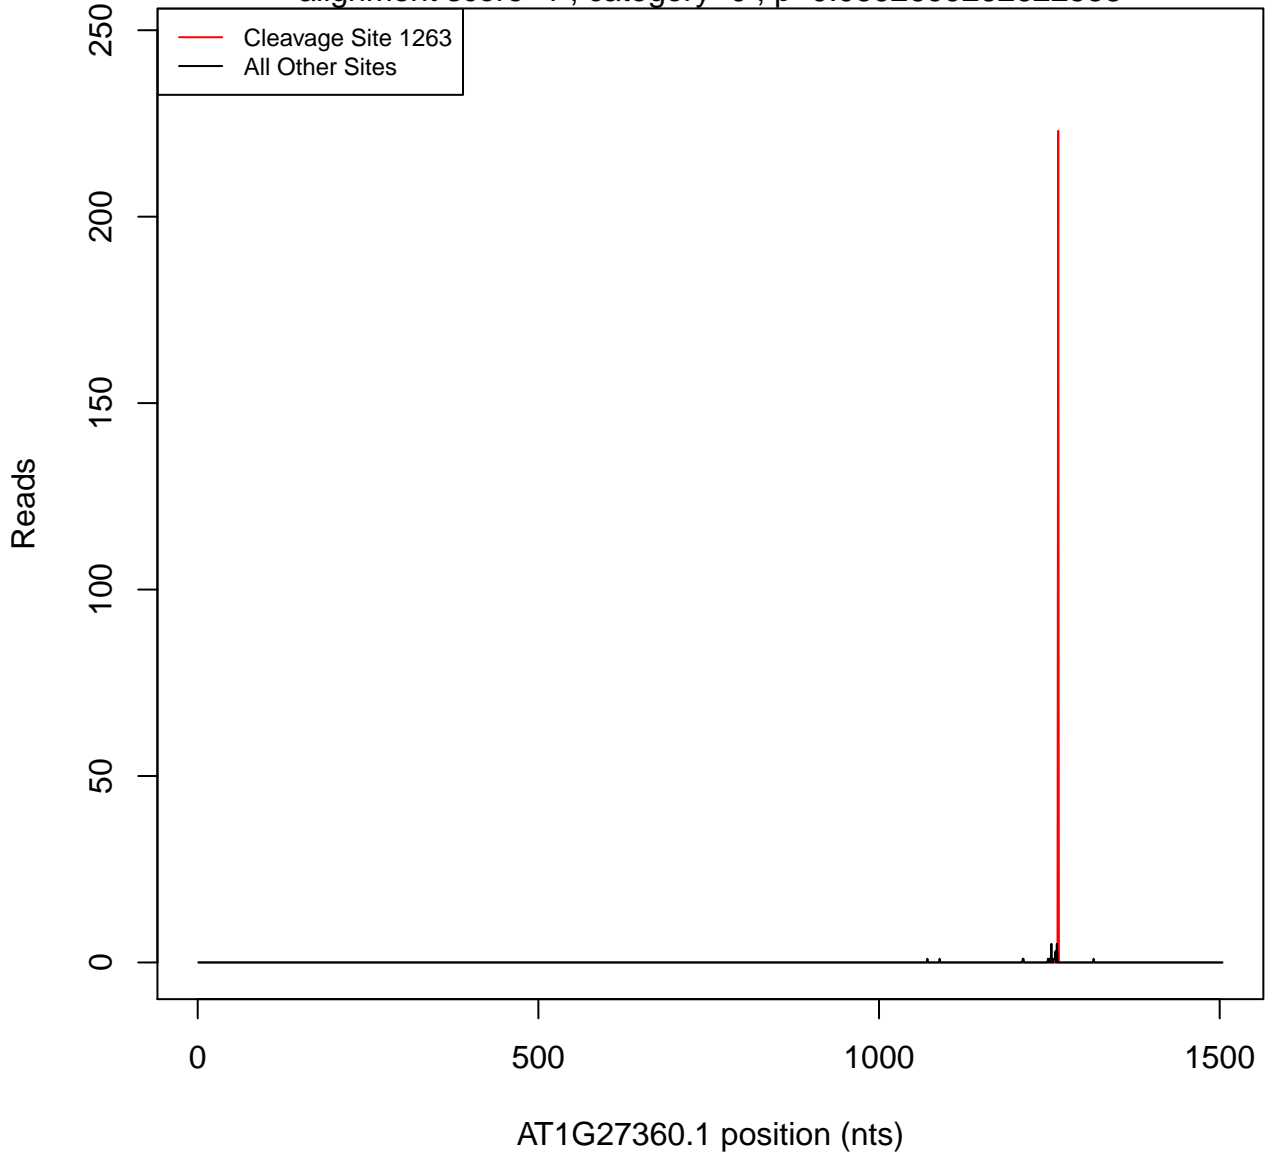

# ath-miR156d slicing AT1G27360.1 at nt 1263

alignment score=1 , category=0 , p=0.0592699262622588

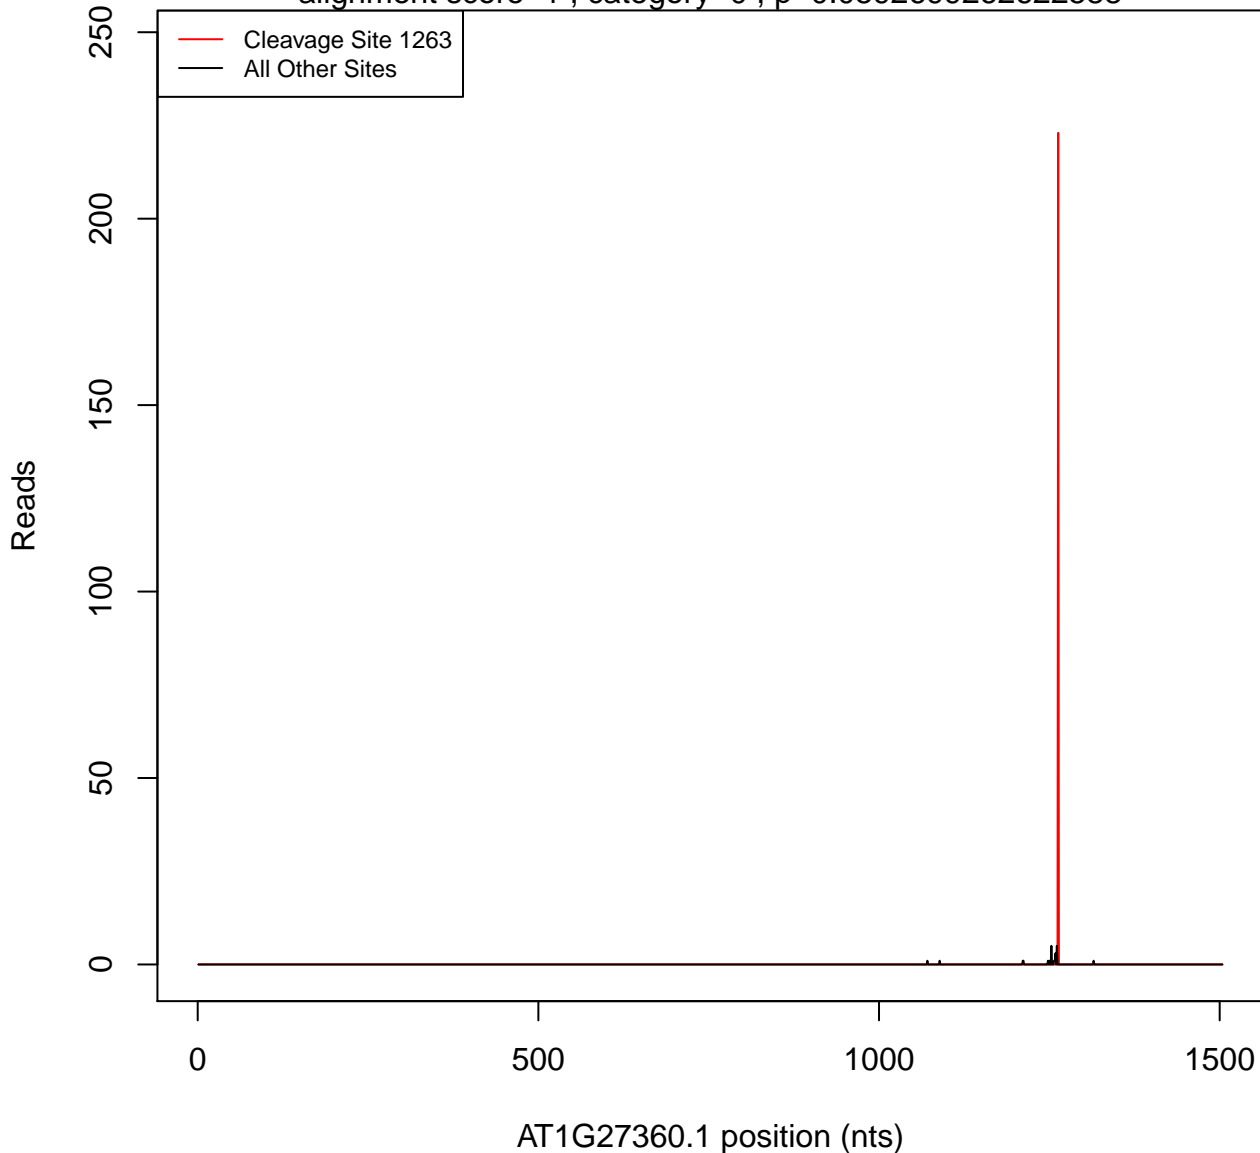

# ath-miR156e slicing AT1G27360.1 at nt 1263

alignment score=1 , category=0 , p=0.0592699262622588



# ath-miR156f slicing AT1G27360.1 at nt 1263

alignment score=1 , category=0 , p=0.0592699262622588

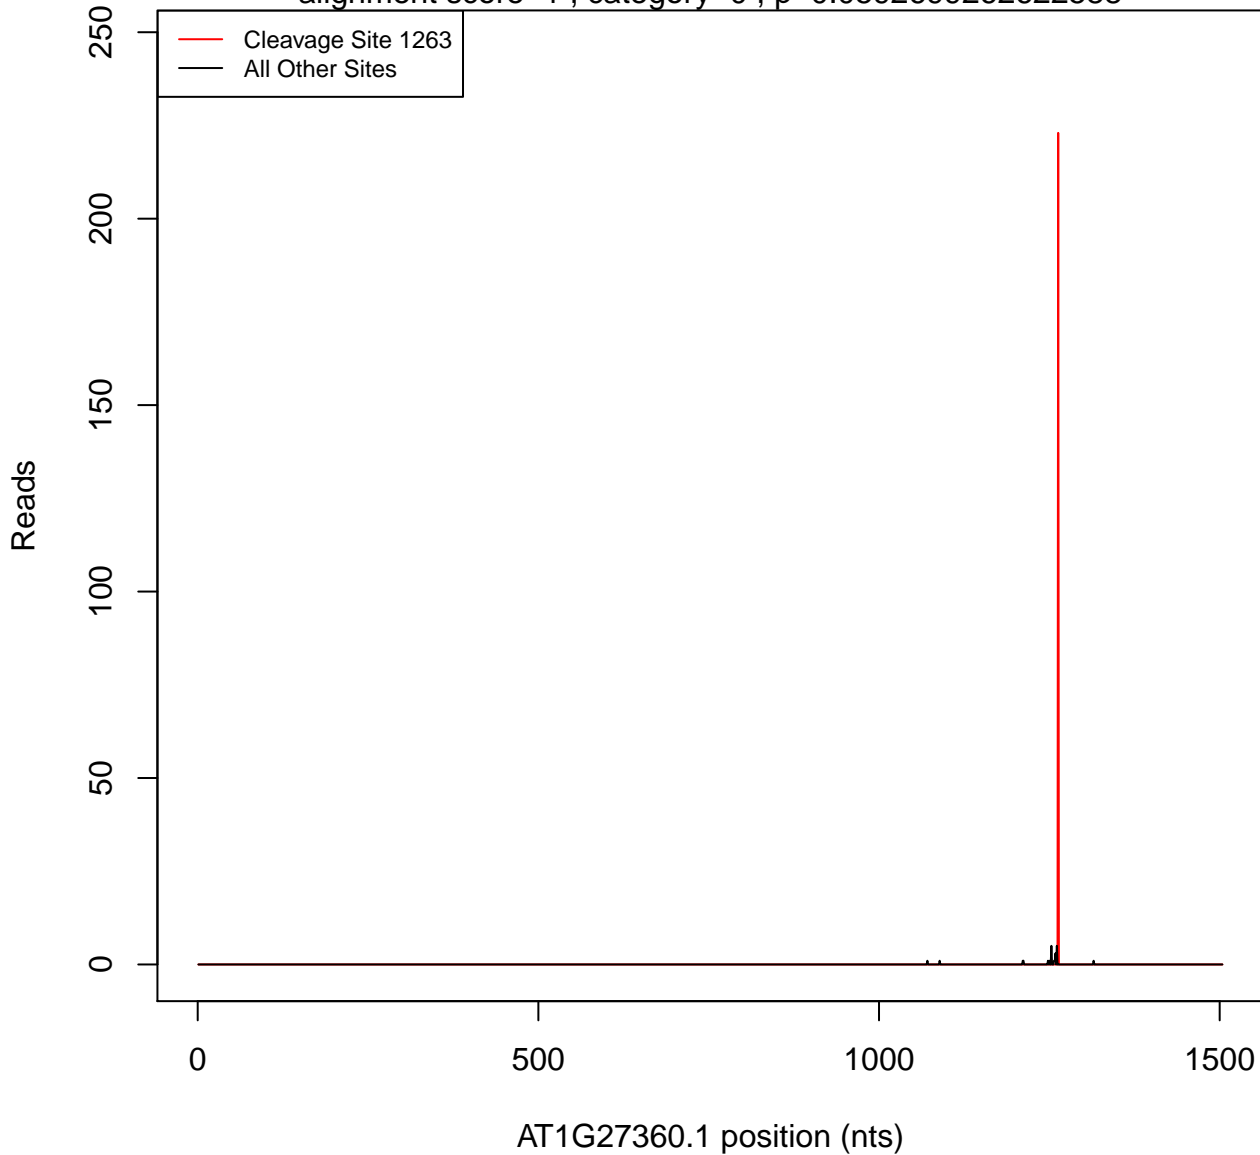

# ath-miR156g slicing AT1G27360.1 at nt 1263

alignment score=2 , category=0 , p=0.0503855131498749

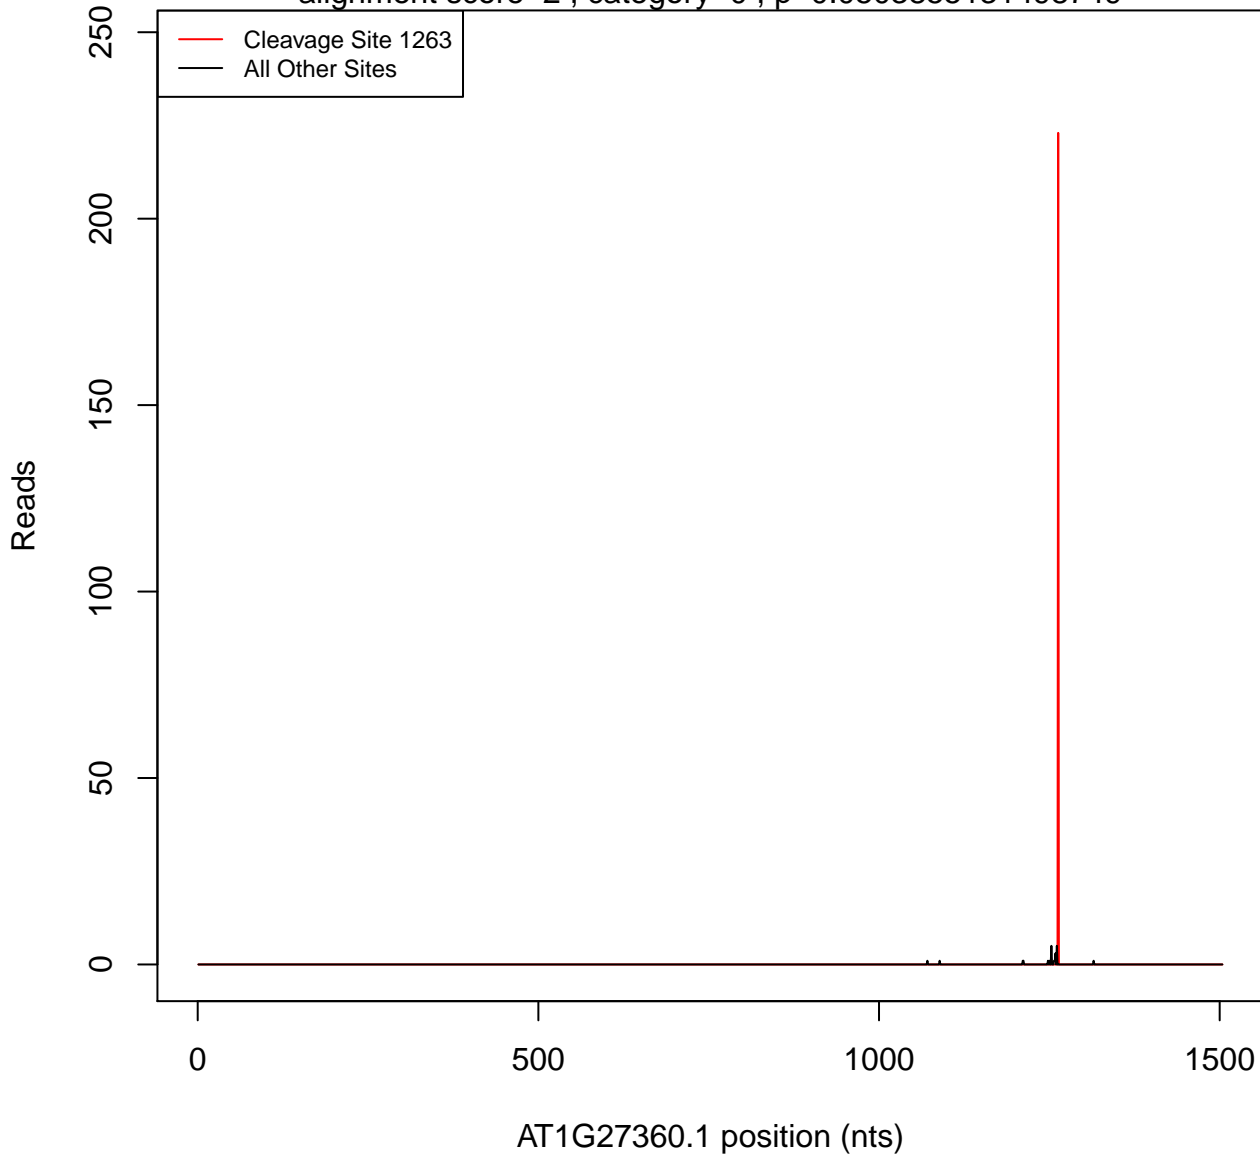



# ath-miR156h slicing AT1G27360.1 at nt 1263

alignment score=2 , category=0 , p=0.0561437826265823

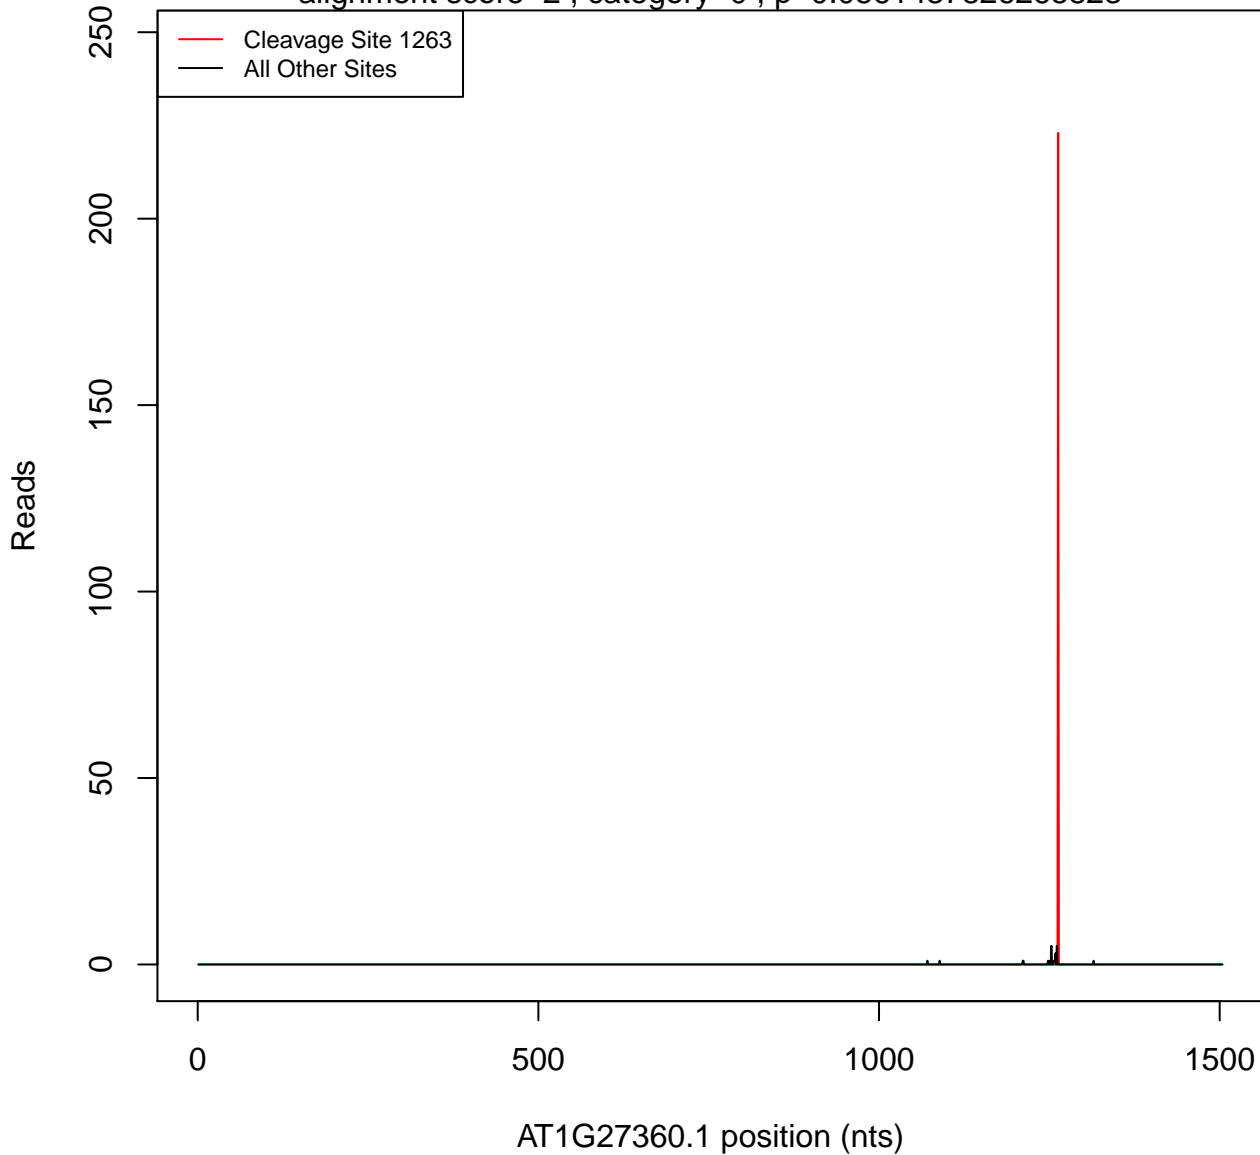

# ath-miR156i slicing AT1G27360.1 at nt 1263

alignment score=1 , category=0 , p=0.0626448986382654

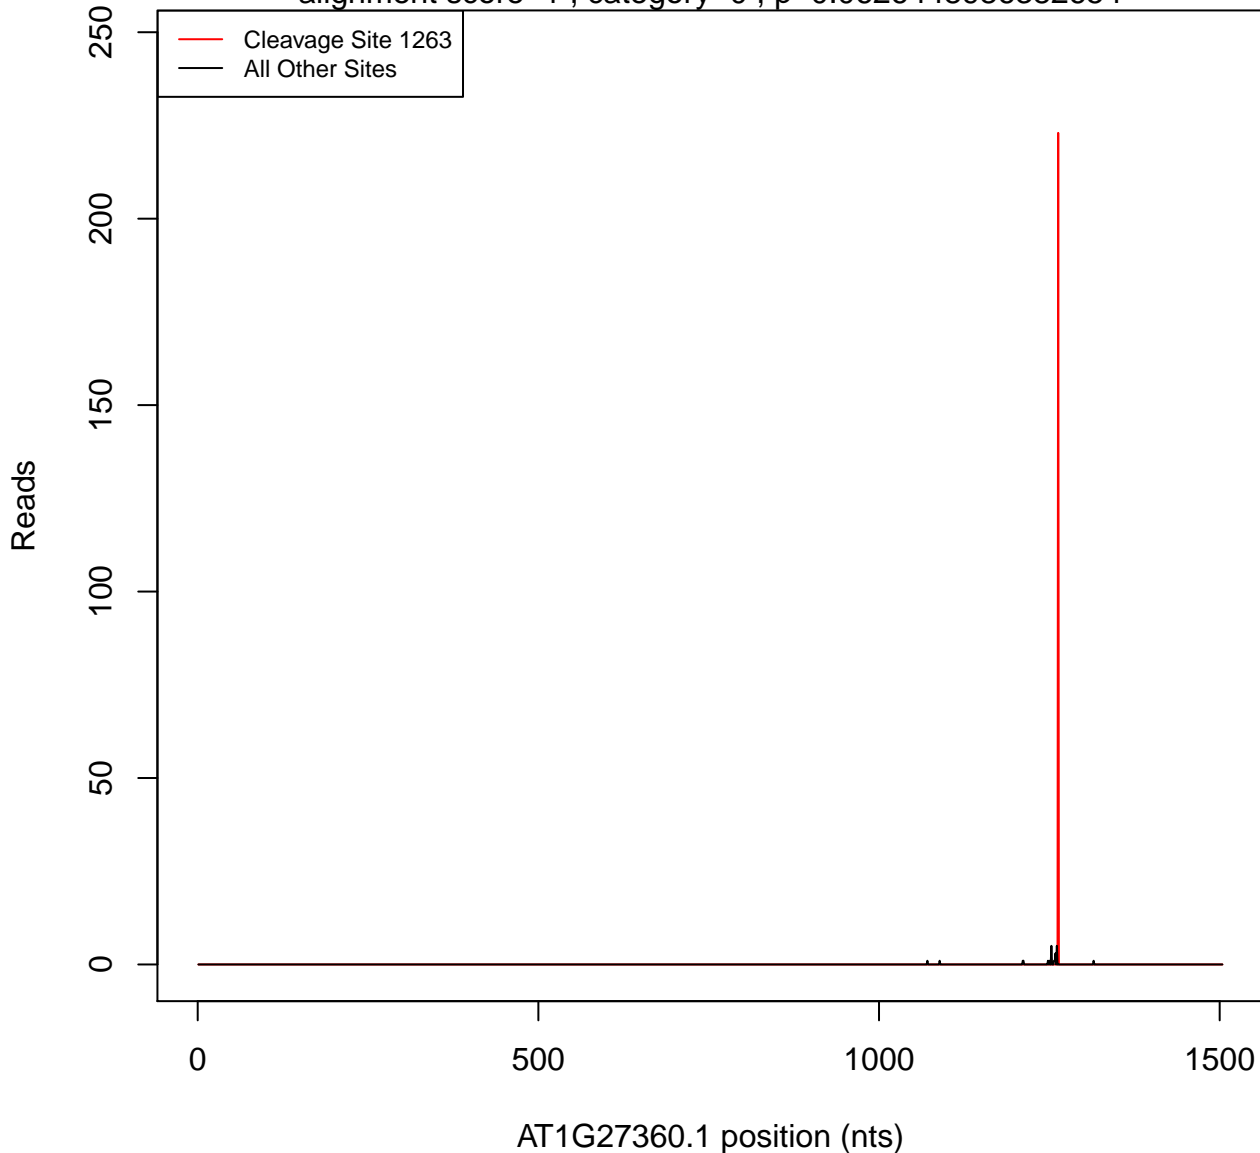

# ath-miR156j slicing AT1G27360.1 at nt 1263

alignment score=0 , category=0 , p=0.0680712184898578

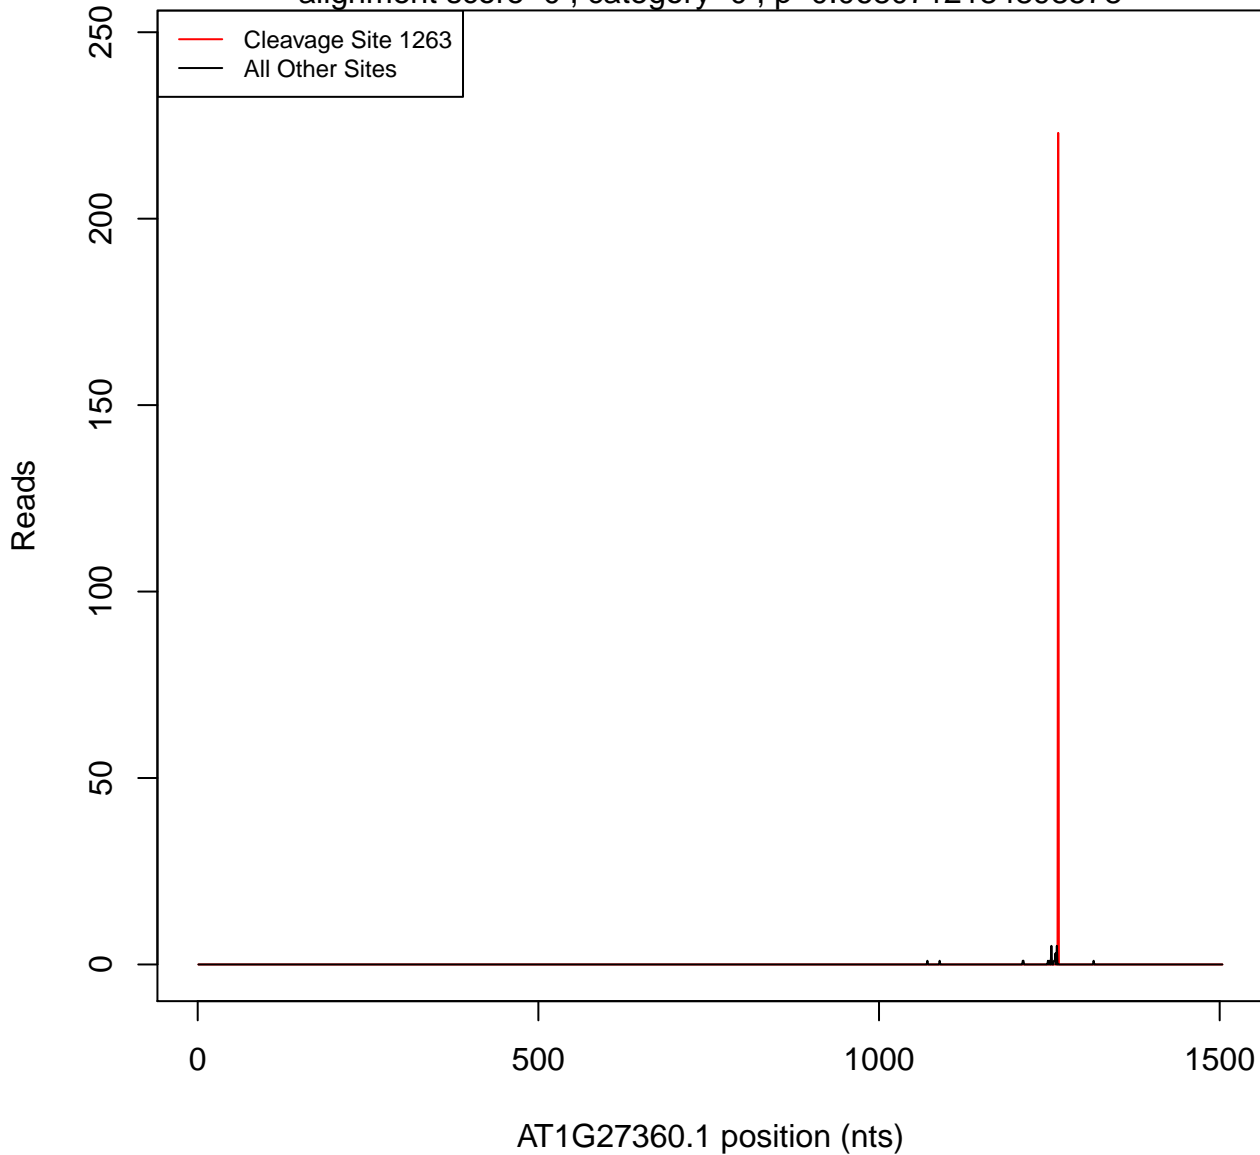

# ath-miR157d slicing AT1G27360.1 at nt 1263

alignment score=2 , category=0 , p=0.0561437826265823

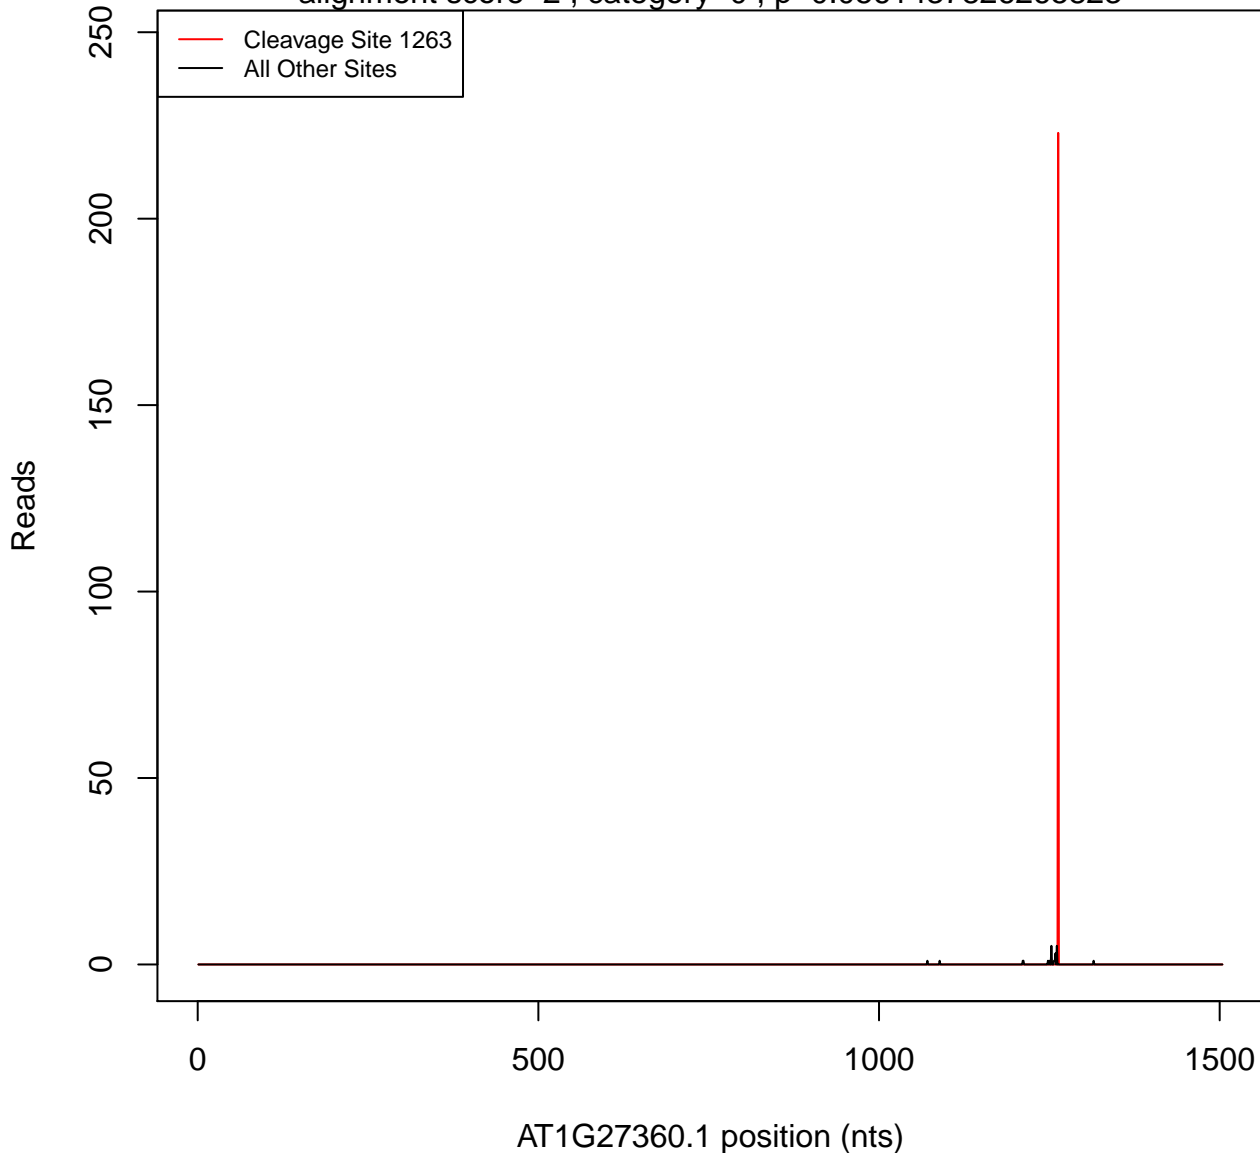

# ath-miR156a slicing AT1G27360.2 at nt 1223

alignment score=1 , category=0 , p=0.0592699262622588

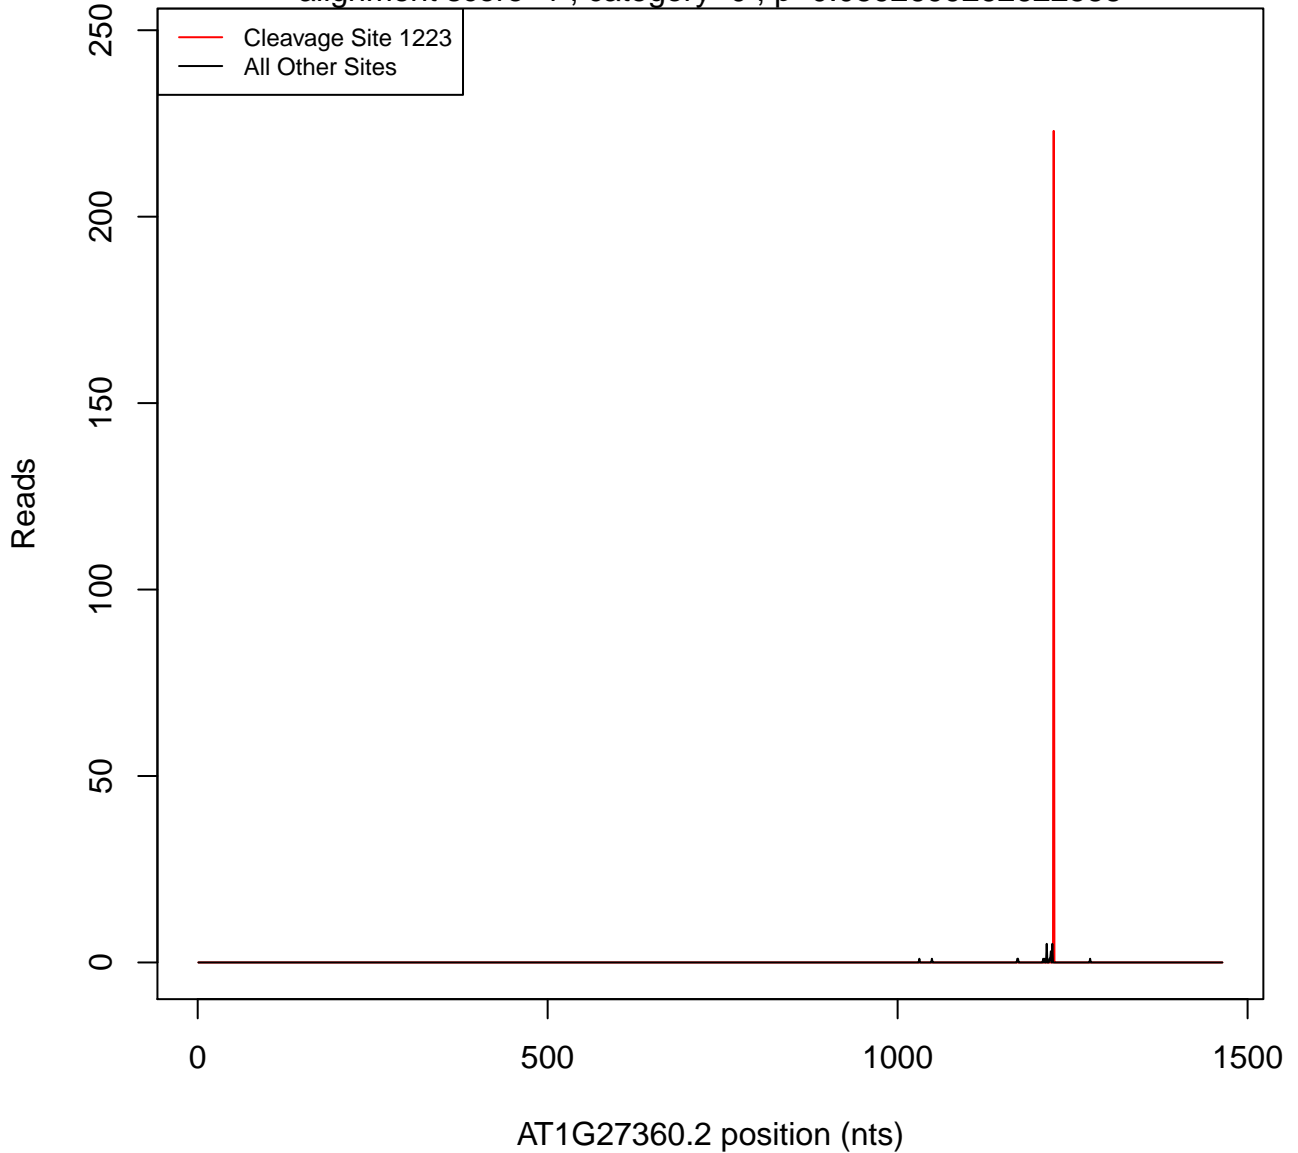

# ath-miR156b slicing AT1G27360.2 at nt 1223

alignment score=1 , category=0 , p=0.0592699262622588

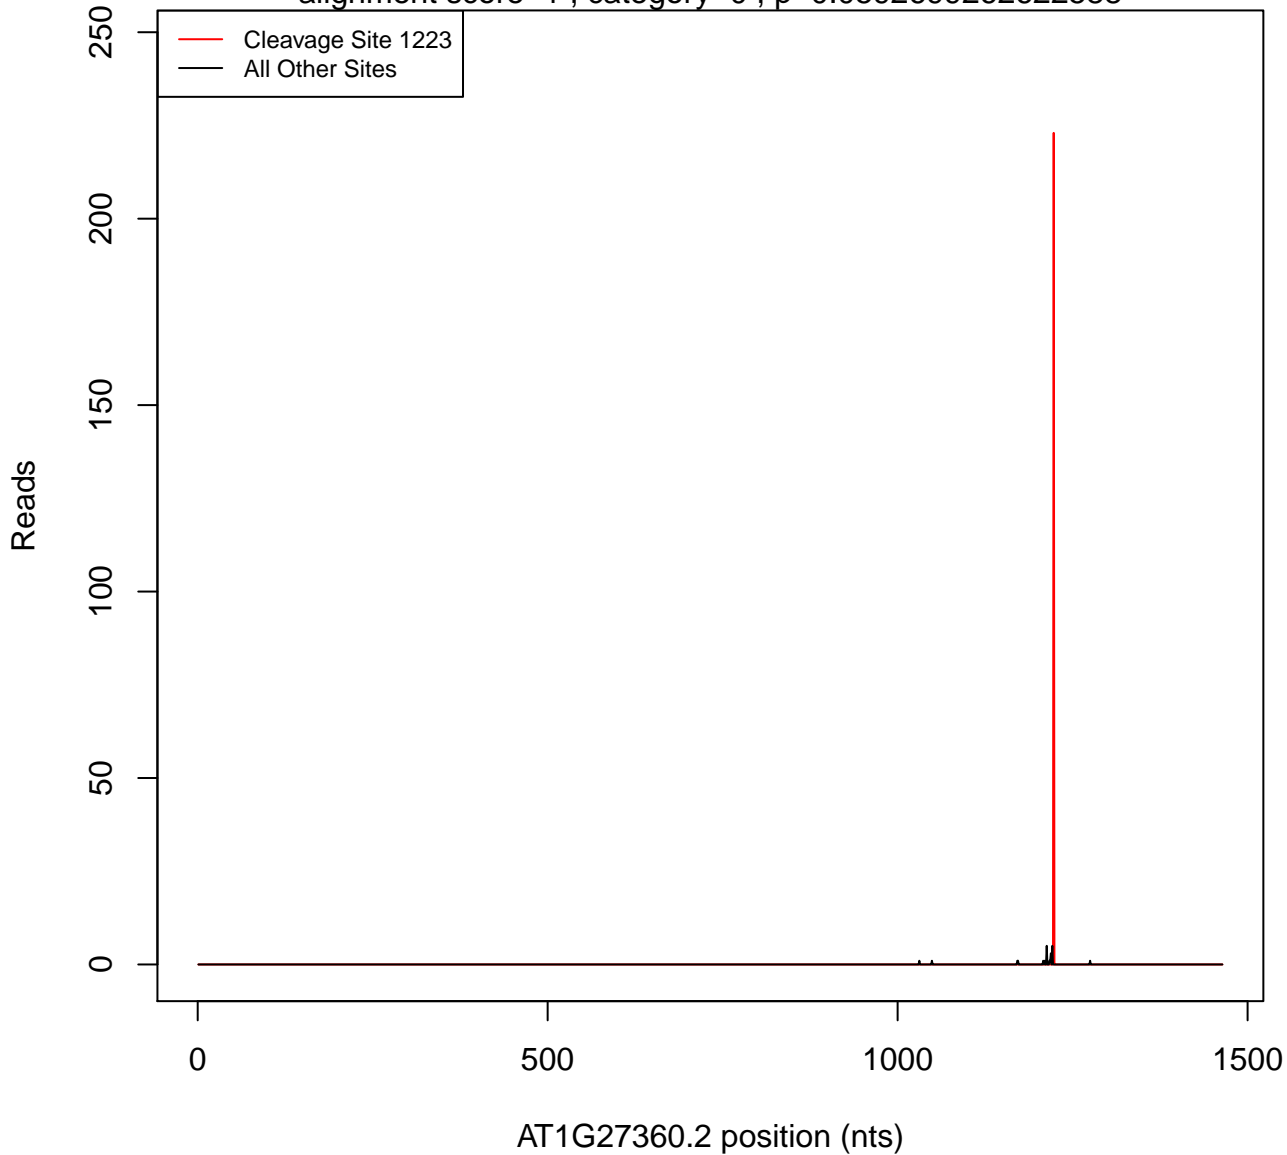

# ath-miR156c slicing AT1G27360.2 at nt 1223

alignment score=1 , category=0 , p=0.0592699262622588



# ath-miR156d slicing AT1G27360.2 at nt 1223

alignment score=1 , category=0 , p=0.0592699262622588





# ath-miR156e slicing AT1G27360.2 at nt 1223

alignment score=1 , category=0 , p=0.0592699262622588



# ath-miR156f slicing AT1G27360.2 at nt 1223

alignment score=1 , category=0 , p=0.0592699262622588



# ath-miR156g slicing AT1G27360.2 at nt 1223

alignment score=2 , category=0 , p=0.0503855131498749

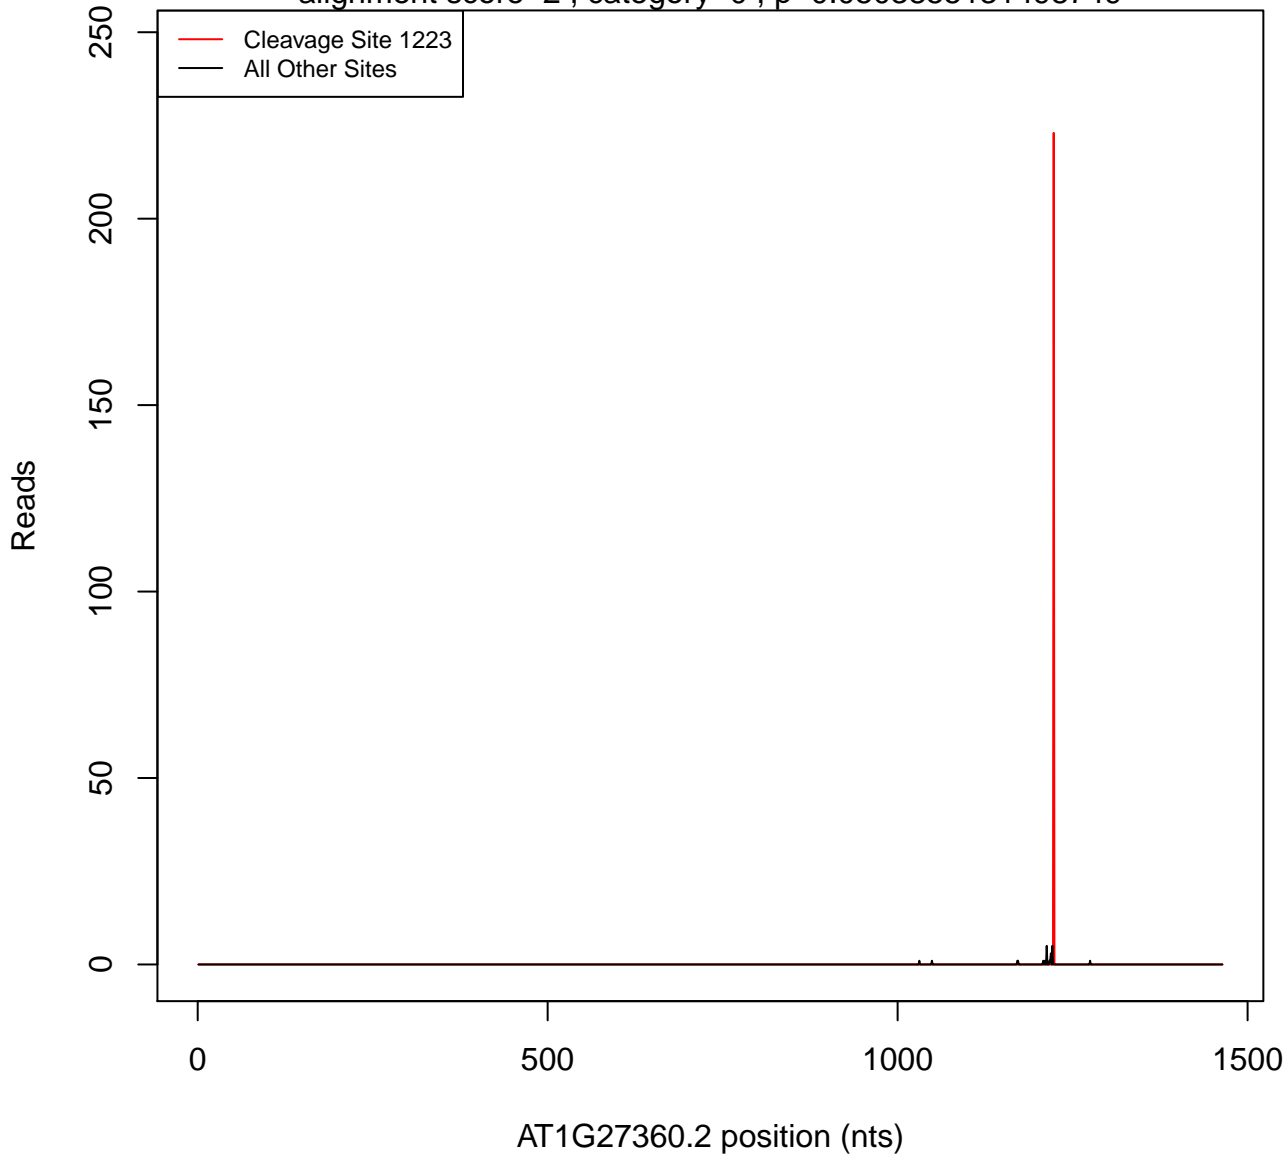

# ath-miR156h slicing AT1G27360.2 at nt 1223

alignment score=2 , category=0 , p=0.0561437826265823

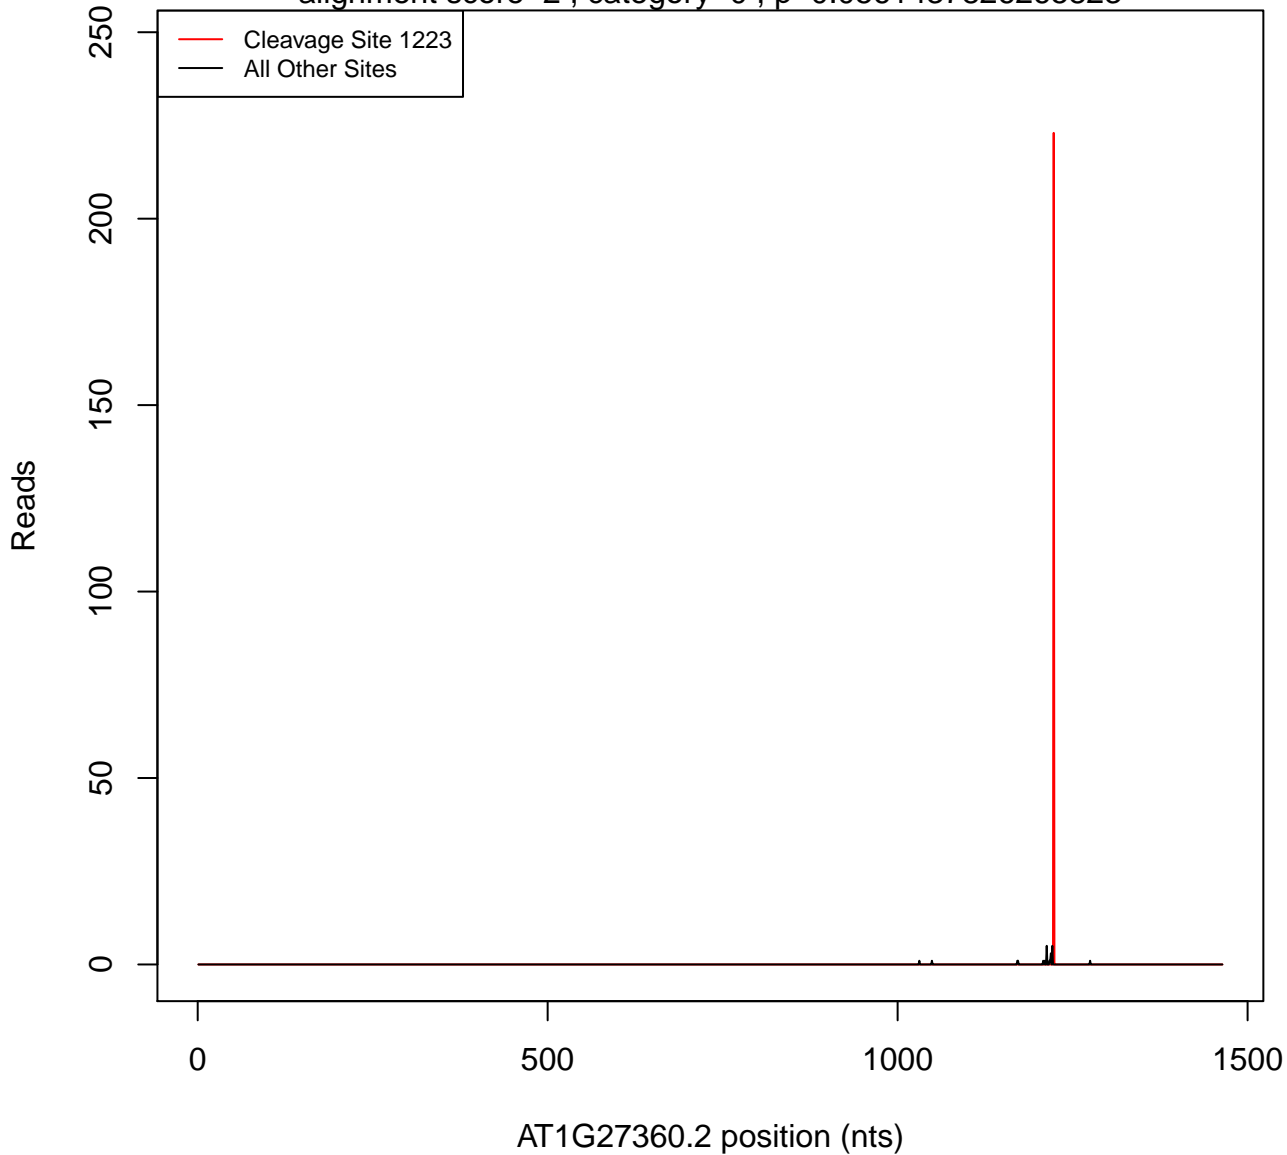

# ath-miR156i slicing AT1G27360.2 at nt 1223

alignment score=1 , category=0 , p=0.0626448986382654

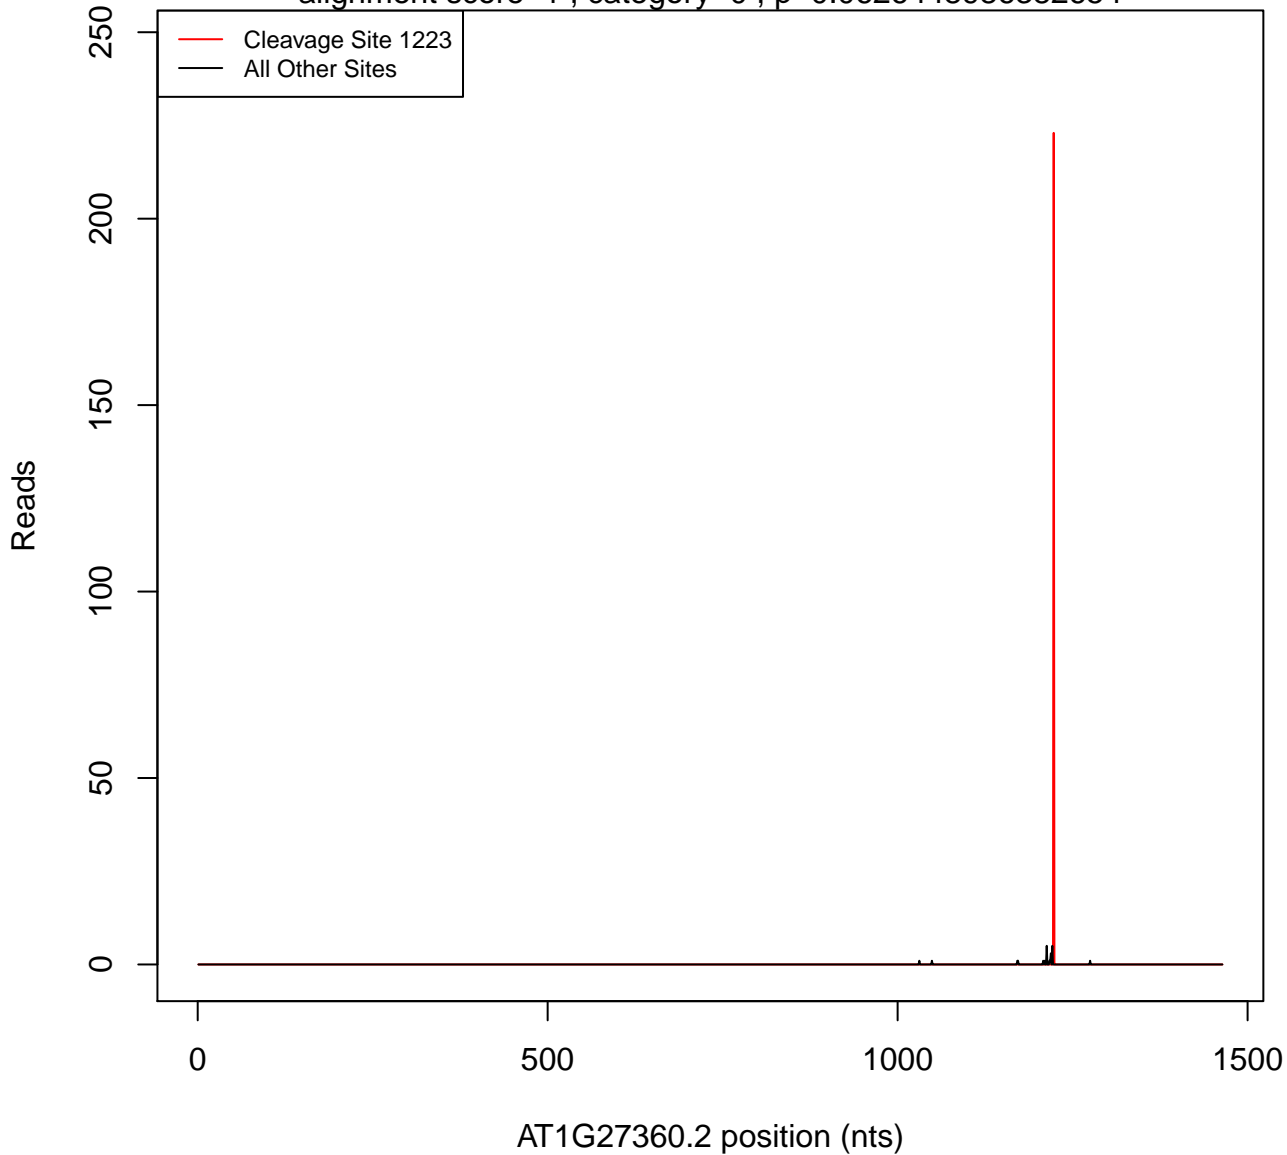

# ath-miR156j slicing AT1G27360.2 at nt 1223

alignment score=0 , category=0 , p=0.0680712184898578

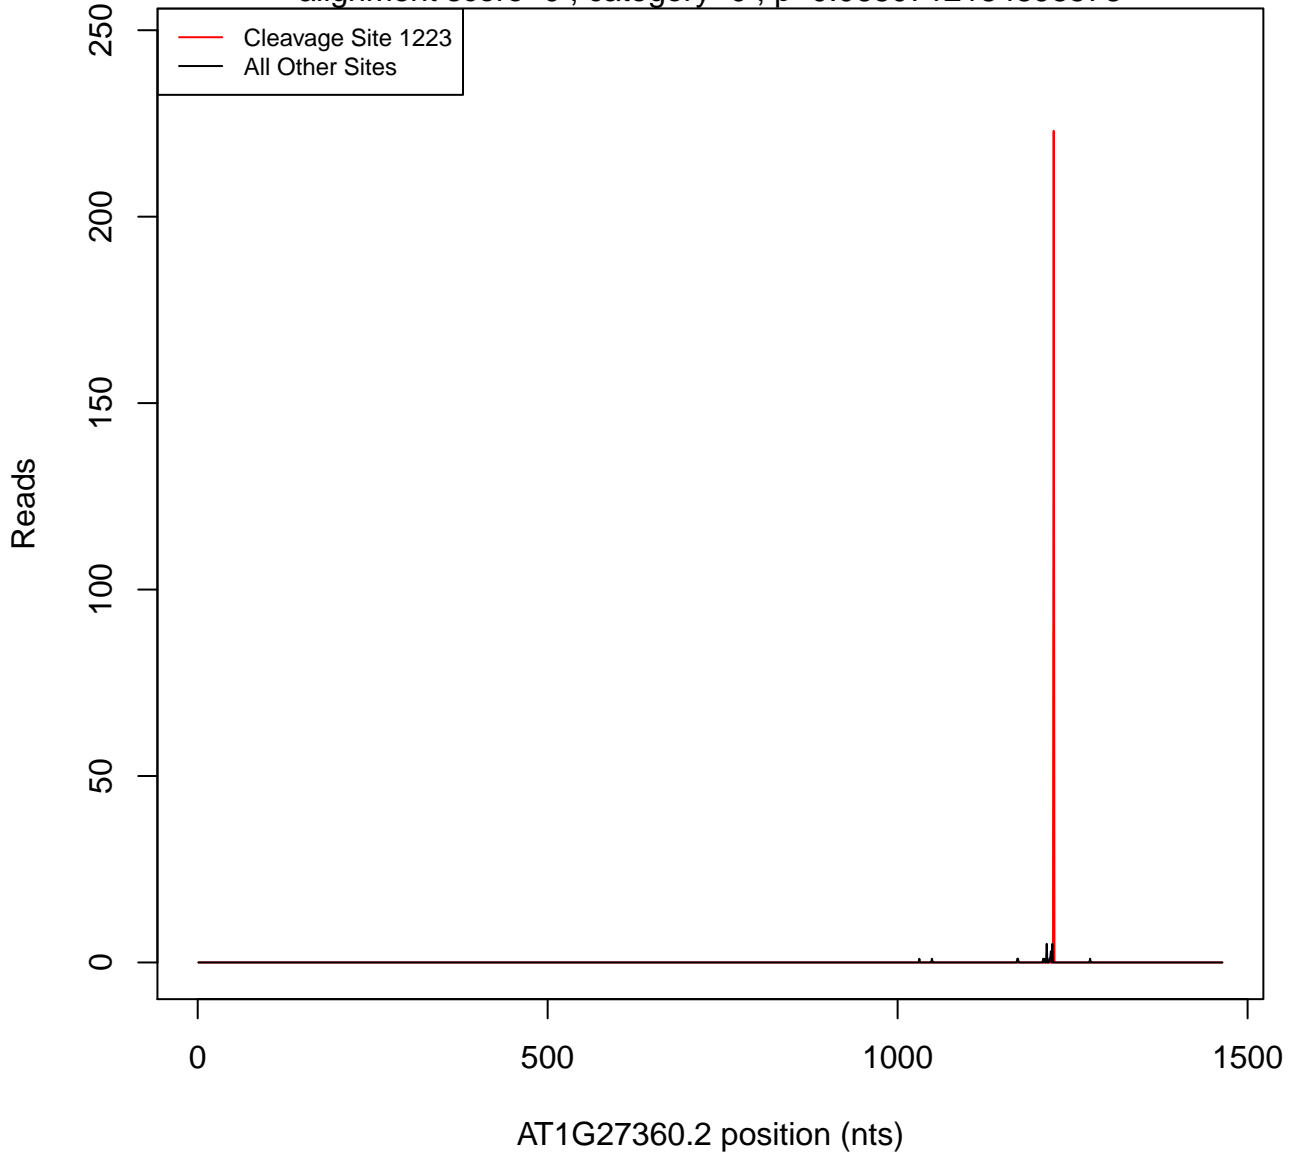

# ath-miR157d slicing AT1G27360.2 at nt 1223

alignment score=2 , category=0 , p=0.0561437826265823



# ath-miR156a slicing AT1G27360.3 at nt 1250

alignment score=1 , category=0 , p=0.0592699262622588

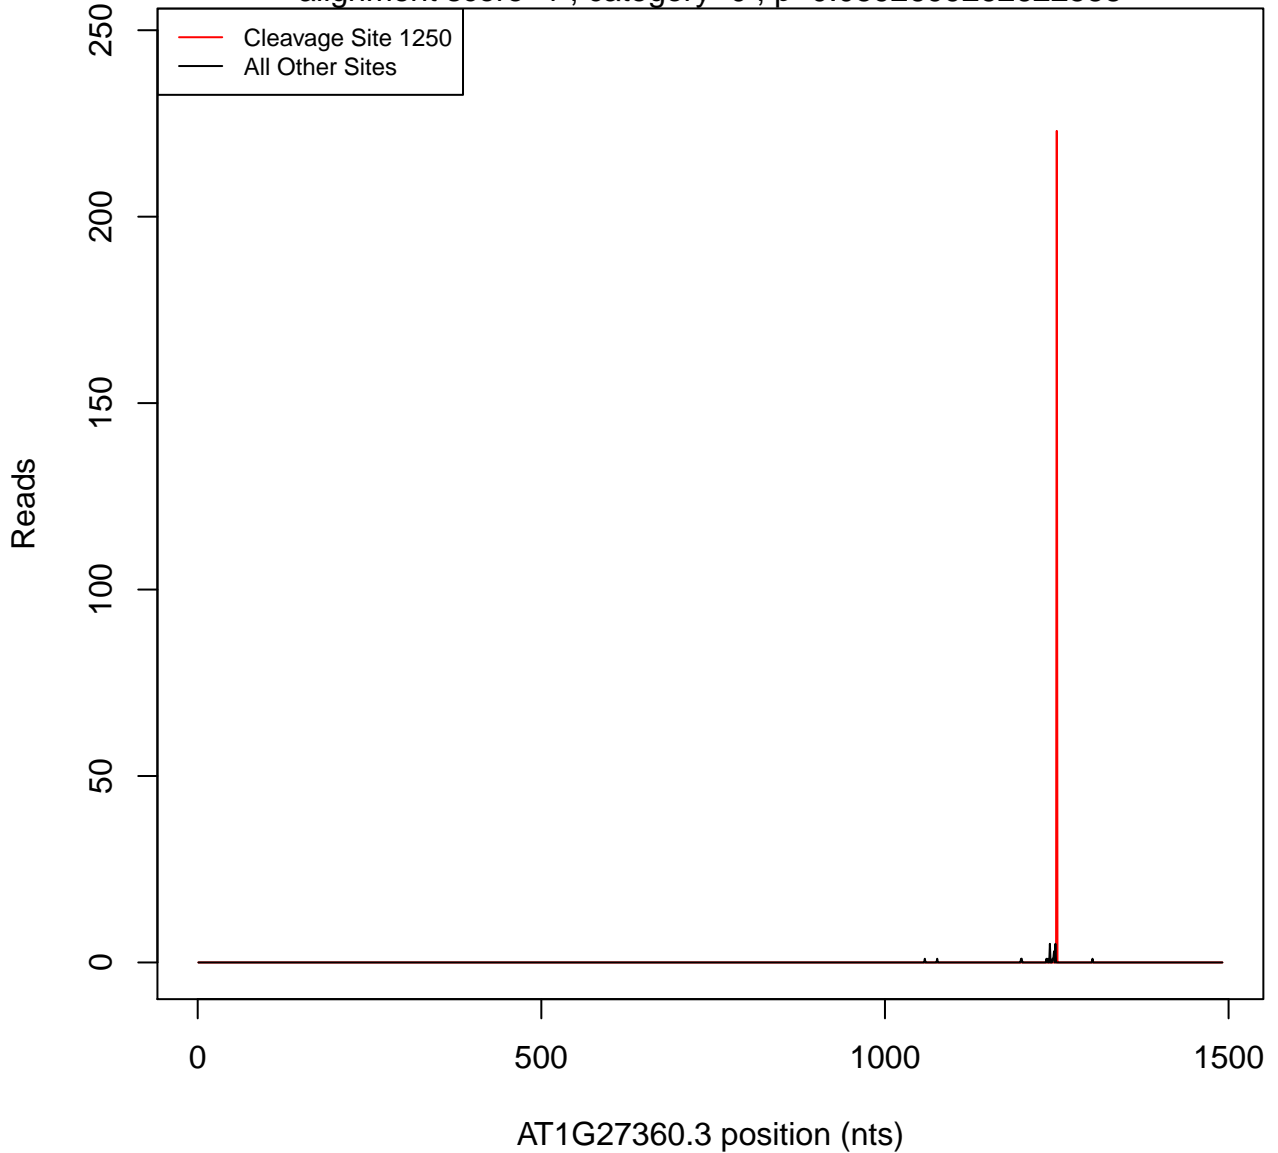



# ath-miR156b slicing AT1G27360.3 at nt 1250

alignment score=1 , category=0 , p=0.0592699262622588

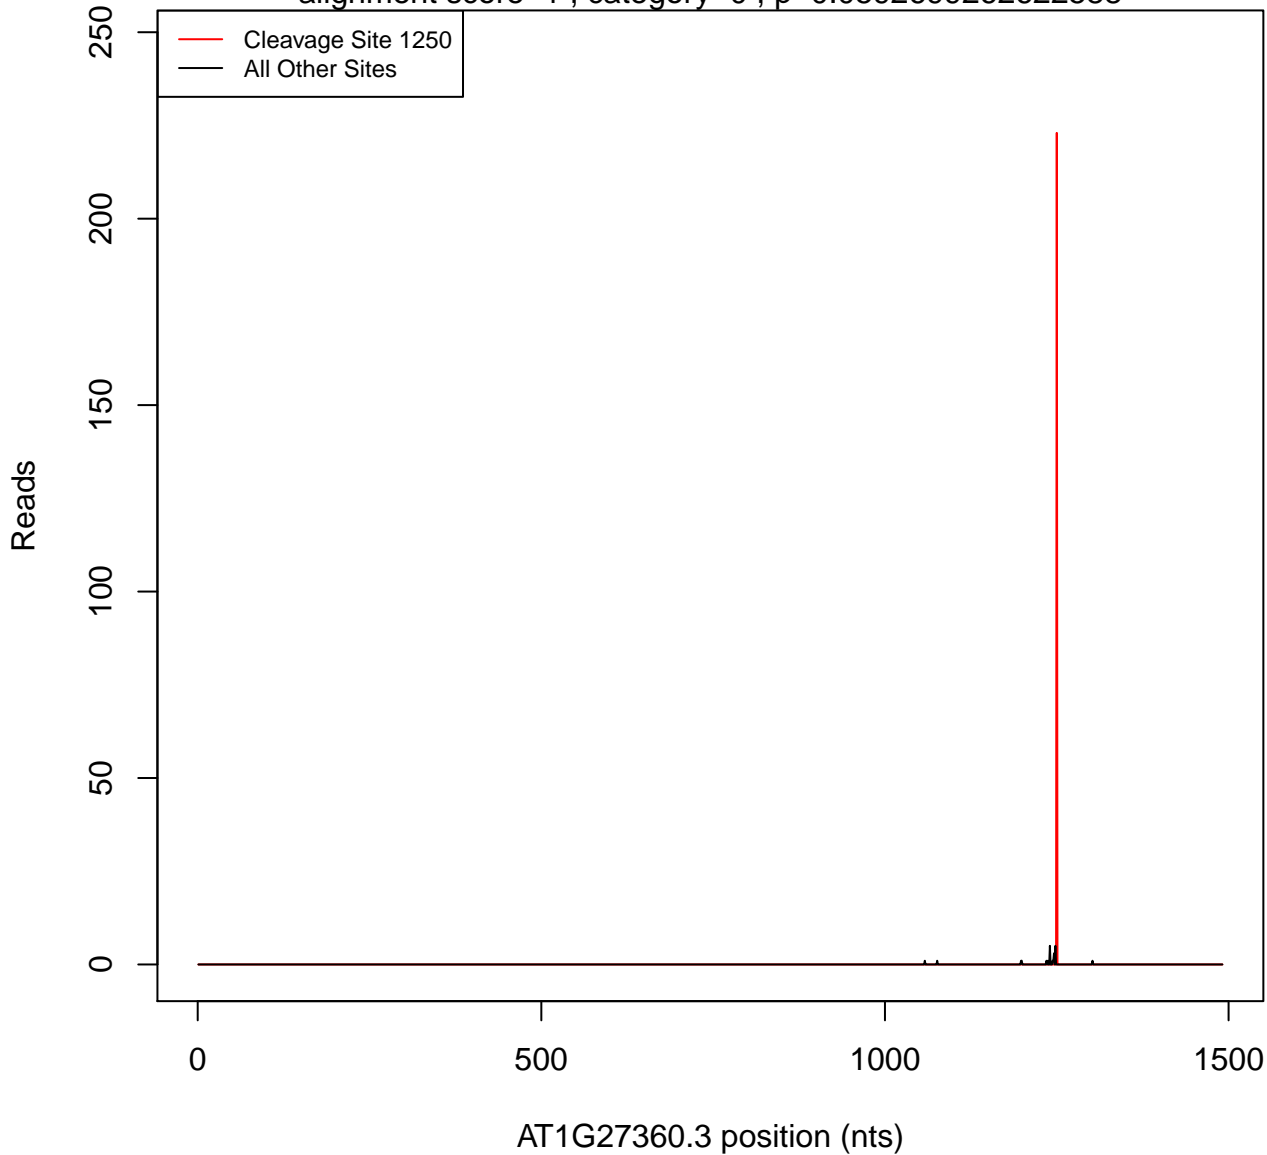

# ath-miR156c slicing AT1G27360.3 at nt 1250

alignment score=1 , category=0 , p=0.0592699262622588

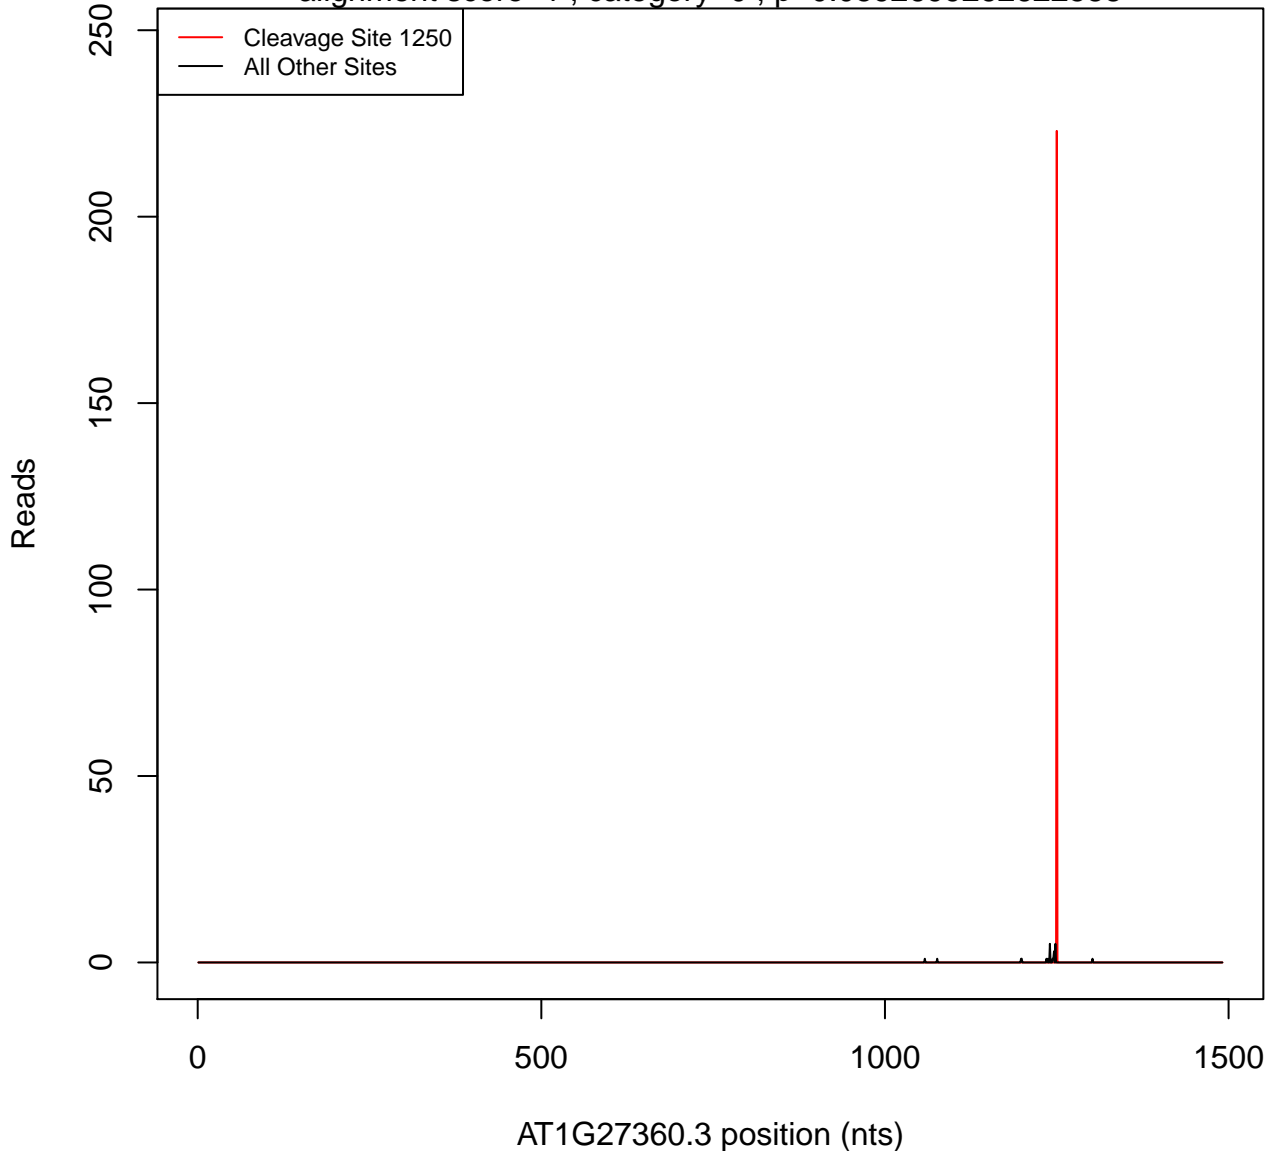

# ath-miR156d slicing AT1G27360.3 at nt 1250

alignment score=1 , category=0 , p=0.0592699262622588



# ath-miR156e slicing AT1G27360.3 at nt 1250

alignment score=1 , category=0 , p=0.0592699262622588



# ath-miR156f slicing AT1G27360.3 at nt 1250

alignment score=1 , category=0 , p=0.0592699262622588



# ath-miR156g slicing AT1G27360.3 at nt 1250

alignment score=2 , category=0 , p=0.0503855131498749

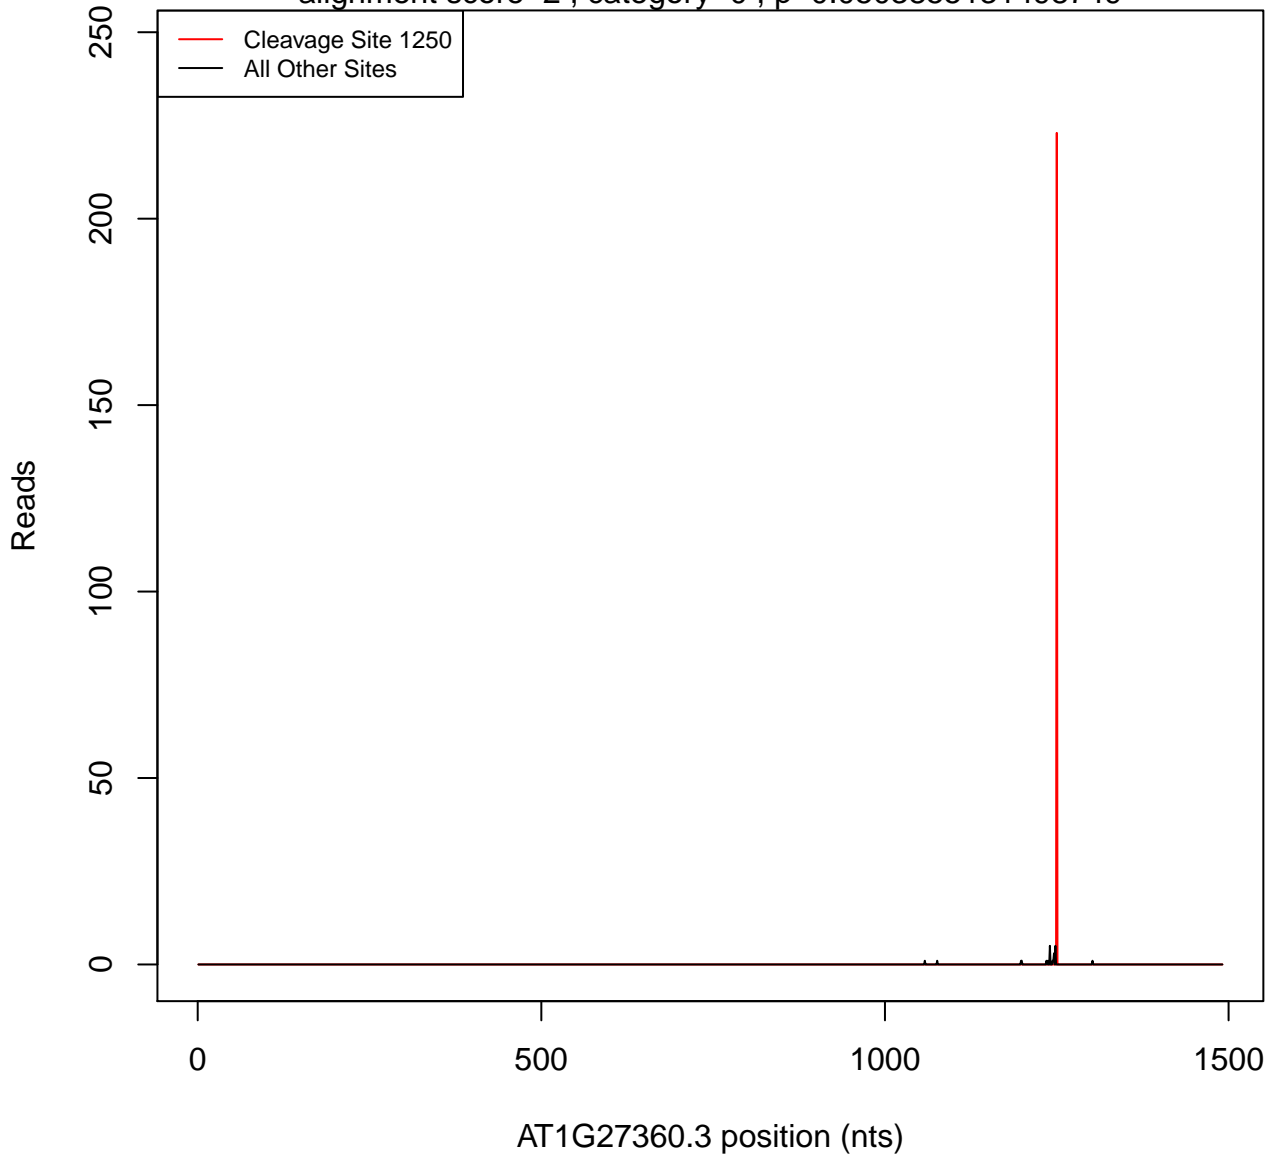

# ath-miR156h slicing AT1G27360.3 at nt 1250

alignment score=2 , category=0 , p=0.0561437826265823

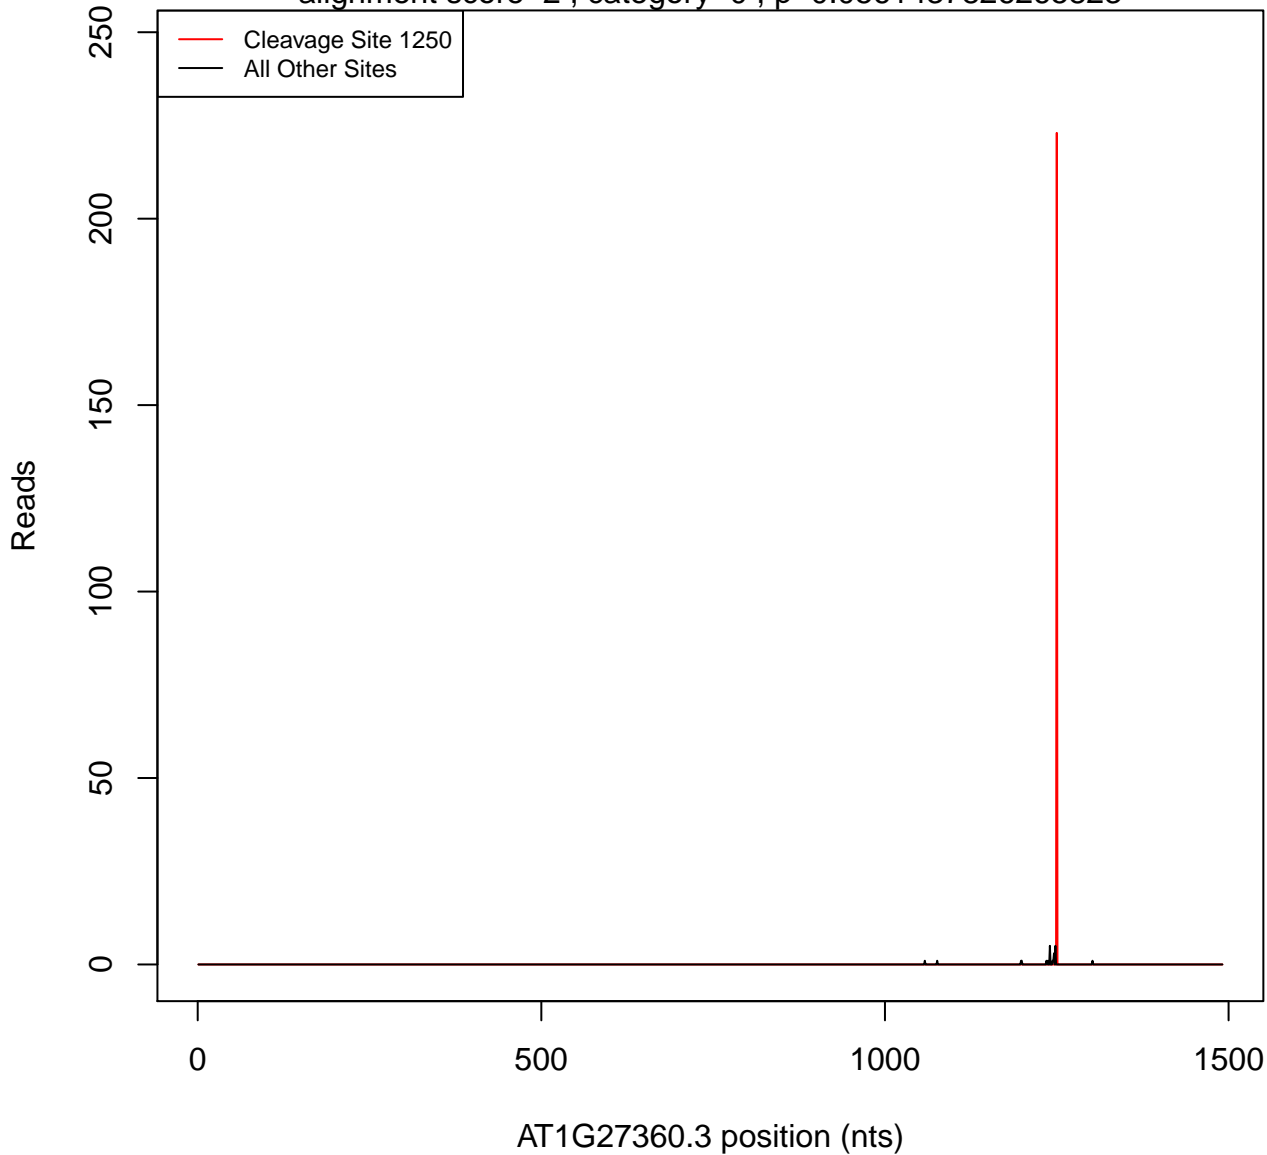

# ath-miR156i slicing AT1G27360.3 at nt 1250

alignment score=1 , category=0 , p=0.0626448986382654

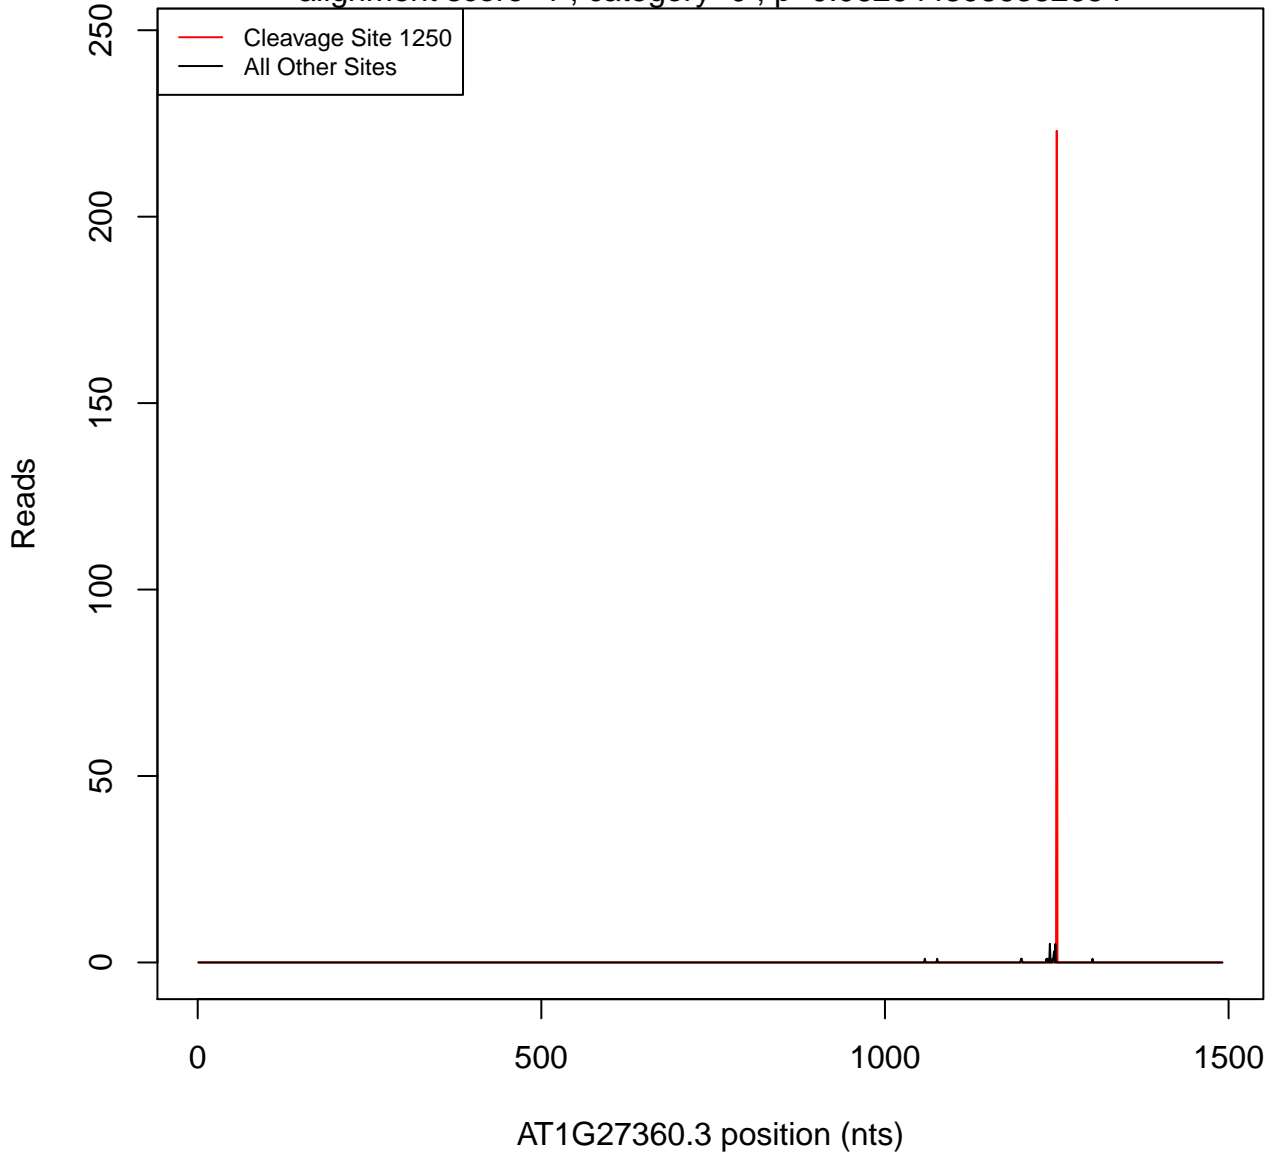



# ath-miR156j slicing AT1G27360.3 at nt 1250

alignment score=0 , category=0 , p=0.0680712184898578

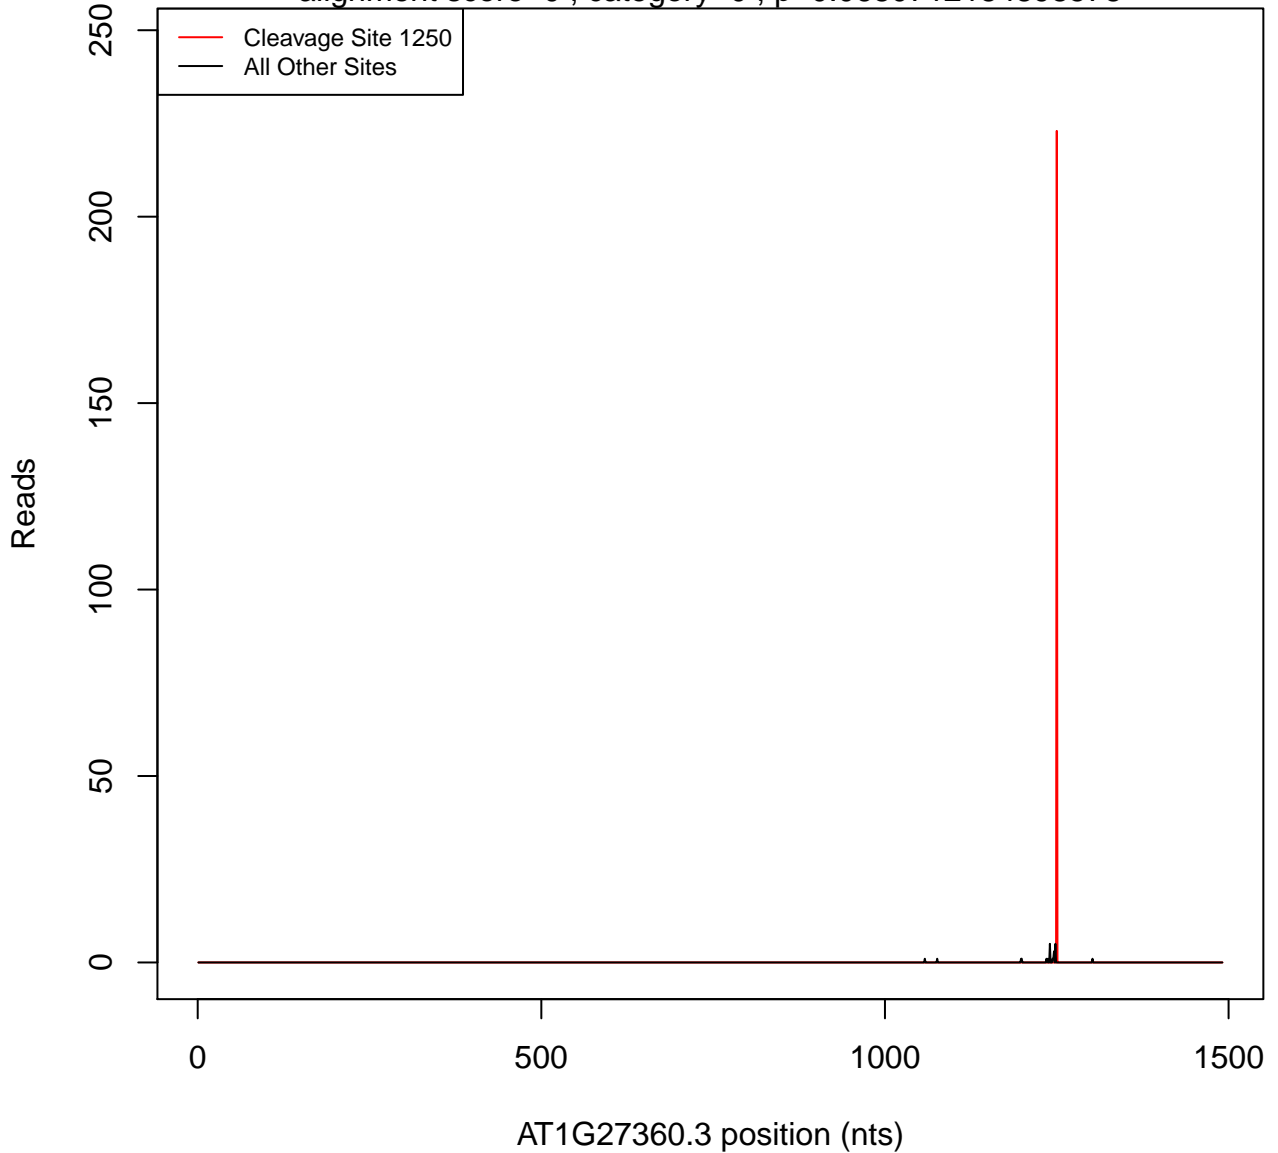

# ath-miR157d slicing AT1G27360.3 at nt 1250

alignment score=2 , category=0 , p=0.0561437826265823

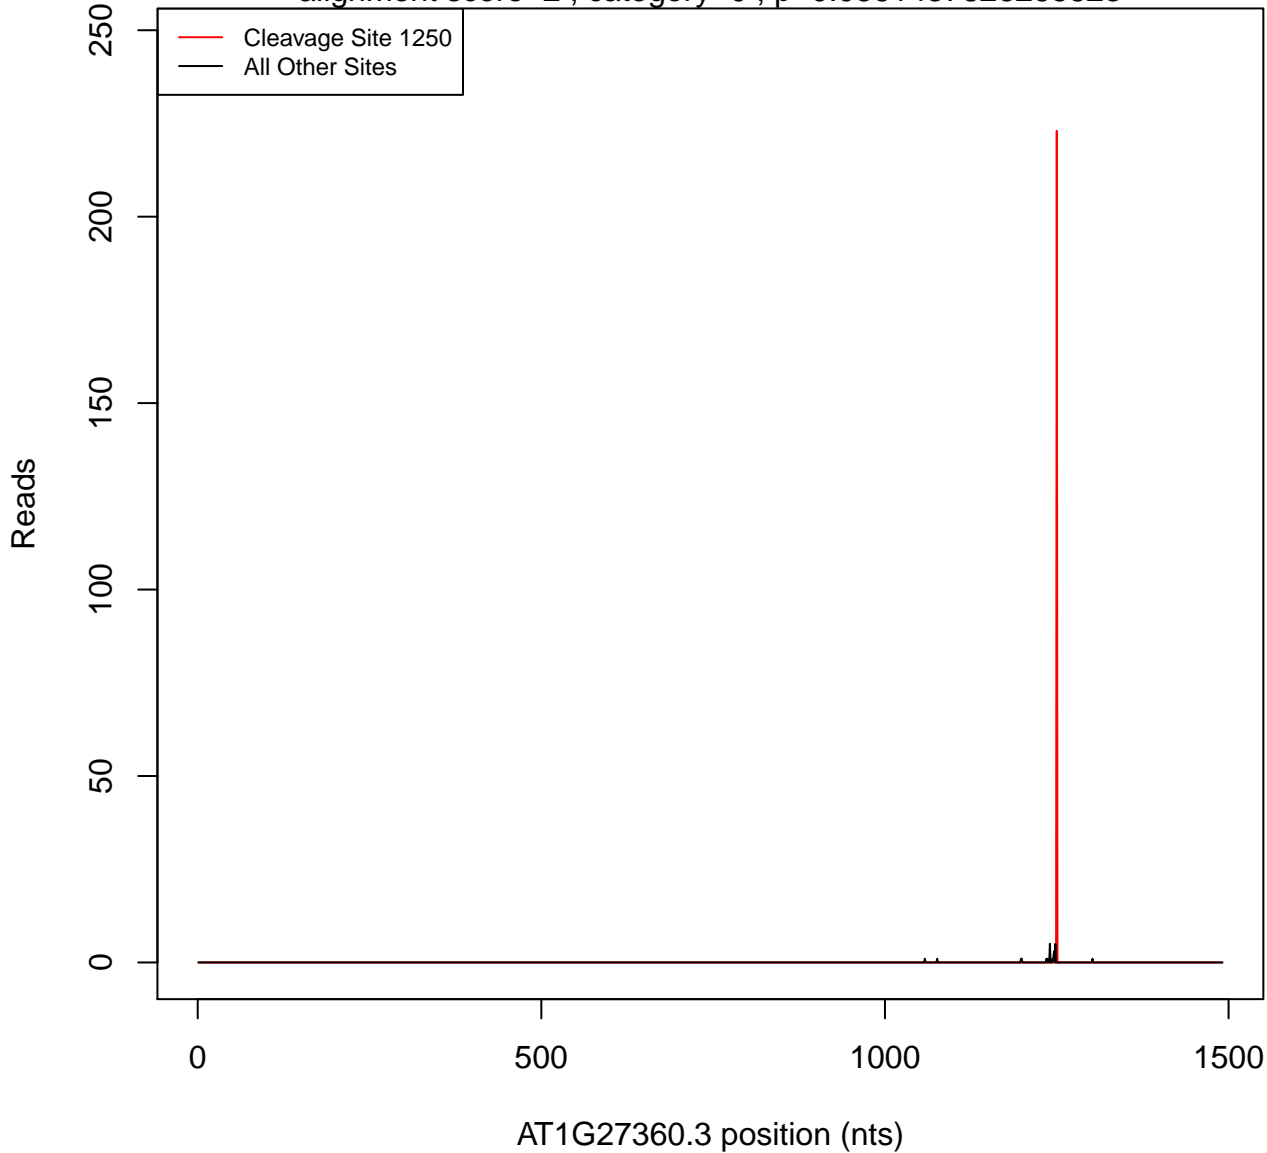

# ath-miR156a slicing AT1G27360.4 at nt 1310

alignment score=1 , category=0 , p=0.0592699262622588

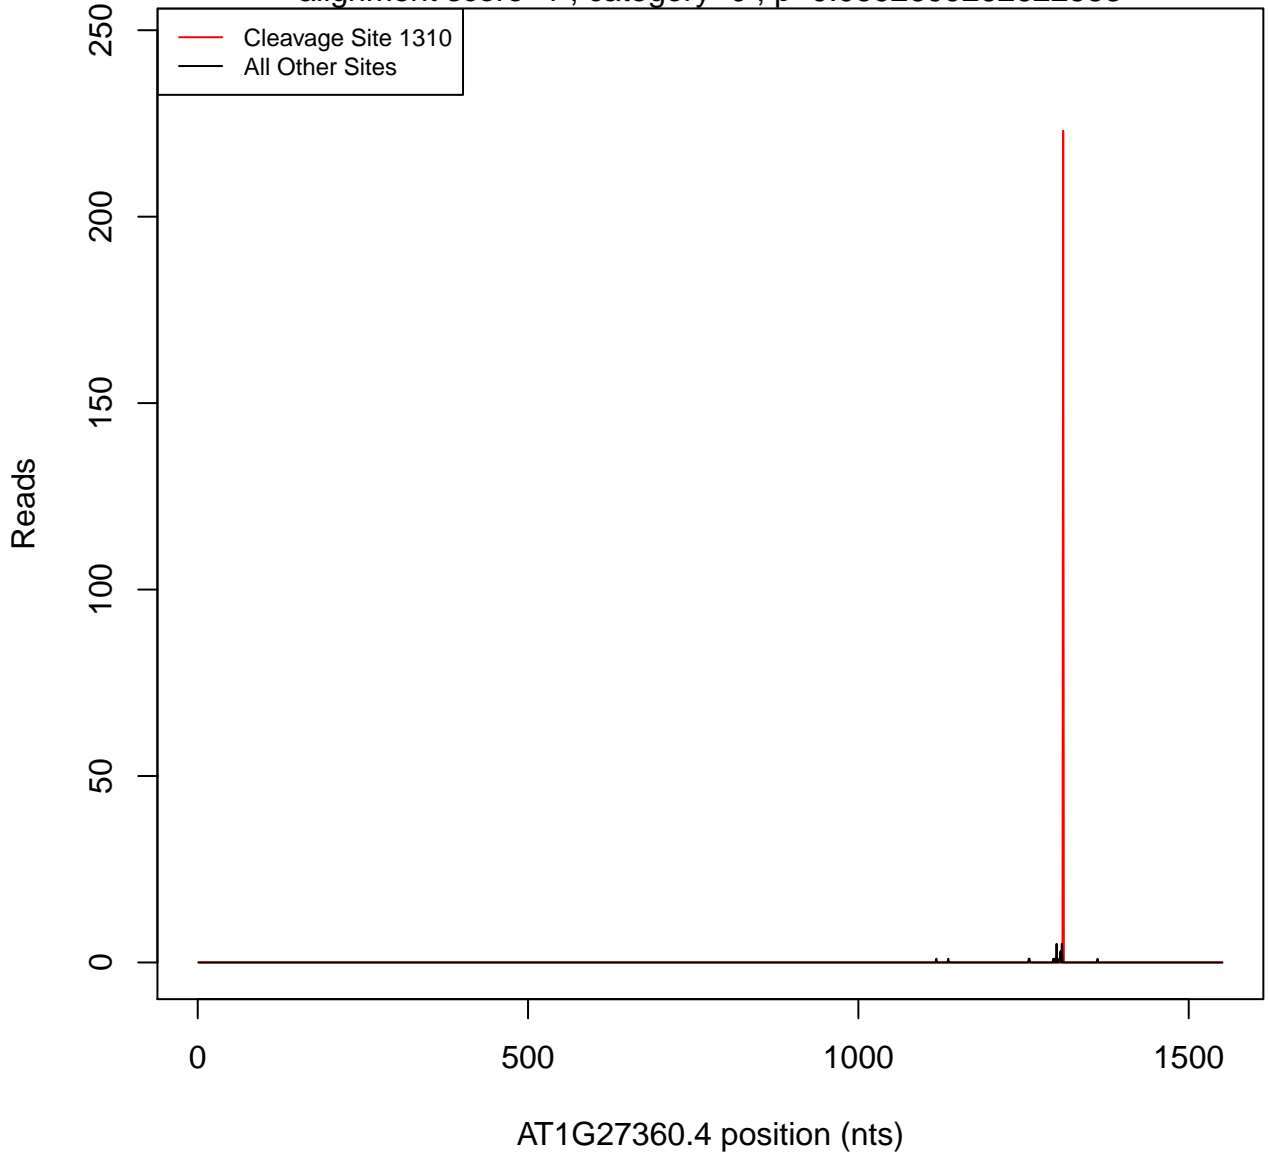

# ath-miR156b slicing AT1G27360.4 at nt 1310

alignment score=1 , category=0 , p=0.0592699262622588

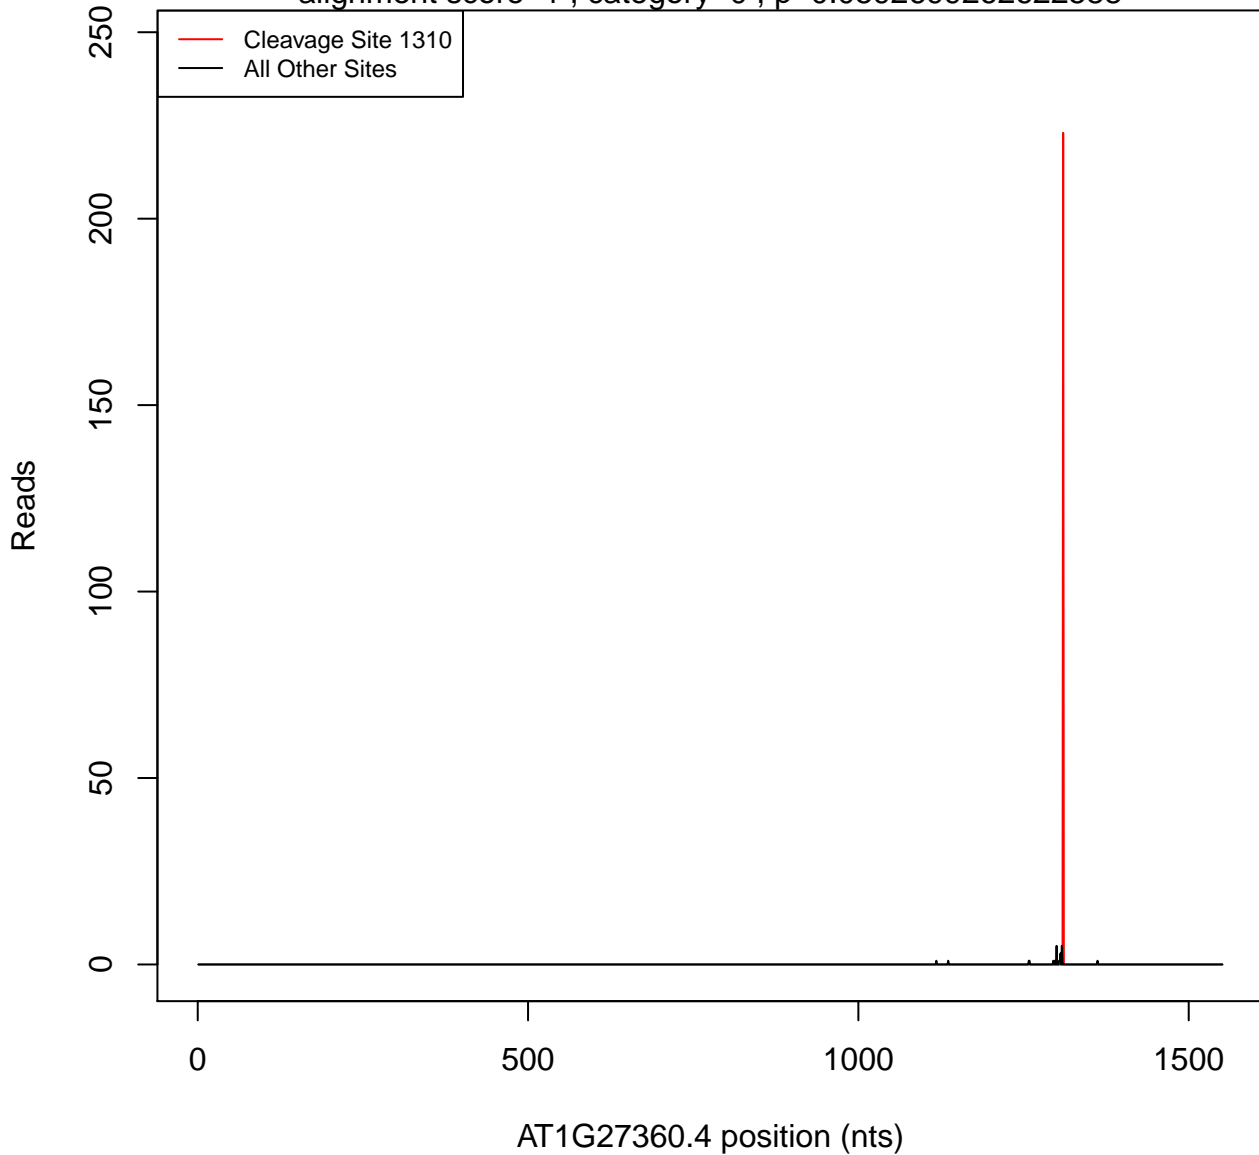

# ath-miR156c slicing AT1G27360.4 at nt 1310

alignment score=1 , category=0 , p=0.0592699262622588

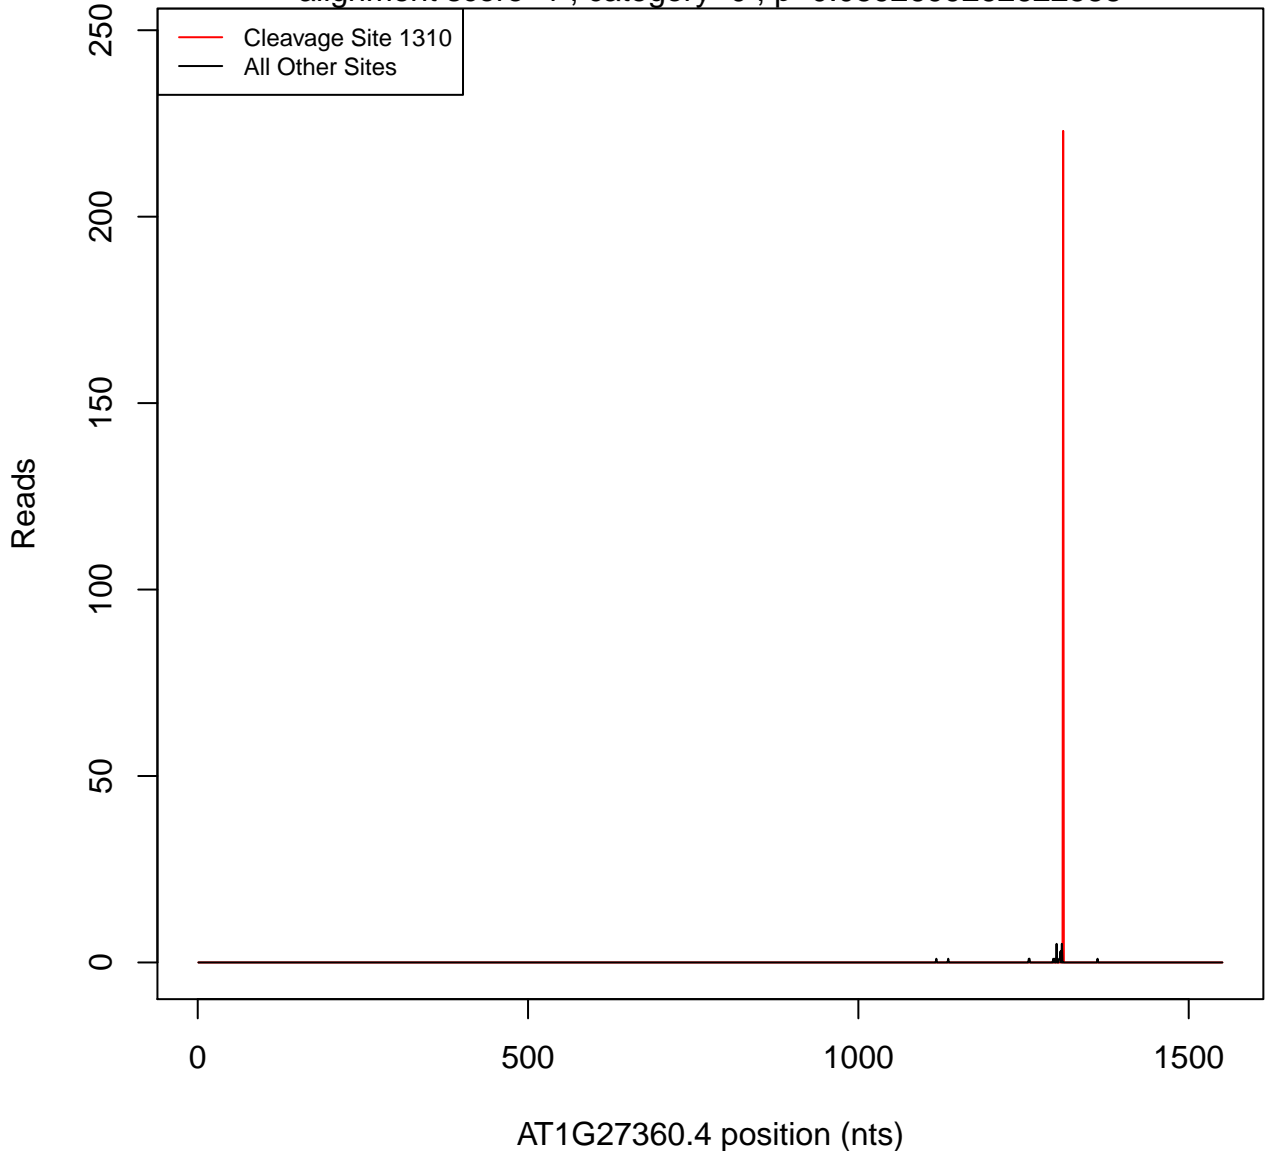

# ath-miR156d slicing AT1G27360.4 at nt 1310

alignment score=1 , category=0 , p=0.0592699262622588

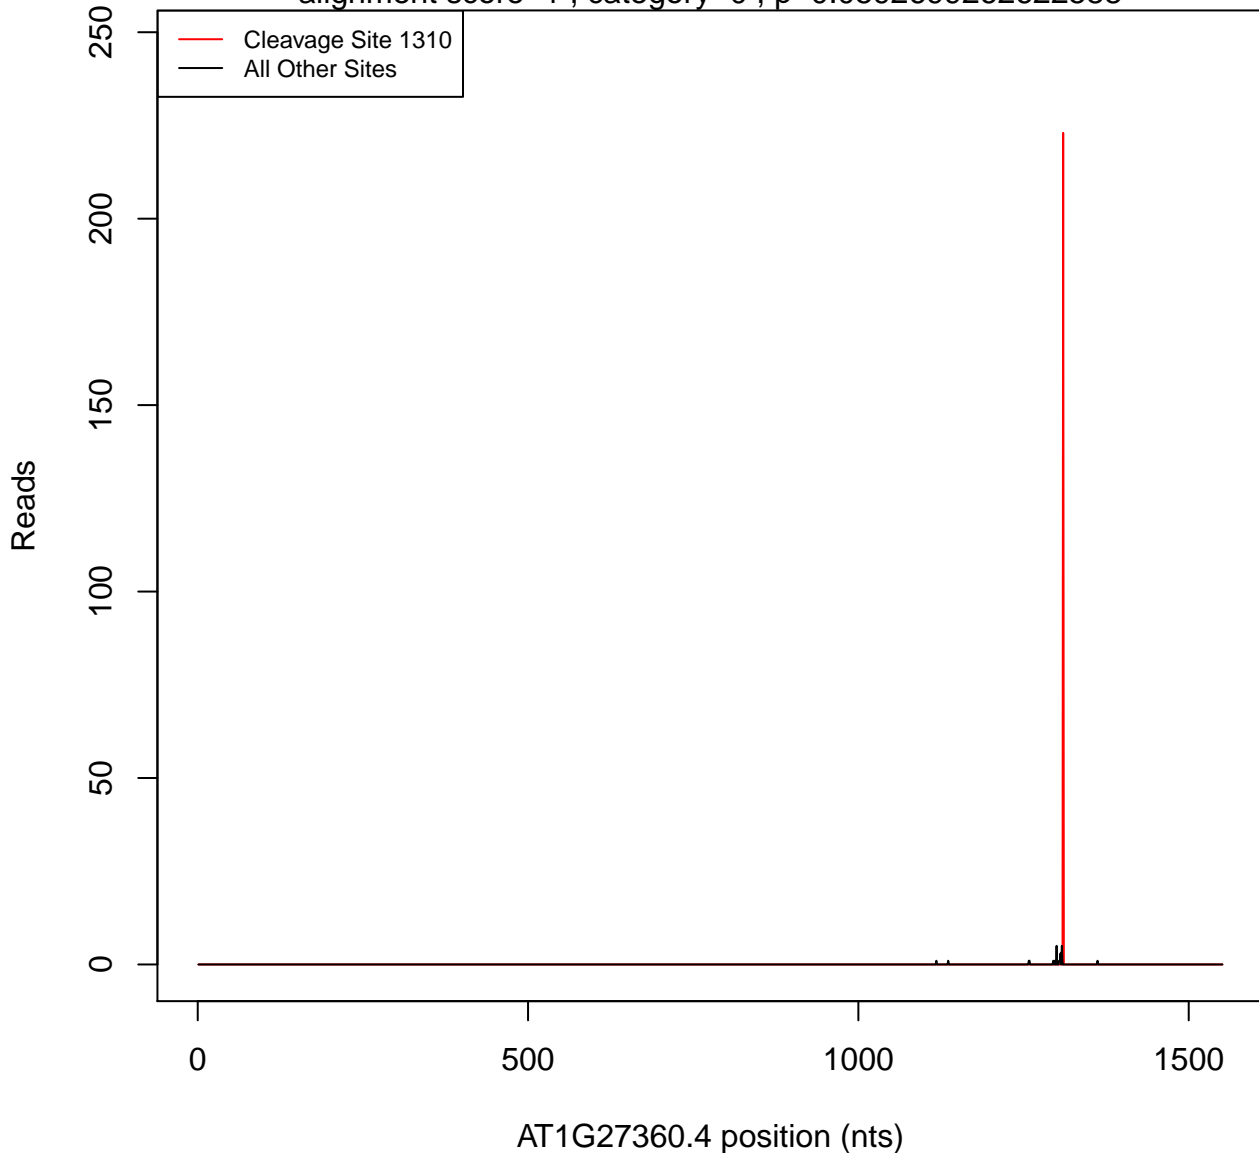

# ath-miR156e slicing AT1G27360.4 at nt 1310

alignment score=1 , category=0 , p=0.0592699262622588

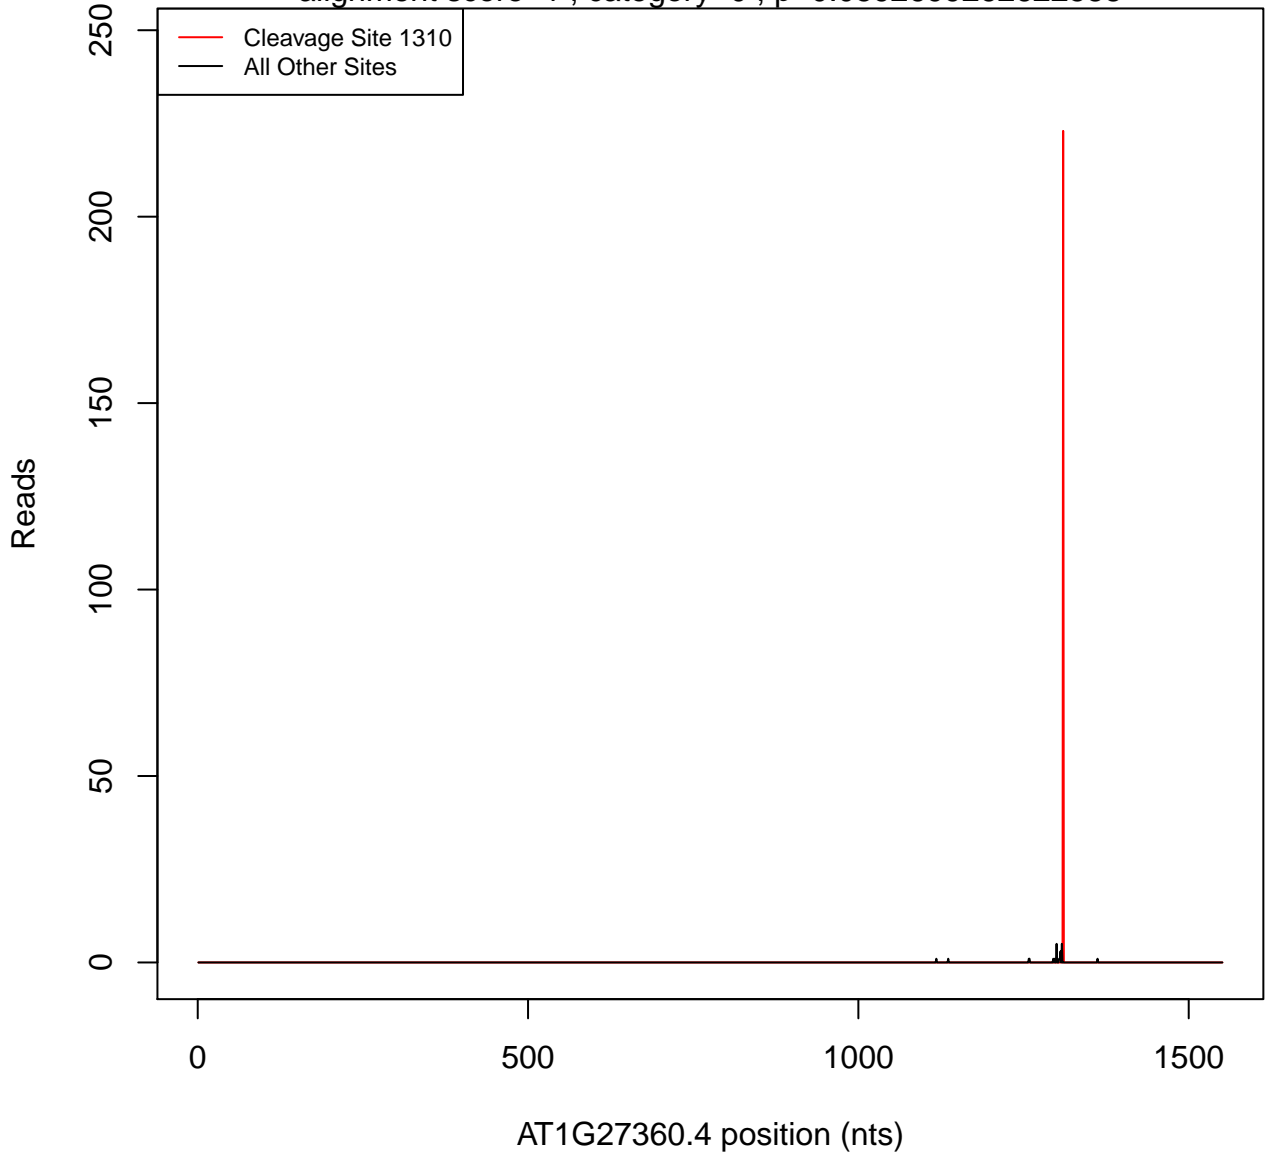

# ath-miR156f slicing AT1G27360.4 at nt 1310

alignment score=1 , category=0 , p=0.0592699262622588





# ath-miR156g slicing AT1G27360.4 at nt 1310

alignment score=2 , category=0 , p=0.0503855131498749

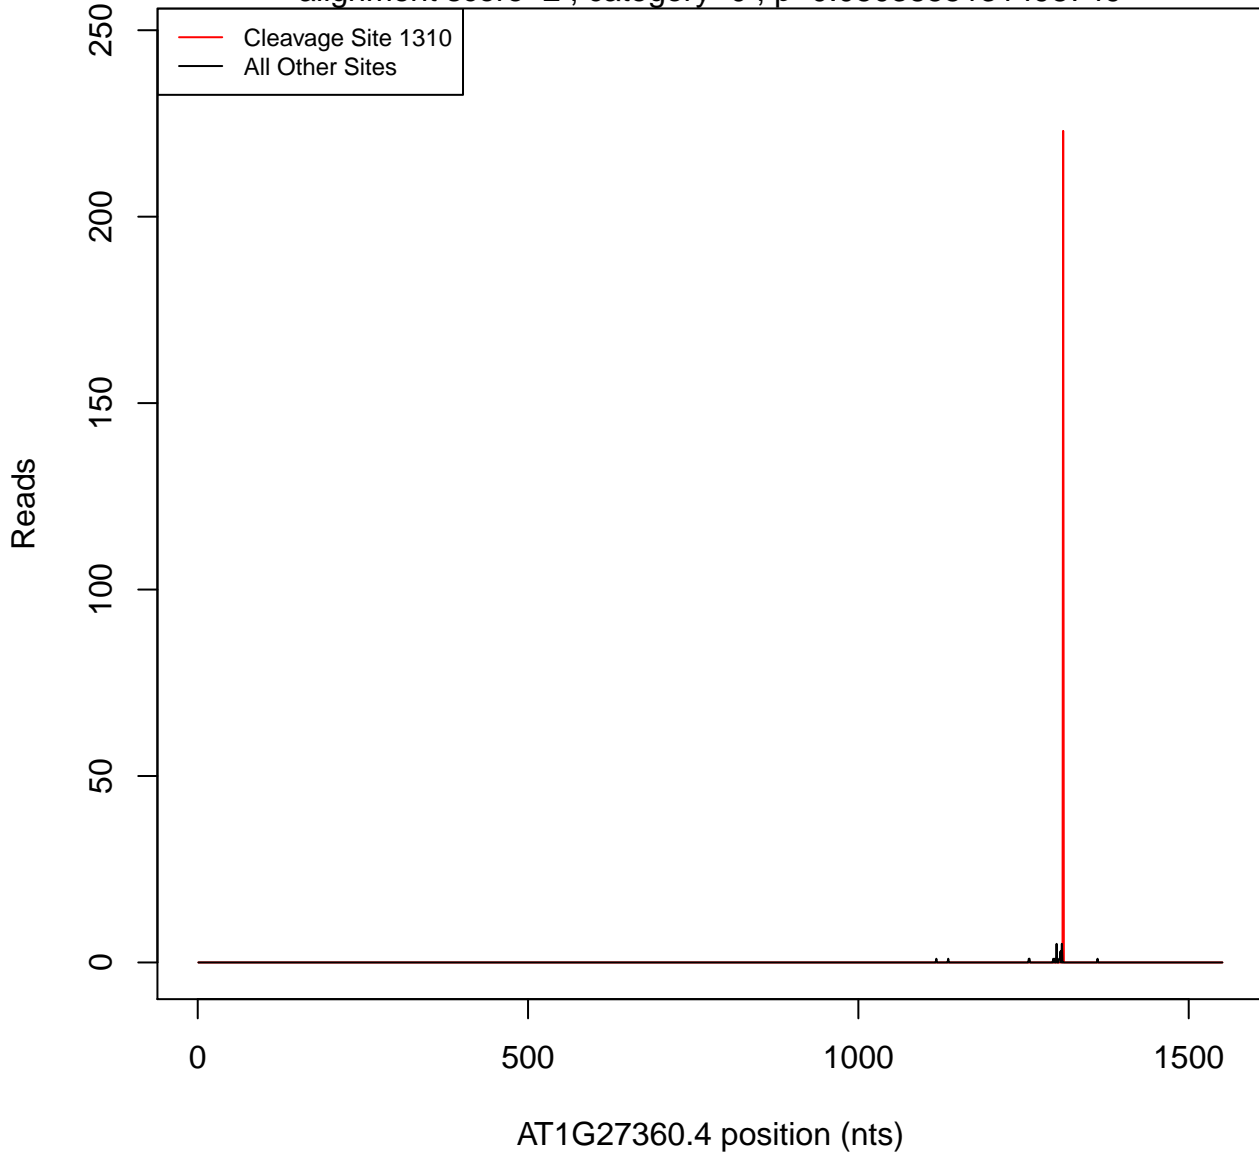

# ath-miR156h slicing AT1G27360.4 at nt 1310

alignment score=2 , category=0 , p=0.0561437826265823

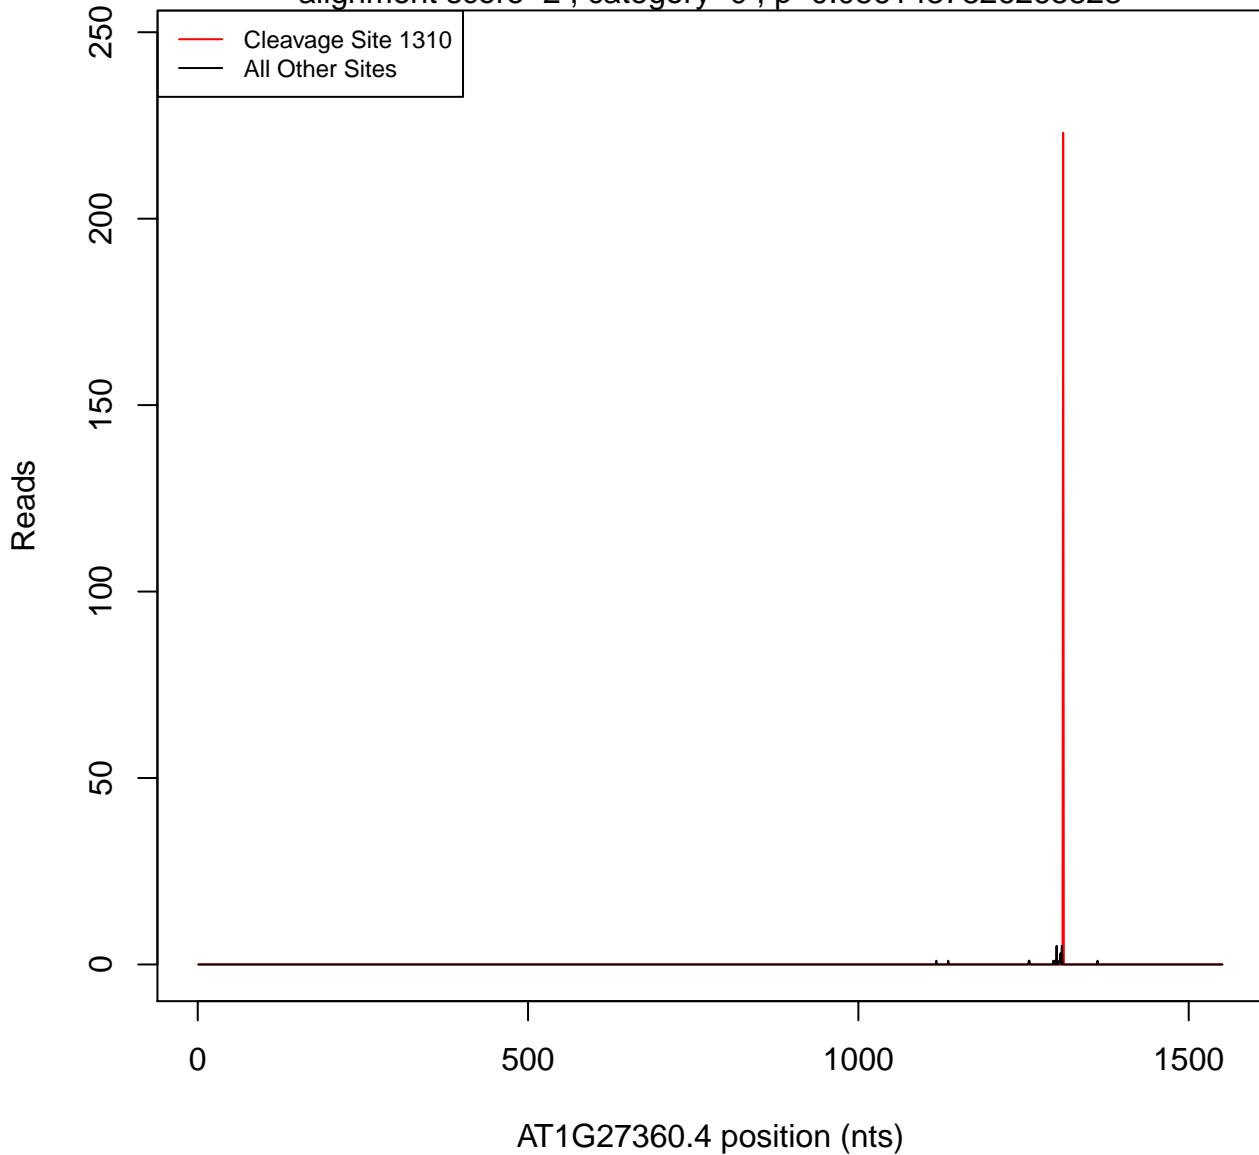

# ath-miR156i slicing AT1G27360.4 at nt 1310

alignment score=1 , category=0 , p=0.0626448986382654

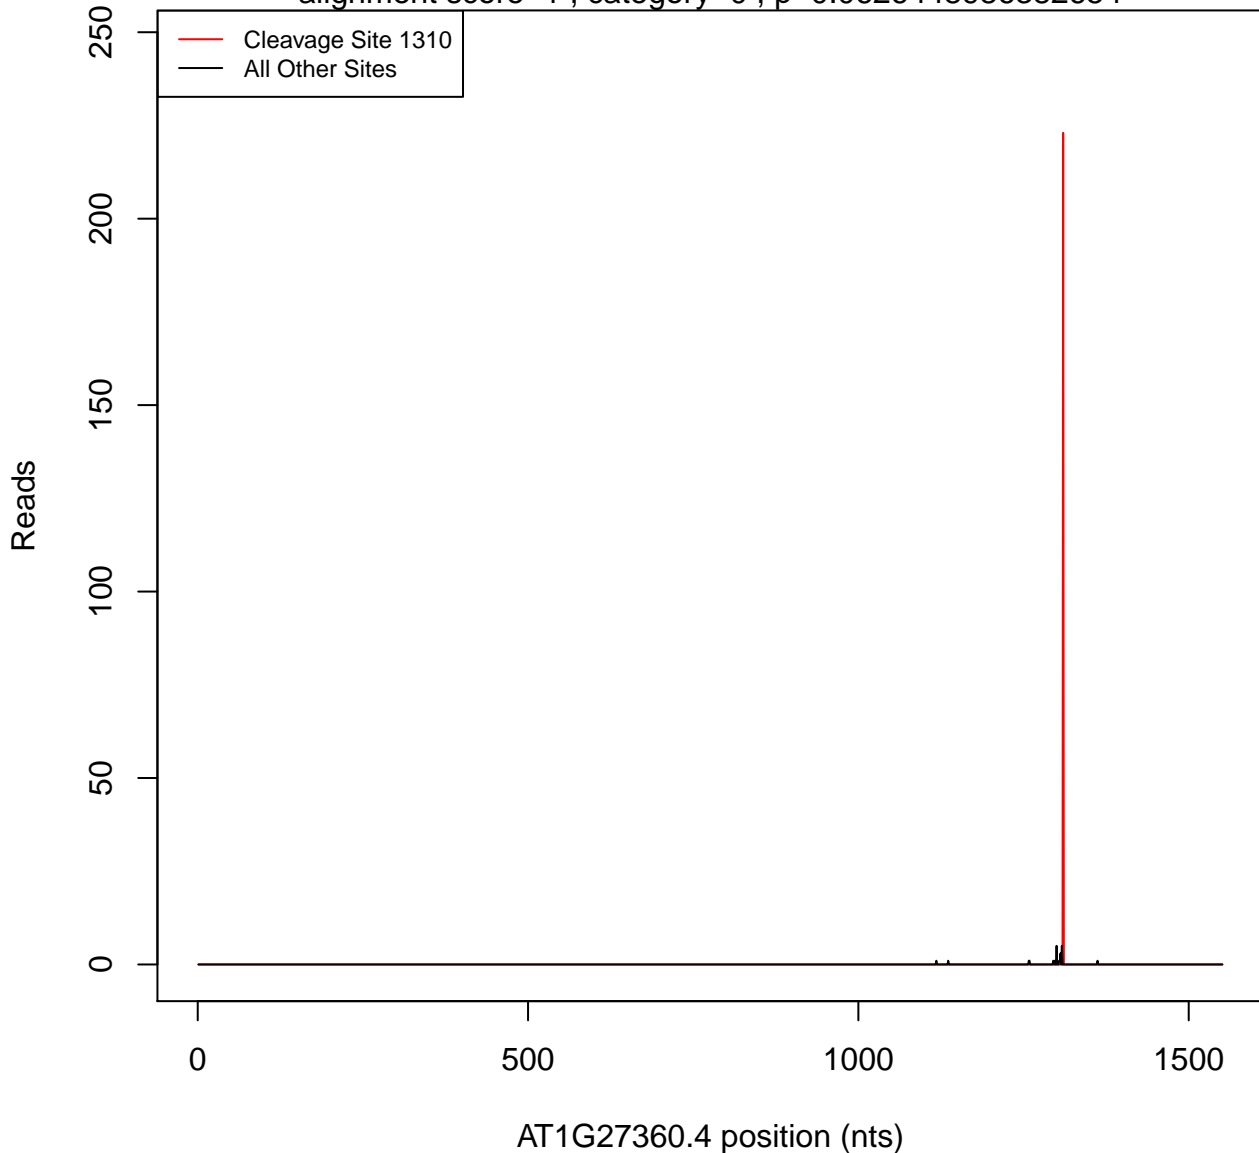

# ath-miR156j slicing AT1G27360.4 at nt 1310

alignment score=0 , category=0 , p=0.0680712184898578

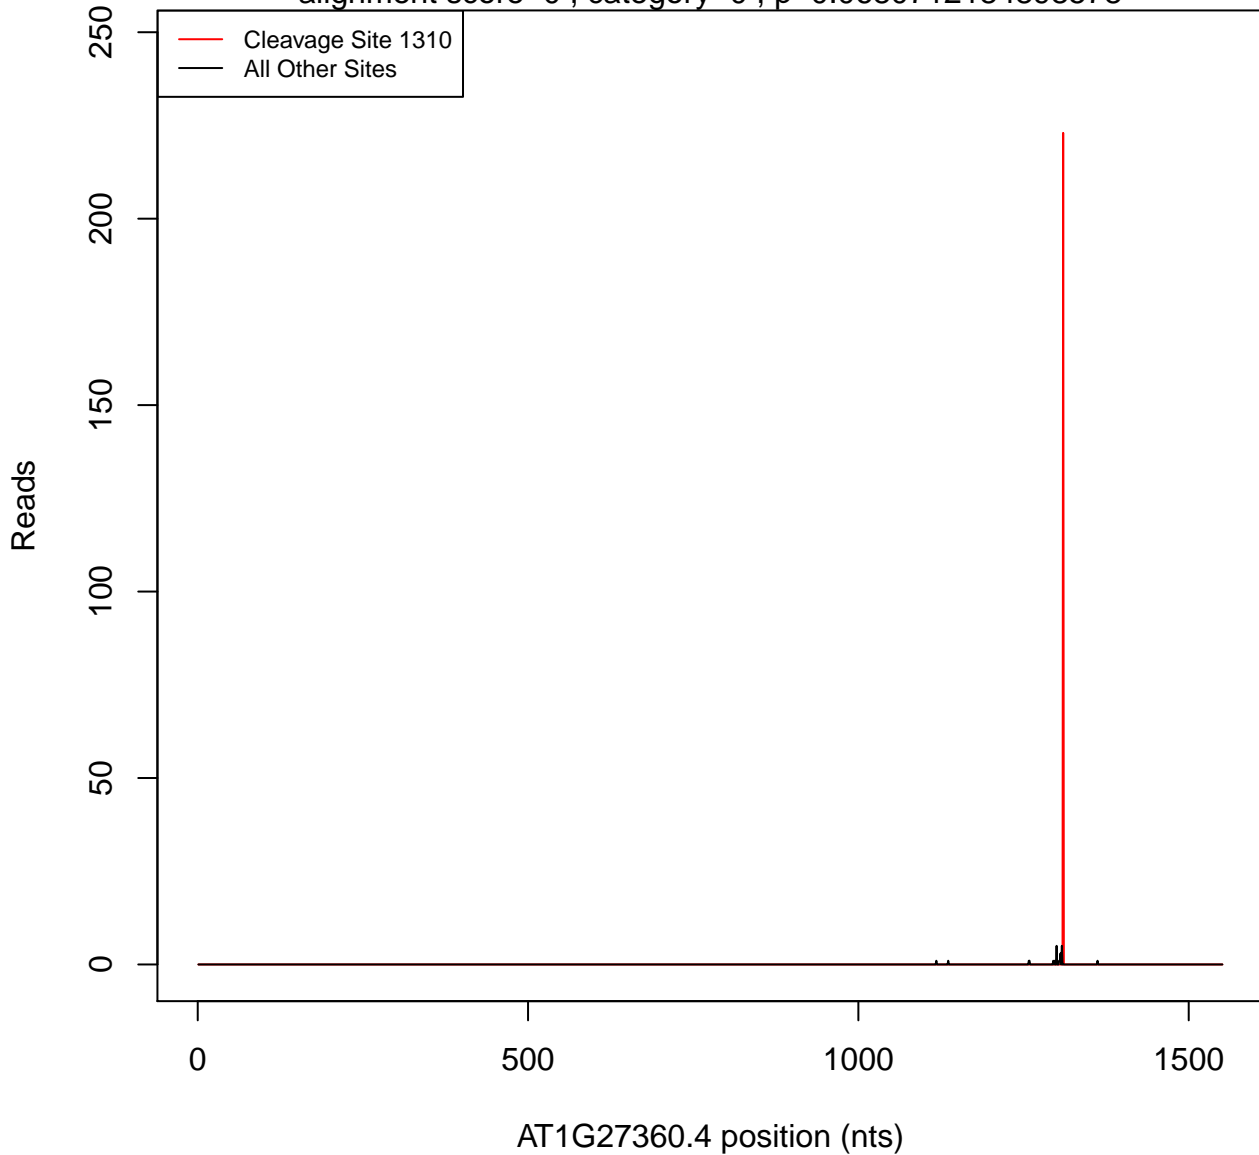

# ath-miR157d slicing AT1G27360.4 at nt 1310

alignment score=2 , category=0 , p=0.0561437826265823

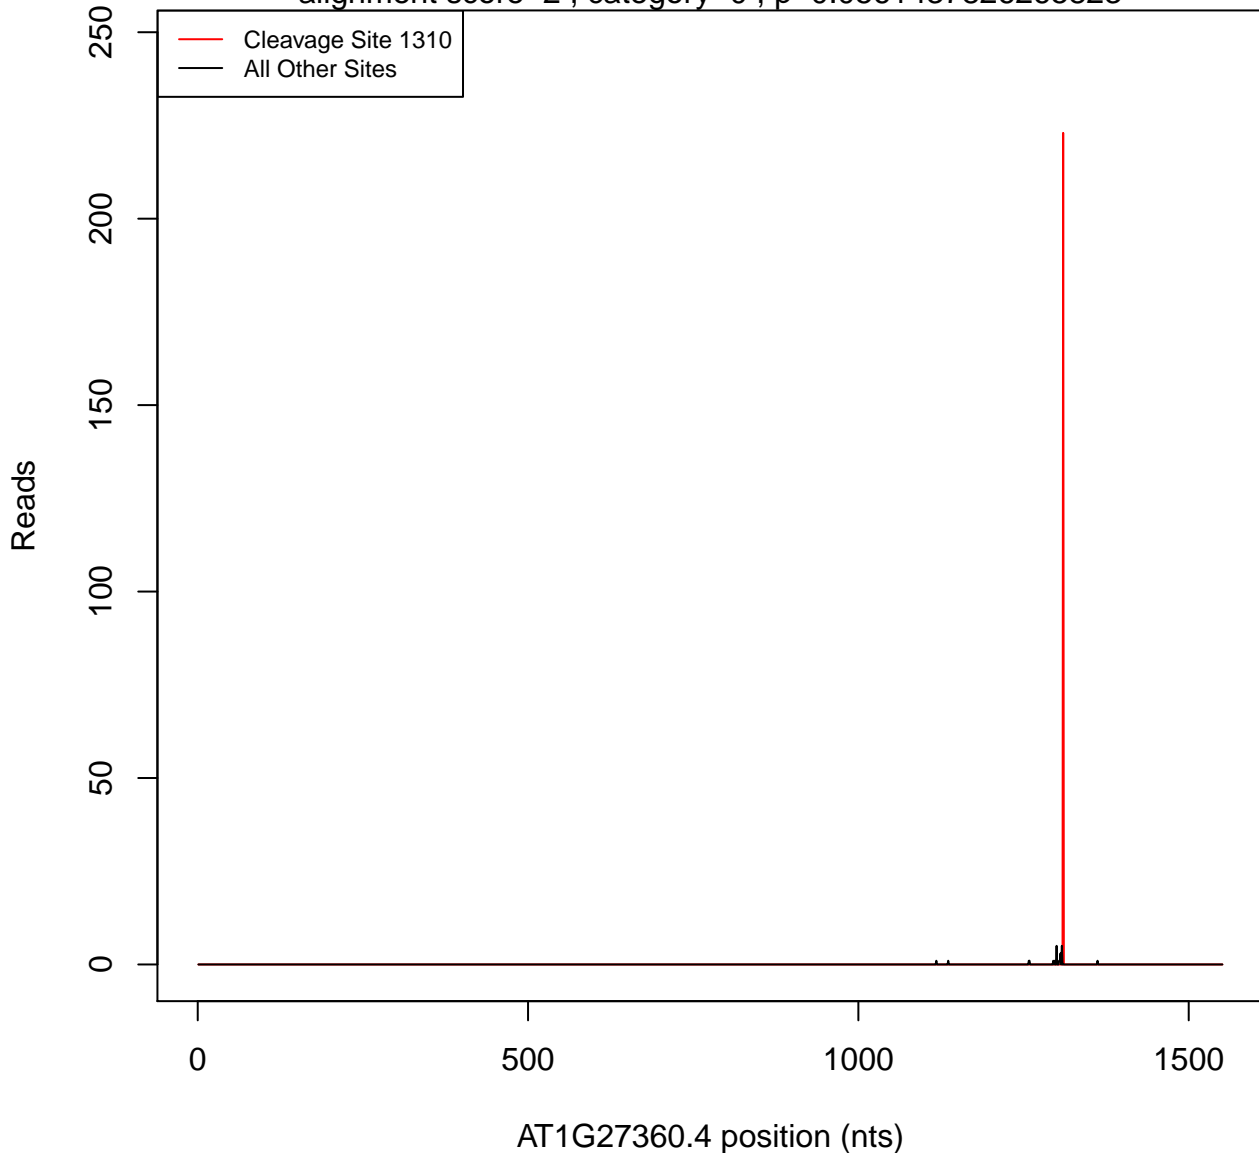

# ath-miR156a slicing AT1G27370.1 at nt 2378

alignment score=1 , category=0 , p=0.0592699262622588

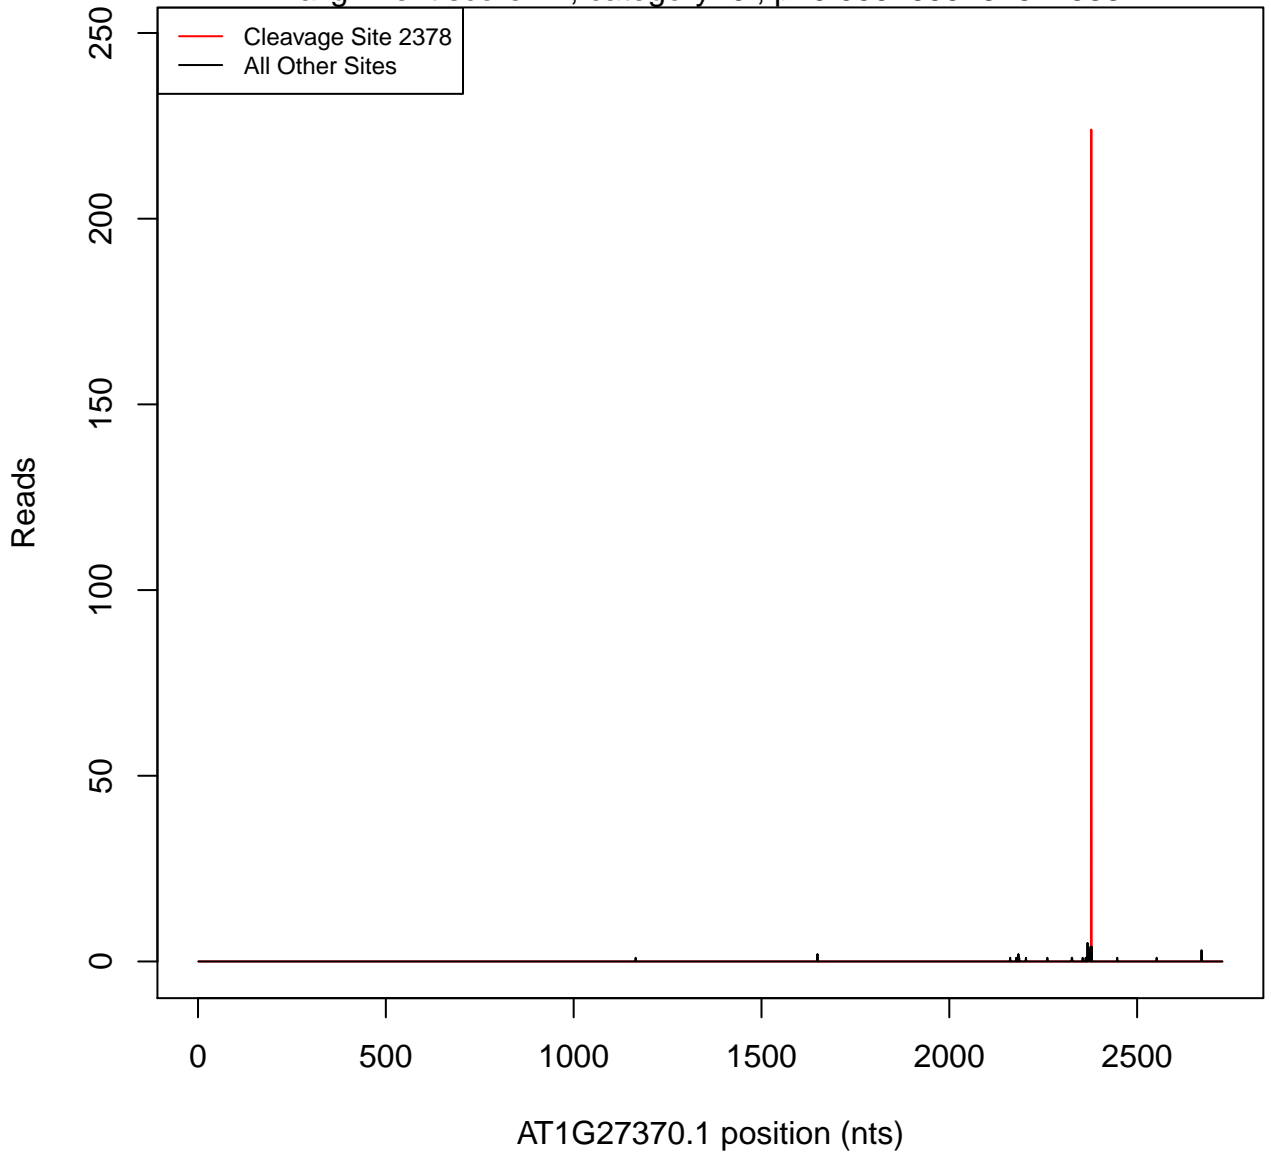

# ath-miR156b slicing AT1G27370.1 at nt 2378

alignment score=1 , category=0 , p=0.0592699262622588

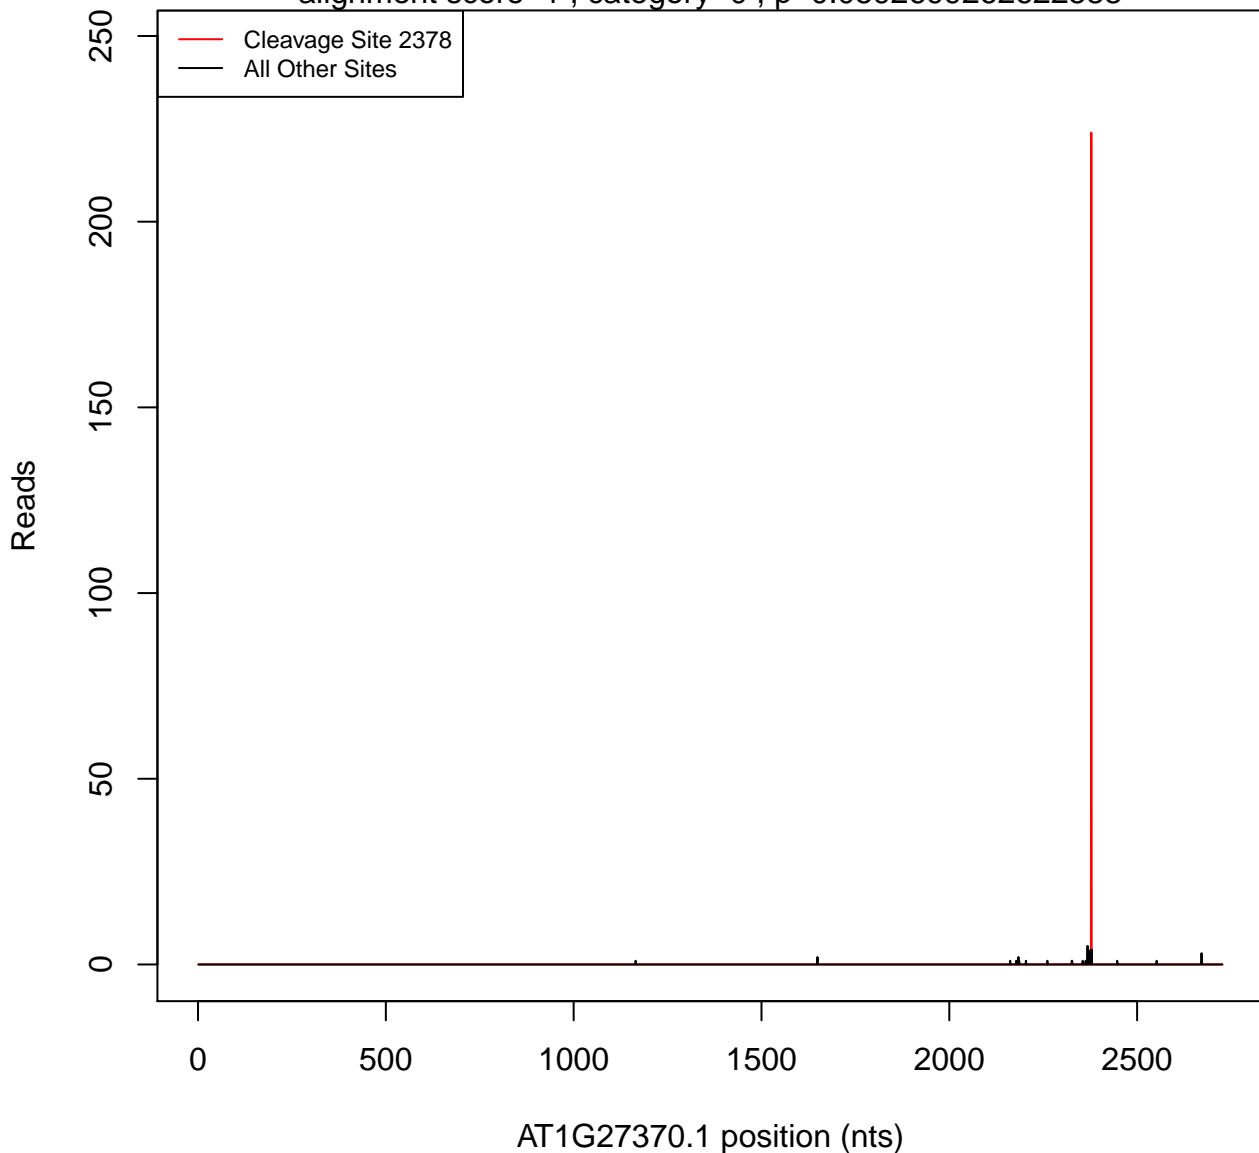

# ath-miR156c slicing AT1G27370.1 at nt 2378

alignment score=1 , category=0 , p=0.0592699262622588

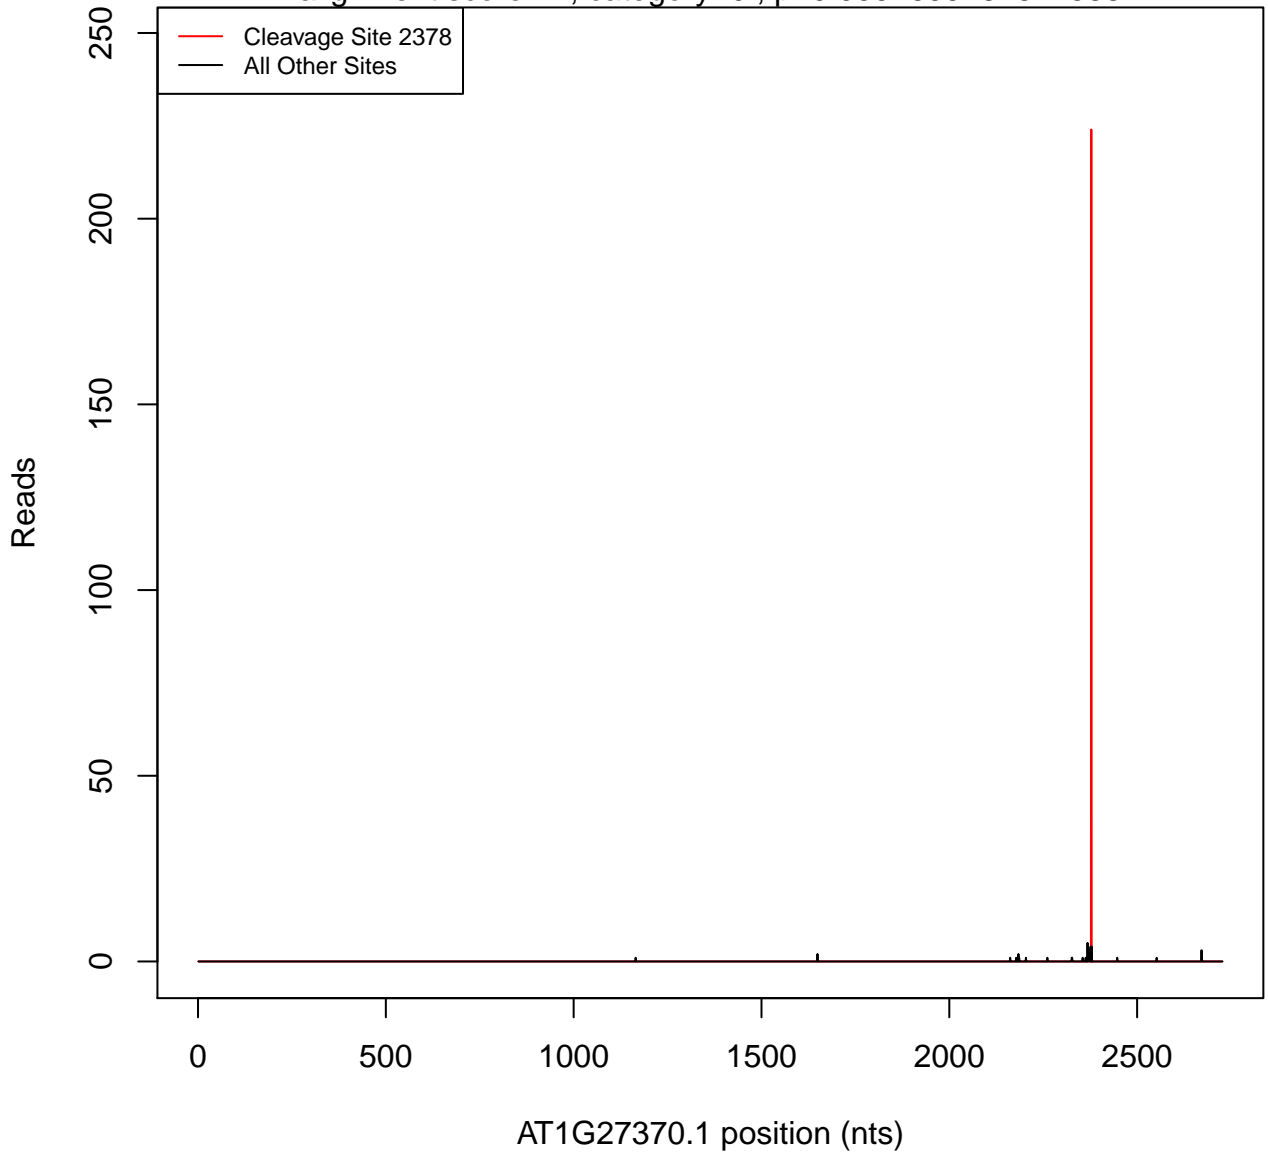



# ath-miR156d slicing AT1G27370.1 at nt 2378

alignment score=1 , category=0 , p=0.0592699262622588

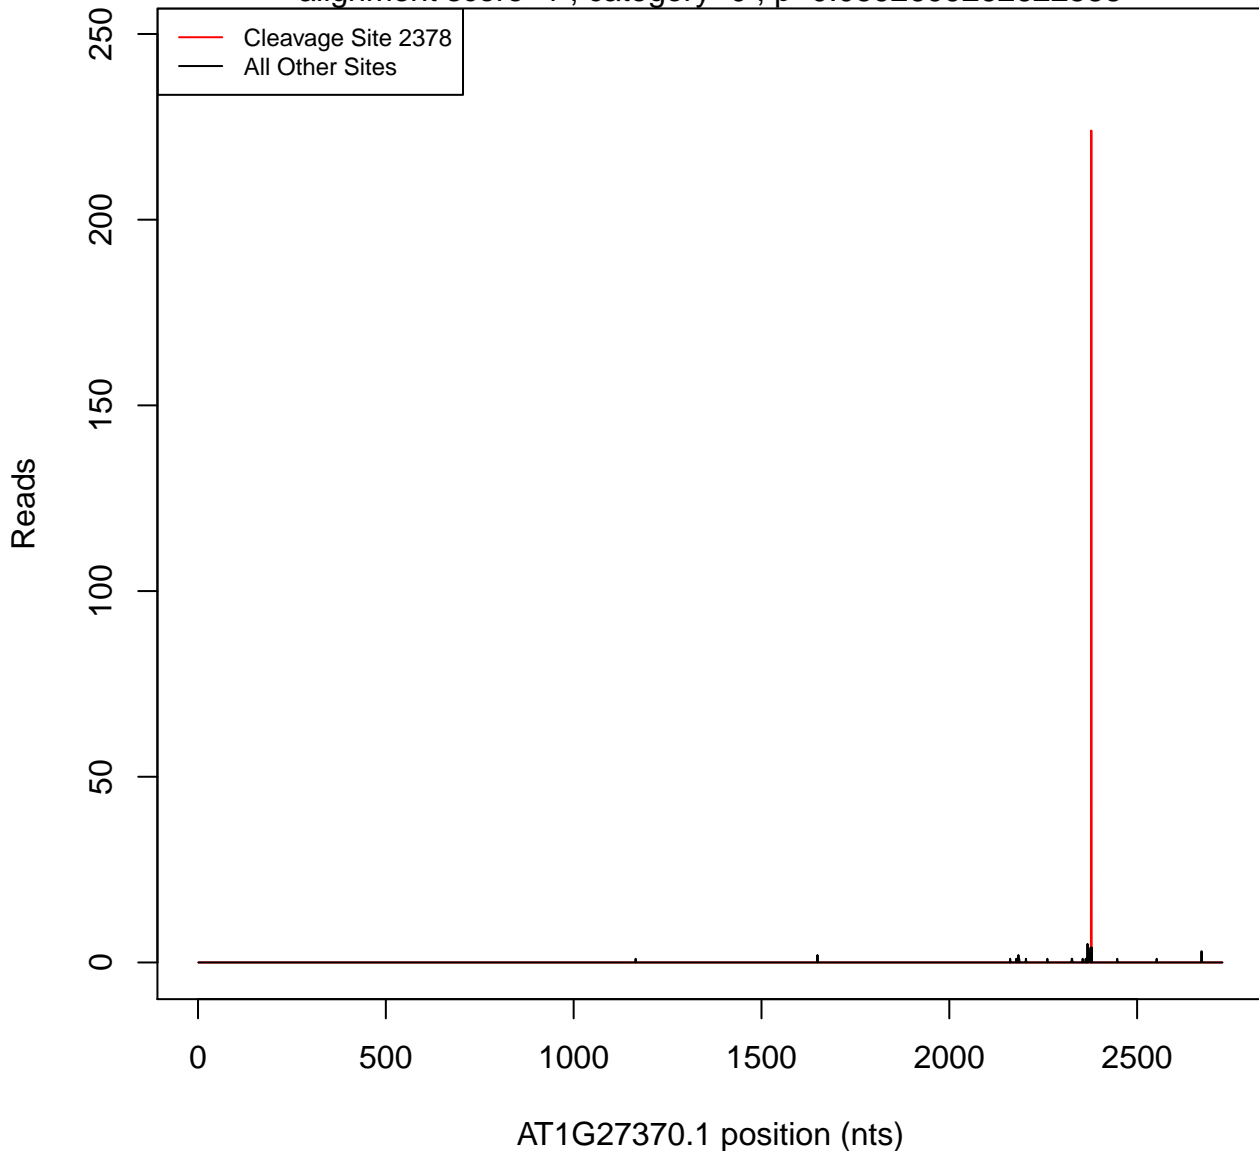

# ath-miR156e slicing AT1G27370.1 at nt 2378

alignment score=1 , category=0 , p=0.0592699262622588



# ath-miR156f slicing AT1G27370.1 at nt 2378

alignment score=1 , category=0 , p=0.0592699262622588



# ath-miR156g slicing AT1G27370.1 at nt 2378

alignment score=2 , category=0 , p=0.0503855131498749

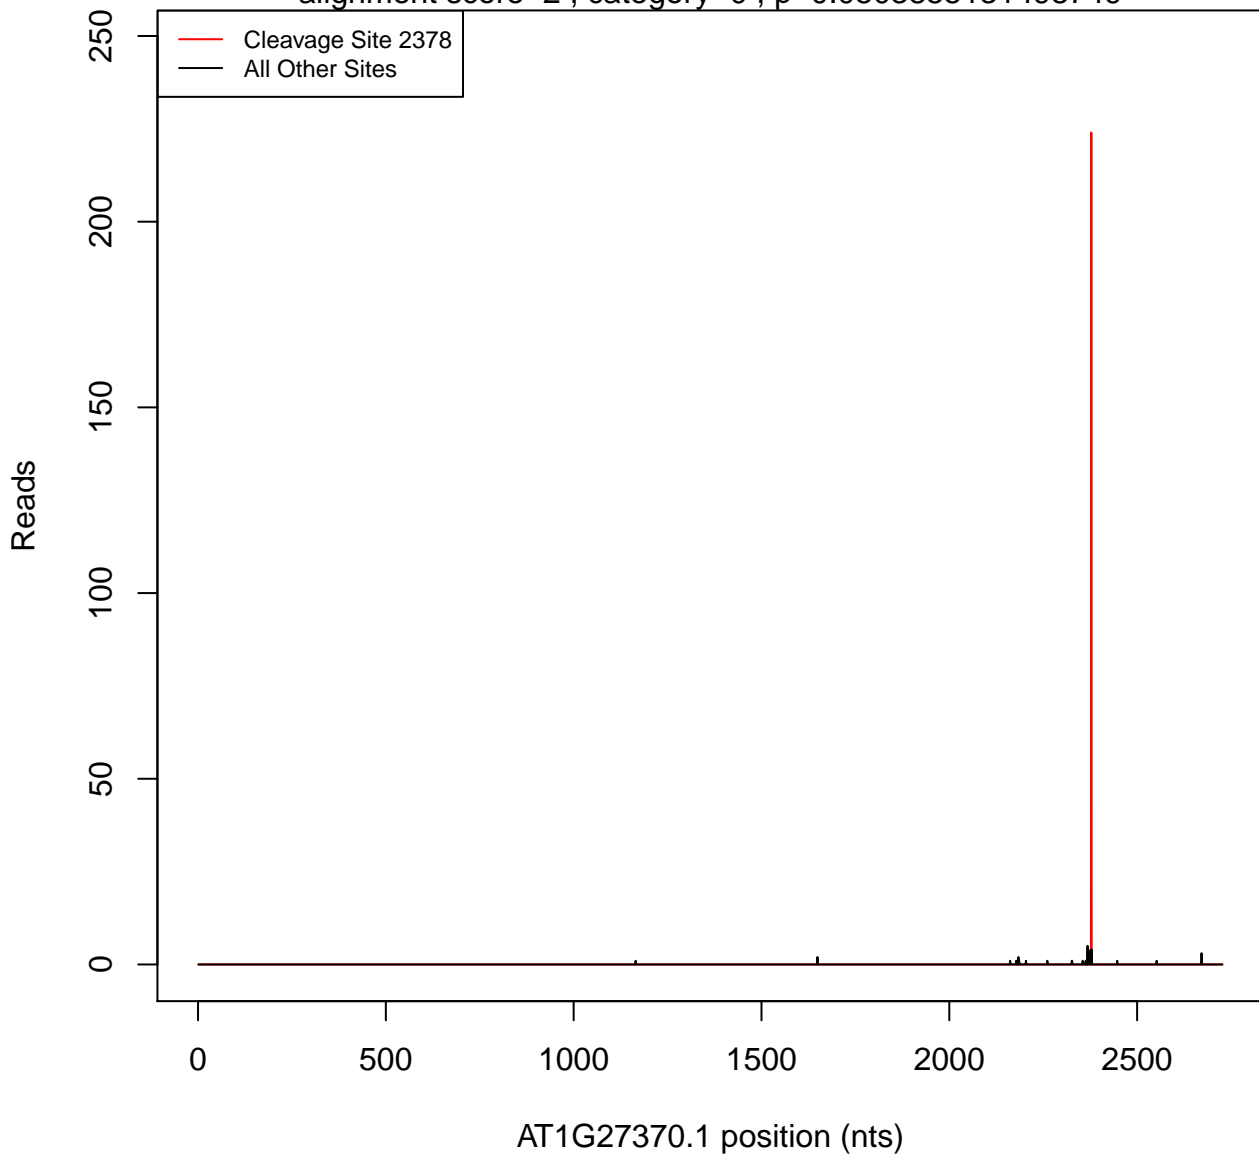

# ath-miR156h slicing AT1G27370.1 at nt 2378

alignment score=2 , category=0 , p=0.0561437826265823

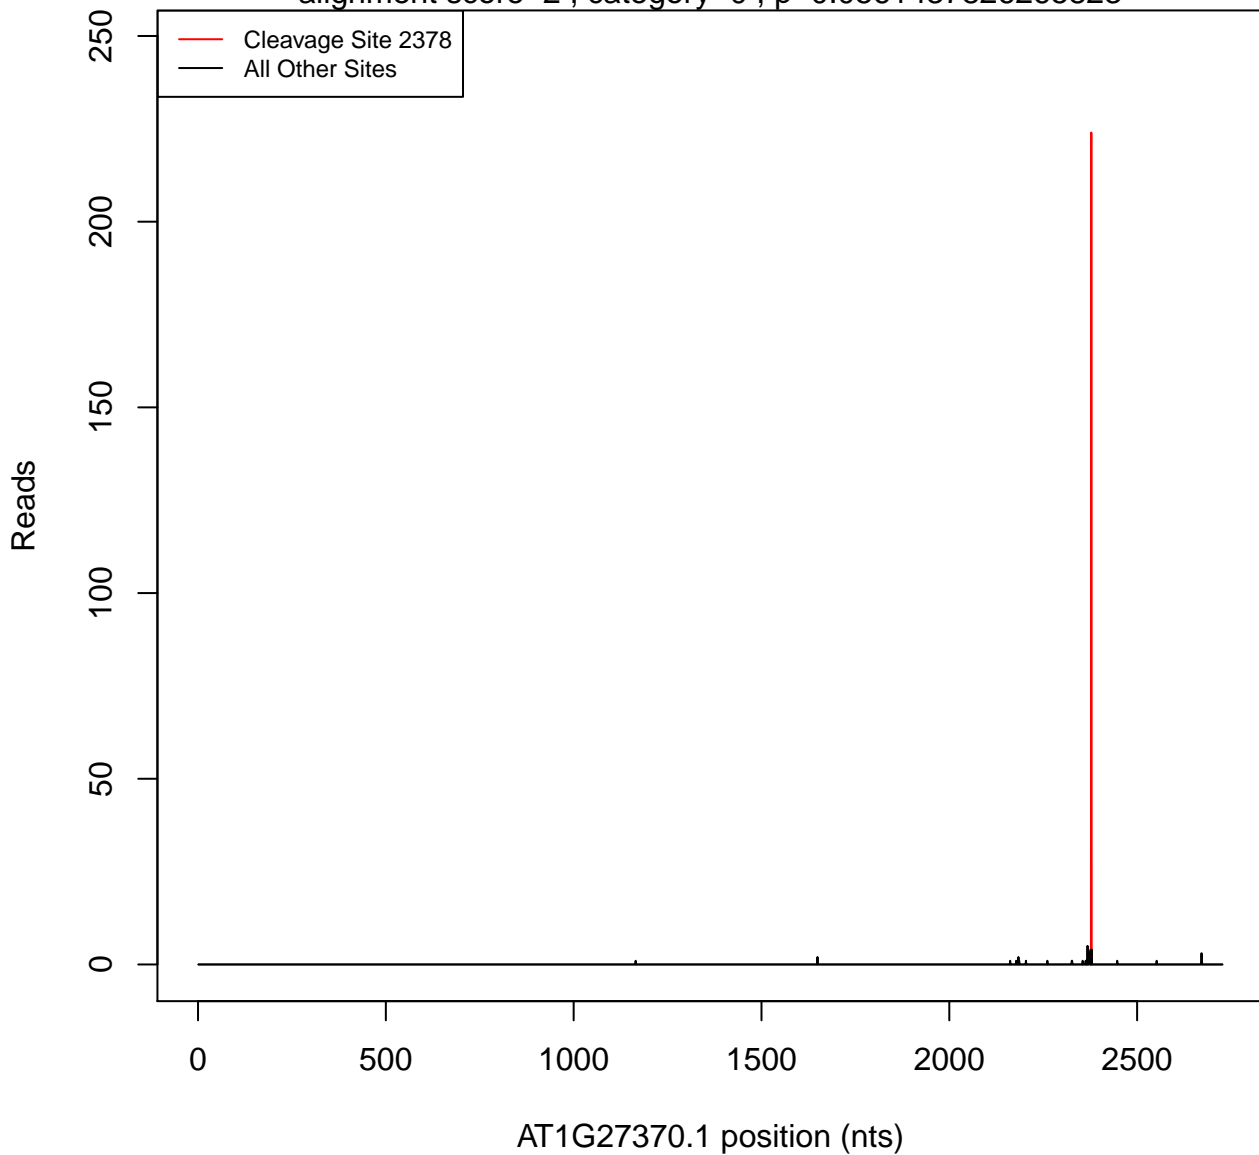

# ath-miR156i slicing AT1G27370.1 at nt 2378

alignment score=1 , category=0 , p=0.0626448986382654

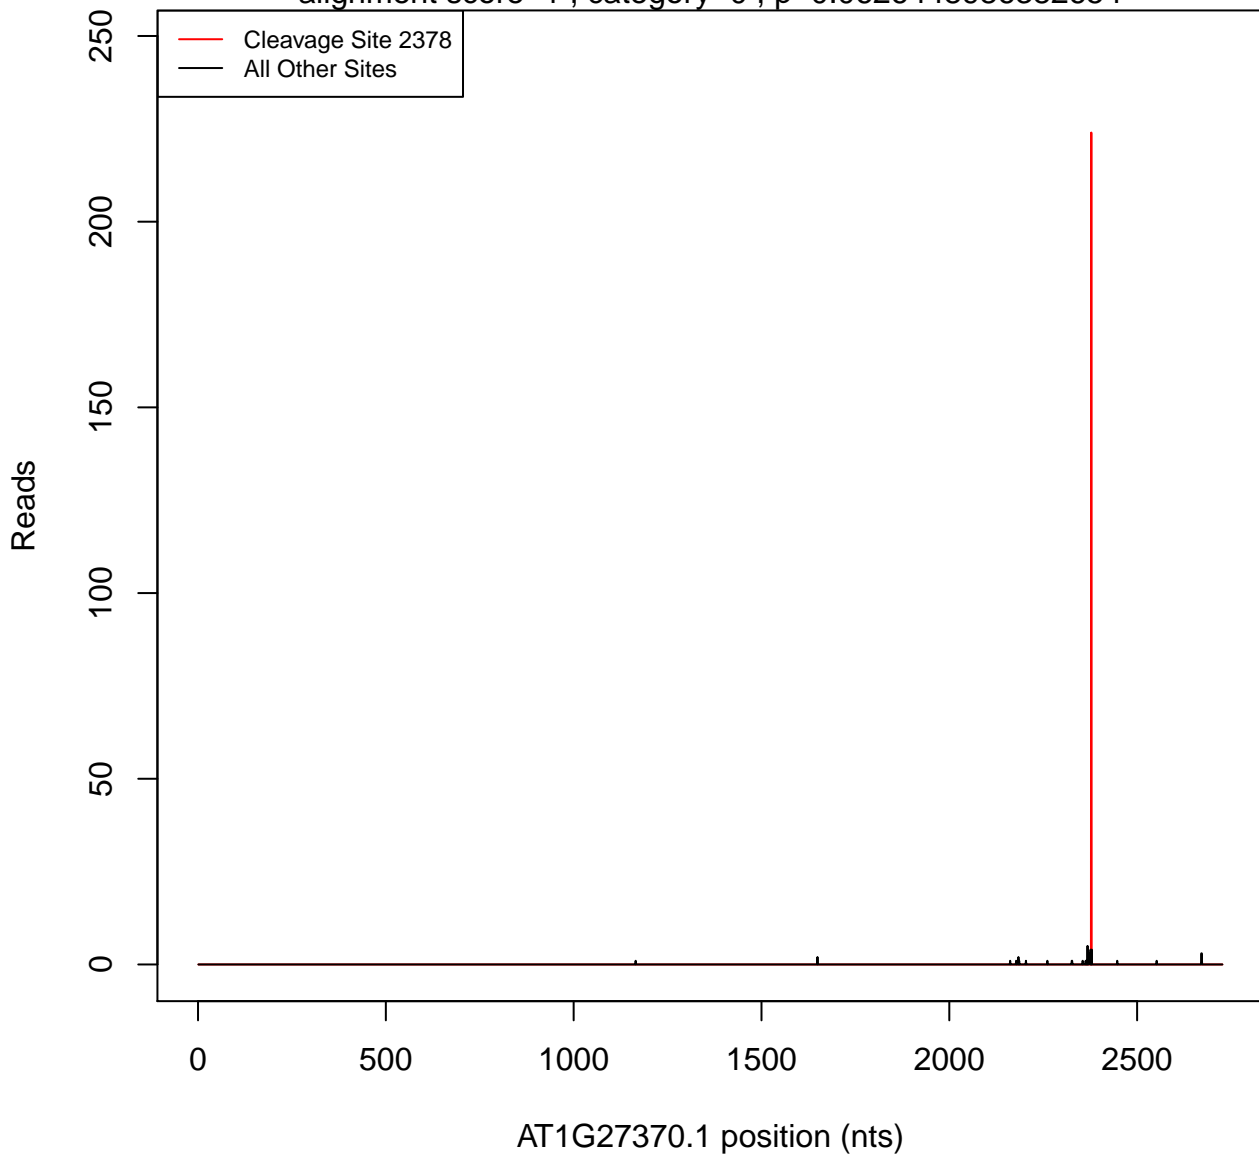

# ath-miR156j slicing AT1G27370.1 at nt 2378

alignment score=0 , category=0 , p=0.0680712184898578

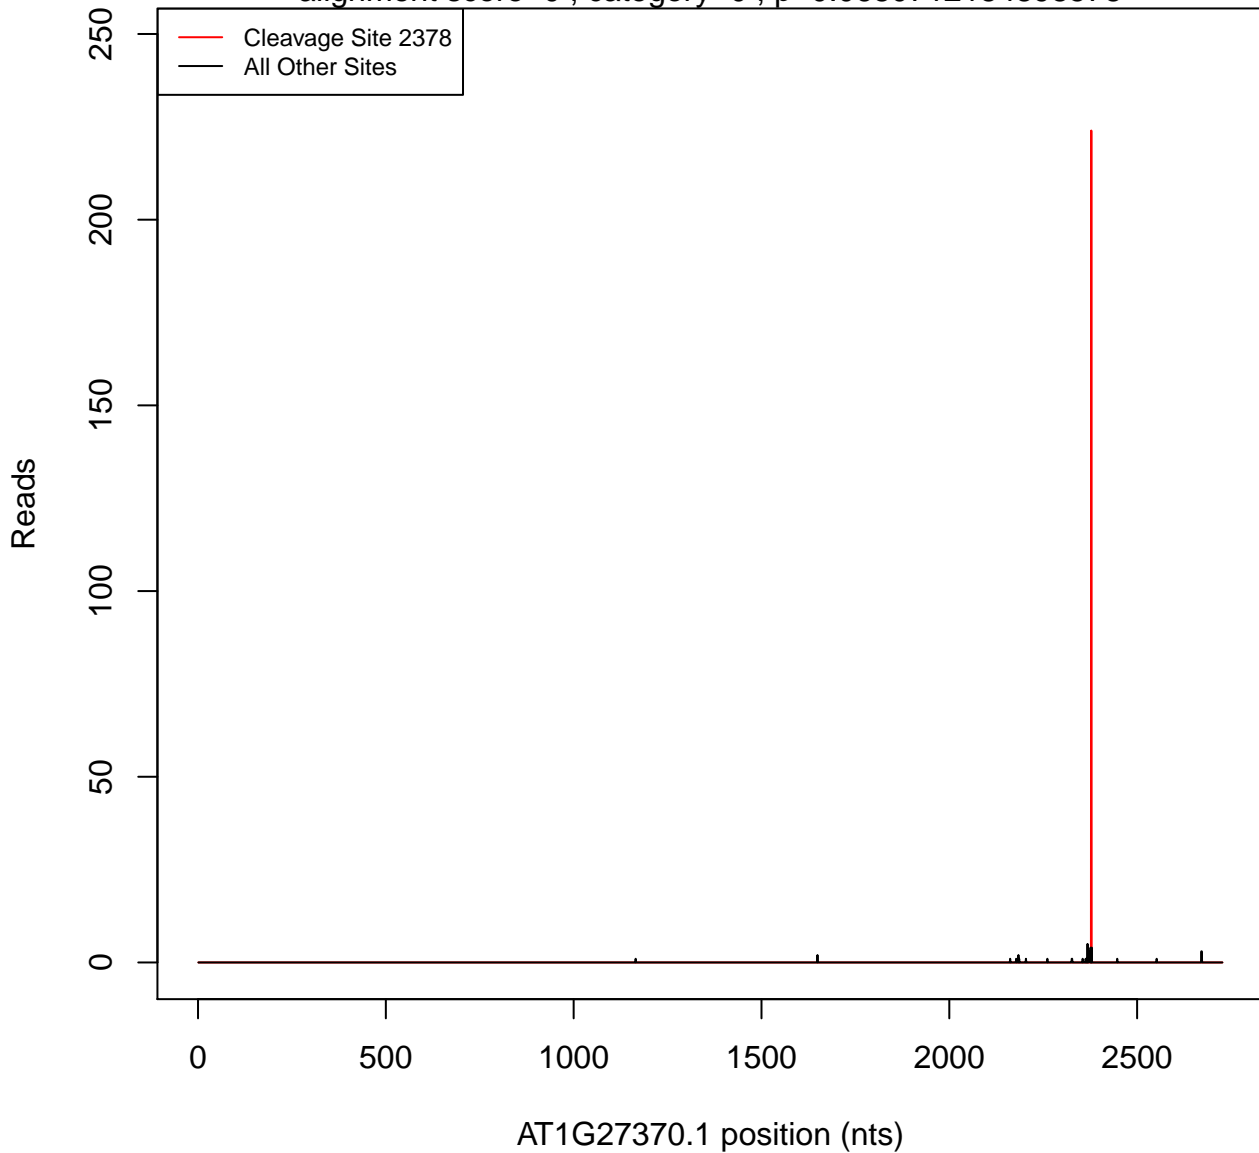

# ath-miR157d slicing AT1G27370.1 at nt 2378

alignment score=2 , category=0 , p=0.0561437826265823

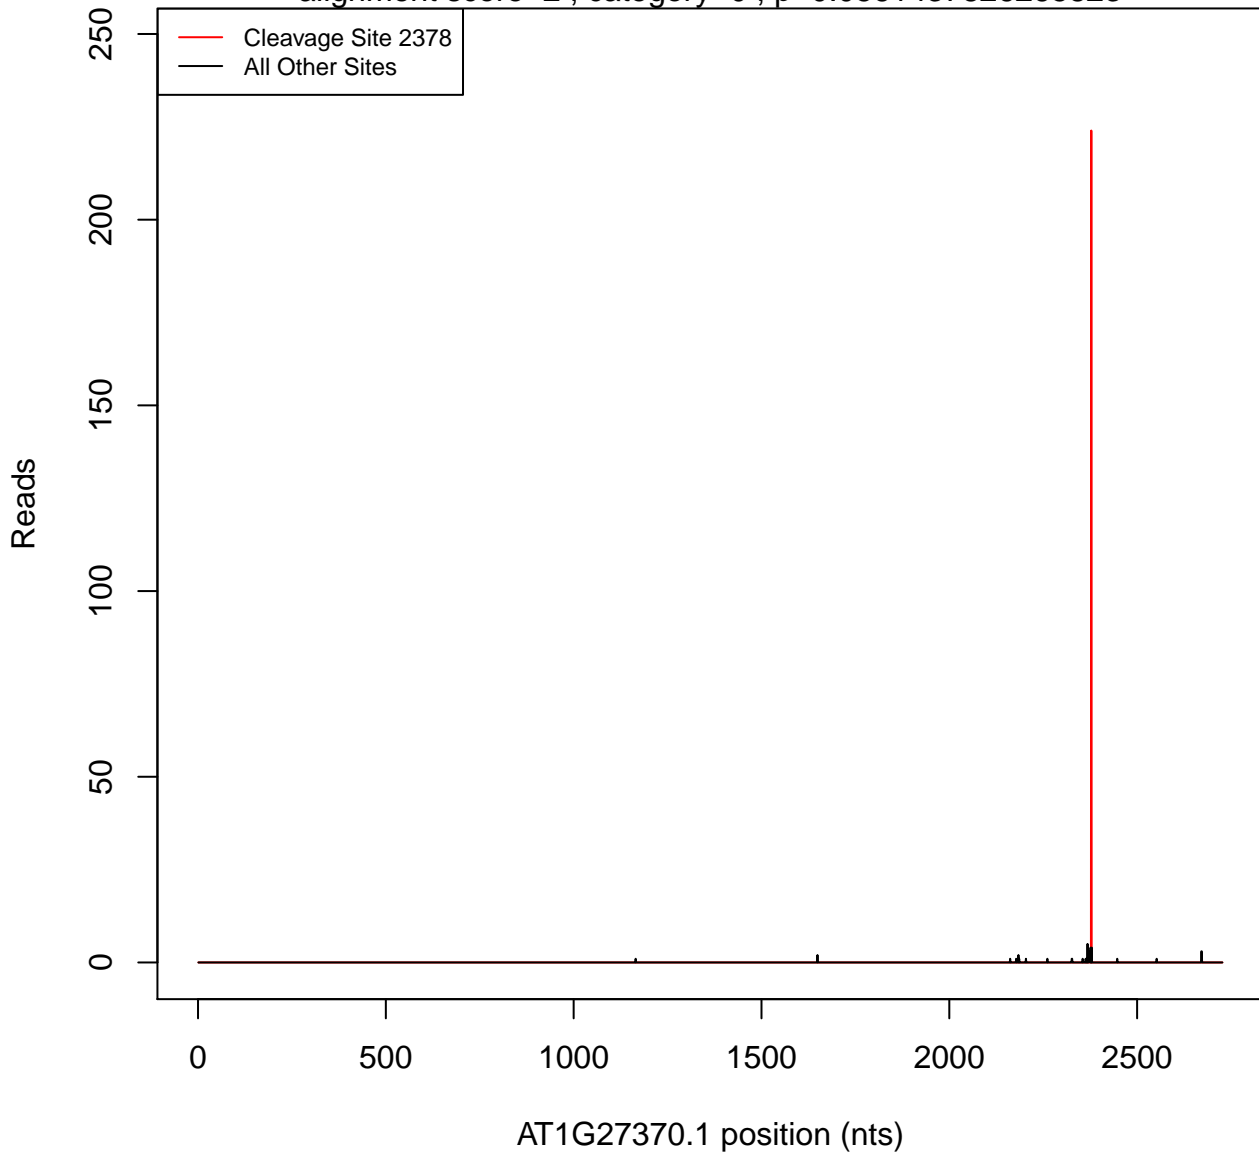



# ath-miR156a slicing AT1G27370.2 at nt 1456

alignment score=1 , category=0 , p=0.0592699262622588

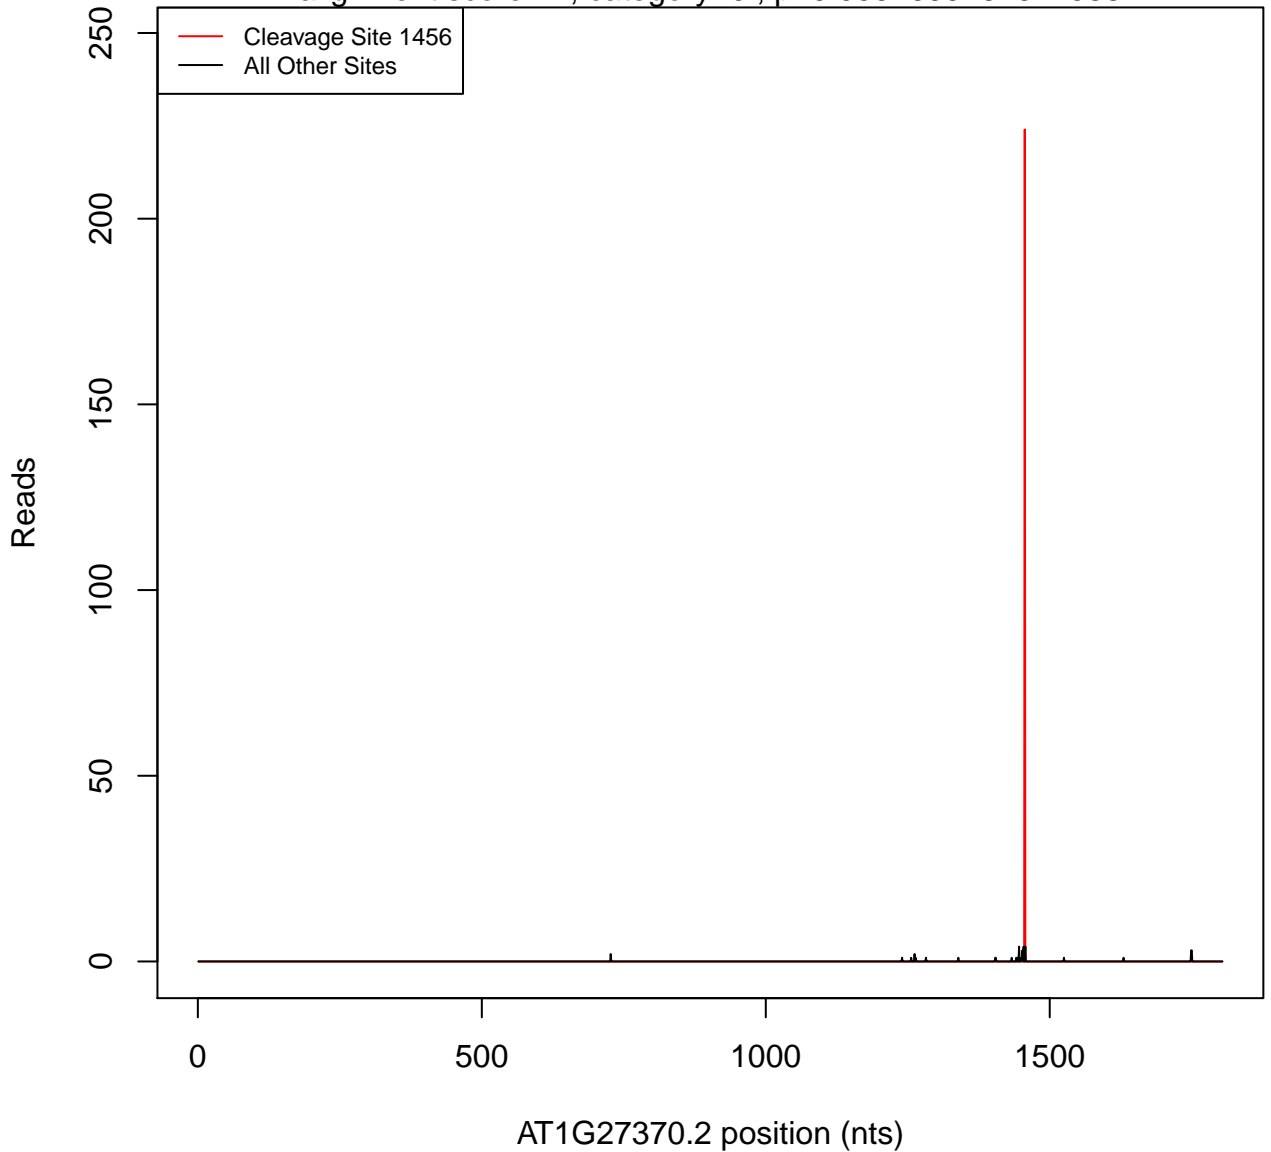

# ath-miR156b slicing AT1G27370.2 at nt 1456

alignment score=1 , category=0 , p=0.0592699262622588

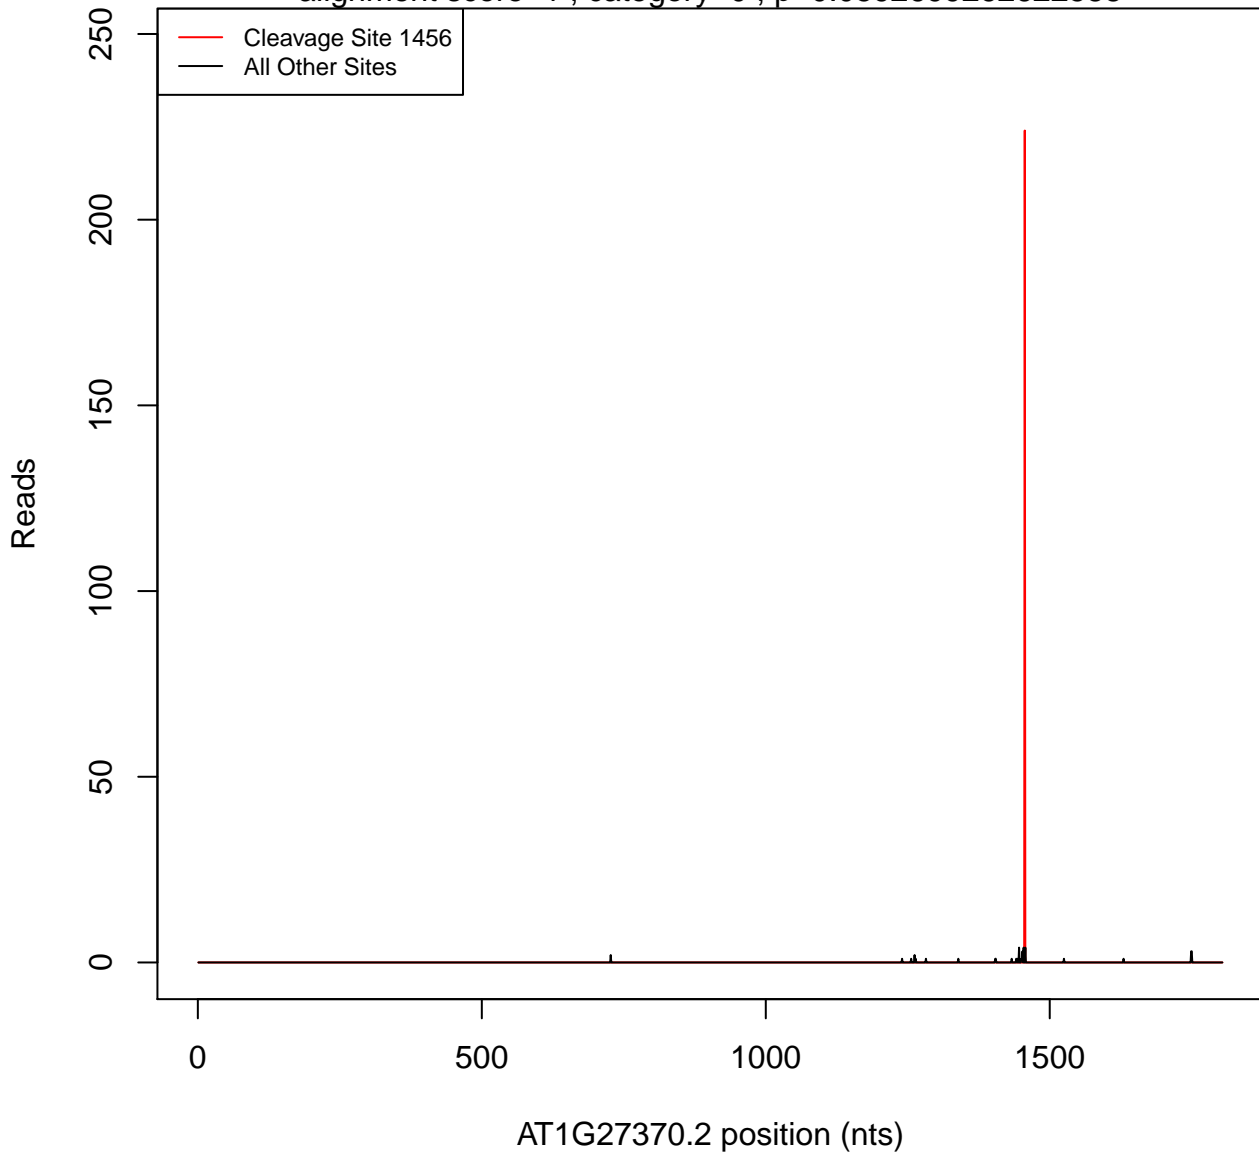

# ath-miR156c slicing AT1G27370.2 at nt 1456

alignment score=1 , category=0 , p=0.0592699262622588

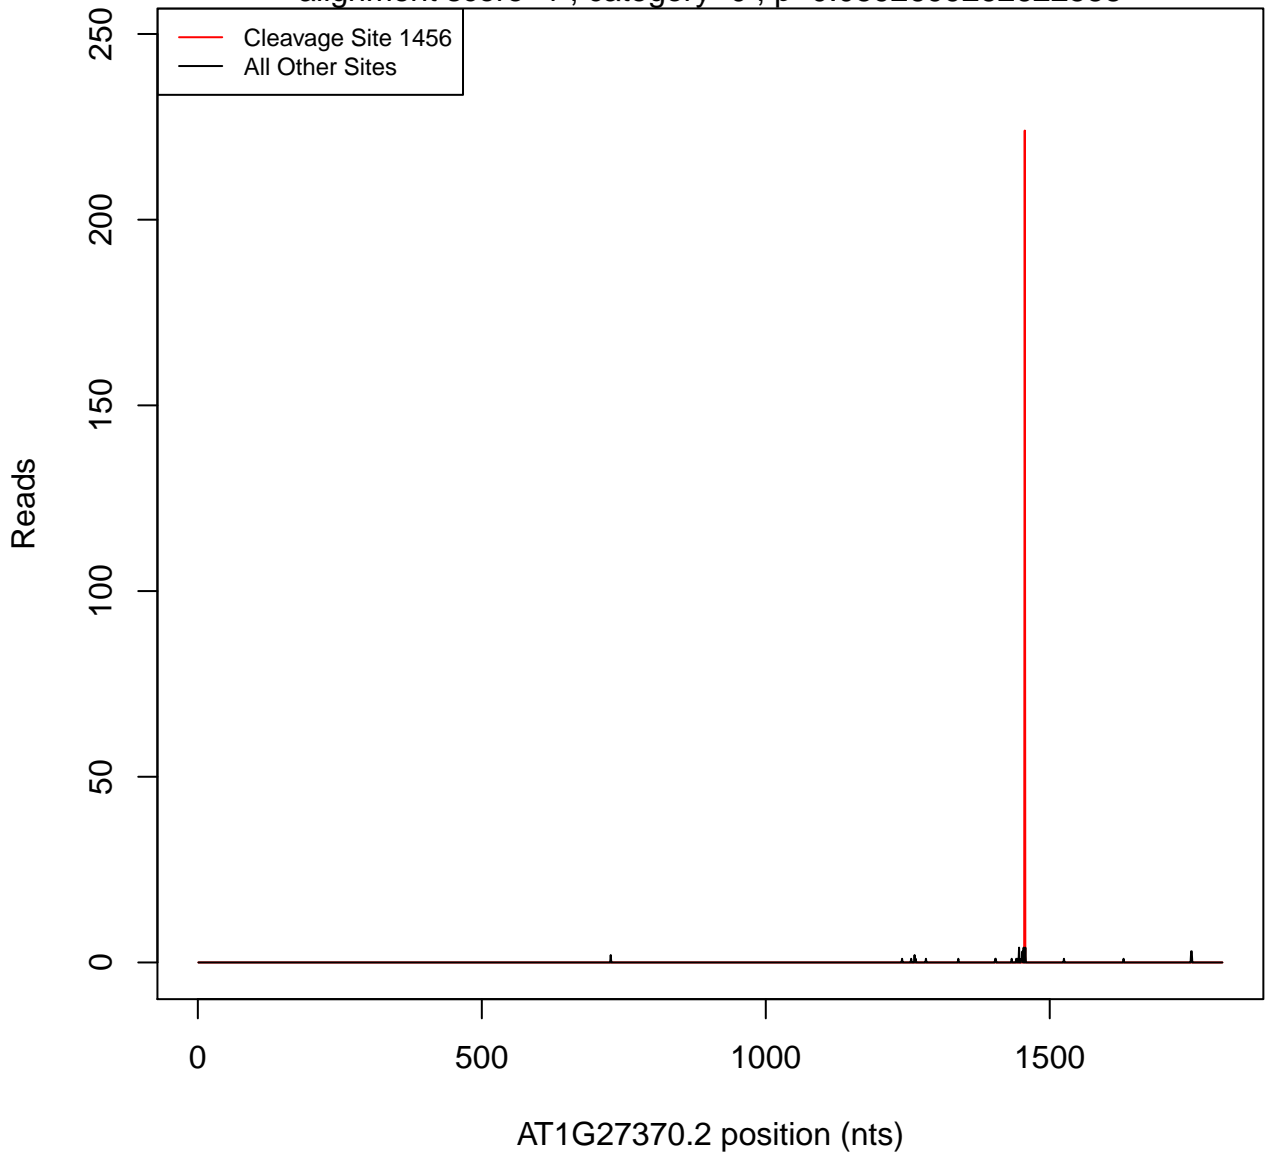

# ath-miR156d slicing AT1G27370.2 at nt 1456

alignment score=1 , category=0 , p=0.0592699262622588



# ath-miR156e slicing AT1G27370.2 at nt 1456

alignment score=1 , category=0 , p=0.0592699262622588



# ath-miR156f slicing AT1G27370.2 at nt 1456

alignment score=1 , category=0 , p=0.0592699262622588



# ath-miR156g slicing AT1G27370.2 at nt 1456

alignment score=2 , category=0 , p=0.0503855131498749

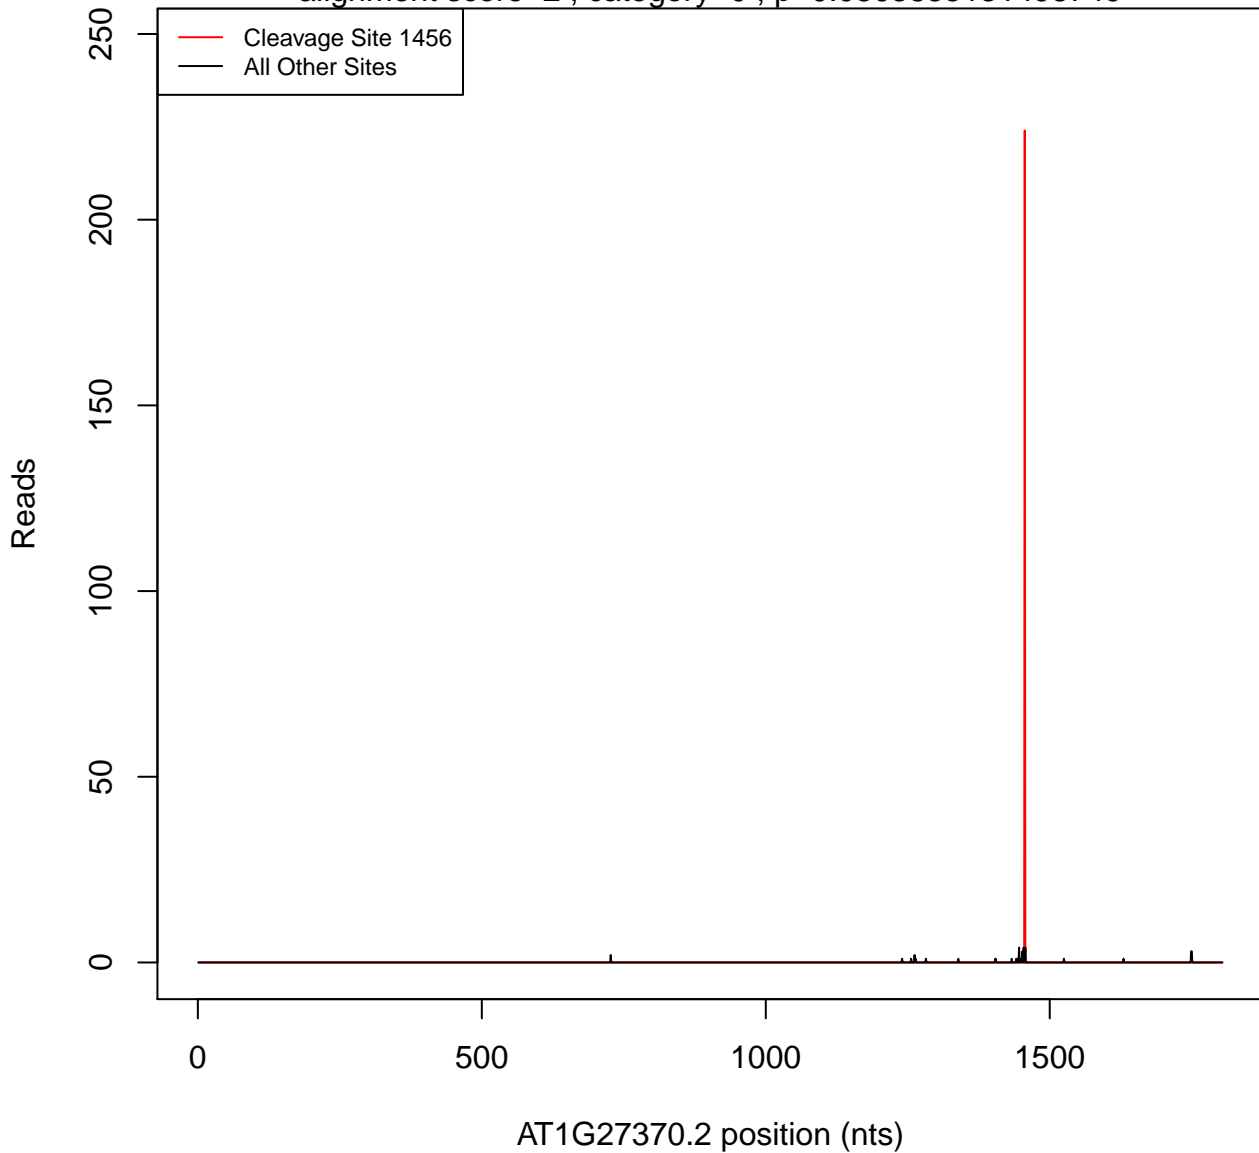

# ath-miR156h slicing AT1G27370.2 at nt 1456

alignment score=2 , category=0 , p=0.0561437826265823

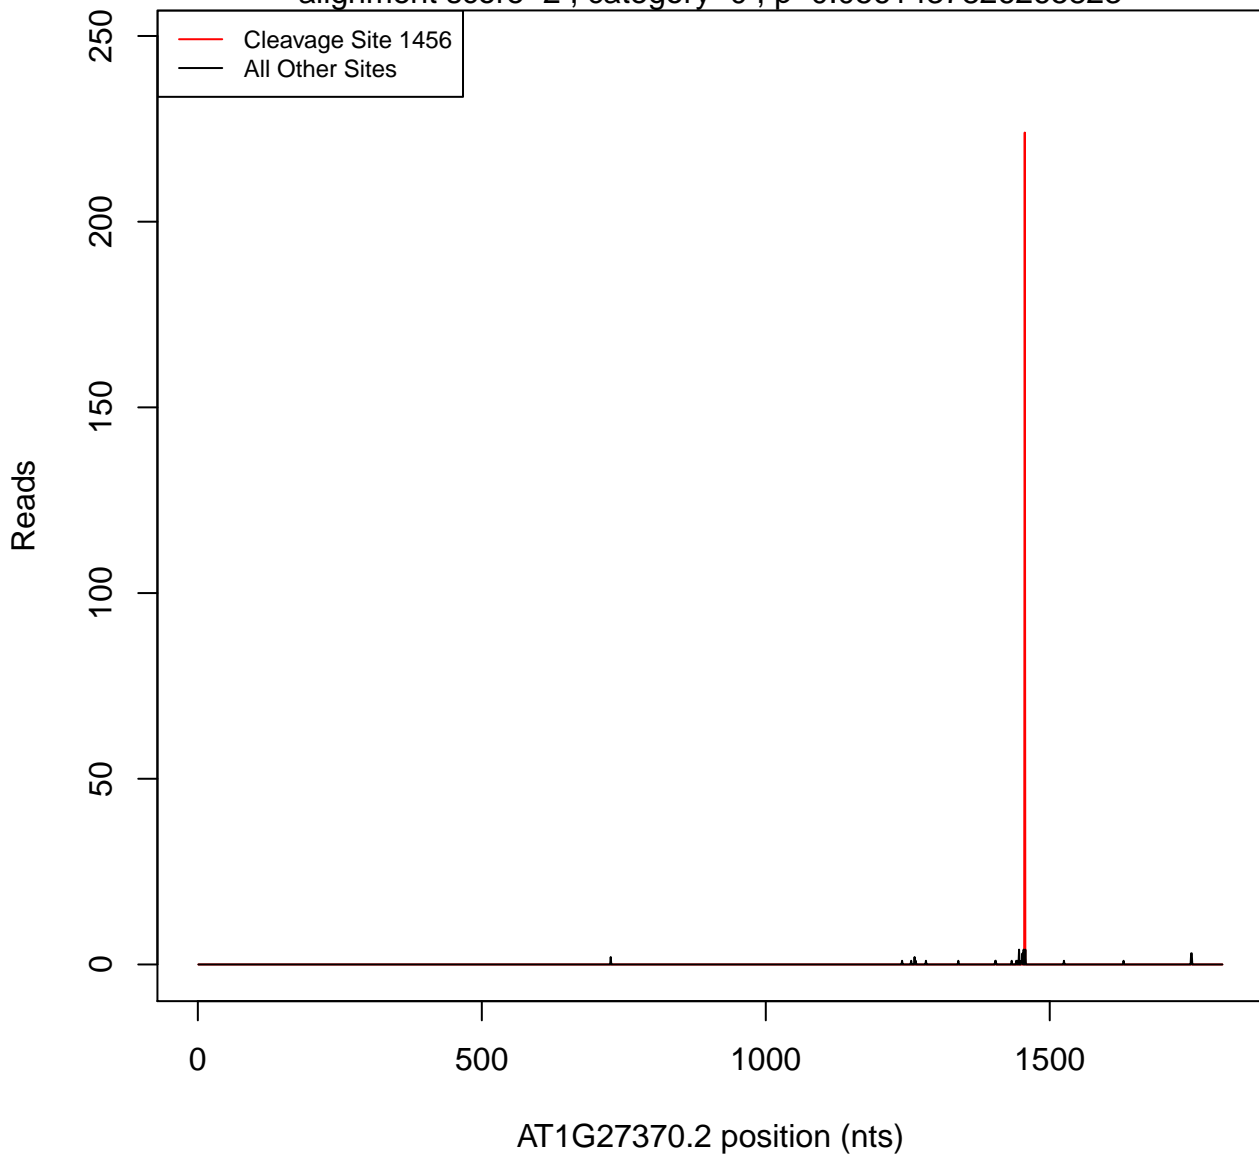



# ath-miR156i slicing AT1G27370.2 at nt 1456

alignment score=1 , category=0 , p=0.0626448986382654

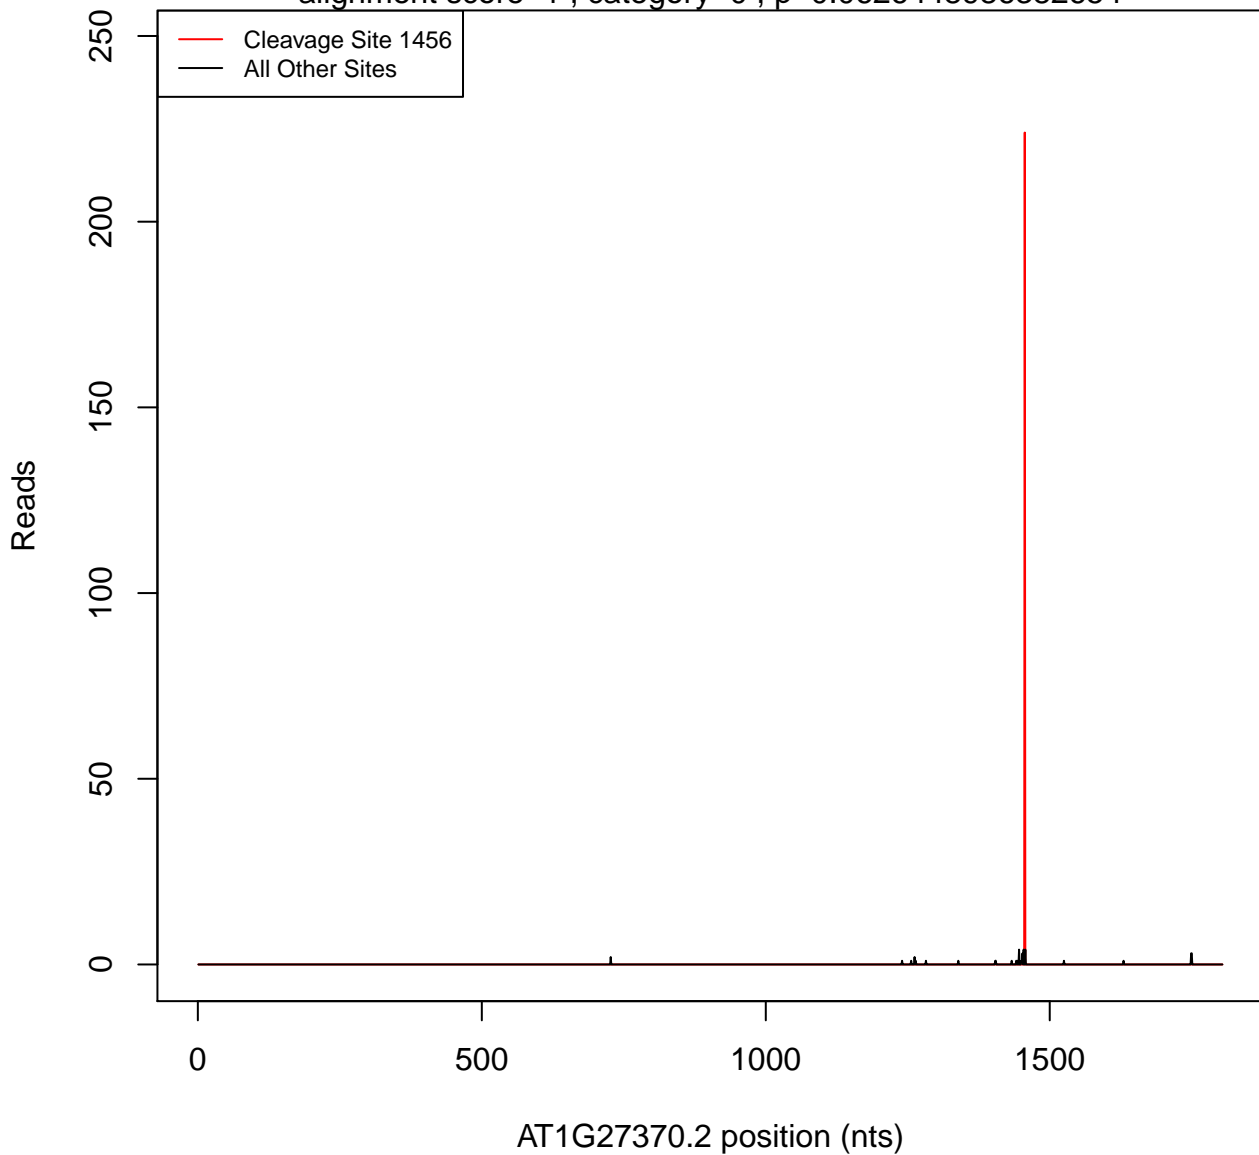

# ath-miR156j slicing AT1G27370.2 at nt 1456

alignment score=0 , category=0 , p=0.0680712184898578

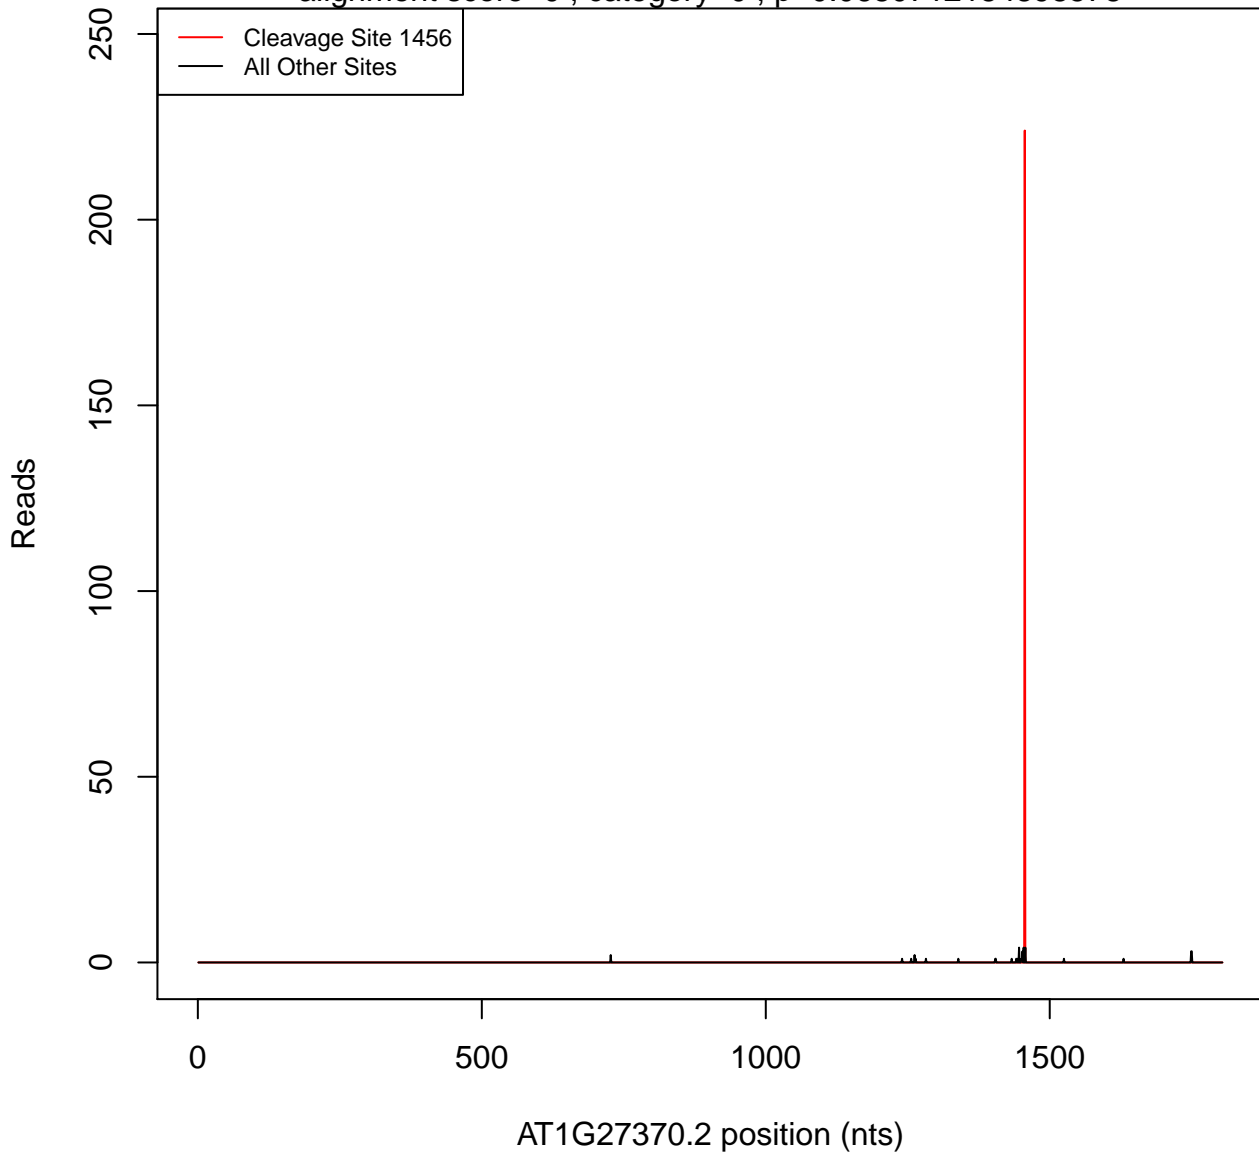

# ath-miR157d slicing AT1G27370.2 at nt 1456

alignment score=2 , category=0 , p=0.0561437826265823

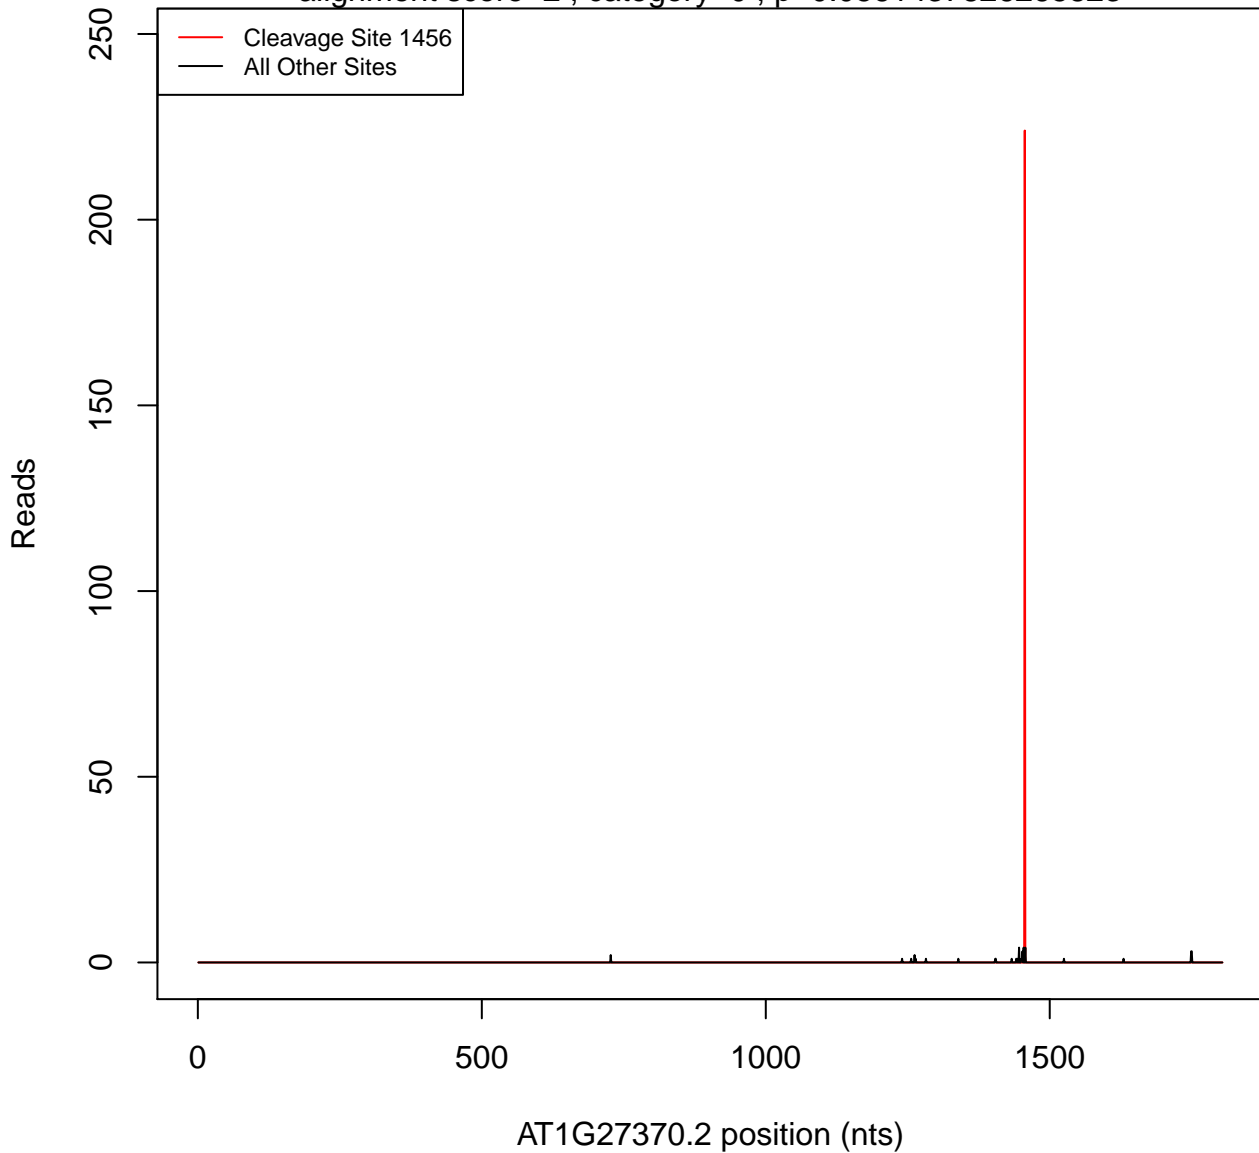

# ath-miR156a slicing AT1G27370.3 at nt 1238

alignment score=1 , category=0 , p=0.0592699262622588

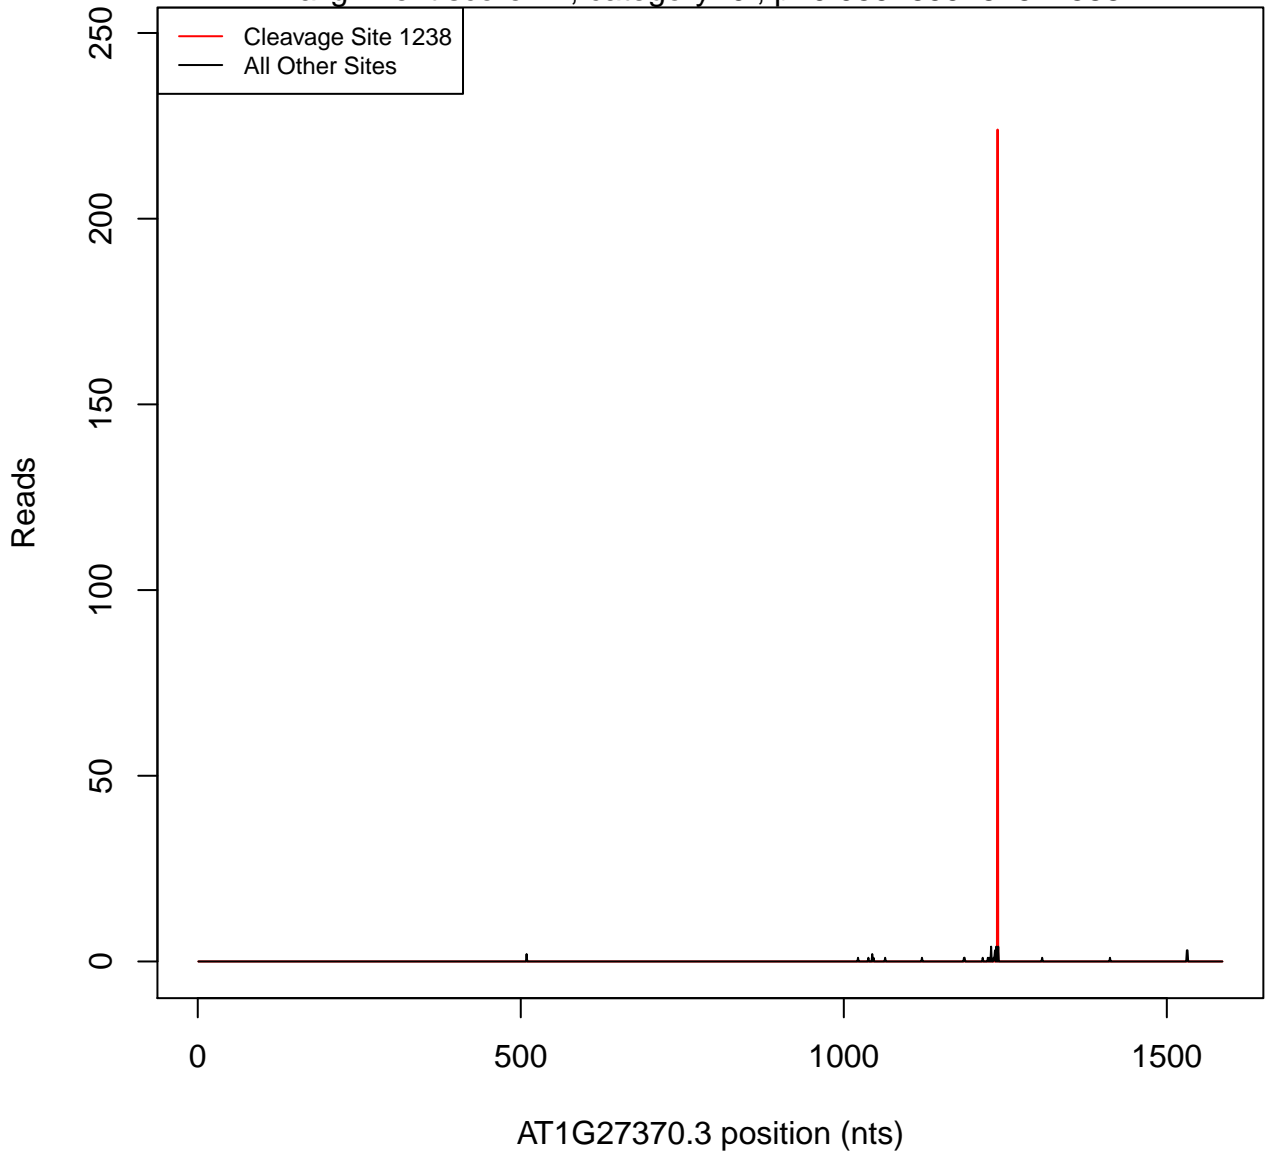

# ath-miR156b slicing AT1G27370.3 at nt 1238

alignment score=1 , category=0 , p=0.0592699262622588

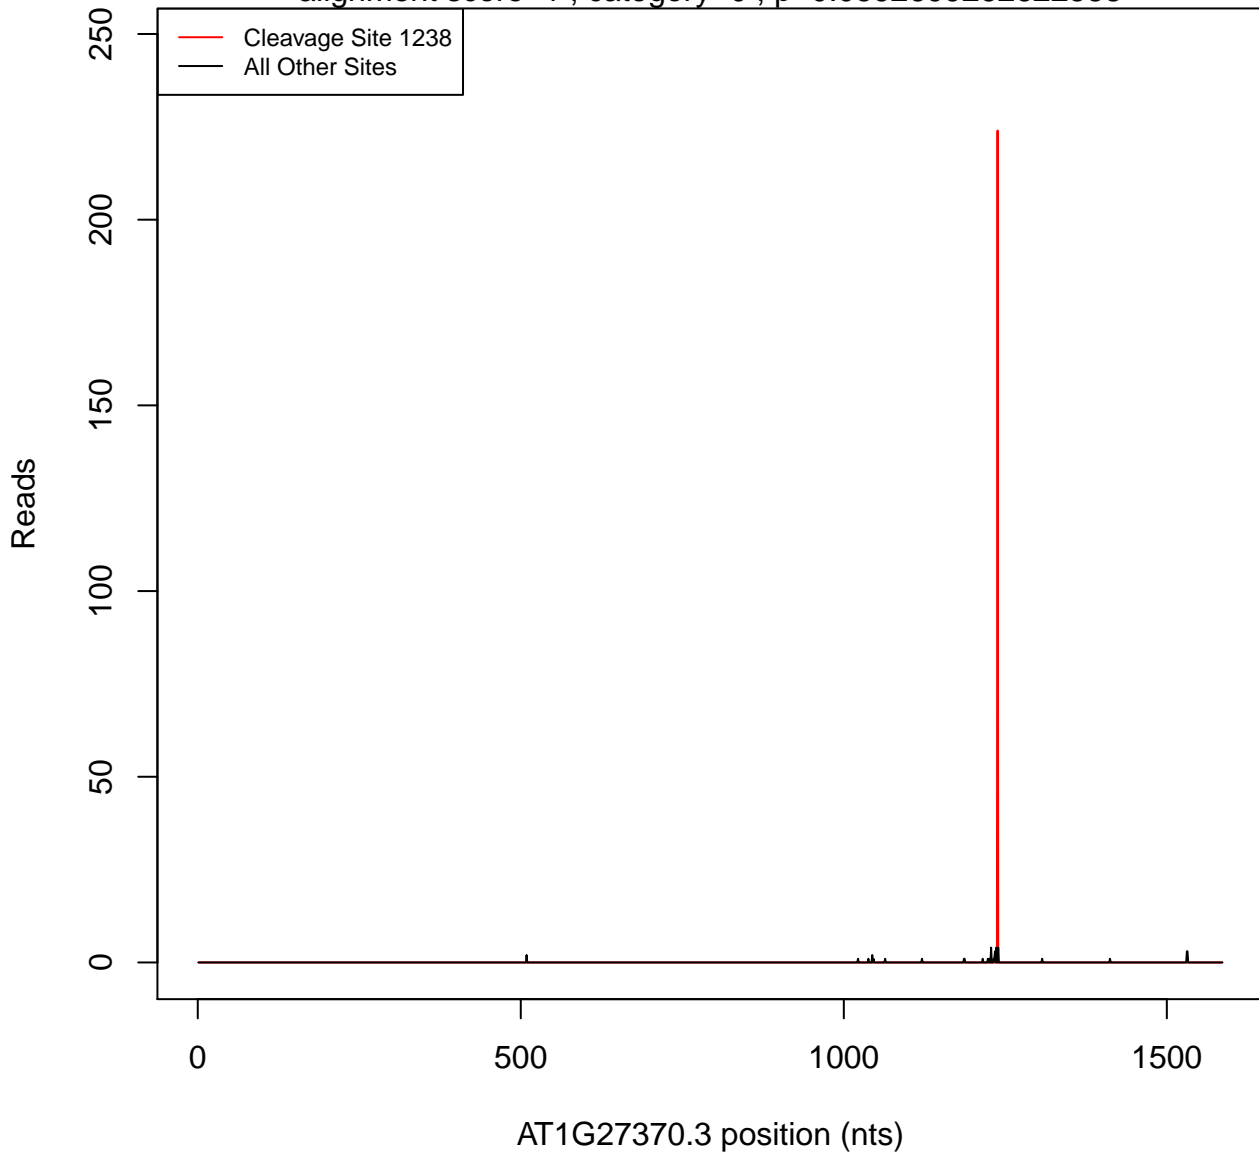

# ath-miR156c slicing AT1G27370.3 at nt 1238

alignment score=1 , category=0 , p=0.0592699262622588



# ath-miR156d slicing AT1G27370.3 at nt 1238

alignment score=1 , category=0 , p=0.0592699262622588



# ath-miR156e slicing AT1G27370.3 at nt 1238

alignment score=1 , category=0 , p=0.0592699262622588

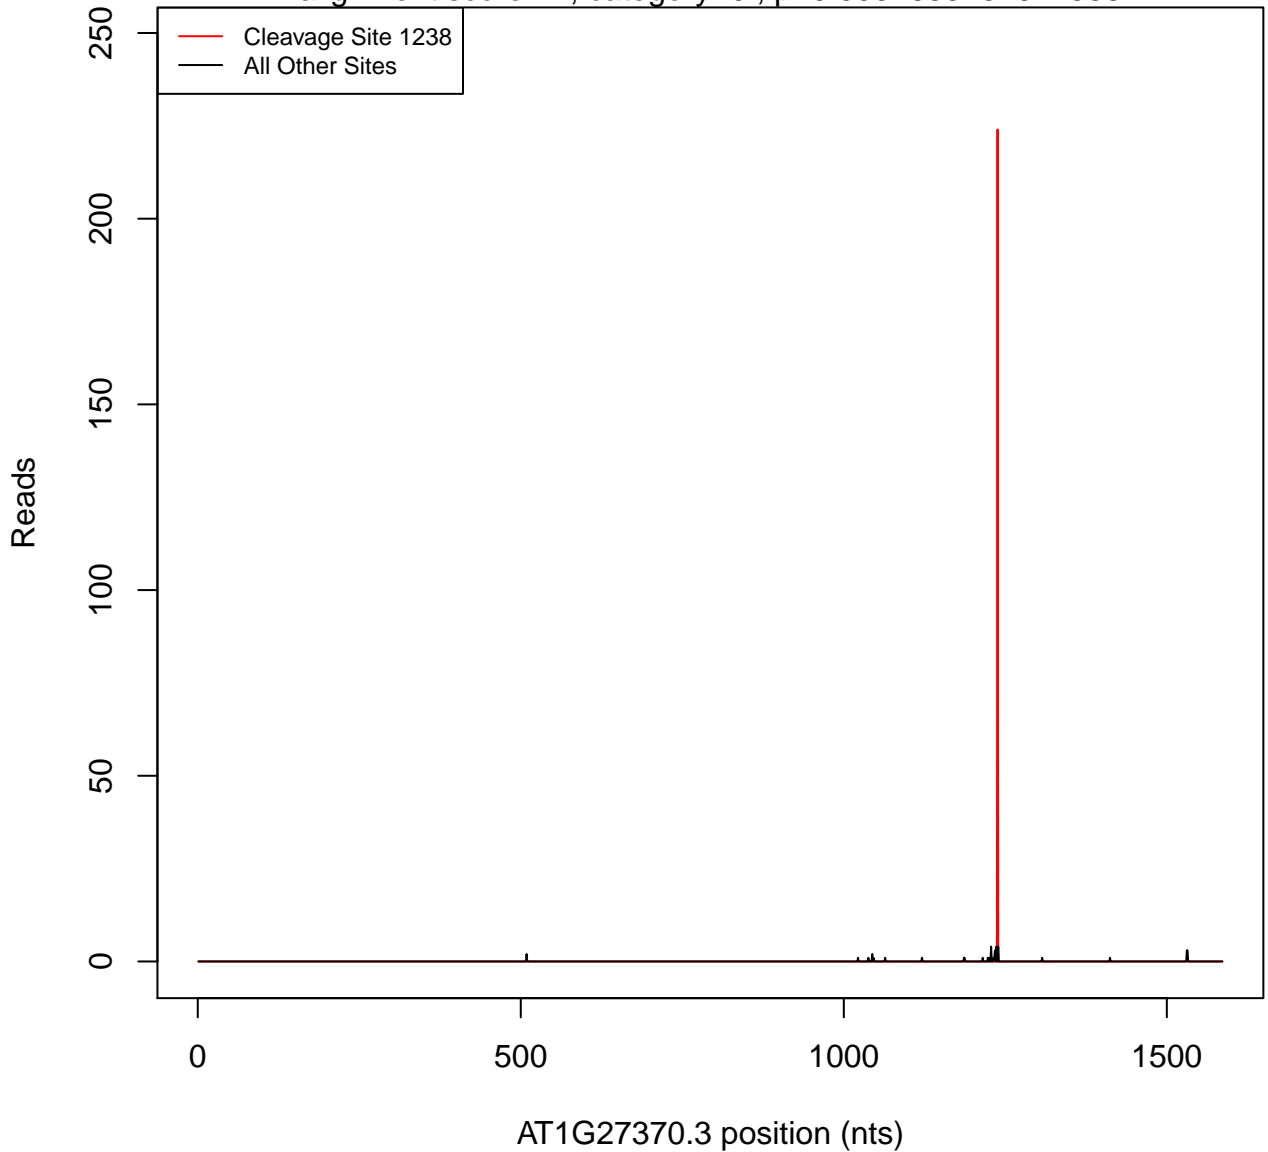



# ath-miR156f slicing AT1G27370.3 at nt 1238

alignment score=1 , category=0 , p=0.0592699262622588

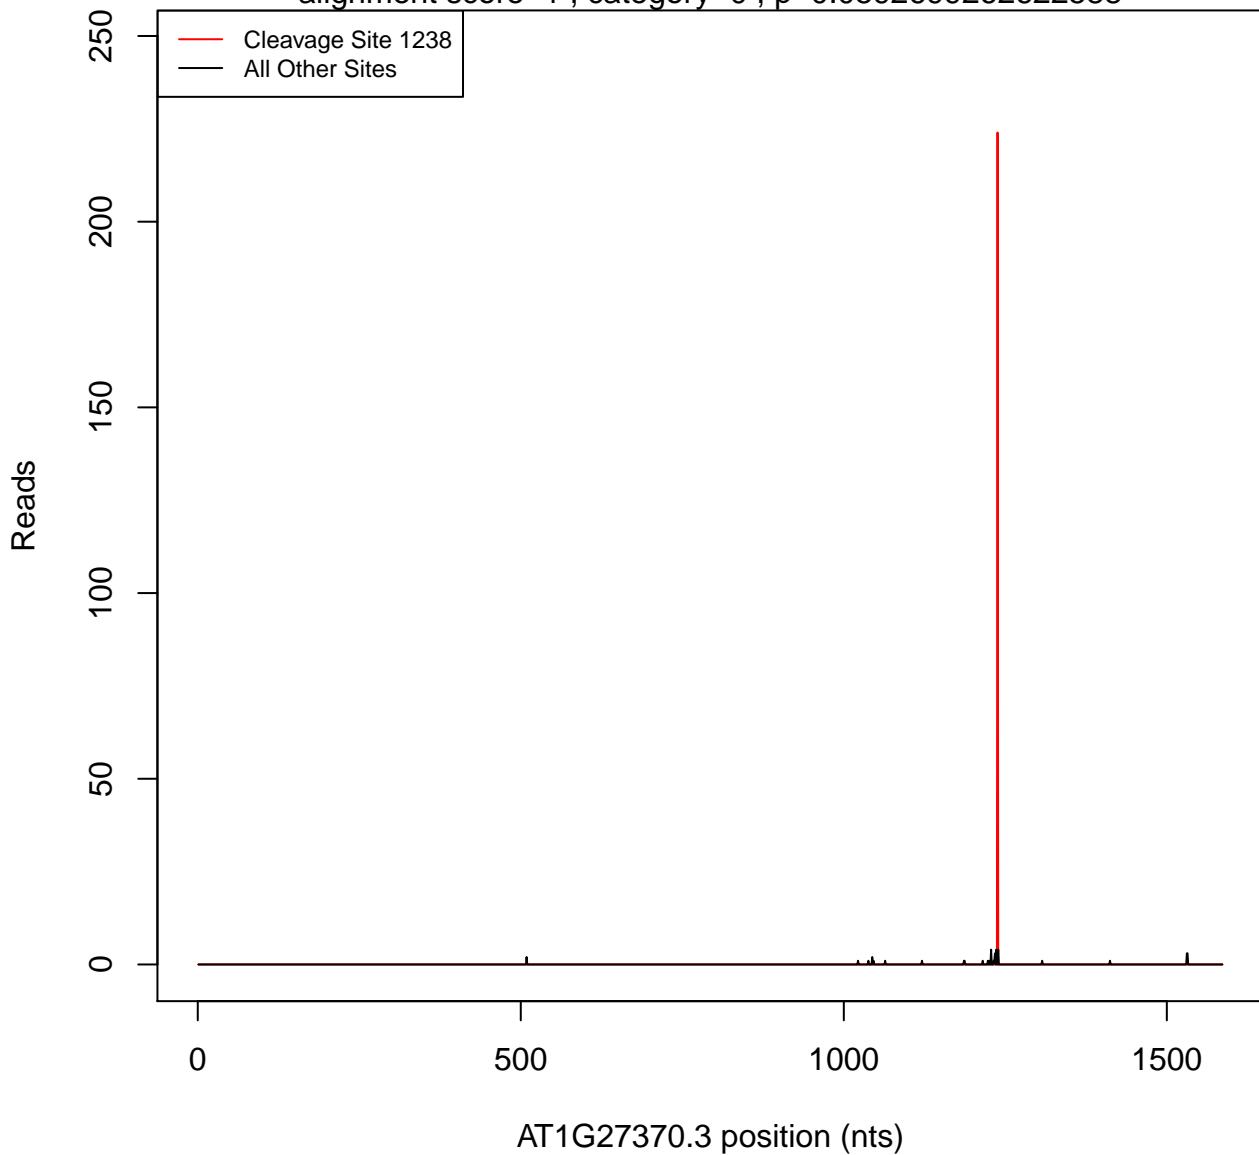

# ath-miR156g slicing AT1G27370.3 at nt 1238

alignment score=2 , category=0 , p=0.0503855131498749

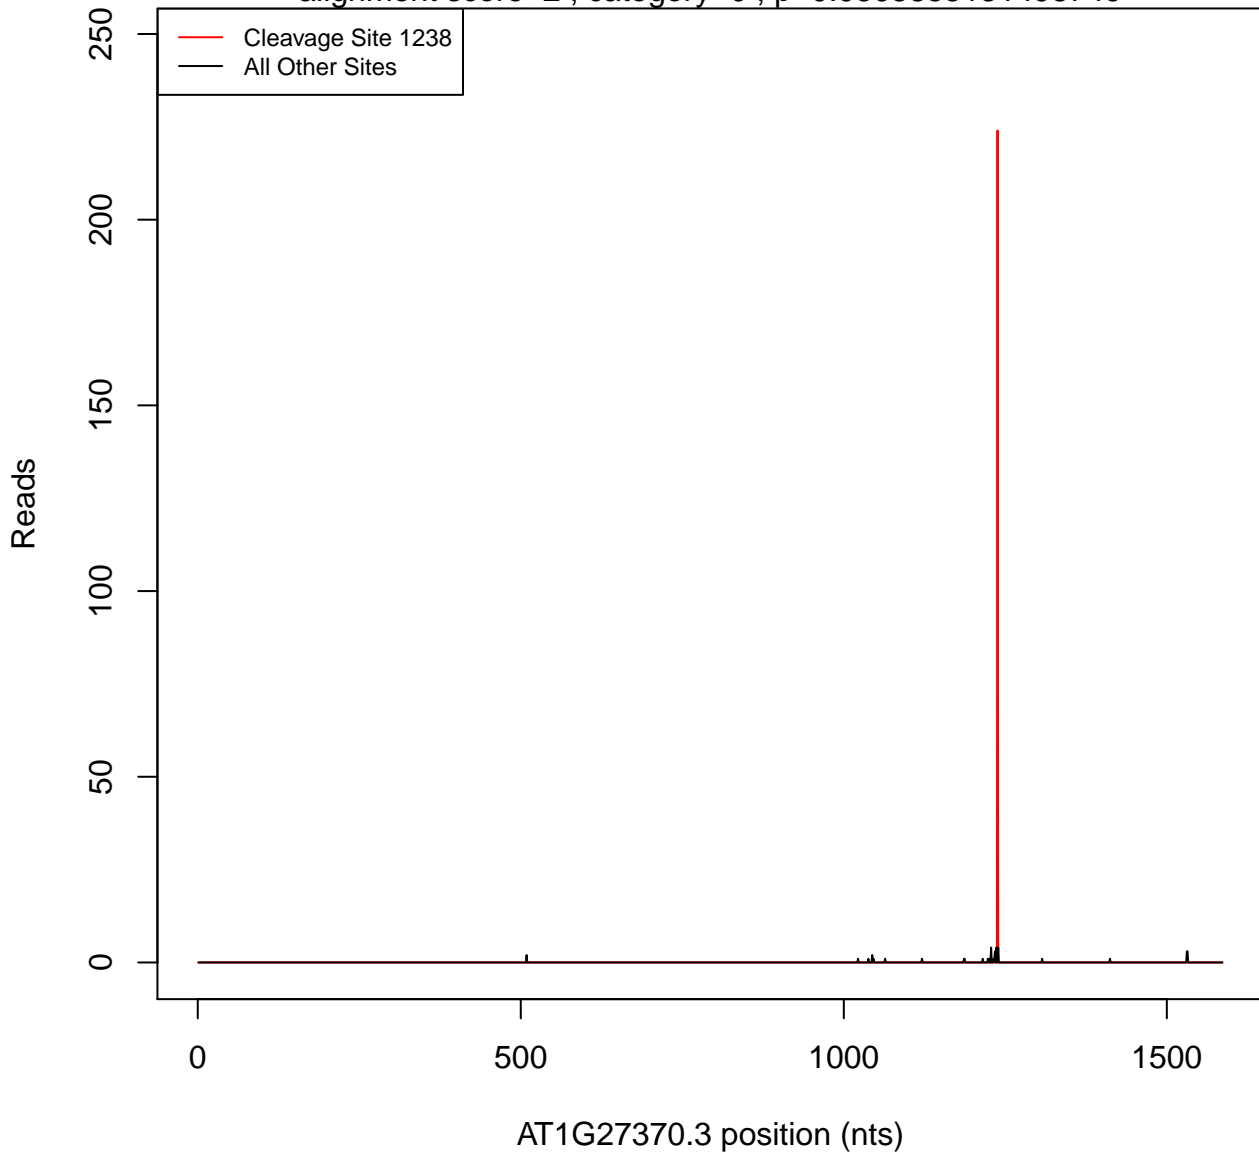

# ath-miR156h slicing AT1G27370.3 at nt 1238

alignment score=2 , category=0 , p=0.0561437826265823

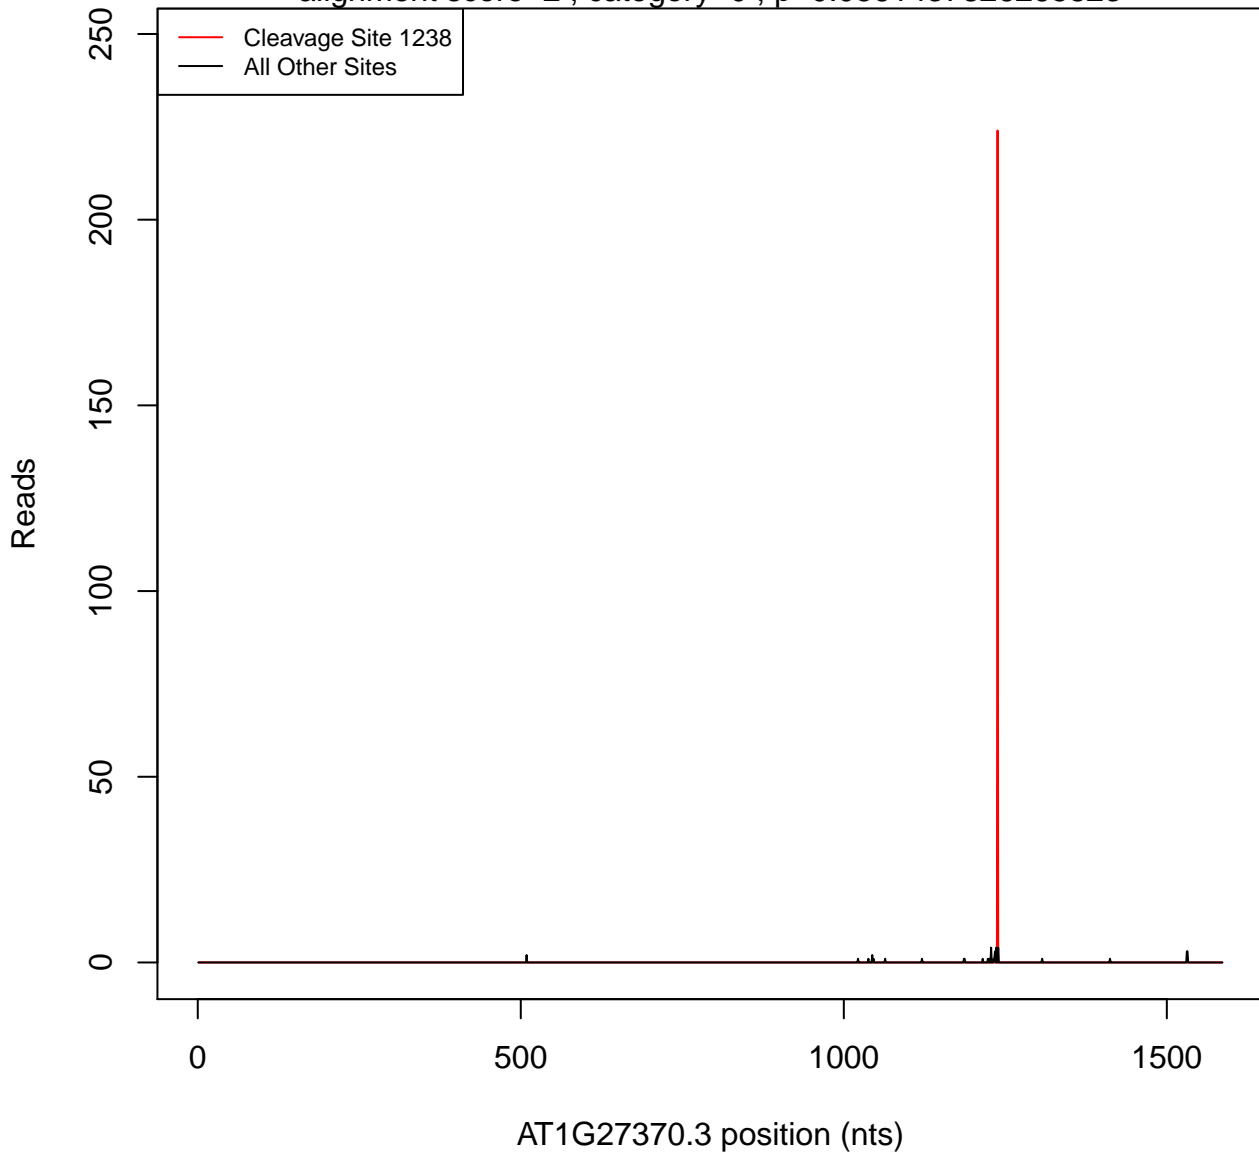

# ath-miR156i slicing AT1G27370.3 at nt 1238

alignment score=1 , category=0 , p=0.0626448986382654

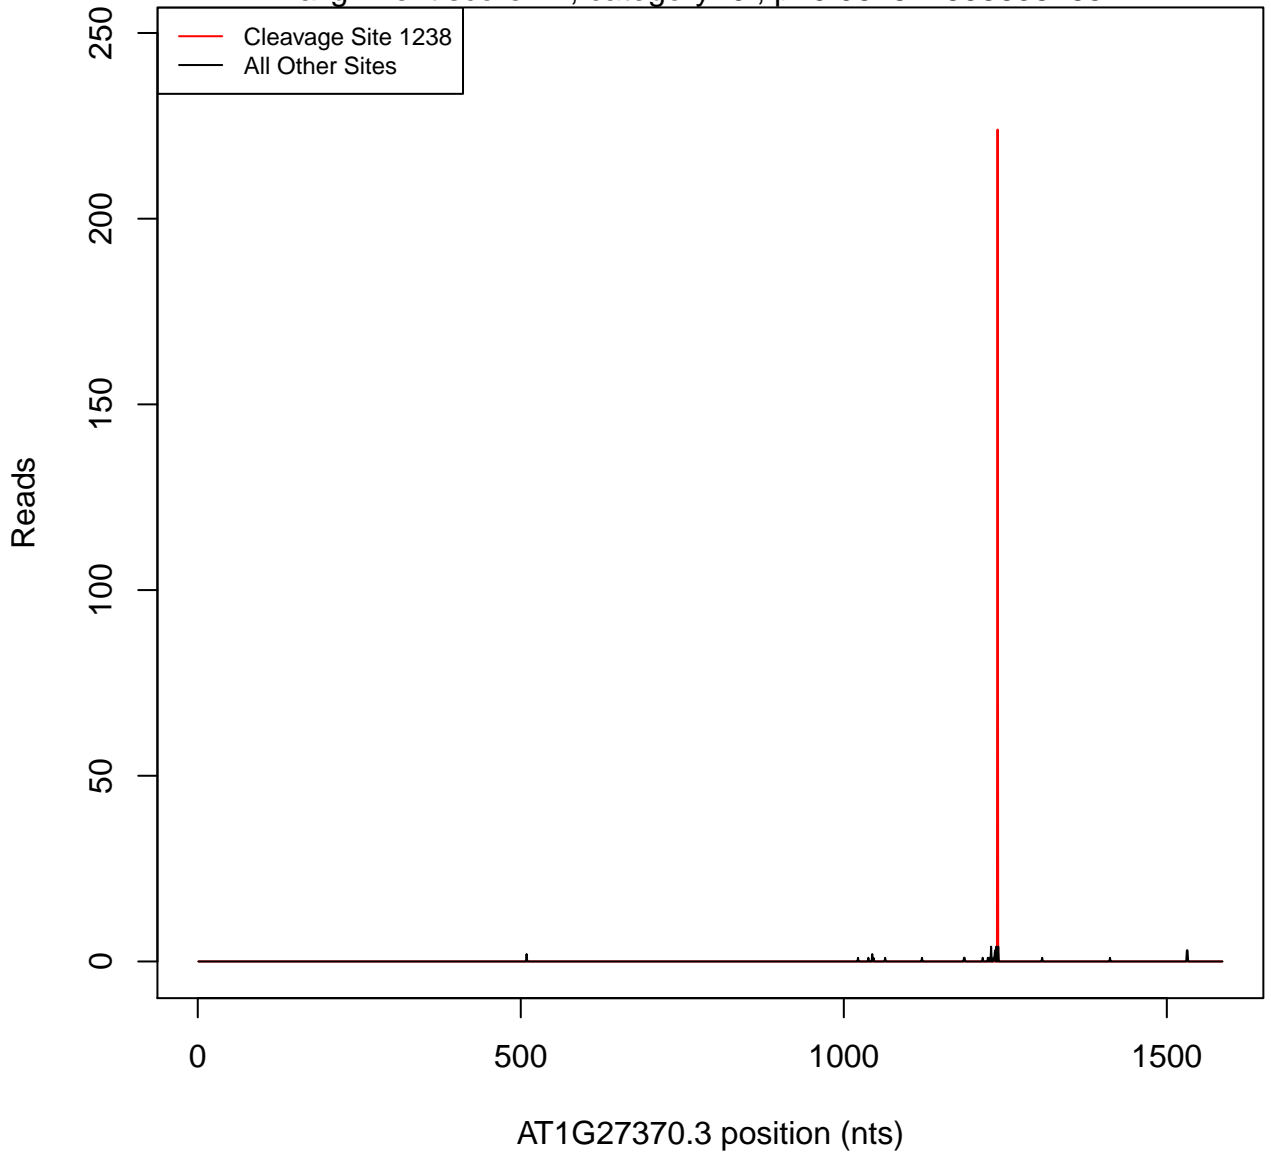

# ath-miR156j slicing AT1G27370.3 at nt 1238

alignment score=0 , category=0 , p=0.0680712184898578

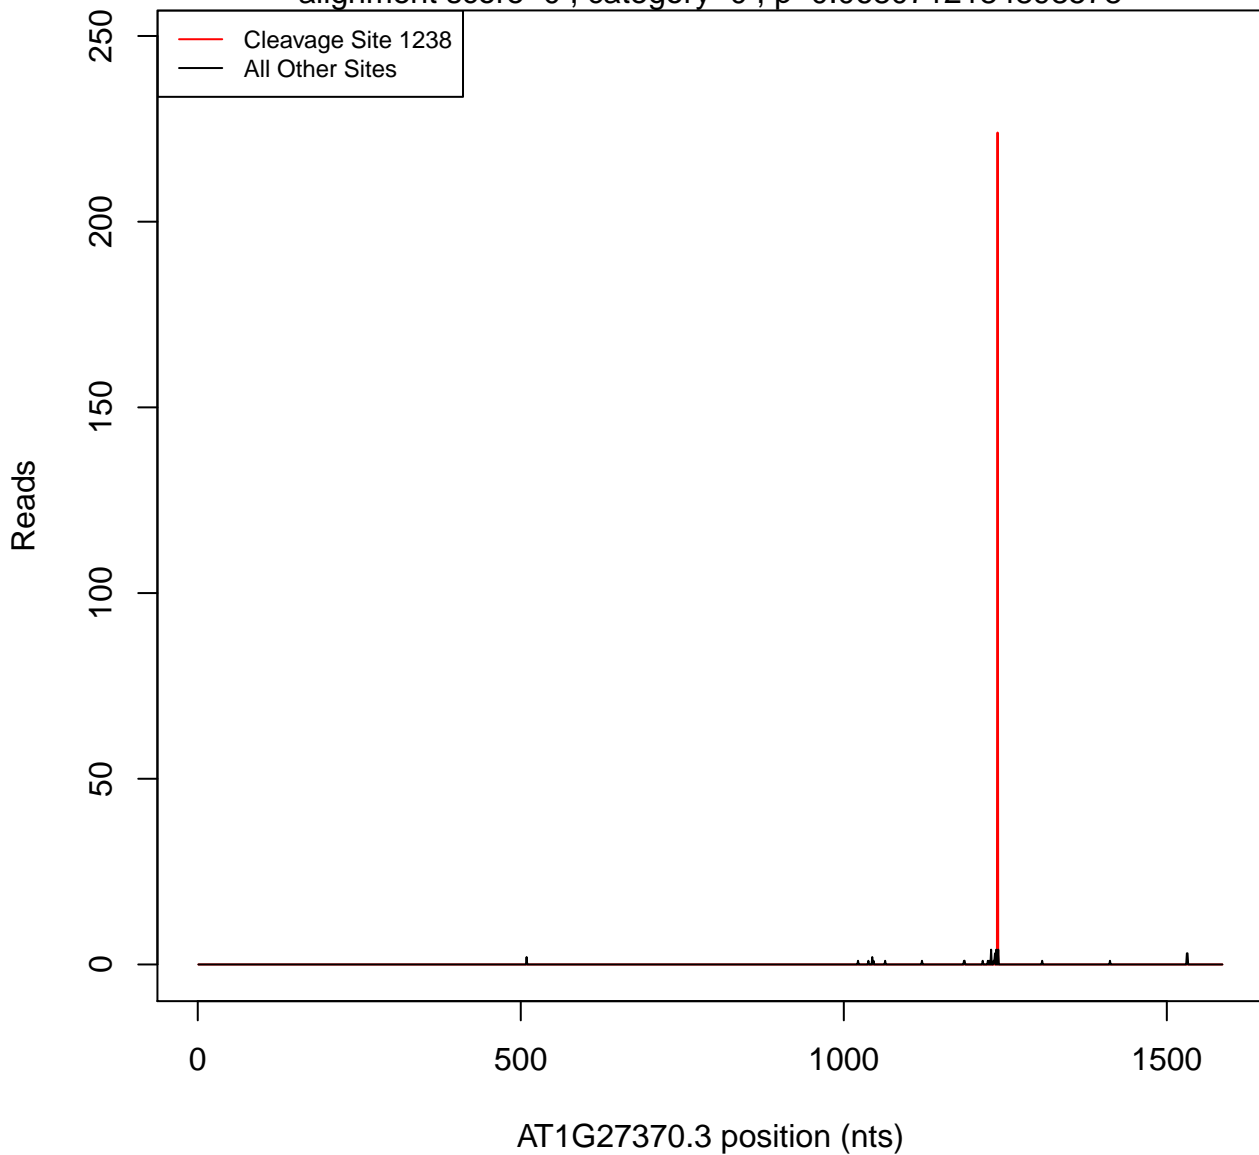

# ath-miR157d slicing AT1G27370.3 at nt 1238

alignment score=2 , category=0 , p=0.0561437826265823

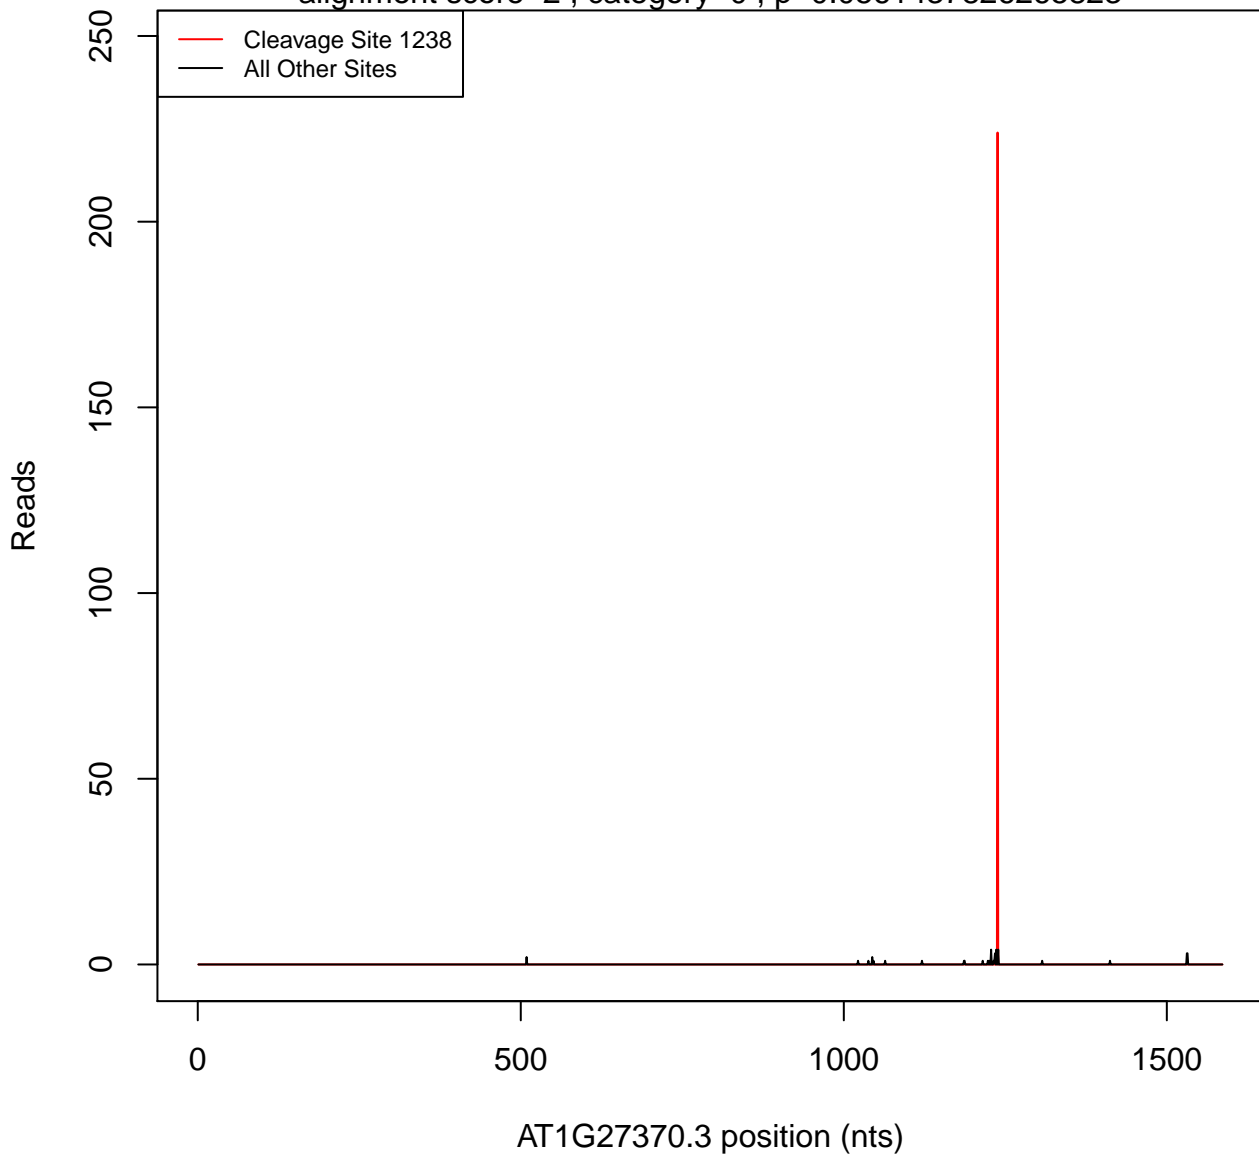

# ath-miR156a slicing AT1G27370.4 at nt 1325

alignment score=1 , category=0 , p=0.0592699262622588

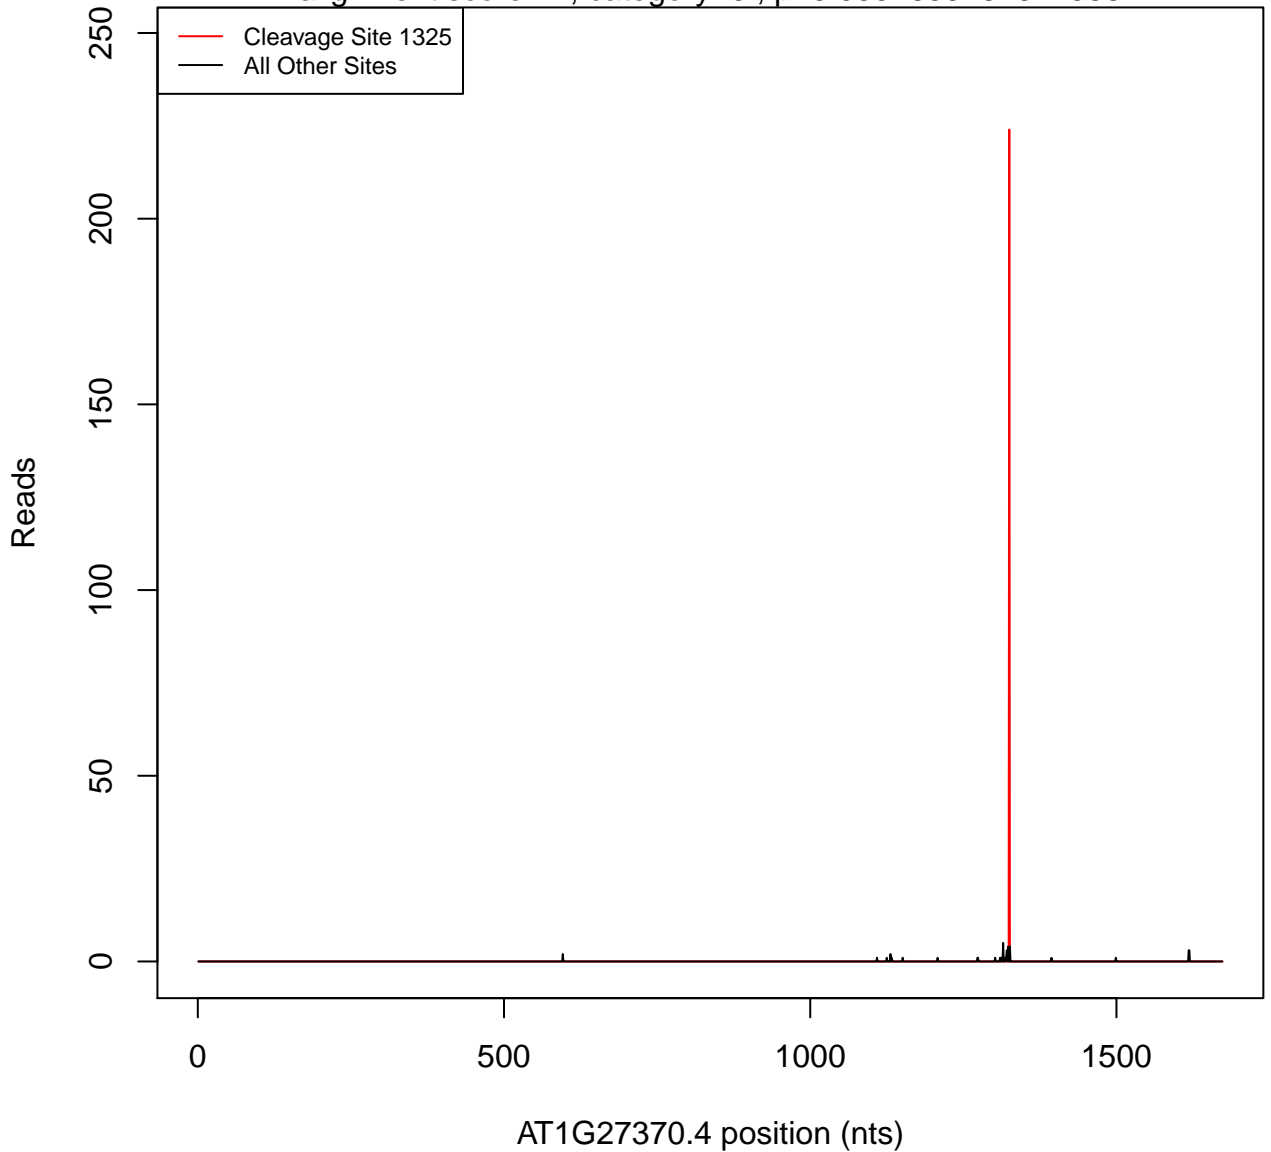

# ath-miR156b slicing AT1G27370.4 at nt 1325

alignment score=1 , category=0 , p=0.0592699262622588

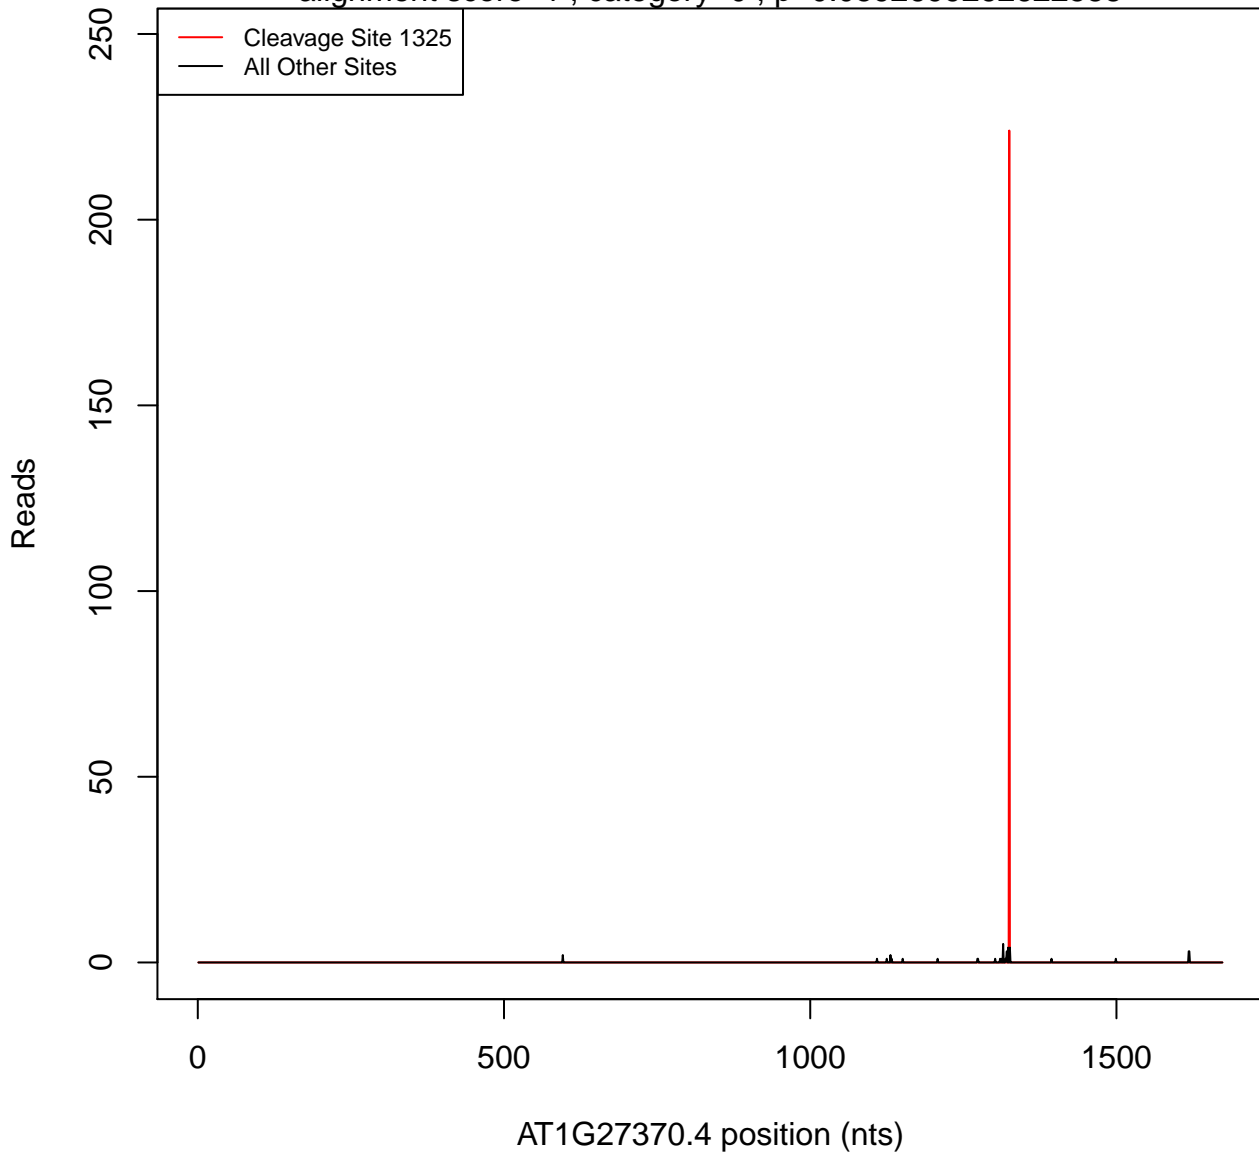



# ath-miR156c slicing AT1G27370.4 at nt 1325

alignment score=1 , category=0 , p=0.0592699262622588



# ath-miR156d slicing AT1G27370.4 at nt 1325

alignment score=1 , category=0 , p=0.0592699262622588



# ath-miR156e slicing AT1G27370.4 at nt 1325

alignment score=1 , category=0 , p=0.0592699262622588



# ath-miR156f slicing AT1G27370.4 at nt 1325

alignment score=1 , category=0 , p=0.0592699262622588



# ath-miR156g slicing AT1G27370.4 at nt 1325

alignment score=2 , category=0 , p=0.0503855131498749

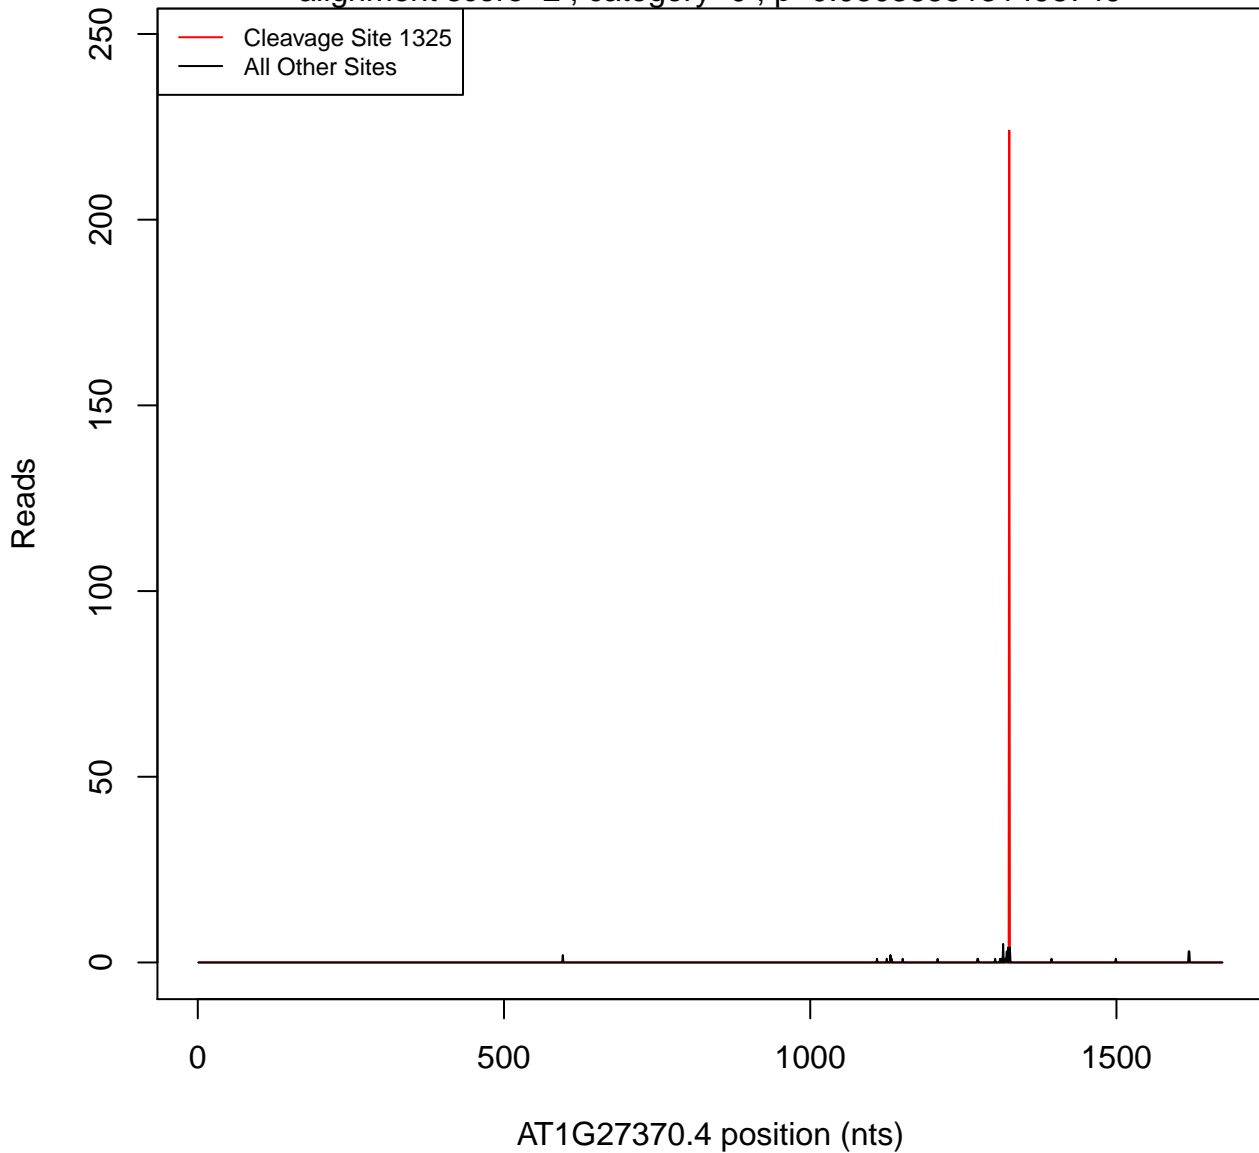

# ath-miR156h slicing AT1G27370.4 at nt 1325

alignment score=2 , category=0 , p=0.0561437826265823

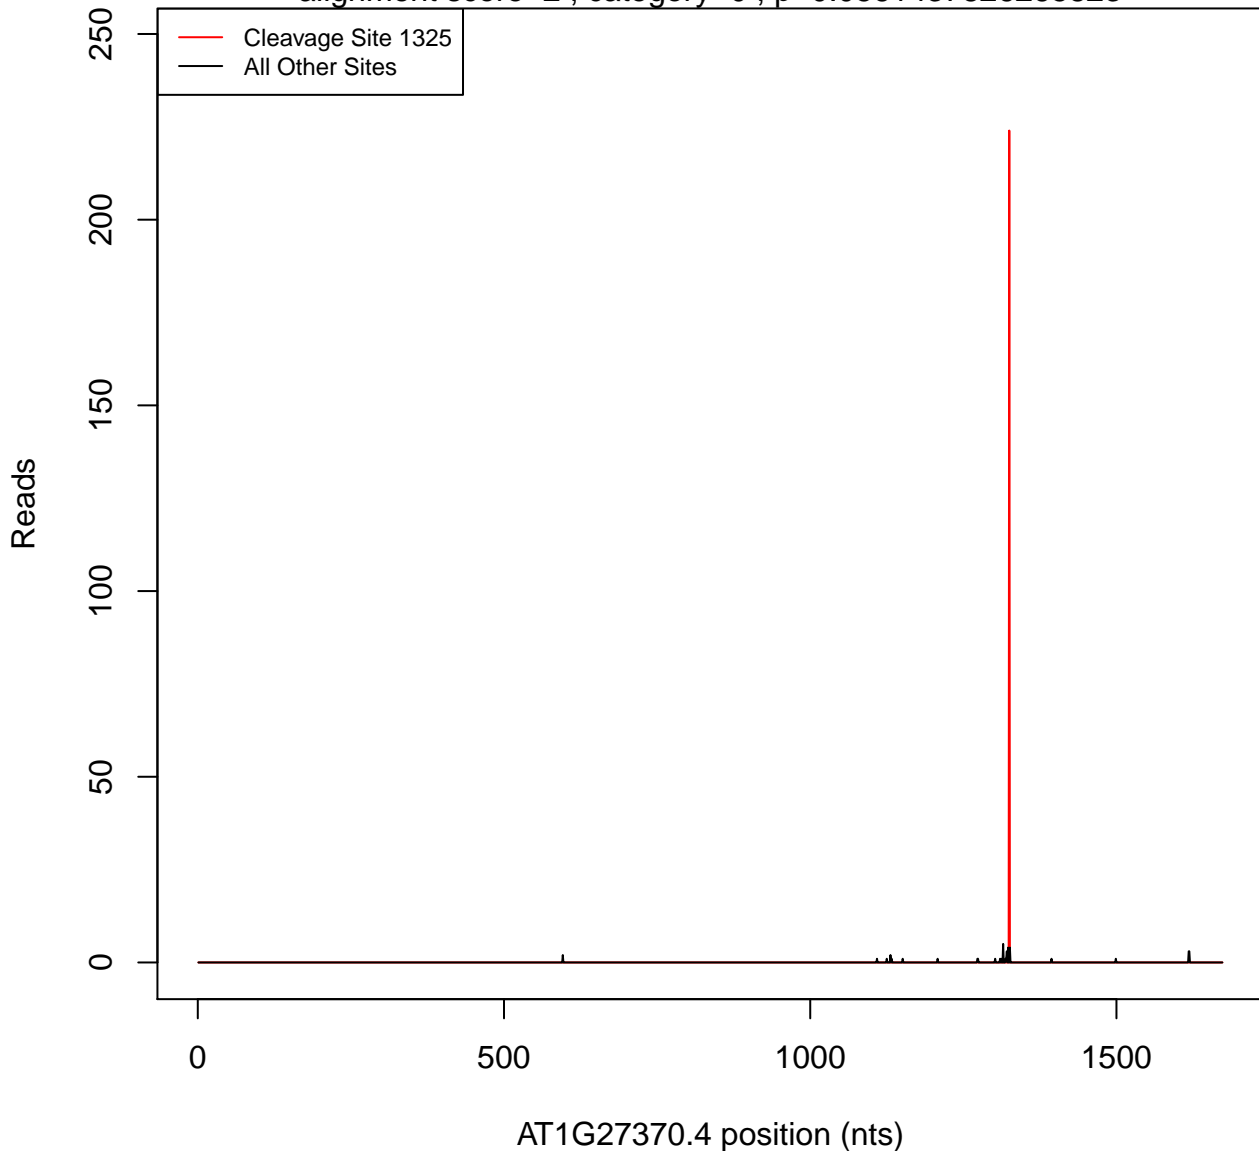

# ath-miR156i slicing AT1G27370.4 at nt 1325

alignment score=1 , category=0 , p=0.0626448986382654

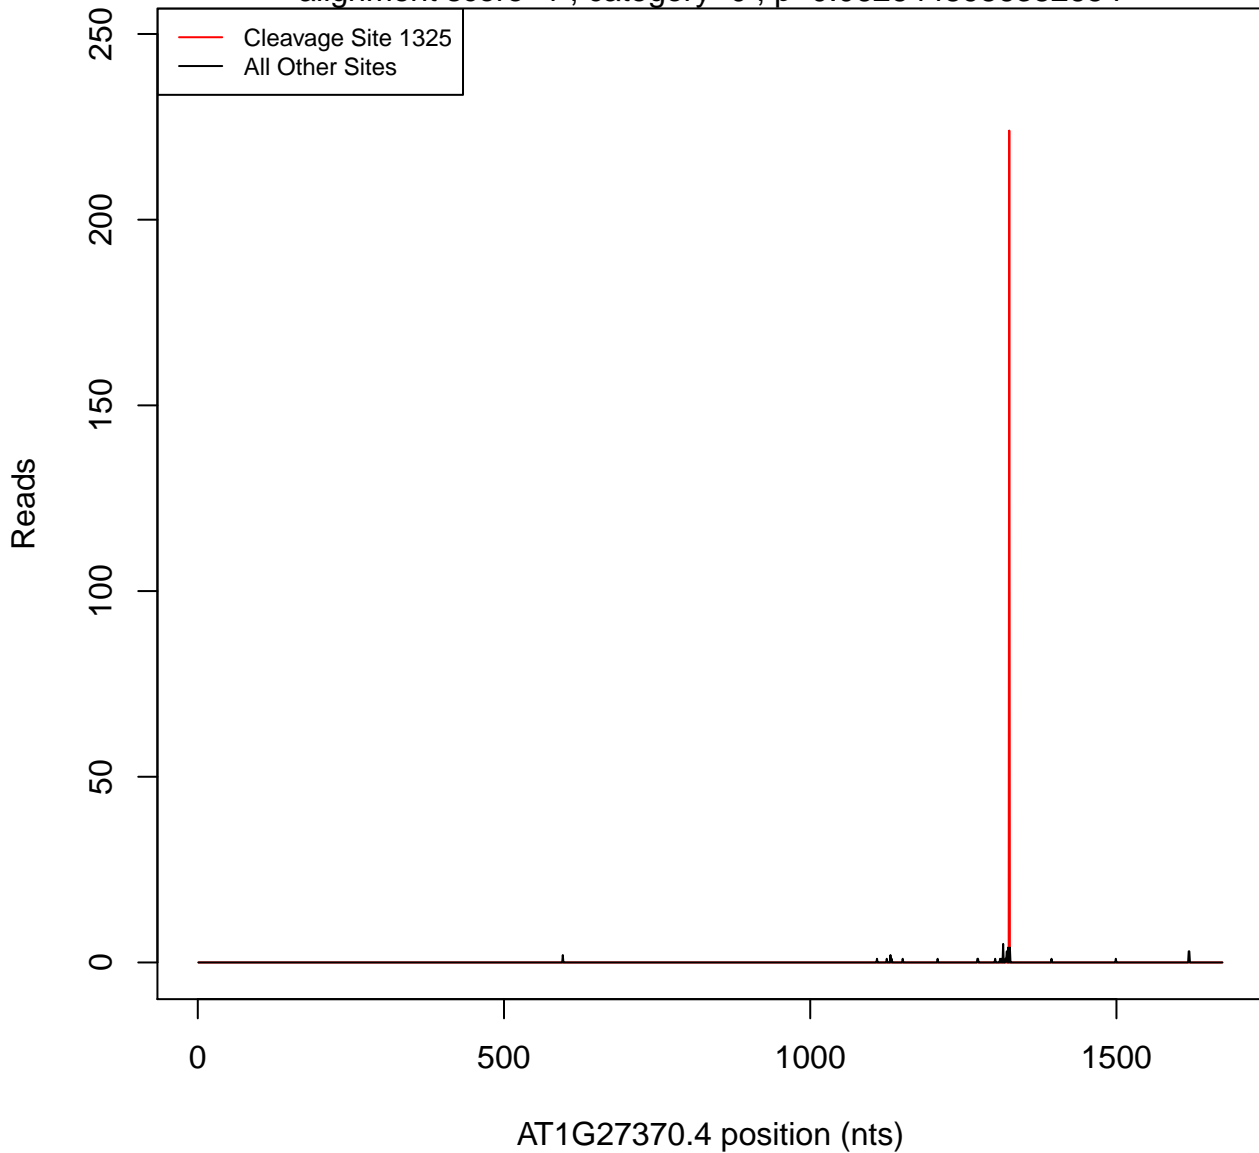

# ath-miR156j slicing AT1G27370.4 at nt 1325

alignment score=0 , category=0 , p=0.0680712184898578

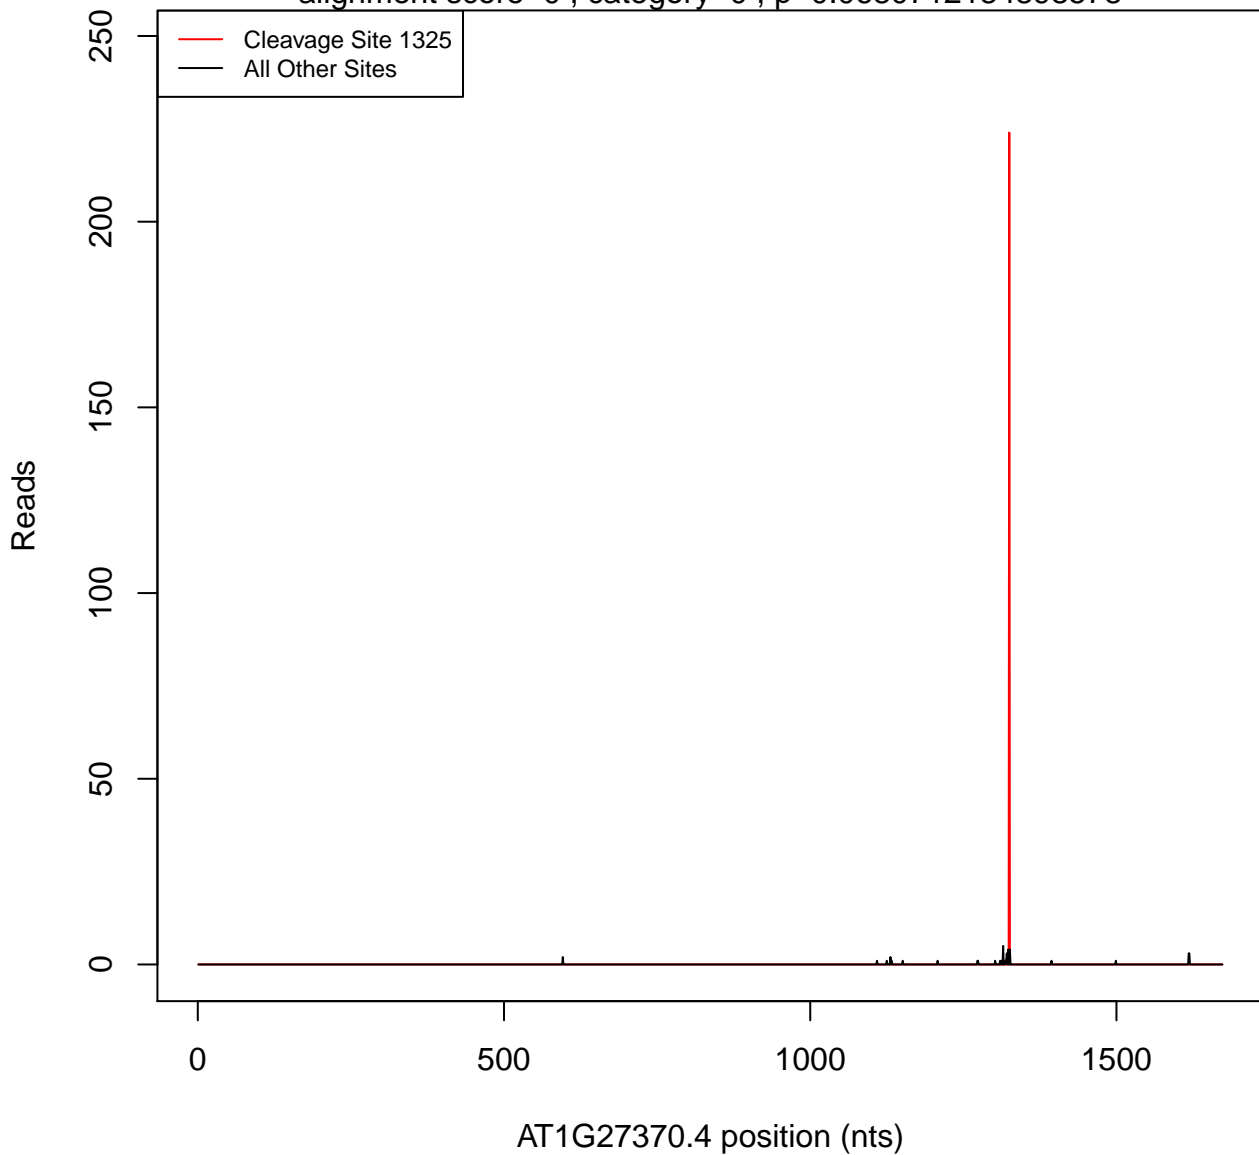



# ath-miR157d slicing AT1G27370.4 at nt 1325

alignment score=2 , category=0 , p=0.0561437826265823

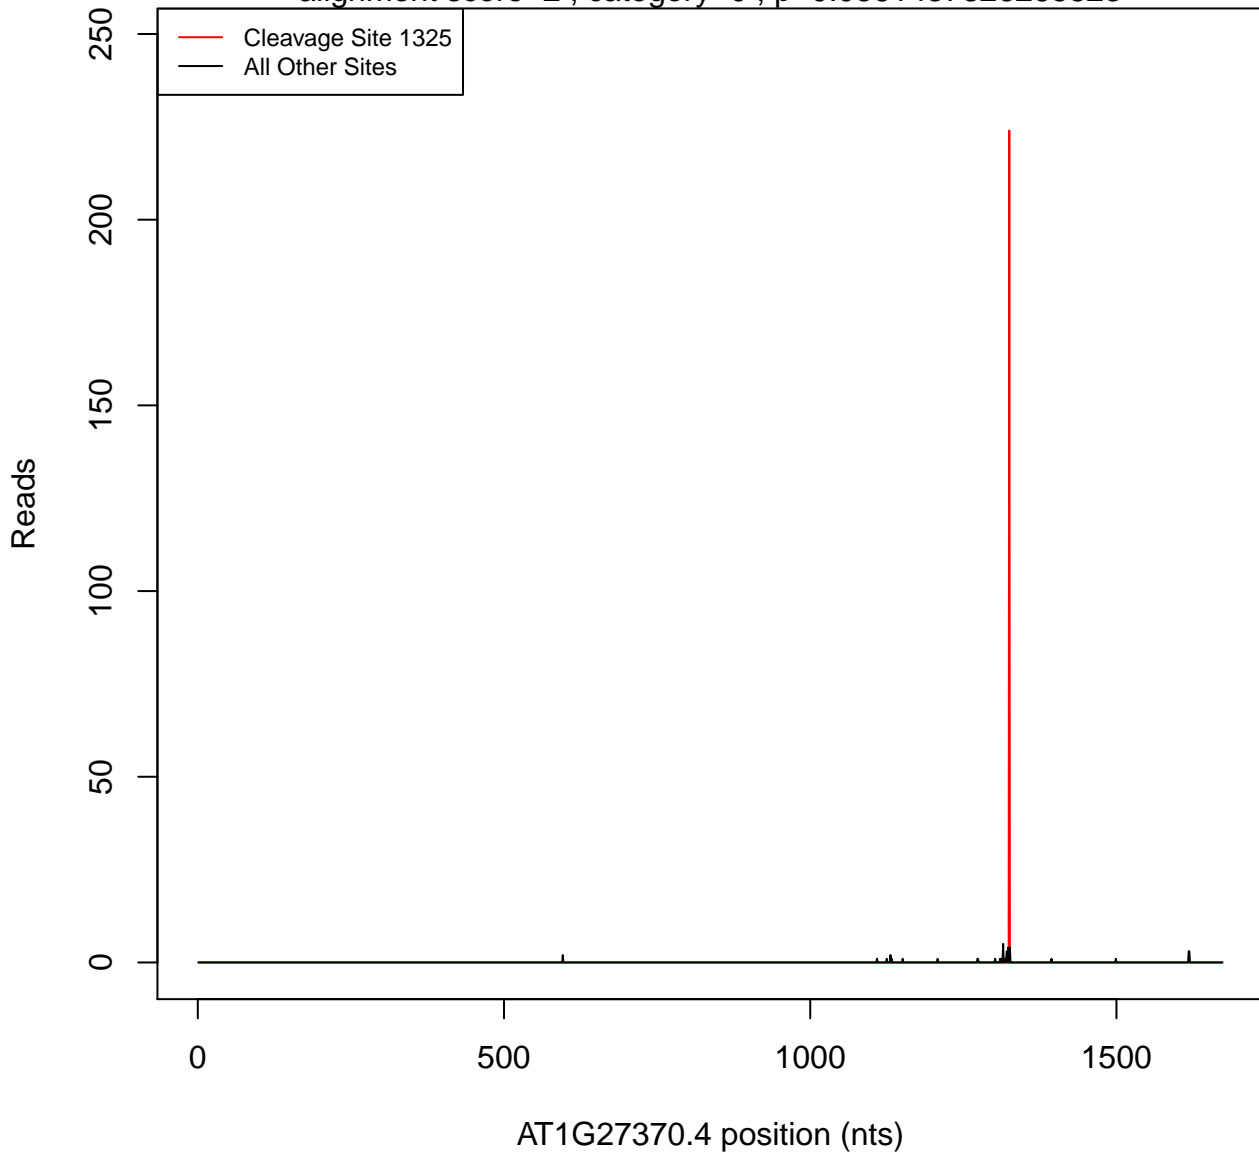

# ath-miR167c slicing AT1G30330.1 at nt 3326

alignment score=3.5 , category=4 , p=0.0938043964041548

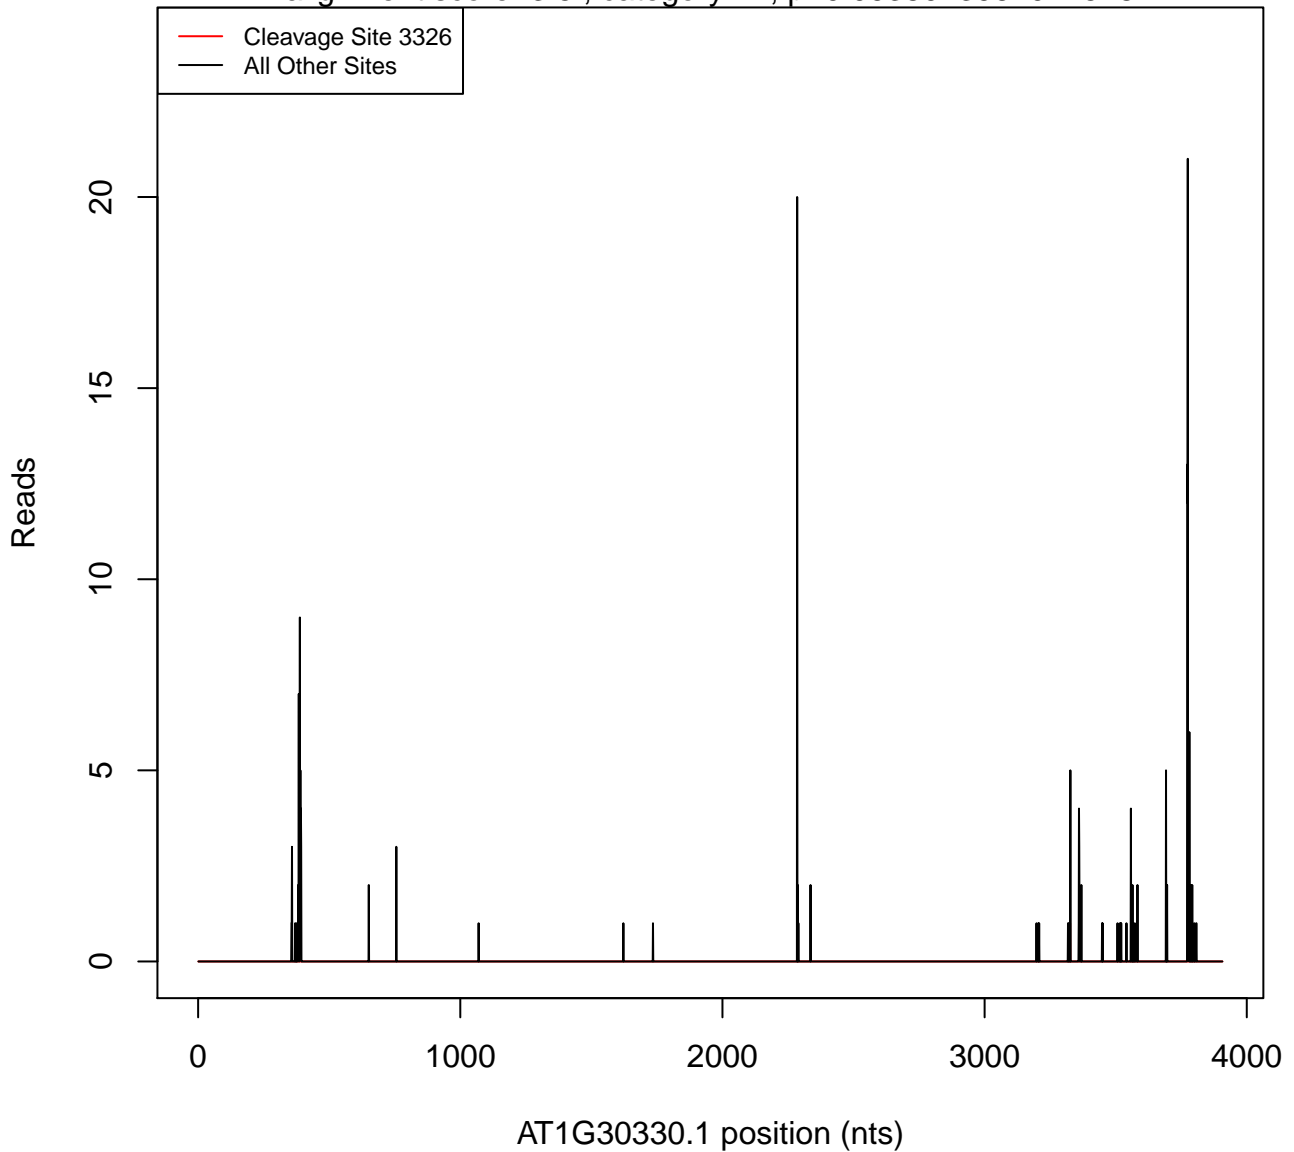

# ath-miR167c slicing AT1G30330.2 at nt 3246

alignment score=3.5 , category=4 , p=0.0938043964041548

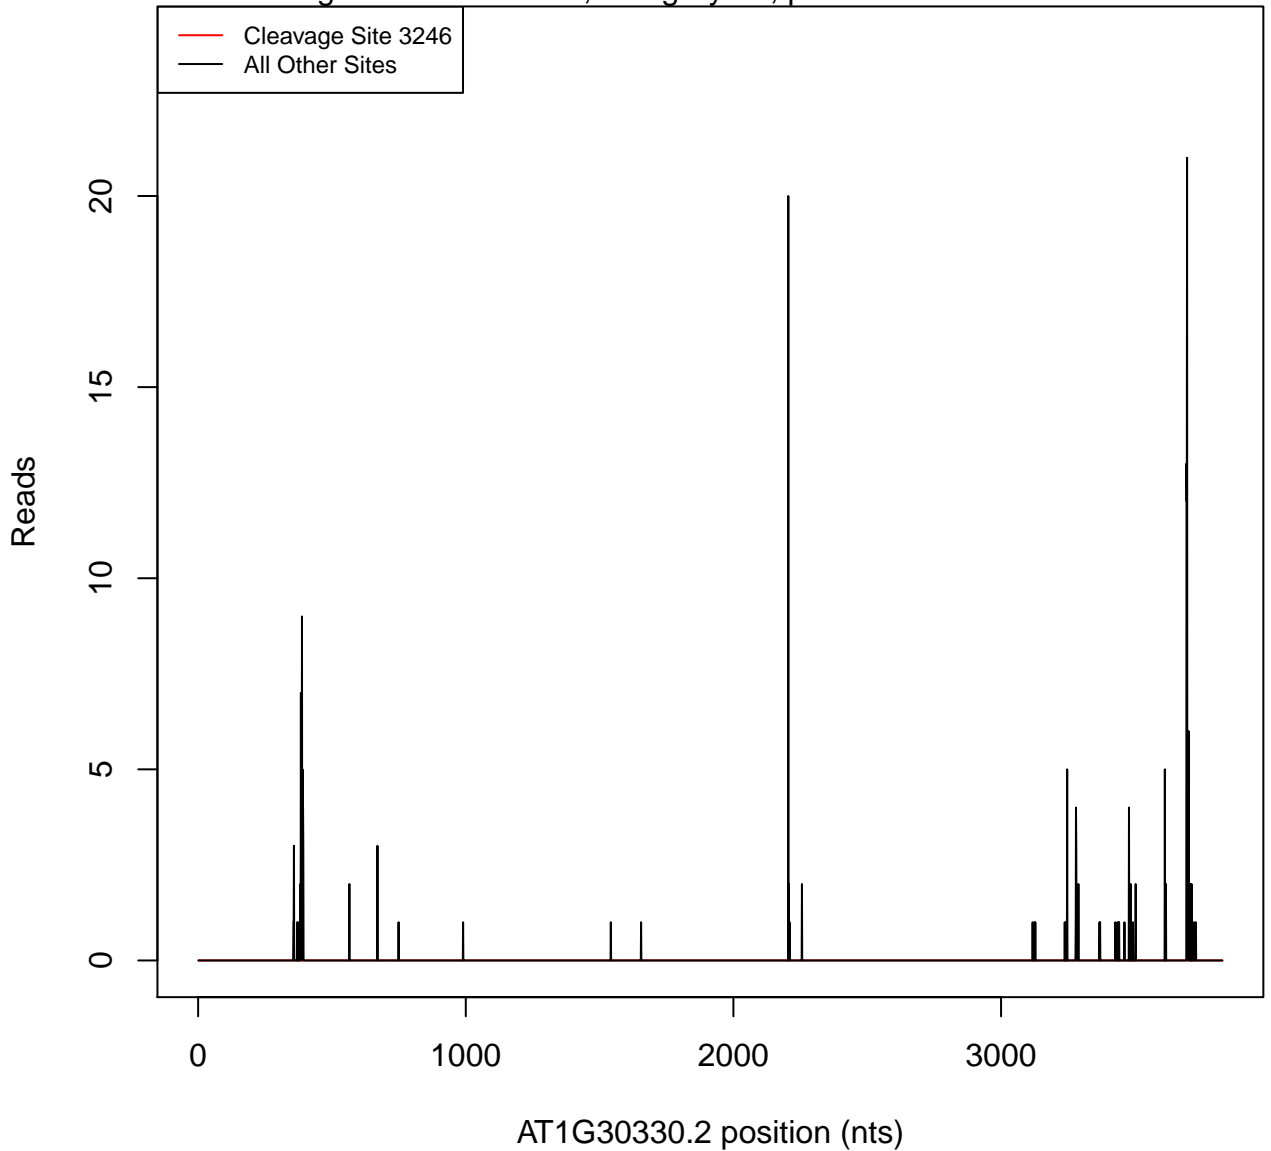

# ath-miR165a slicing AT1G30490.1 at nt 806

alignment score=2.5 , category=3 , p=0.0329128303306404

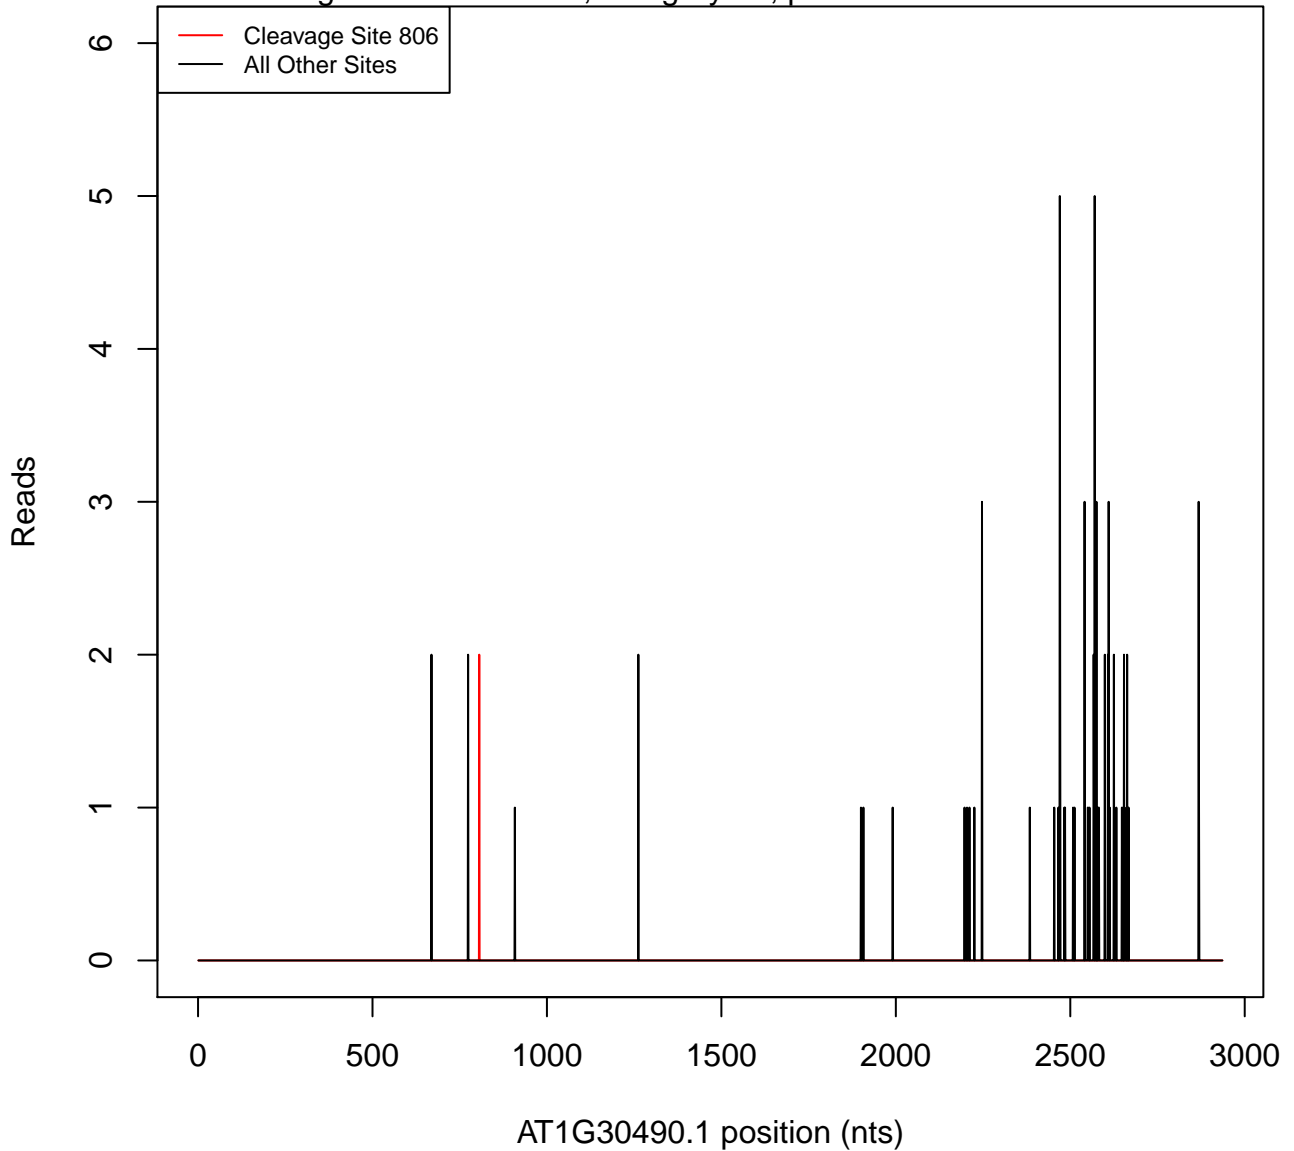

# ath-miR165b slicing AT1G30490.1 at nt 806

alignment score=2.5 , category=3 , p=0.0329128303306404

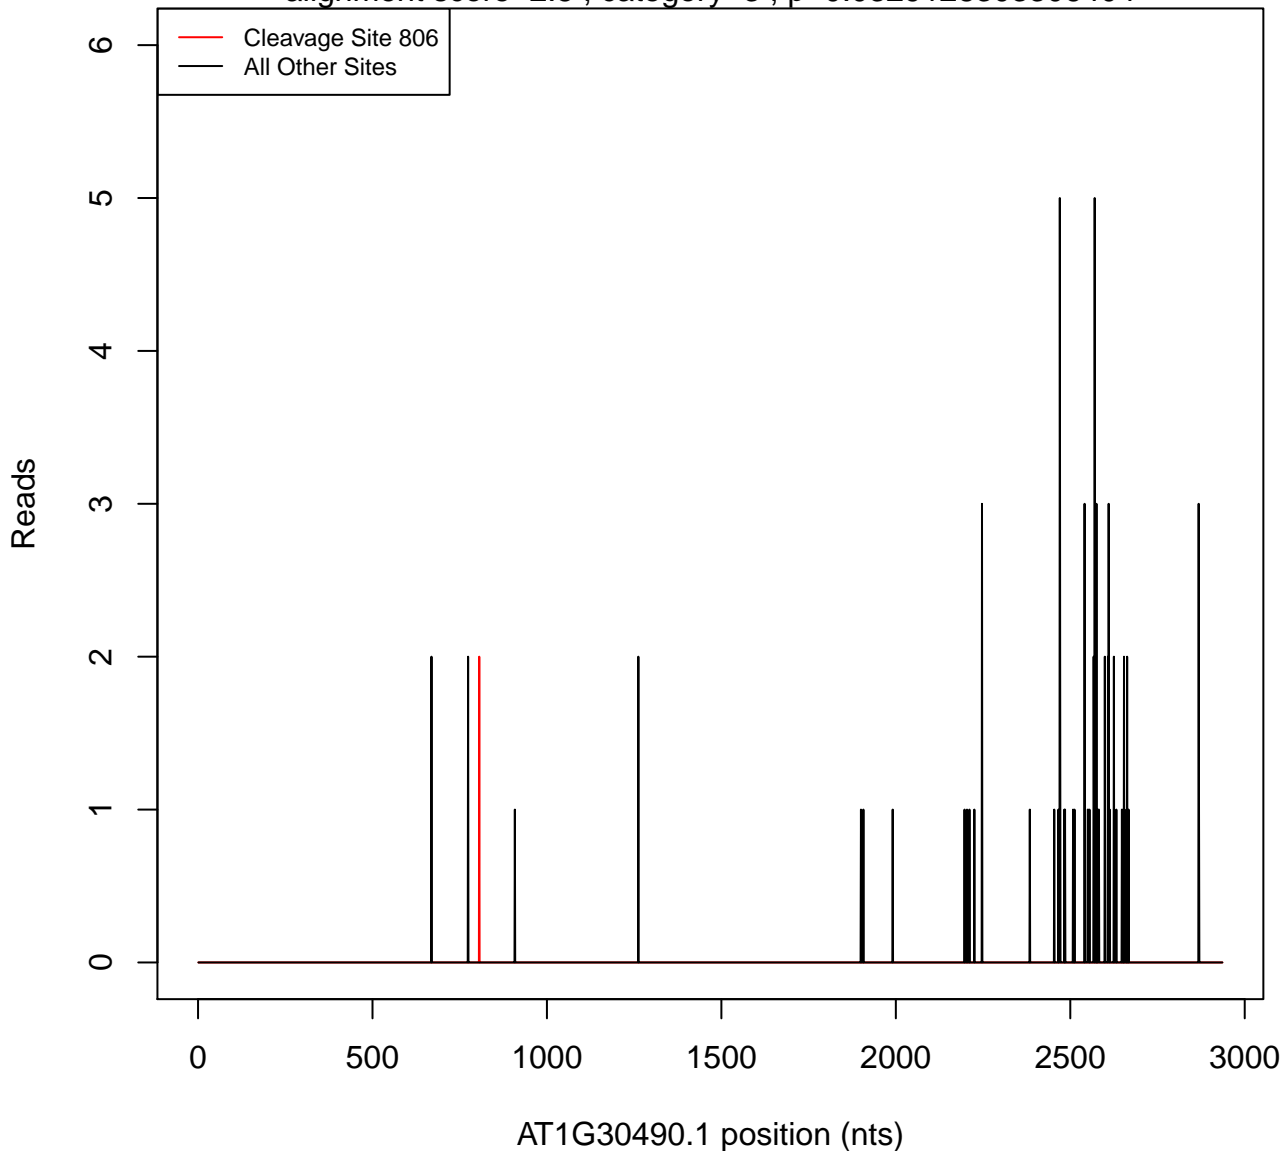

# ath-miR166a slicing AT1G30490.1 at nt 806

alignment score=3 , category=3 , p=0.0296708923966995

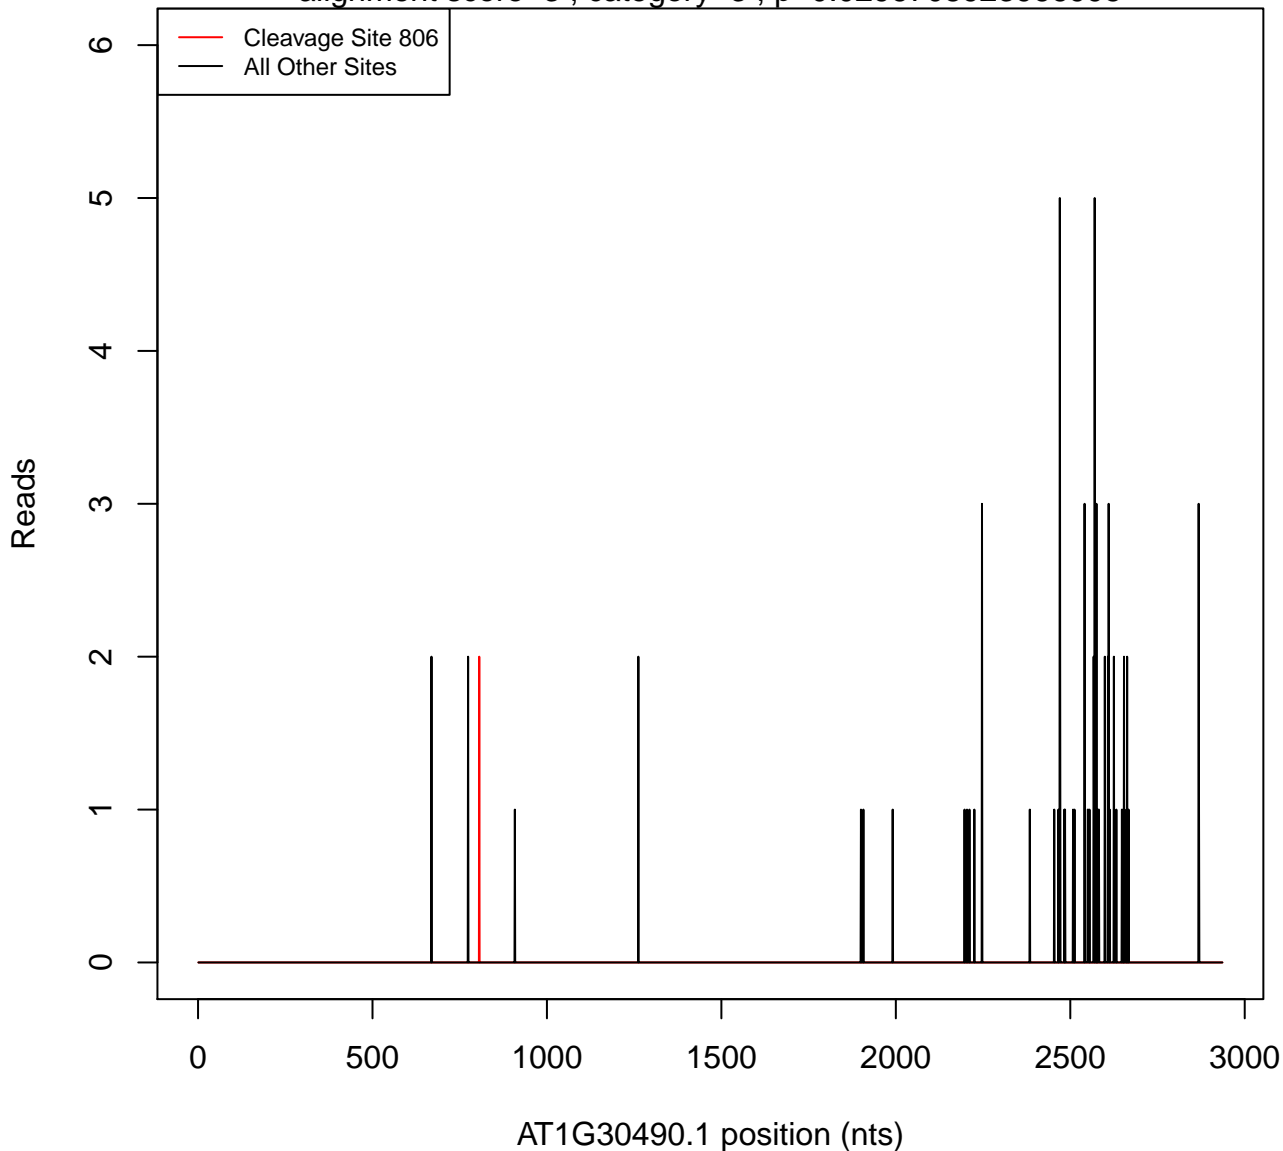

# ath-miR166b slicing AT1G30490.1 at nt 806

alignment score=3 , category=3 , p=0.0296708923966995

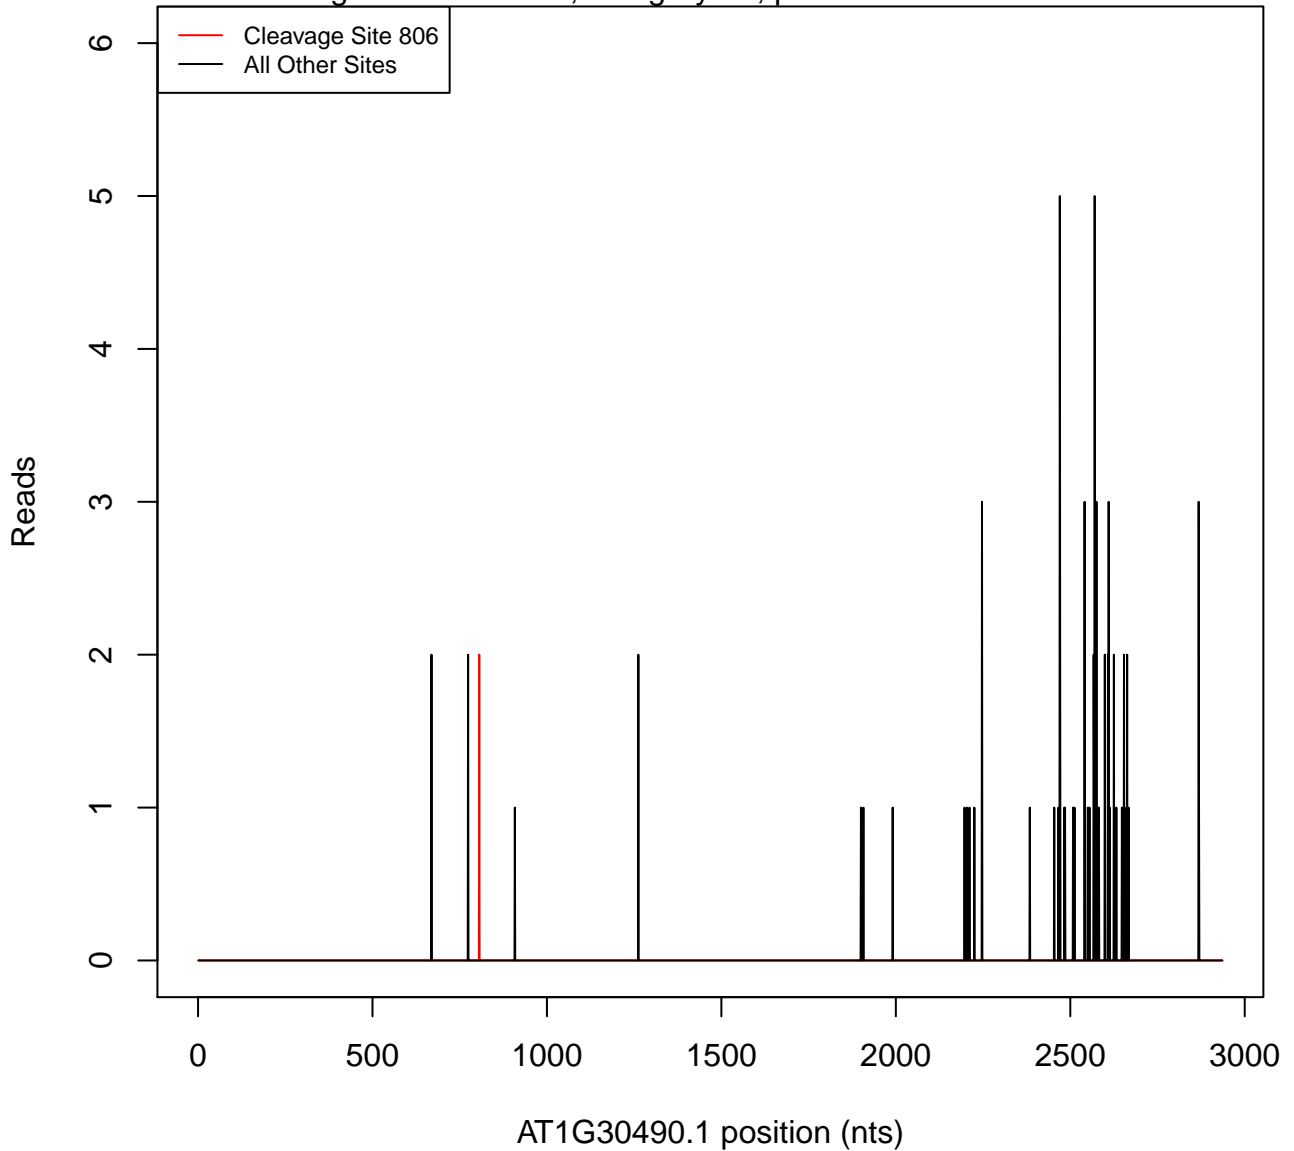

# ath-miR166c slicing AT1G30490.1 at nt 806

alignment score=3 , category=3 , p=0.0296708923966995





# ath-miR166d slicing AT1G30490.1 at nt 806

alignment score=3 , category=3 , p=0.0296708923966995



# ath-miR166e slicing AT1G30490.1 at nt 806

alignment score=3 , category=3 , p=0.0296708923966995



# ath-miR166f slicing AT1G30490.1 at nt 806

alignment score=3 , category=3 , p=0.0296708923966995



# ath-miR166g slicing AT1G30490.1 at nt 806

alignment score=3 , category=3 , p=0.0296708923966995

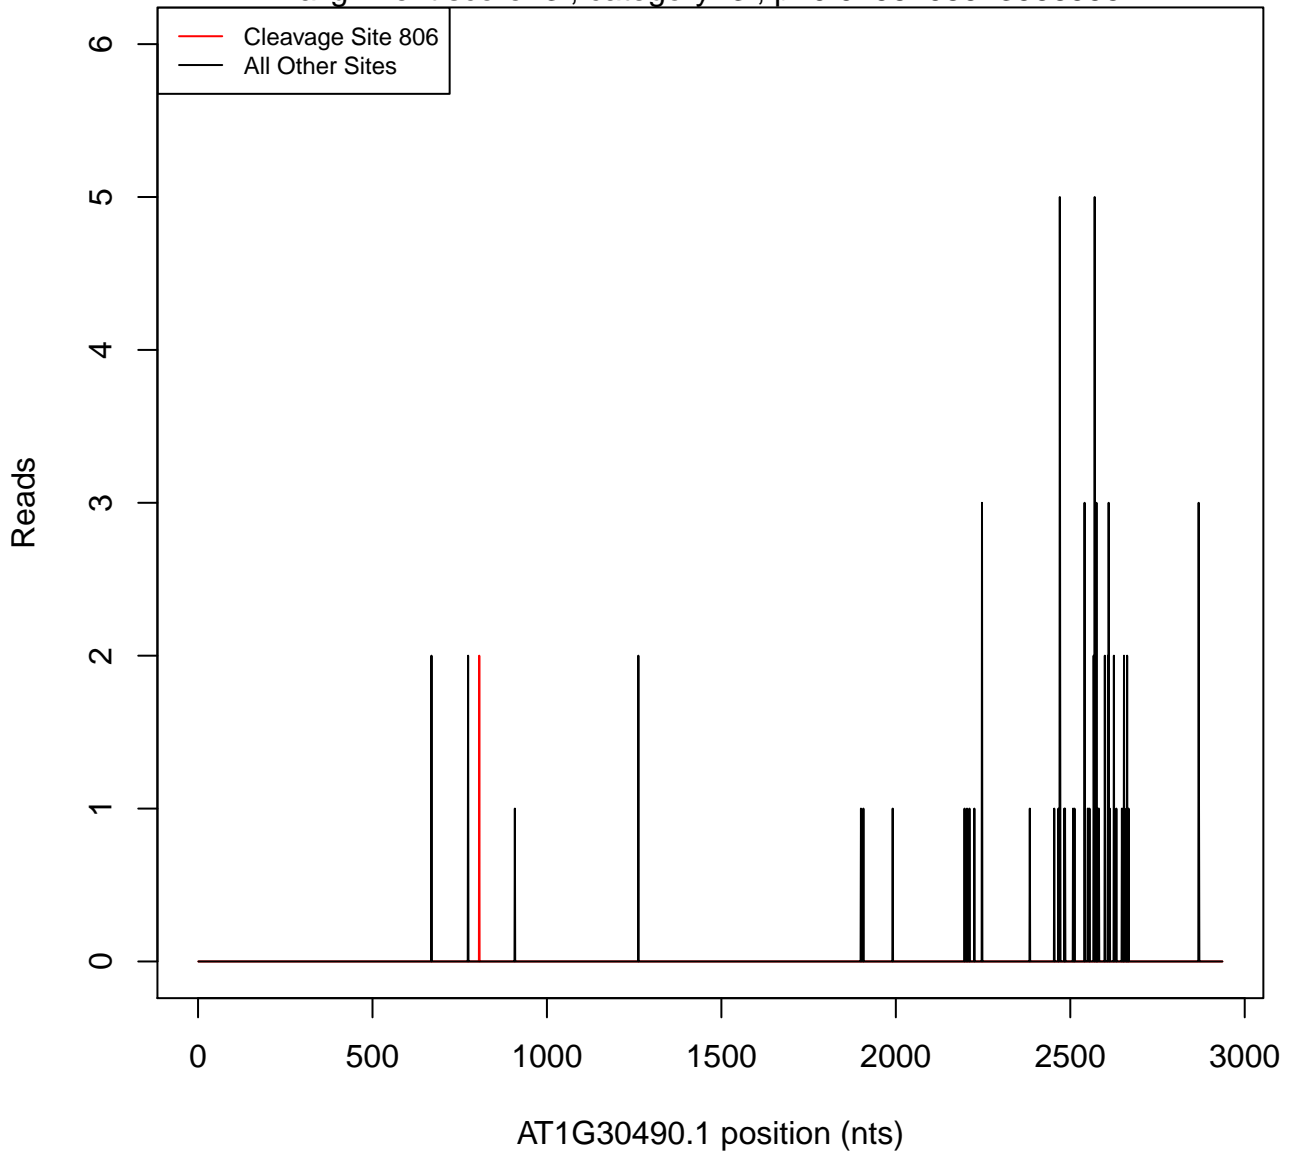

# gma-miR166a-3p\_1ss21CT slicing AT1G30490.1 at nt 806

alignment score=3 , category=3 , p=0.0296708923966995

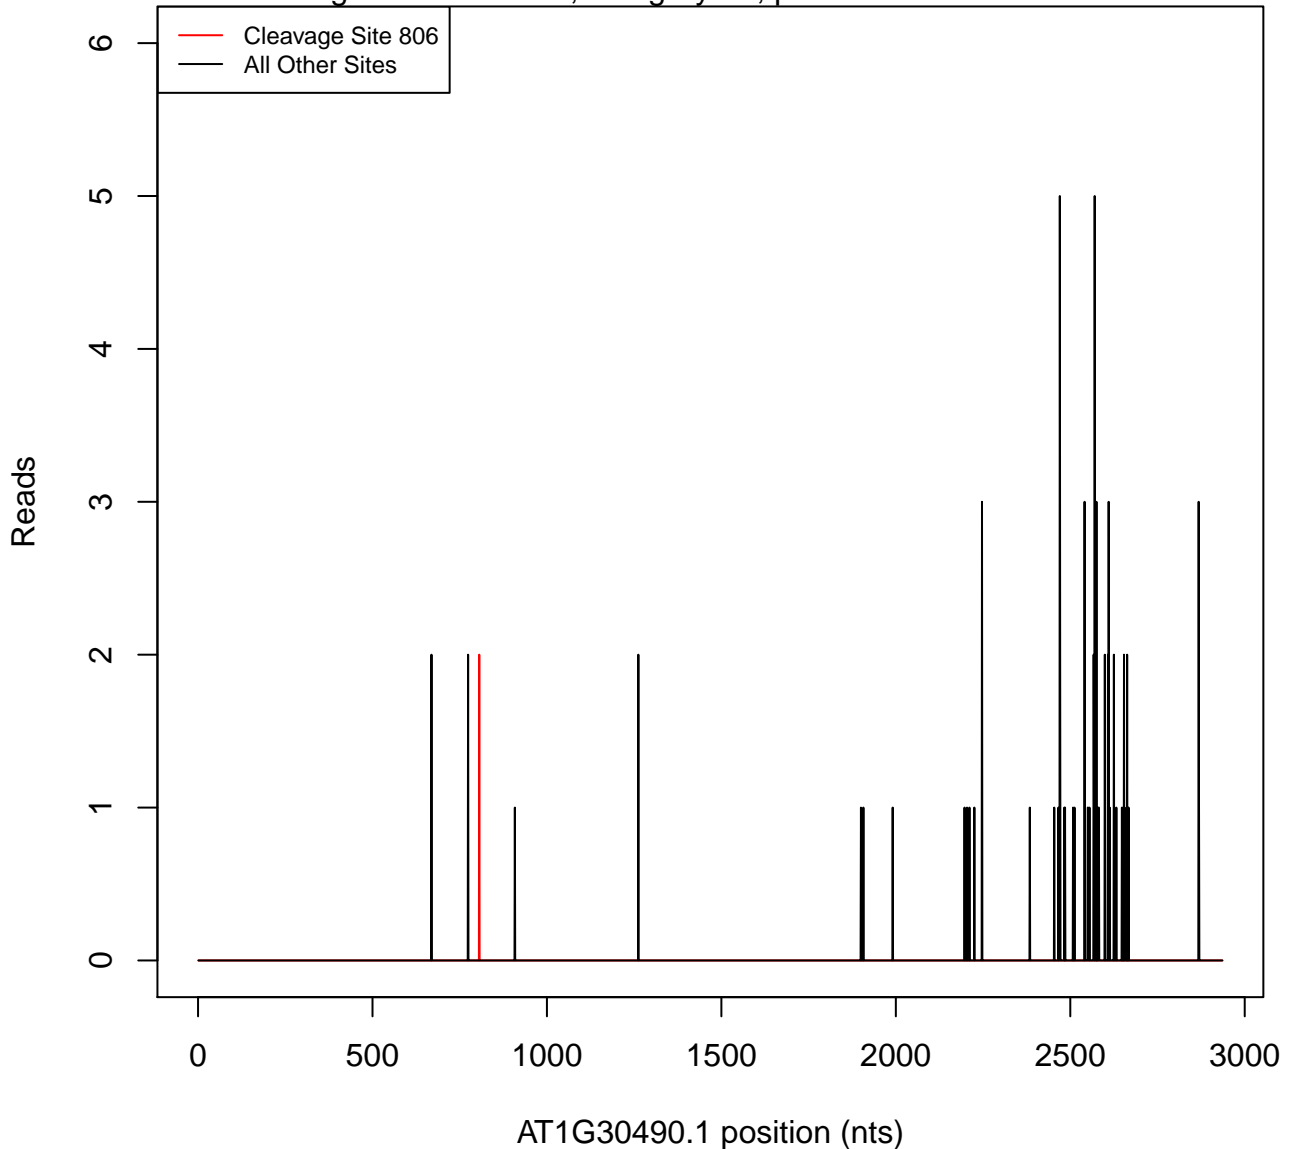

# ath-miR403 slicing AT1G31280.1 at nt 3233

alignment score=1 , category=0 , p=0.00358760974080163

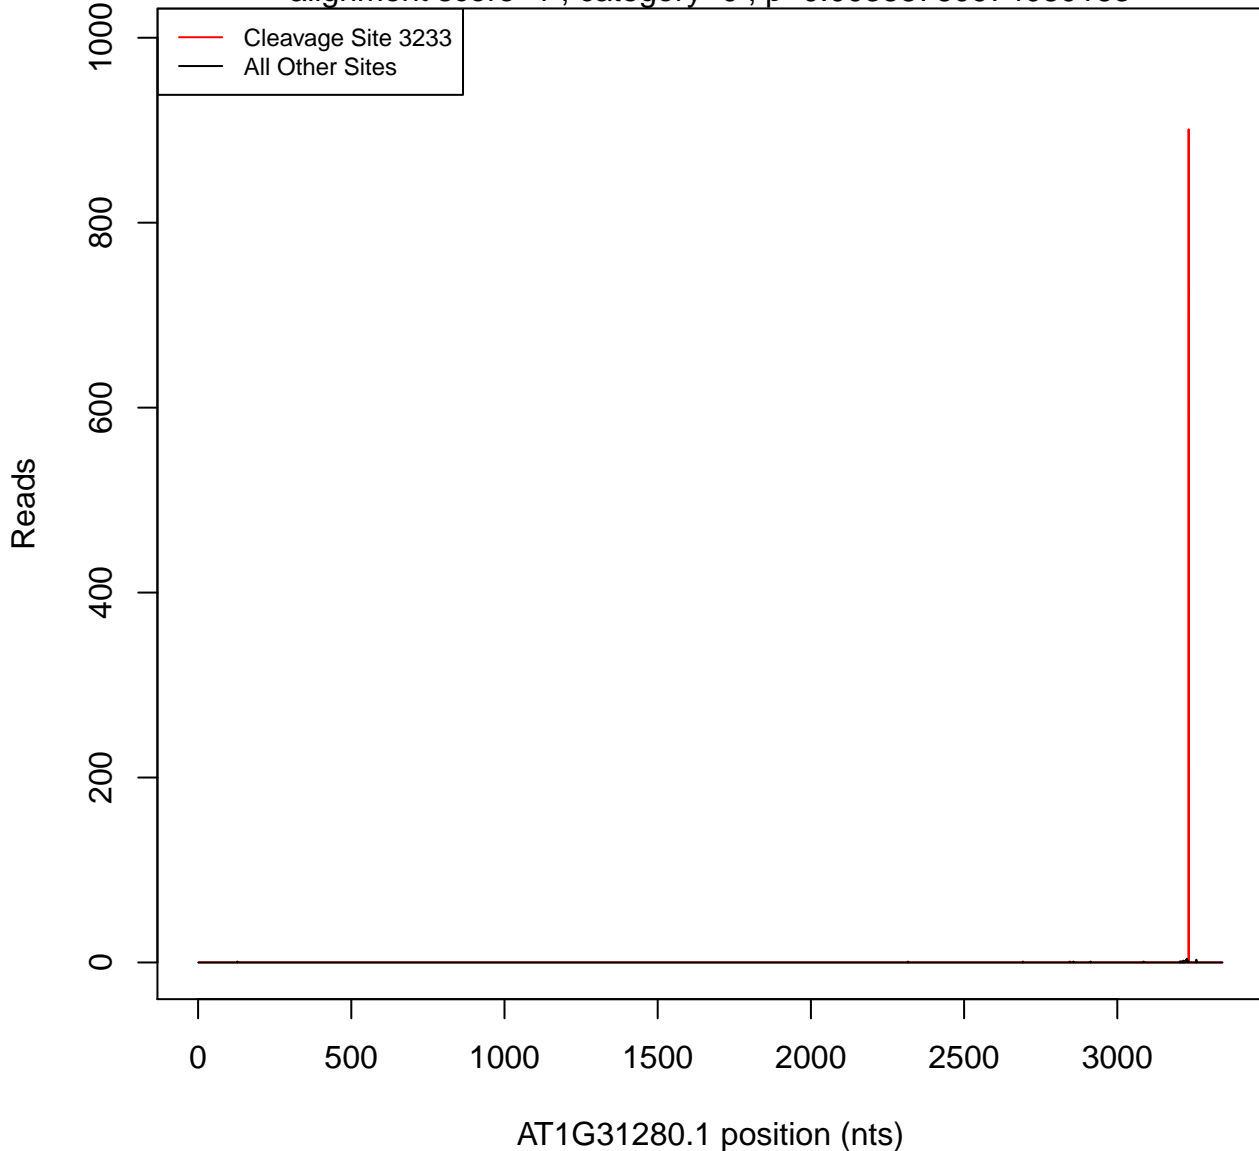

# ath-miR156a slicing AT1G53160.1 at nt 602

alignment score=2 , category=4 , p=0.0654767918236761

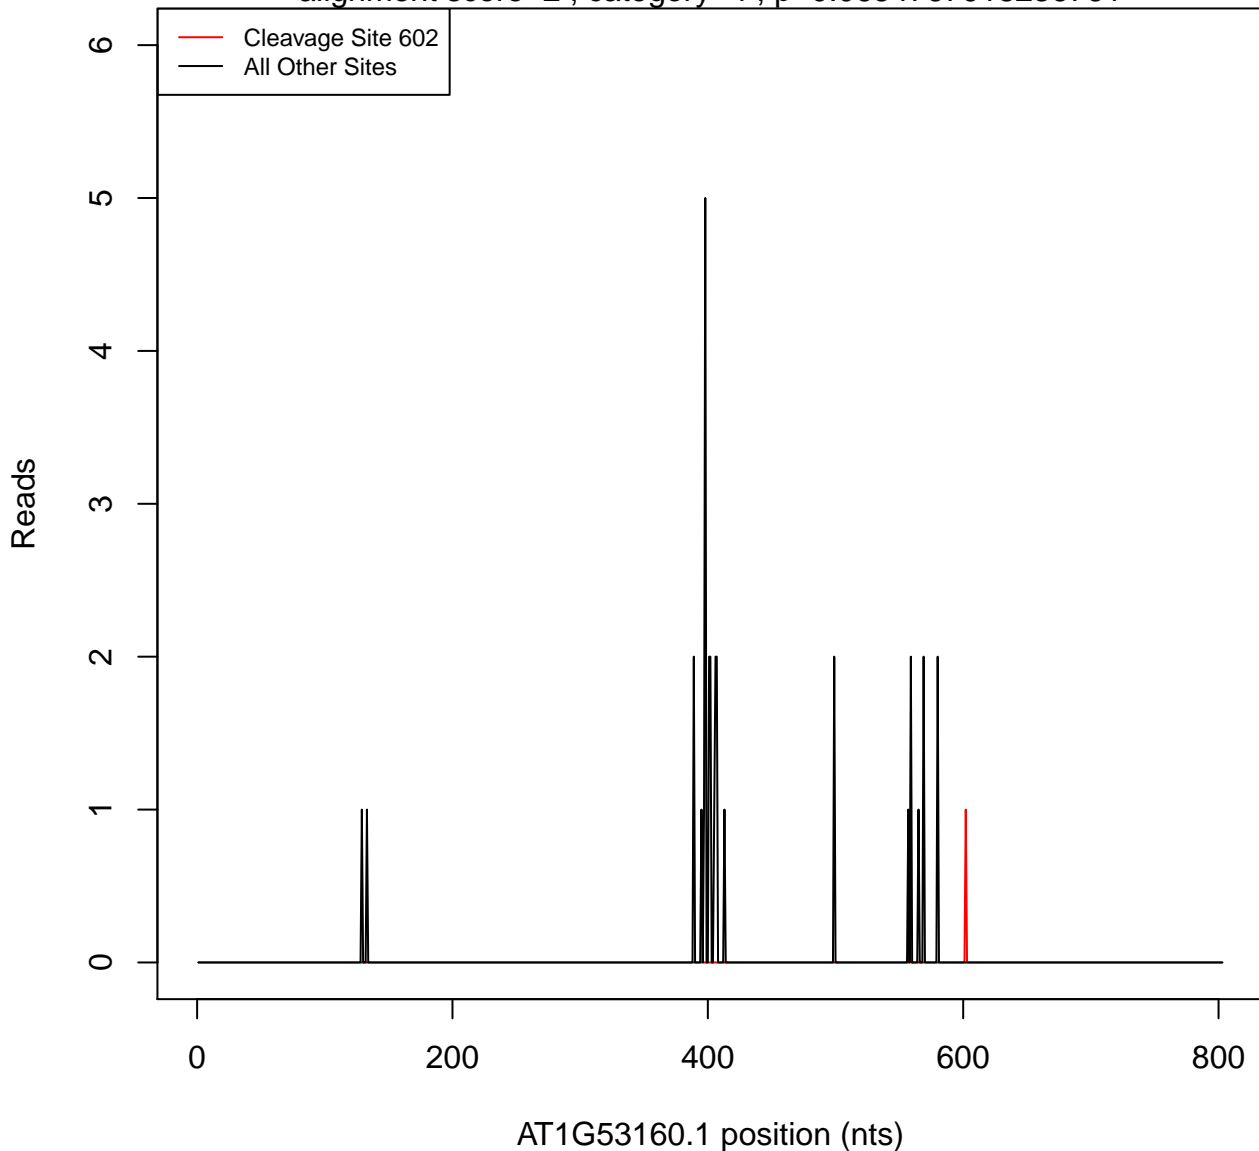

# ath-miR156b slicing AT1G53160.1 at nt 602

alignment score=2 , category=4 , p=0.0654767918236761





# ath-miR156c slicing AT1G53160.1 at nt 602

alignment score=2 , category=4 , p=0.0654767918236761



# ath-miR156d slicing AT1G53160.1 at nt 602

alignment score=2 , category=4 , p=0.0654767918236761

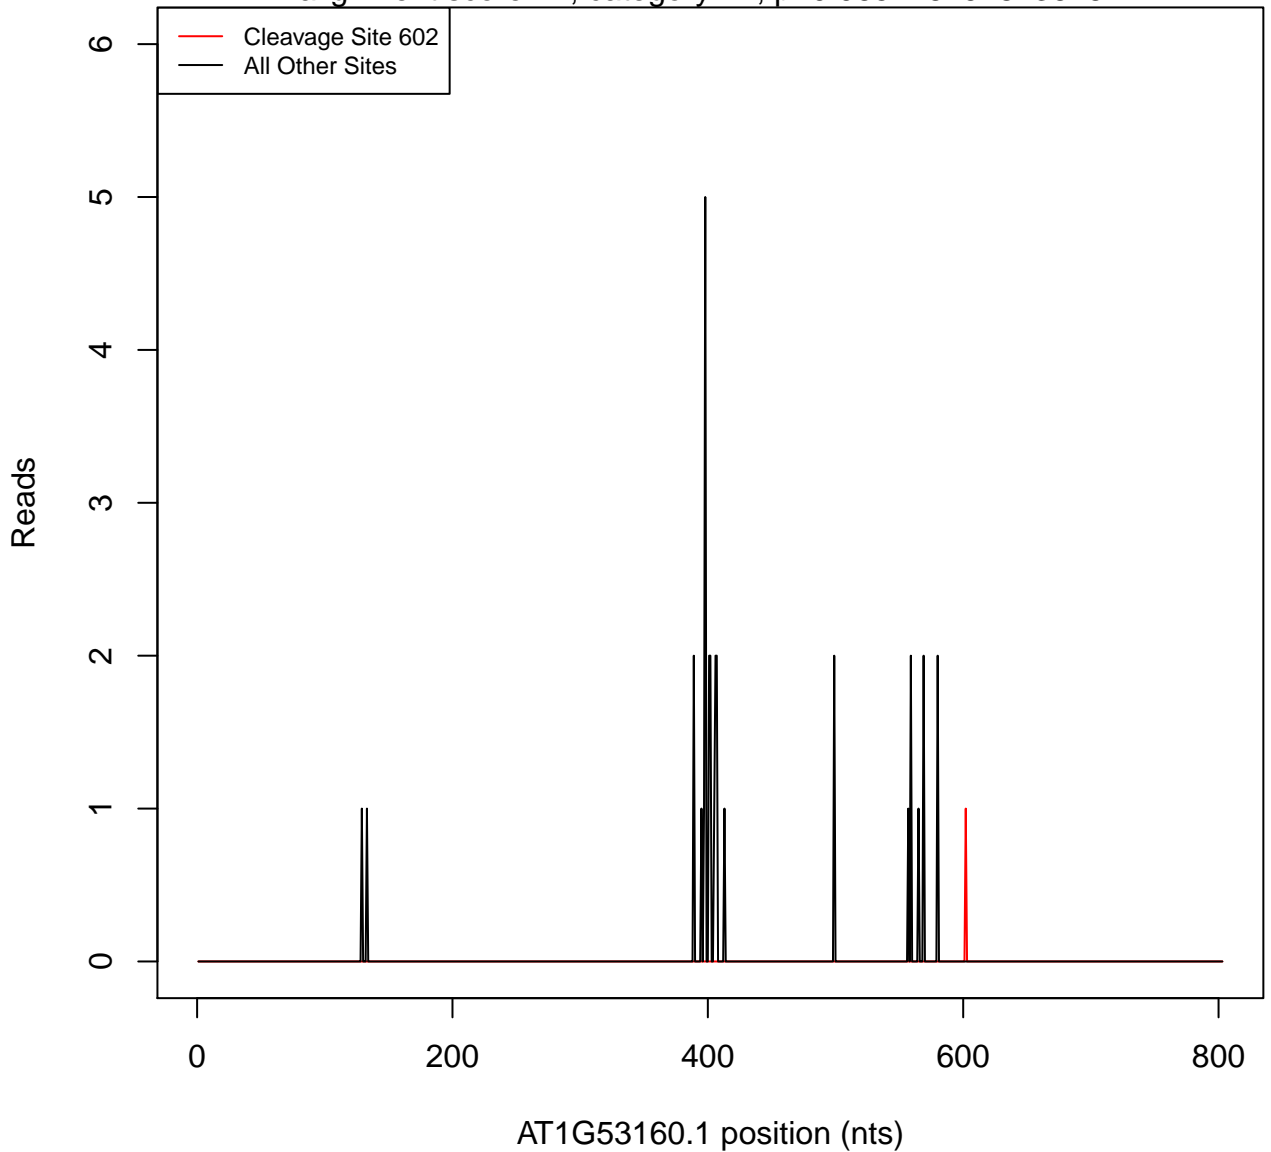

# ath-miR156e slicing AT1G53160.1 at nt 602

alignment score=2 , category=4 , p=0.0654767918236761



# ath-miR156f slicing AT1G53160.1 at nt 602

alignment score=2 , category=4 , p=0.0654767918236761



# ath-miR156g slicing AT1G53160.1 at nt 602

alignment score=3 , category=4 , p=0.0538993358227995

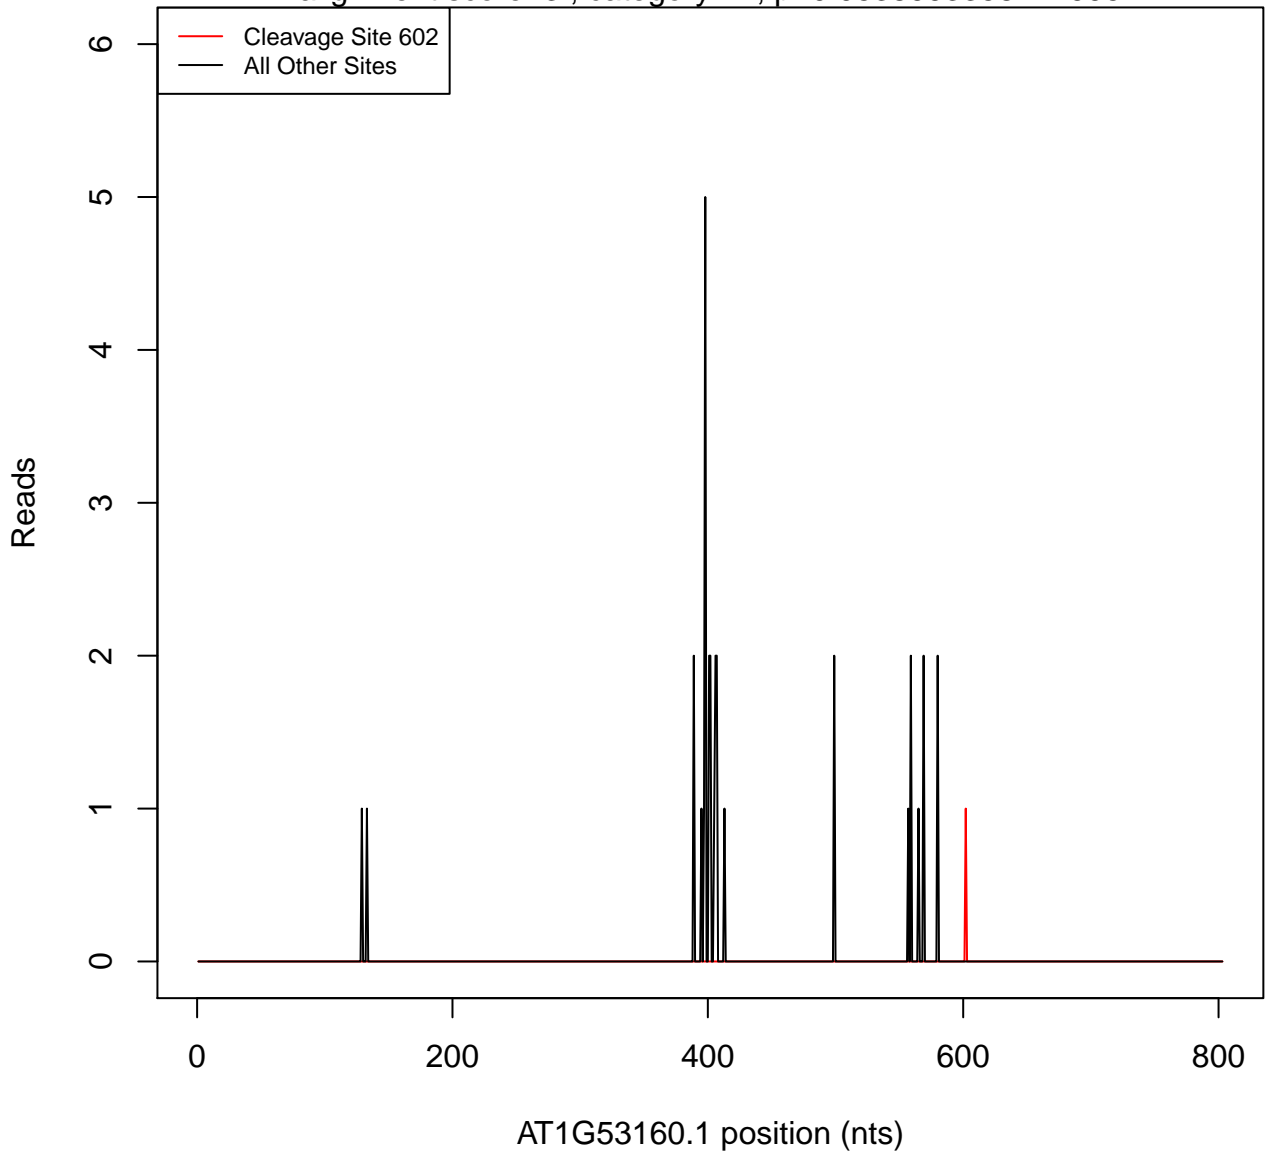

# ath-miR156i slicing AT1G53160.1 at nt 602

alignment score=0 , category=4 , p=0.0882084166873425

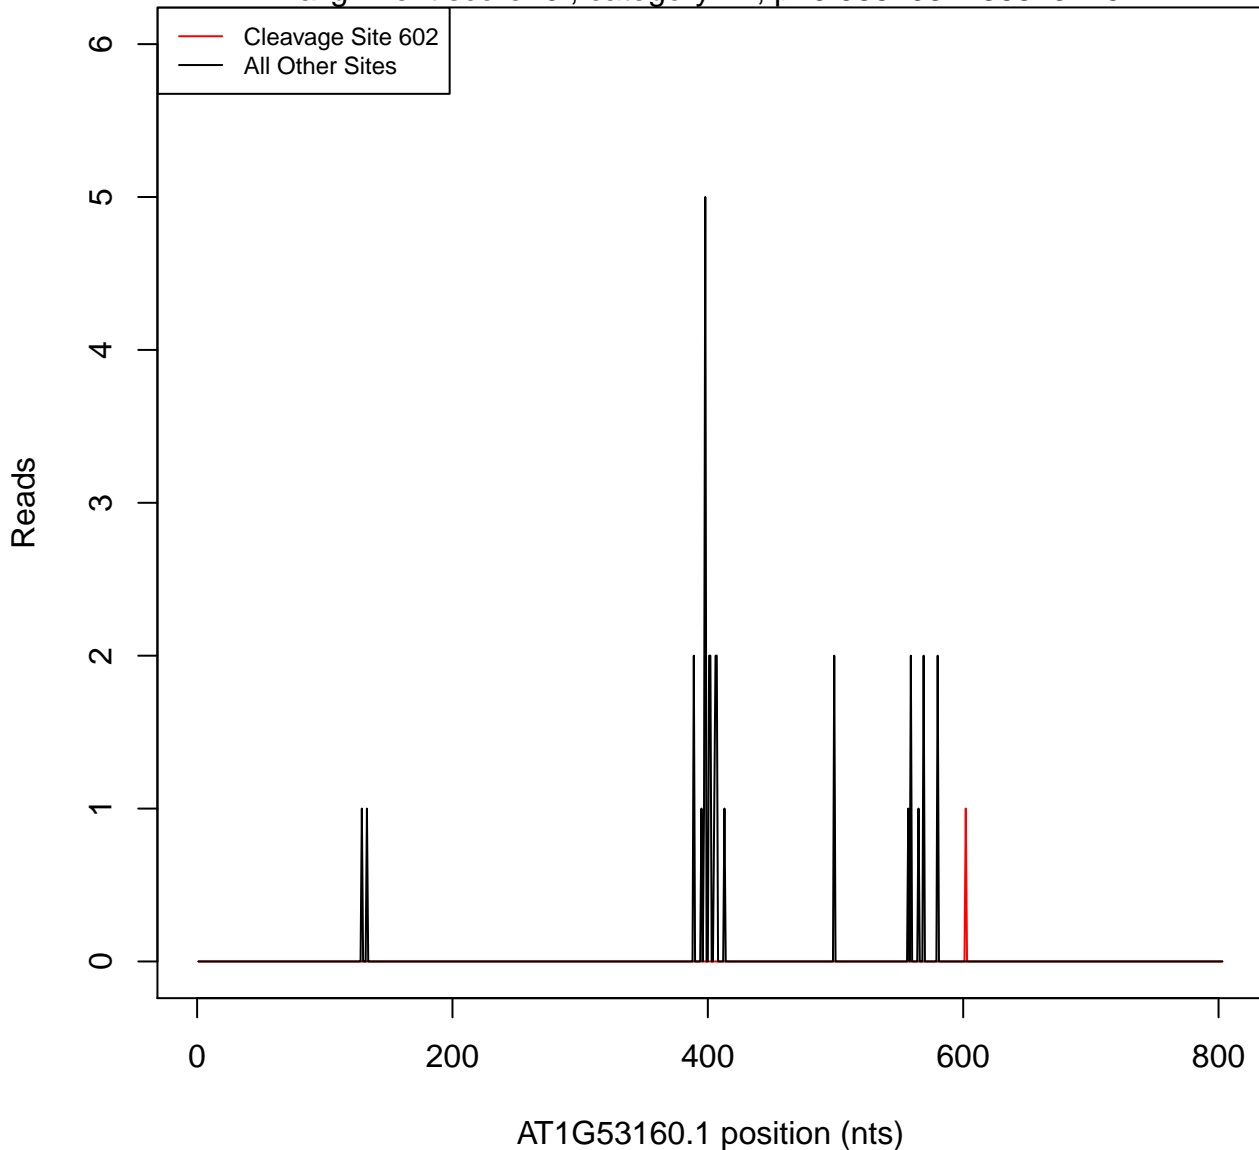

# ath-miR156j slicing AT1G53160.1 at nt 602

alignment score=1 , category=4 , p=0.0769125742241341

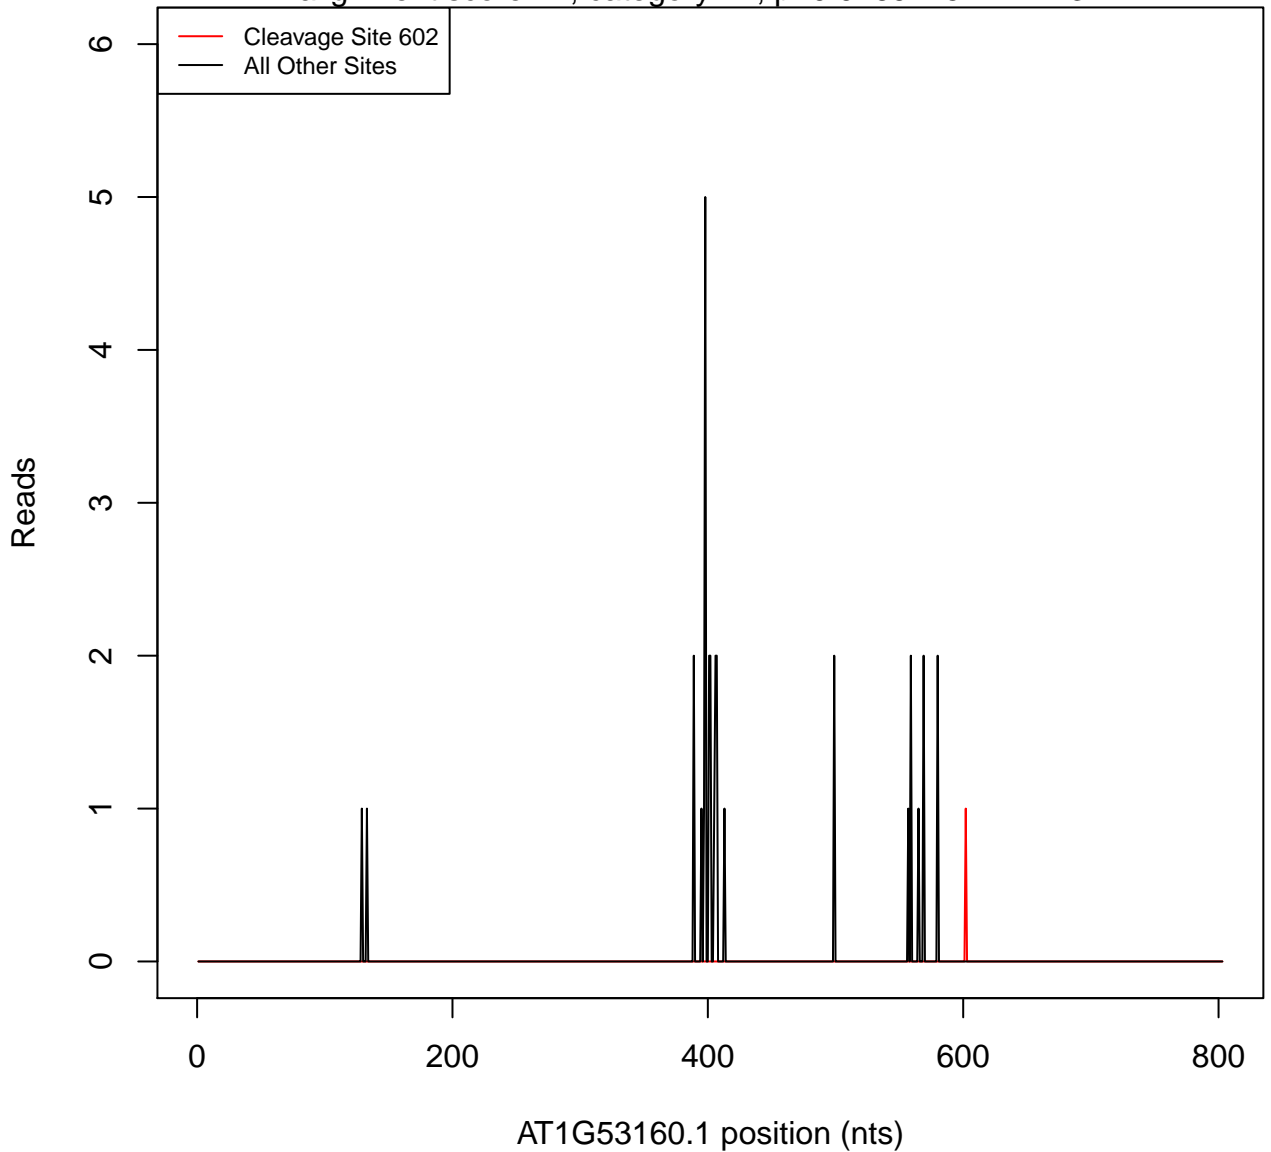

# ath-miR400 slicing AT1G62720.1 at nt 996

alignment score=1 , category=4 , p=0.0769125742241341

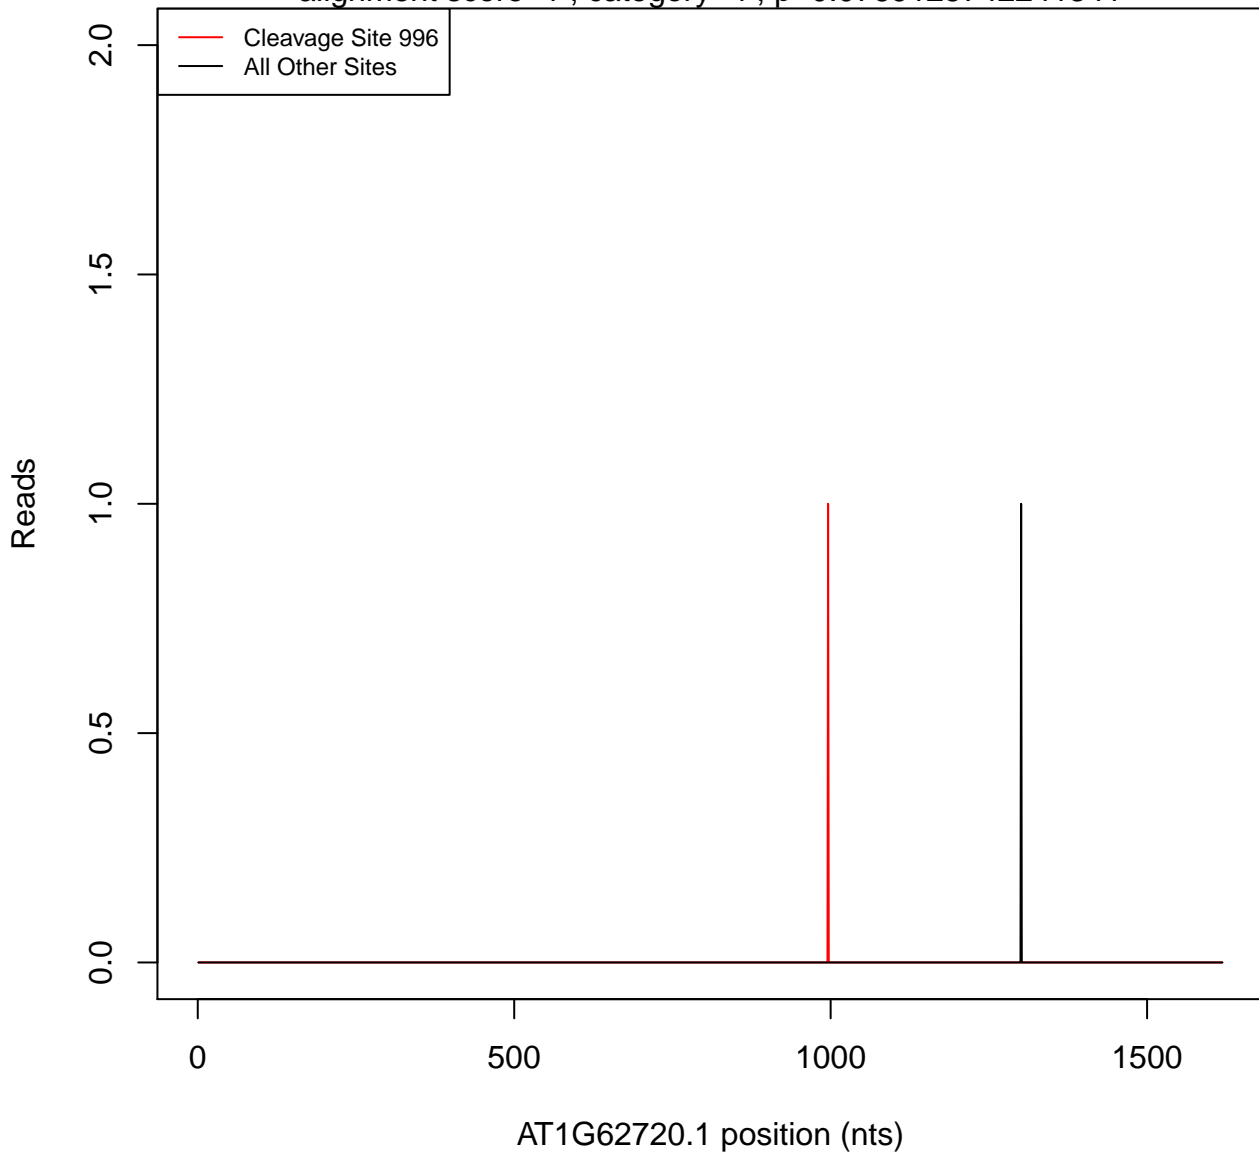



# ath-miR156a slicing AT1G69170.1 at nt 1307

alignment score=1 , category=1 , p=0.0450963217040095

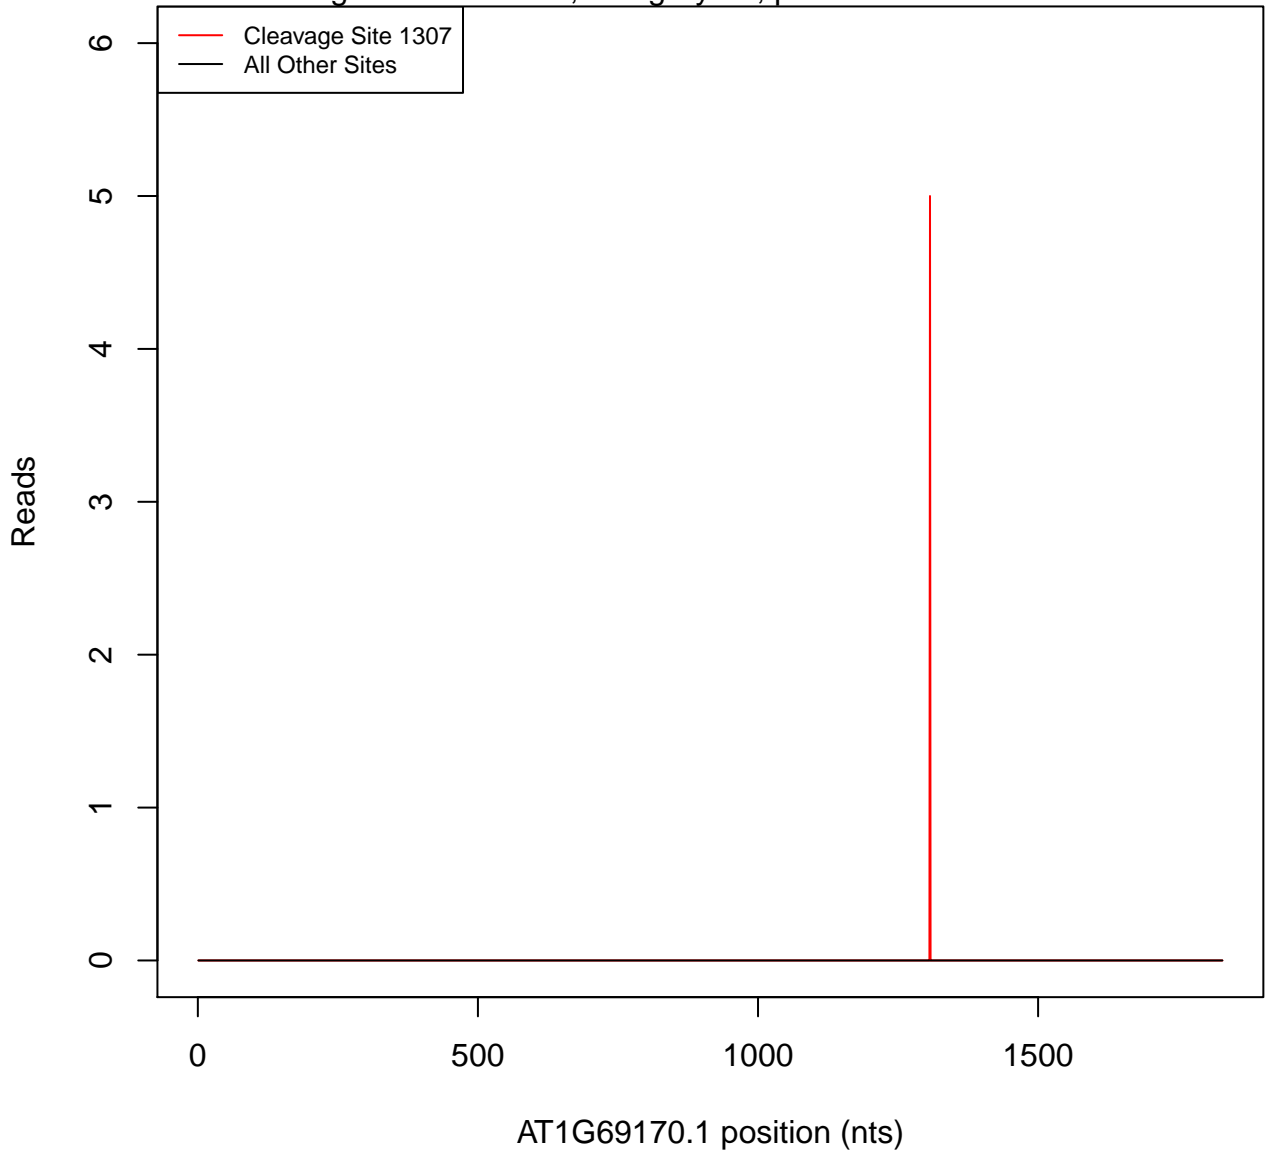

# ath-miR156b slicing AT1G69170.1 at nt 1307

alignment score=1 , category=1 , p=0.0450963217040095

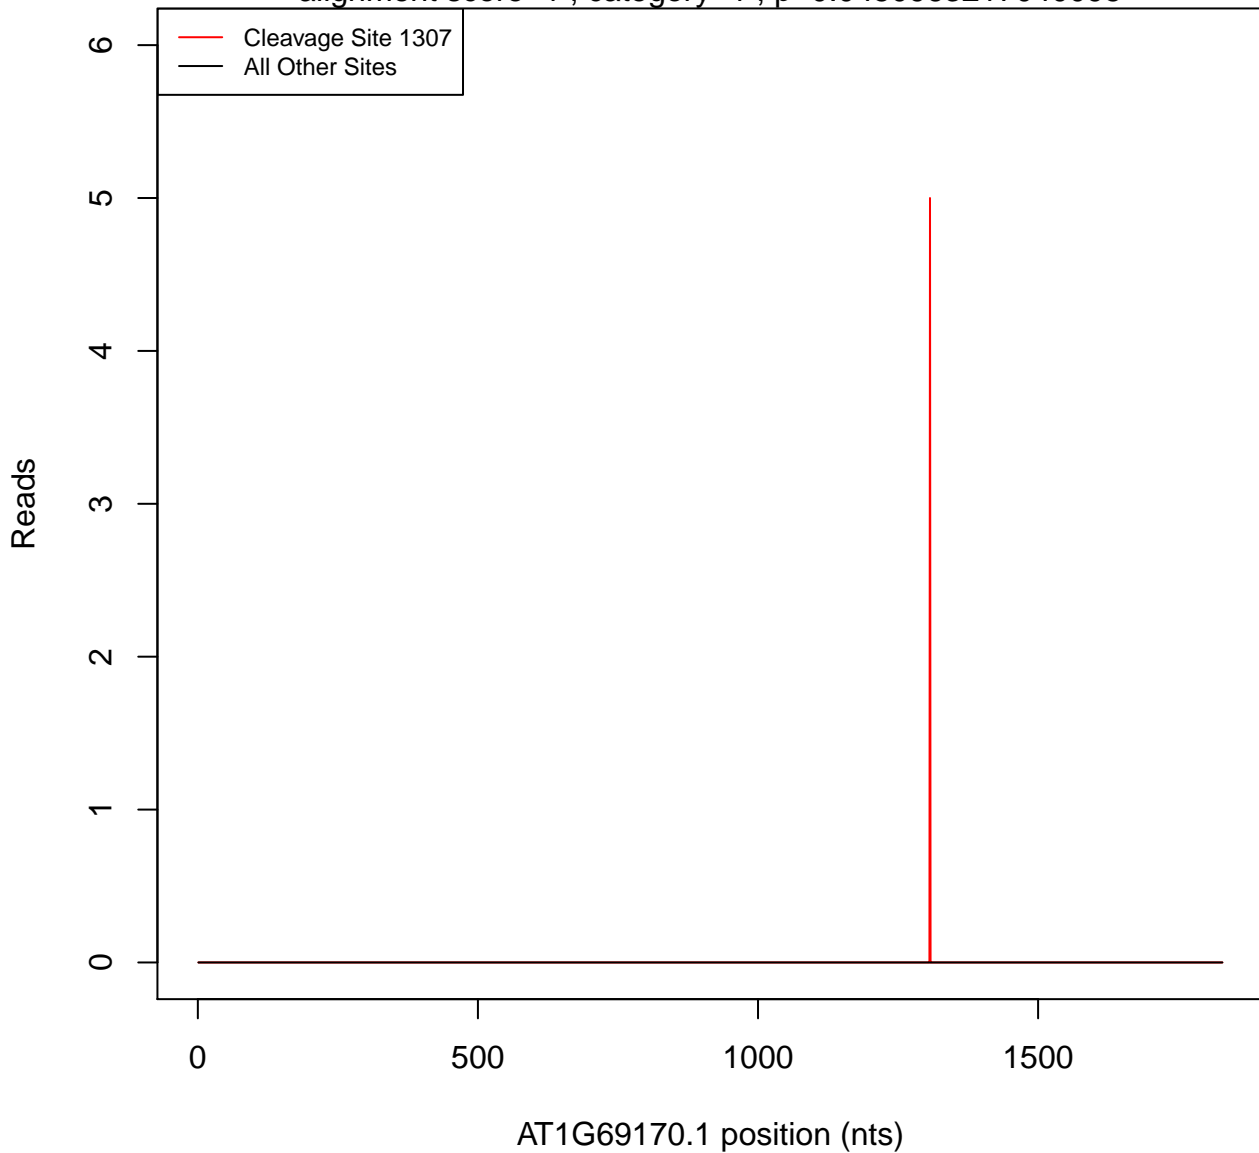

# ath-miR156c slicing AT1G69170.1 at nt 1307

alignment score=1 , category=1 , p=0.0450963217040095



# ath-miR156d slicing AT1G69170.1 at nt 1307

alignment score=1 , category=1 , p=0.0450963217040095

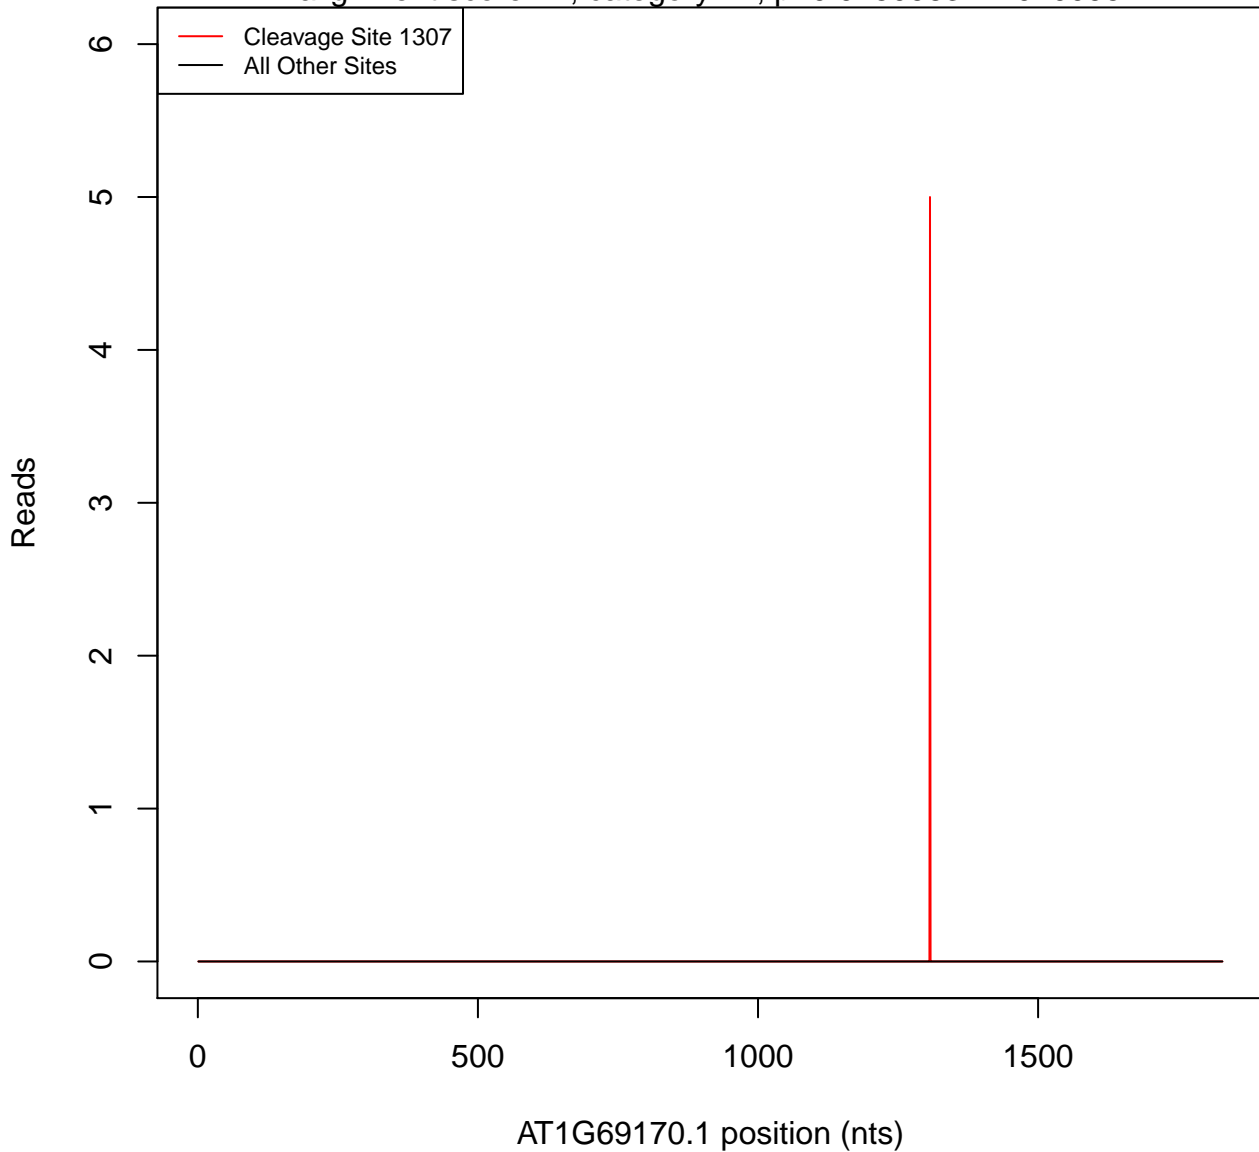

# ath-miR156e slicing AT1G69170.1 at nt 1307

alignment score=1 , category=1 , p=0.0450963217040095



# ath-miR156f slicing AT1G69170.1 at nt 1307

alignment score=1 , category=1 , p=0.0450963217040095



# ath-miR156g slicing AT1G69170.1 at nt 1307

alignment score=2 , category=1 , p=0.0382931489502008

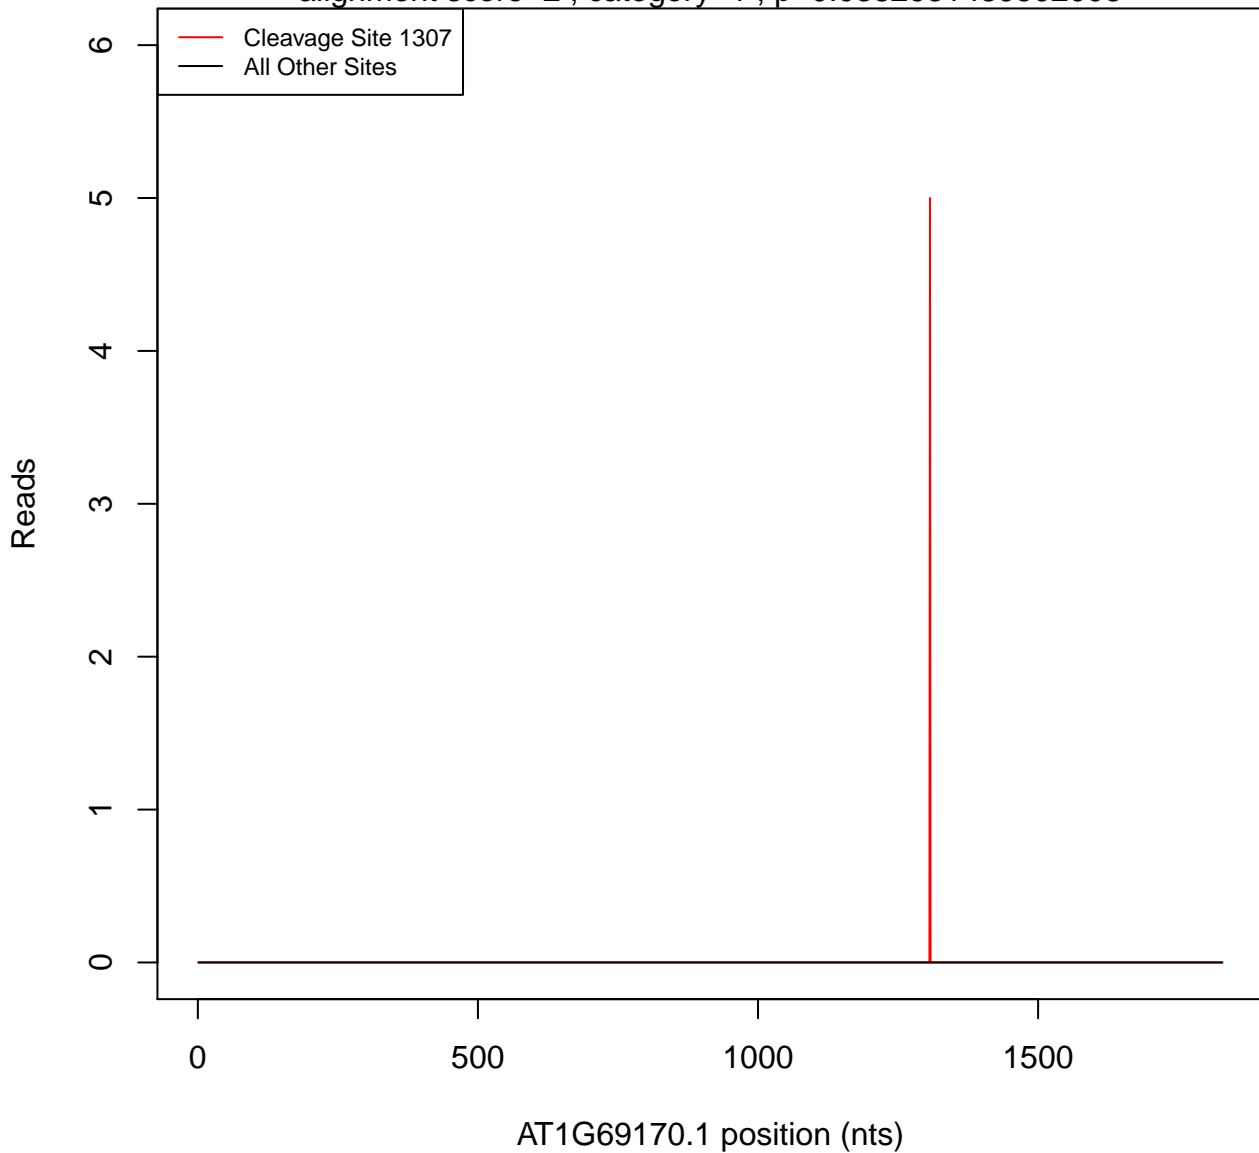

# ath-miR156h slicing AT1G69170.1 at nt 1307

alignment score=2 , category=1 , p=0.0427007148765035

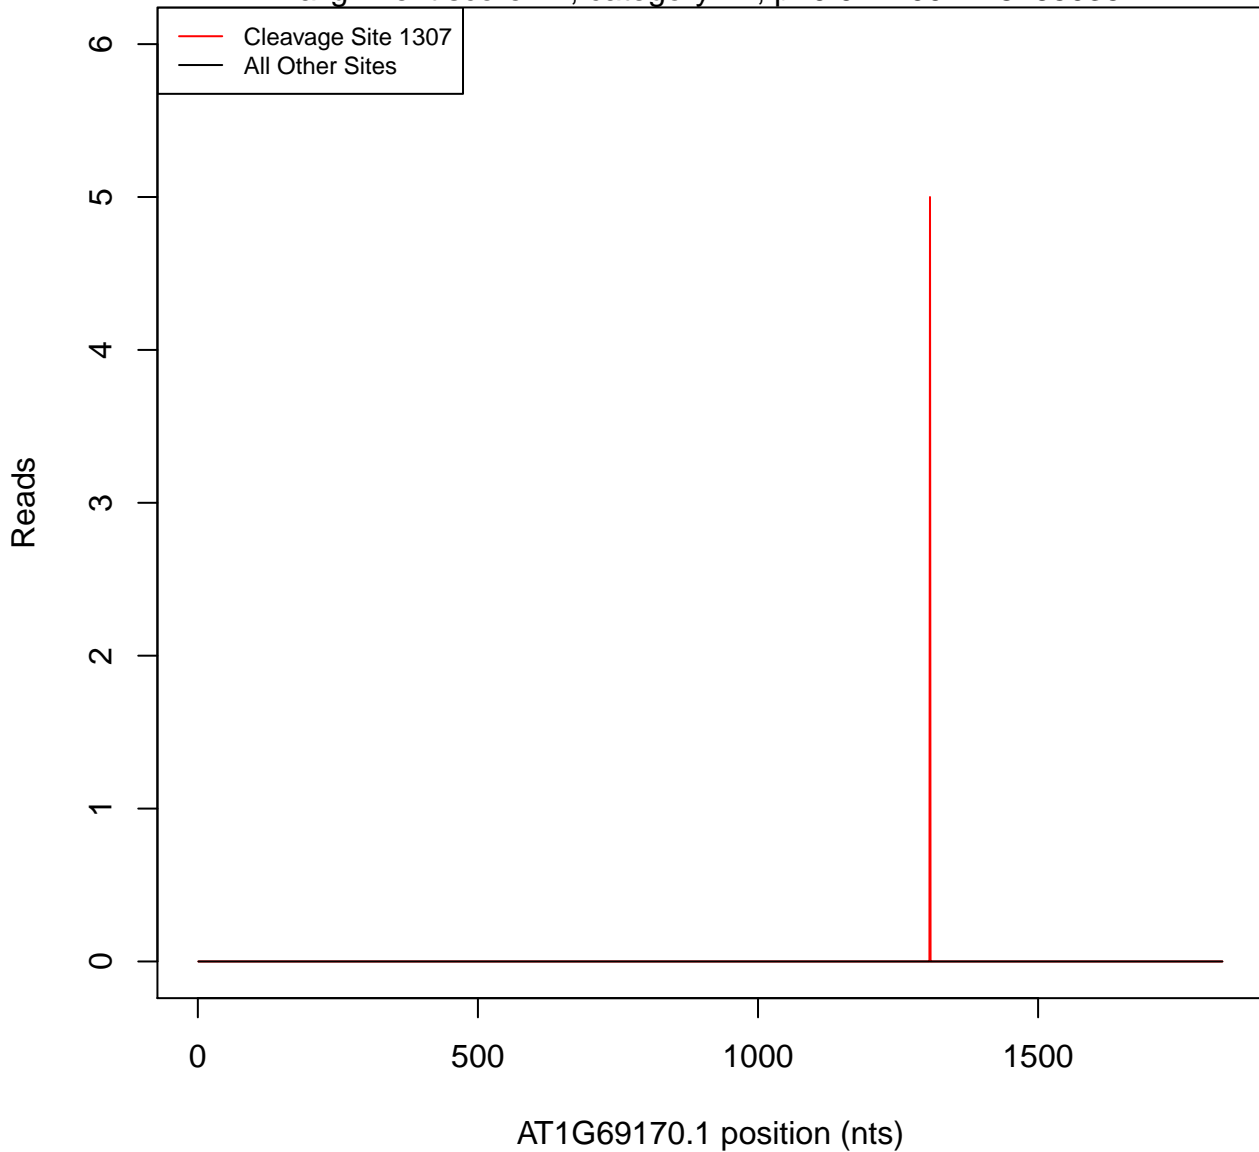



# ath-miR156i slicing AT1G69170.1 at nt 1307

alignment score=1 , category=1 , p=0.0476847978043028

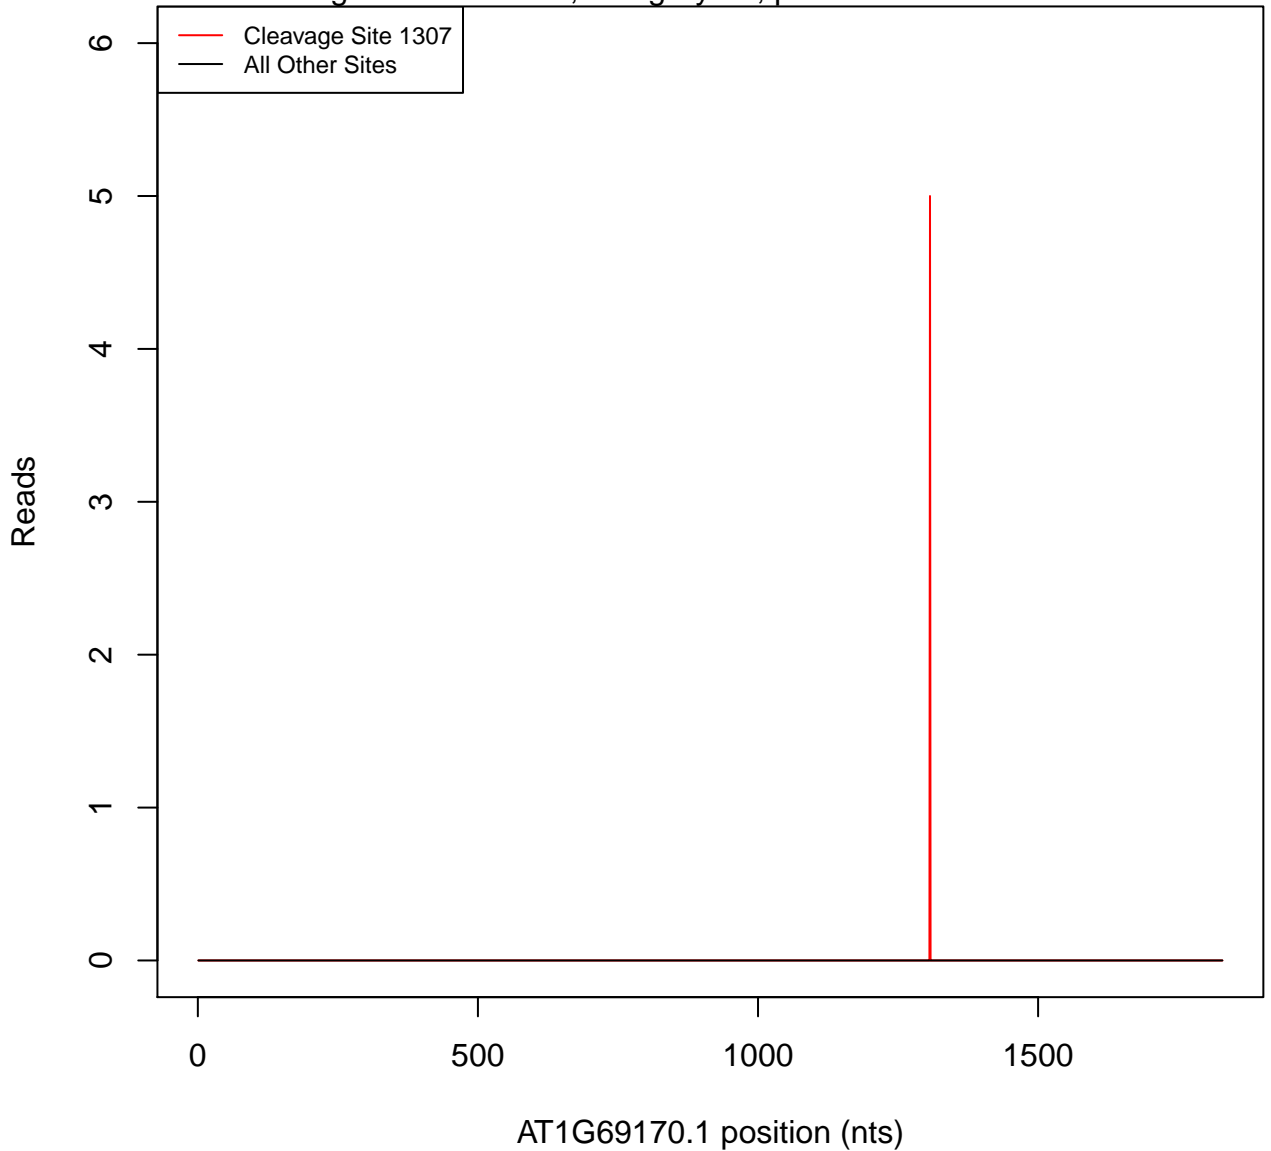

# ath-miR156j slicing AT1G69170.1 at nt 1307

alignment score=0 , category=1 , p=0.0518513683999995

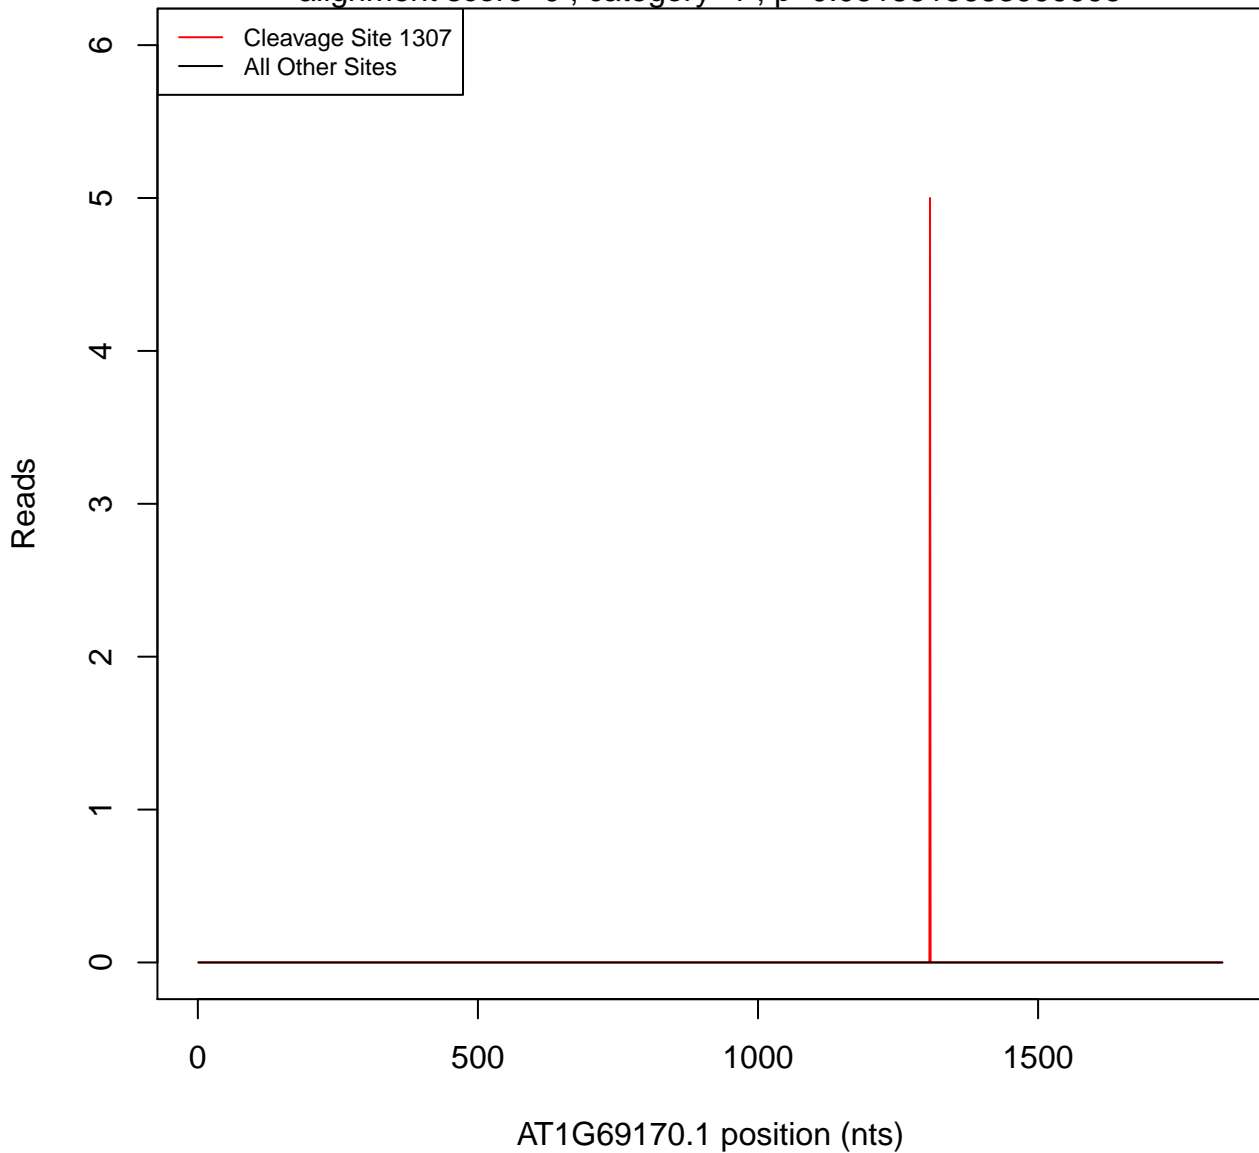

# ath-miR157d slicing AT1G69170.1 at nt 1307

alignment score=2 , category=1 , p=0.0427007148765035



# ath-miR160a slicing AT1G77850.1 at nt 1420

alignment score=0.5 , category=0 , p=0.00386304601534071

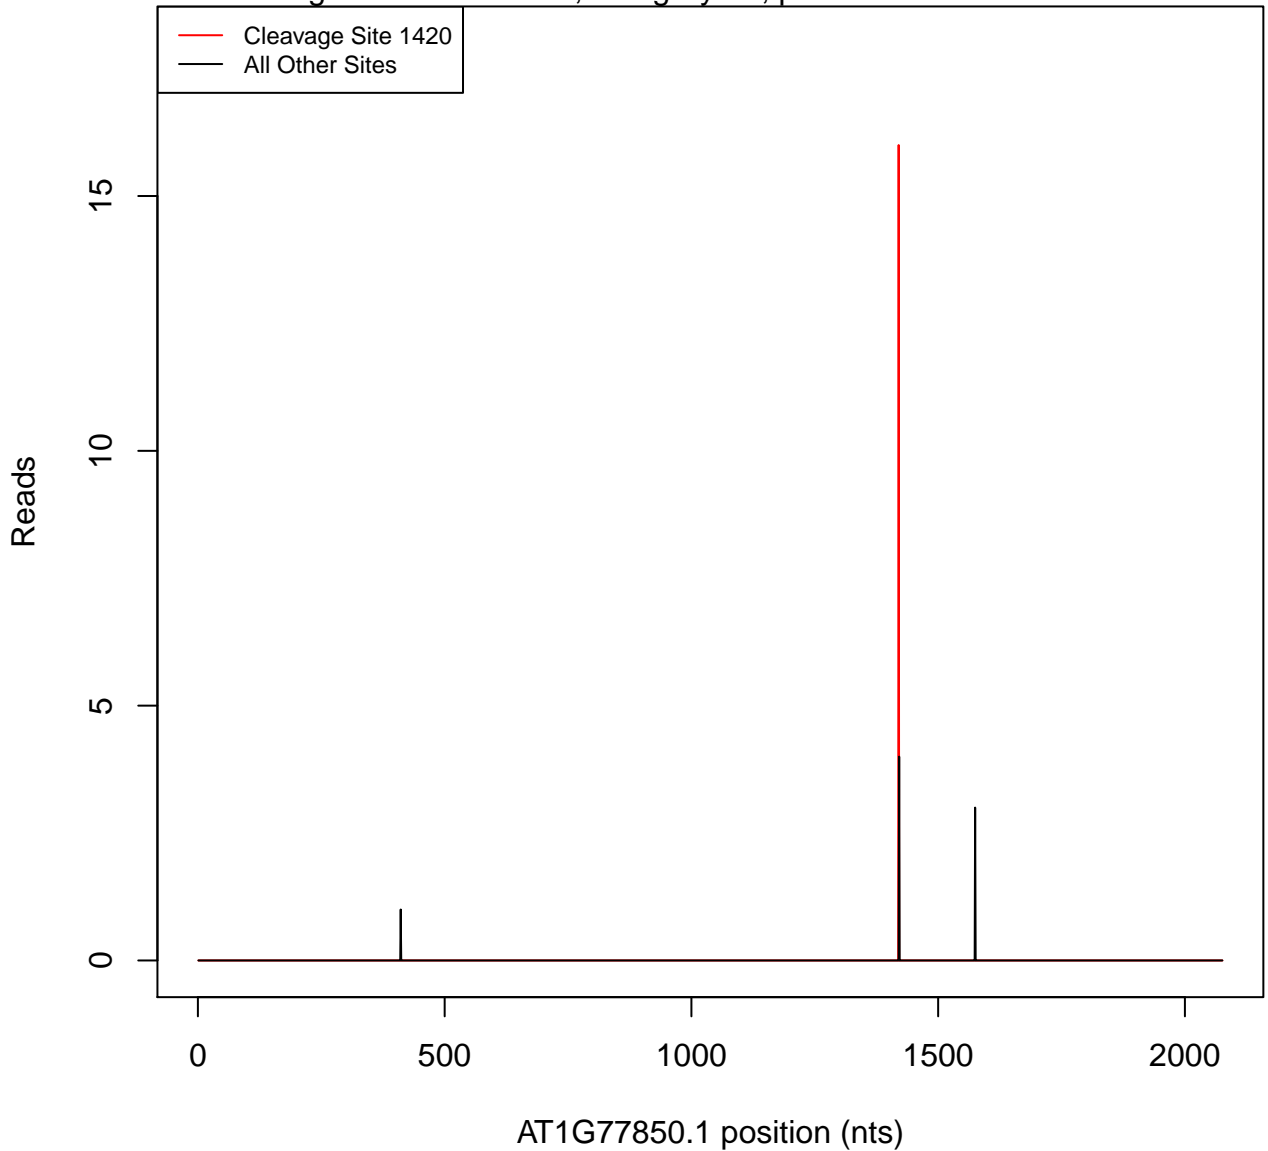

# ath-miR160b slicing AT1G77850.1 at nt 1420

alignment score=0.5 , category=0 , p=0.00386304601534071

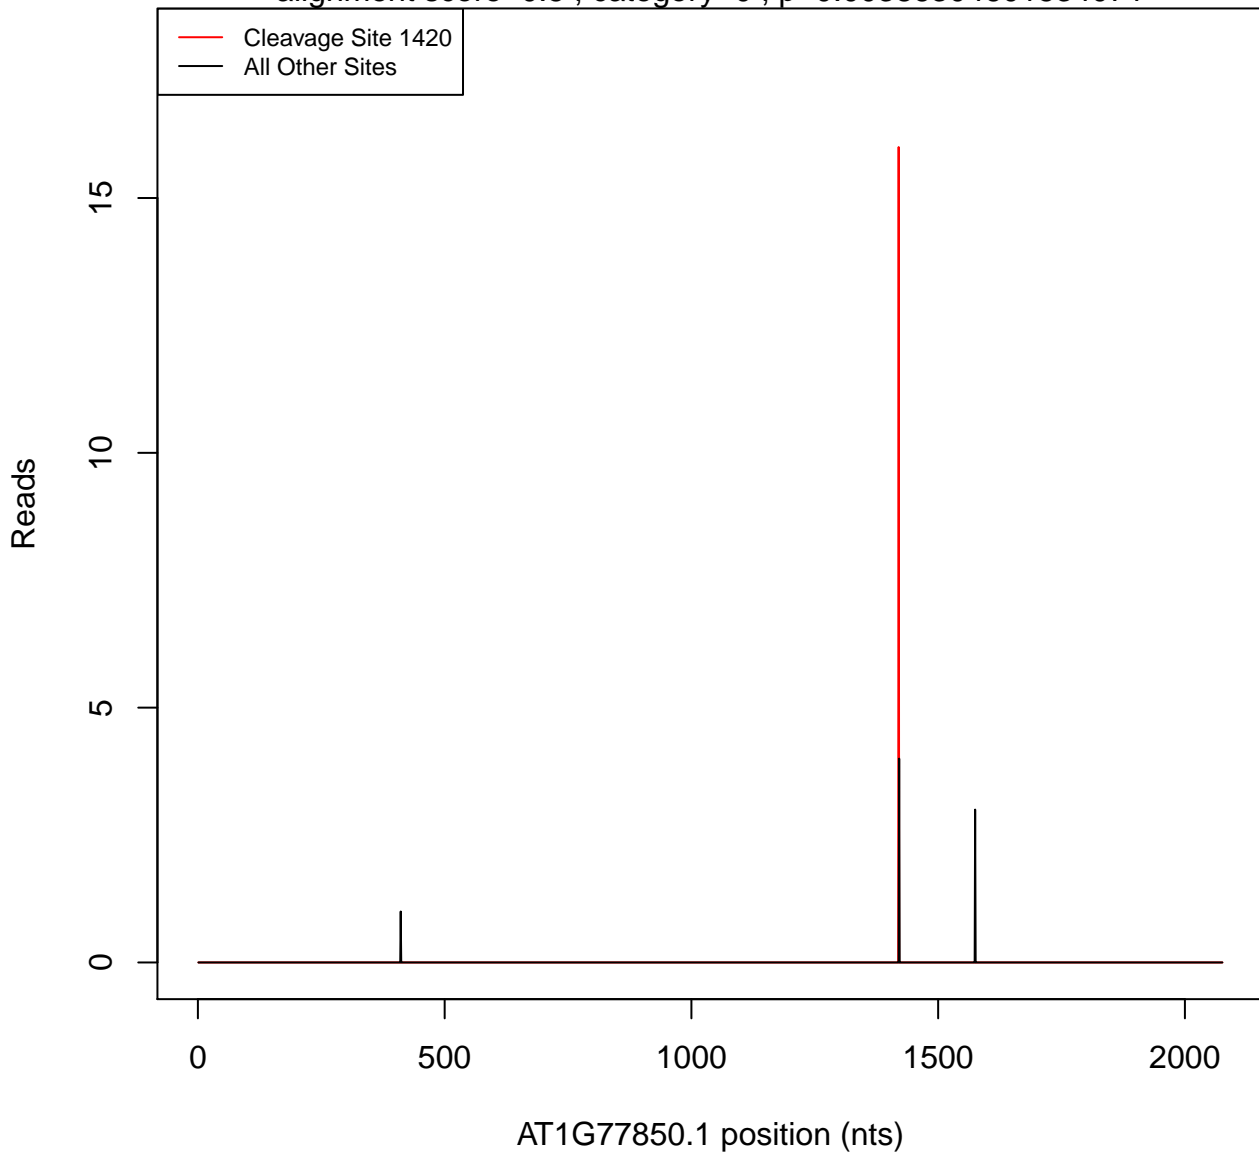

# ath-miR160c slicing AT1G77850.1 at nt 1420

alignment score=0.5 , category=0 , p=0.00386304601534071



# ath-miR414 slicing AT2G21420.1 at nt 1211

alignment score=2 , category=0 , p=0.0954857610150979

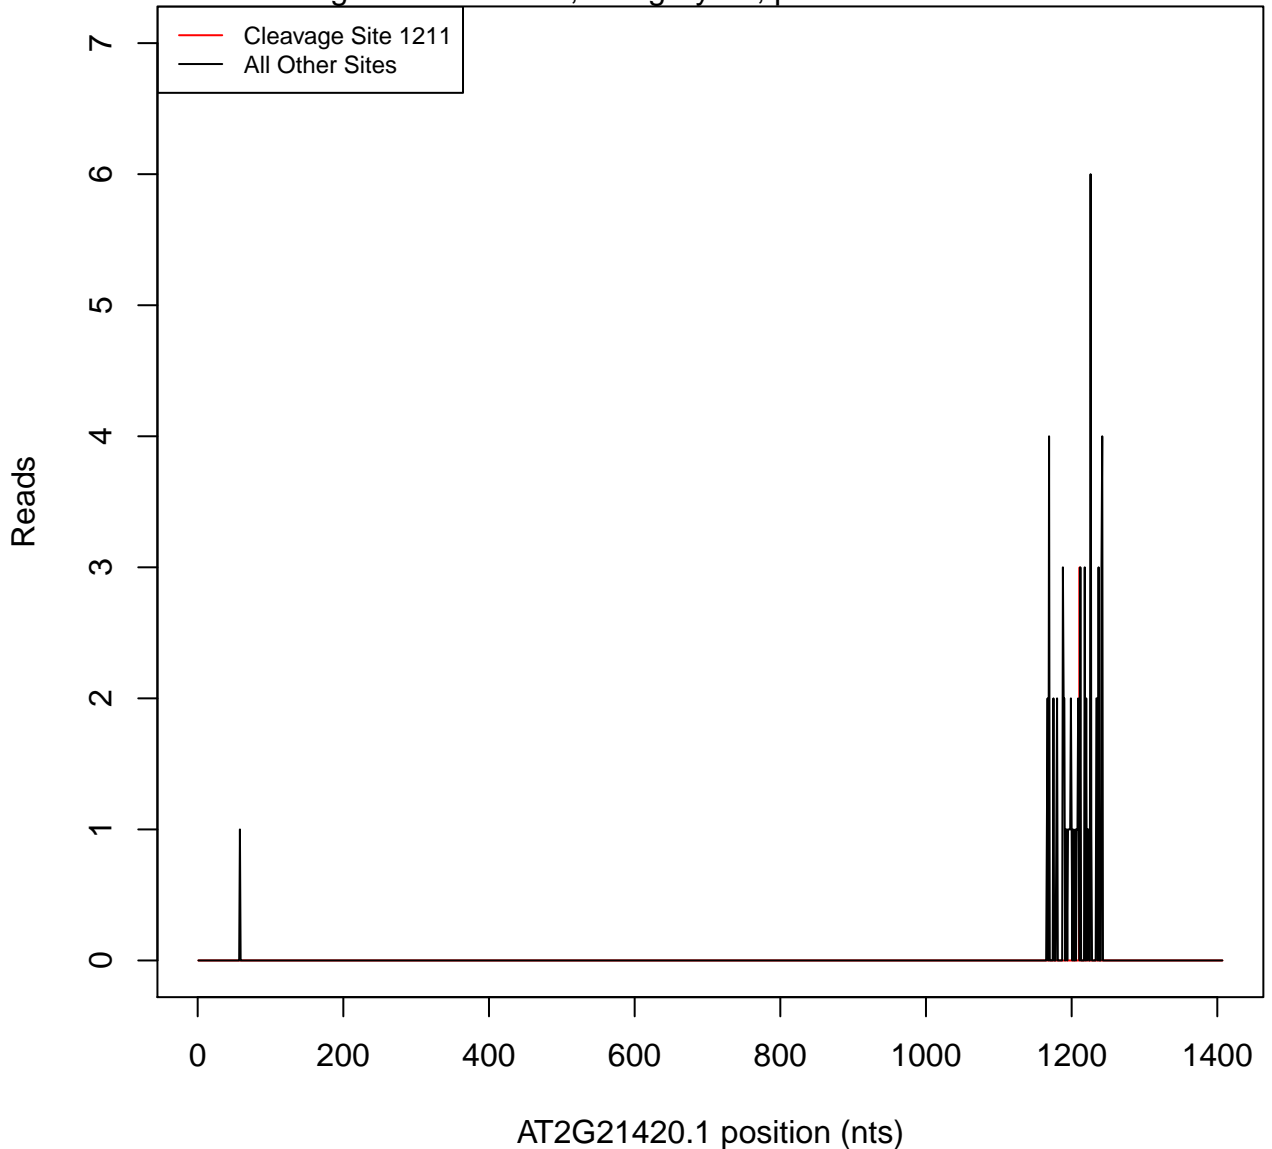

# ath-miR171b slicing AT2G45160.1 at nt 1011

alignment score=3 , category=0 , p=0.00743679665462849

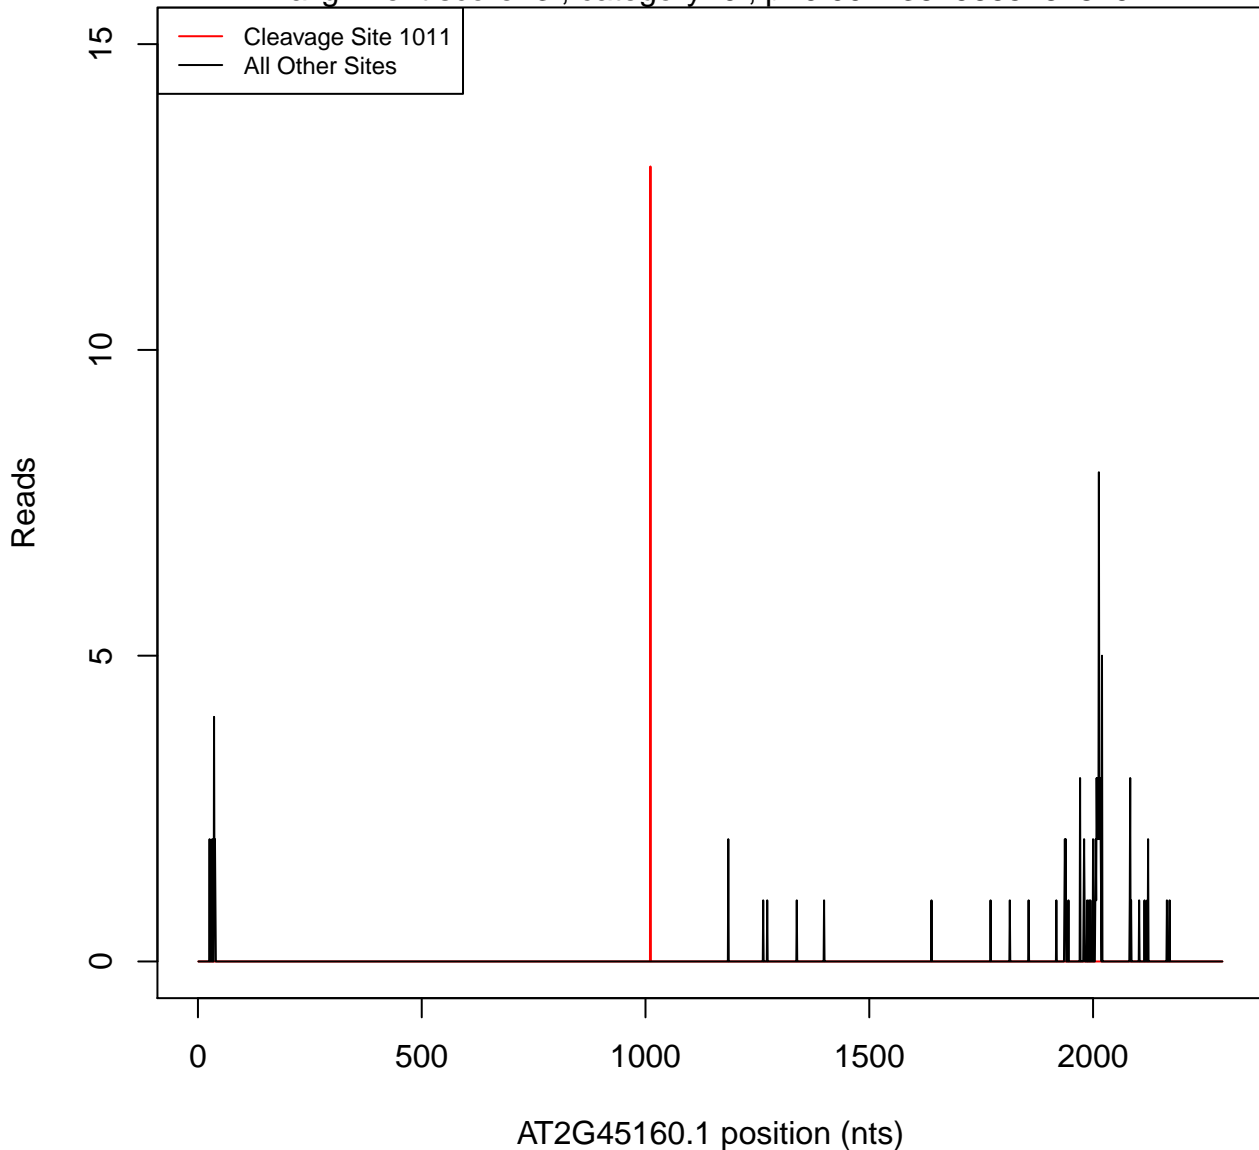



# ath-miR171c slicing AT2G45160.1 at nt 1011

alignment score=3 , category=0 , p=0.00743679665462849

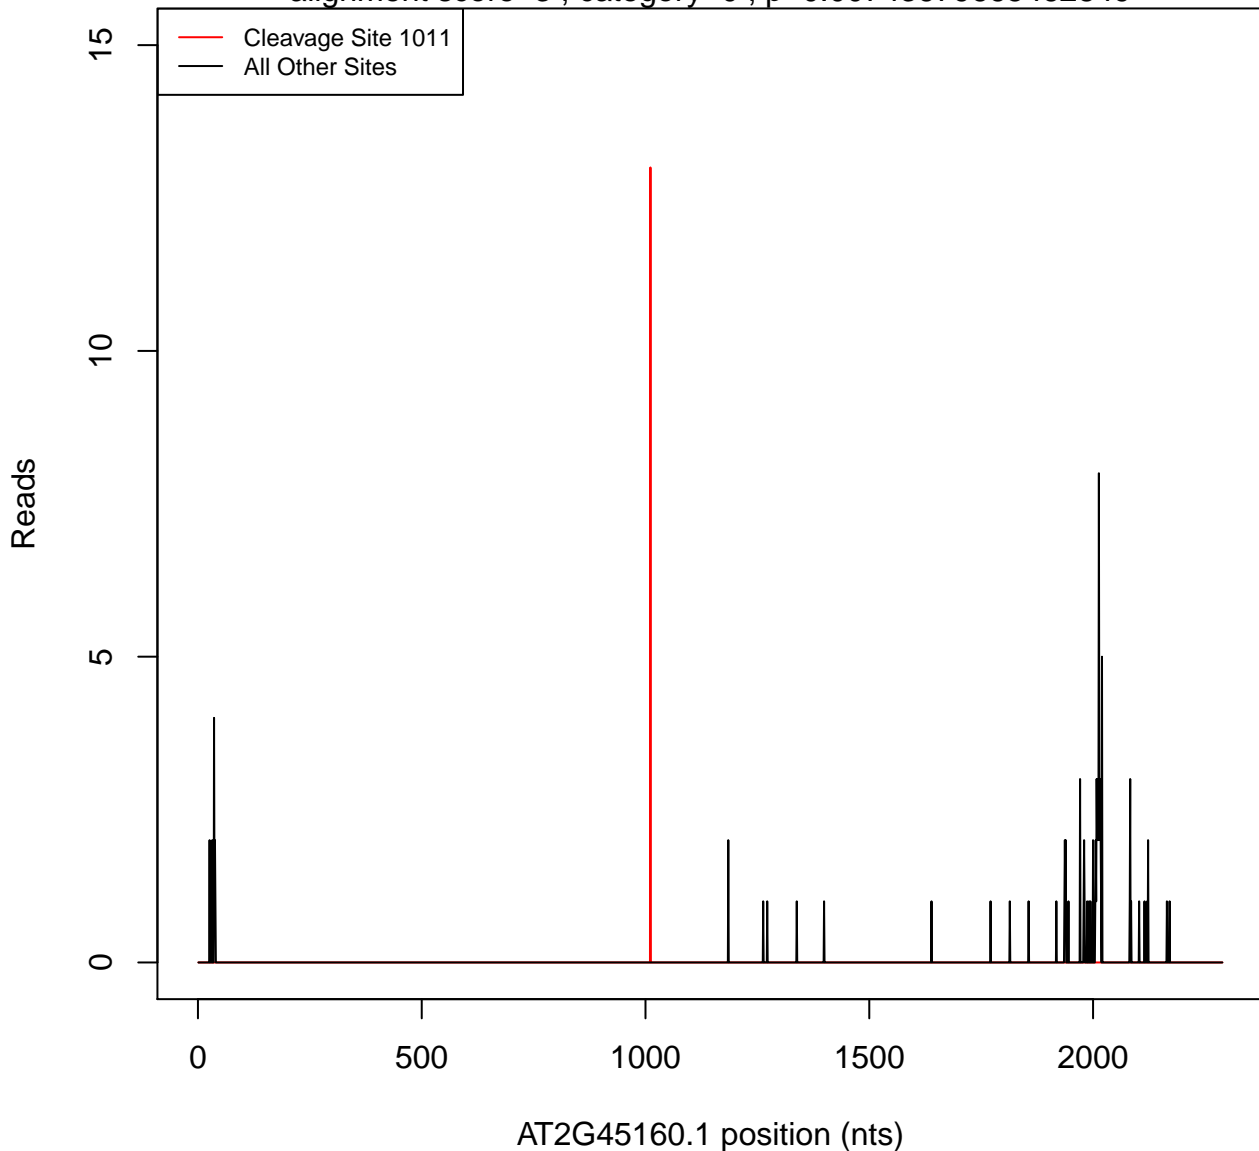

# ath-miR858b slicing AT2G47460.1 at nt 401

alignment score=2.5 , category=3 , p=0.0165940971961986

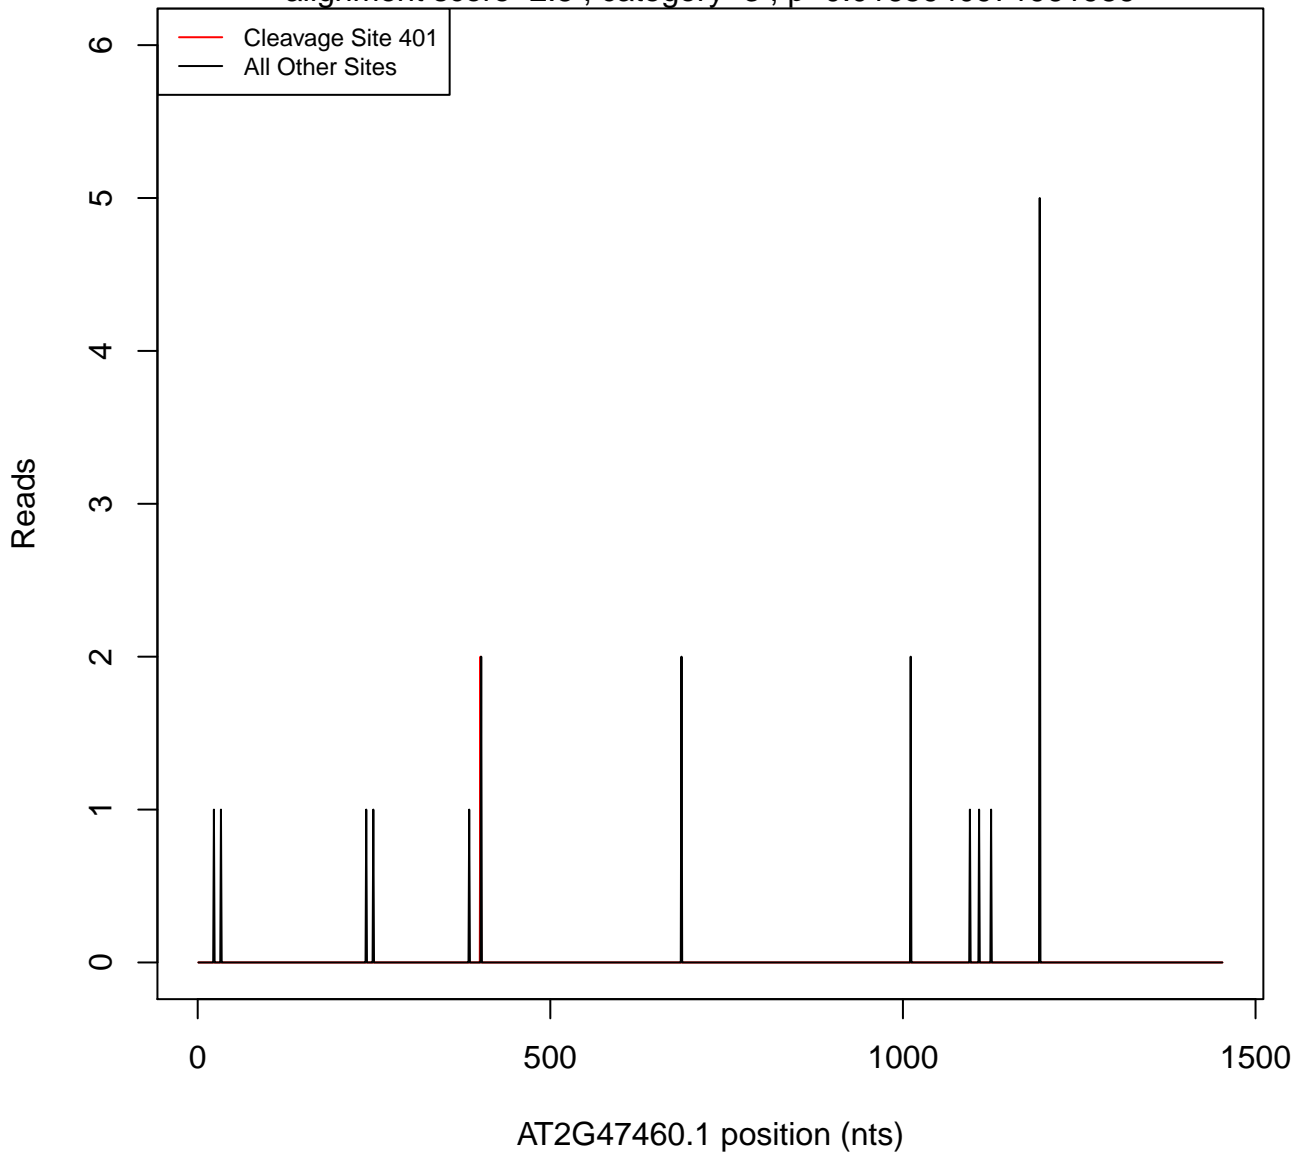

# ath-miR858 slicing AT2G47460.1 at nt 402

alignment score=3 , category=3 , p=0.0513448823026175

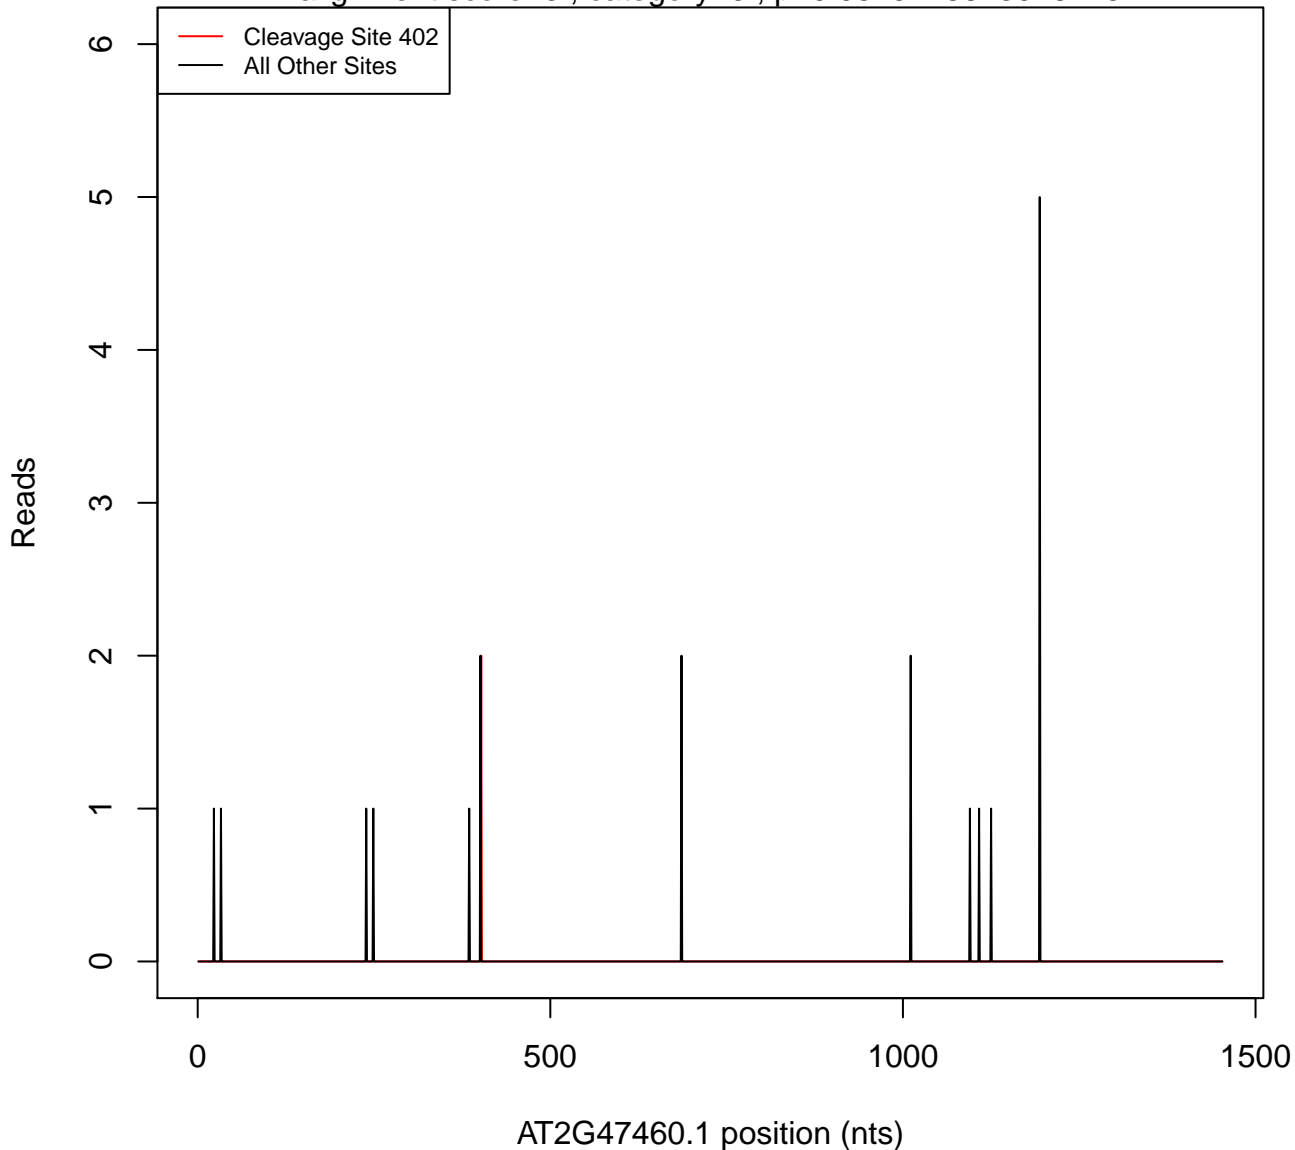

# ahy-miR159\_1ss7TC slicing AT3G11440.1 at nt 1166

alignment score=3.5 , category=0 , p=0.0109977260713117

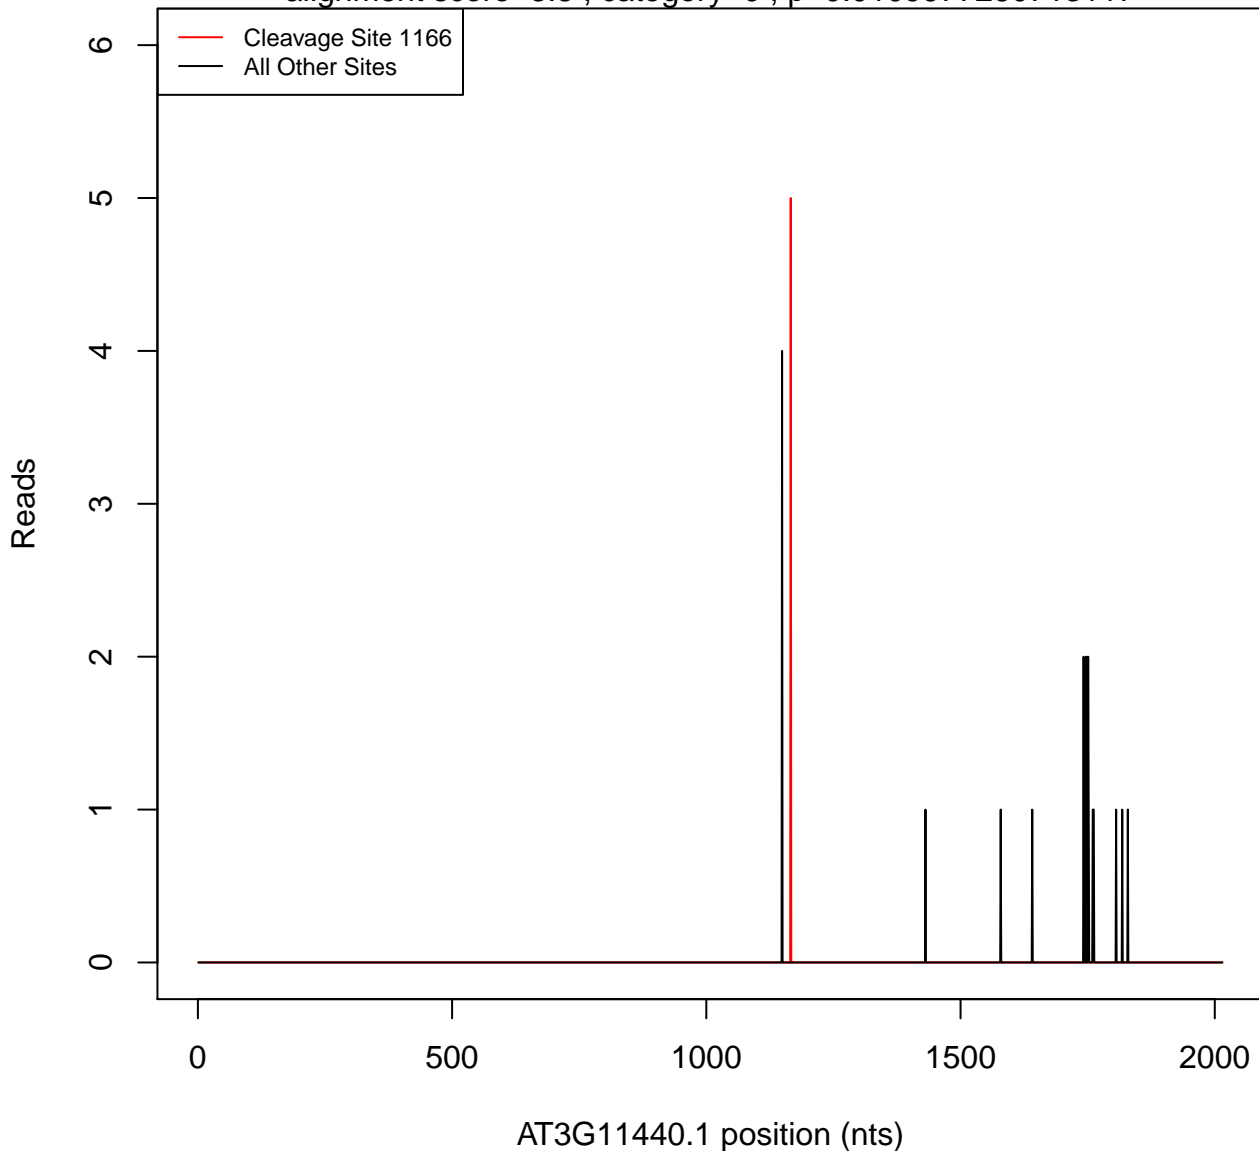

# ath-miR159a slicing AT3G11440.1 at nt 1166

alignment score=3.5 , category=0 , p=0.0131827145105711

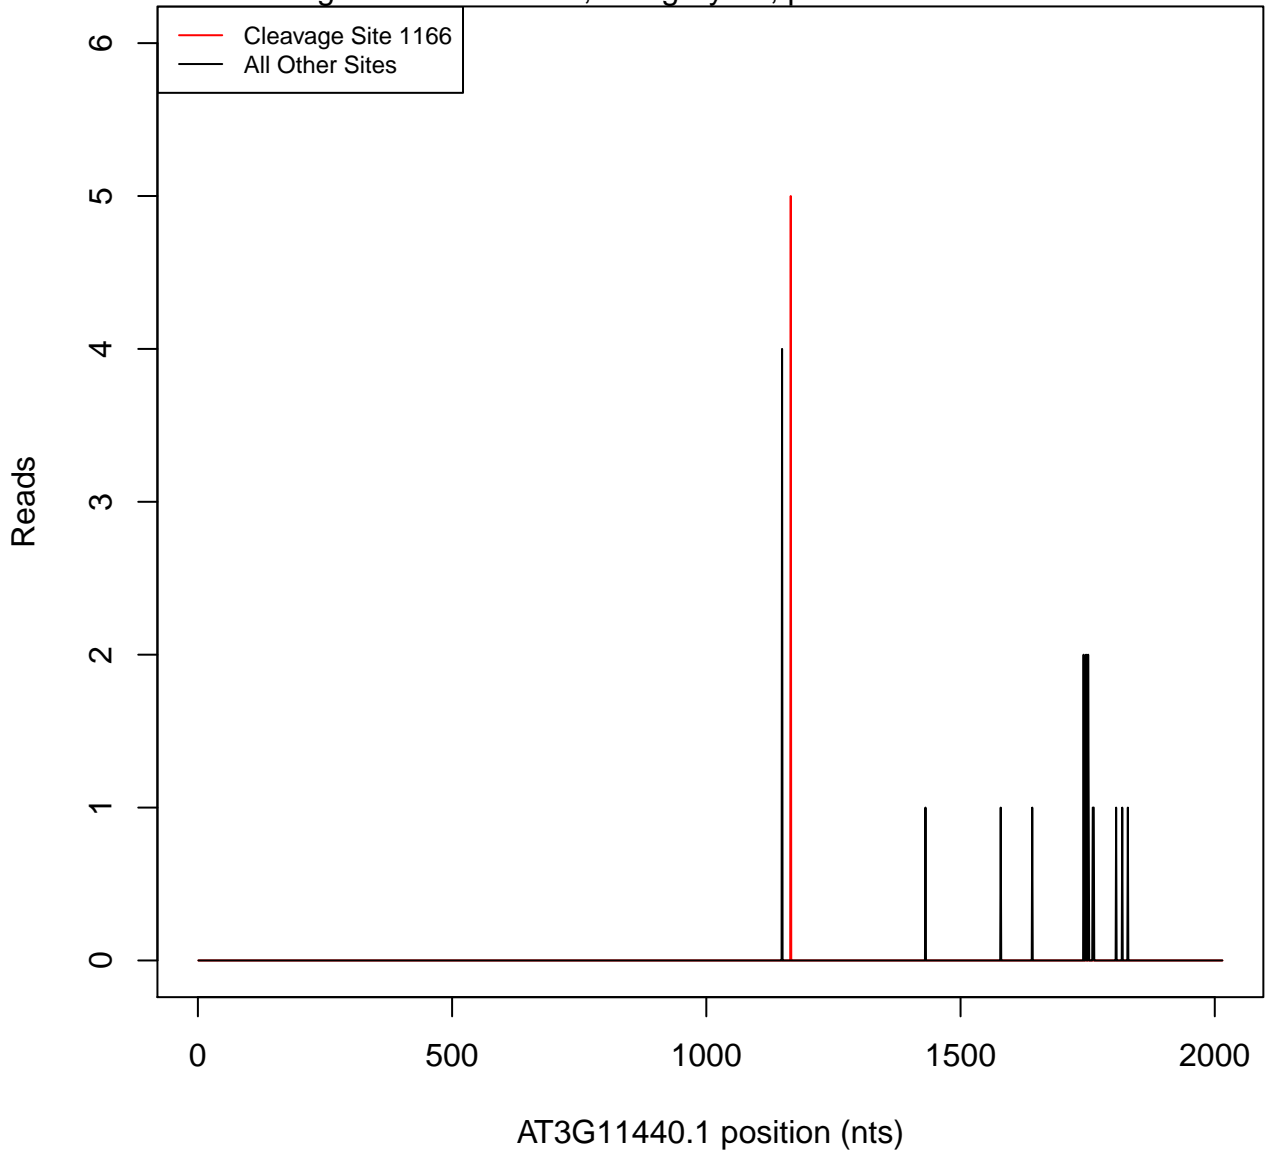

# ath-miR159b\_R-1 slicing AT3G11440.1 at nt 1166

alignment score=3.5 , category=0 , p=0.0240354606988191



# ath-miR159c slicing AT3G11440.1 at nt 1166

alignment score=4 , category=0 , p=0.0323641768265183

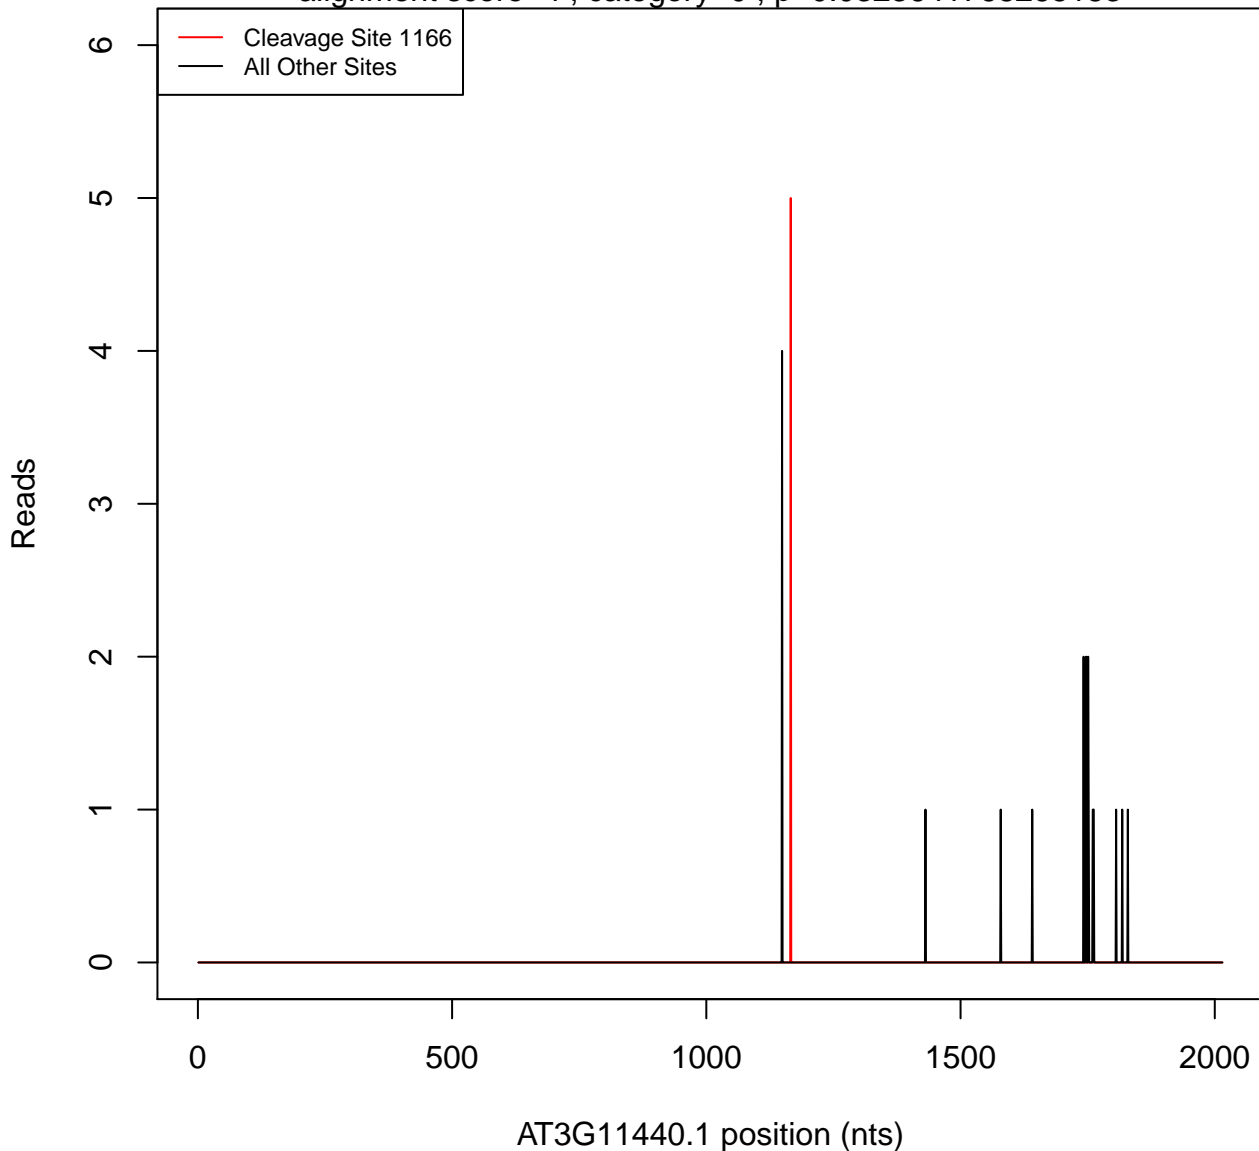

# ath-miR159c\_R-2 slicing AT3G11440.1 at nt 1166

alignment score=3 , category=0 , p=0.053269025793833

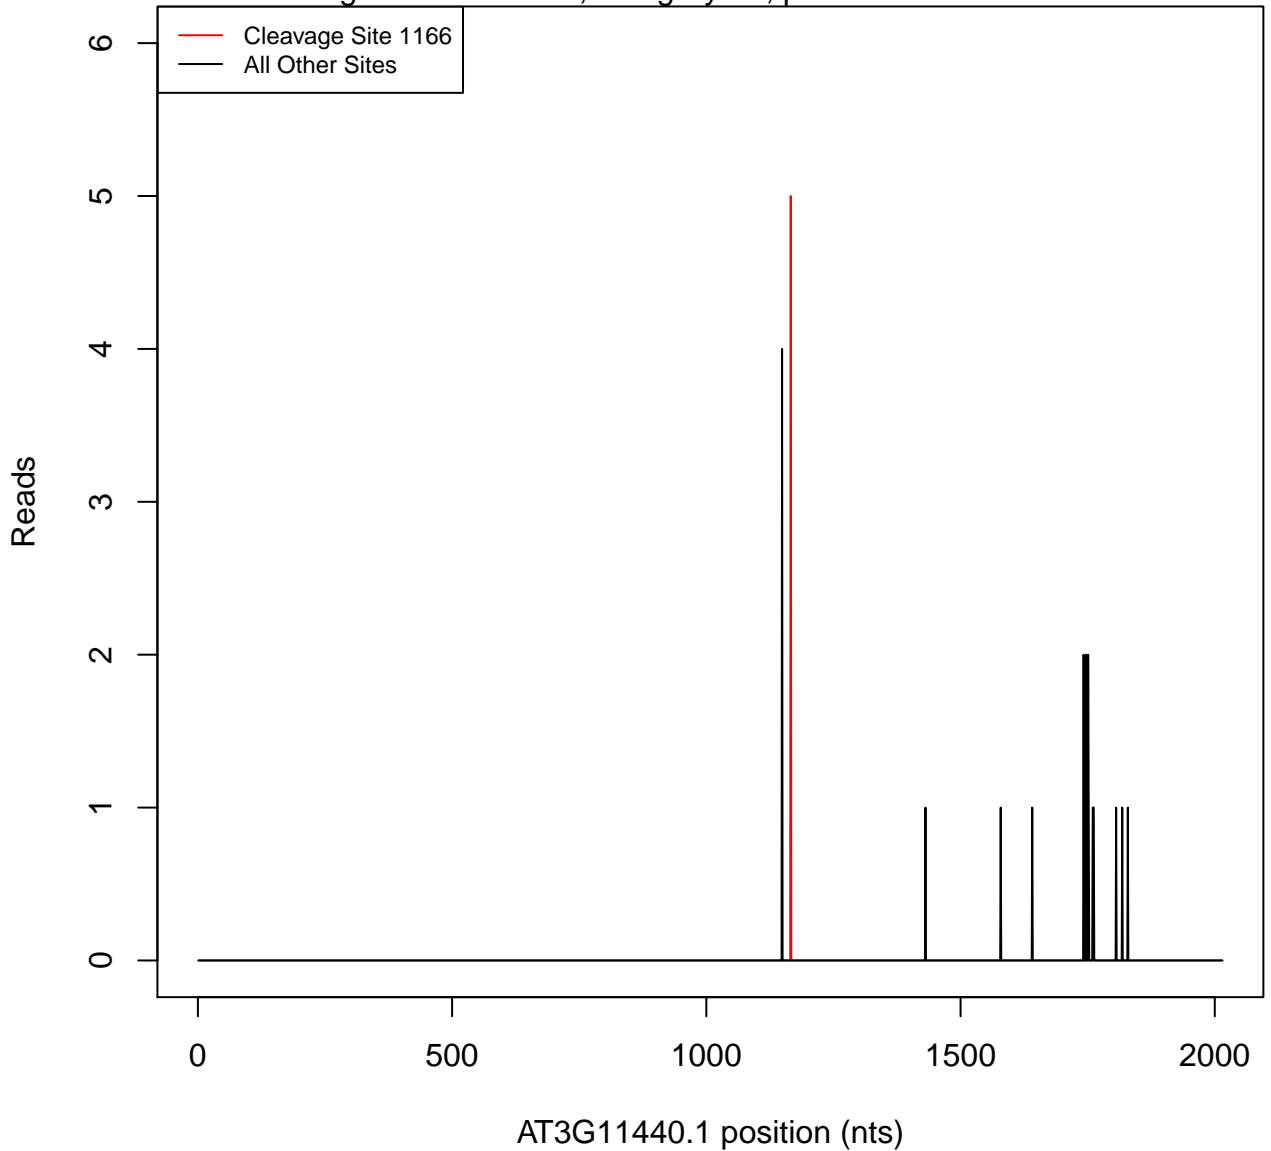



# ath-miR319c\_L+1R-1 slicing AT3G11440.1 at nt 1166

alignment score=4 , category=0 , p=0.0361021985375295

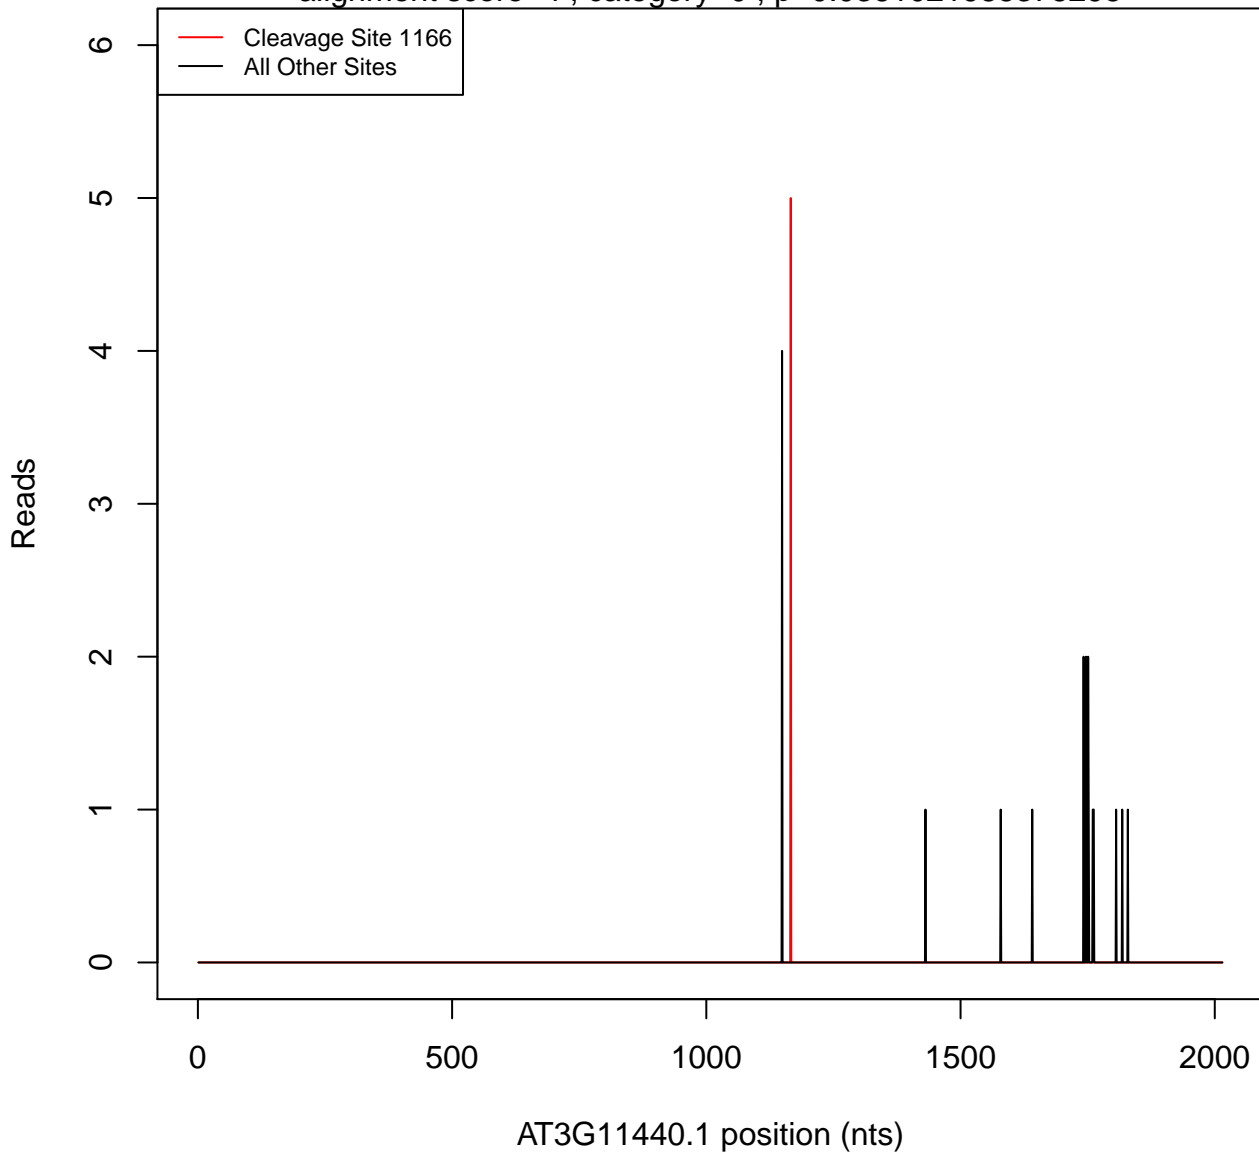

# ath-miR164a slicing AT3G15170.1 at nt 675

alignment score=3 , category=0 , p=0.00496402994097767

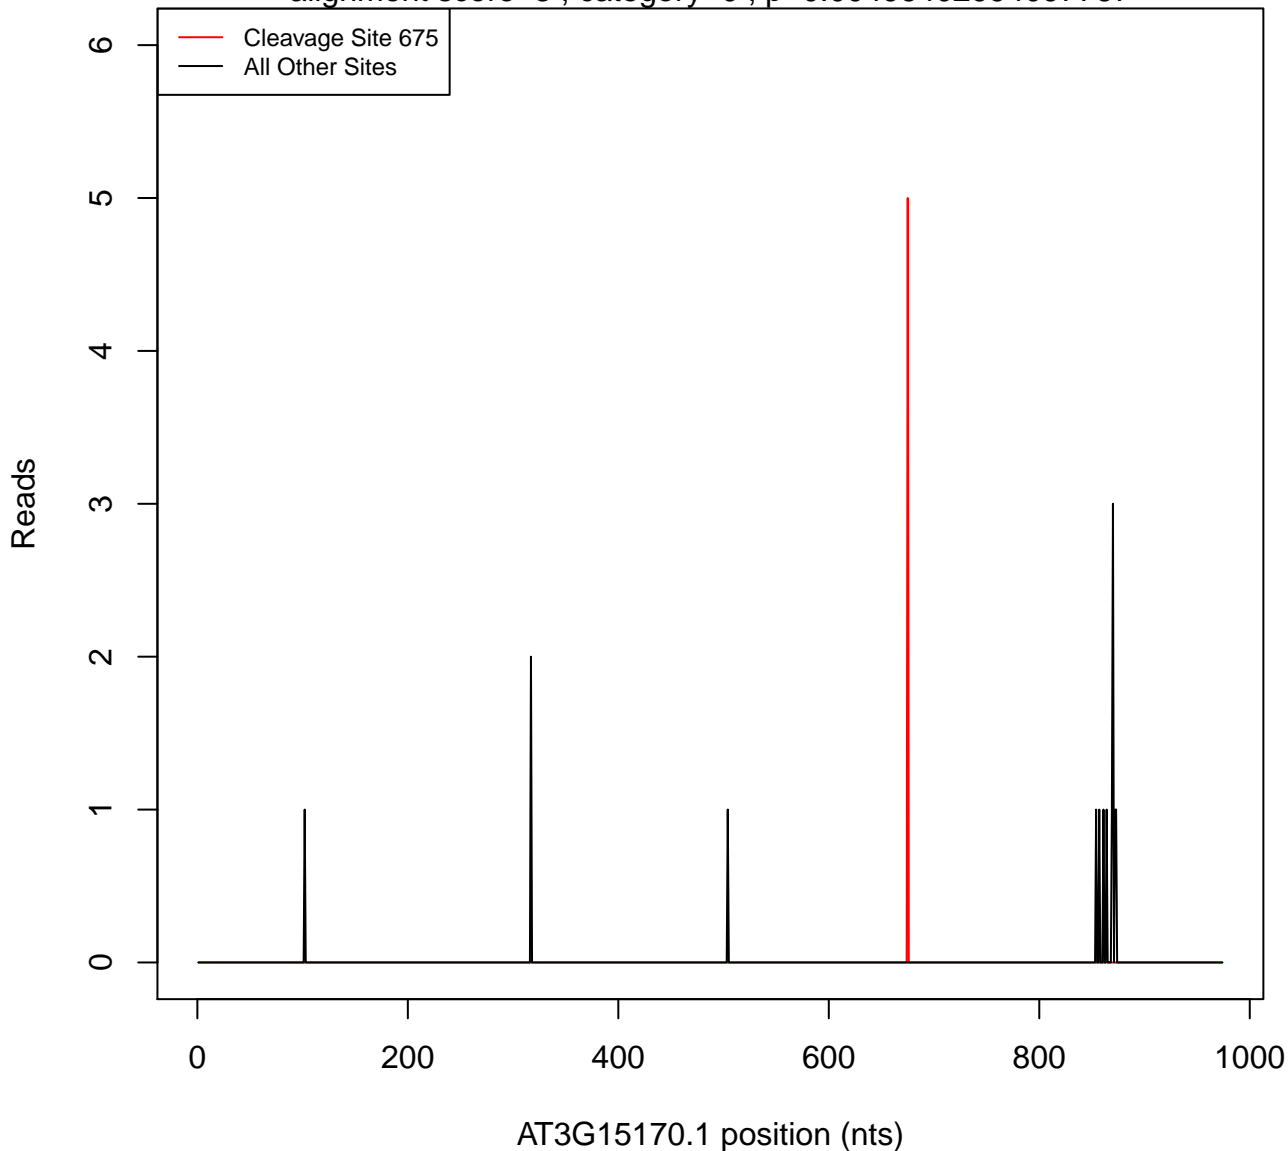

# ath-miR164b slicing AT3G15170.1 at nt 675

alignment score=3 , category=0 , p=0.00496402994097767

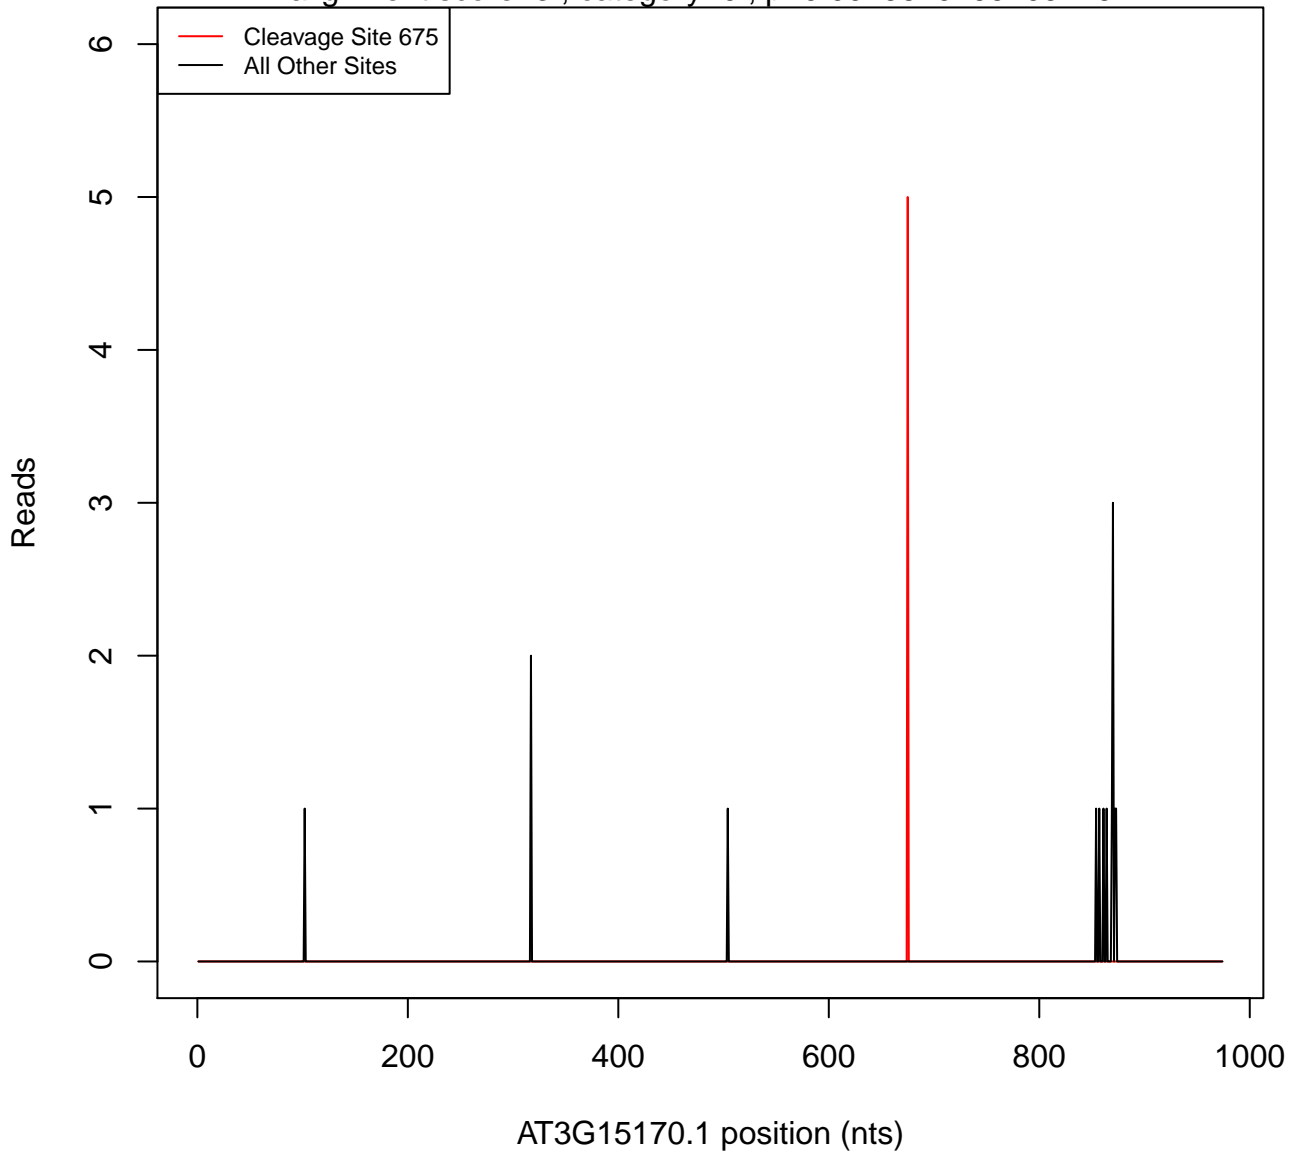

# ath-miR164c slicing AT3G15170.1 at nt 675

alignment score=3 , category=0 , p=0.00496402994097767

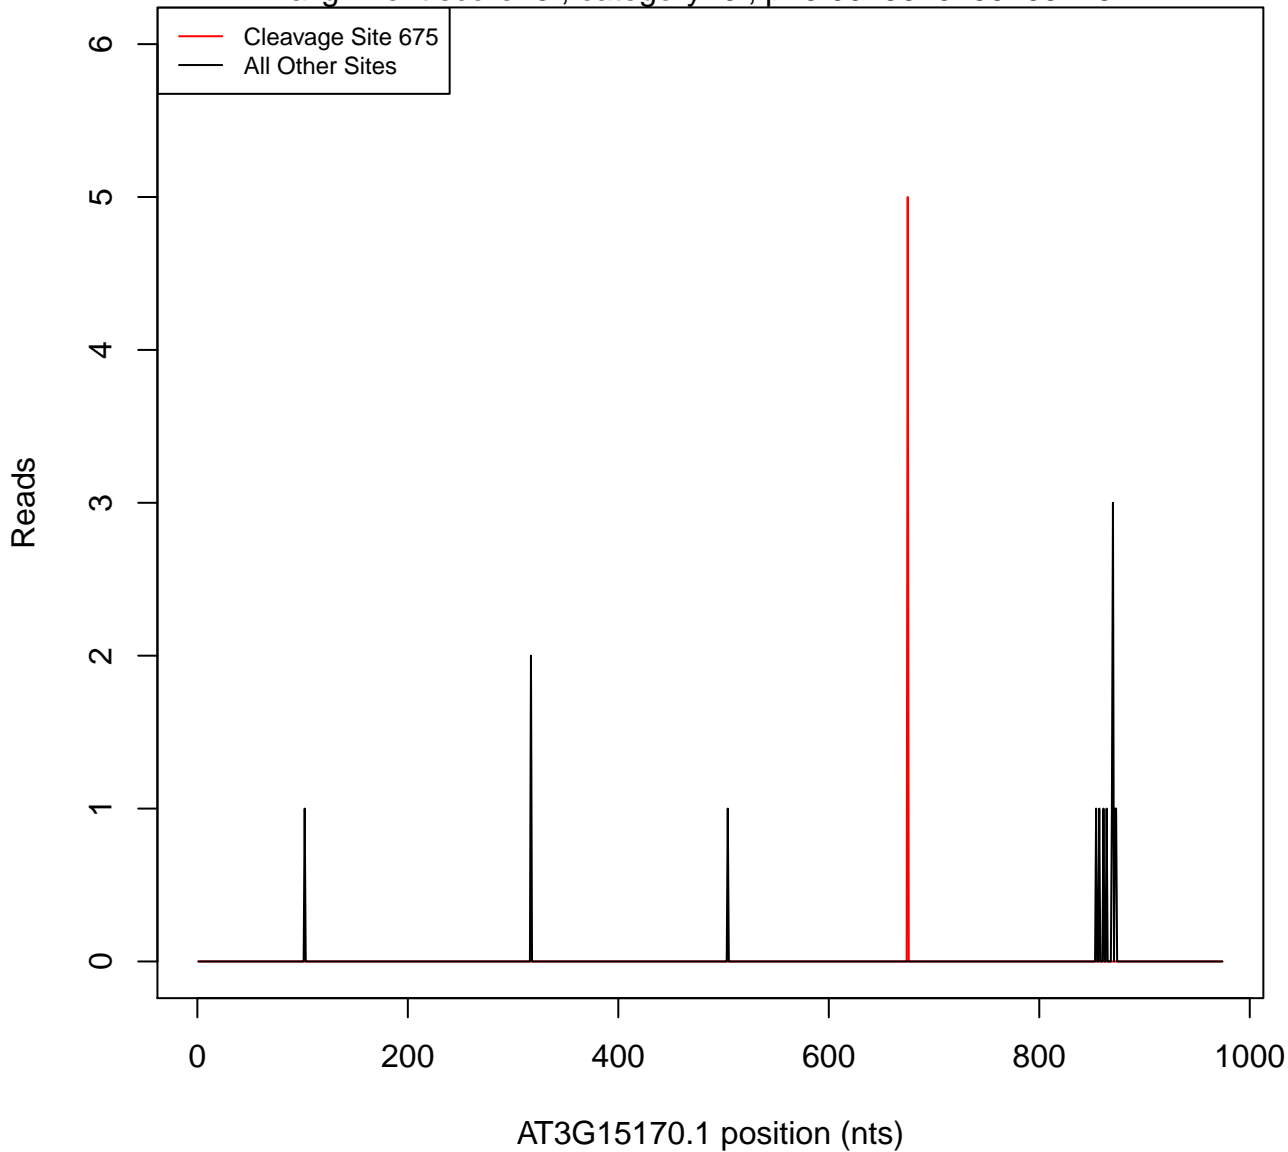

# ath-miR156a slicing AT3G15270.1 at nt 655

alignment score=3 , category=0 , p=0.0148182873647748

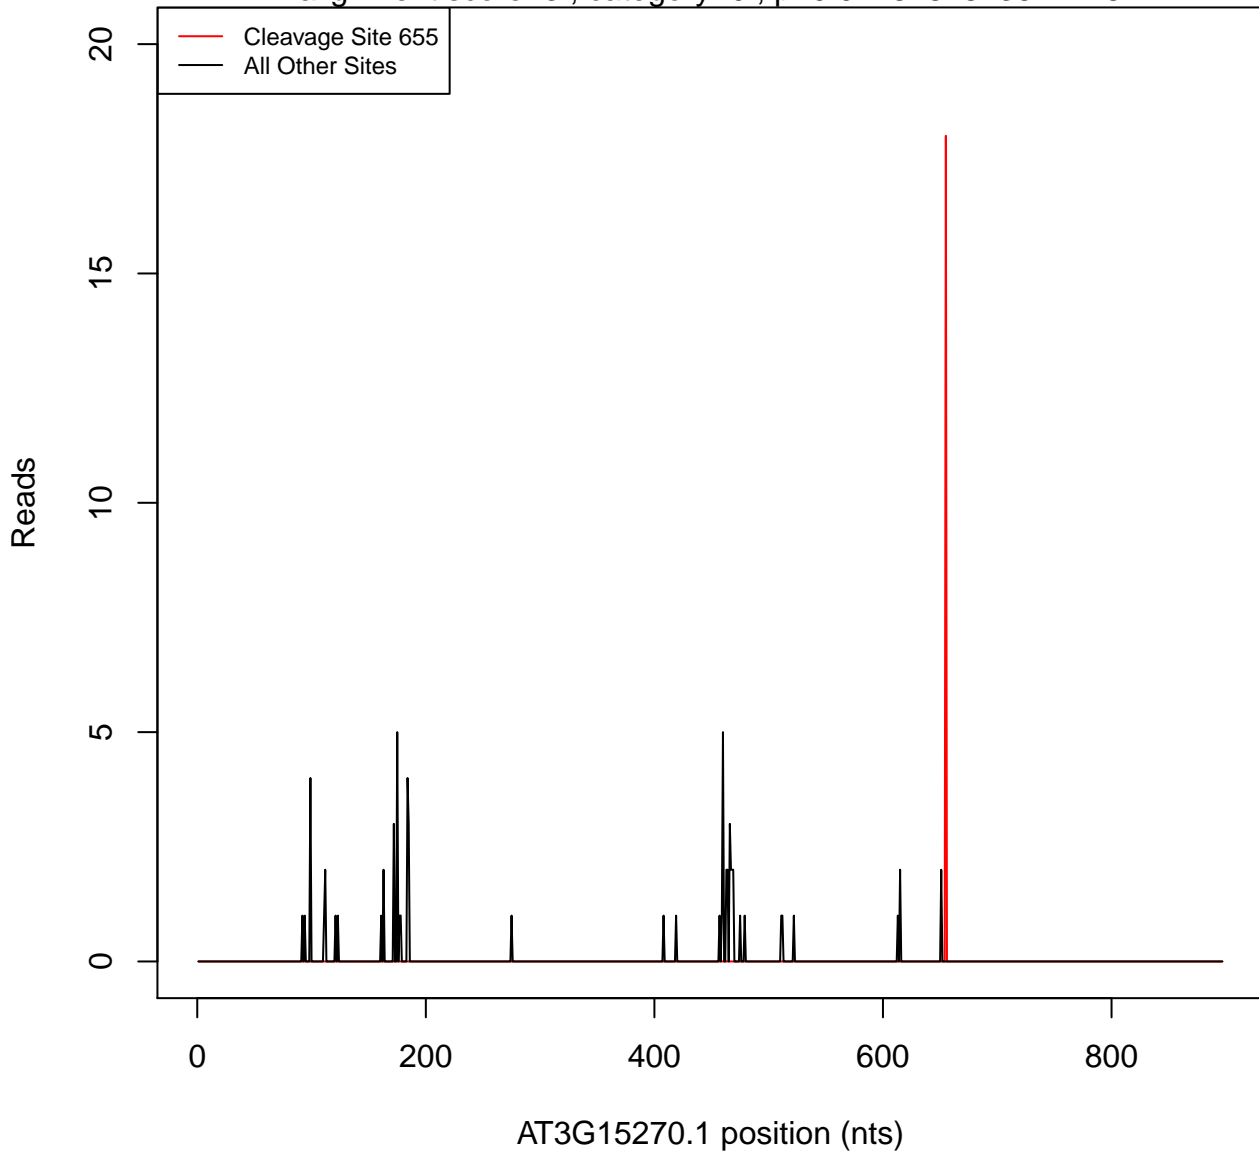

# ath-miR156b slicing AT3G15270.1 at nt 655

alignment score=3 , category=0 , p=0.0148182873647748

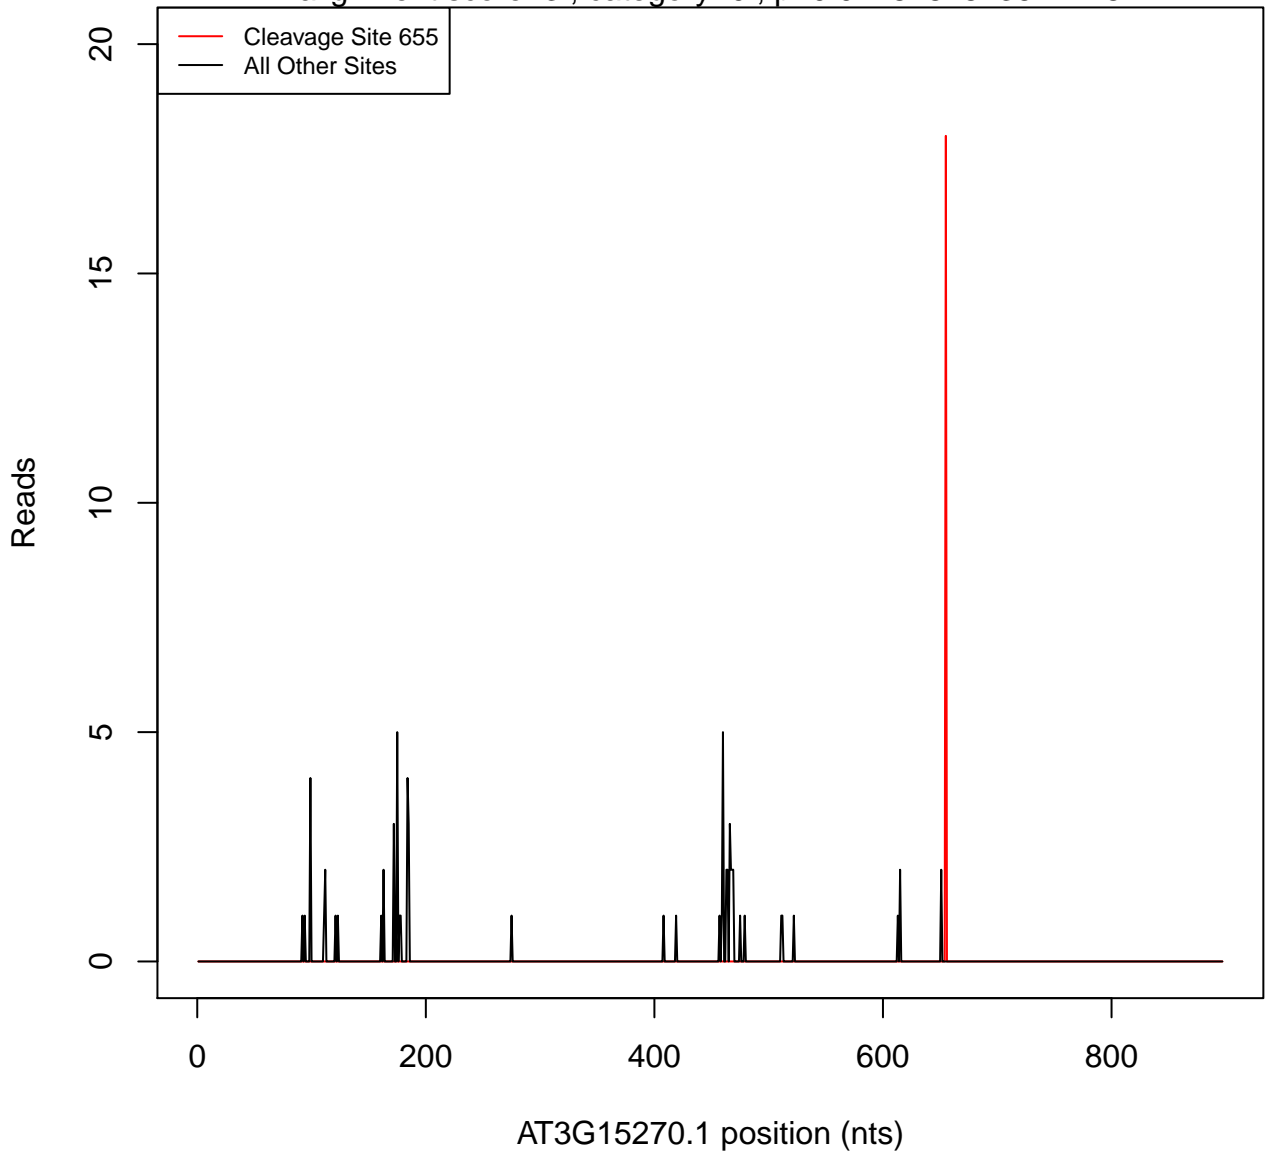

# ath-miR156c slicing AT3G15270.1 at nt 655

alignment score=3 , category=0 , p=0.0148182873647748



# ath-miR156d slicing AT3G15270.1 at nt 655

alignment score=3 , category=0 , p=0.0148182873647748

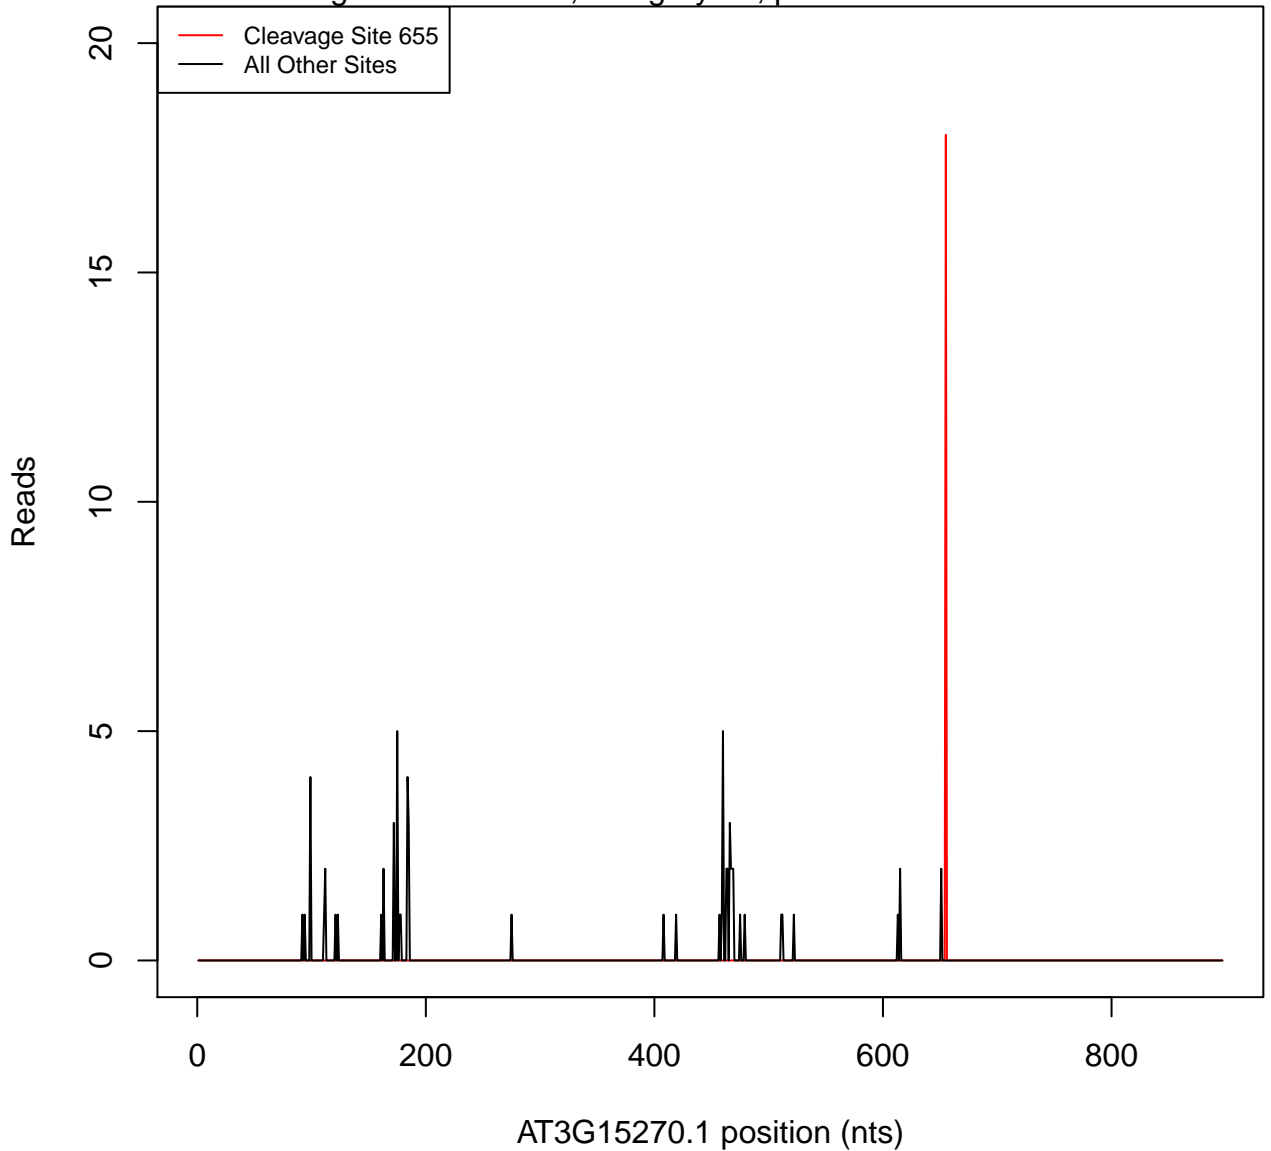



# ath-miR156e slicing AT3G15270.1 at nt 655

alignment score=3 , category=0 , p=0.0148182873647748

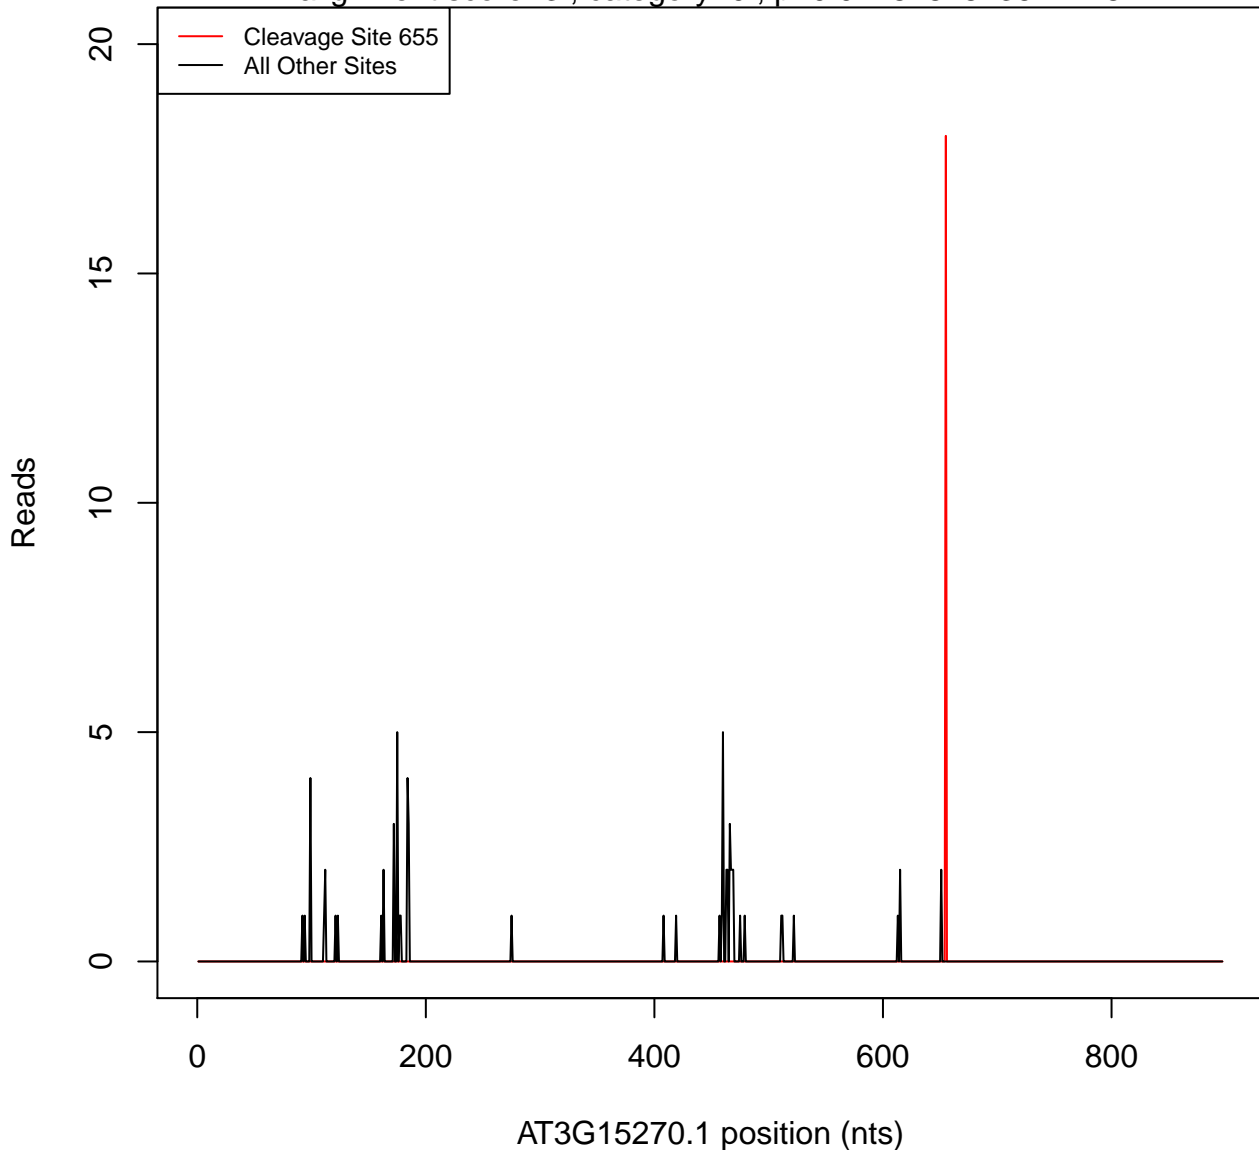

# ath-miR156f slicing AT3G15270.1 at nt 655

alignment score=3 , category=0 , p=0.0148182873647748



# ath-miR156g slicing AT3G15270.1 at nt 655

alignment score=4 , category=0 , p=0.0229555788632927

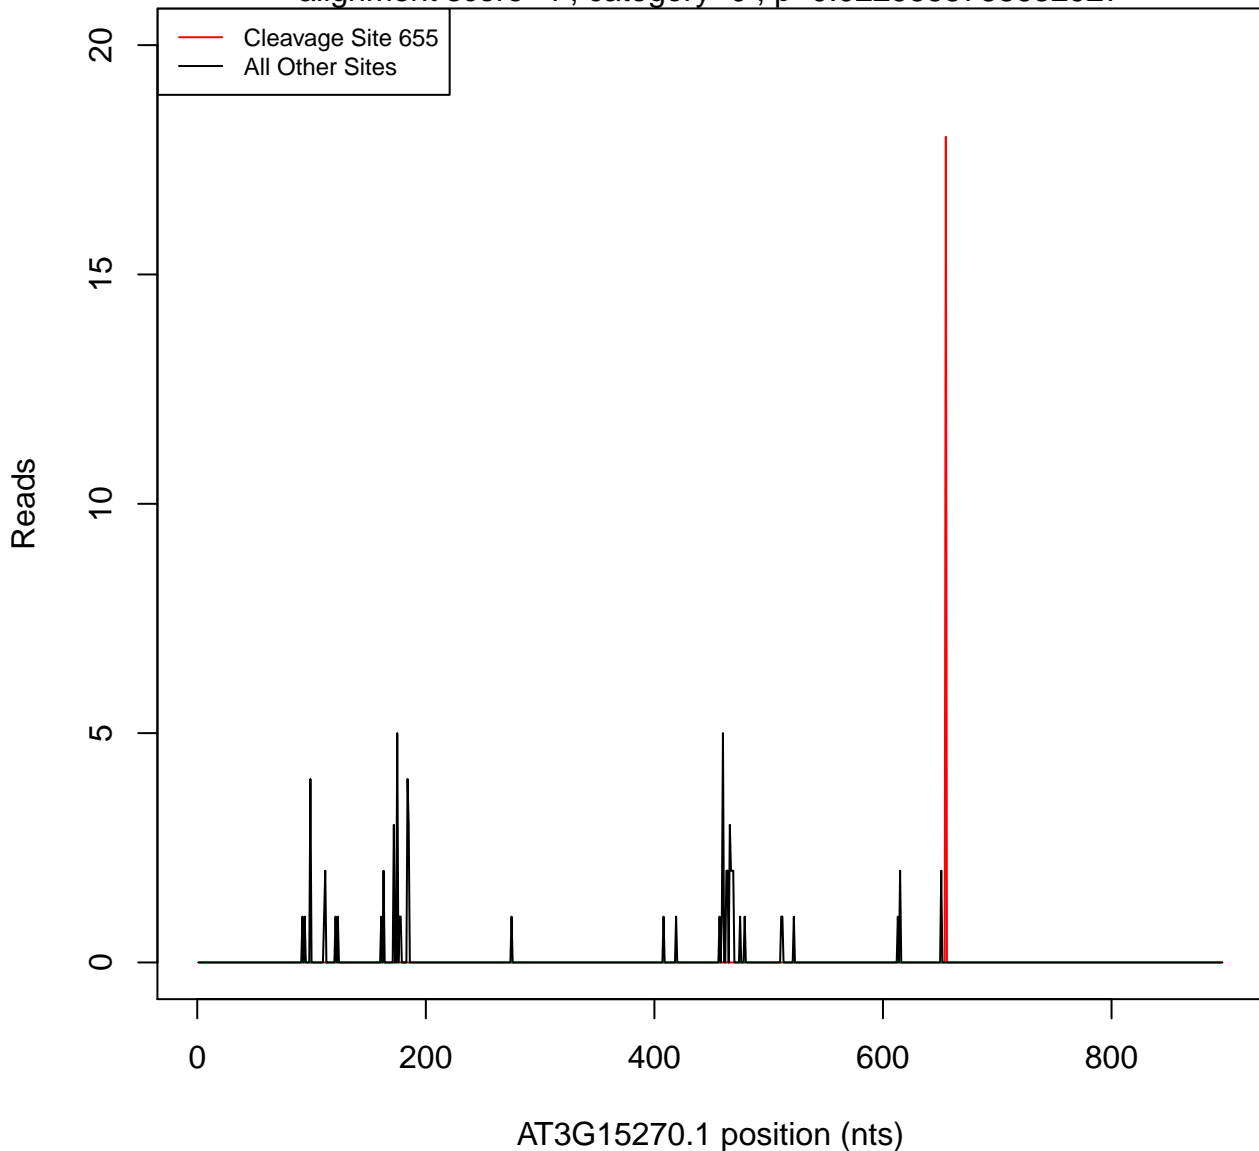

# ath-miR156h slicing AT3G15270.1 at nt 655

alignment score=4 , category=0 , p=0.0654911855516217

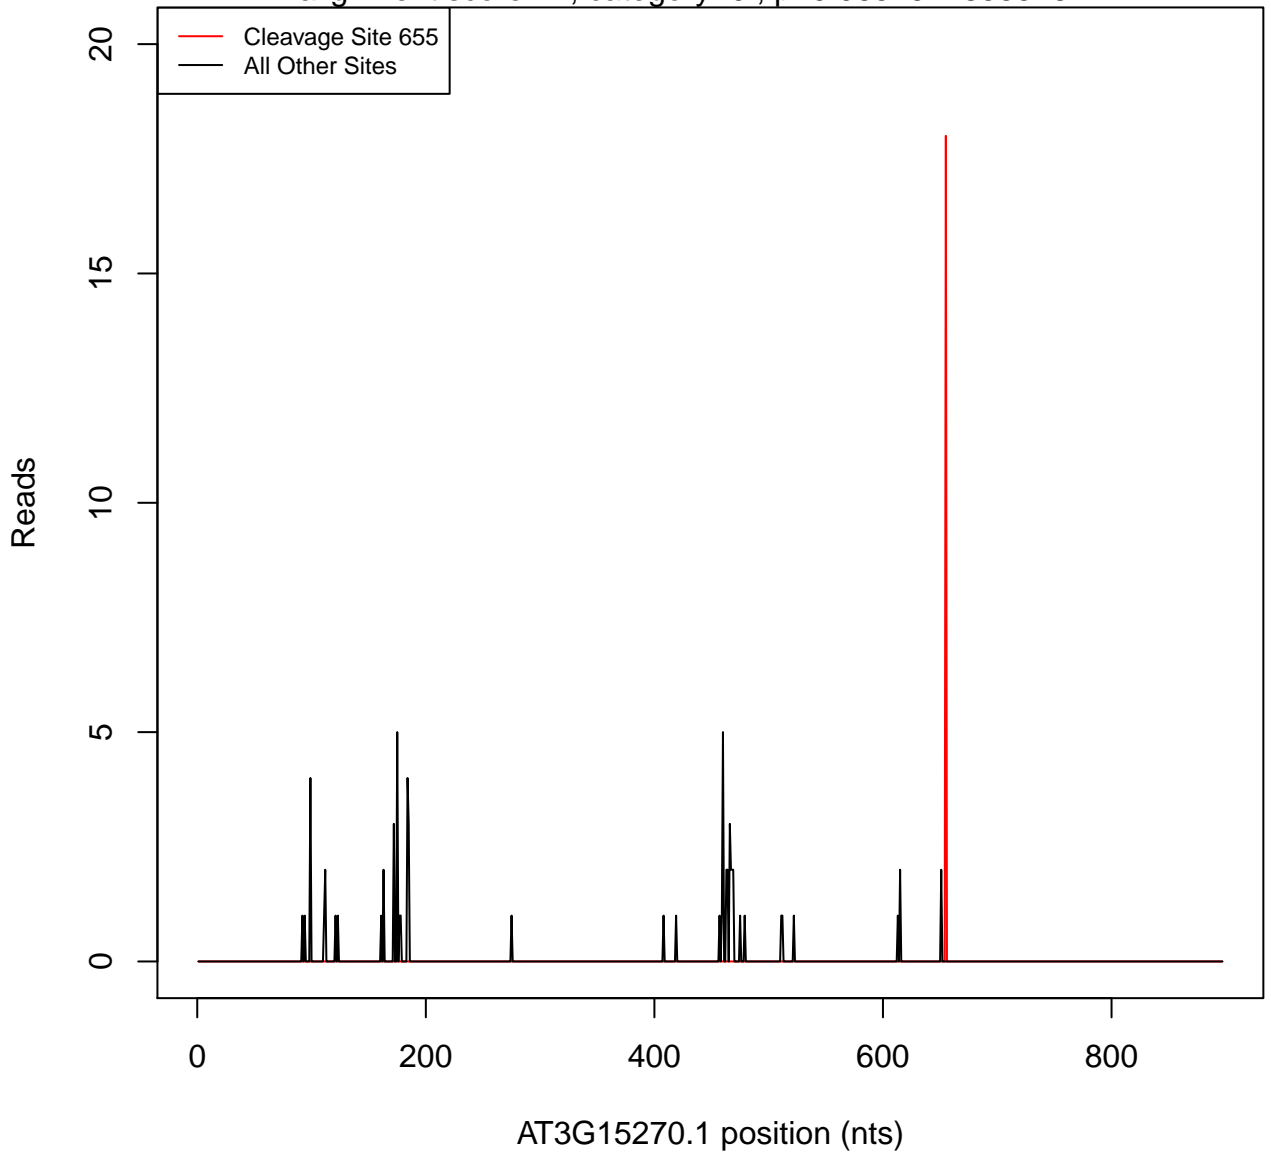

# ath-miR156i slicing AT3G15270.1 at nt 655

alignment score=1 , category=0 , p=0.0626448986382654

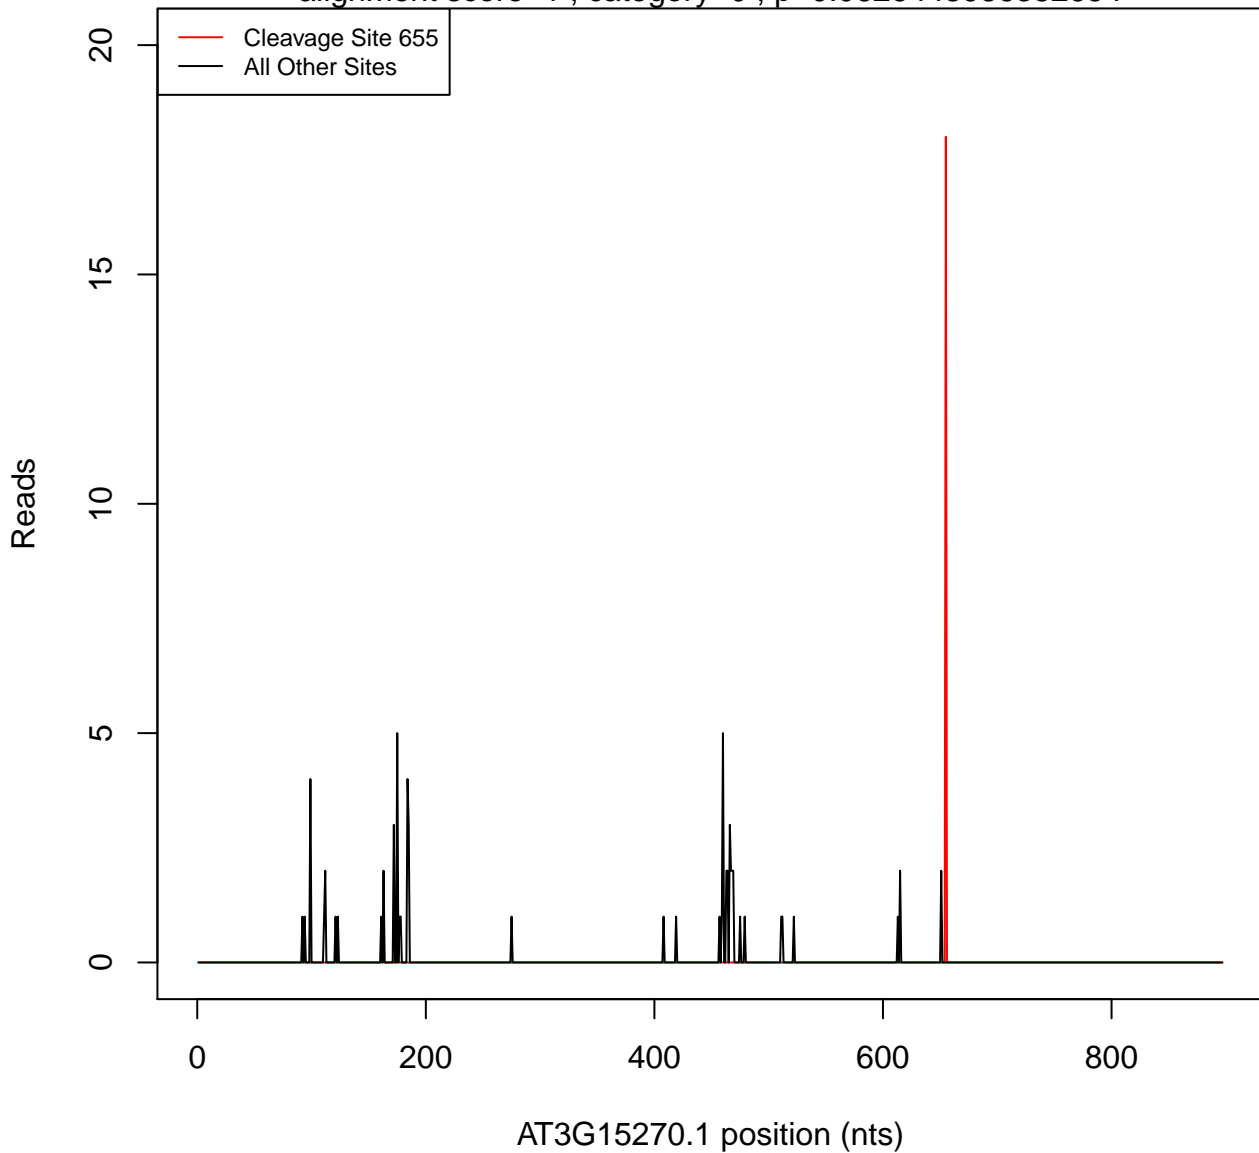

# ath-miR156j slicing AT3G15270.1 at nt 655

alignment score=2 , category=0 , p=0.00303650869261962

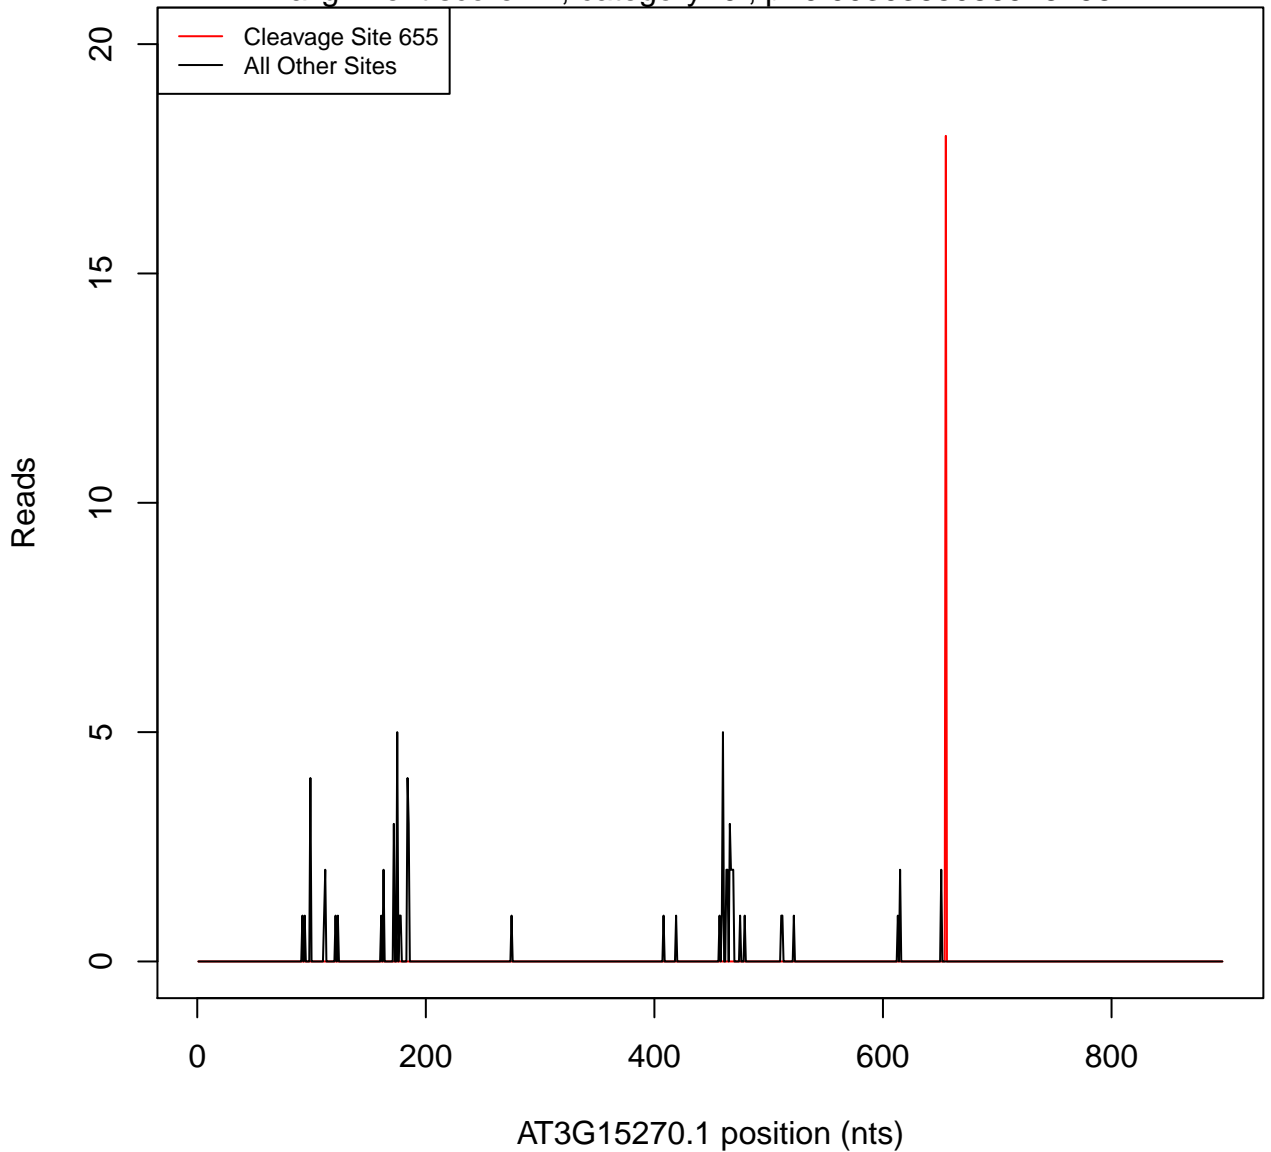

# ath-miR157d slicing AT3G15270.1 at nt 655

alignment score=4 , category=0 , p=0.0453841991256364

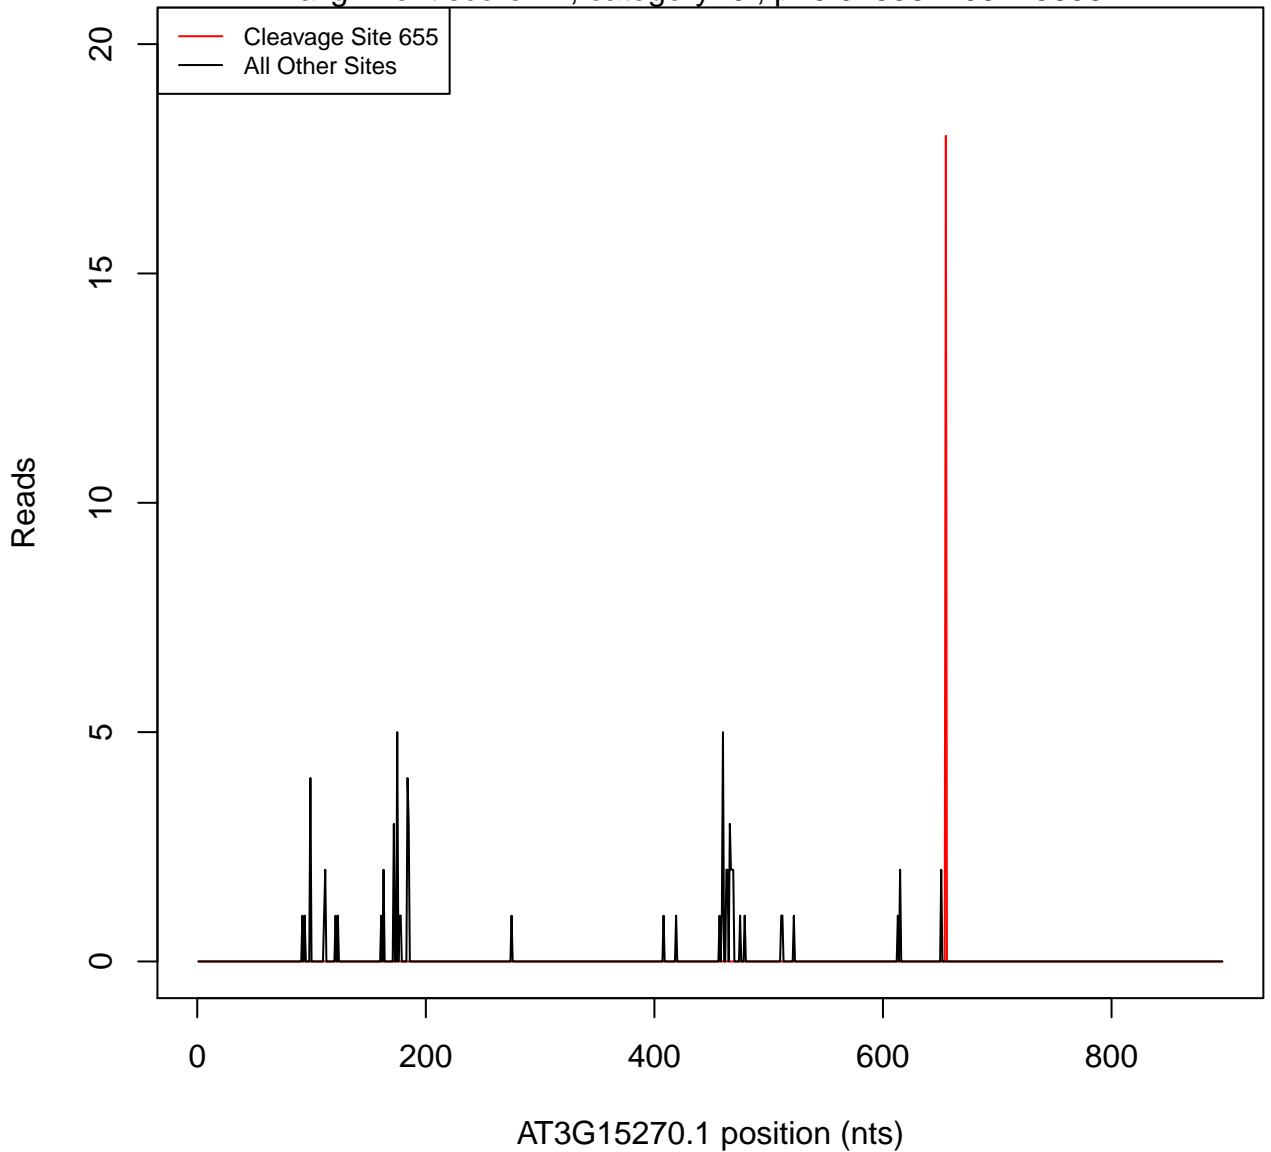

# ath-miR169a slicing AT3G20910.1 at nt 1046

alignment score=4 , category=0 , p=0.0210629097146398

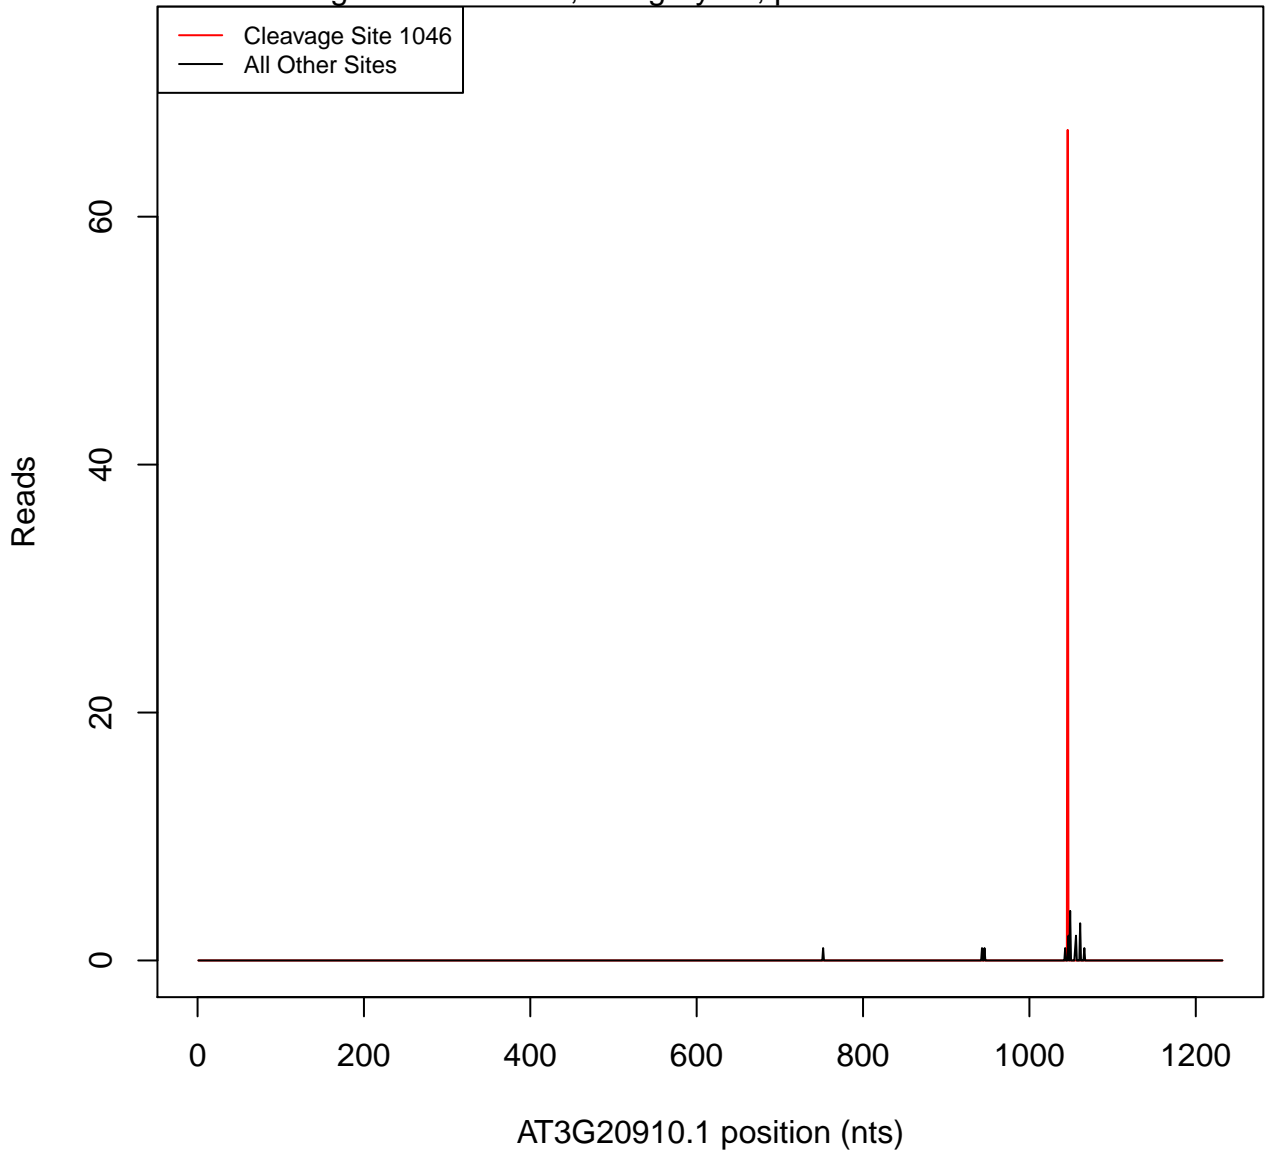



# ath-miR169b slicing AT3G20910.1 at nt 1046

alignment score=4 , category=0 , p=0.01726656523533

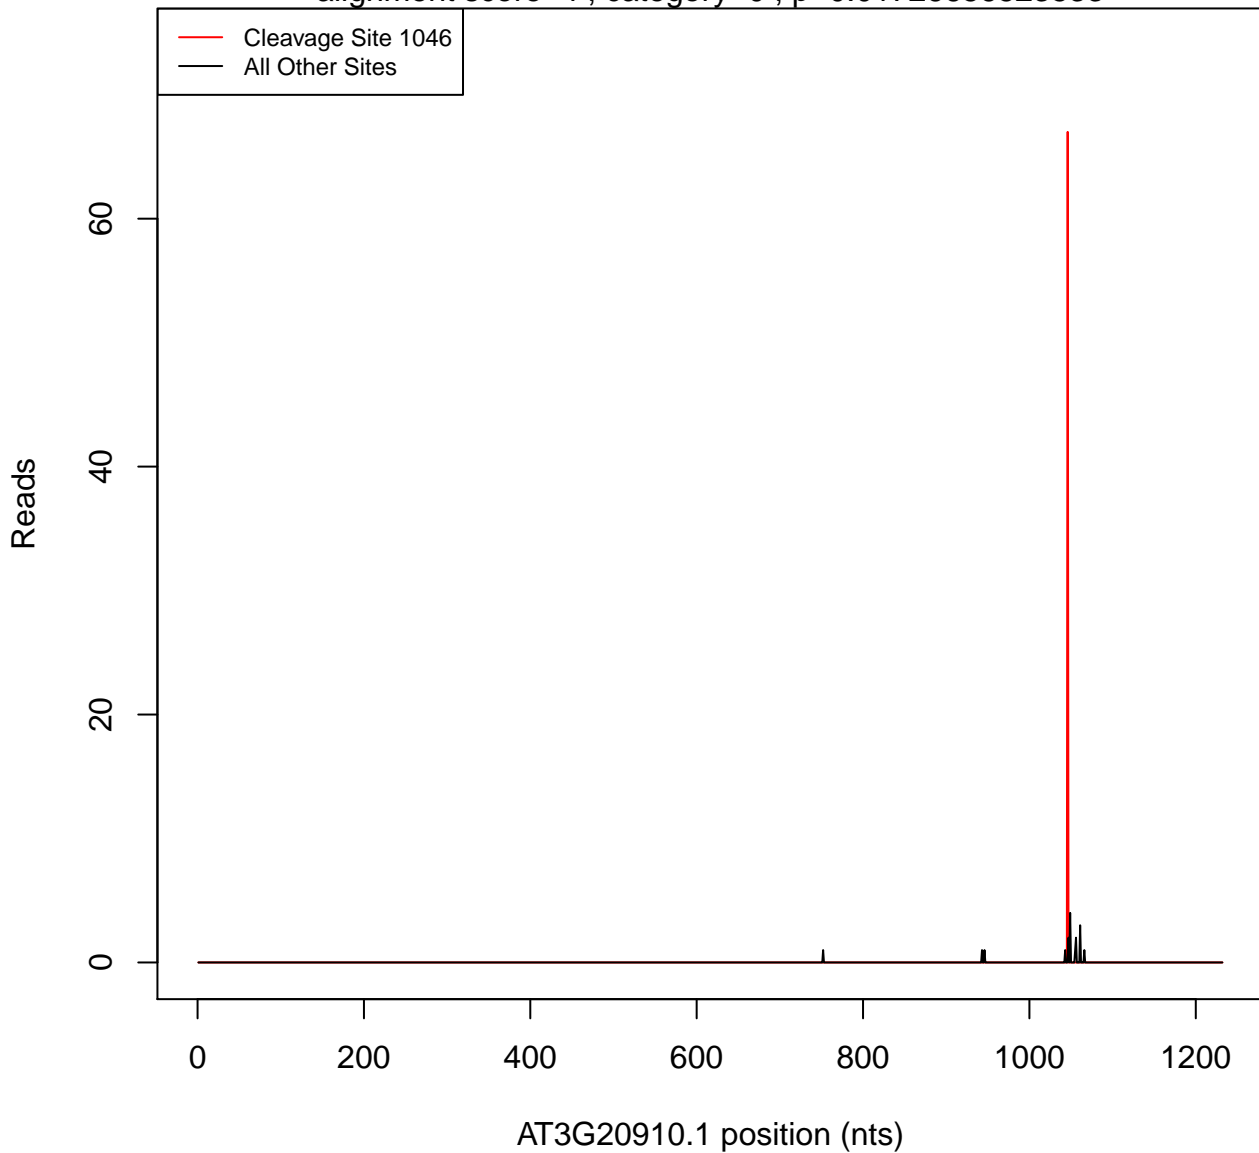

# ath-miR169c slicing AT3G20910.1 at nt 1046

alignment score=4 , category=0 , p=0.01726656523533

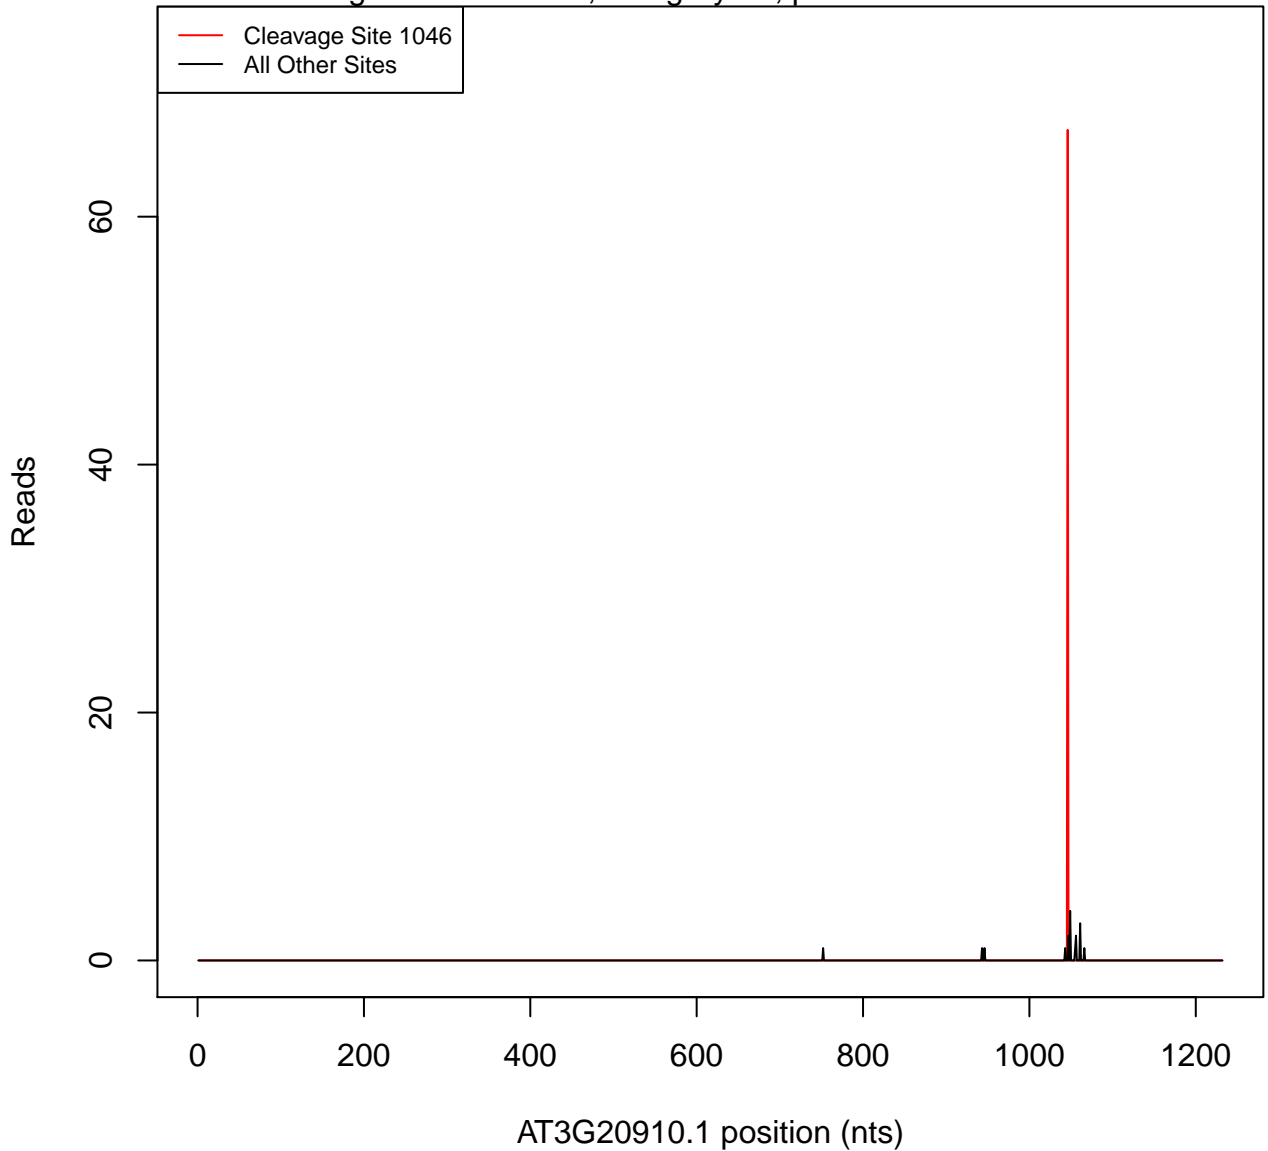

# vvi-miR3630\*\_L-2 slicing AT3G22050.1 at nt 682

alignment score=2.5 , category=4 , p=0.0597058822131087

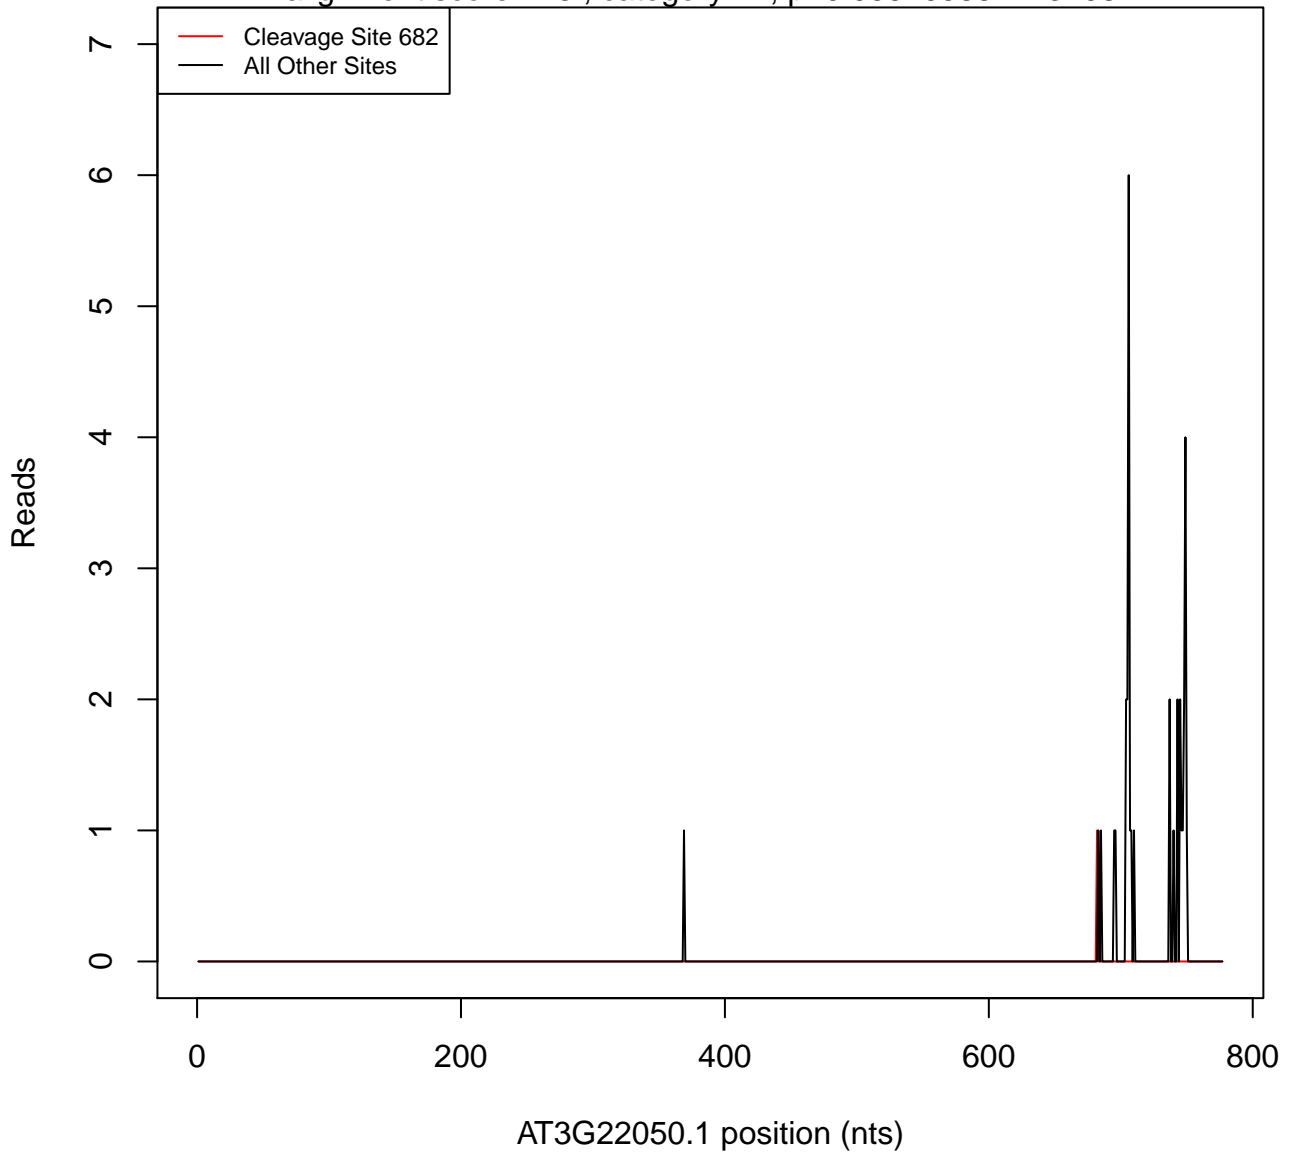

# PC-5p-12 slicing AT3G25100.1 at nt 823

alignment score=2.5 , category=3 , p=0.0409703662946055

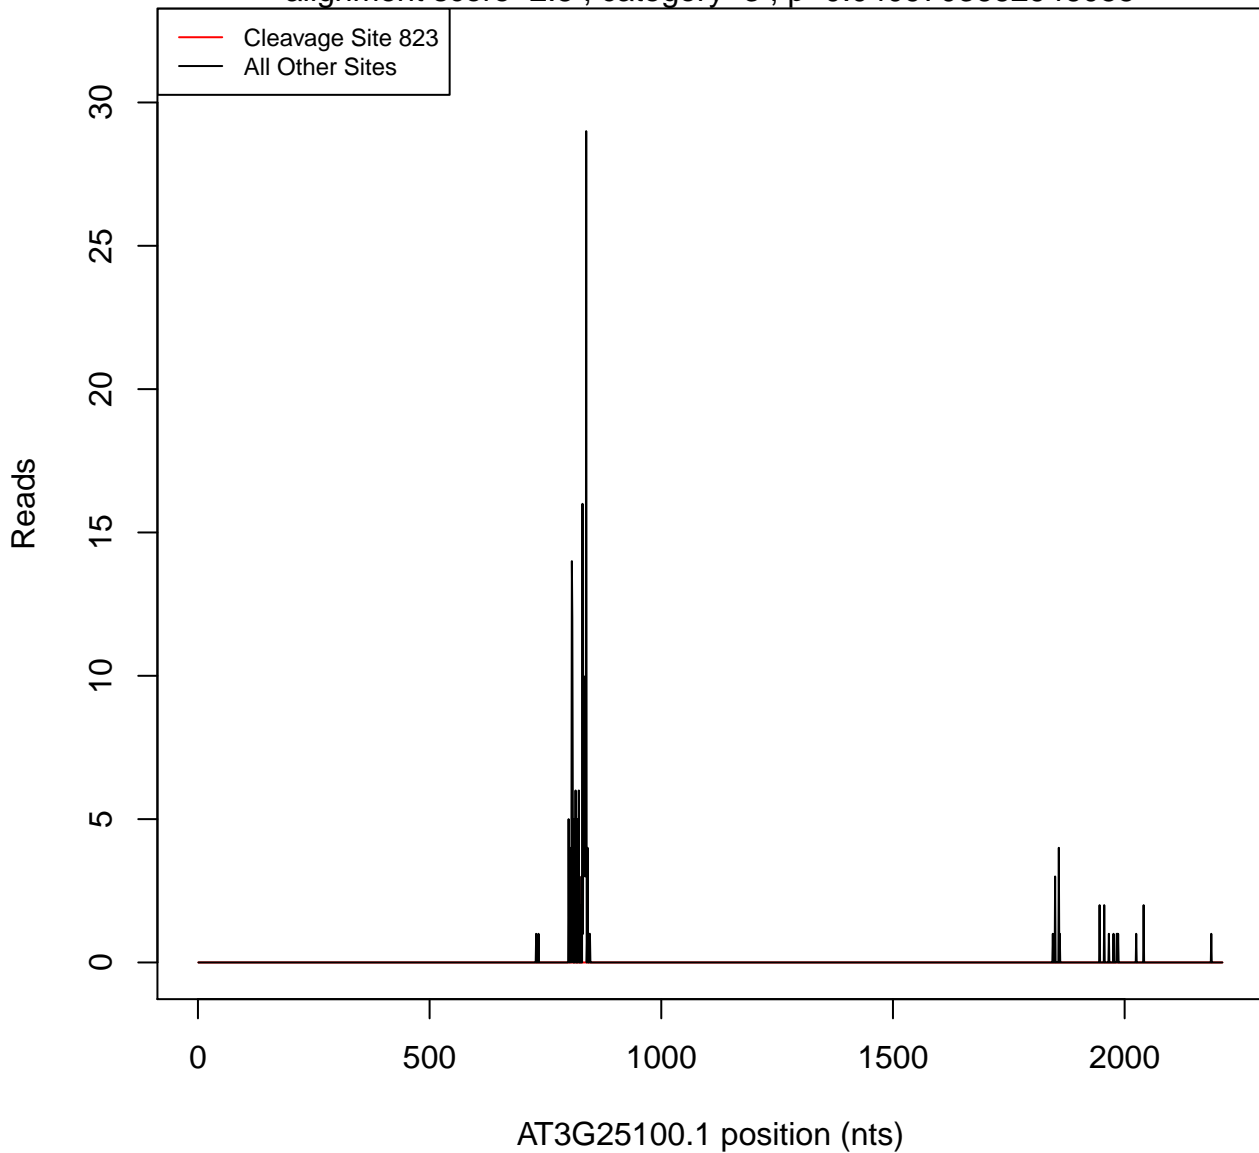

# ath-miR828 slicing AT3G25795.1 at nt 888

alignment score=1 , category=0 , p=0.00358760974080163

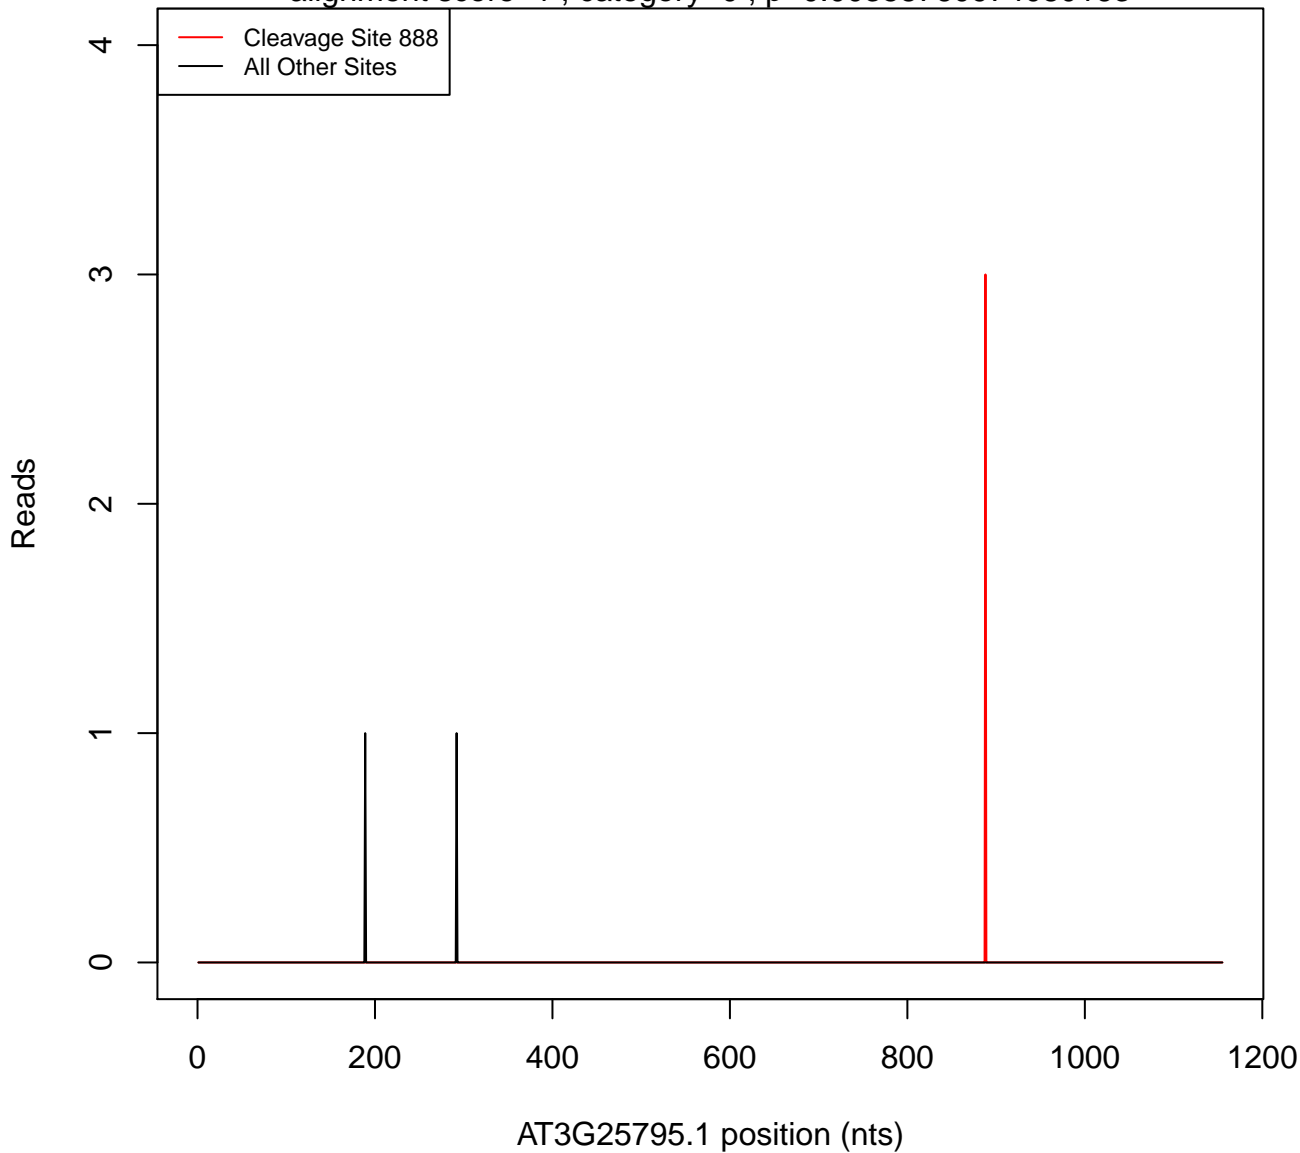

# ath-miR393a slicing AT3G26810.1 at nt 2010

alignment score=2 , category=0 , p=0.0120908243663383

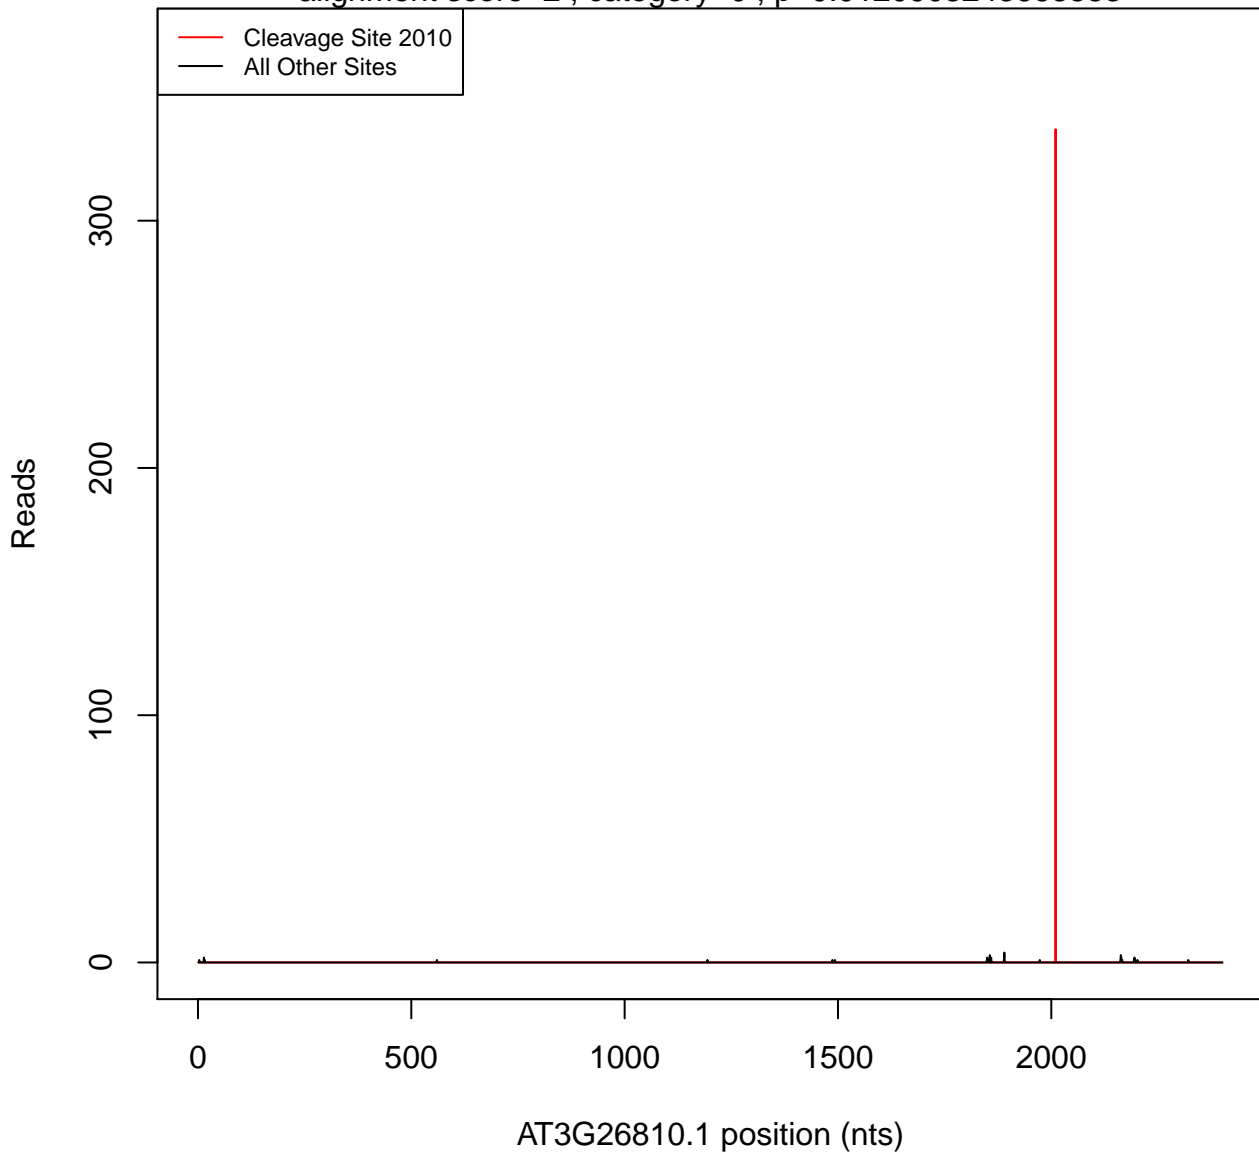

# ath-miR393b slicing AT3G26810.1 at nt 2010

alignment score=2 , category=0 , p=0.0120908243663383



# ath-miR858b slicing AT3G49690.1 at nt 509

alignment score=3.5 , category=3 , p=0.0584614229377826

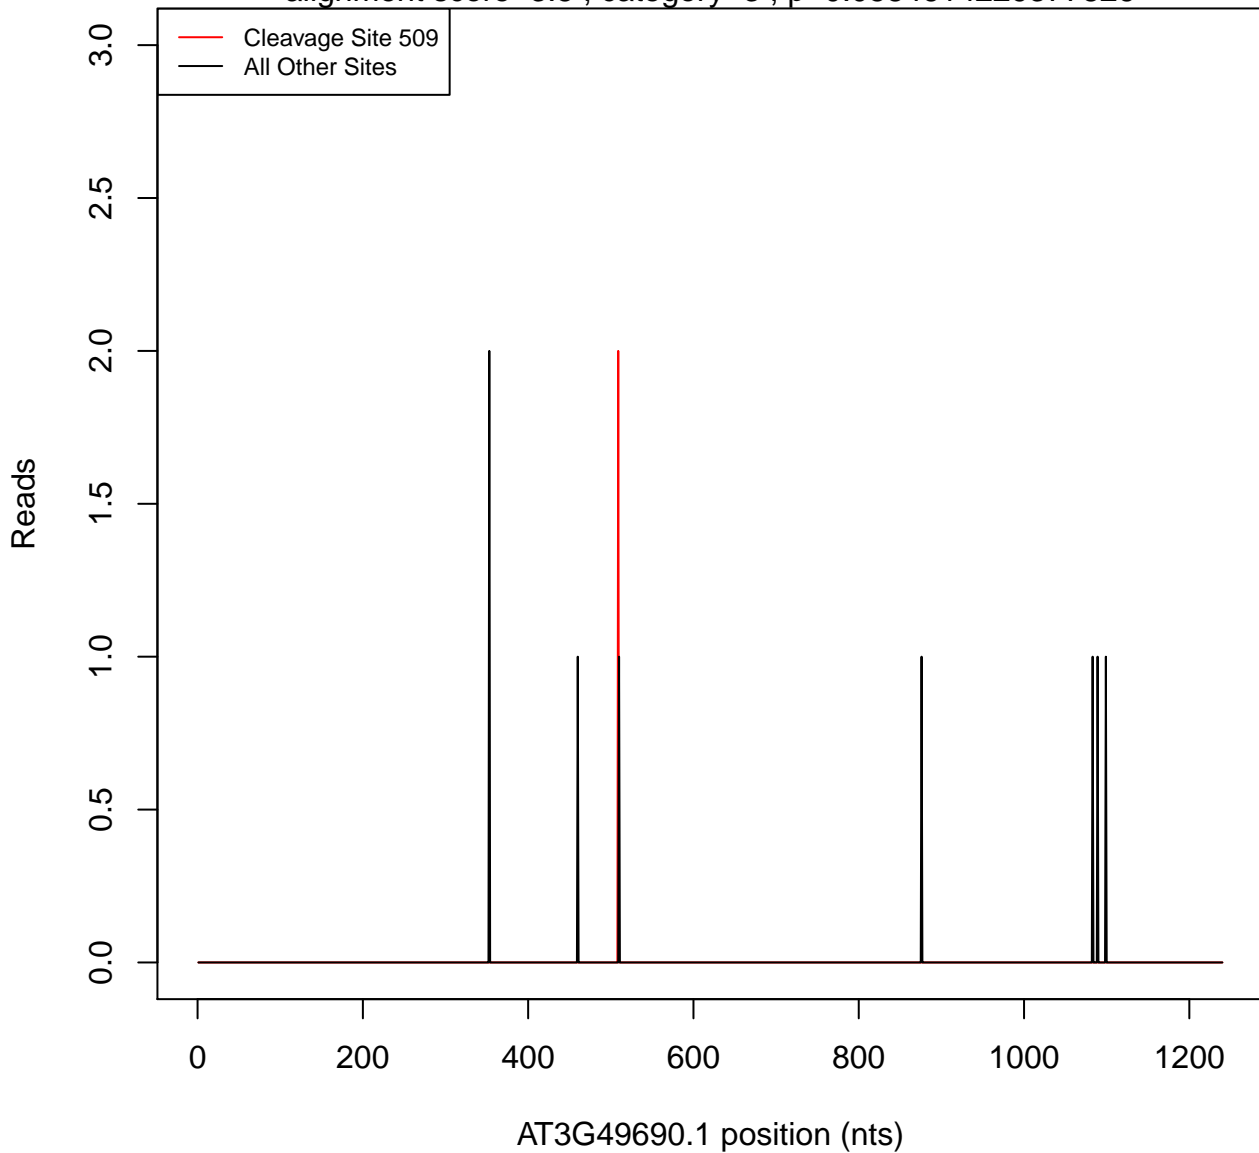



# ath-miR170\_1ss3AT slicing AT3G60630.1 at nt 1056

alignment score=3.5 , category=0 , p=0.0066132246252576

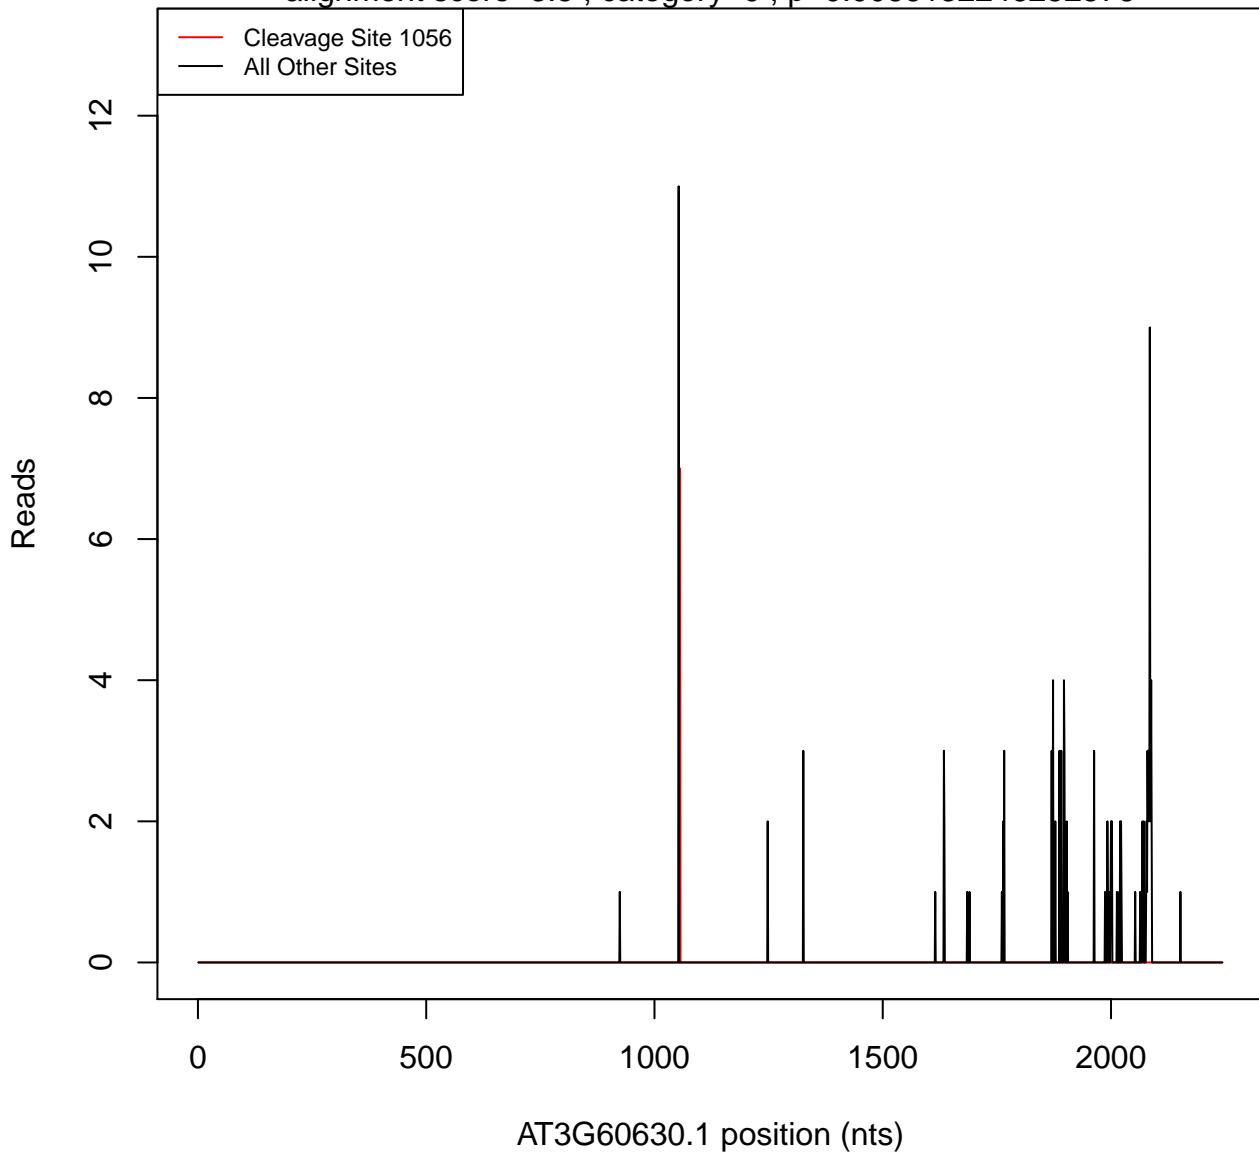

# ath-miR170 slicing AT3G60630.1 at nt 1056

alignment score=1.5 , category=0 , p=0.00990341828870034

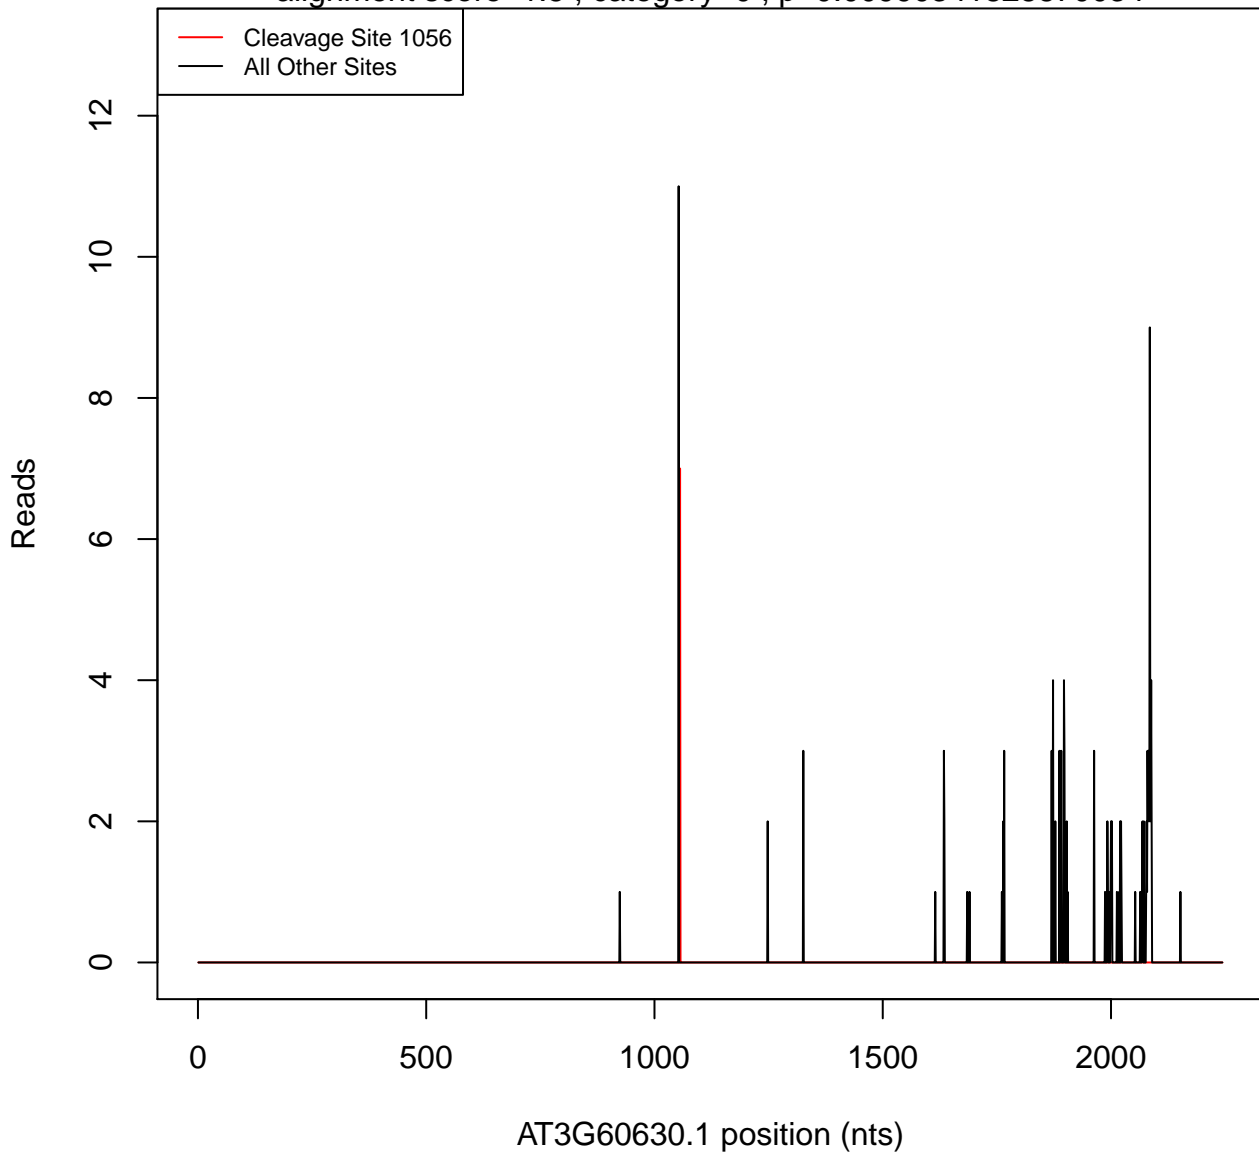

# ath-miR171a slicing AT3G60630.1 at nt 1056

alignment score=0 , category=0 , p=0.0123639101143476

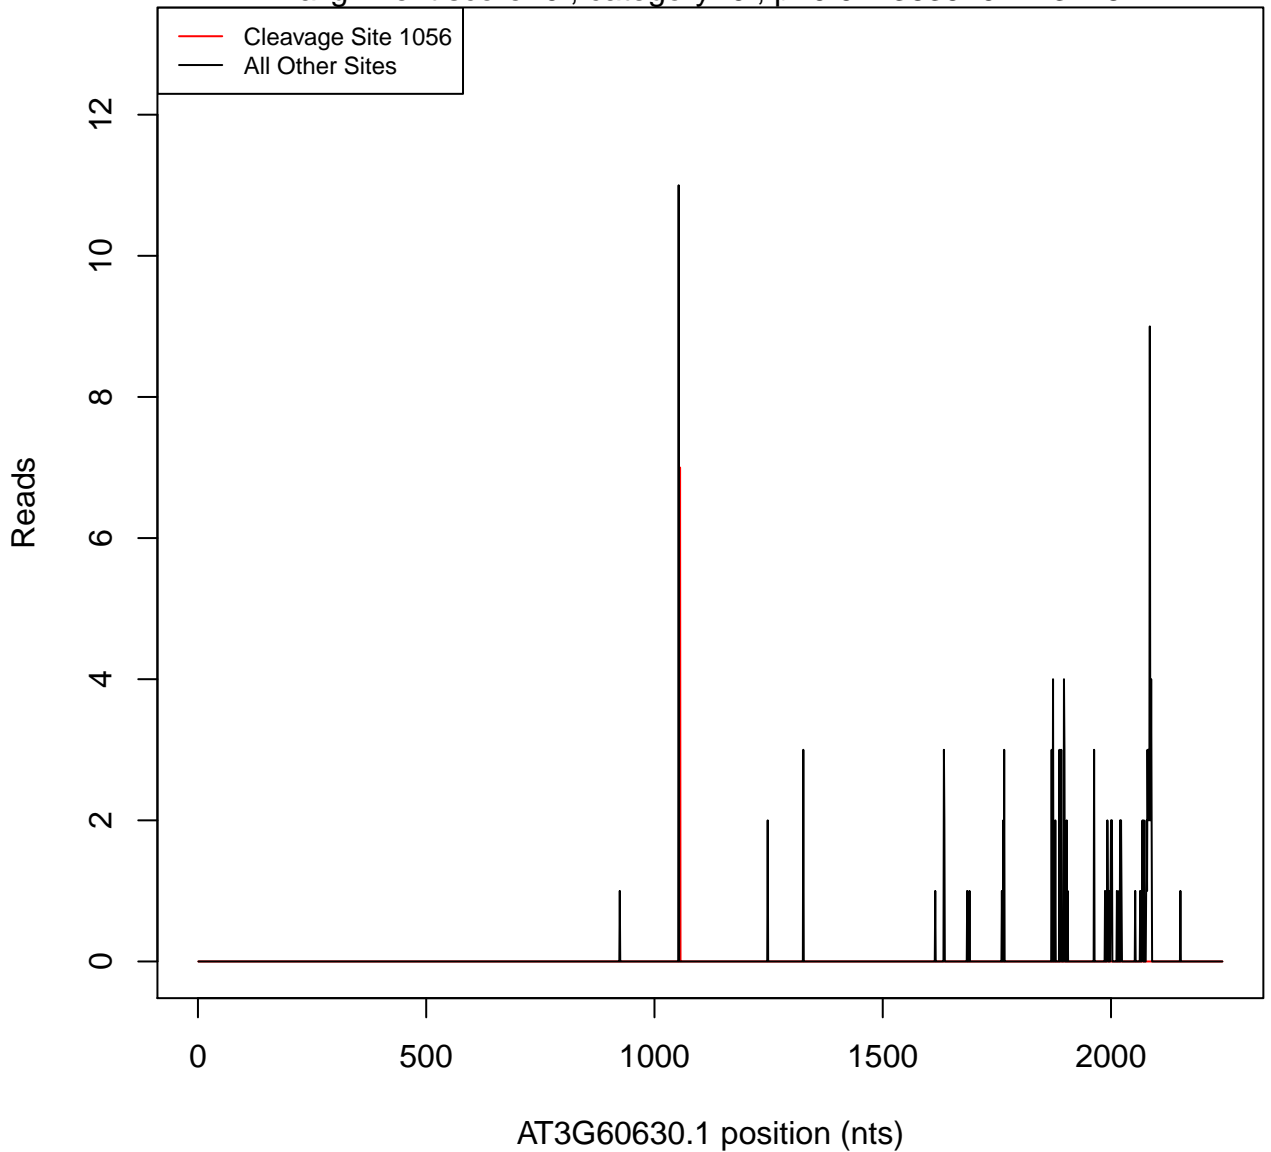

# ath-miR858b slicing AT3G62610.1 at nt 300

alignment score=3.5 , category=3 , p=0.0584614229377826

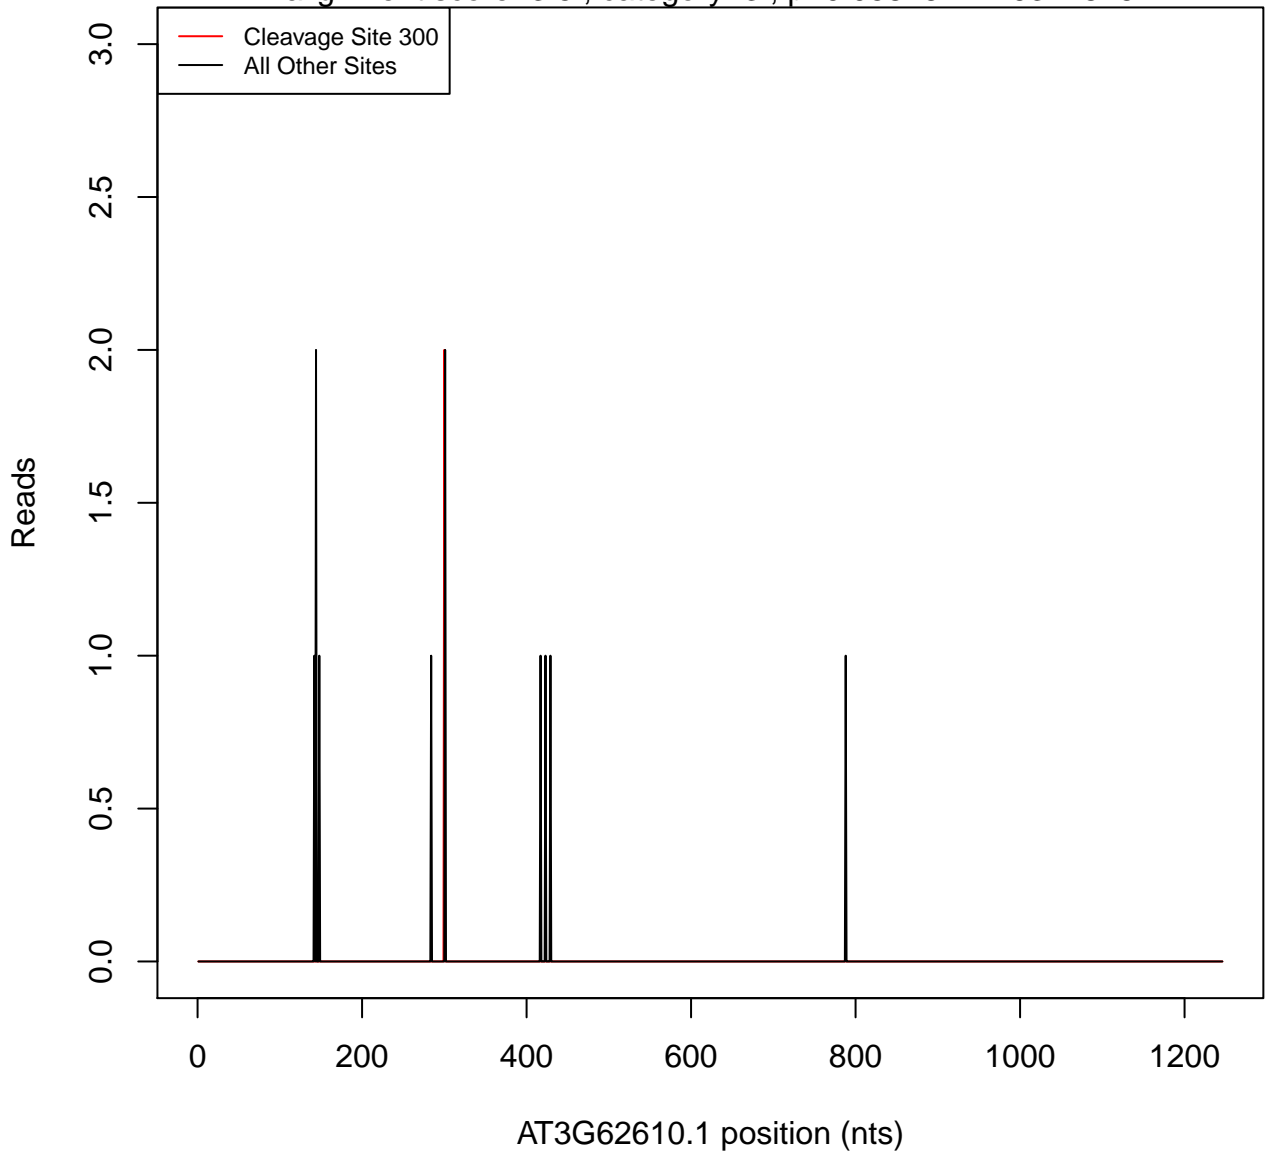

# ath-miR858 slicing AT3G62610.1 at nt 301

alignment score=3.5 , category=2 , p=0.0711648514103769

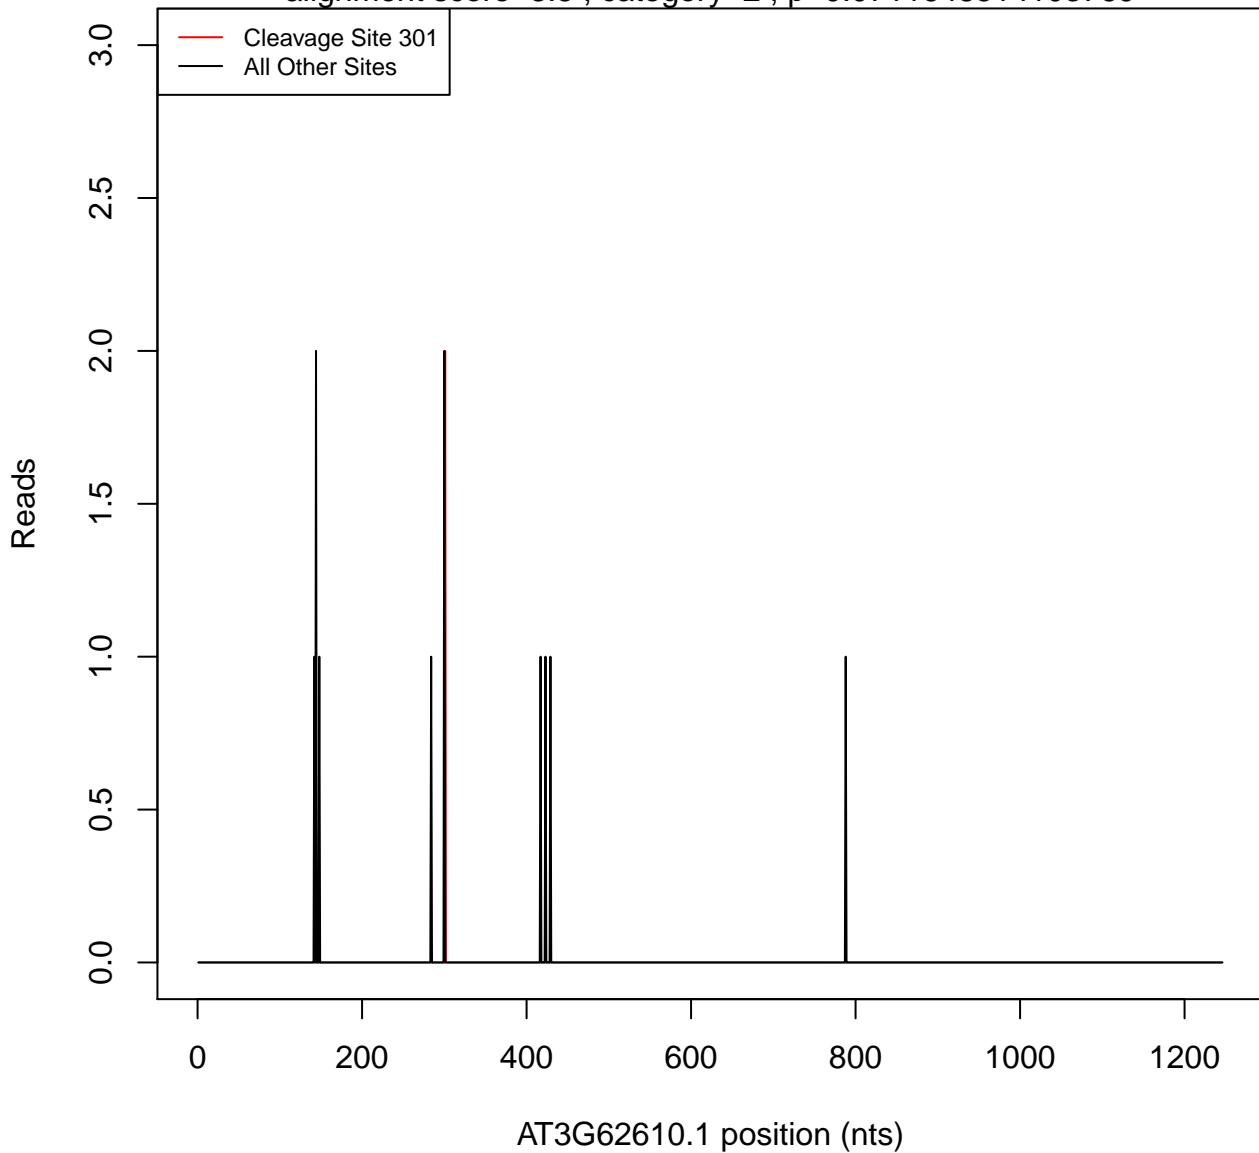

# ath-miR393a slicing AT4G03190.1 at nt 1598

alignment score=3.5 , category=0 , p=0.00220928555662447

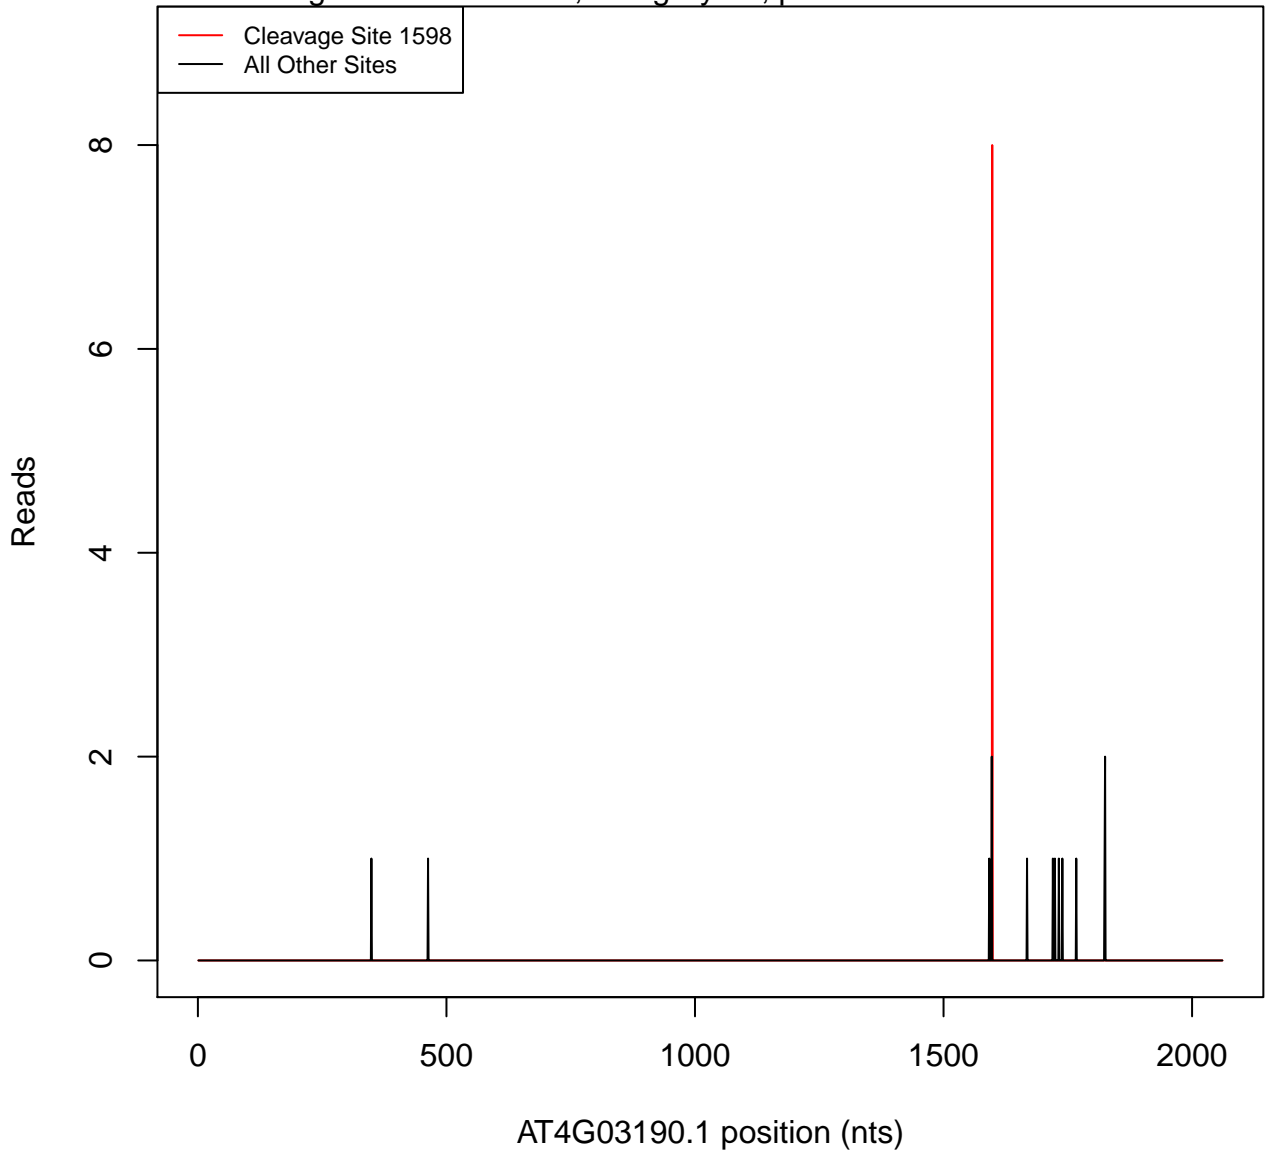

# ath-miR393b slicing AT4G03190.1 at nt 1598

alignment score=3.5 , category=0 , p=0.00220928555662447

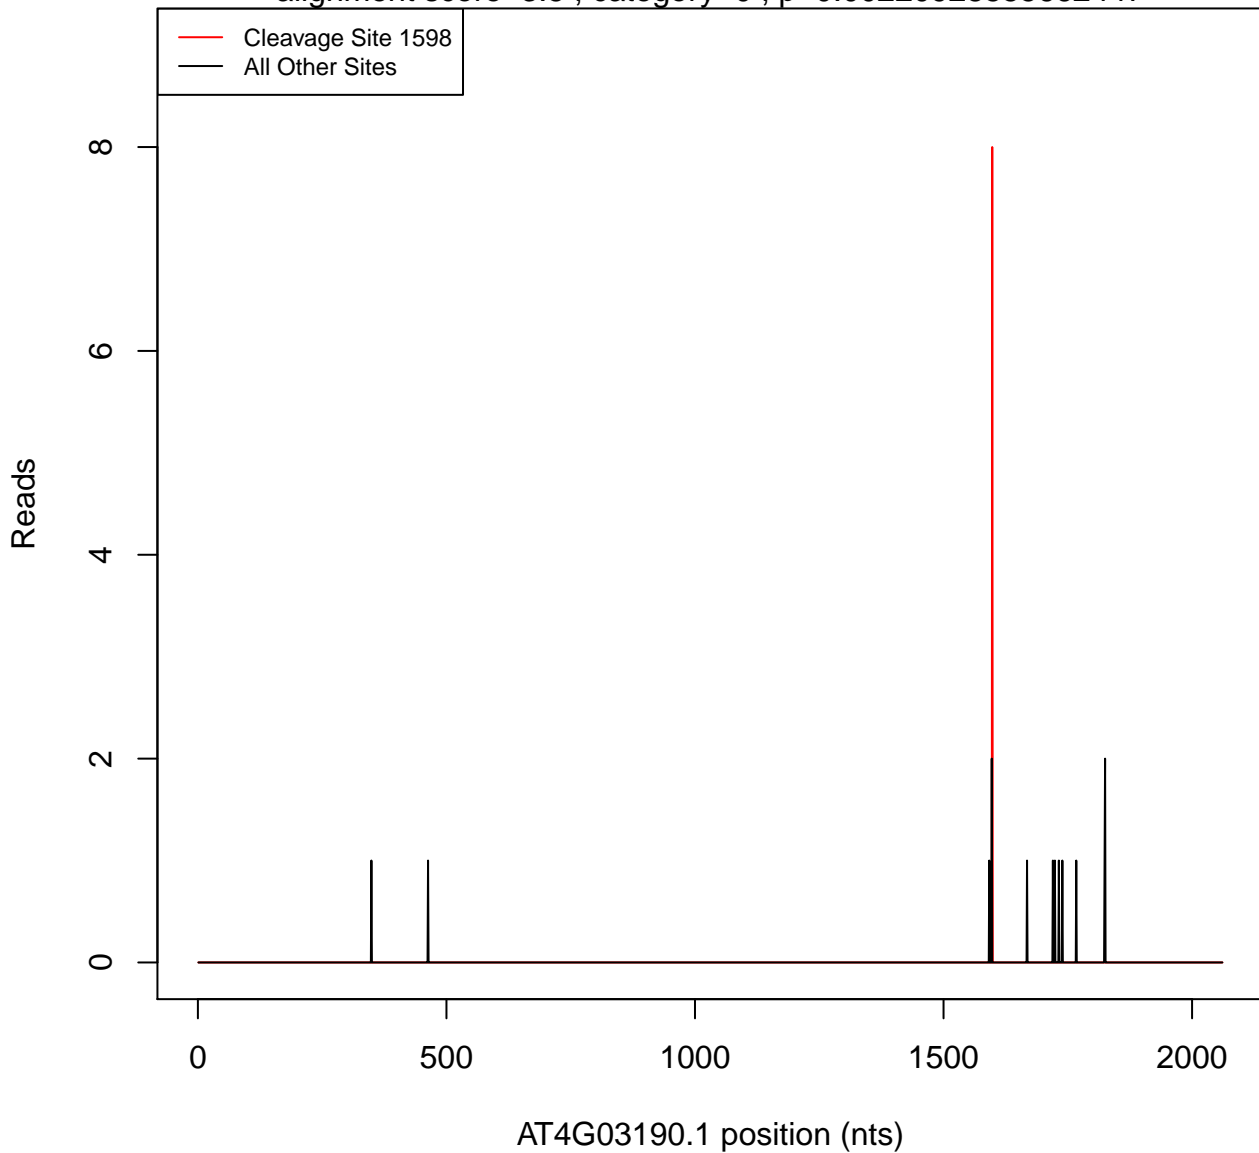

# ath-miR827 slicing AT4G10450.1 at nt 627

alignment score=4 , category=2 , p=0.0625538900545319

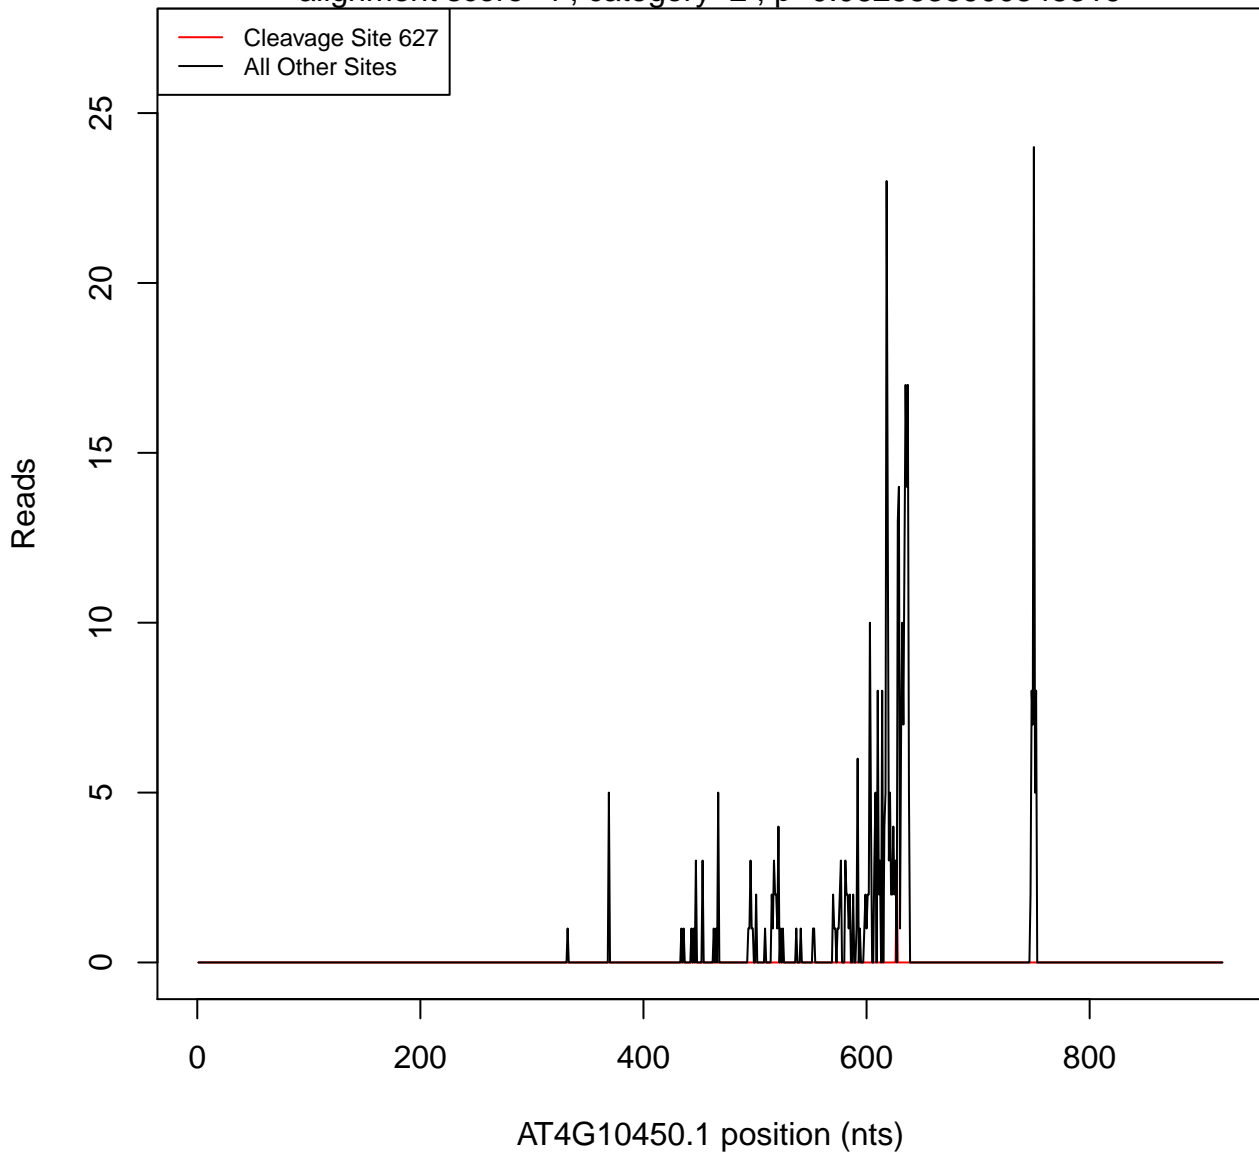



# PC-5p-56 slicing AT4G12800.1 at nt 385

alignment score=1.5 , category=2 , p=0.0538630989726218

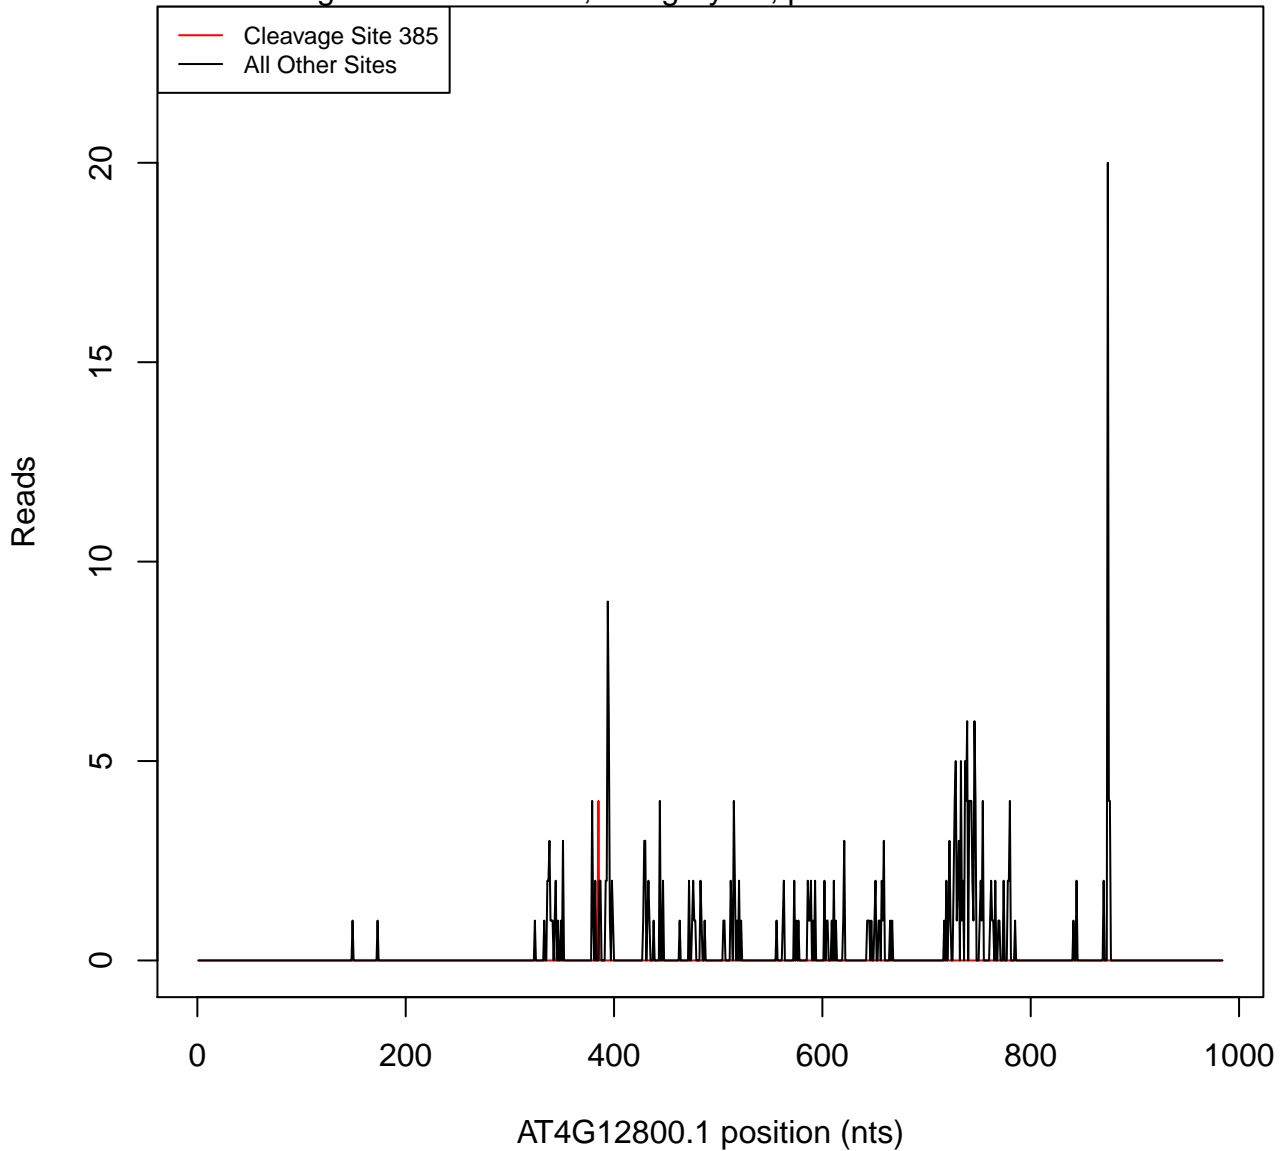

# ath-miR160a slicing AT4G30080.1 at nt 1519

alignment score=2.5 , category=0 , p=0.00276084387685427

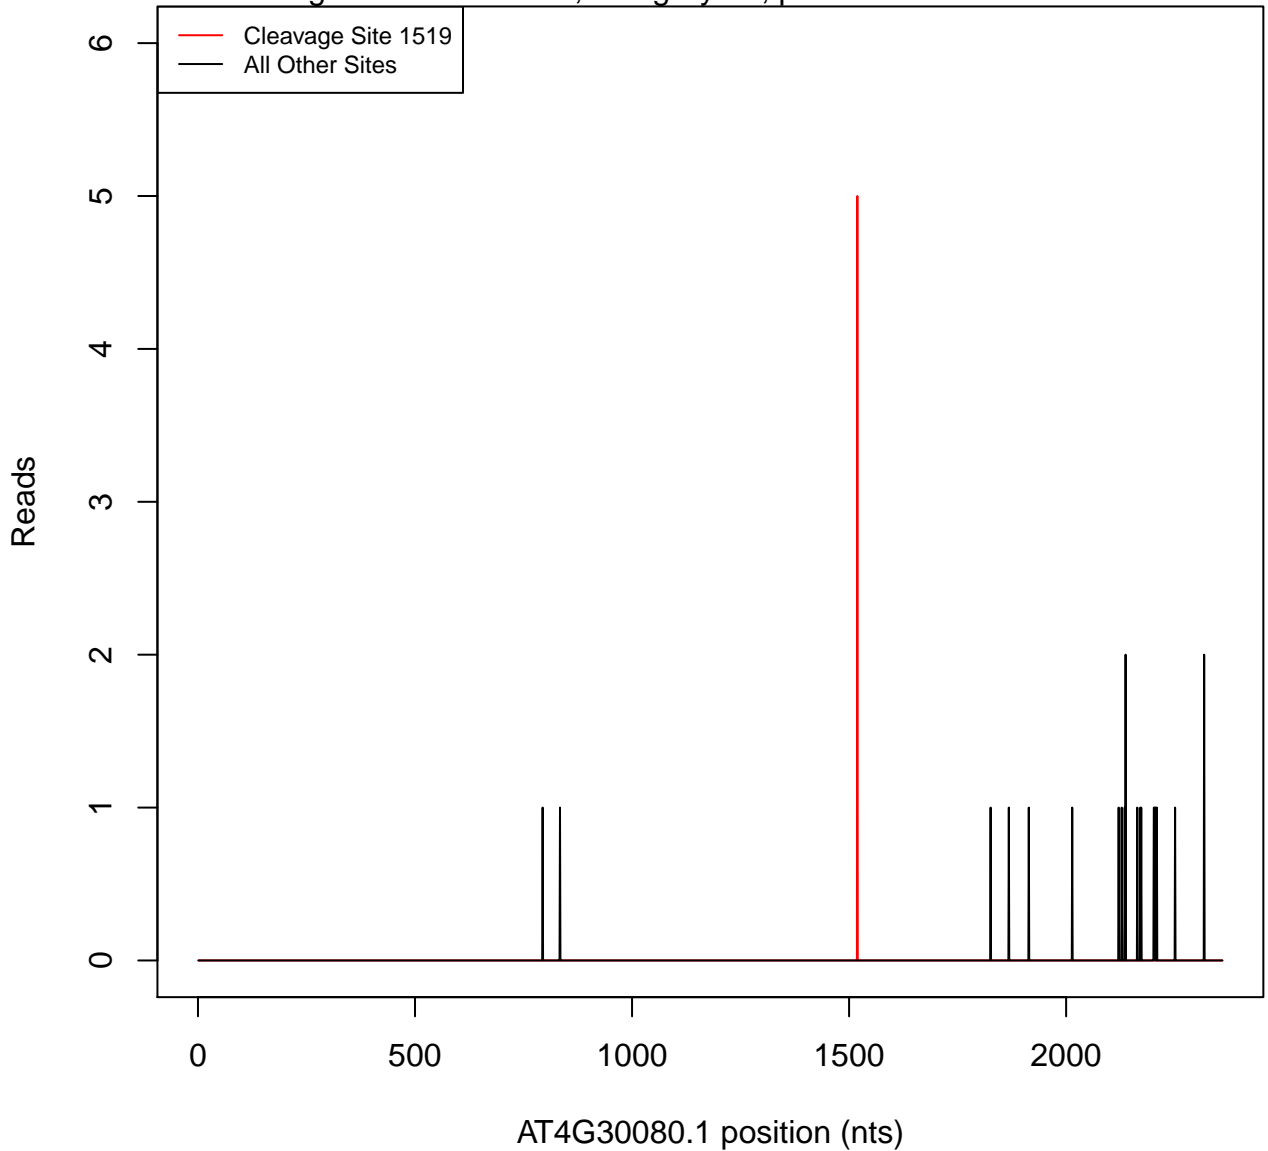

# ath-miR160b slicing AT4G30080.1 at nt 1519

alignment score=2.5 , category=0 , p=0.00276084387685427

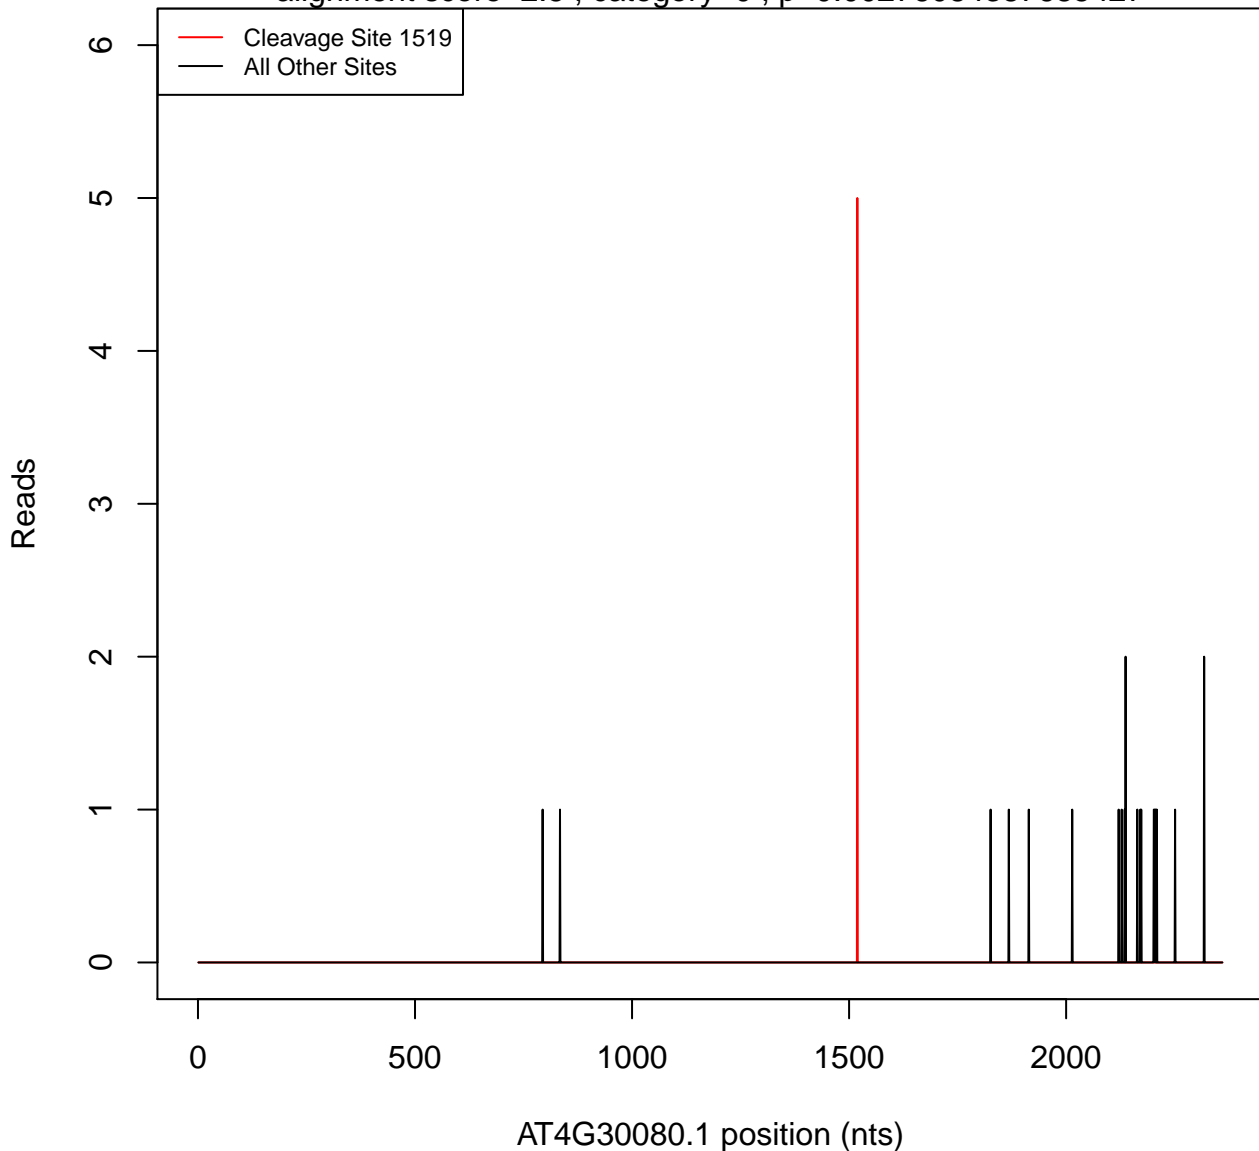

# ath-miR160c slicing AT4G30080.1 at nt 1519

alignment score=2.5 , category=0 , p=0.00276084387685427

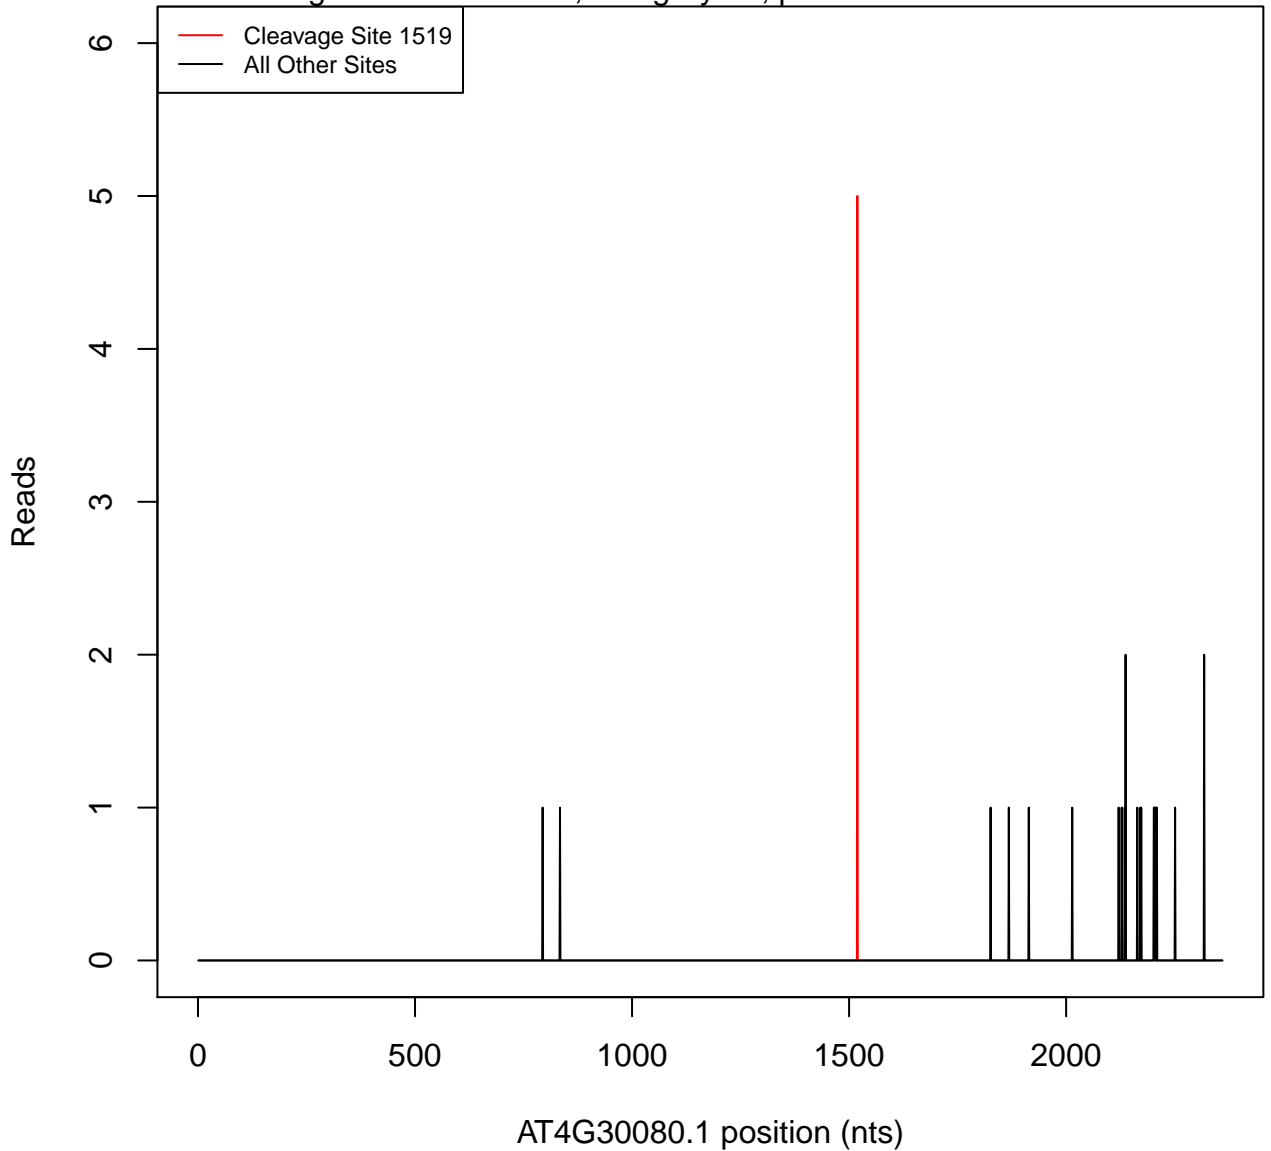

# ath-miR165a slicing AT4G32880.1 at nt 945

alignment score=2.5 , category=3 , p=0.0329128303306404

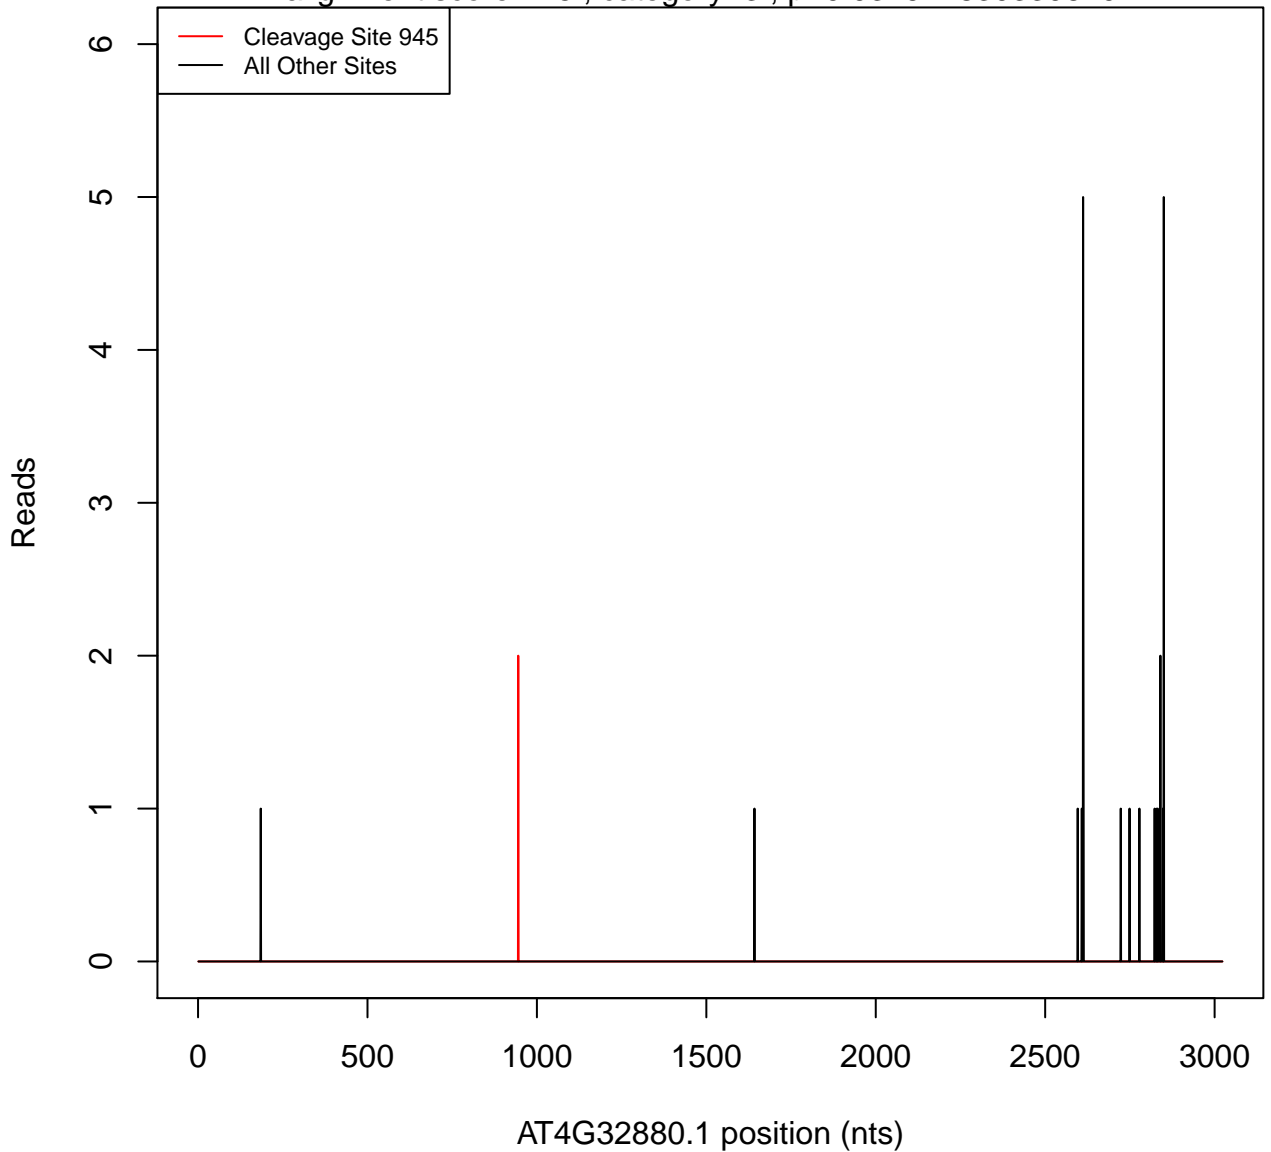

# ath-miR165b slicing AT4G32880.1 at nt 945

alignment score=2.5 , category=3 , p=0.0329128303306404



# ath-miR166a slicing AT4G32880.1 at nt 945

alignment score=3 , category=3 , p=0.0296708923966995

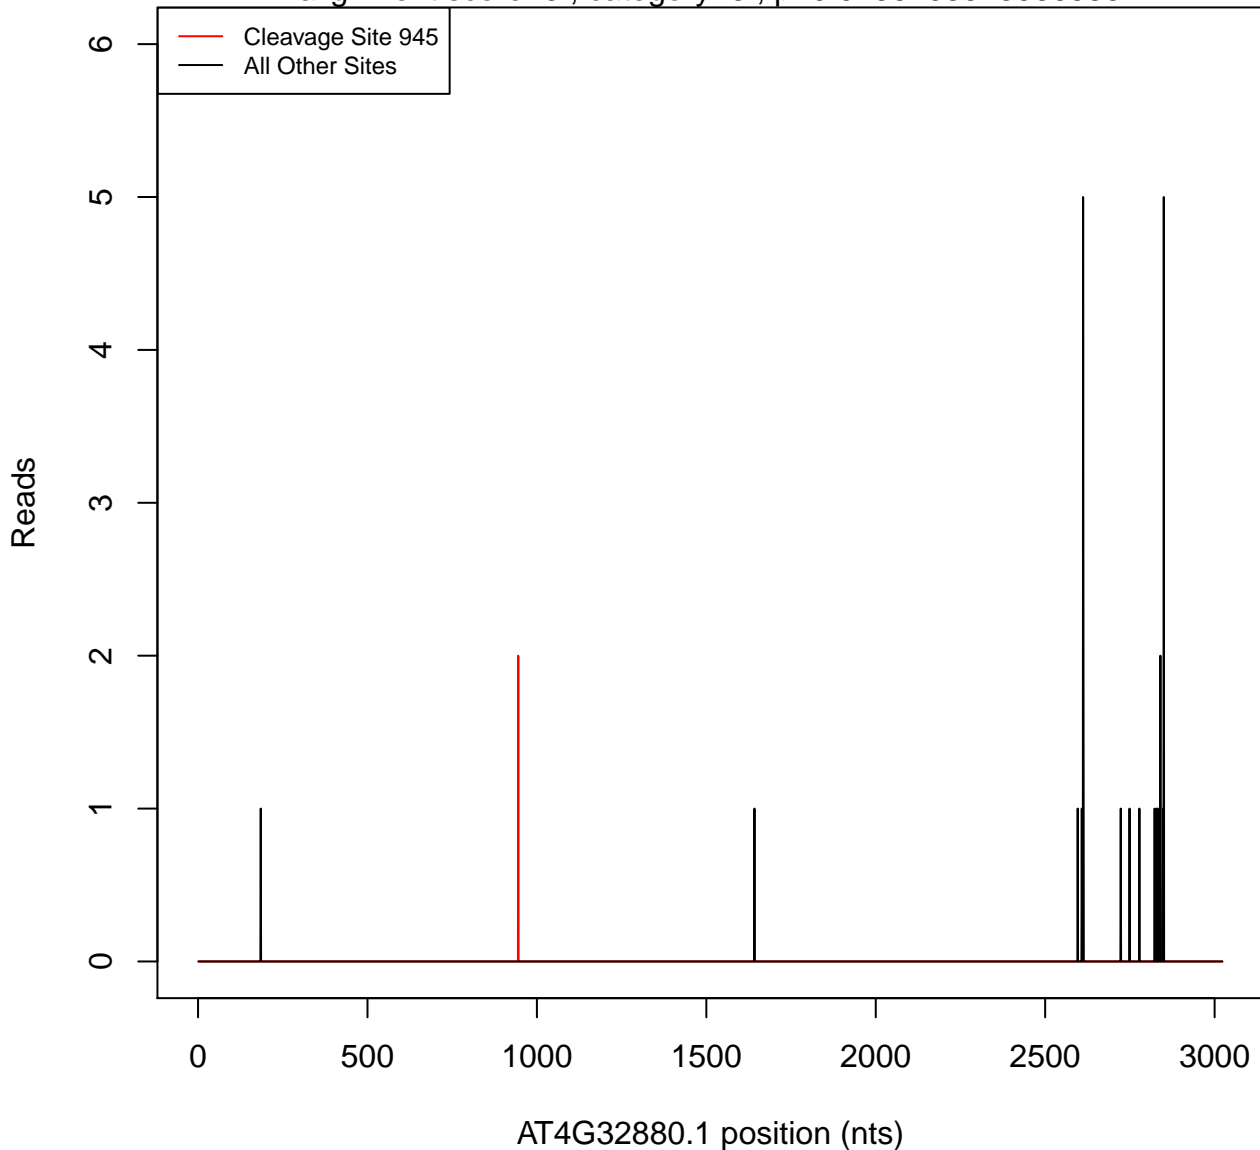

# ath-miR166b slicing AT4G32880.1 at nt 945

alignment score=3 , category=3 , p=0.0296708923966995

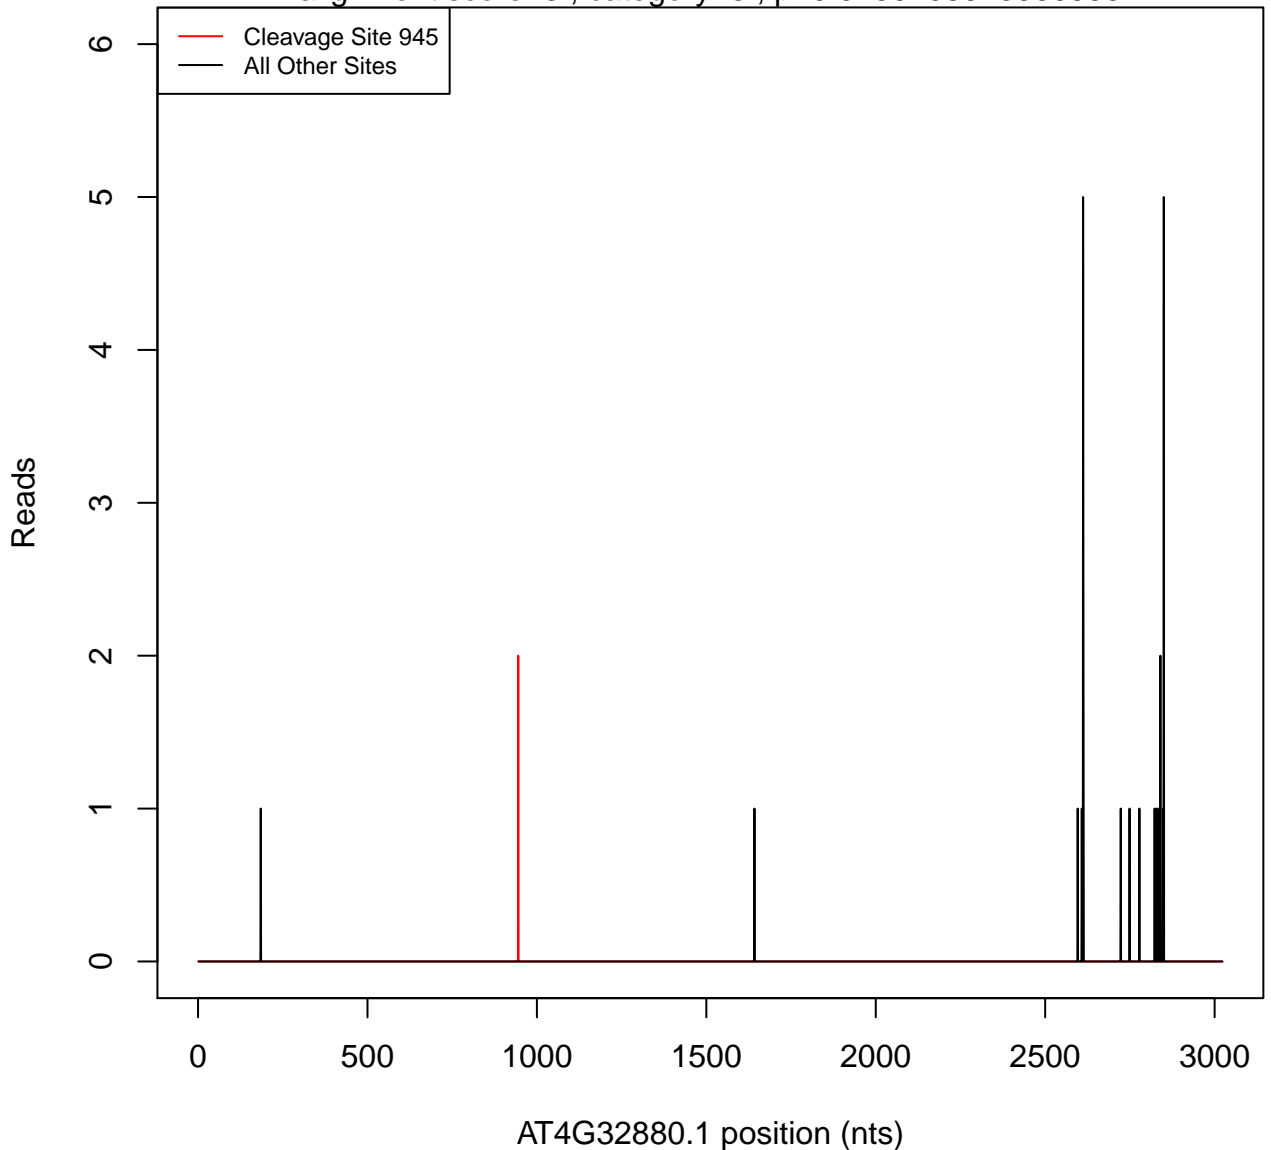



# ath-miR166c slicing AT4G32880.1 at nt 945

alignment score=3 , category=3 , p=0.0296708923966995

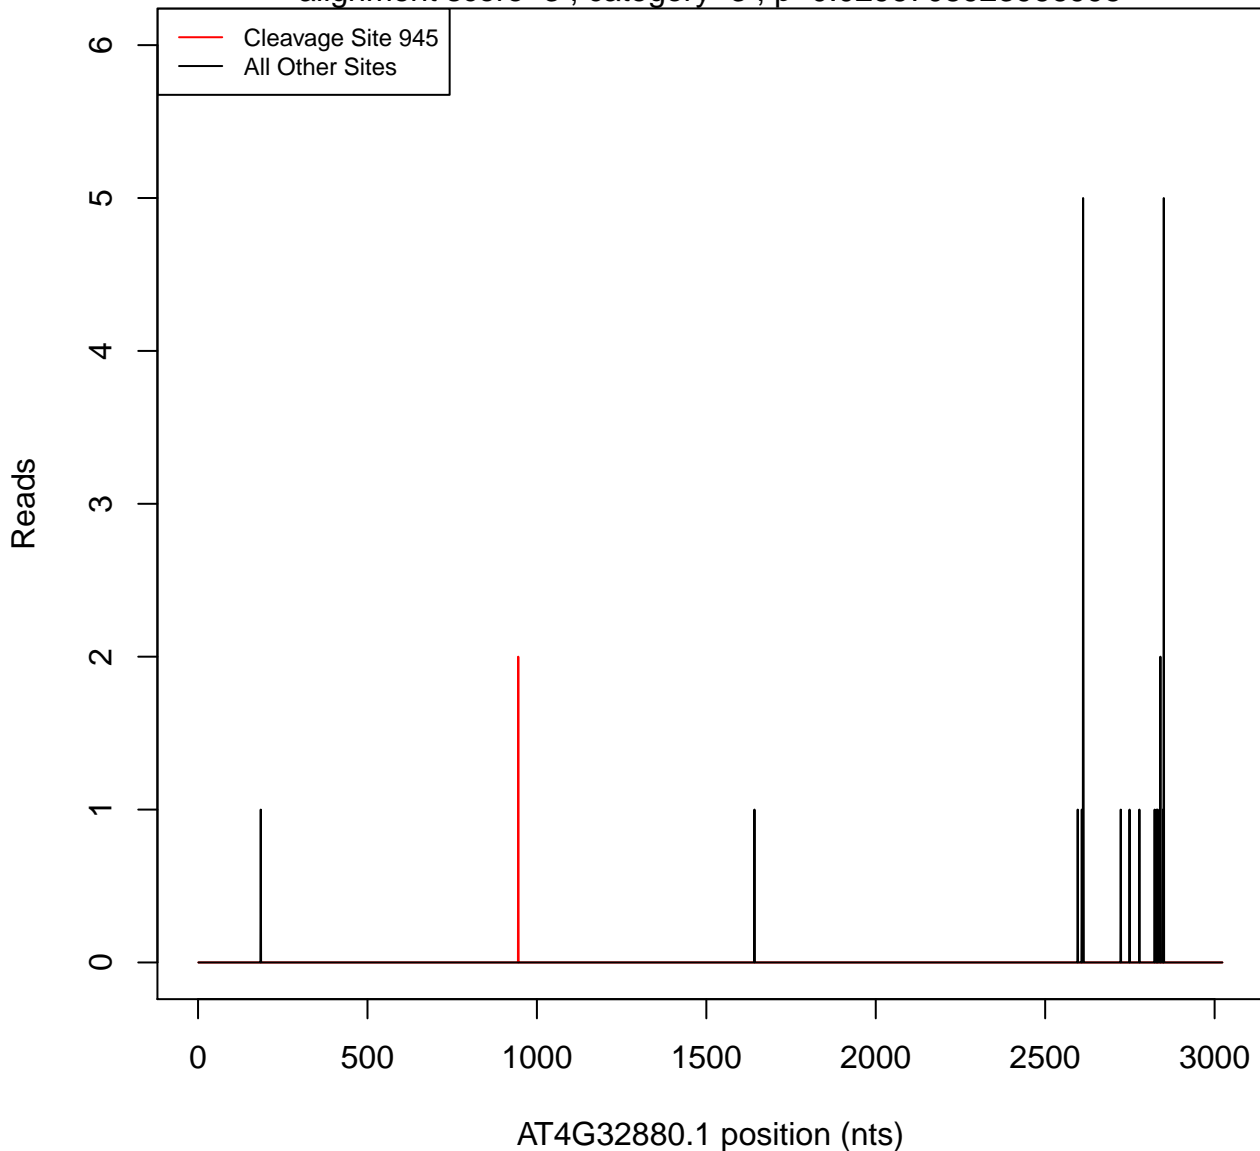

# ath-miR166d slicing AT4G32880.1 at nt 945

alignment score=3 , category=3 , p=0.0296708923966995

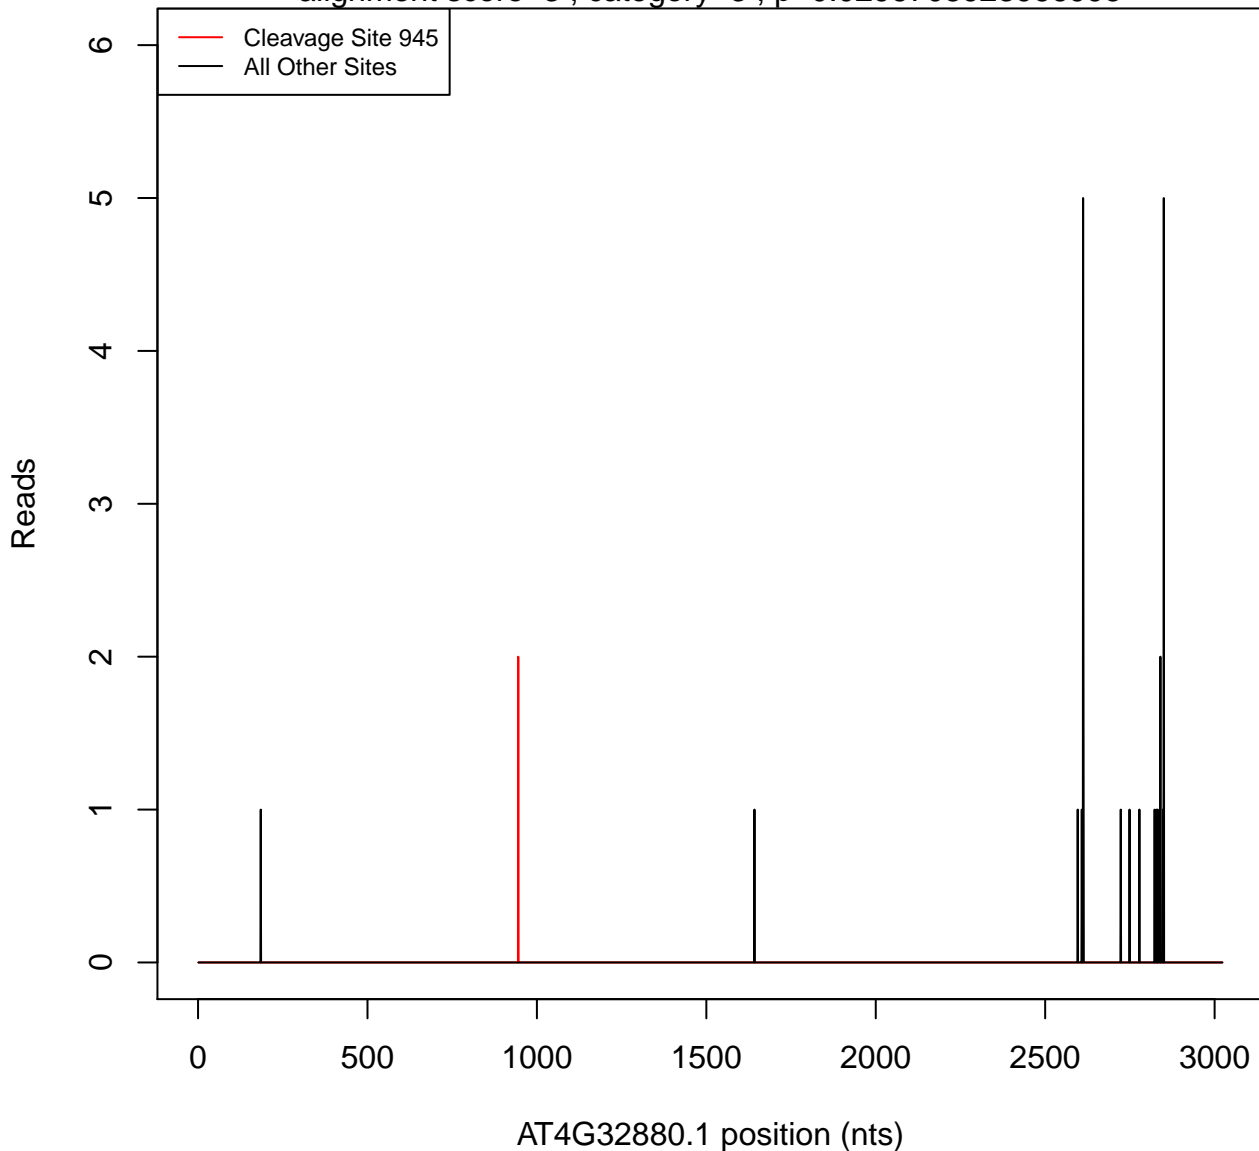

# ath-miR166e slicing AT4G32880.1 at nt 945

alignment score=3 , category=3 , p=0.0296708923966995



# ath-miR166f slicing AT4G32880.1 at nt 945

alignment score=3 , category=3 , p=0.0296708923966995



# ath-miR166g slicing AT4G32880.1 at nt 945

alignment score=3 , category=3 , p=0.0296708923966995

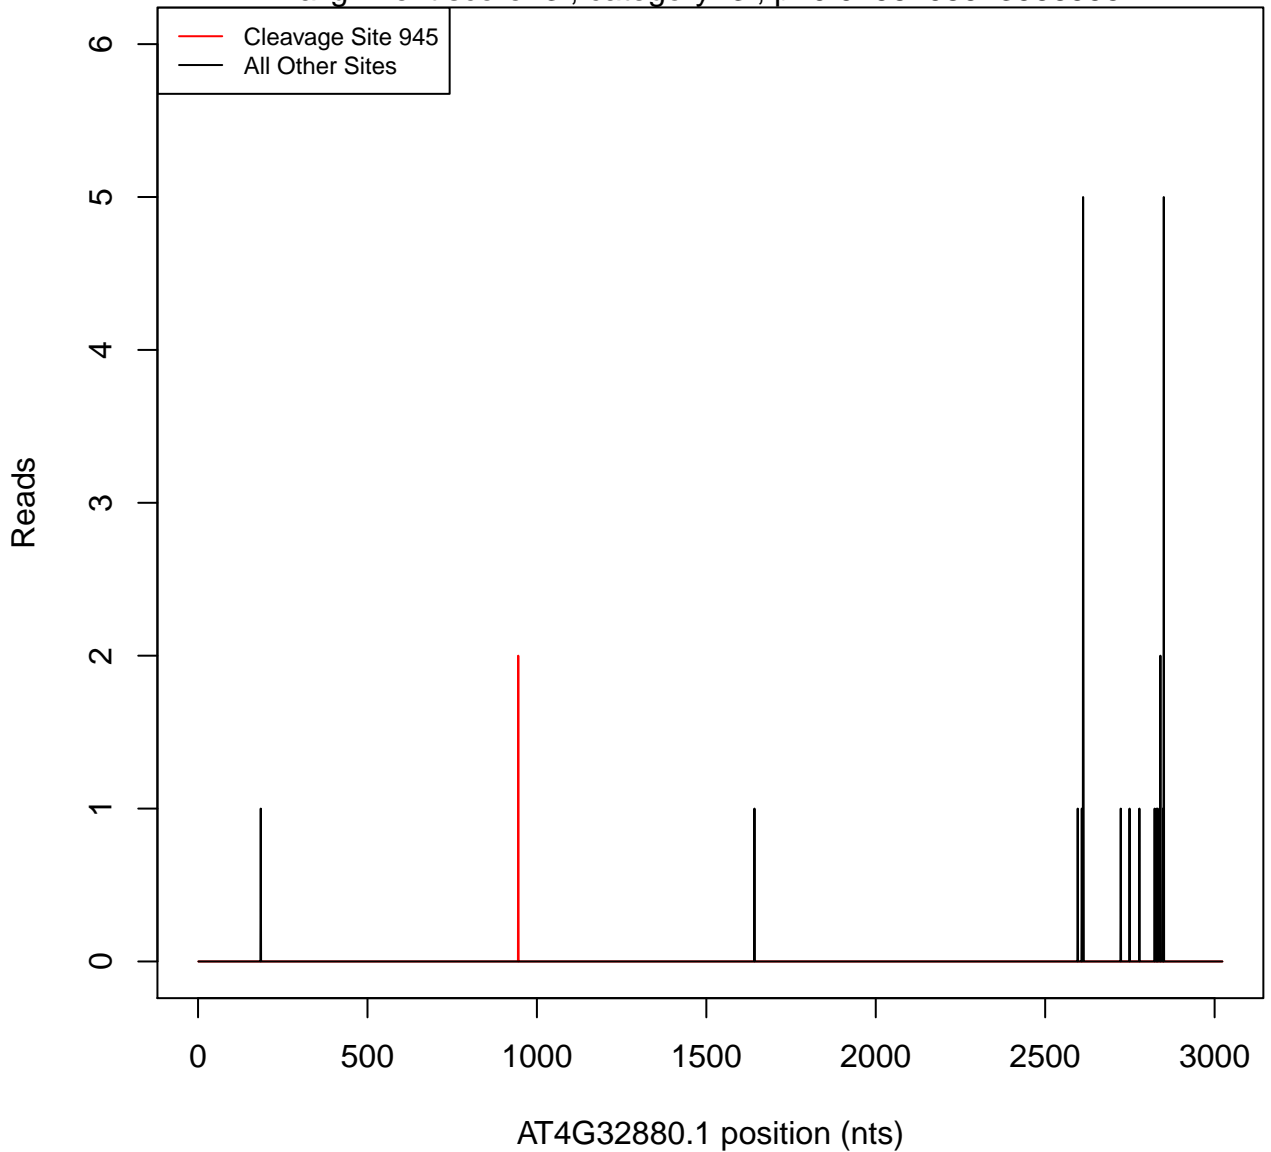

# gma-miR166a-3p\_1ss21CT slicing AT4G32880.1 at nt 945

alignment score=3 , category=3 , p=0.0296708923966995



# ath-miR172a slicing AT4G36920.1 at nt 1340

alignment score=2 , category=0 , p=0.0120908243663383

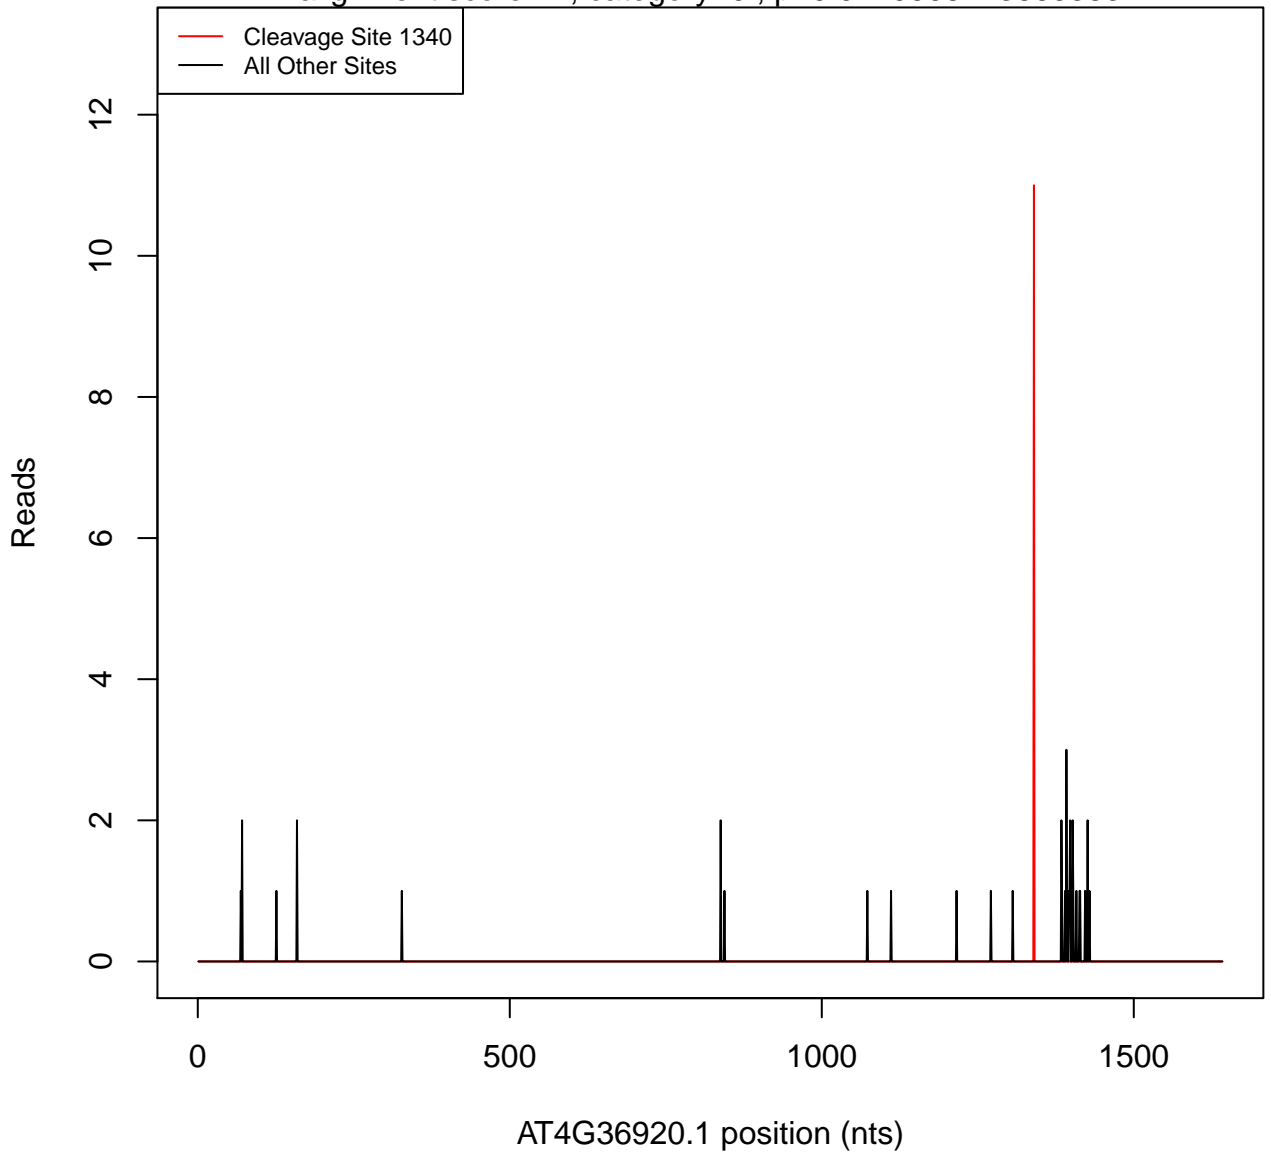

# ath-miR172b slicing AT4G36920.1 at nt 1340

alignment score=2 , category=0 , p=0.0120908243663383

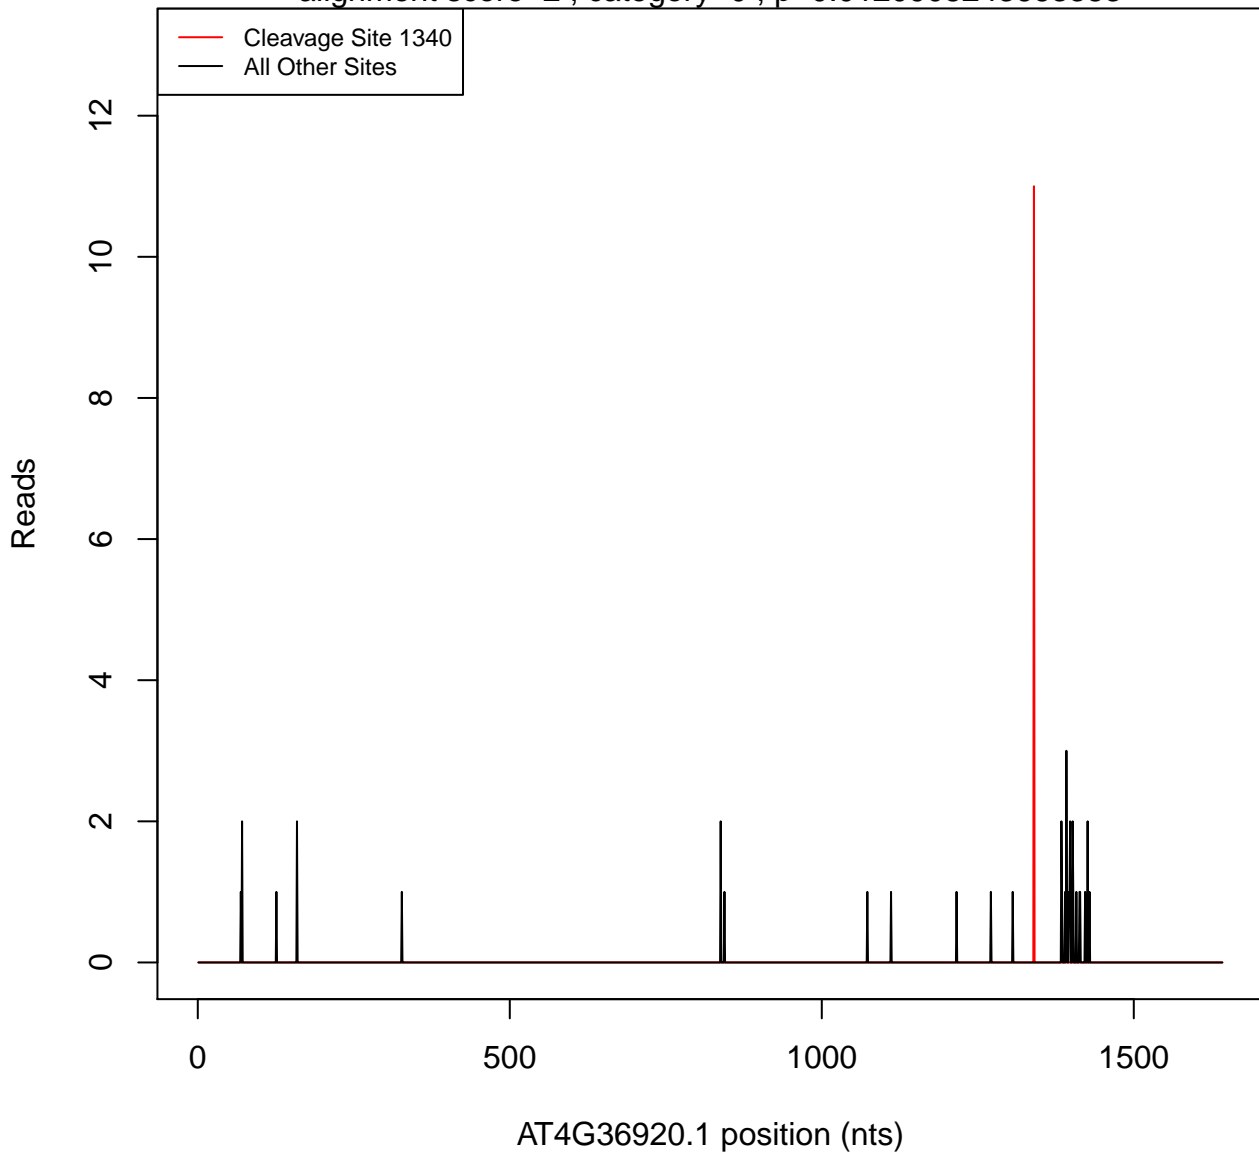



# ath-miR172c slicing AT4G36920.1 at nt 1340

alignment score=1 , category=0 , p=0.00716234853795084

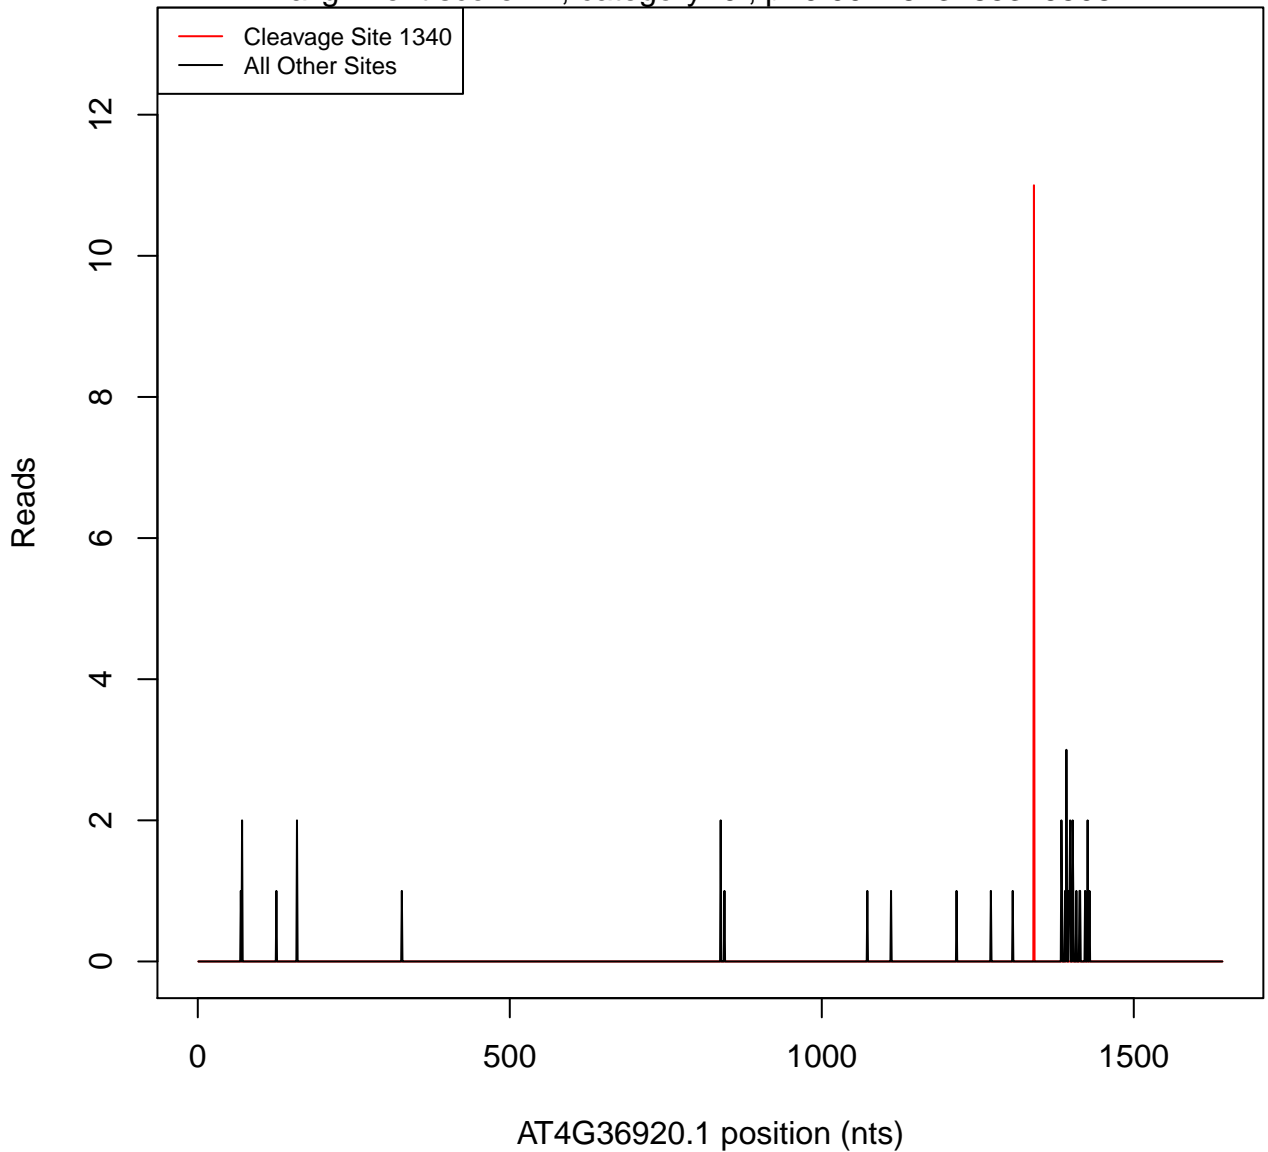

# ath-miR172d slicing AT4G36920.1 at nt 1340

alignment score=1 , category=0 , p=0.00716234853795084

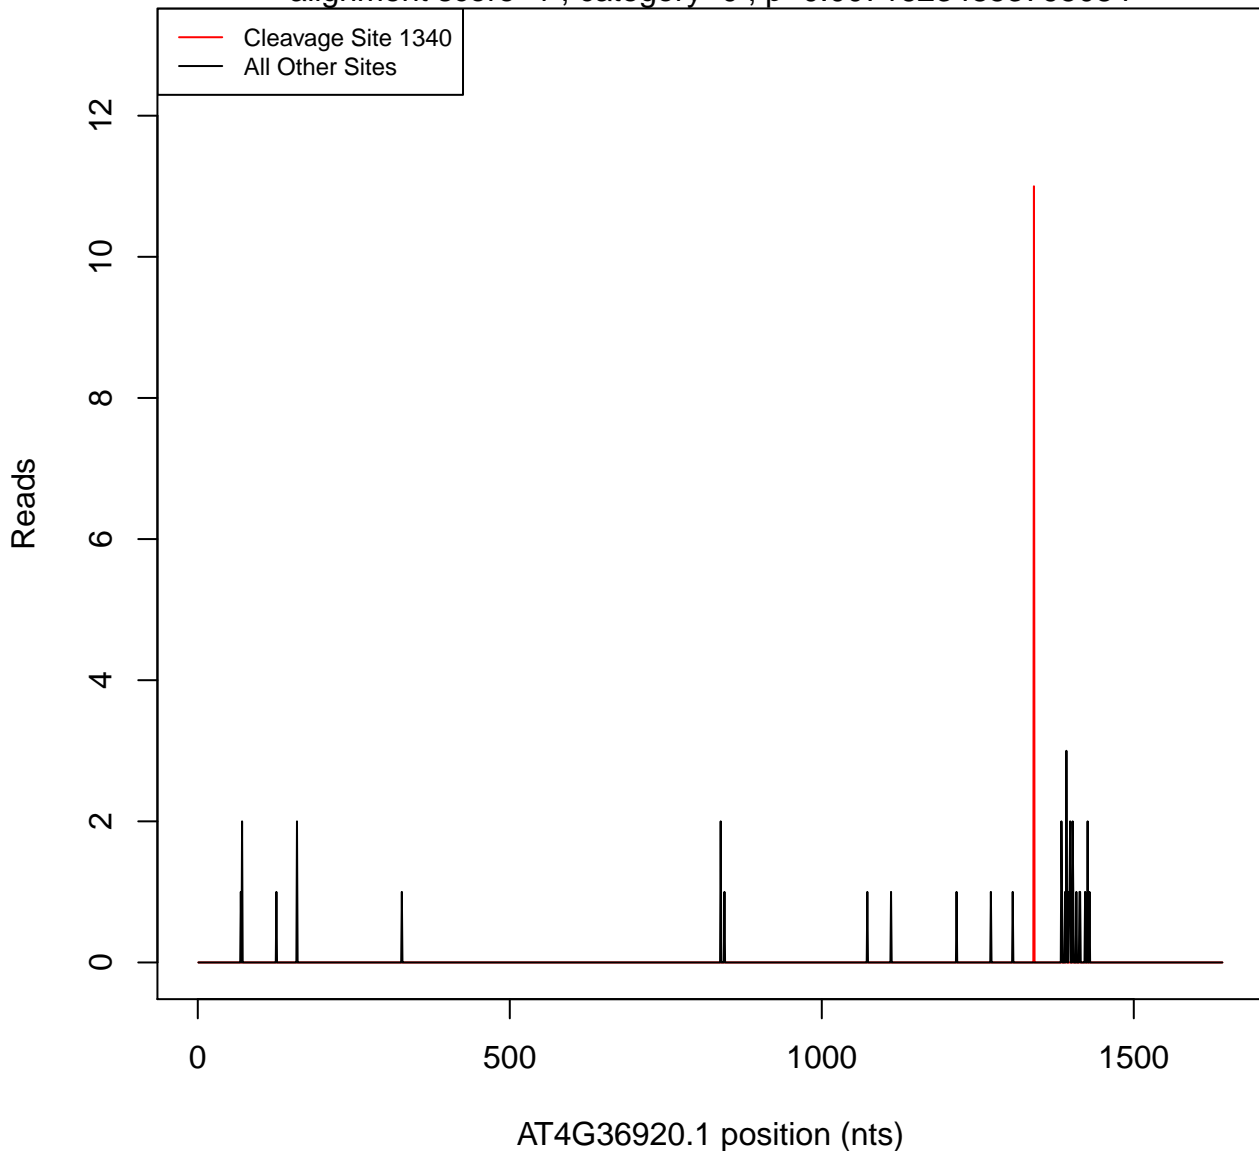

# ath-miR172e slicing AT4G36920.1 at nt 1340

alignment score=2.5 , category=0 , p=0.0218745021638835

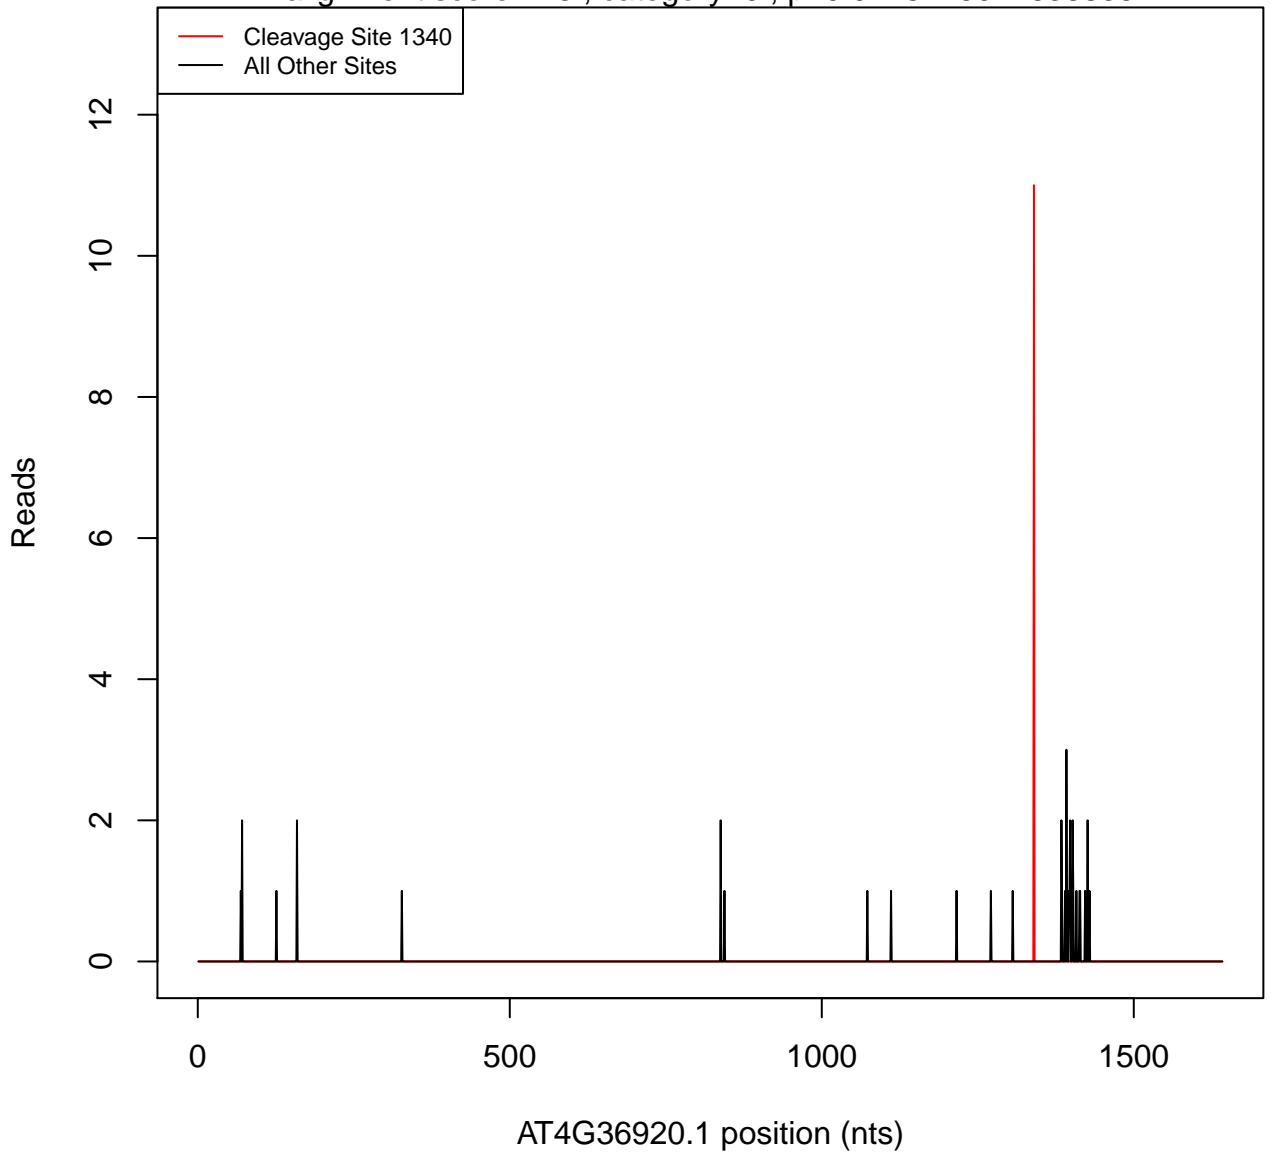

# ath-miR172a slicing AT4G36920.2 at nt 1304

alignment score=2 , category=0 , p=0.0120908243663383

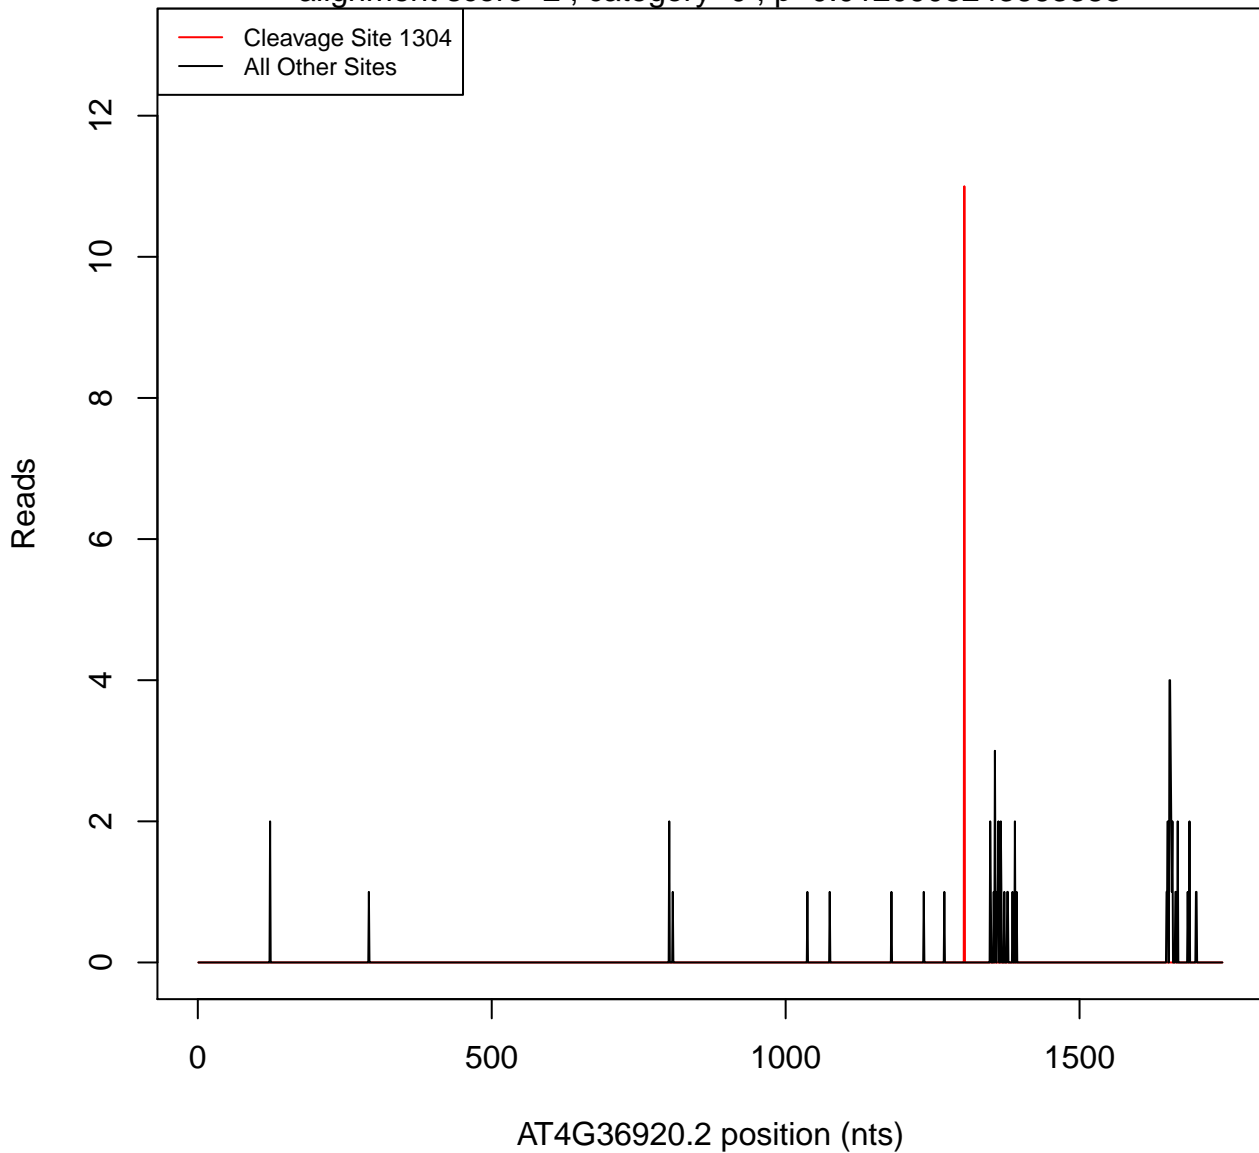

# ath-miR172b slicing AT4G36920.2 at nt 1304

alignment score=2 , category=0 , p=0.0120908243663383

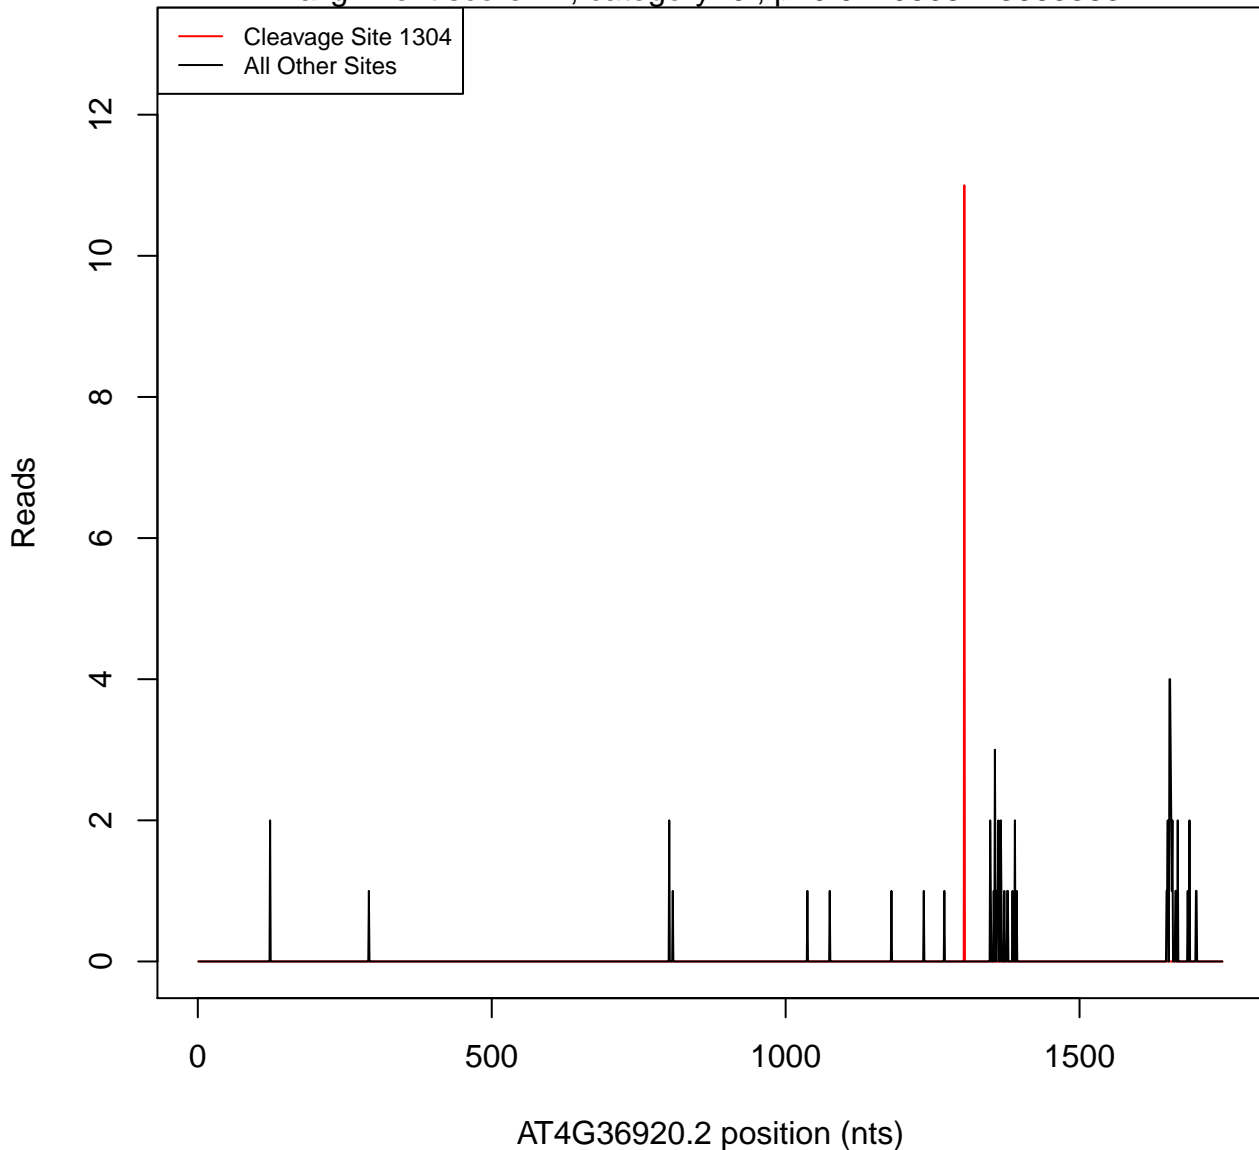

# ath-miR172c slicing AT4G36920.2 at nt 1304

alignment score=1 , category=0 , p=0.00716234853795084

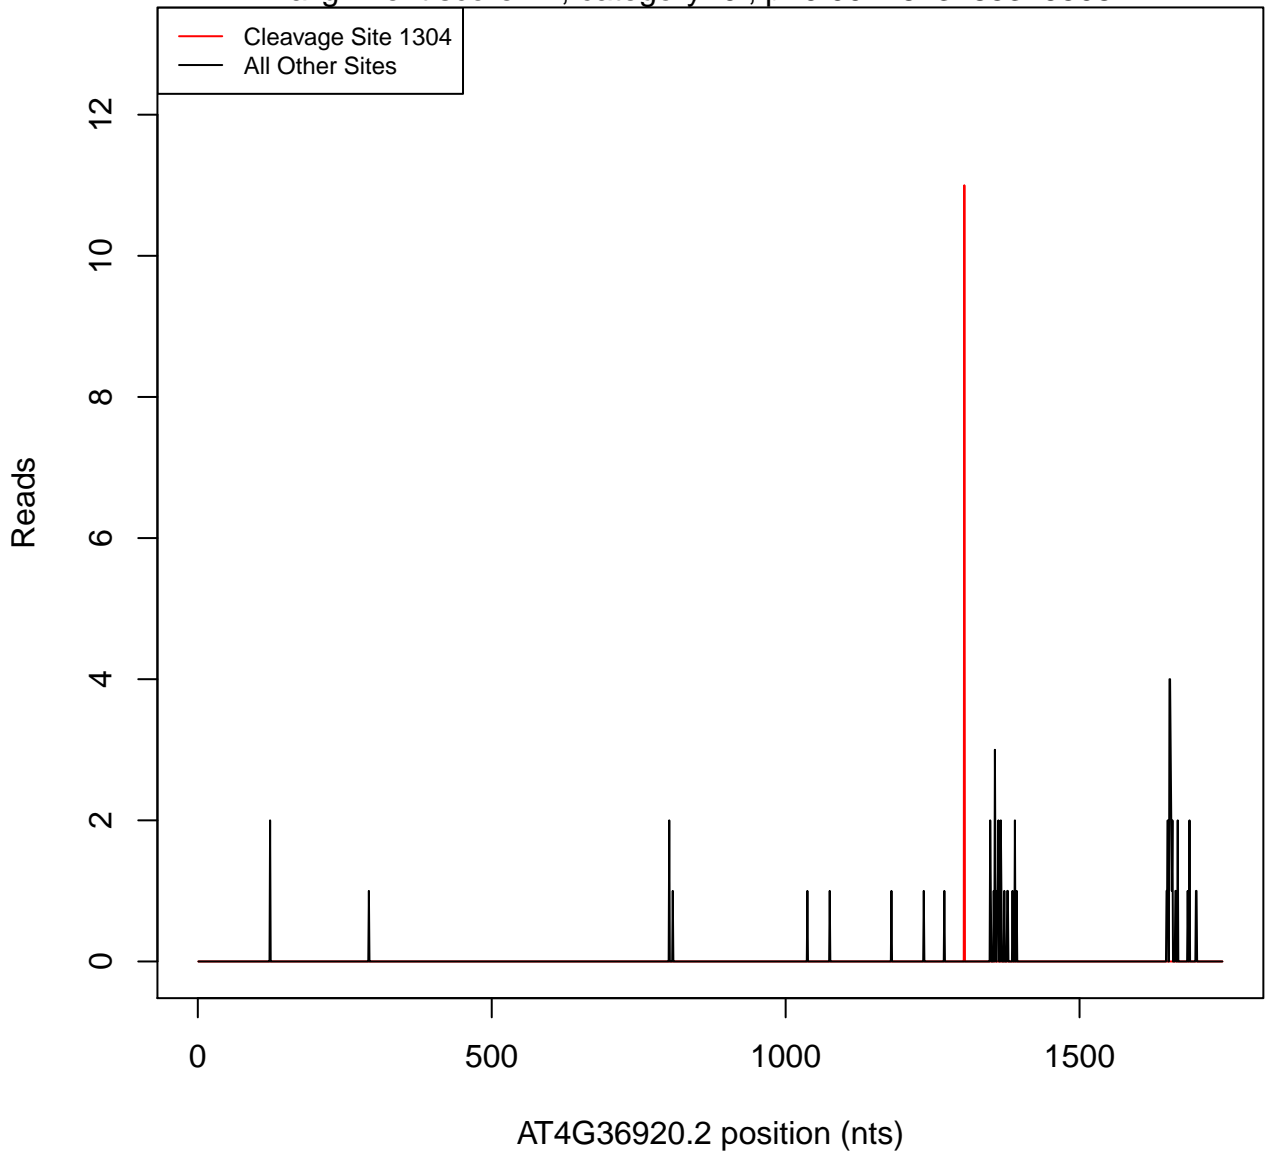

# ath-miR172d slicing AT4G36920.2 at nt 1304

alignment score=1 , category=0 , p=0.00716234853795084

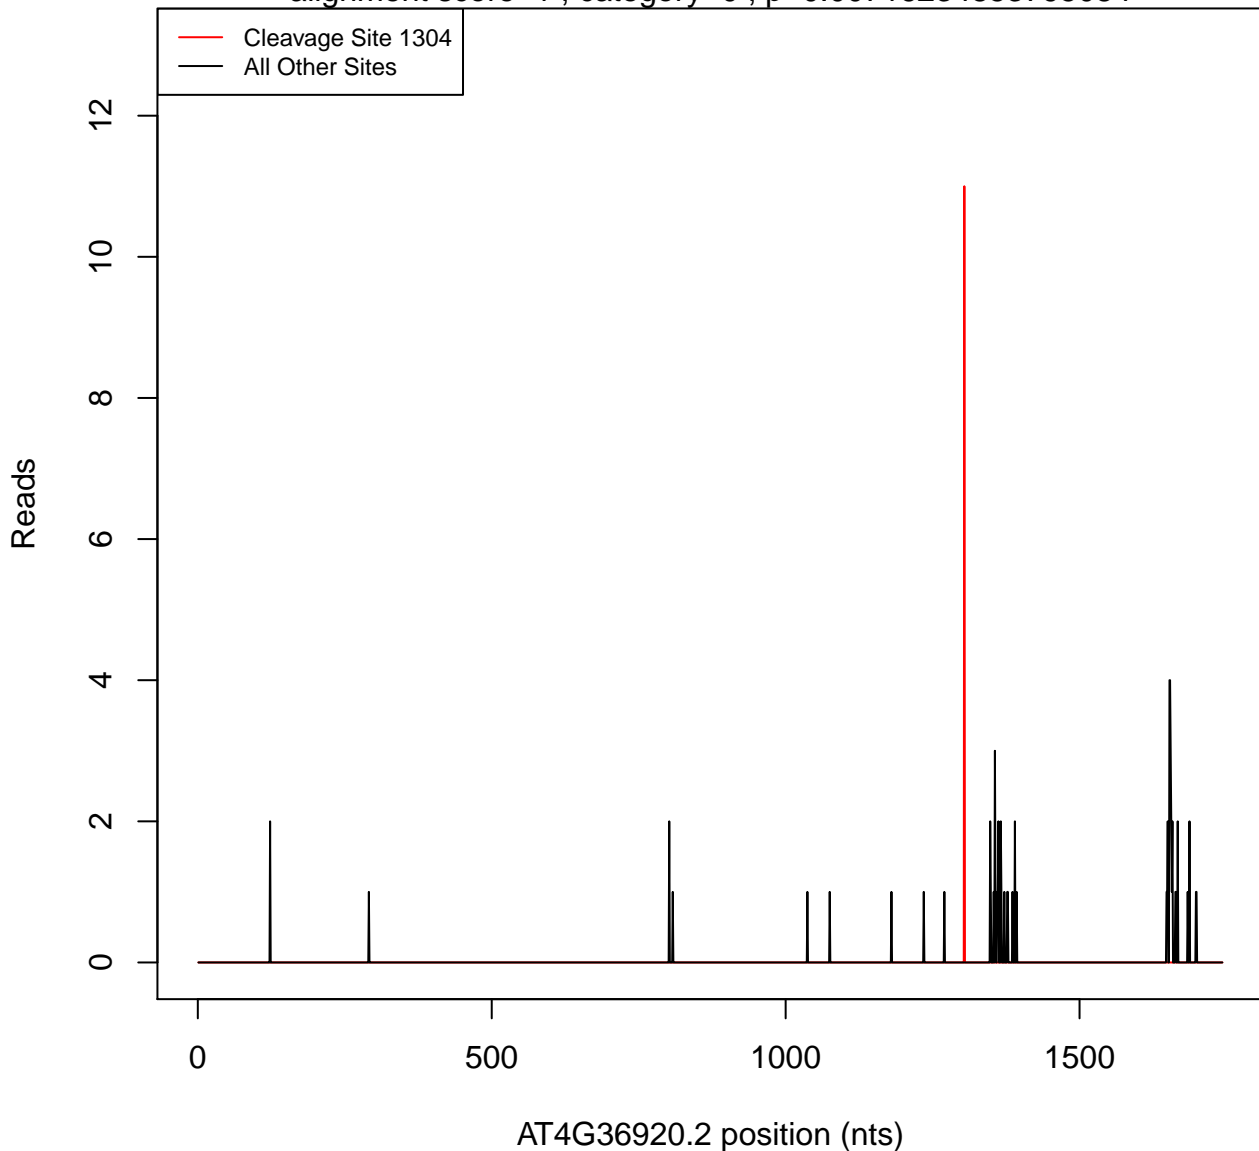

# ath-miR172e slicing AT4G36920.2 at nt 1304

alignment score=2.5 , category=0 , p=0.0218745021638835

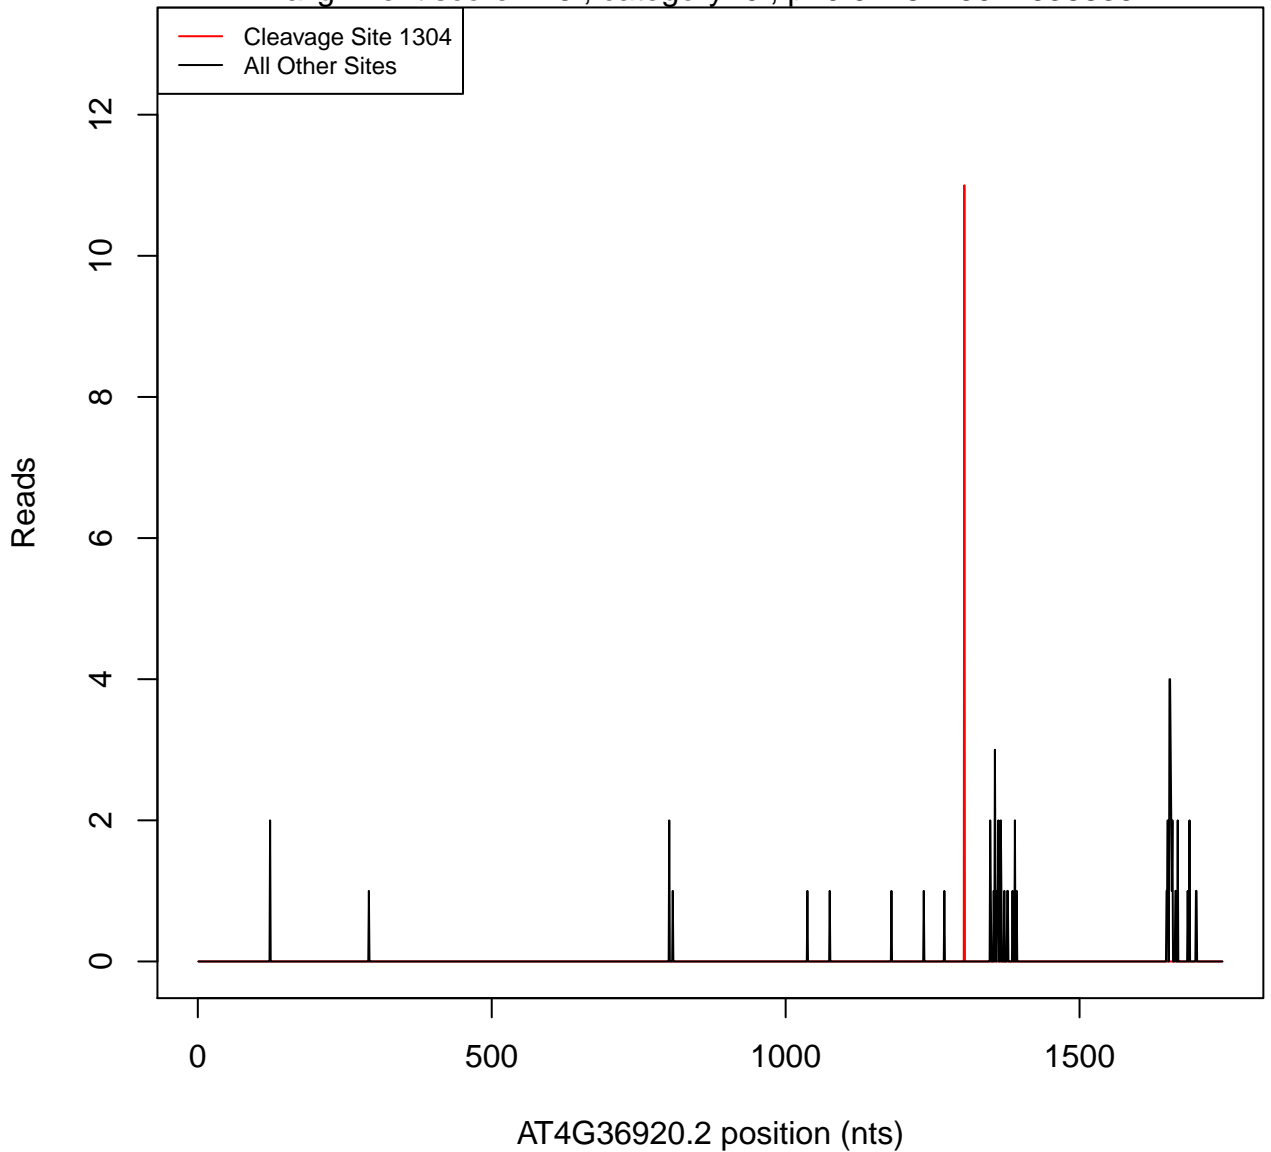



# ath-miR2934-3p slicing AT5G15650.1 at nt 479

alignment score=4 , category=3 , p=0.0288587112321645

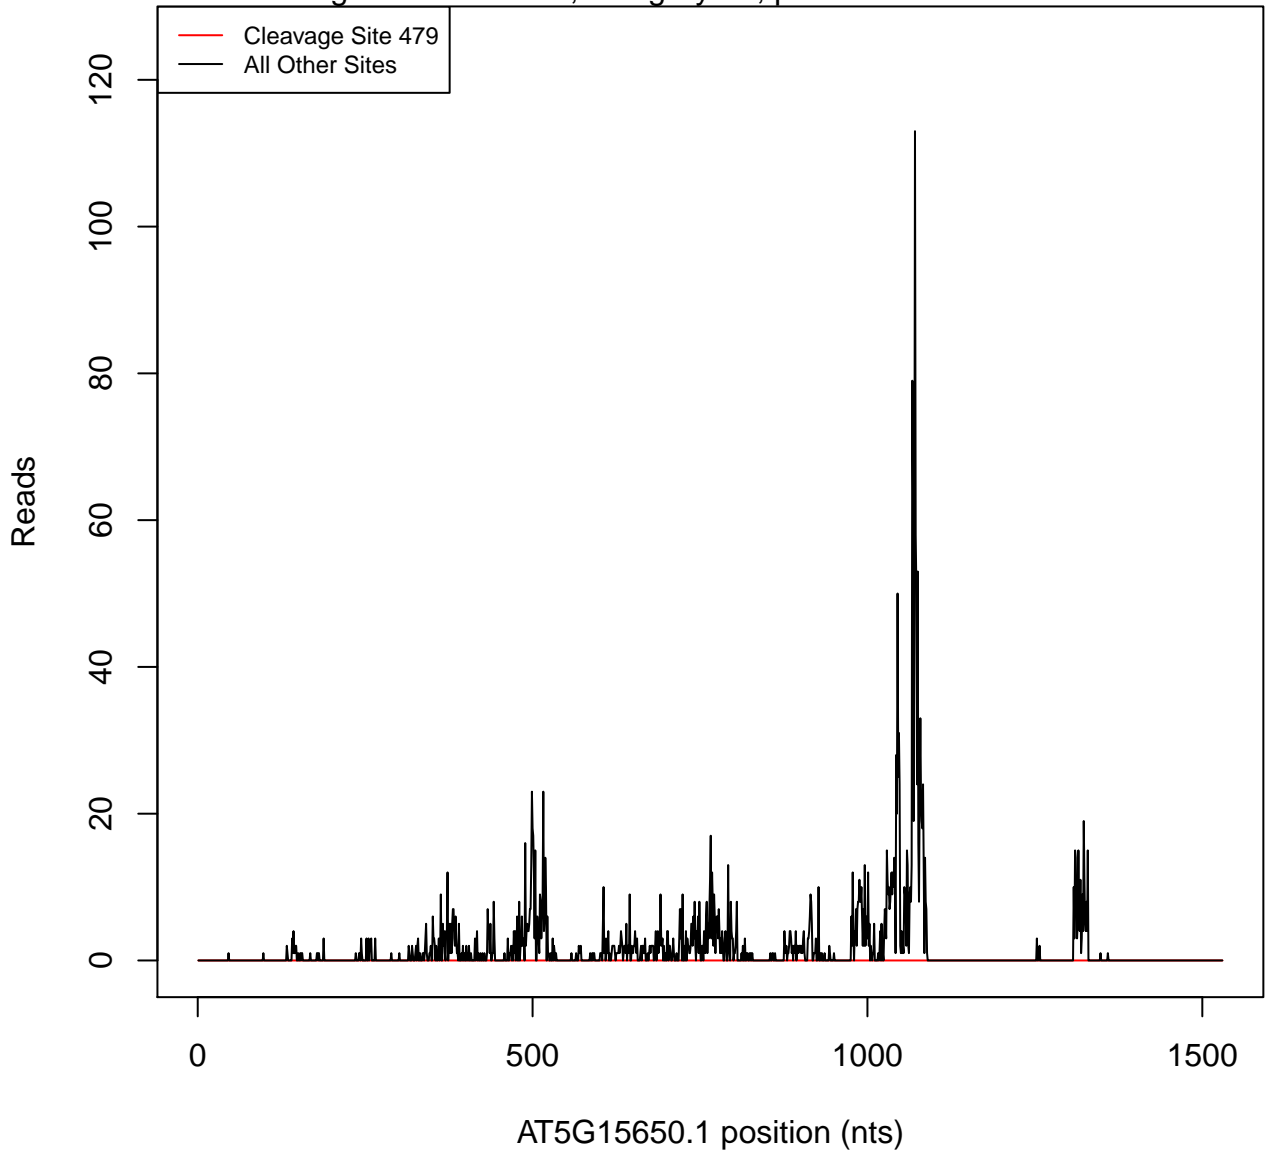

# PC-5p-52 slicing AT5G18310.1 at nt 31

alignment score=3.5 , category=0 , p=0.0785750940096313

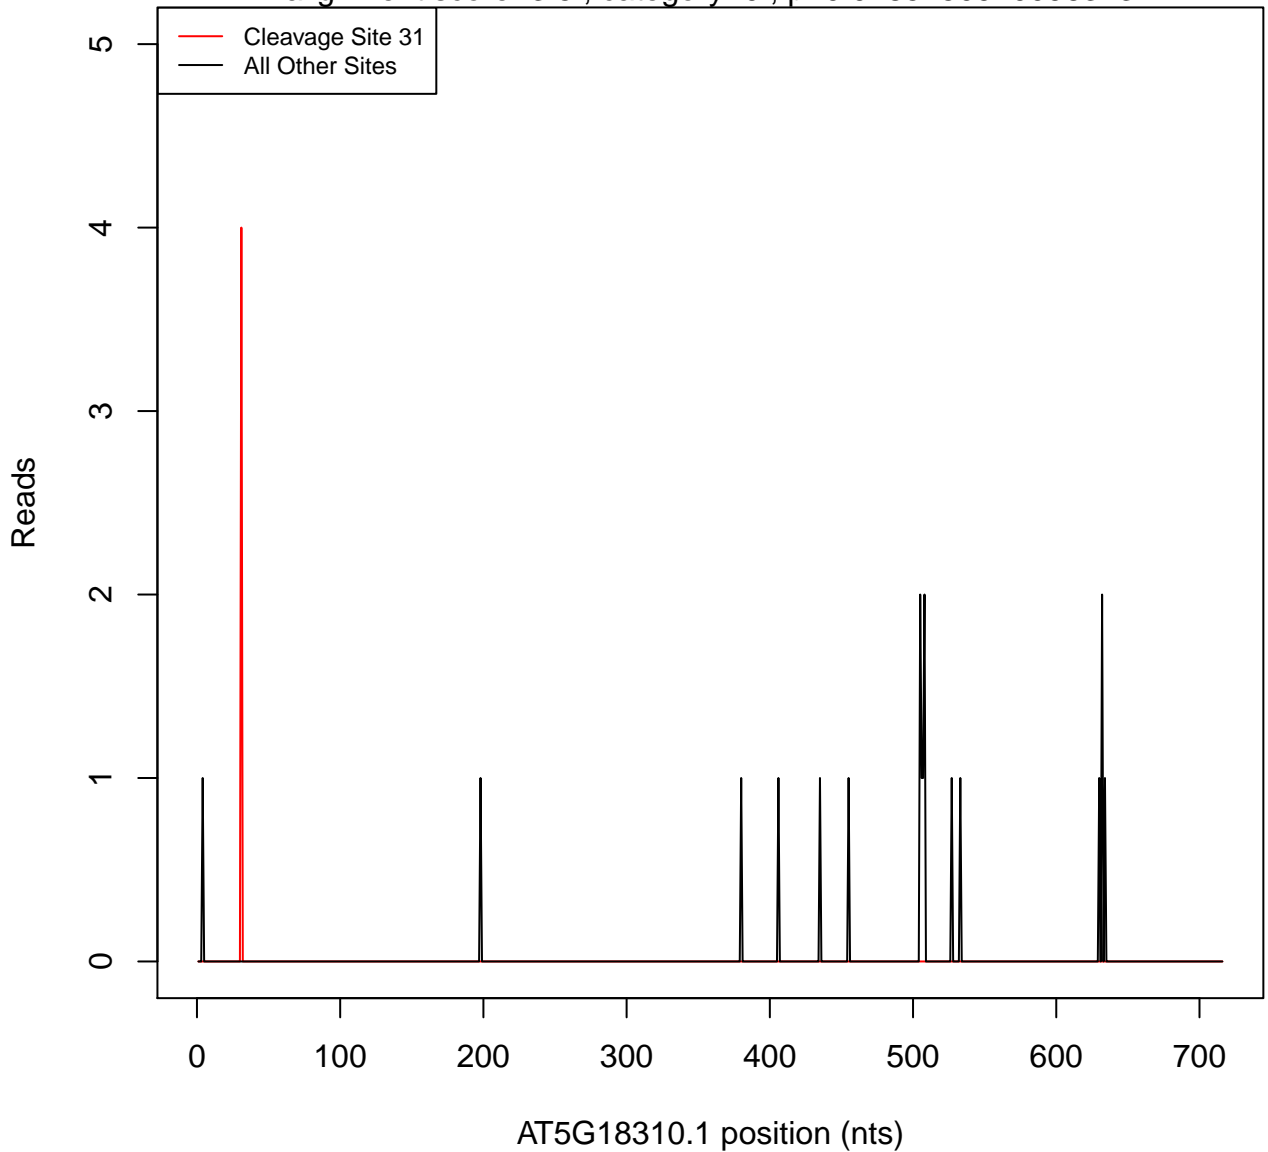

# PC-5p-52 slicing AT5G18310.2 at nt 24

alignment score=3.5 , category=0 , p=0.0785750940096313

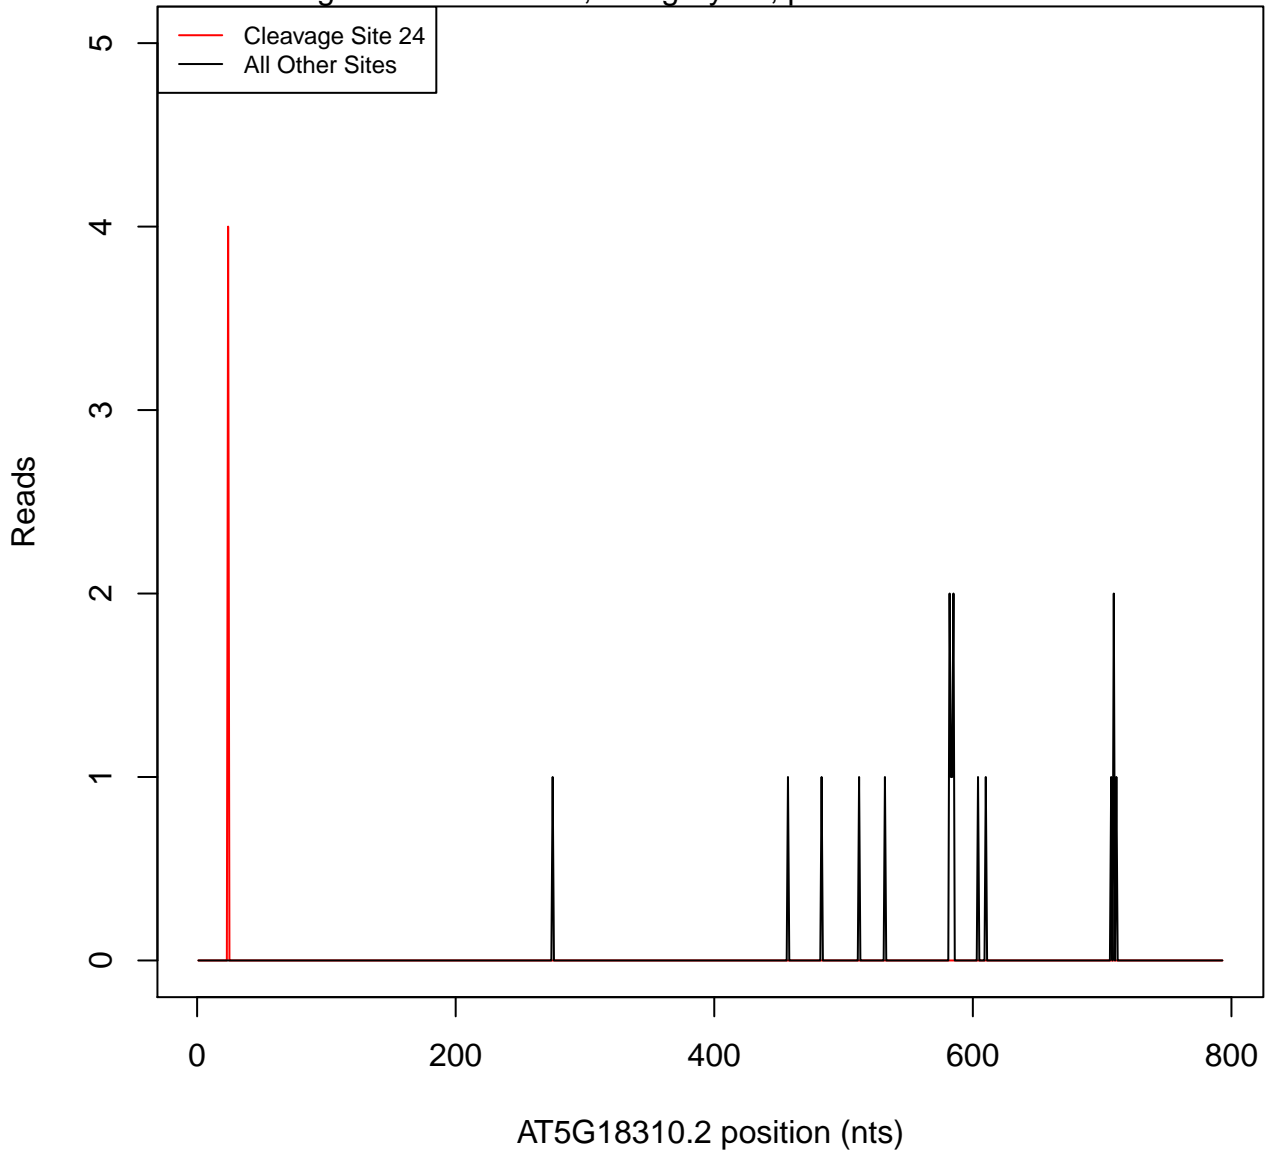

# ath-miR167c slicing AT5G37020.1 at nt 2380

alignment score=4 , category=2 , p=0.0625538900545319

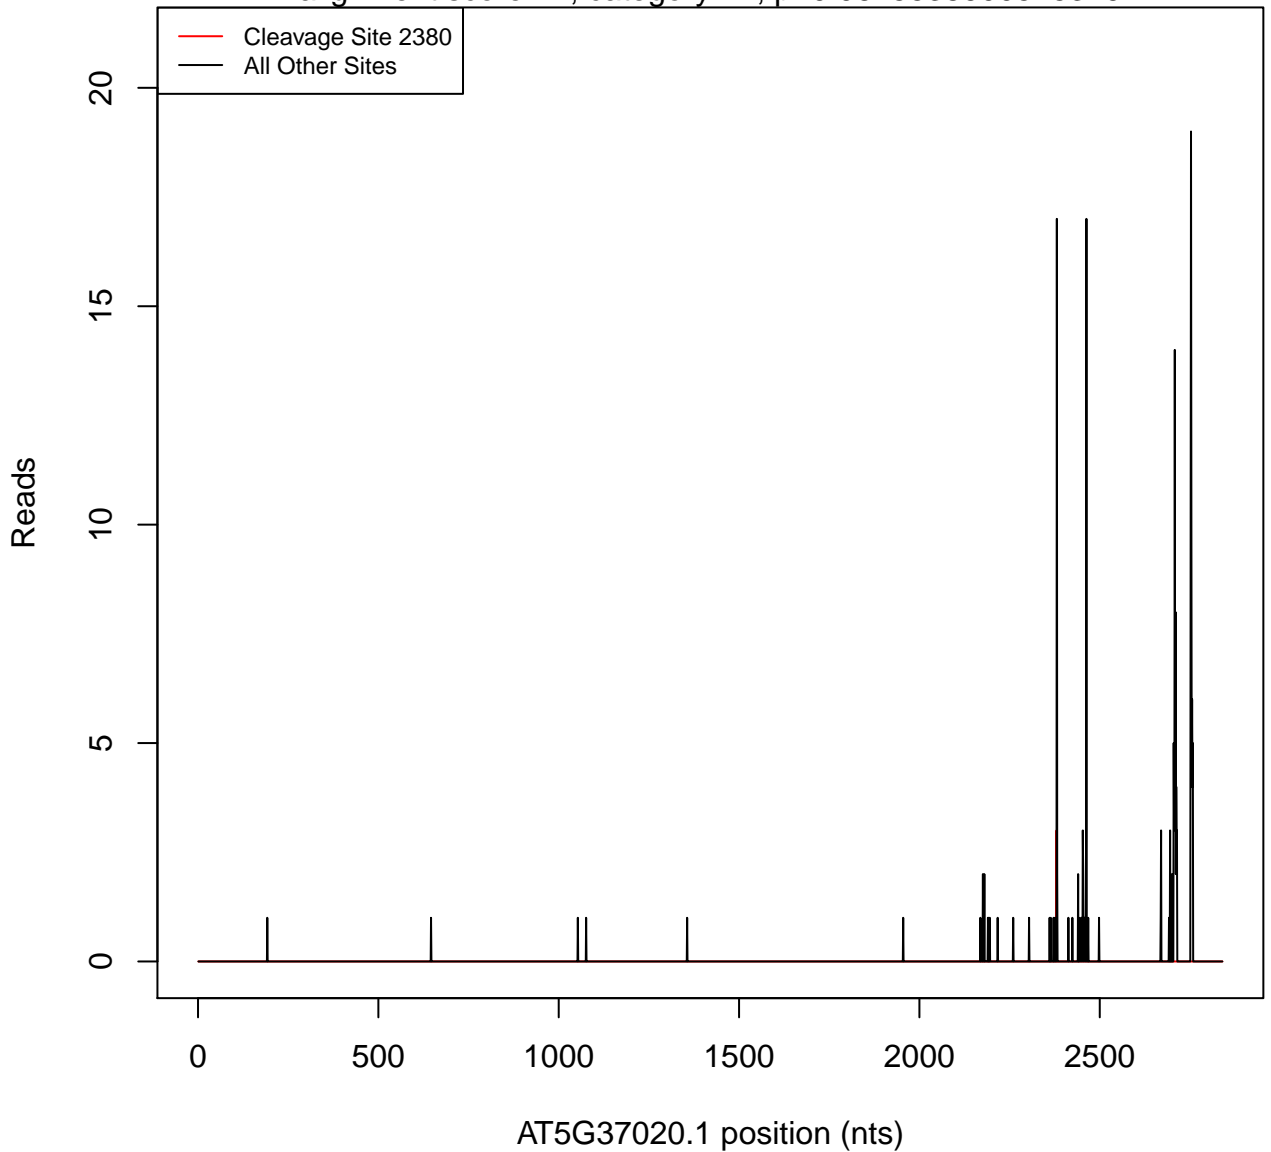

# ath-miR167c slicing AT5G37020.2 at nt 2380

alignment score=4 , category=2 , p=0.0625538900545319

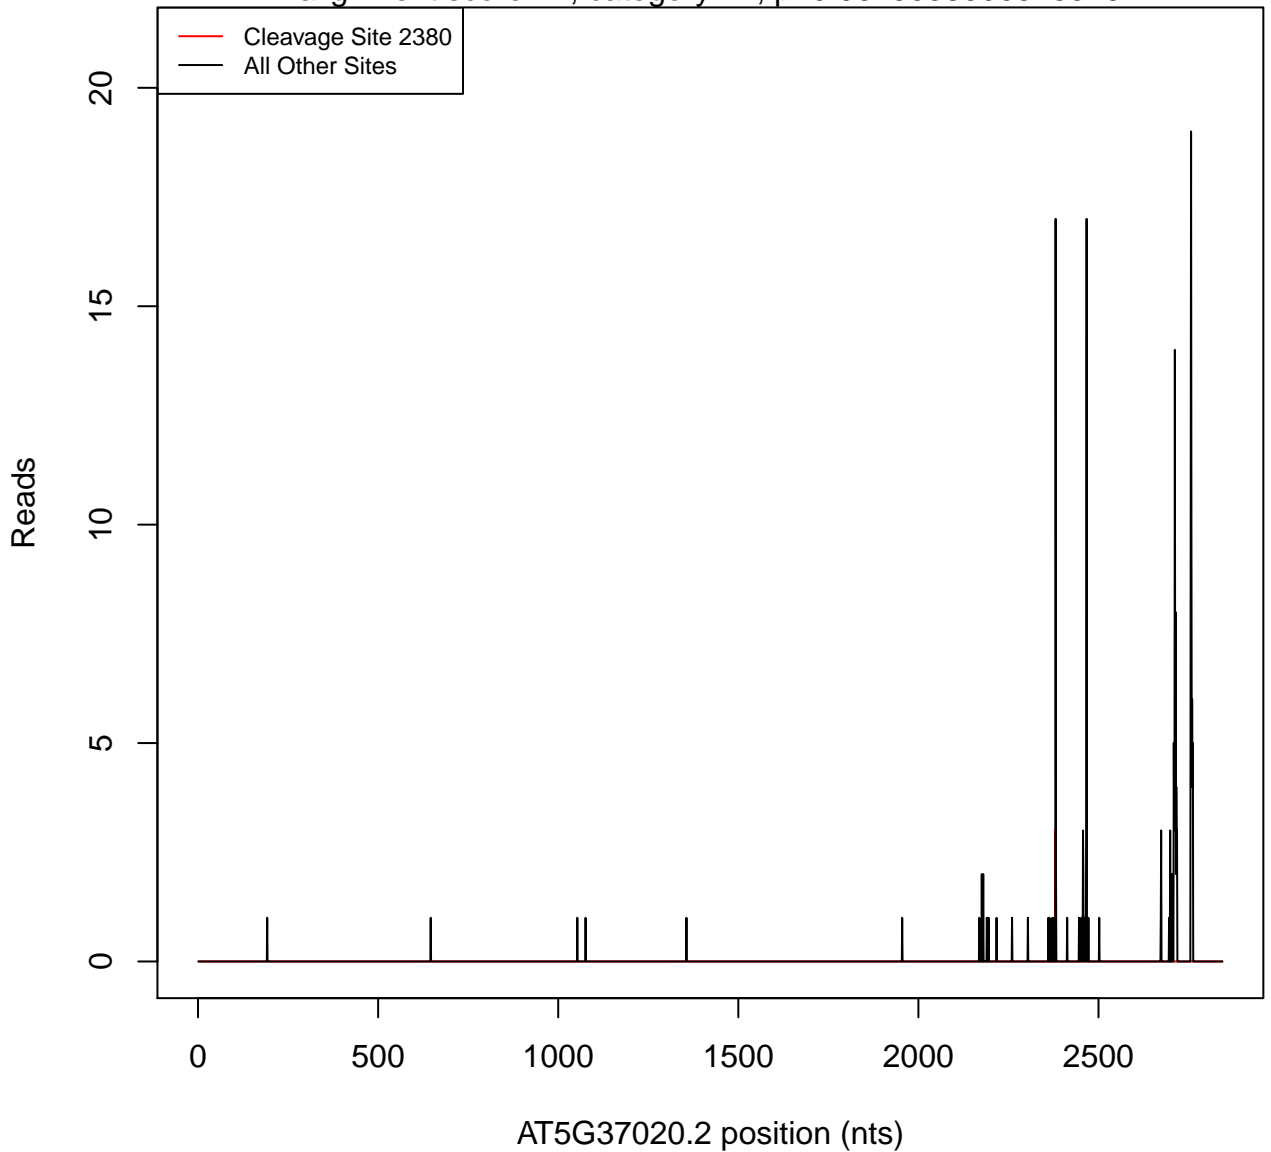

# ath-miR164c slicing AT5G39610.1 at nt 781

alignment score=3.5 , category=4 , p=0.0938043964041548

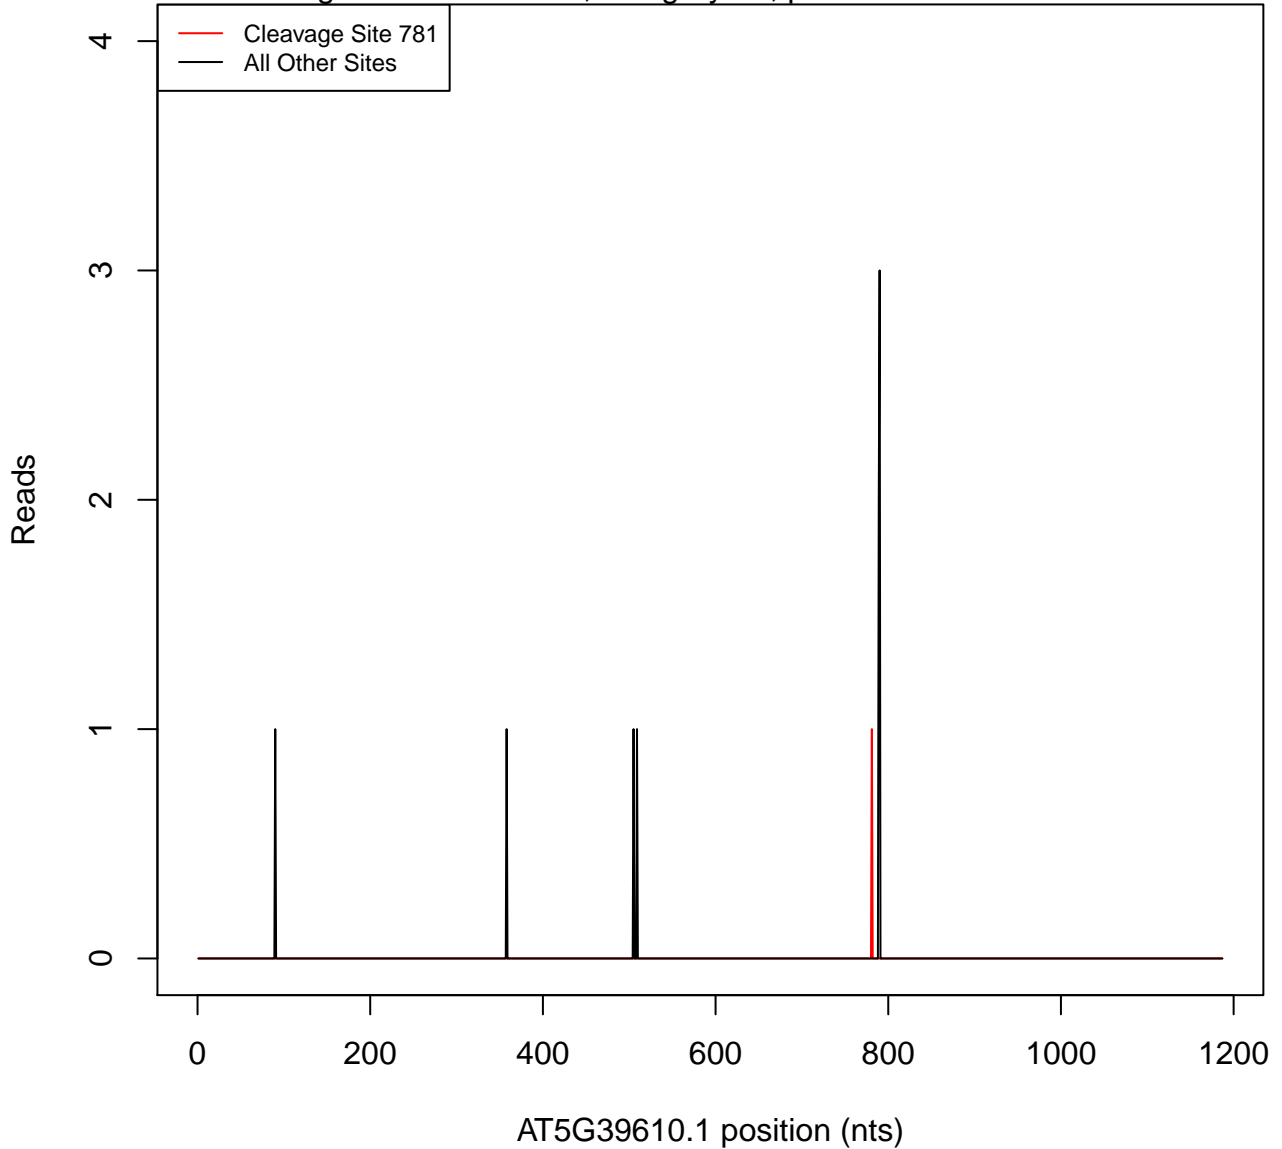

# ath-miR156h\_L+1 slicing AT5G43270.2 at nt 1160

alignment score=2 , category=1 , p=0.0316437211854078

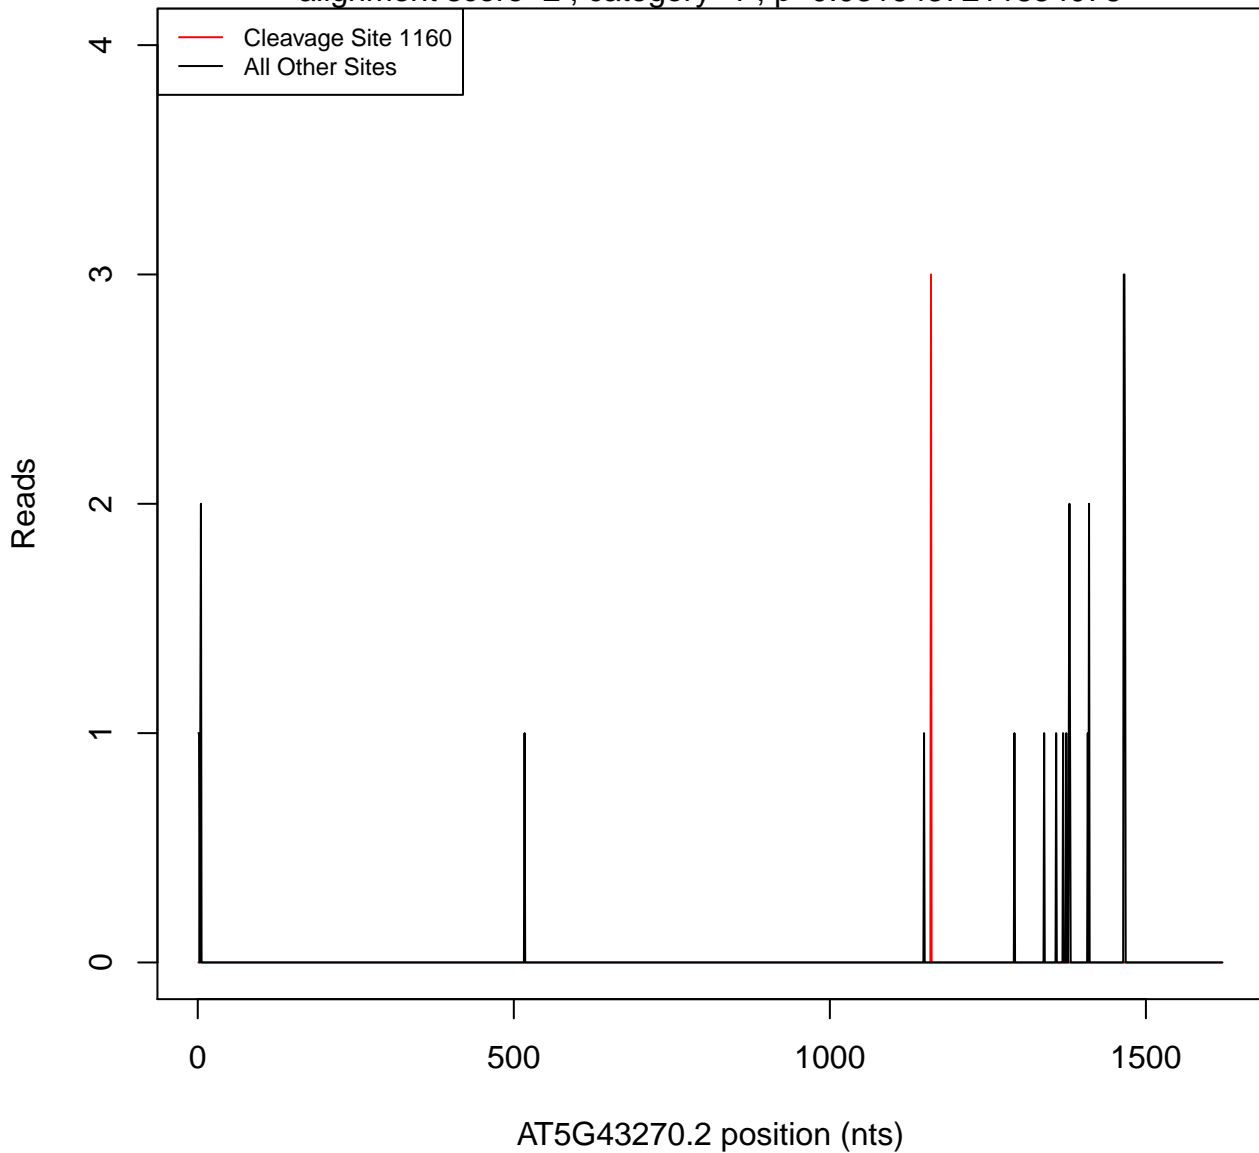

# ath-miR157a slicing AT5G43270.2 at nt 1160

alignment score=2 , category=1 , p=0.0294170441536298

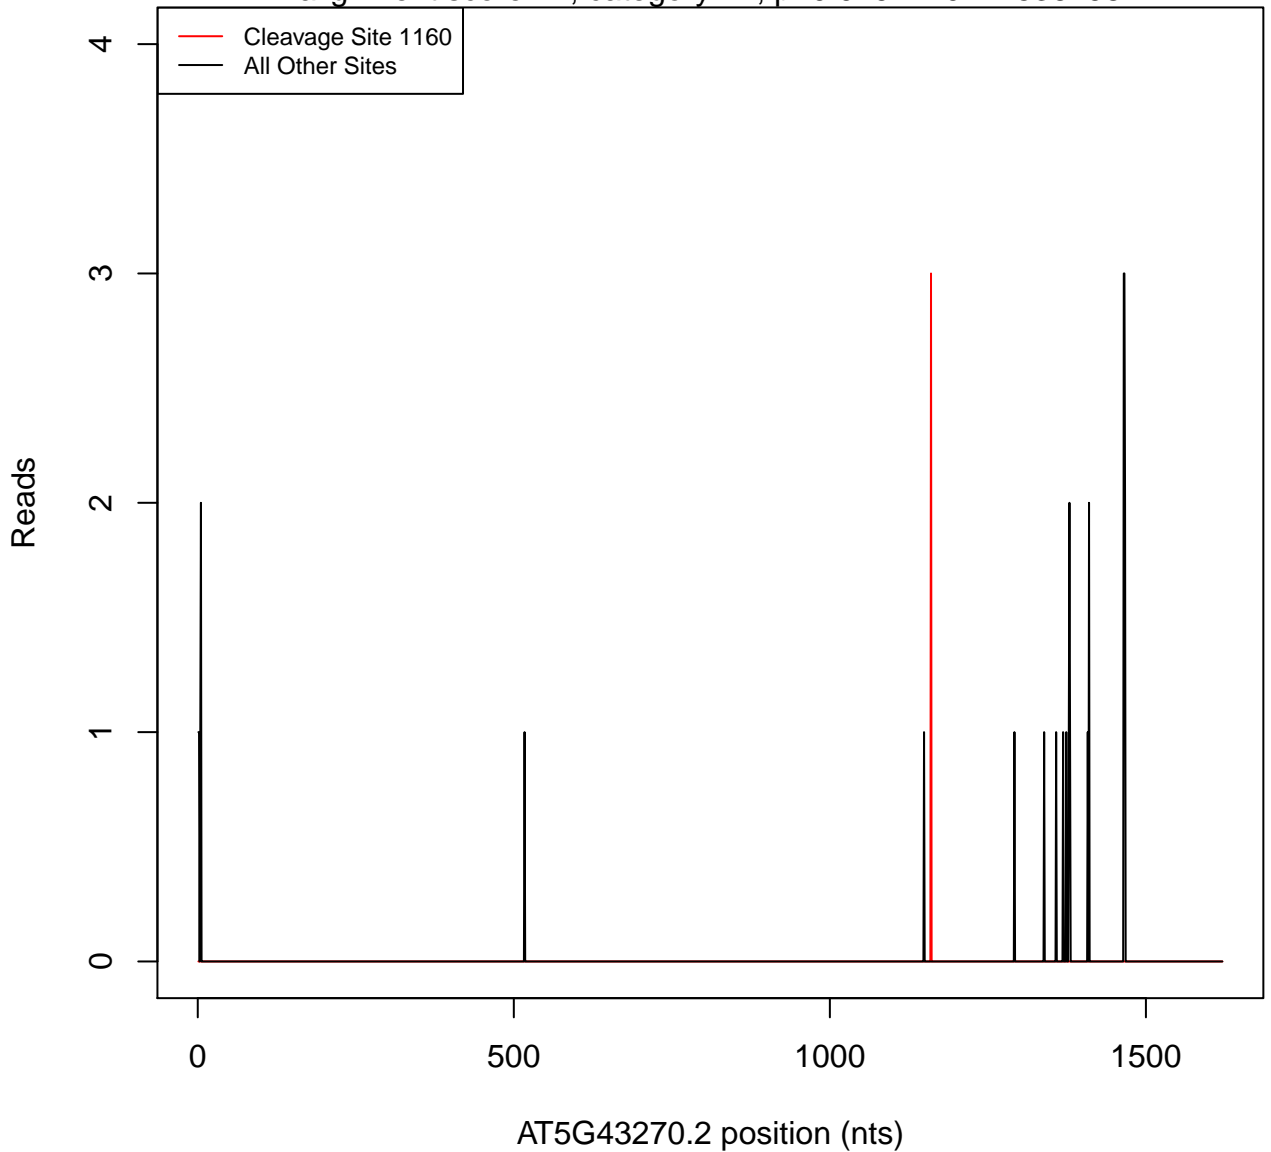



# ath-miR157b slicing AT5G43270.2 at nt 1160

alignment score=2 , category=1 , p=0.0294170441536298

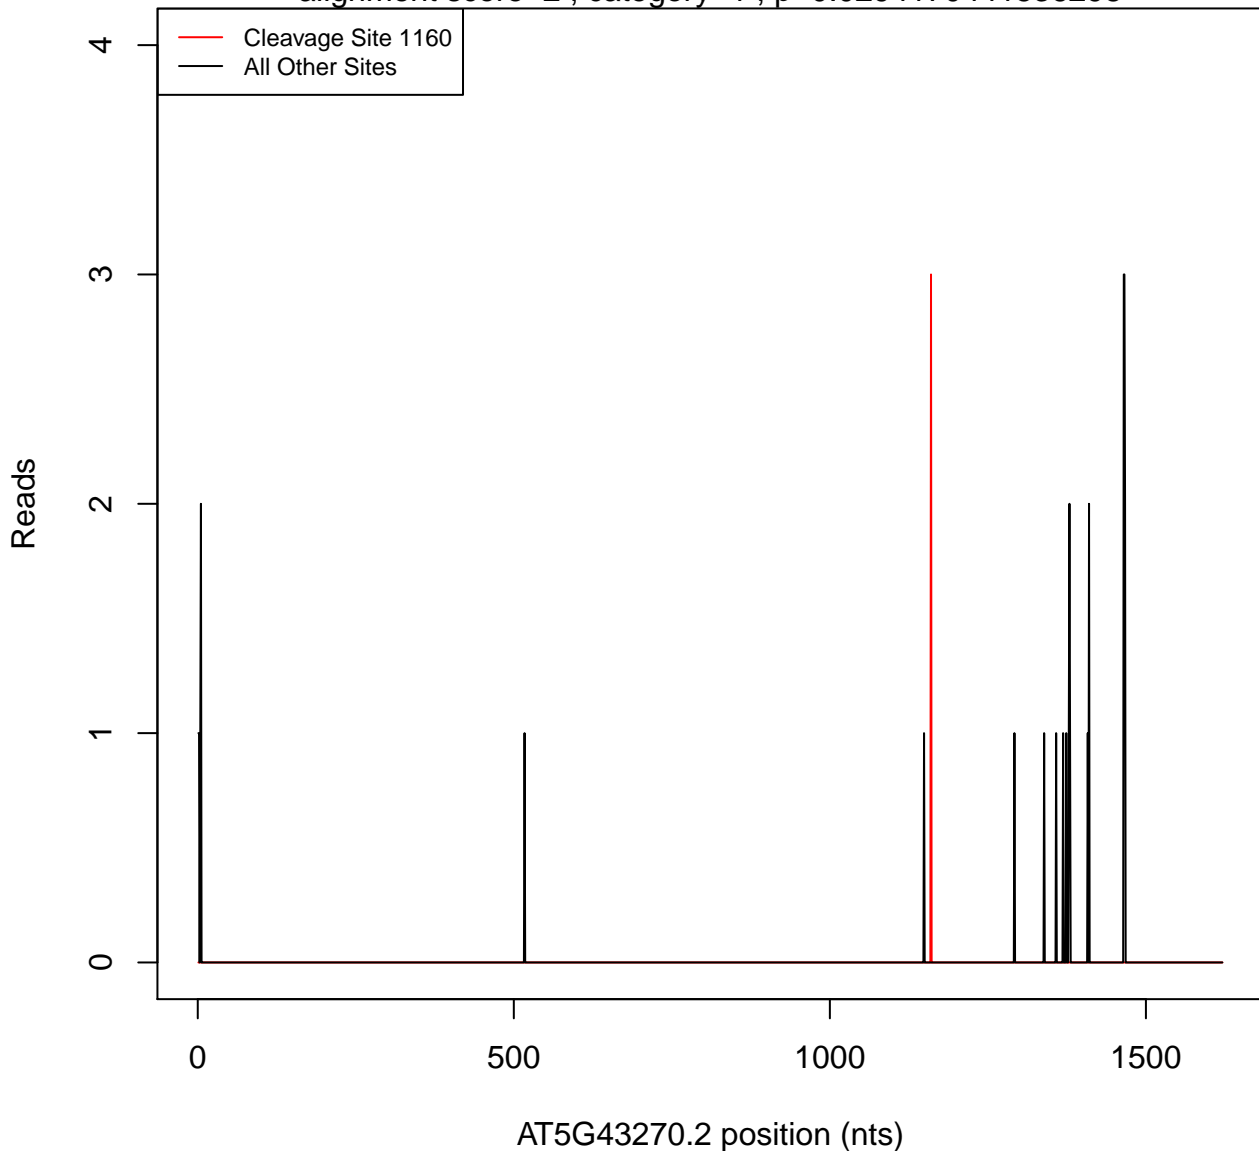

# ath-miR157c slicing AT5G43270.2 at nt 1160

alignment score=2 , category=1 , p=0.0294170441536298



# ath-miR157d\_L+1 slicing AT5G43270.2 at nt 1160

alignment score=2 , category=1 , p=0.0294170441536298

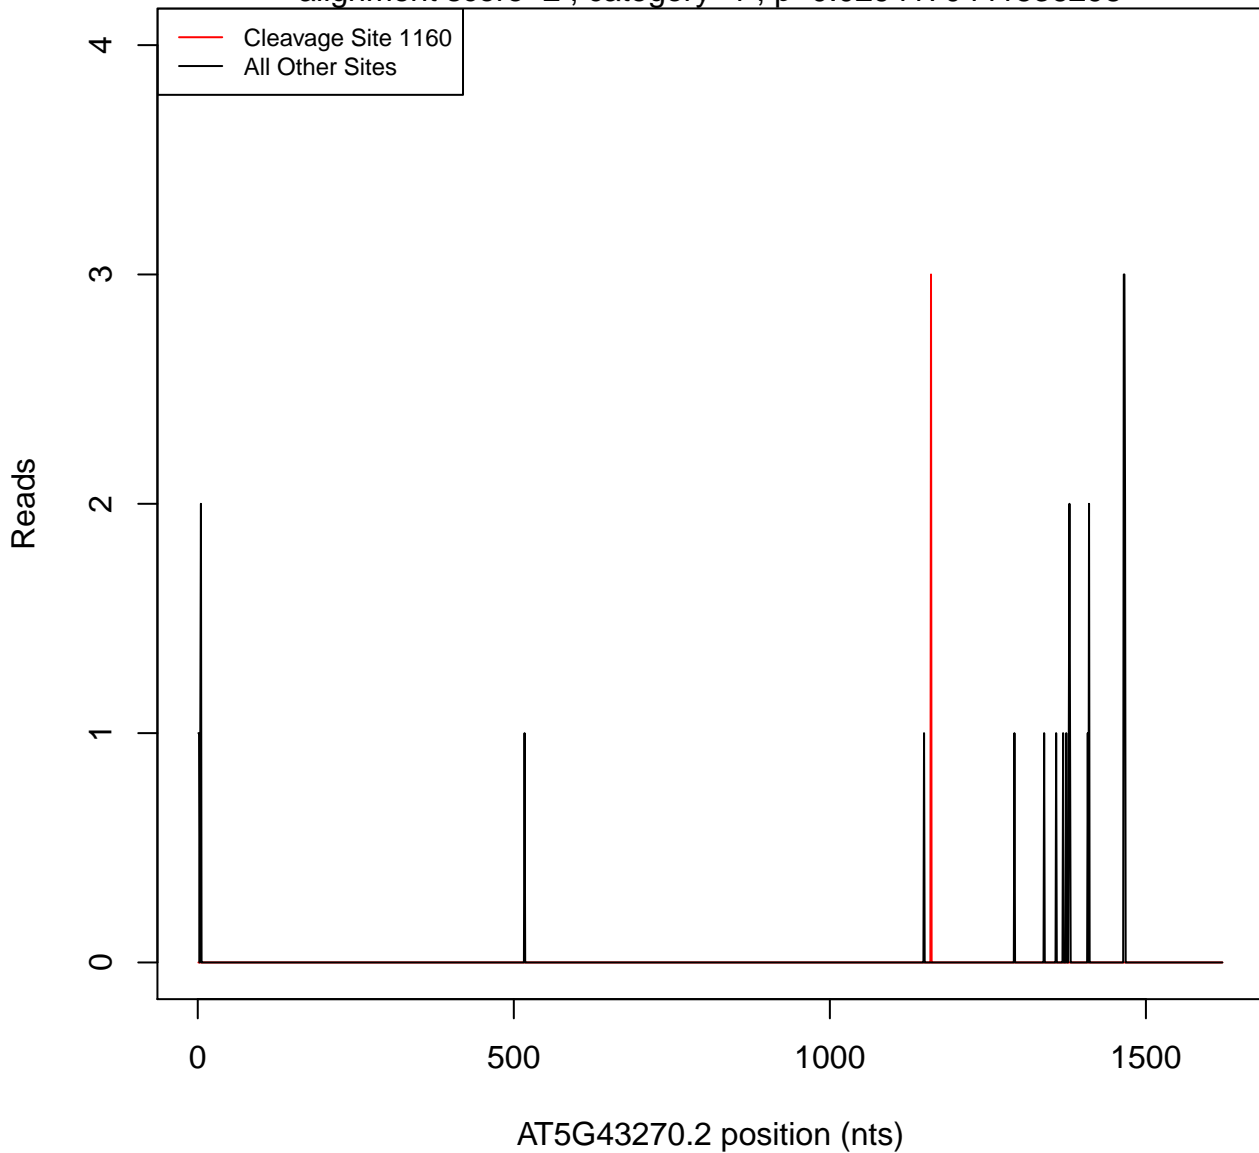

# ath-miR156h\_L+1 slicing AT5G43270.3 at nt 1113

alignment score=2 , category=1 , p=0.0316437211854078

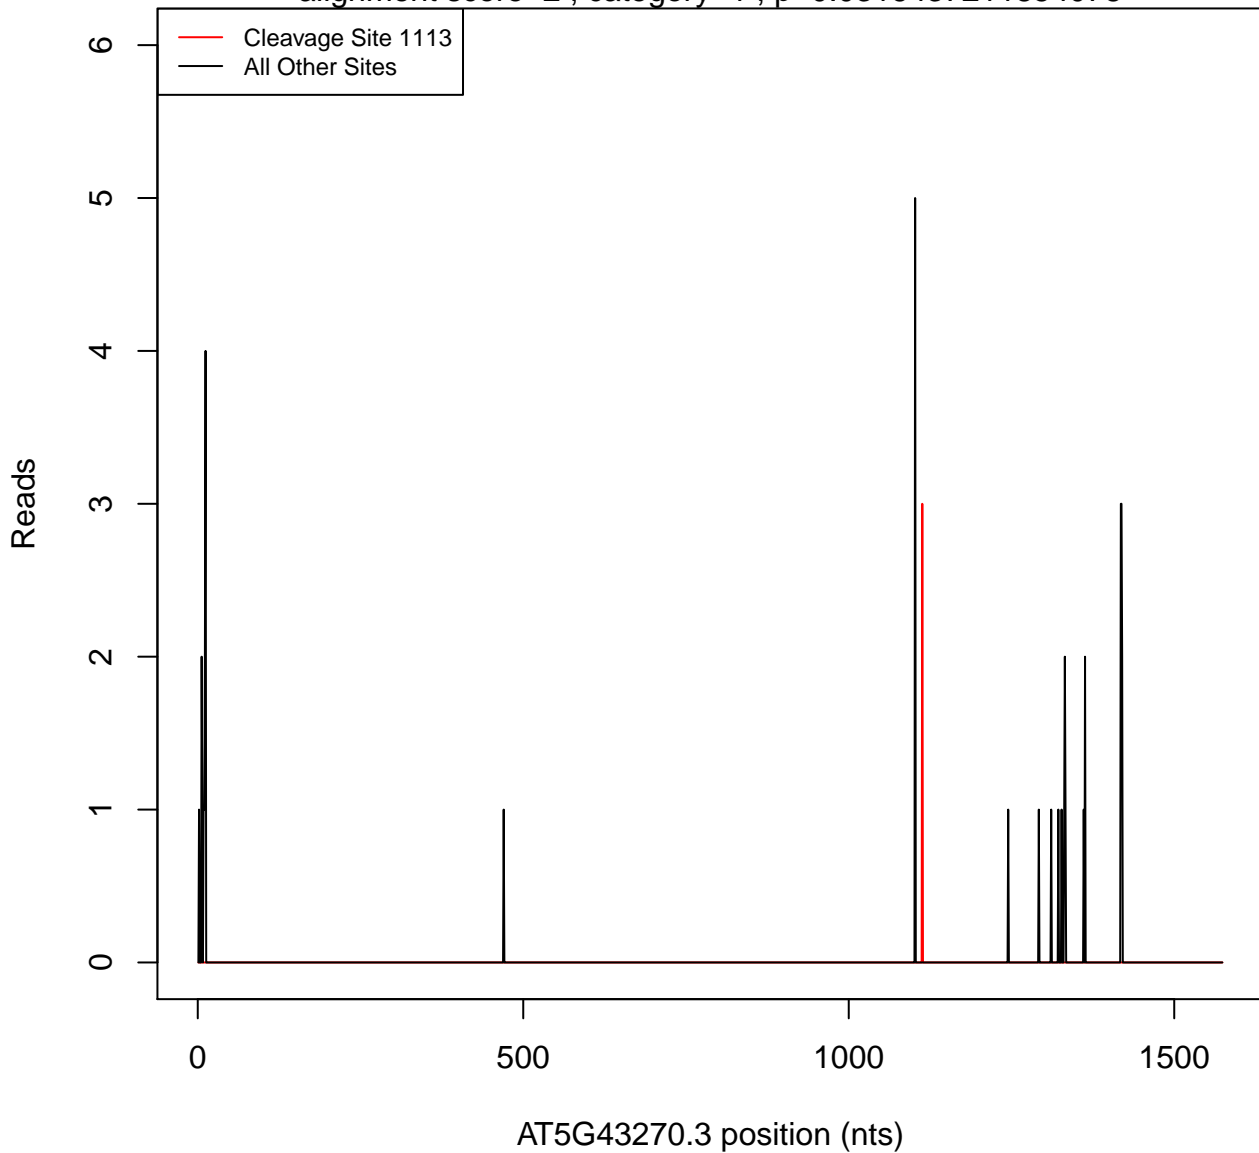

# ath-miR157a slicing AT5G43270.3 at nt 1113

alignment score=2 , category=1 , p=0.0294170441536298

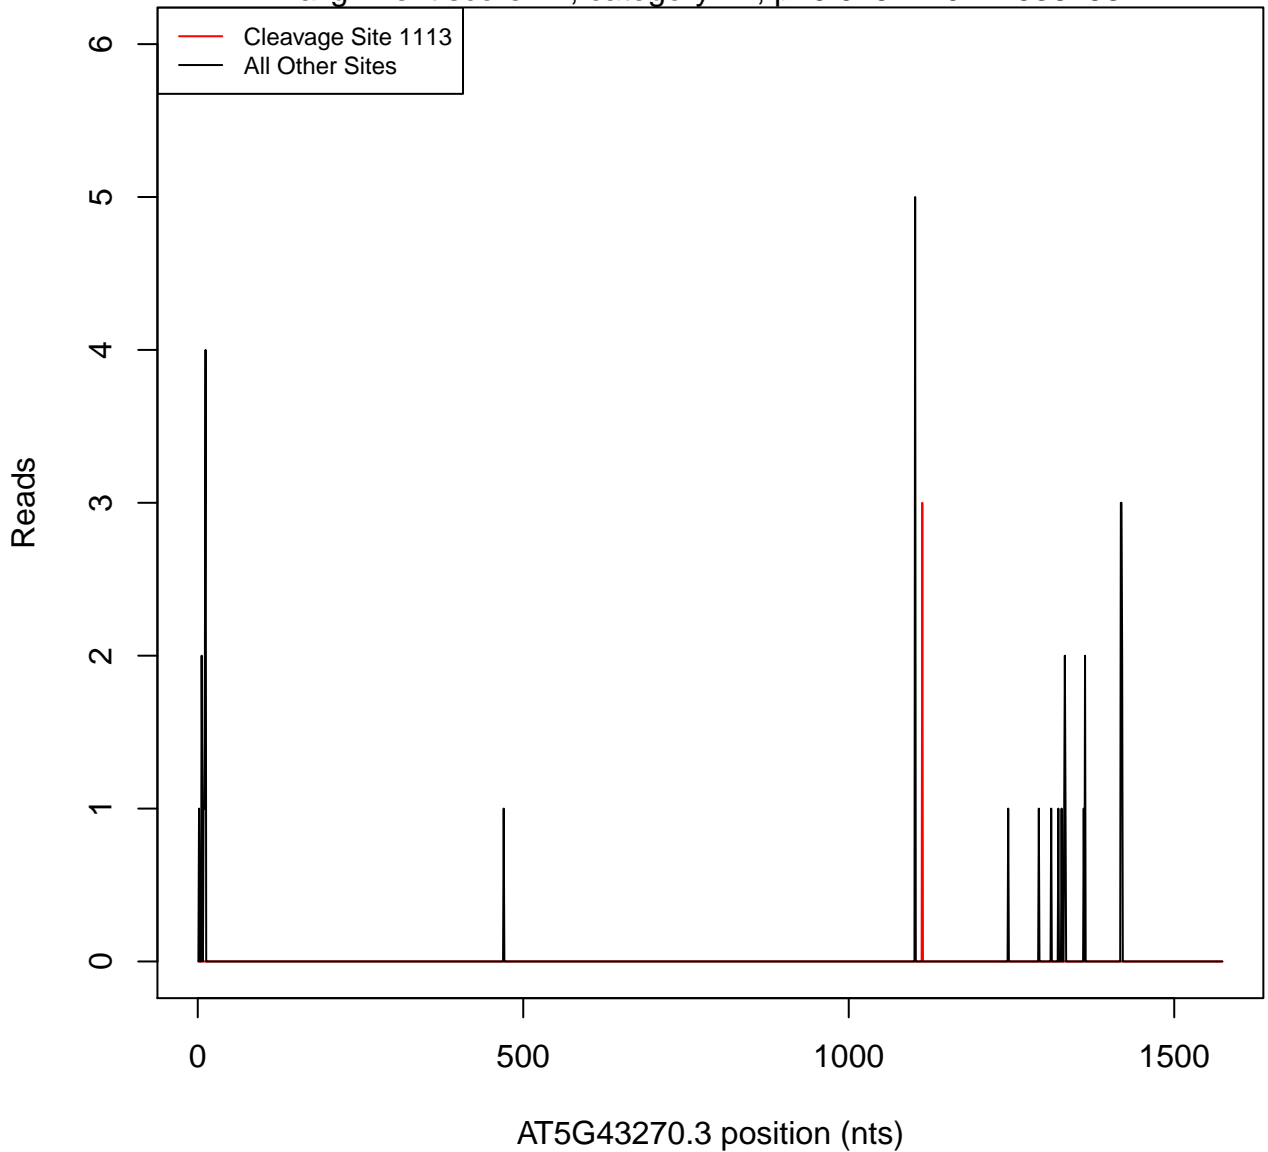

# ath-miR157b slicing AT5G43270.3 at nt 1113

alignment score=2 , category=1 , p=0.0294170441536298

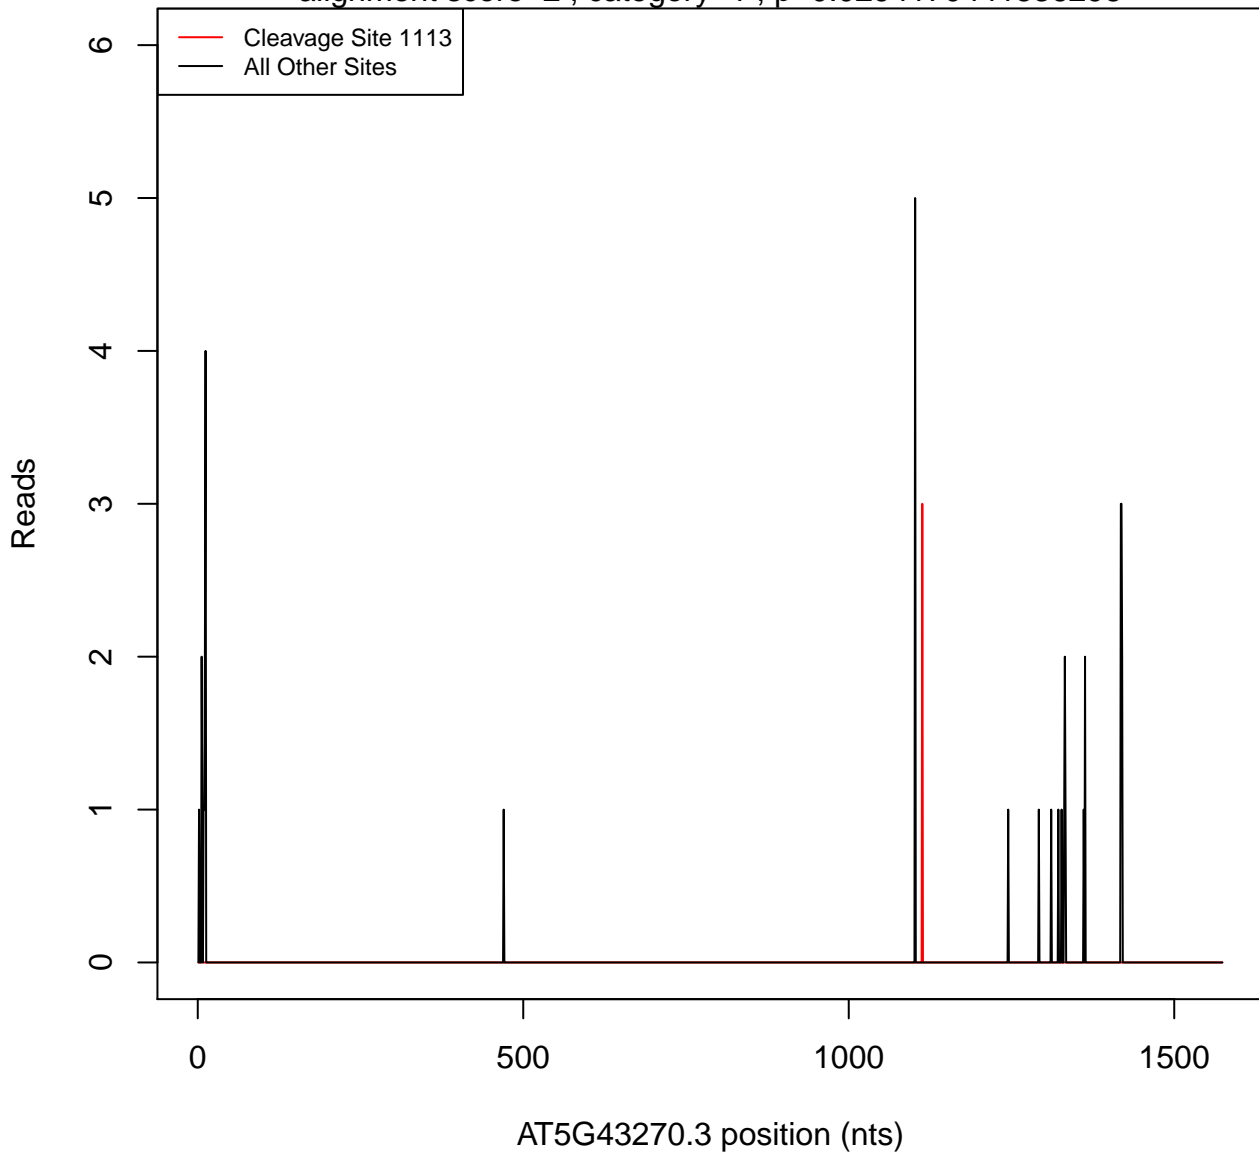

# ath-miR157c slicing AT5G43270.3 at nt 1113

alignment score=2 , category=1 , p=0.0294170441536298

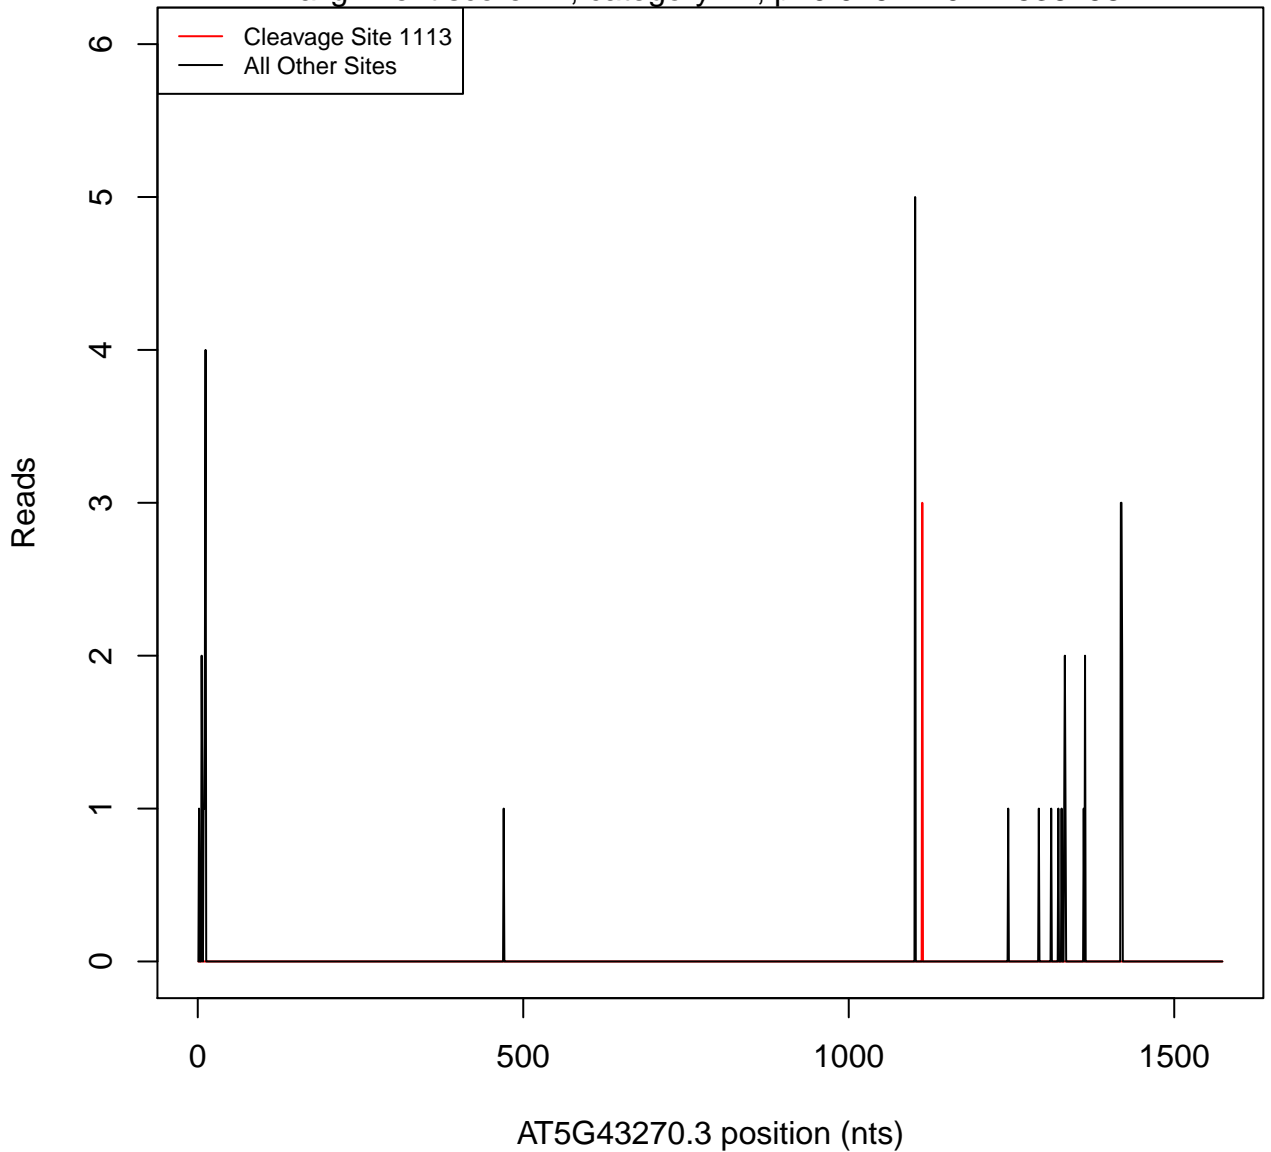

# ath-miR157d\_L+1 slicing AT5G43270.3 at nt 1113

alignment score=2 , category=1 , p=0.0294170441536298

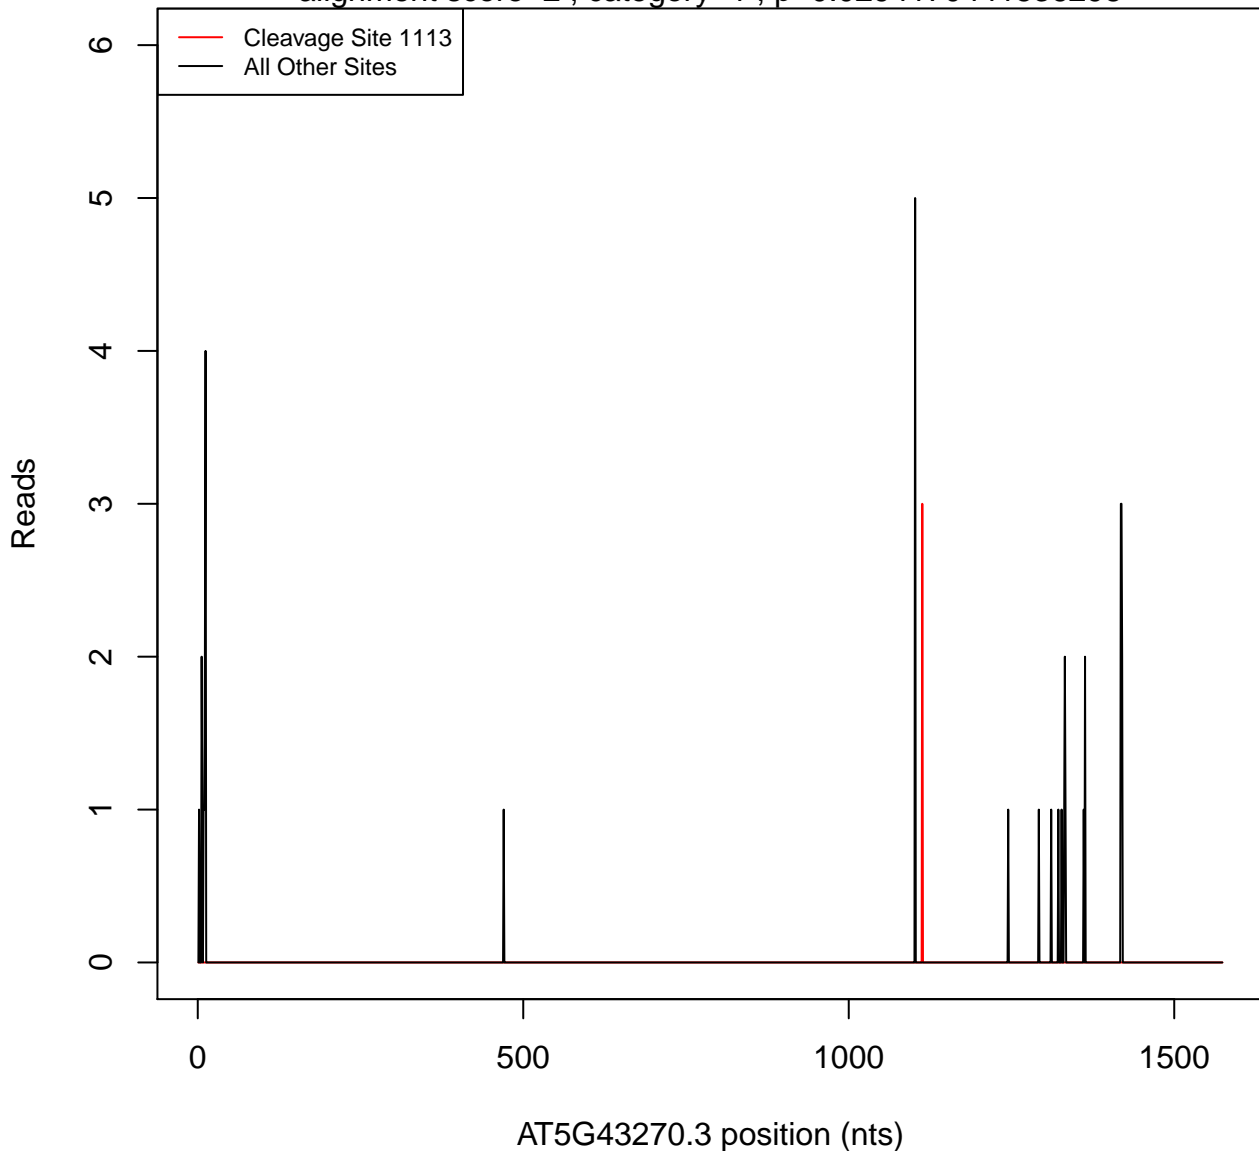



# ath-miR858b slicing AT5G49330.1 at nt 385

alignment score=3 , category=3 , p=0.0369500251341093

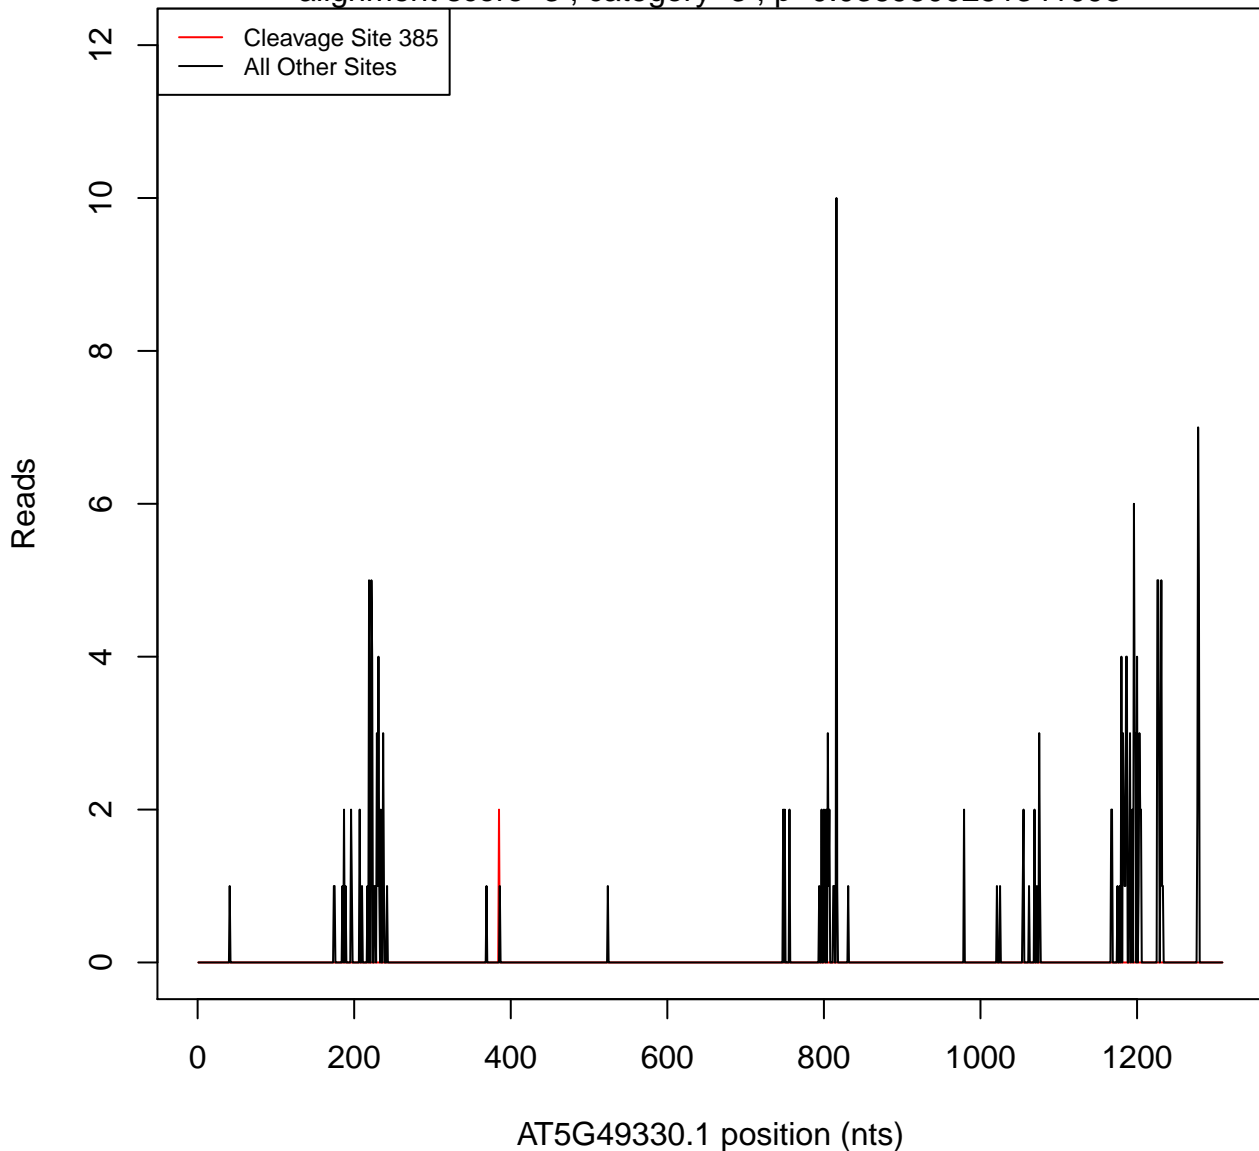

# ath-miR172a slicing AT5G60120.1 at nt 1658

alignment score=1 , category=0 , p=0.00716234853795084

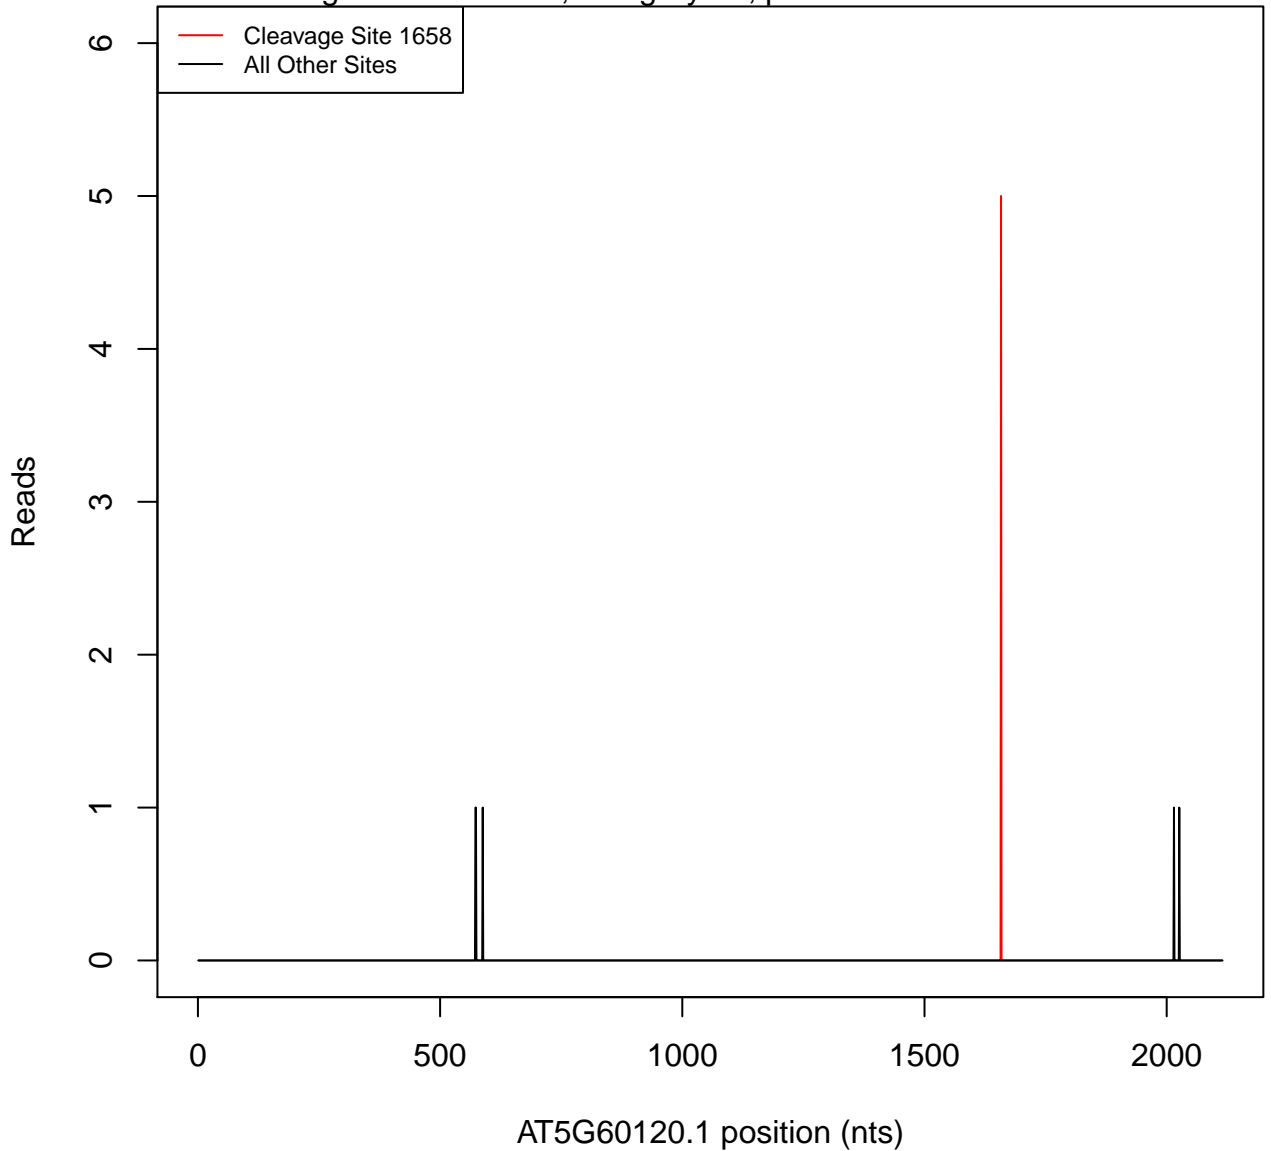

# ath-miR172b slicing AT5G60120.1 at nt 1658

alignment score=1 , category=0 , p=0.00716234853795084

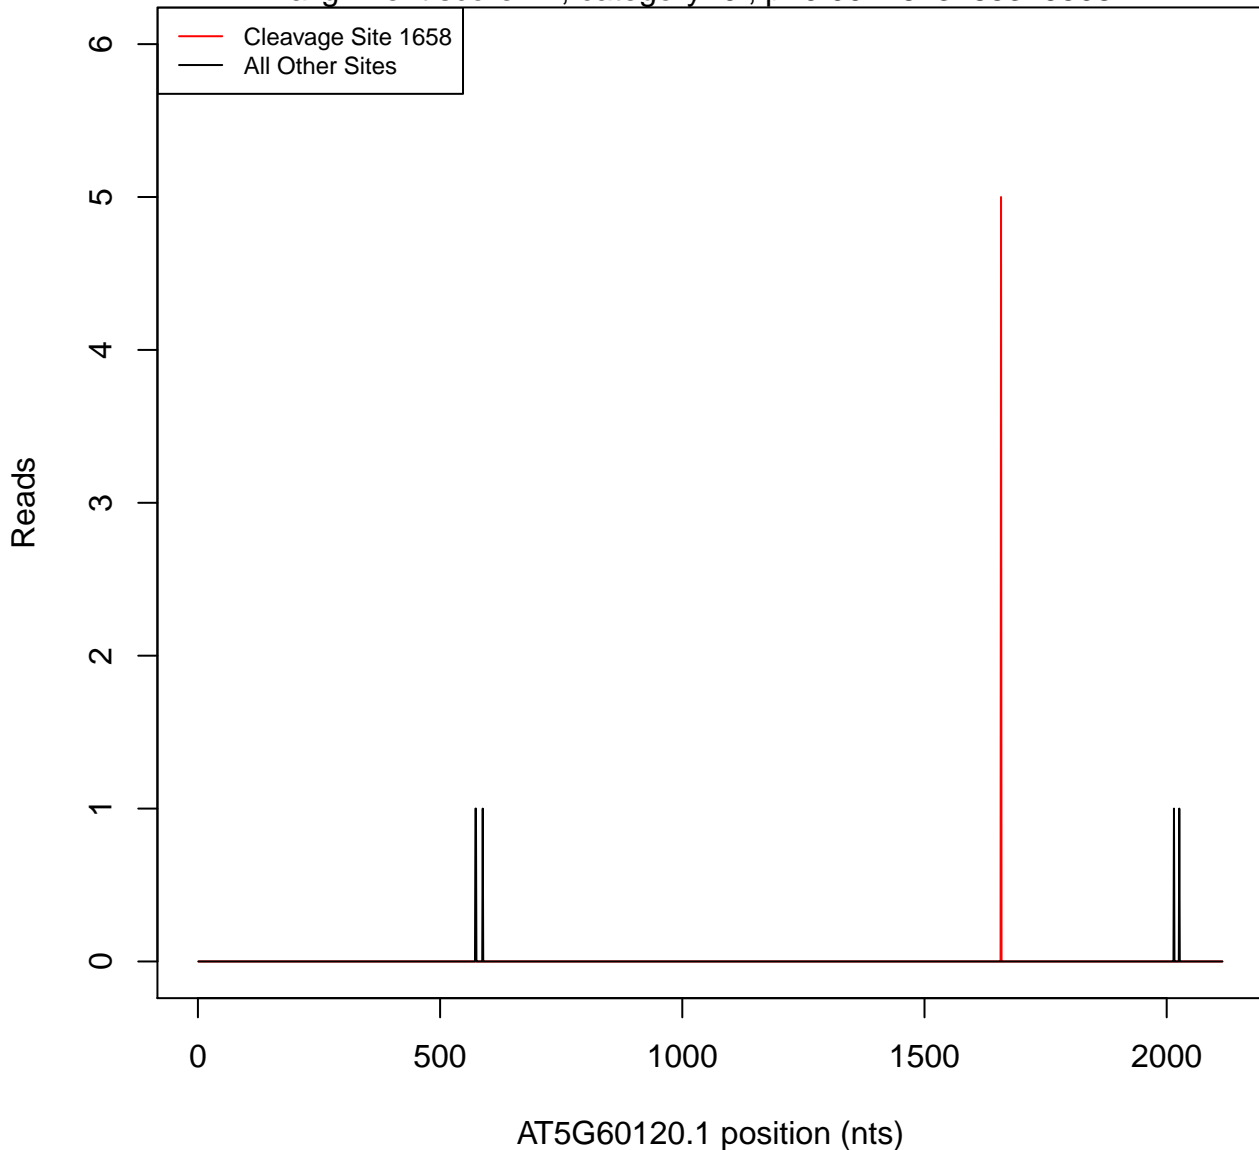

# ath-miR172c slicing AT5G60120.1 at nt 1658

alignment score=2 , category=0 , p=0.0180813050620148

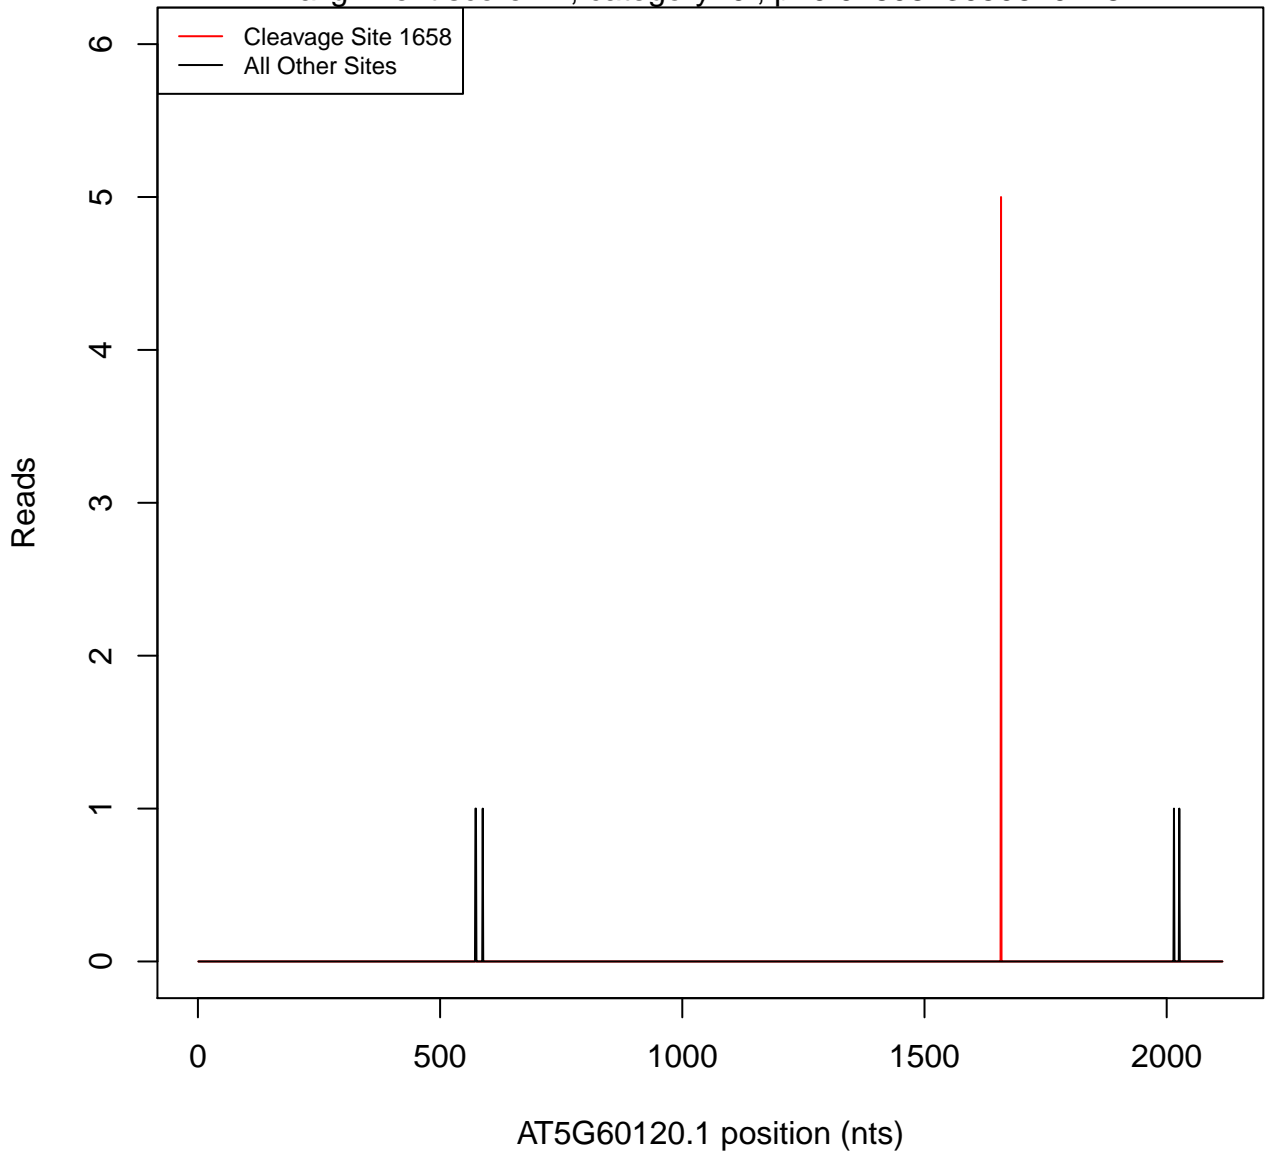

# ath-miR172d slicing AT5G60120.1 at nt 1658

alignment score=2 , category=0 , p=0.0180813050620148

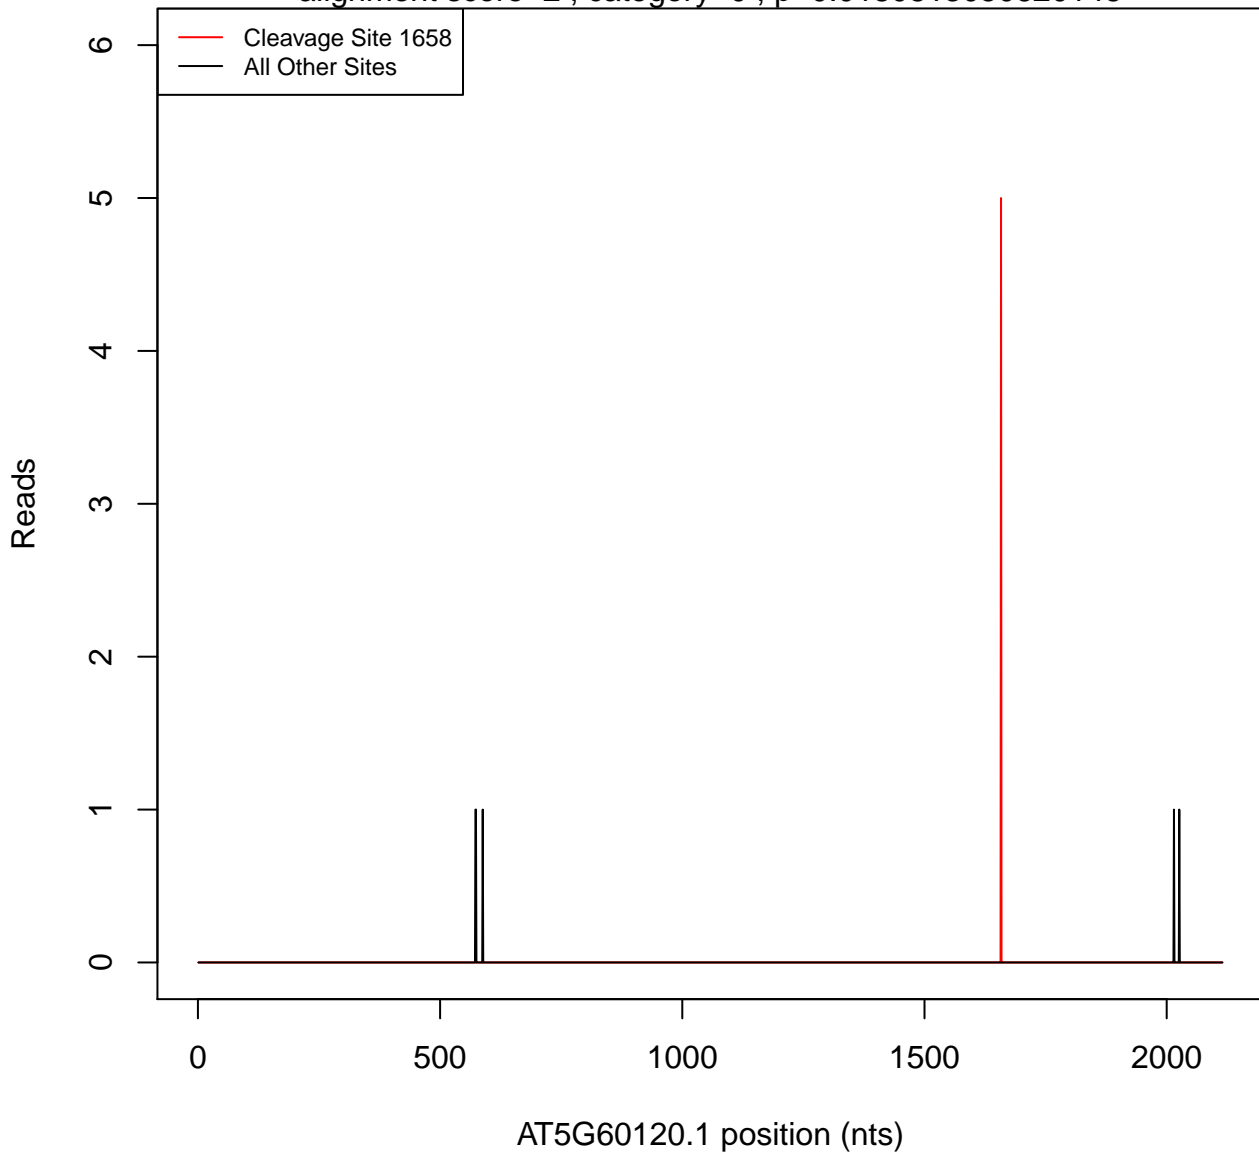

# ath-miR172e slicing AT5G60120.1 at nt 1658

alignment score=1.5 , category=0 , p=0.0066132246252576

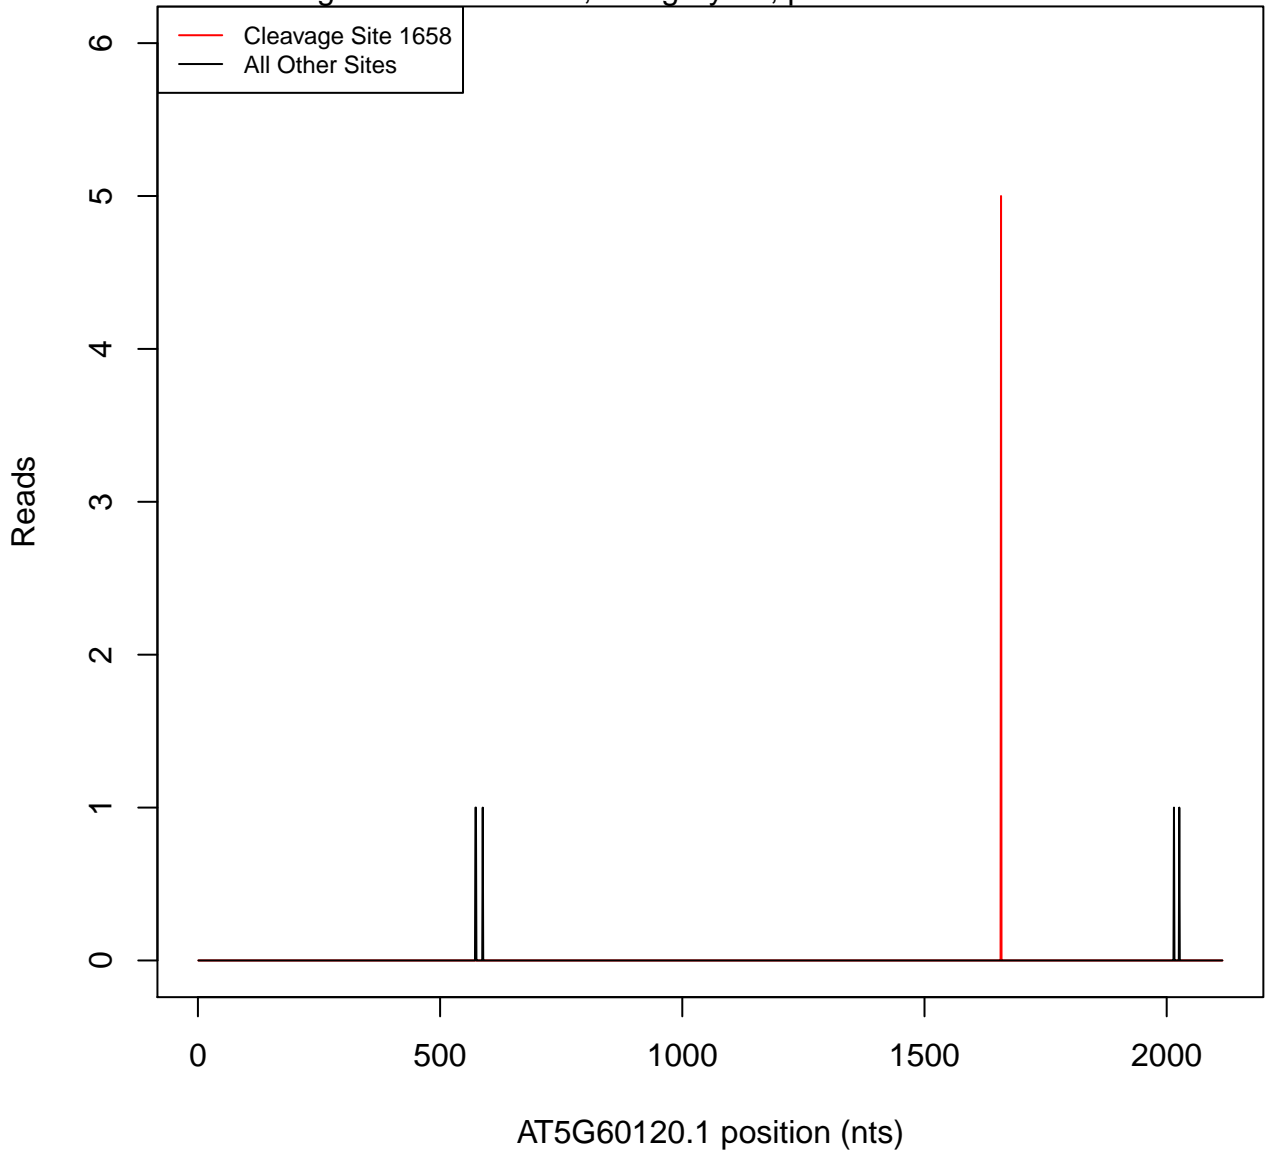

# ath-miR172a slicing AT5G60120.2 at nt 1821

alignment score=1 , category=0 , p=0.00716234853795084

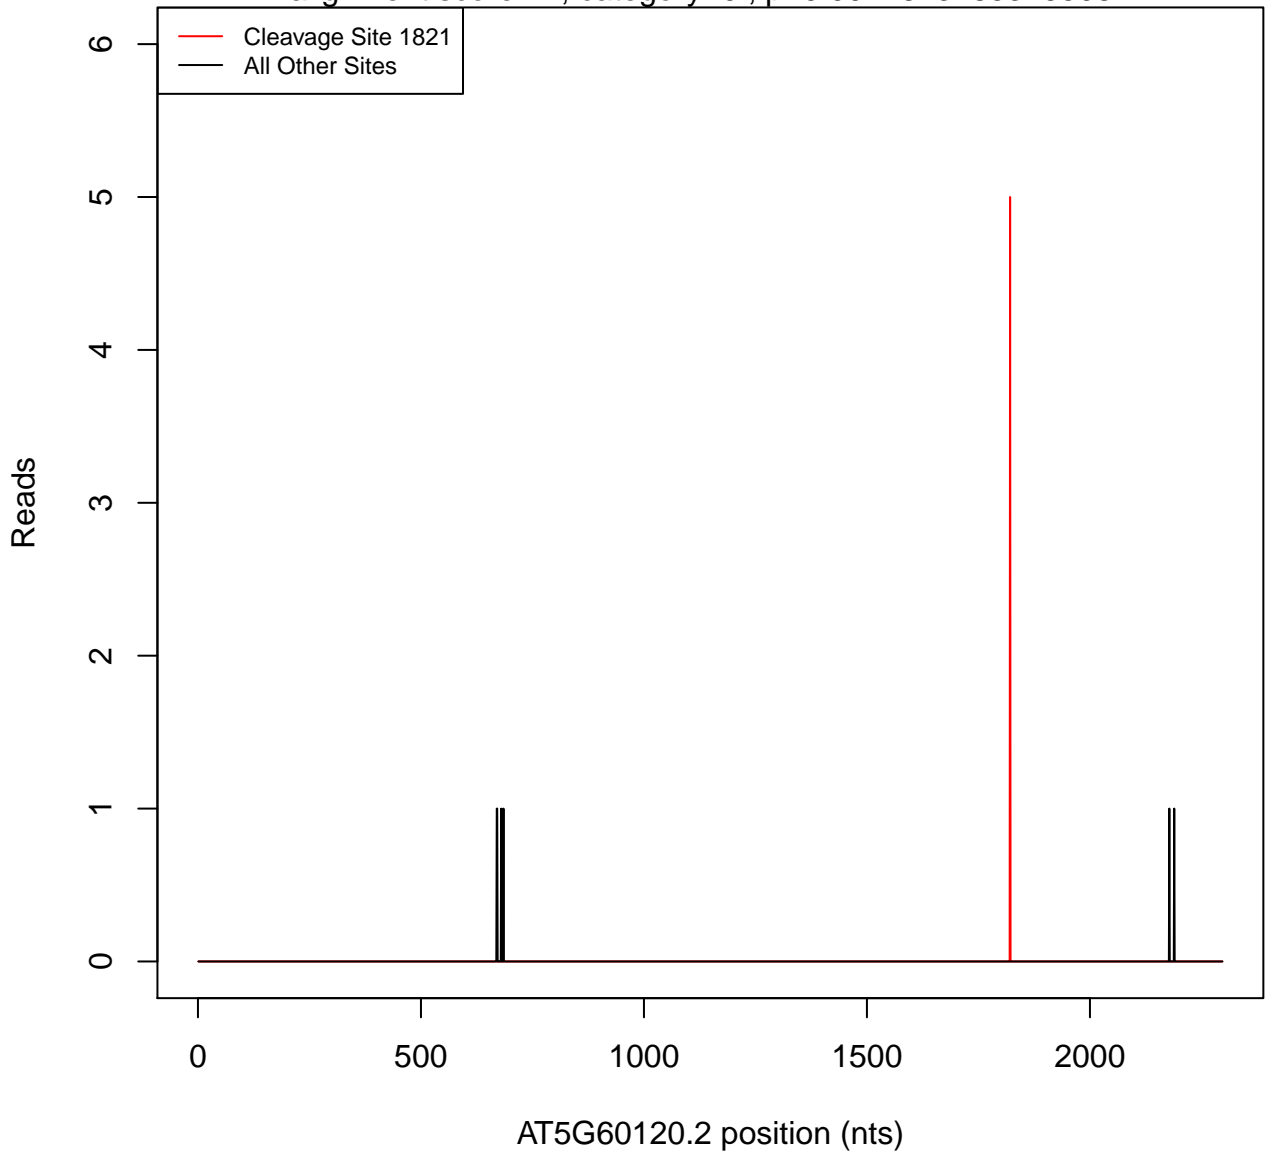

# ath-miR172b slicing AT5G60120.2 at nt 1821

alignment score=1 , category=0 , p=0.00716234853795084

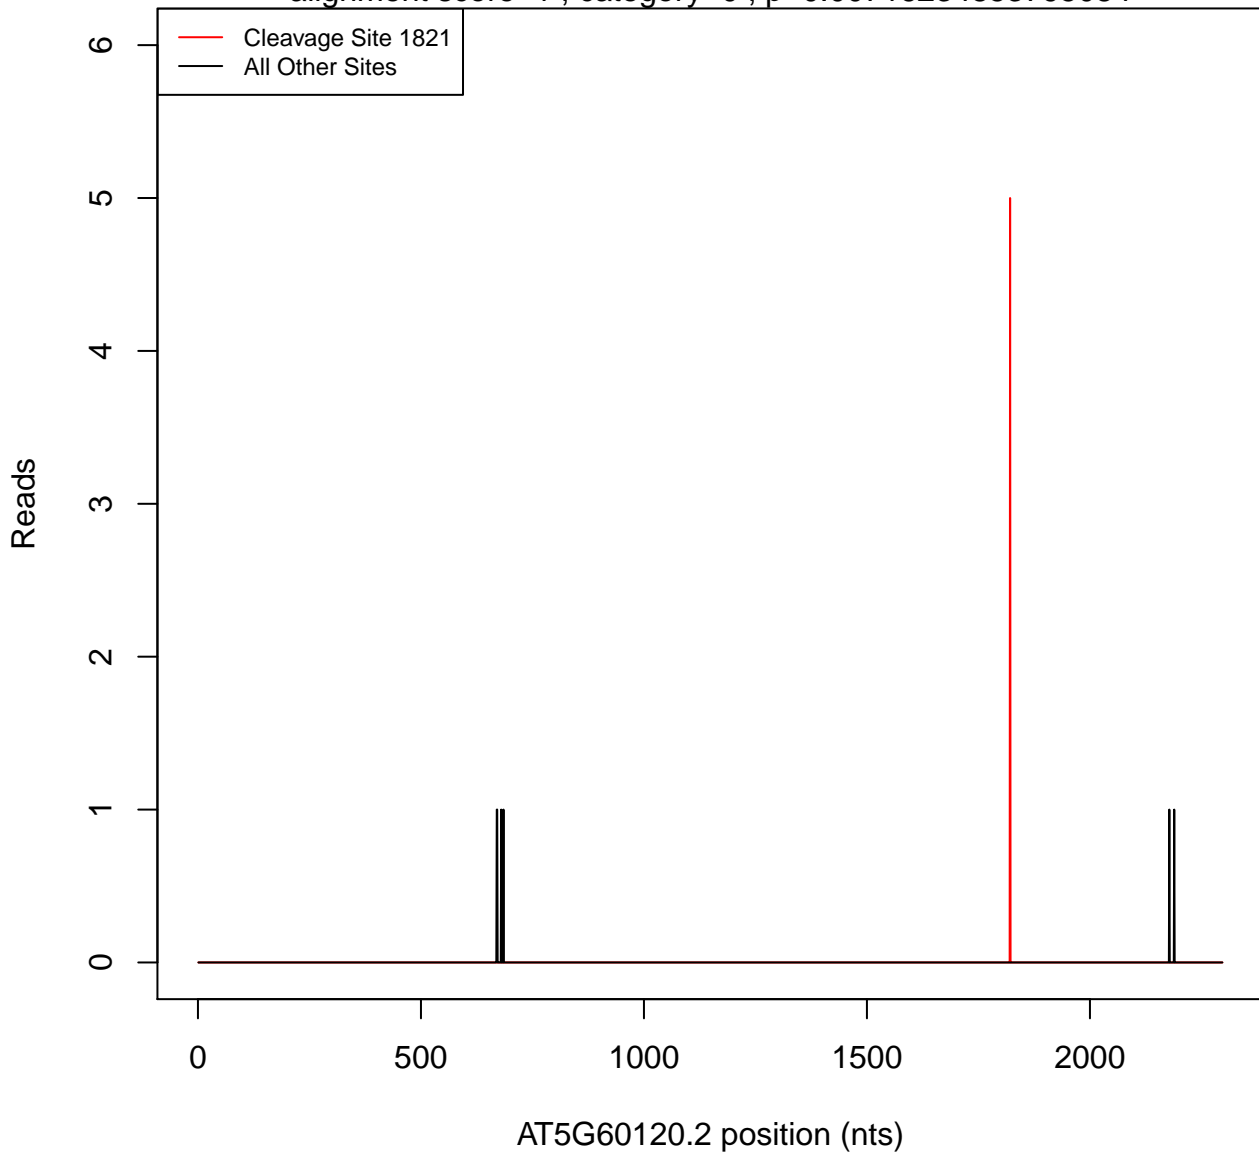



# ath-miR172c slicing AT5G60120.2 at nt 1821

alignment score=2 , category=0 , p=0.0180813050620148

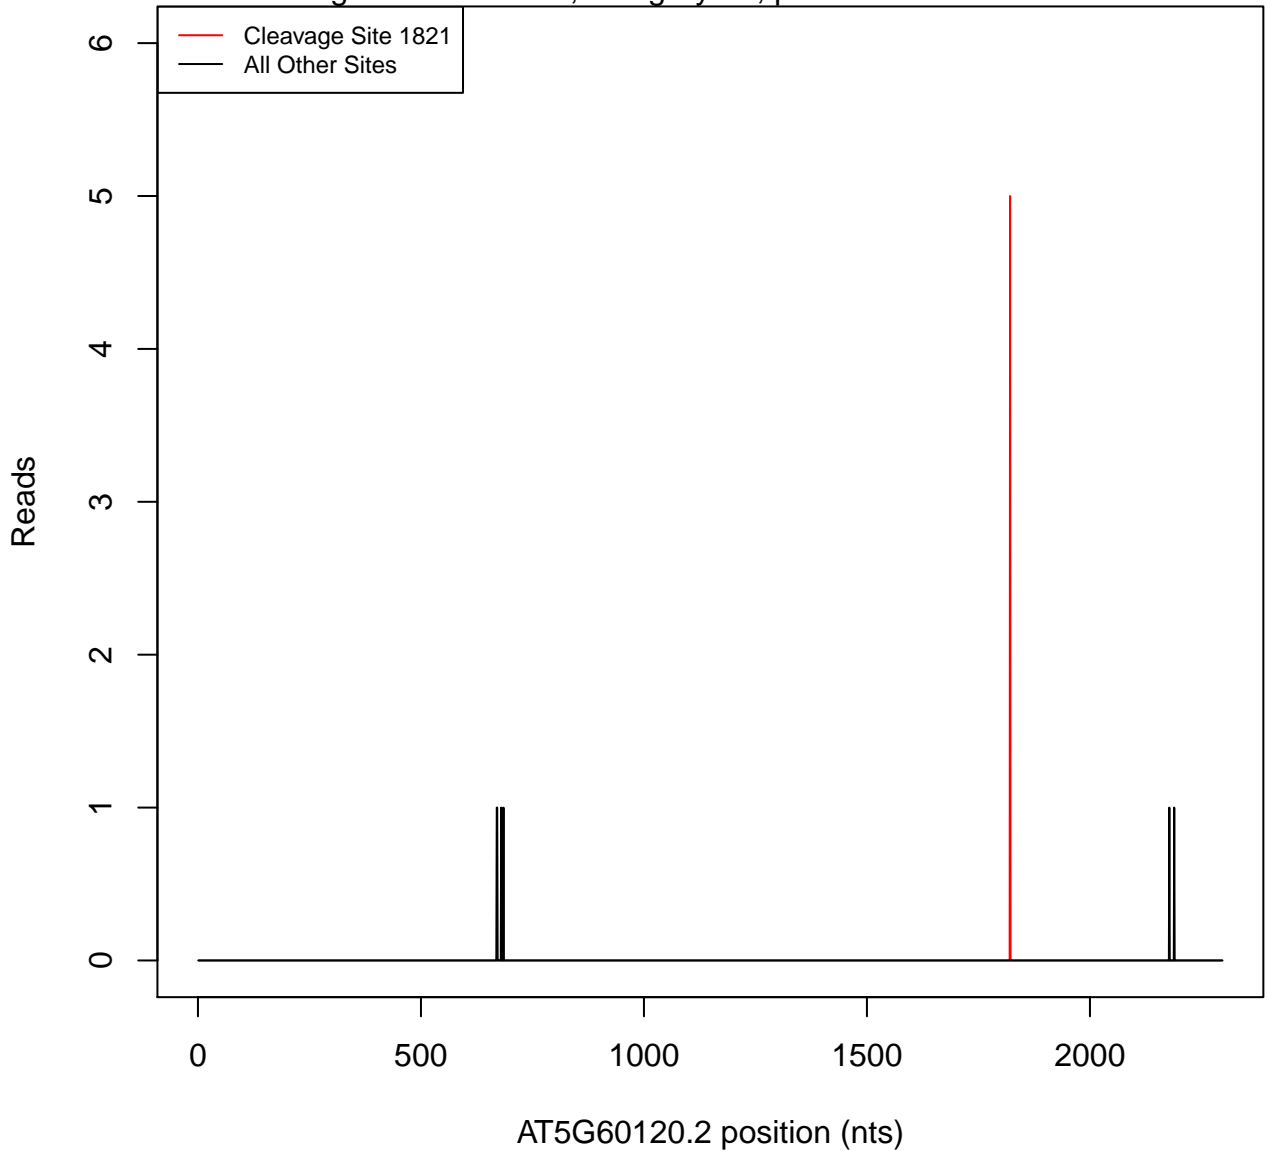

# ath-miR172d slicing AT5G60120.2 at nt 1821

alignment score=2 , category=0 , p=0.0180813050620148

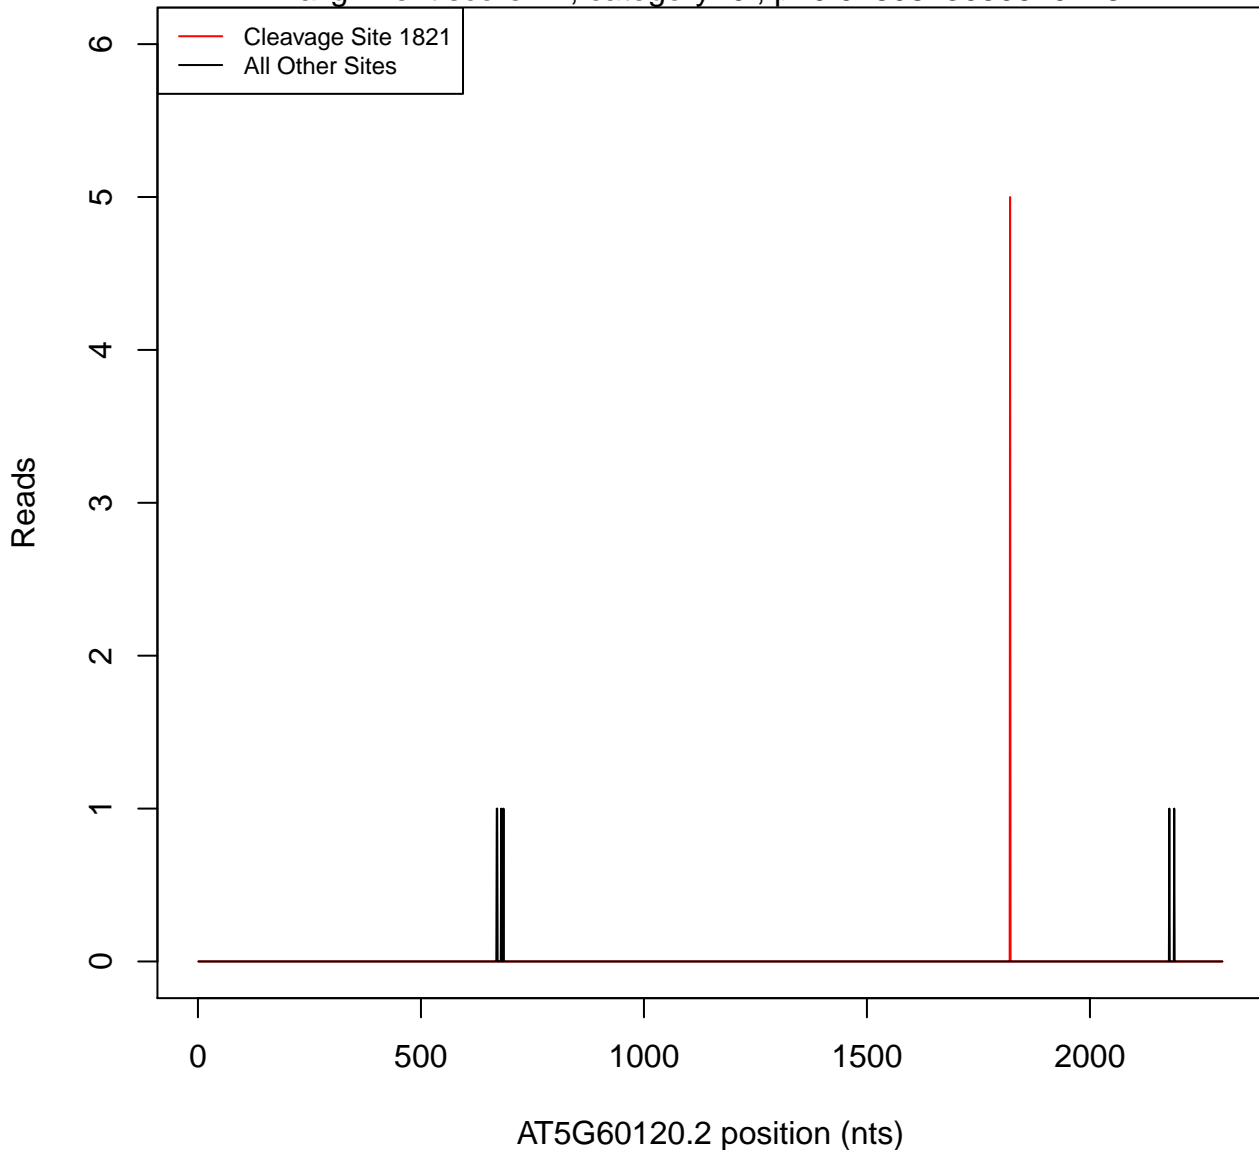

# ath-miR172e slicing AT5G60120.2 at nt 1821

alignment score=1.5 , category=0 , p=0.0066132246252576

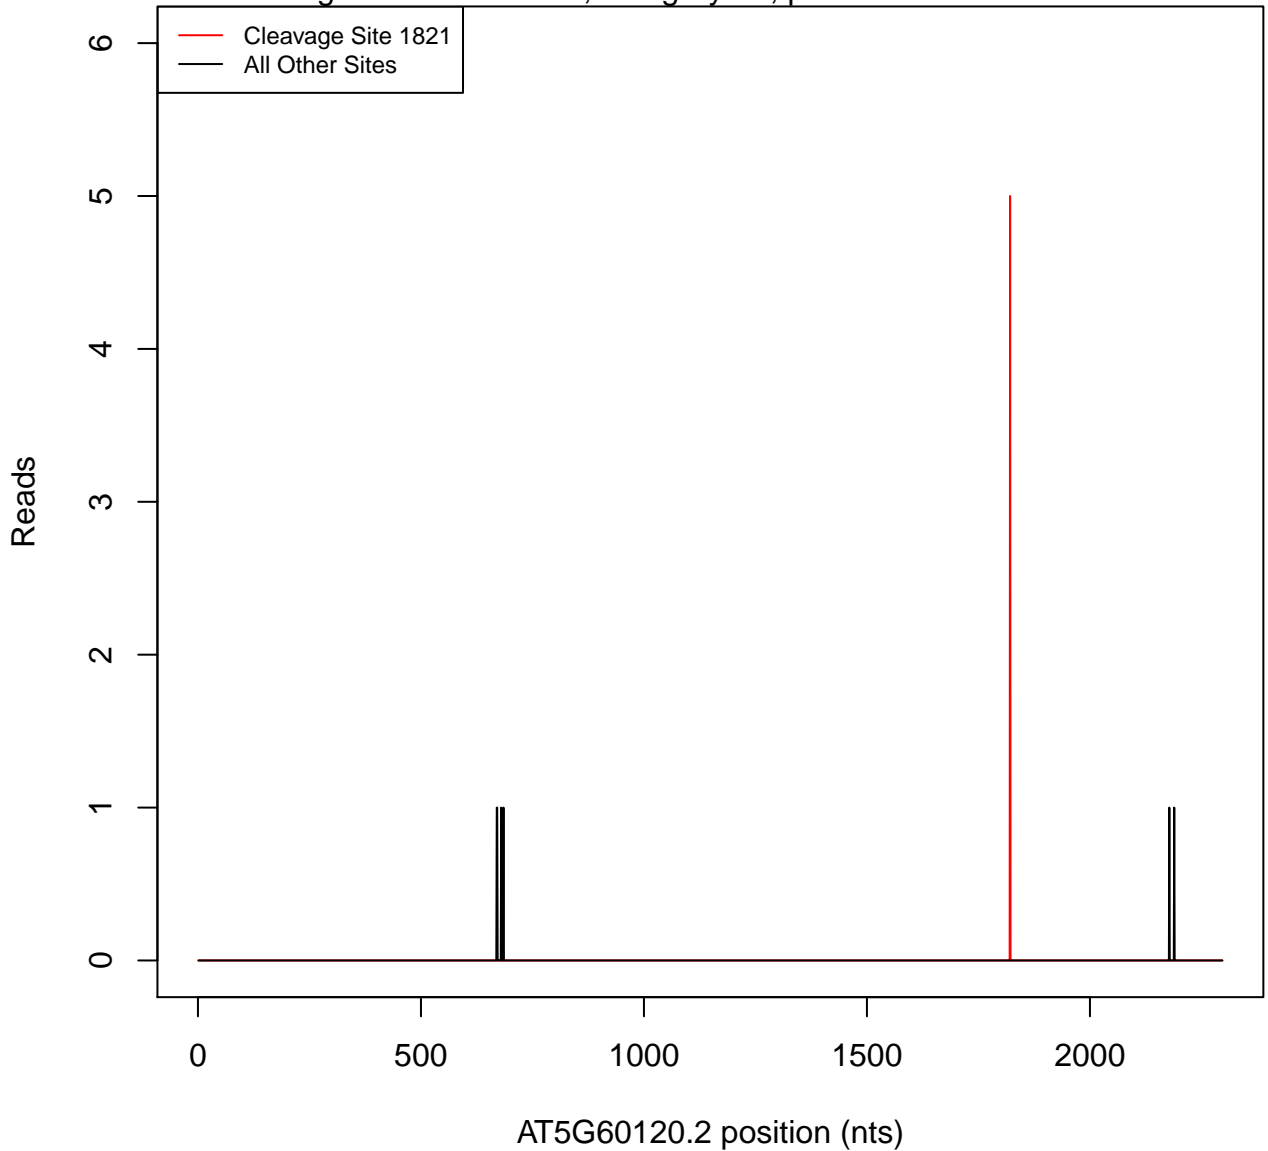

# PC-3p-41 slicing AT5G60390.1 at nt 1158

alignment score=3.5 , category=3 , p=0.0894501223743839

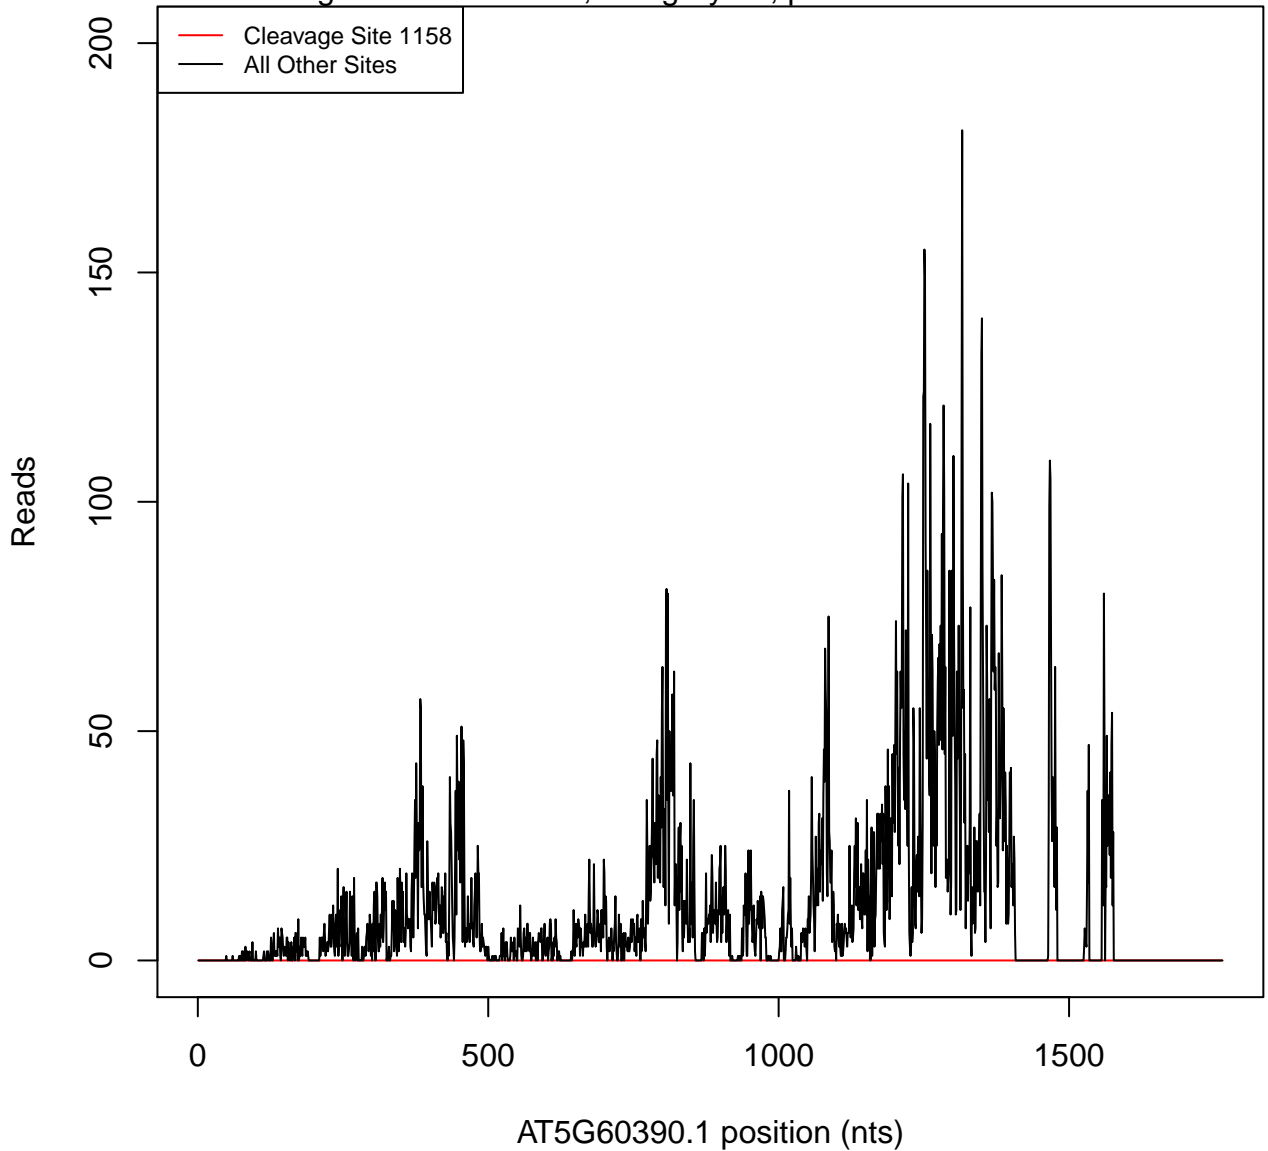

# PC-3p-41 slicing AT5G60390.2 at nt 1158

alignment score=3.5 , category=3 , p=0.0894501223743839

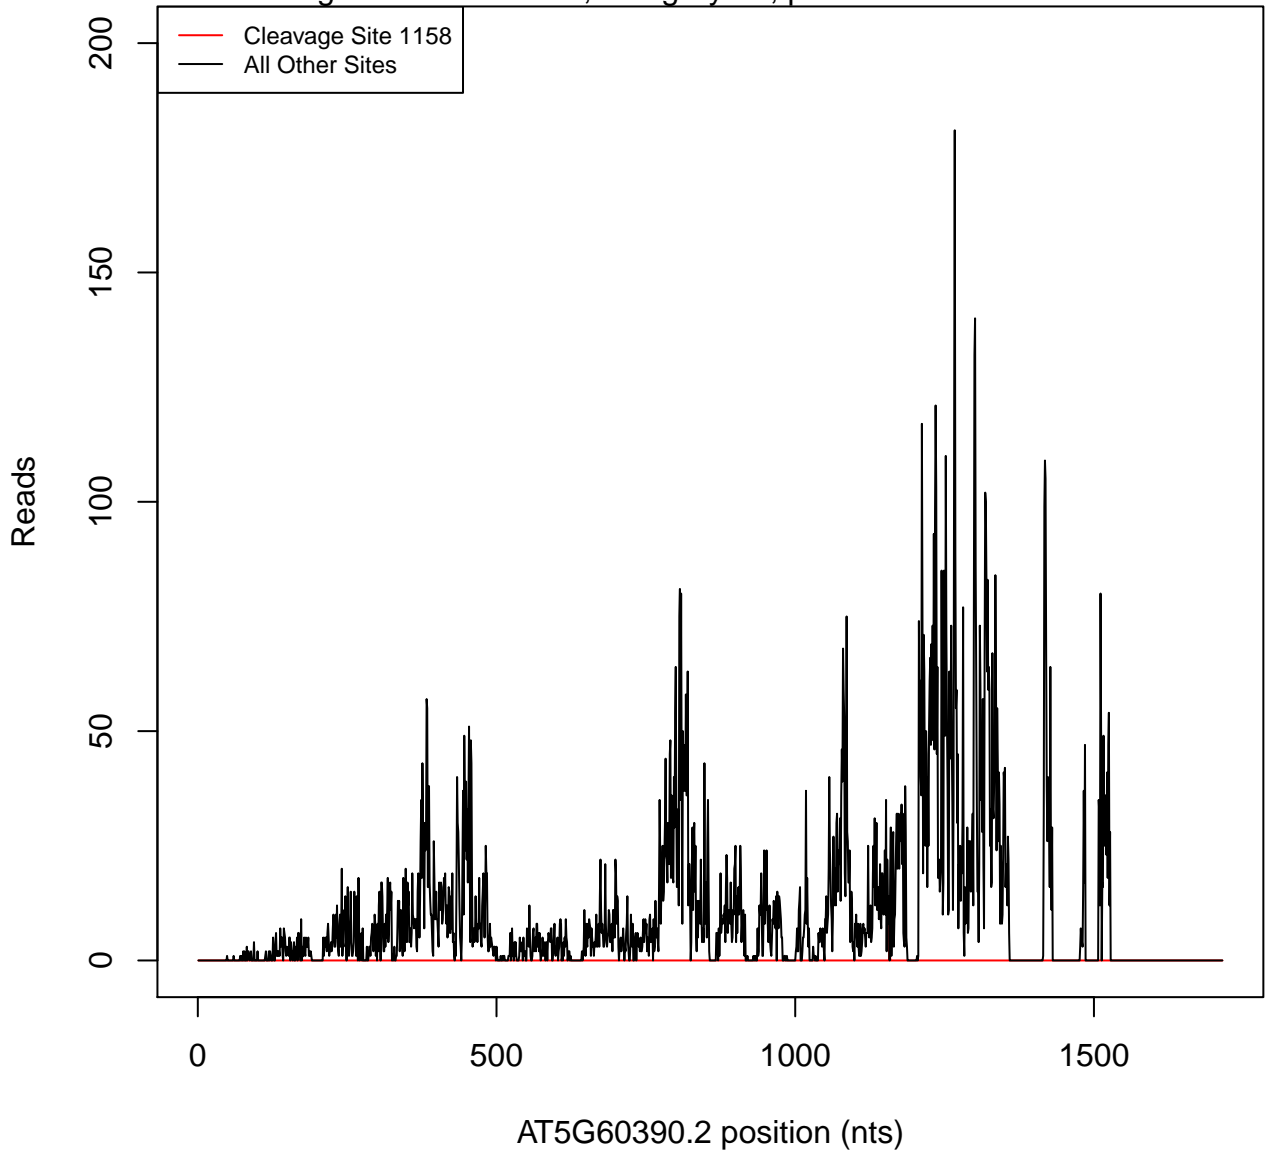

# PC-3p-41 slicing AT5G60390.3 at nt 1148

alignment score=3.5 , category=3 , p=0.0894501223743839

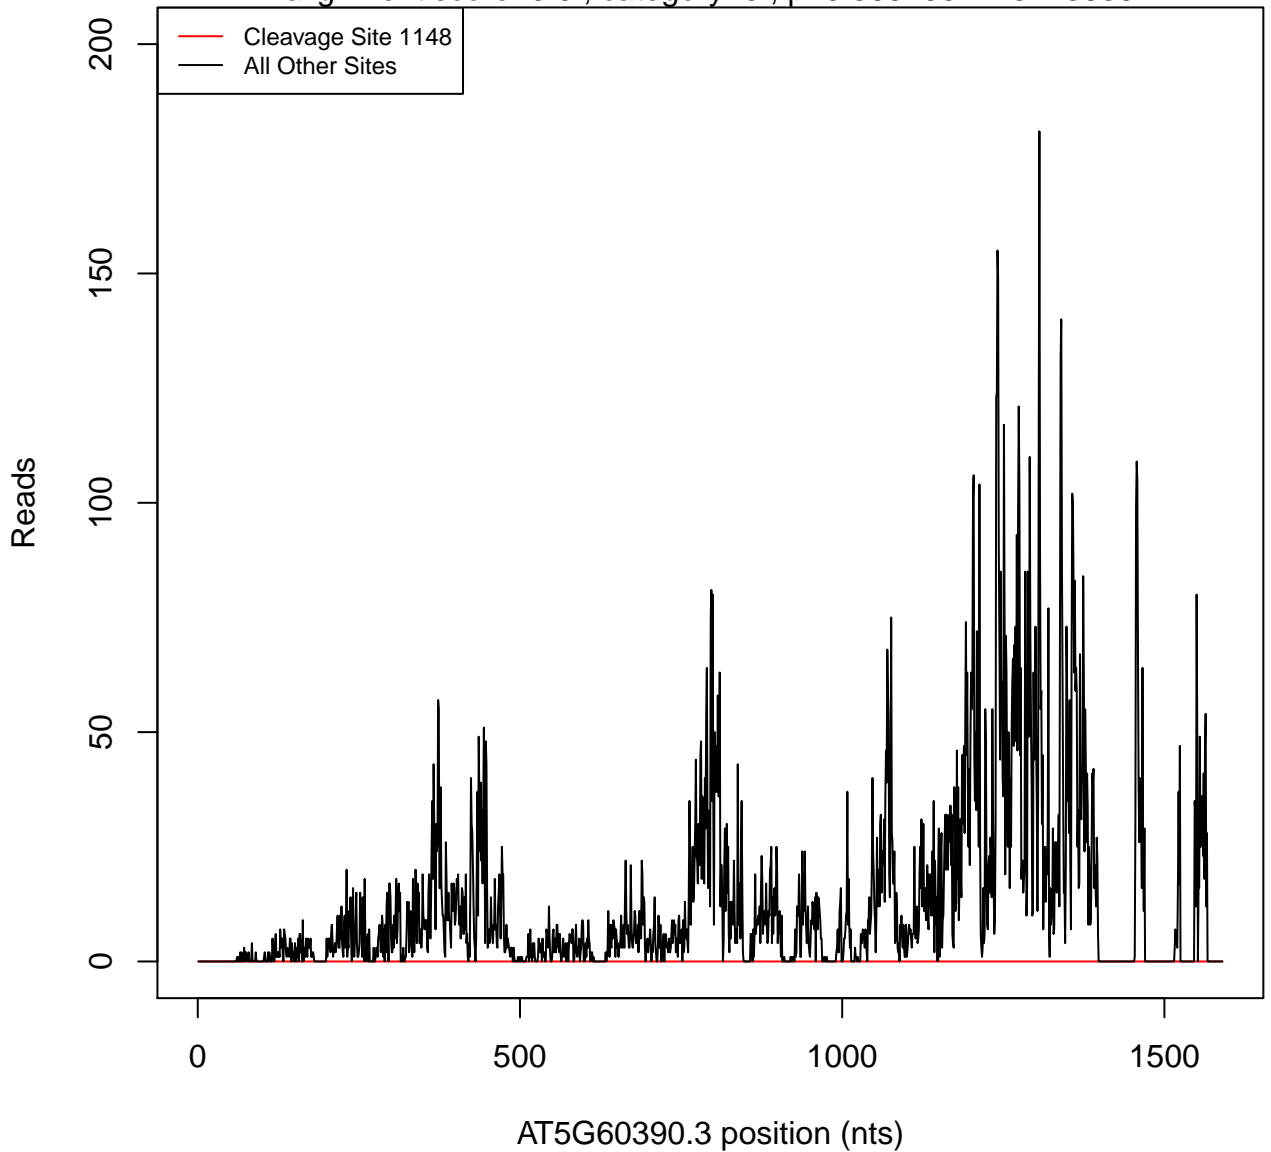

# rgl-miR5139\_L-1 slicing AT5G67460.1 at nt 1389

alignment score=2 , category=4 , p=0.0654767918236761

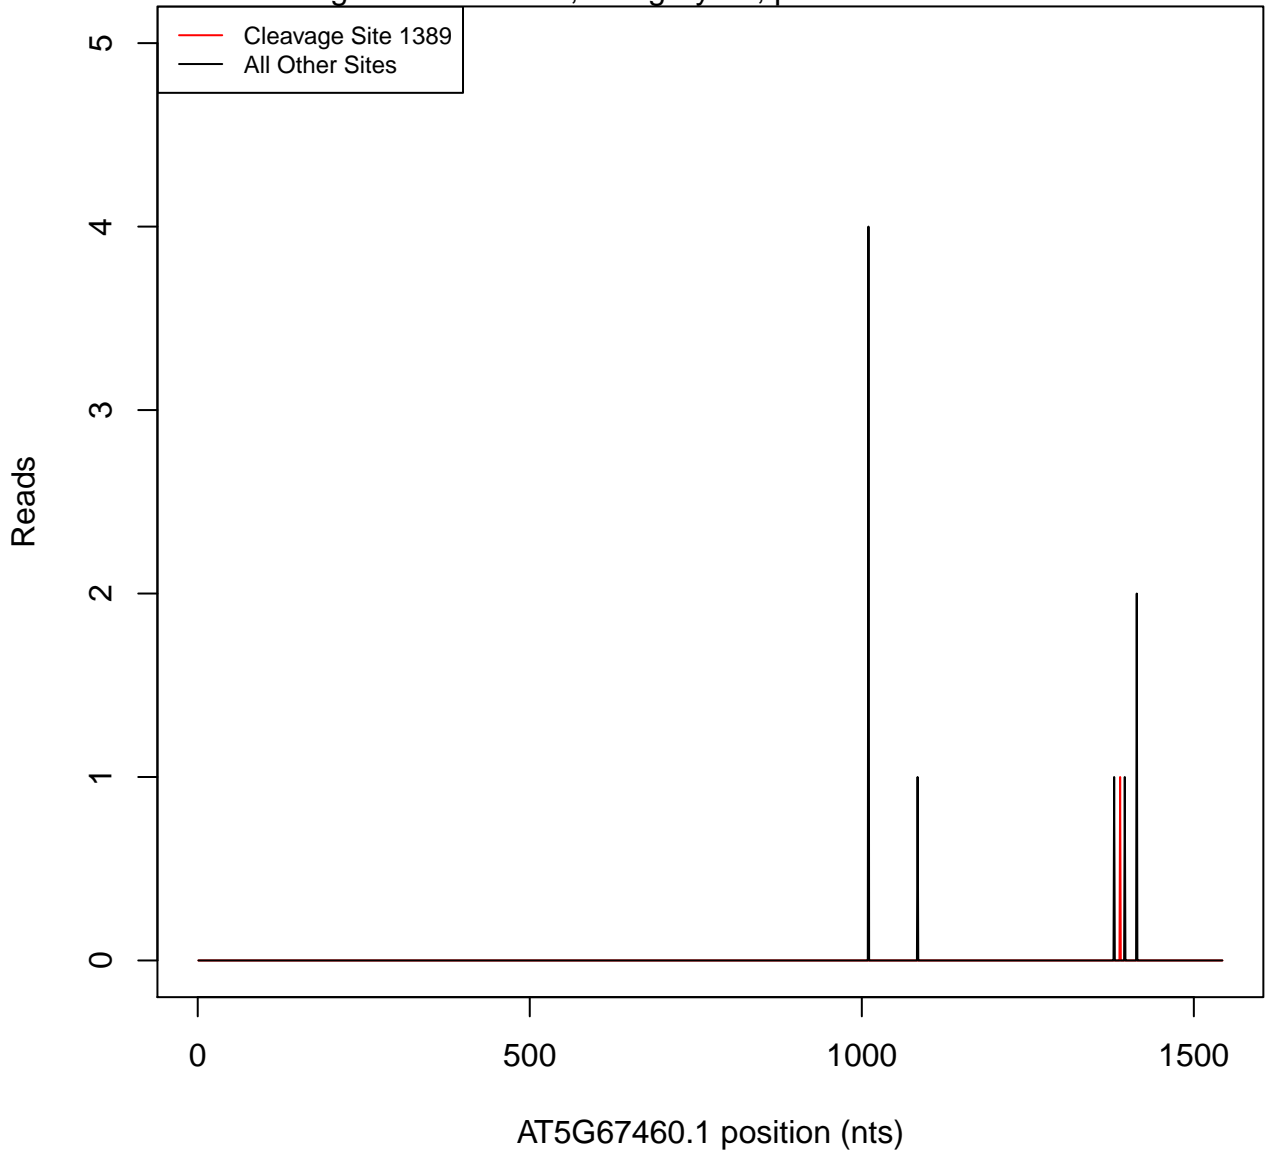

Supplement: 1471-2164-14-9-S3.pdf [file 1471-2164-14-9-S3.pdf]
