# Supplementary material for: Identification of miRNAs and their targets using high-throughput sequencing and degradome analysis in cytoplasmic male-sterile and its maintainer fertile lines of brassica juncea
Source: PubMed Central journal article supplement (PMC3553062; doi:10.1186/1471-2164-14-9), 2013-01-16

# ath-miR393a slicing AT1G12820.1 at nt 1895

alignment score=2 , category=0 , p=0.00925960406138815

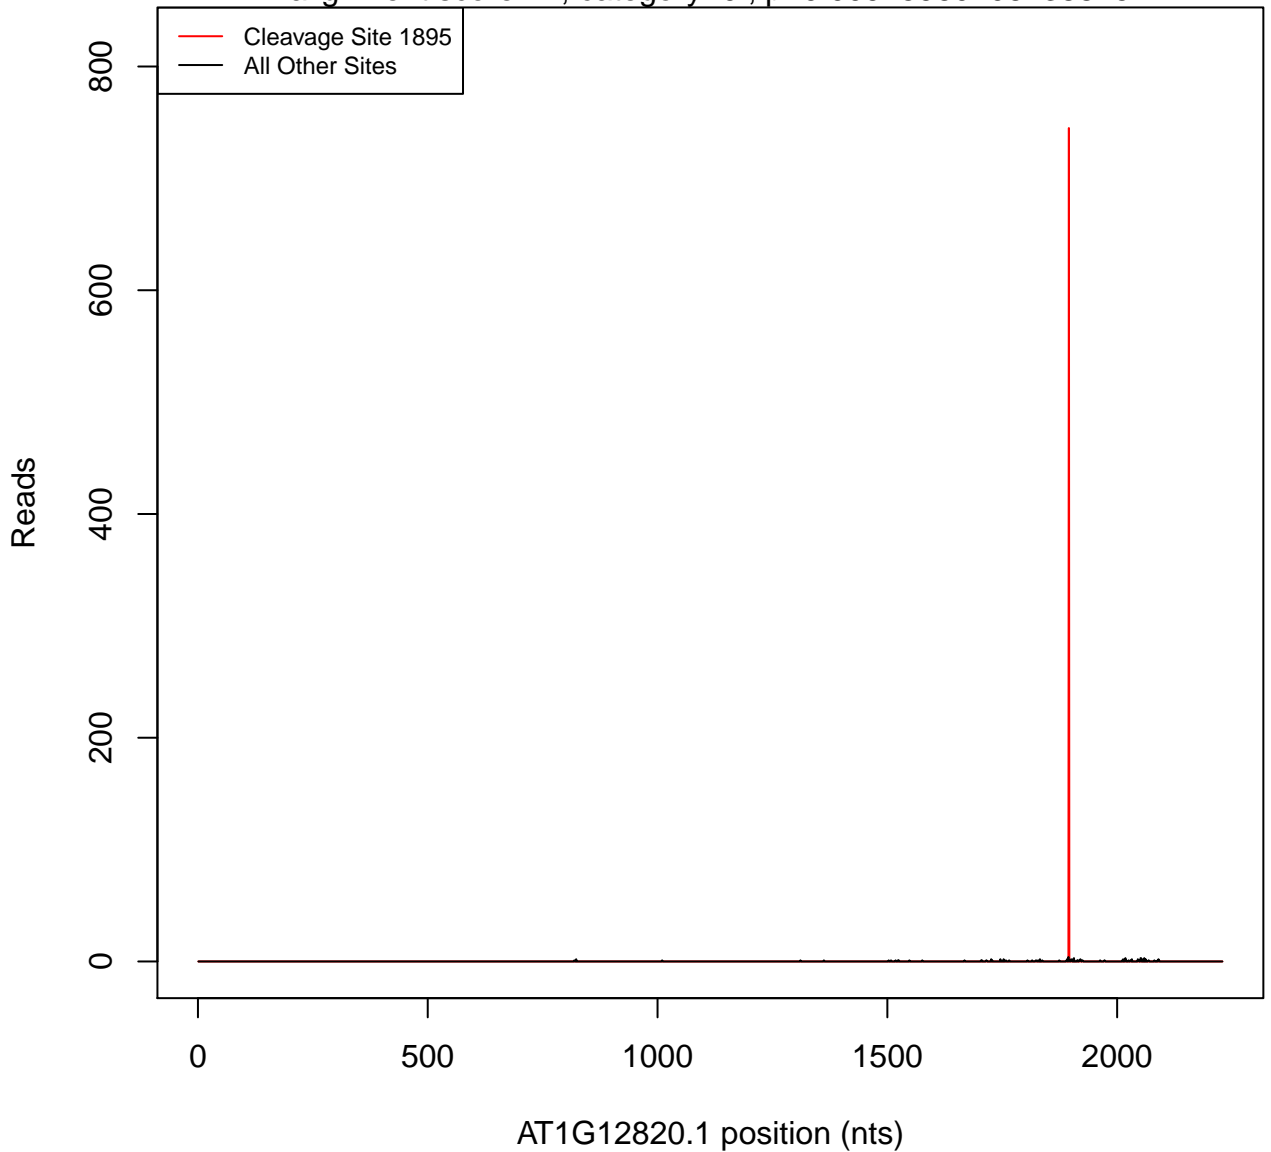

# ath-miR393b slicing AT1G12820.1 at nt 1895

alignment score=2 , category=0 , p=0.00925960406138815

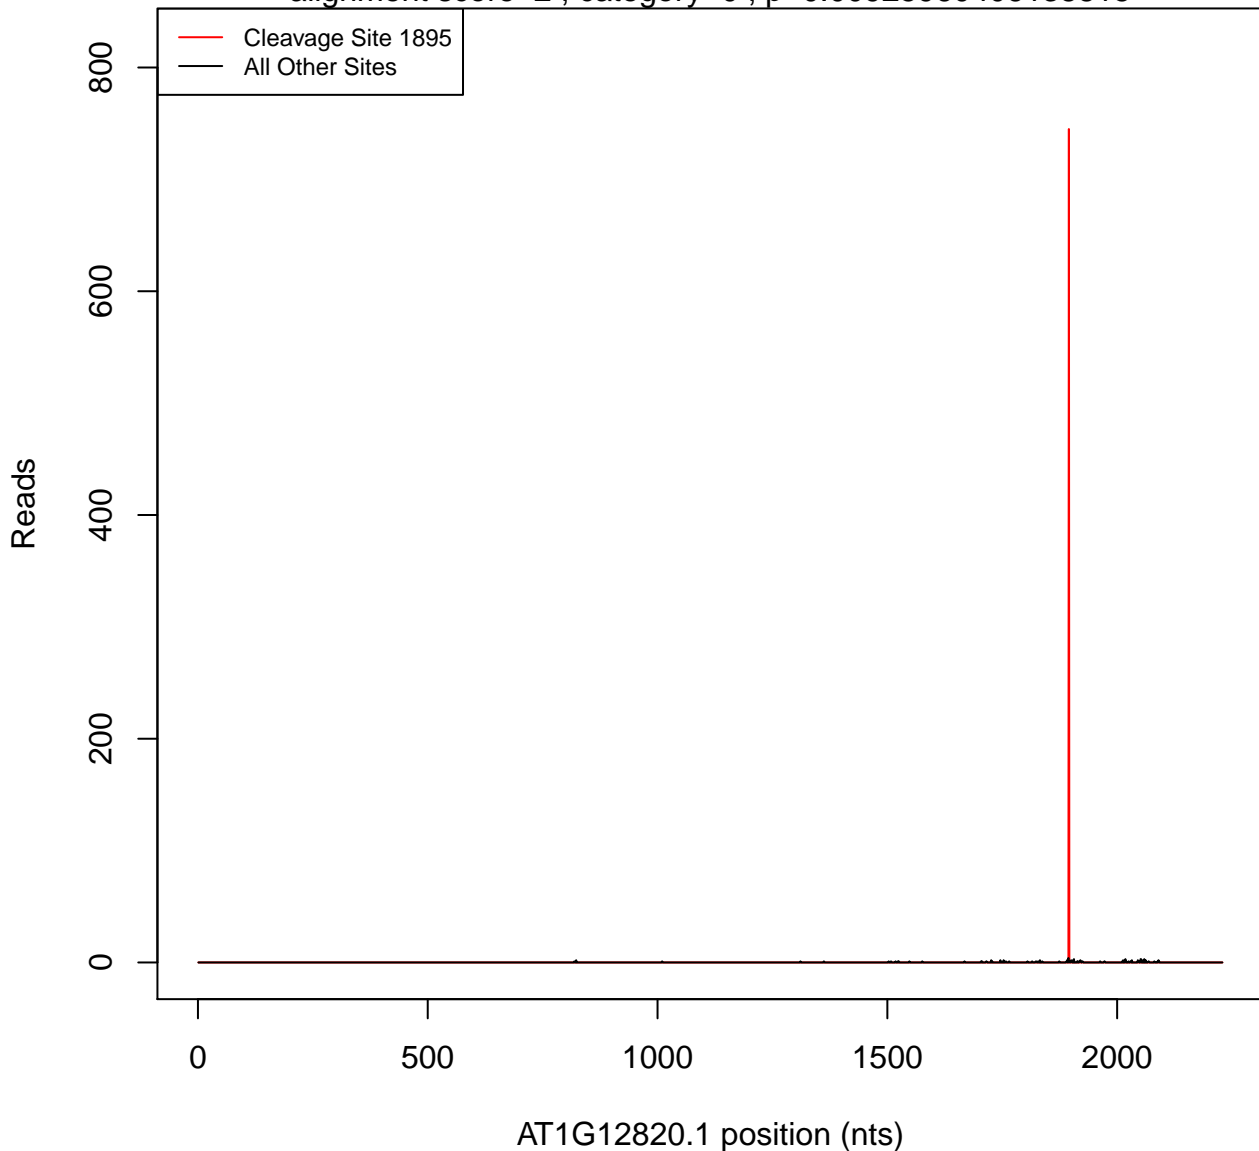

# ath-miR394a slicing AT1G27340.1 at nt 1383

alignment score=1 , category=0 , p=0.00274476325150719

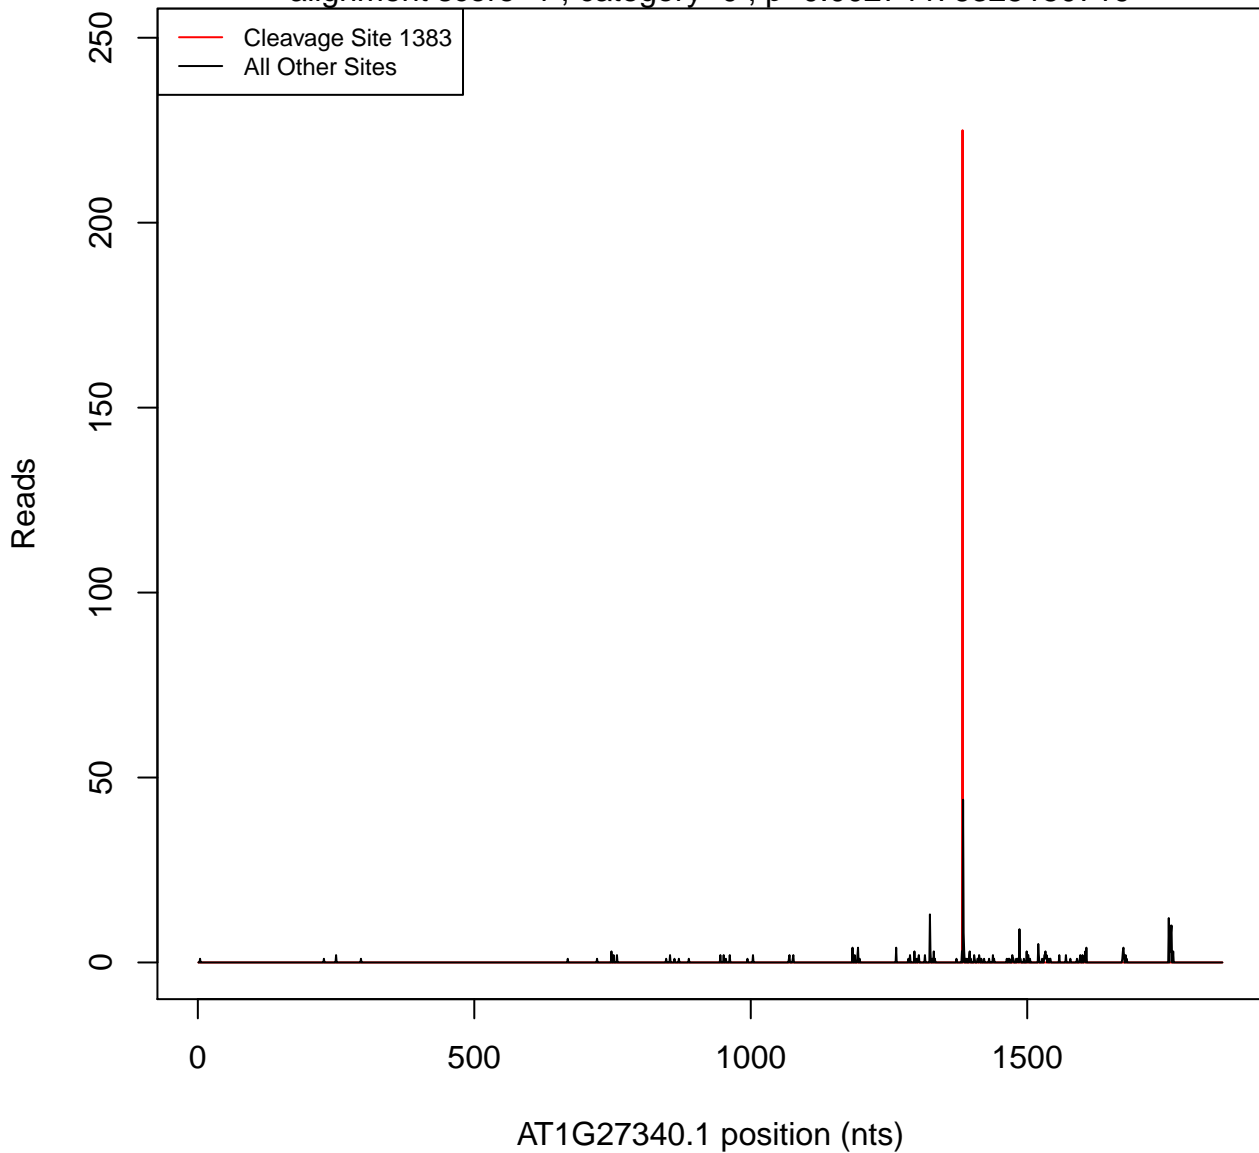

# ath-miR394b slicing AT1G27340.1 at nt 1383

alignment score=1 , category=0 , p=0.00274476325150719

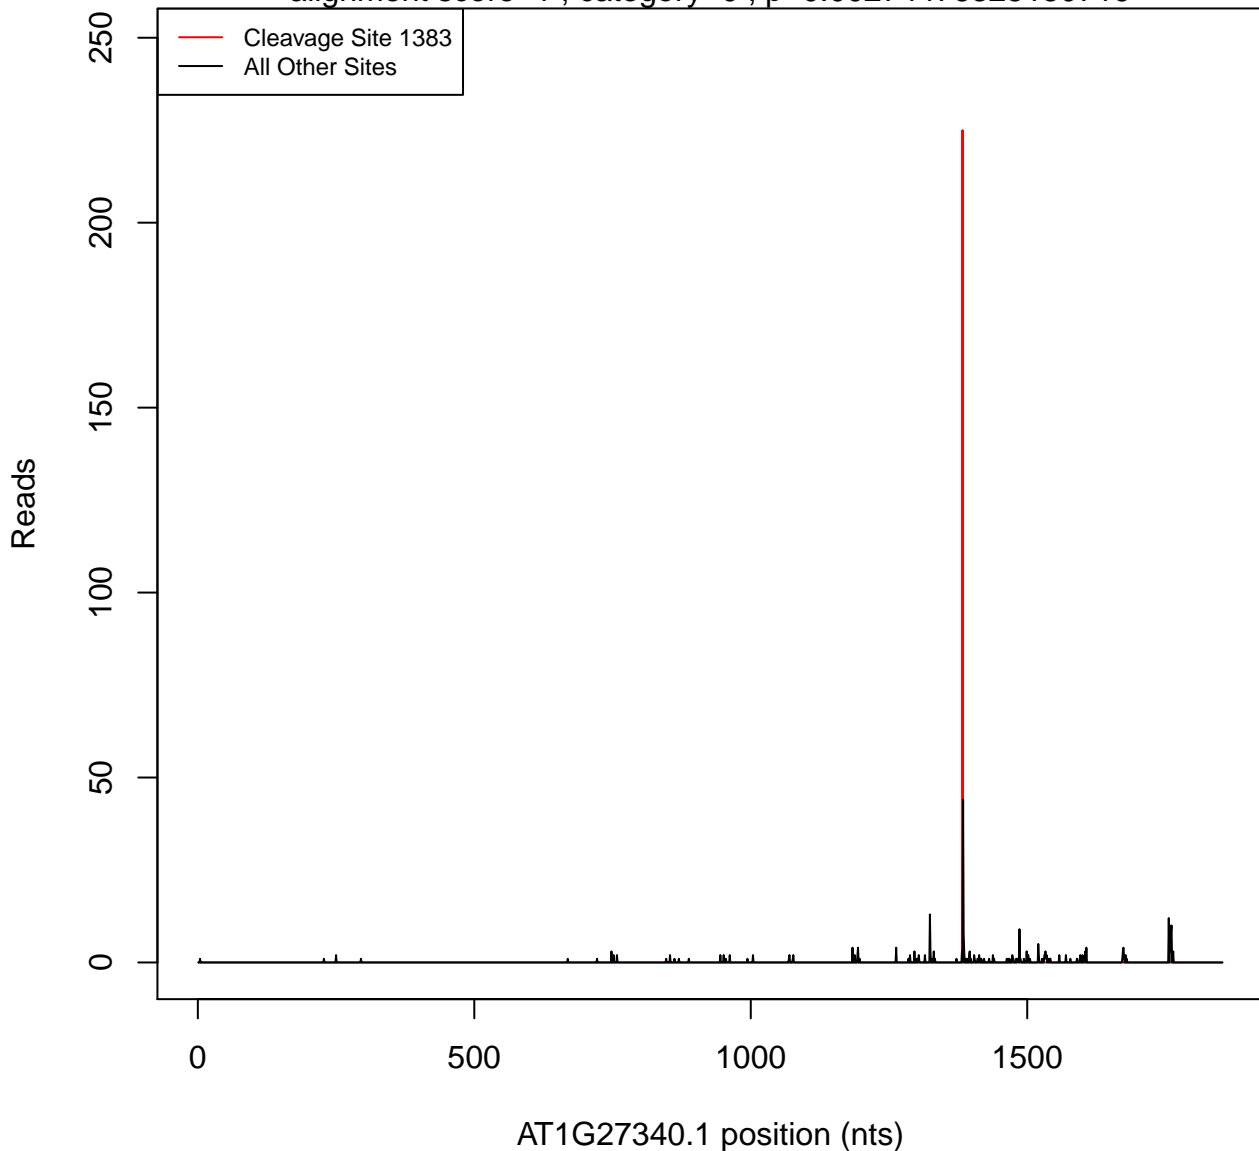

# ath-miR156a slicing AT1G27360.1 at nt 1263

alignment score=1 , category=0 , p=0.0456503157497291

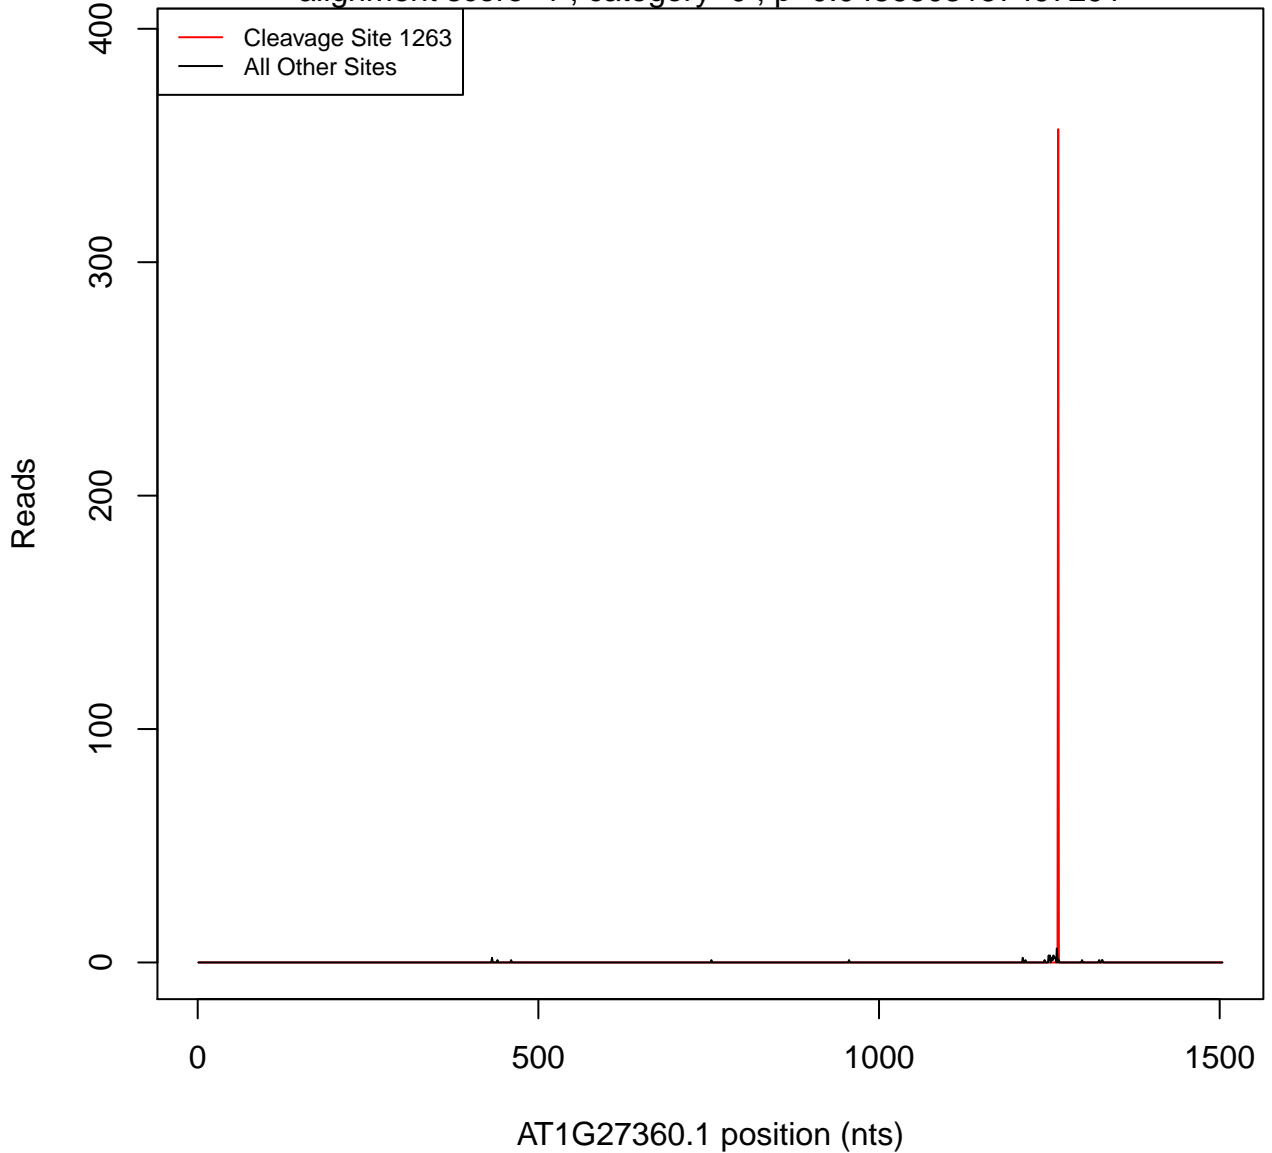

# ath-miR156b slicing AT1G27360.1 at nt 1263

alignment score=1 , category=0 , p=0.0456503157497291

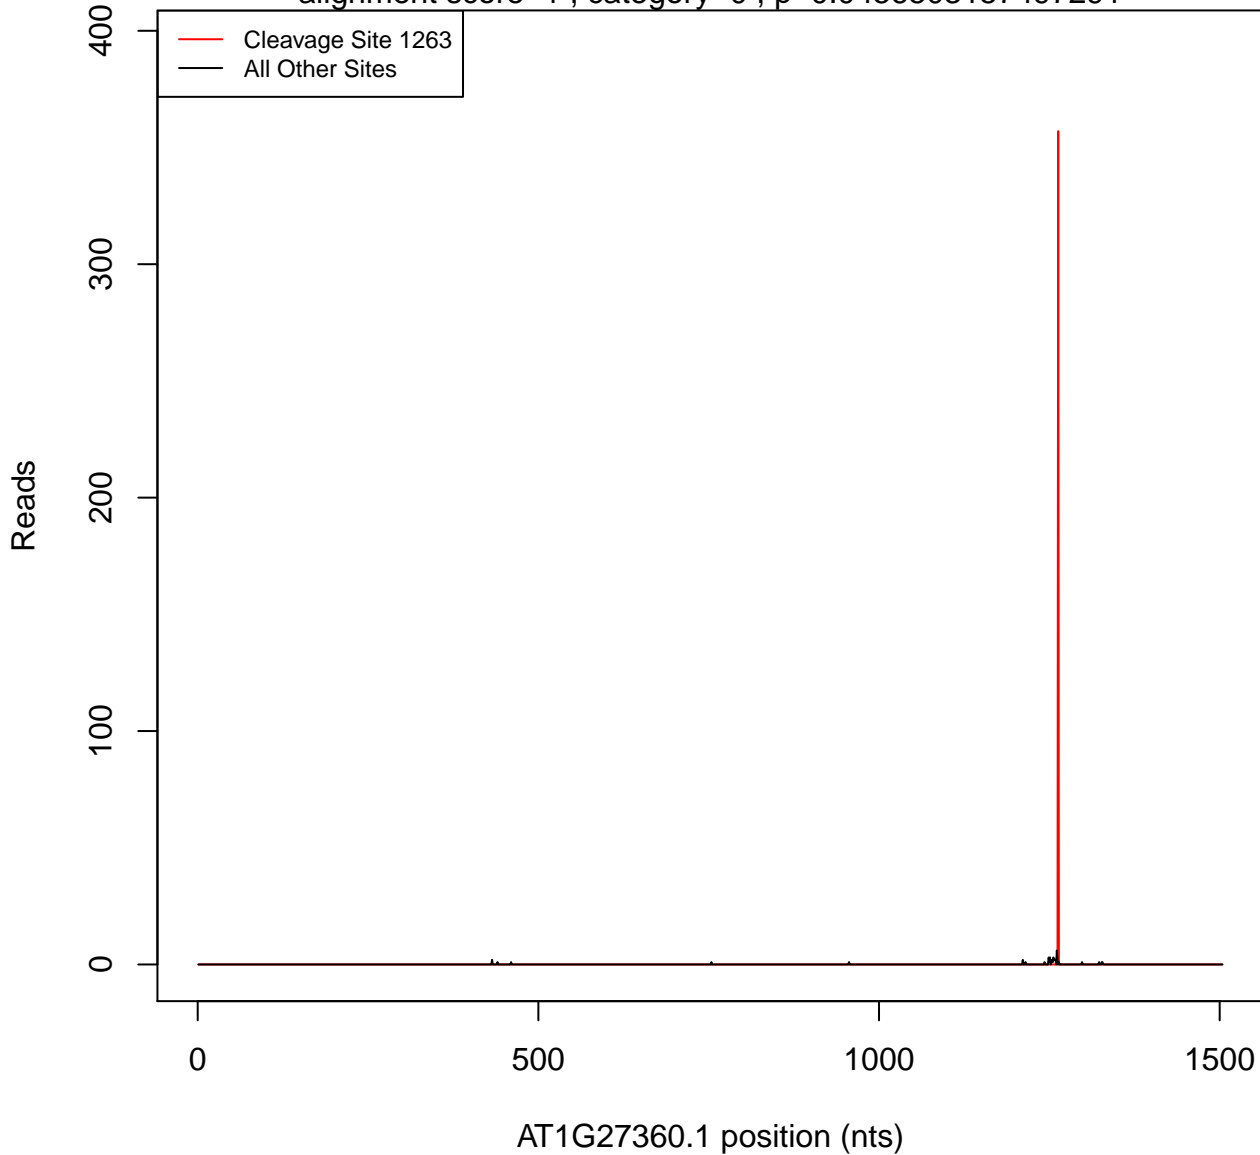

# ath-miR156c slicing AT1G27360.1 at nt 1263

alignment score=1 , category=0 , p=0.0456503157497291



# ath-miR156d slicing AT1G27360.1 at nt 1263

alignment score=1 , category=0 , p=0.0456503157497291





# ath-miR156e slicing AT1G27360.1 at nt 1263

alignment score=1 , category=0 , p=0.0456503157497291



# ath-miR156f slicing AT1G27360.1 at nt 1263

alignment score=1 , category=0 , p=0.0456503157497291

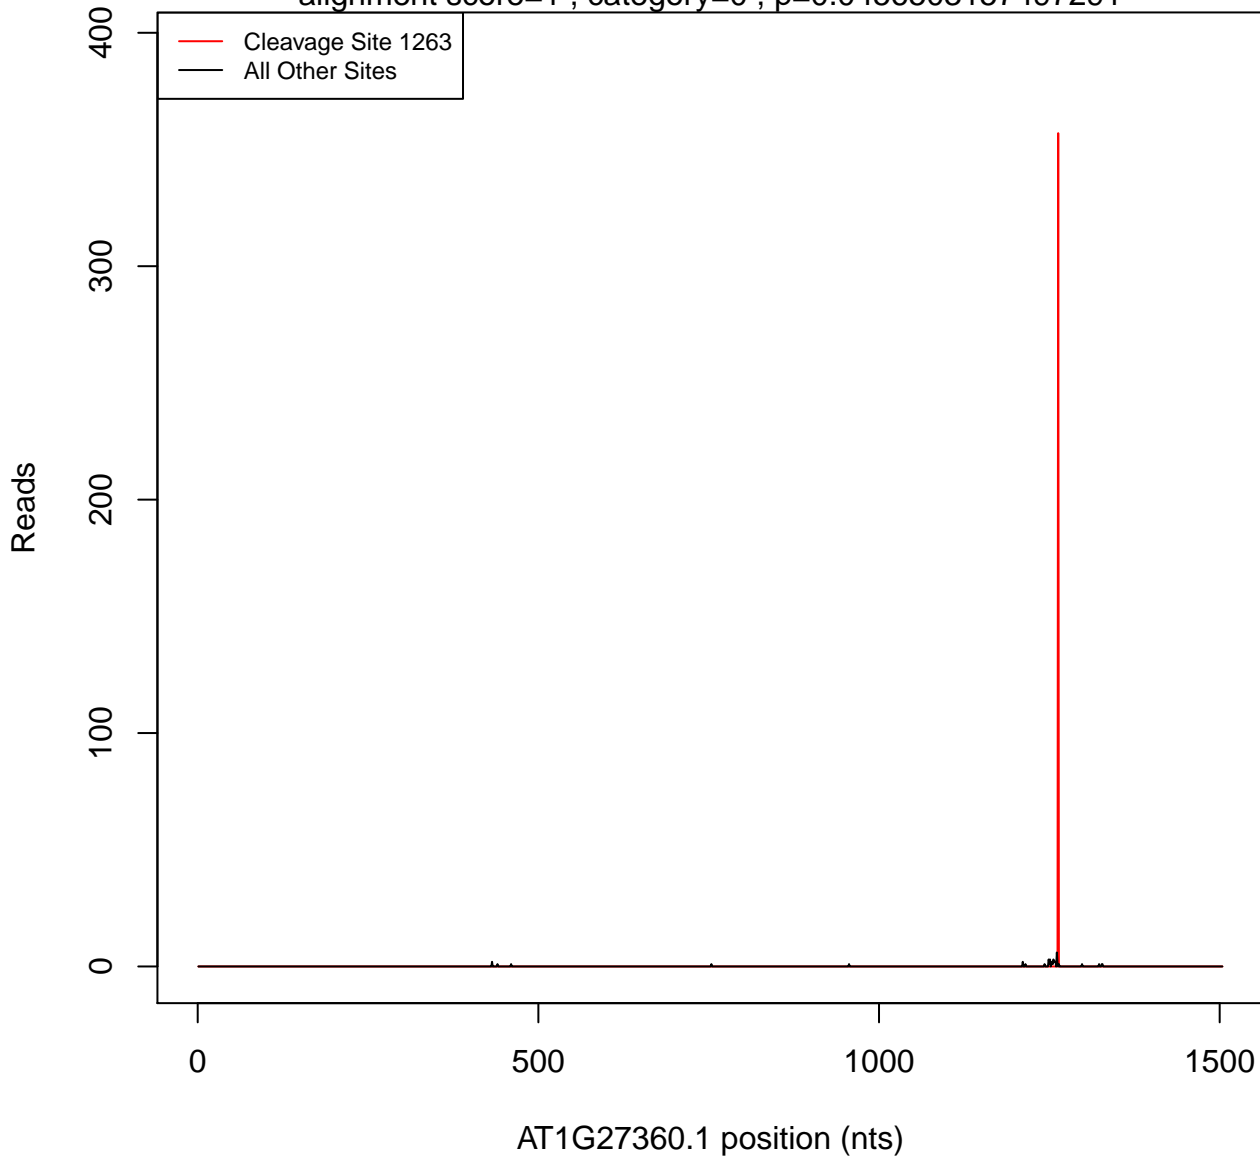

# ath-miR156g slicing AT1G27360.1 at nt 1263

alignment score=2 , category=0 , p=0.0387652739078221

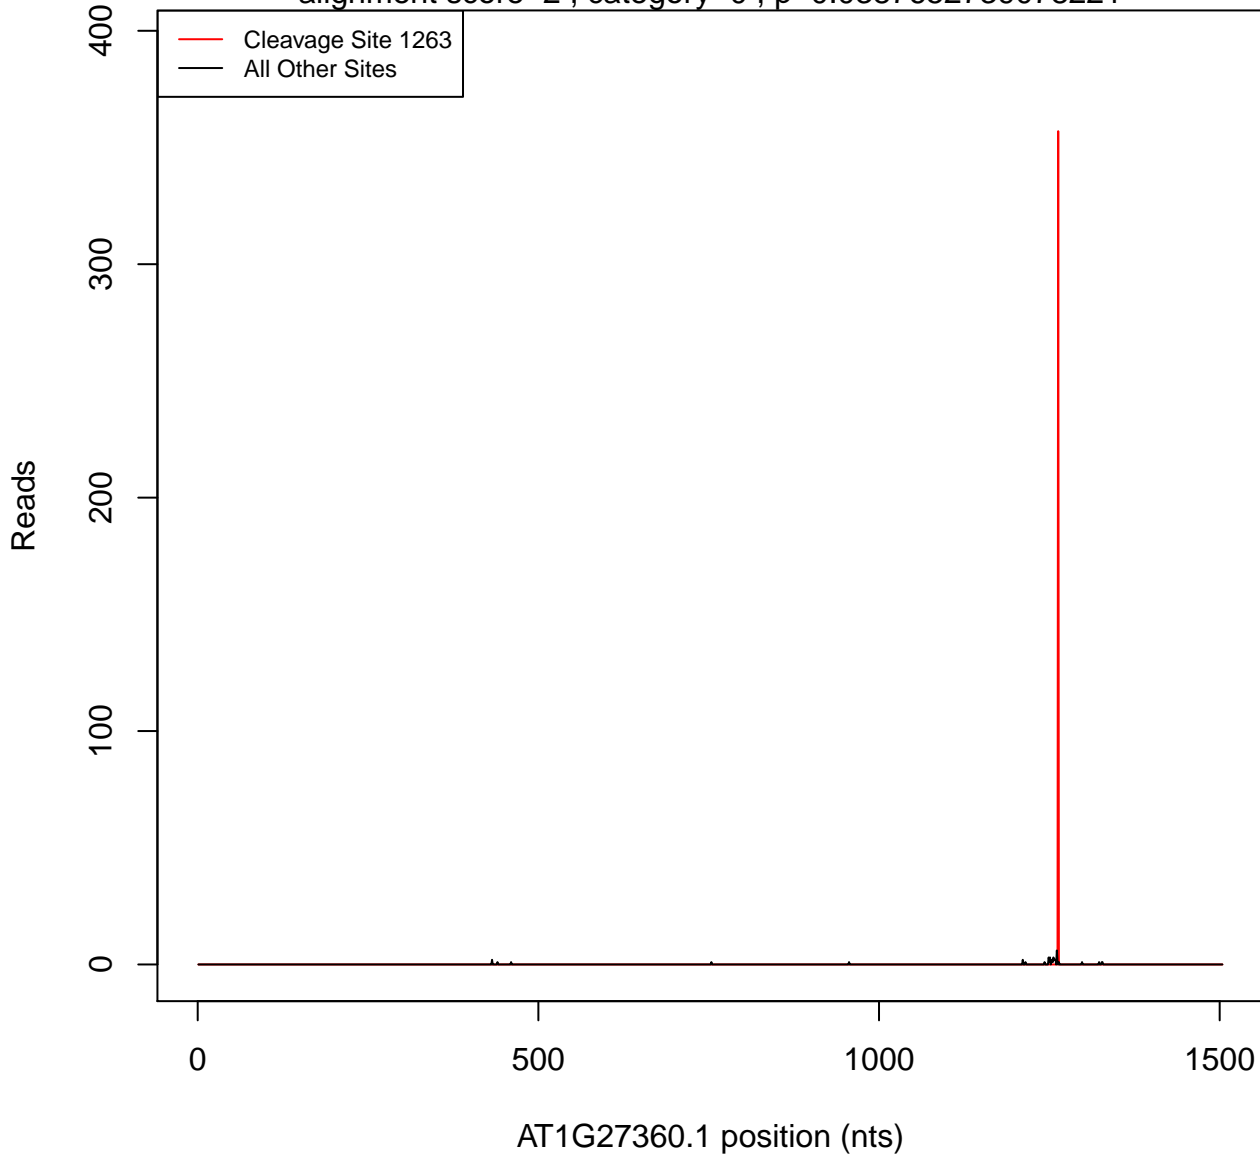

# ath-miR156h slicing AT1G27360.1 at nt 1263

alignment score=2 , category=0 , p=0.0432259504343167

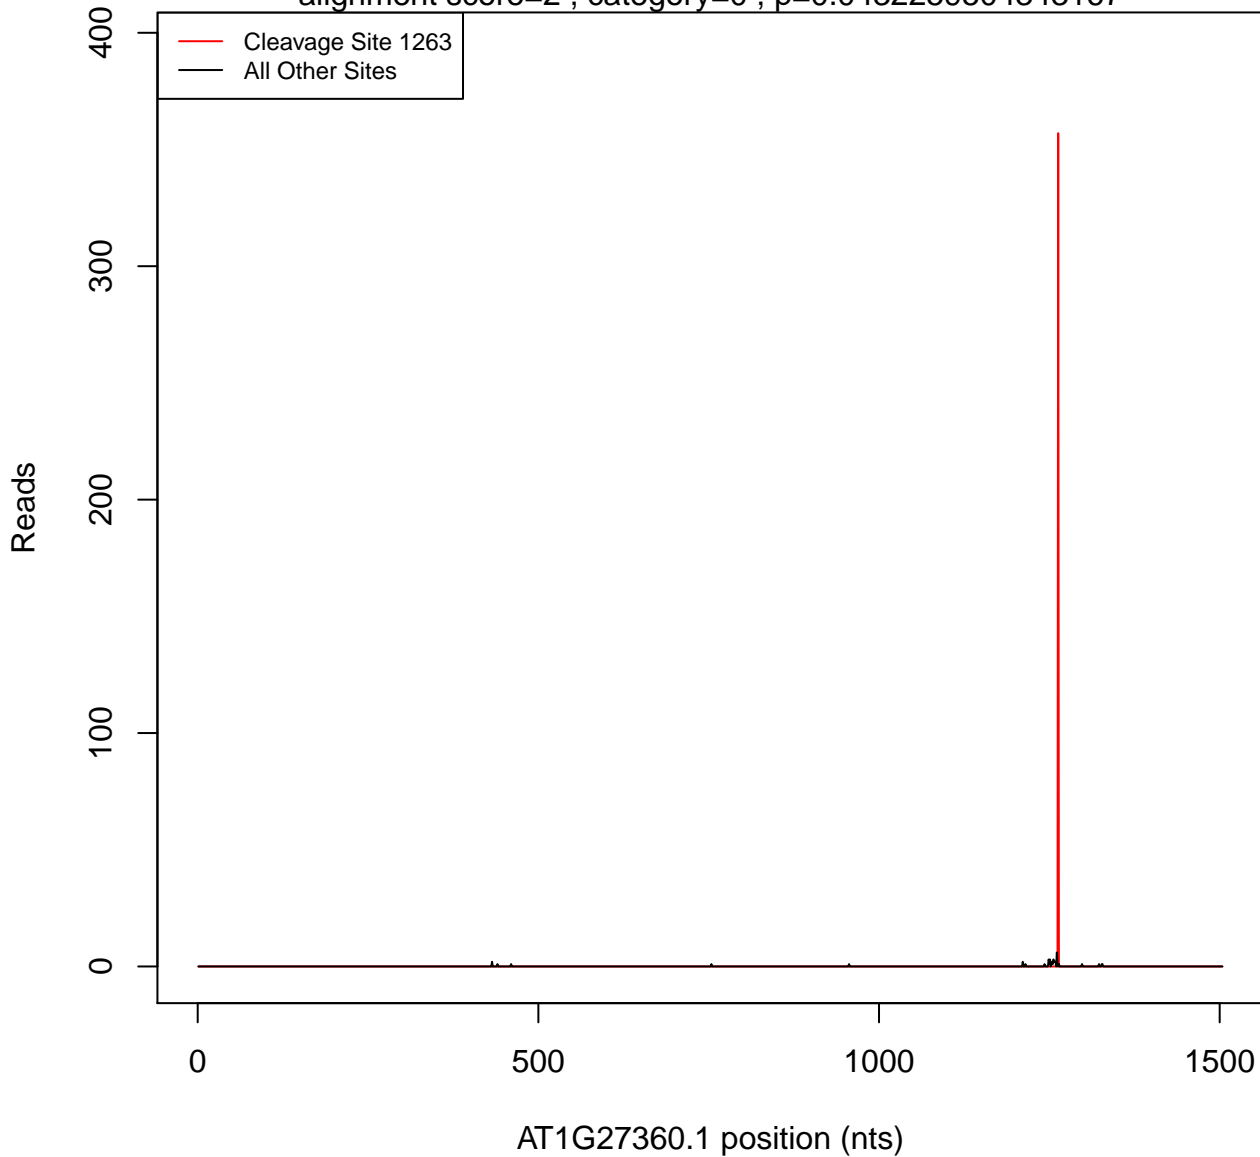

# ath-miR156i slicing AT1G27360.1 at nt 1263

alignment score=1 , category=0 , p=0.0482697796921467

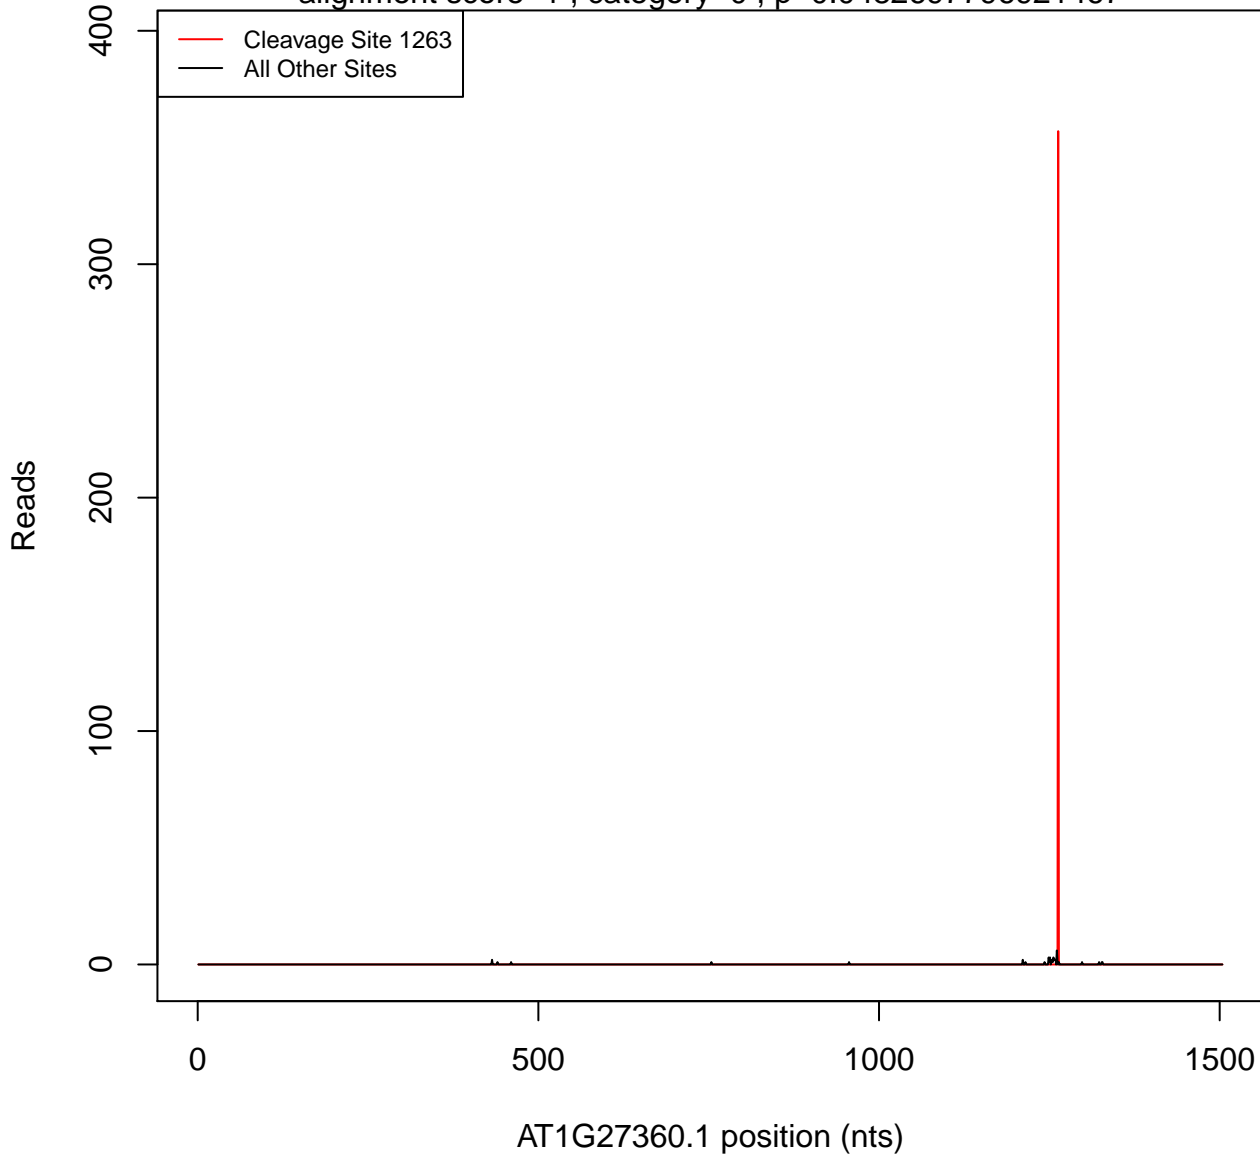

# ath-miR156j slicing AT1G27360.1 at nt 1263

alignment score=0 , category=0 , p=0.0524860420603949

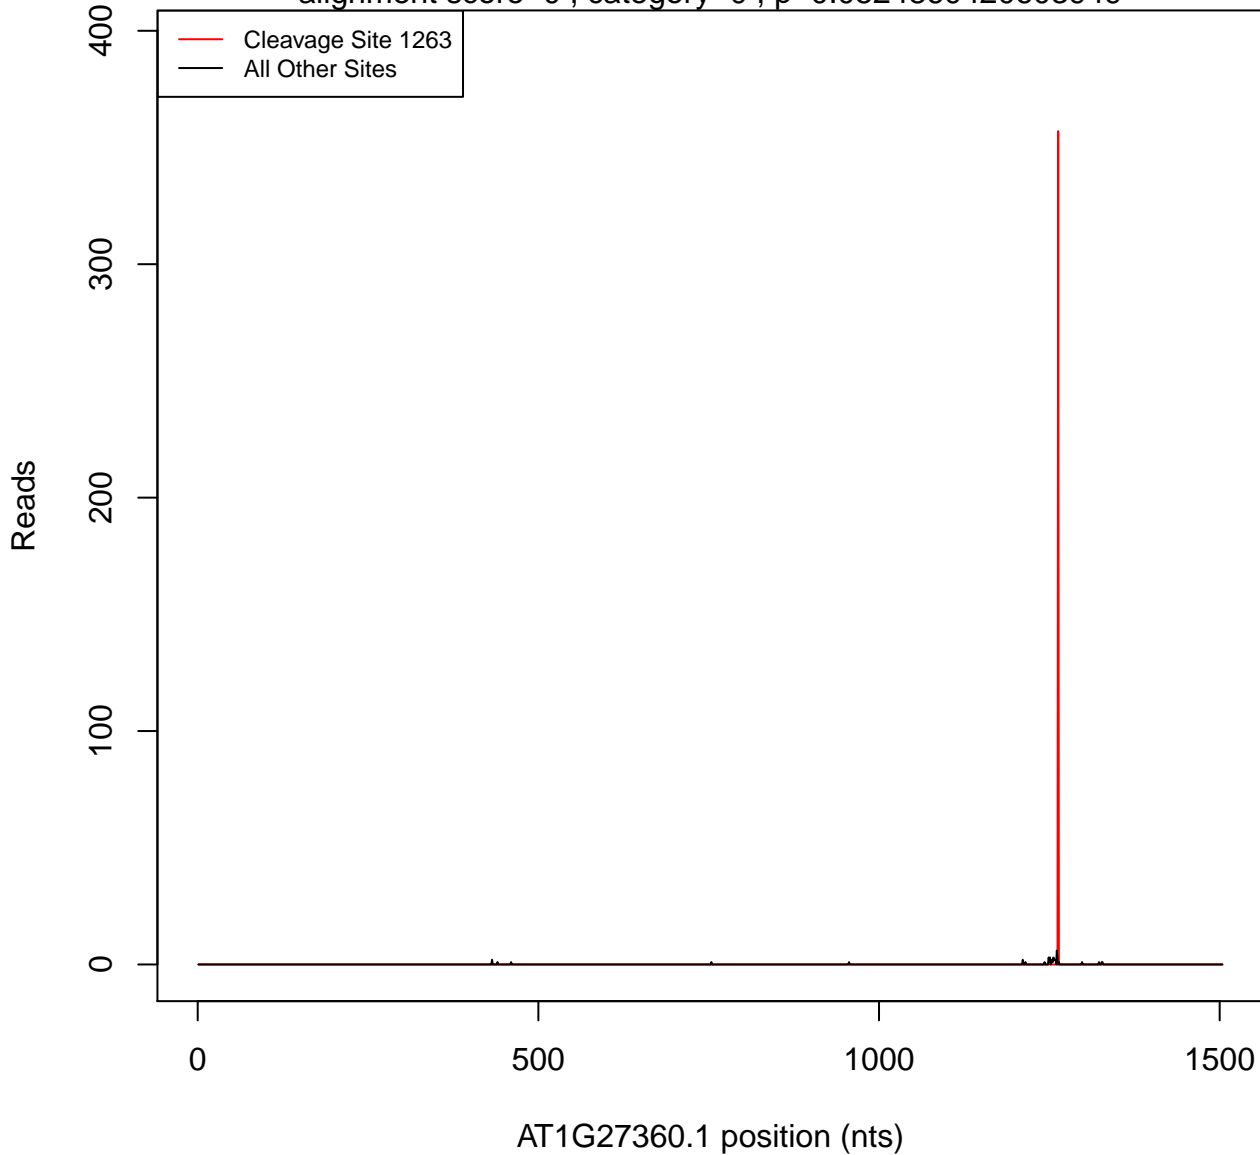

# ath-miR157d slicing AT1G27360.1 at nt 1263

alignment score=2 , category=0 , p=0.0432259504343167

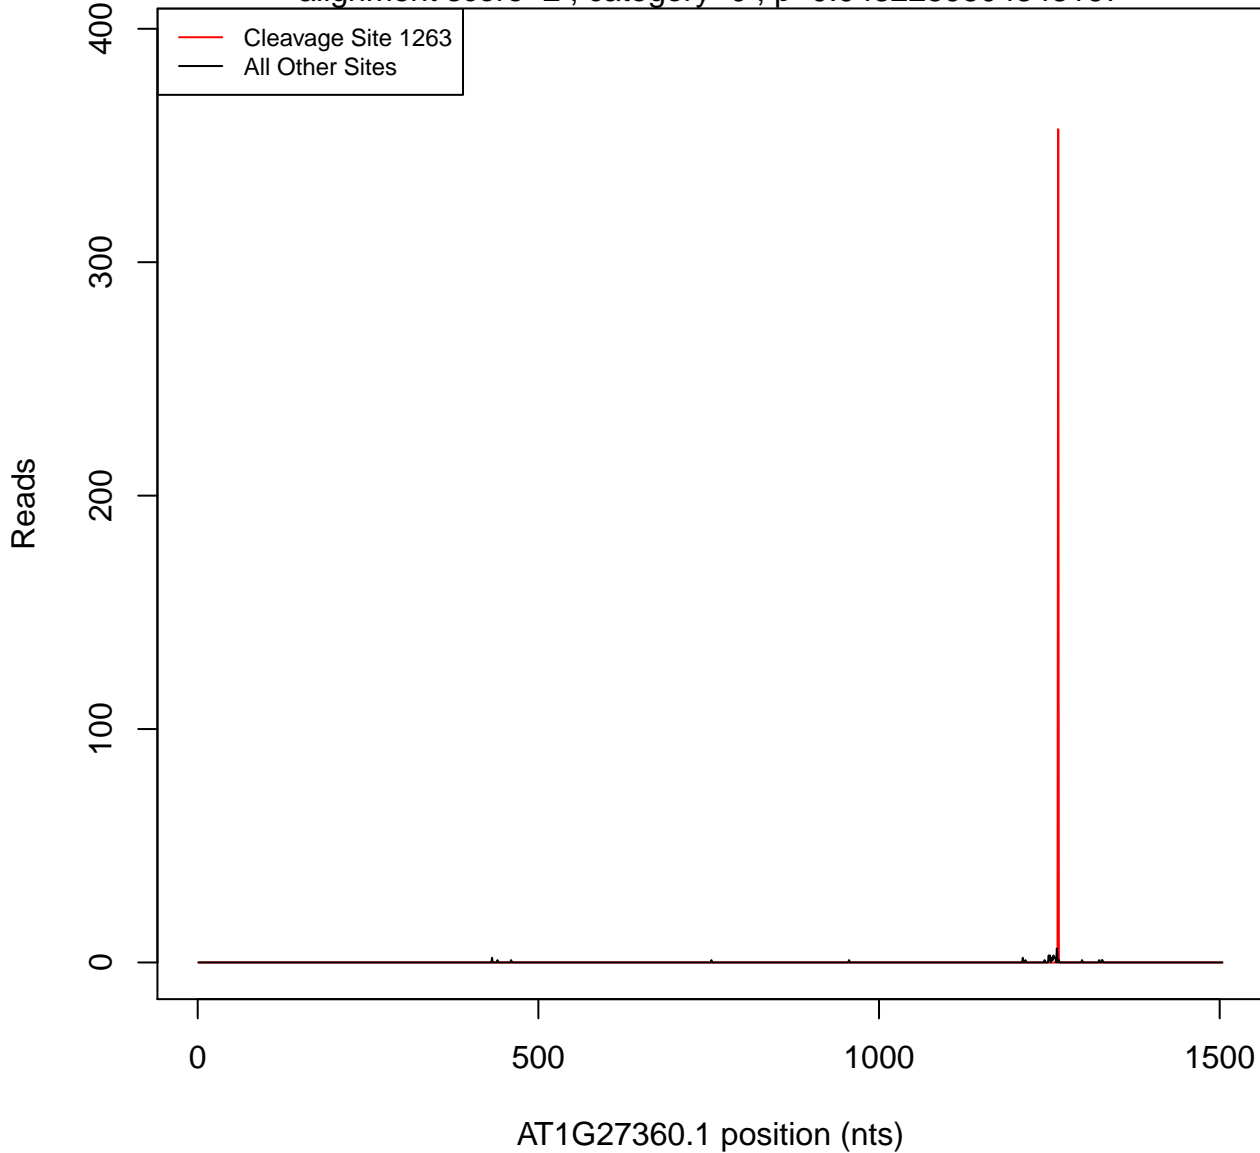

# ath-miR156a slicing AT1G27360.2 at nt 1223

alignment score=1 , category=0 , p=0.0456503157497291

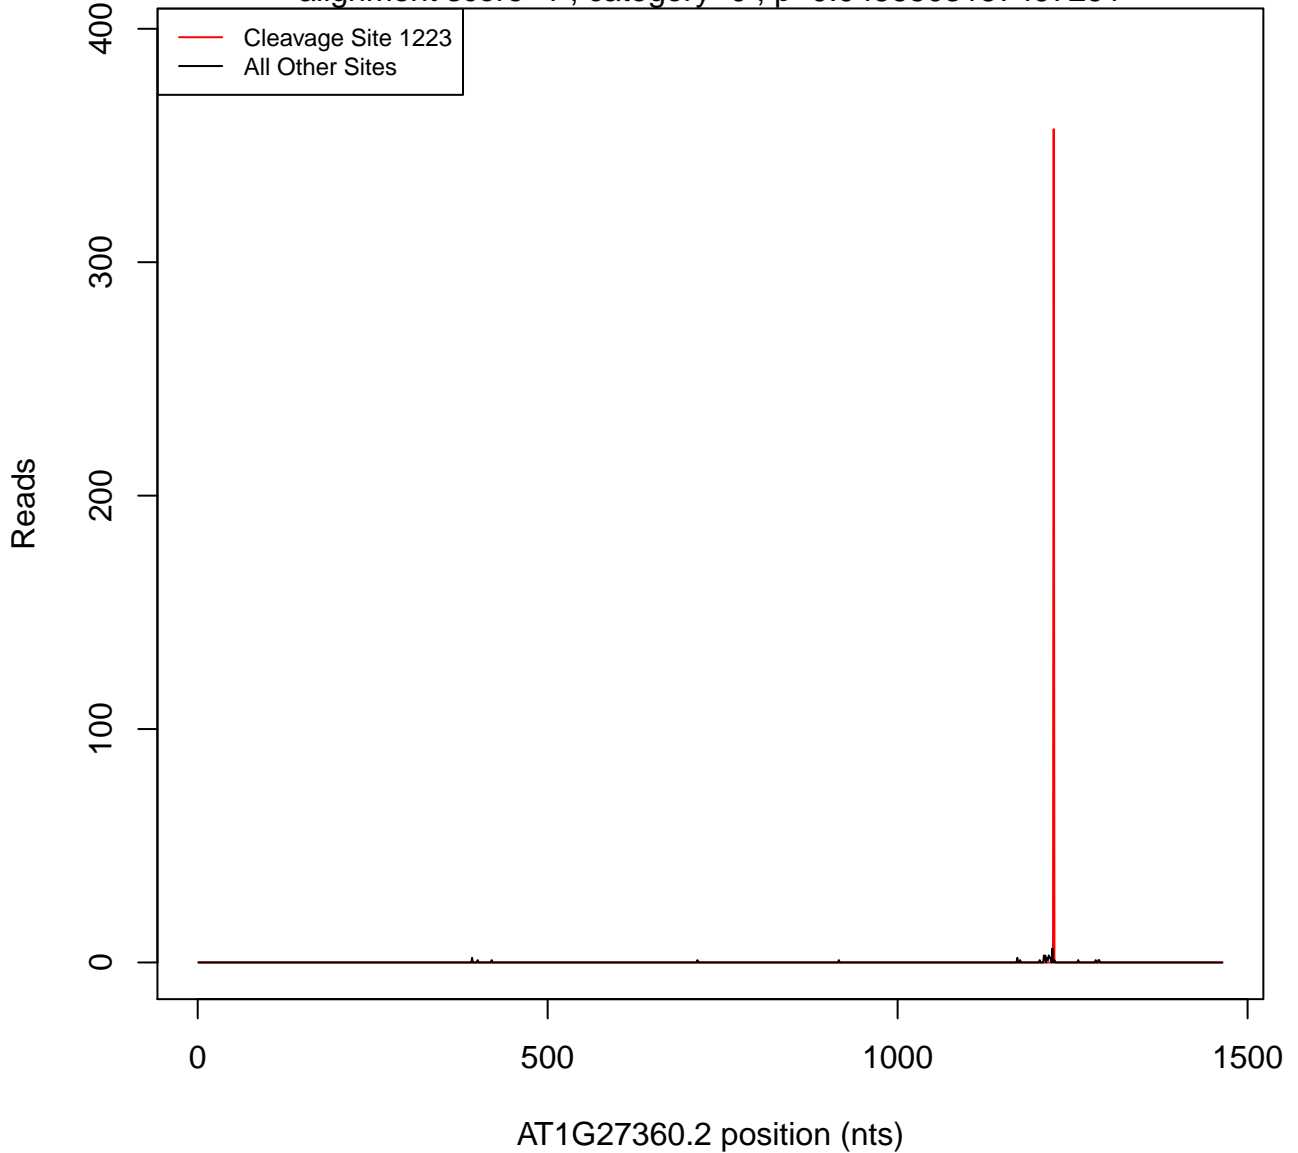



# ath-miR156b slicing AT1G27360.2 at nt 1223

alignment score=1 , category=0 , p=0.0456503157497291

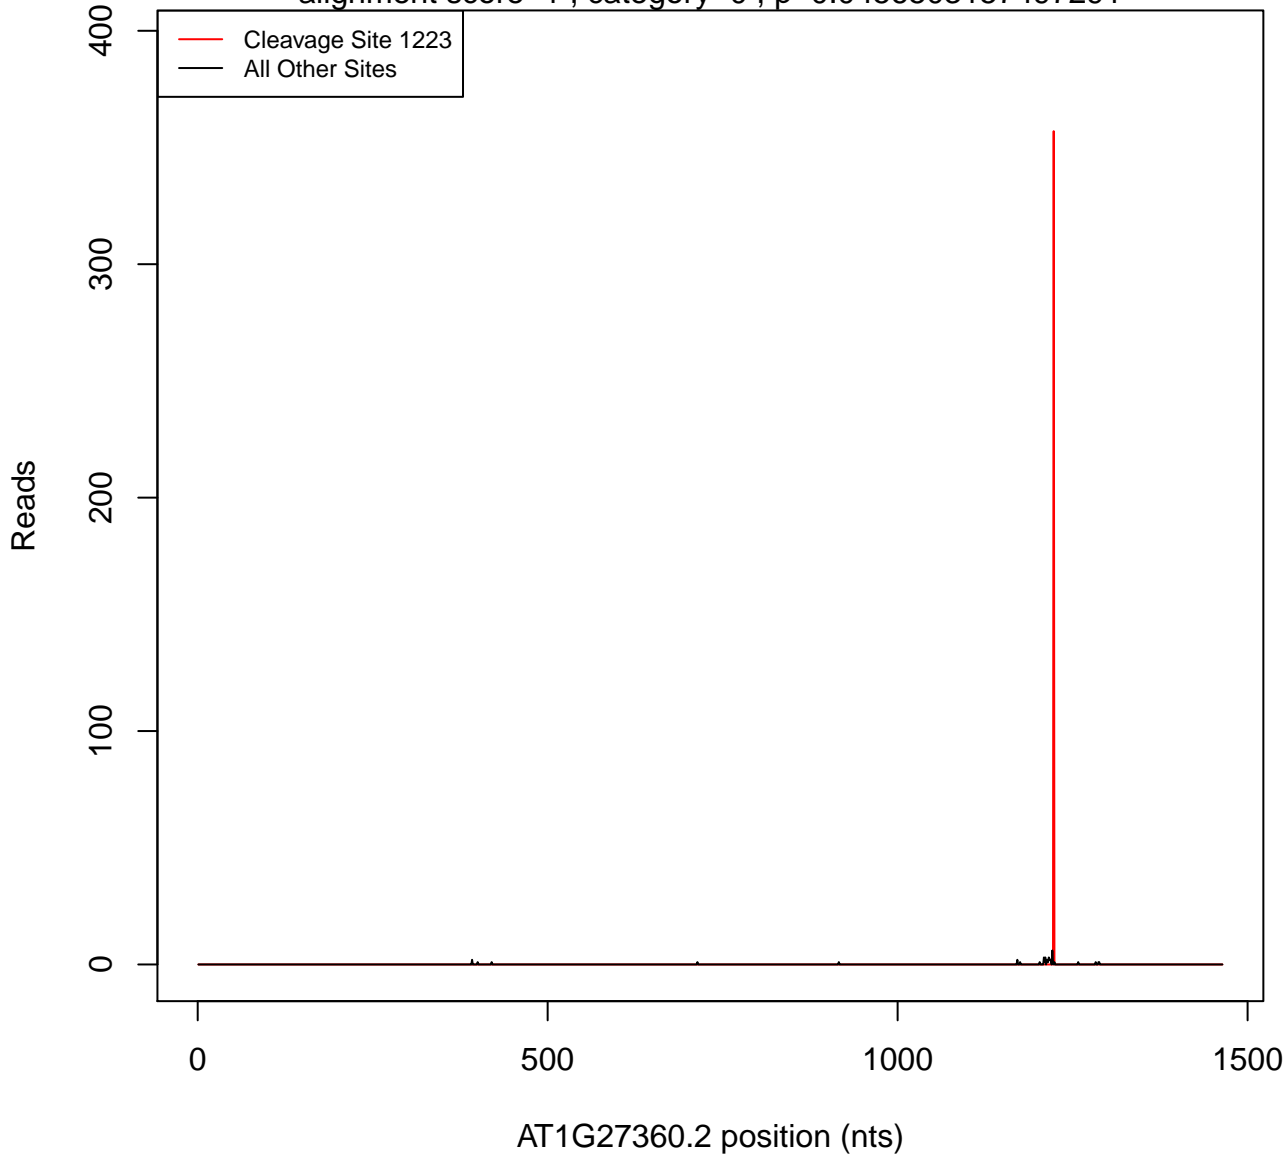

# ath-miR156c slicing AT1G27360.2 at nt 1223

alignment score=1 , category=0 , p=0.0456503157497291

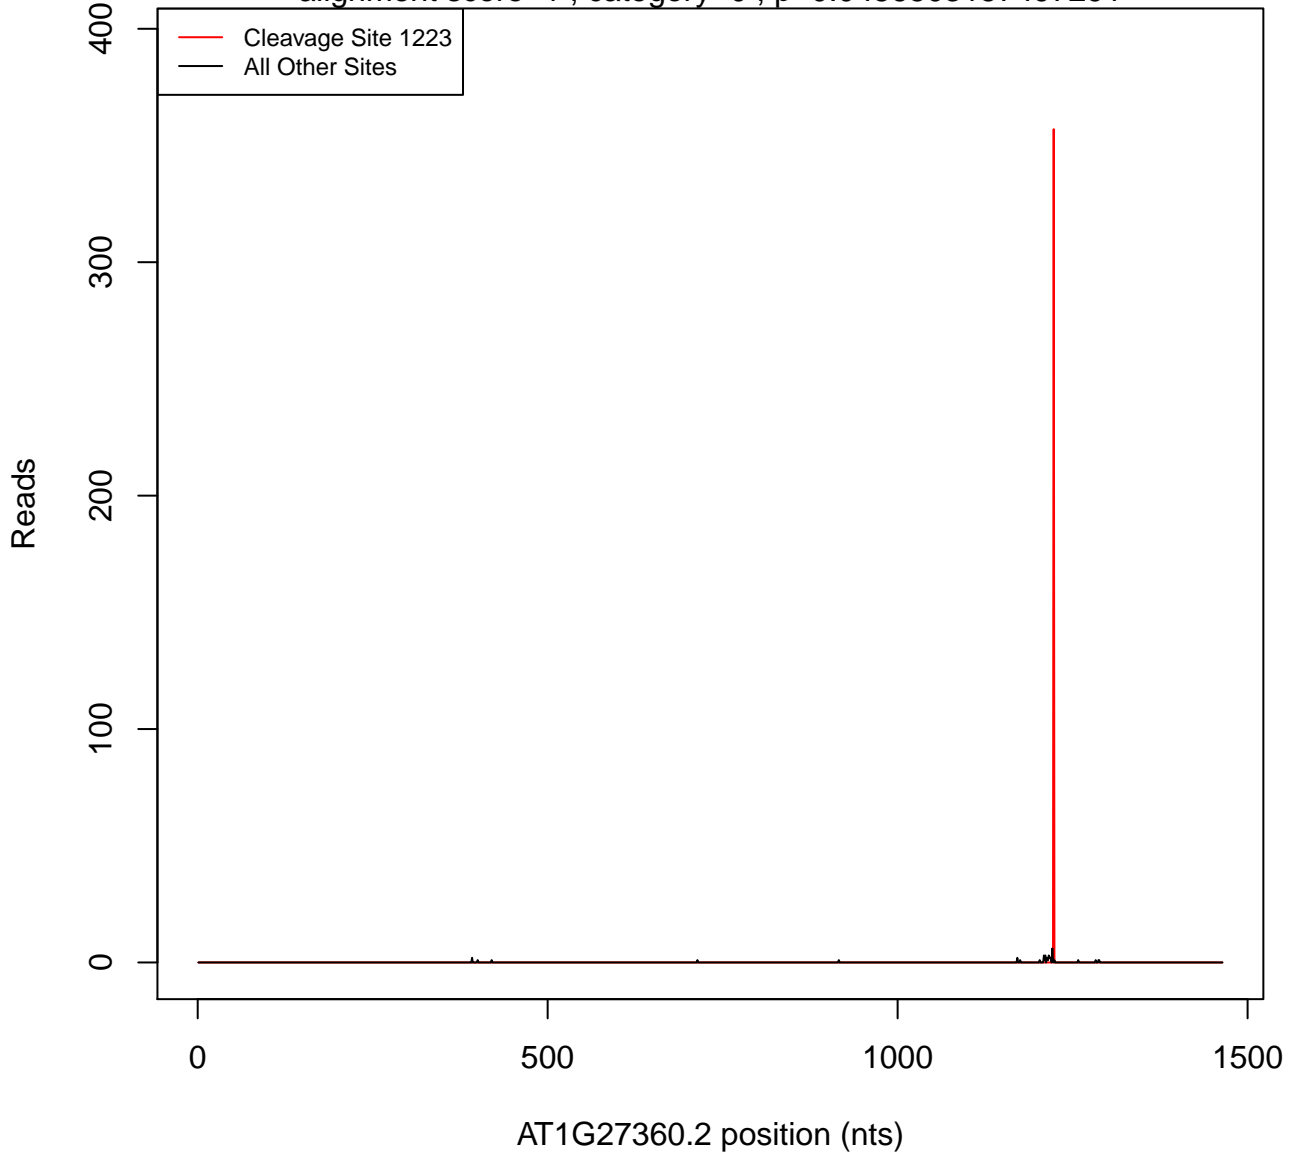

# ath-miR156d slicing AT1G27360.2 at nt 1223

alignment score=1 , category=0 , p=0.0456503157497291

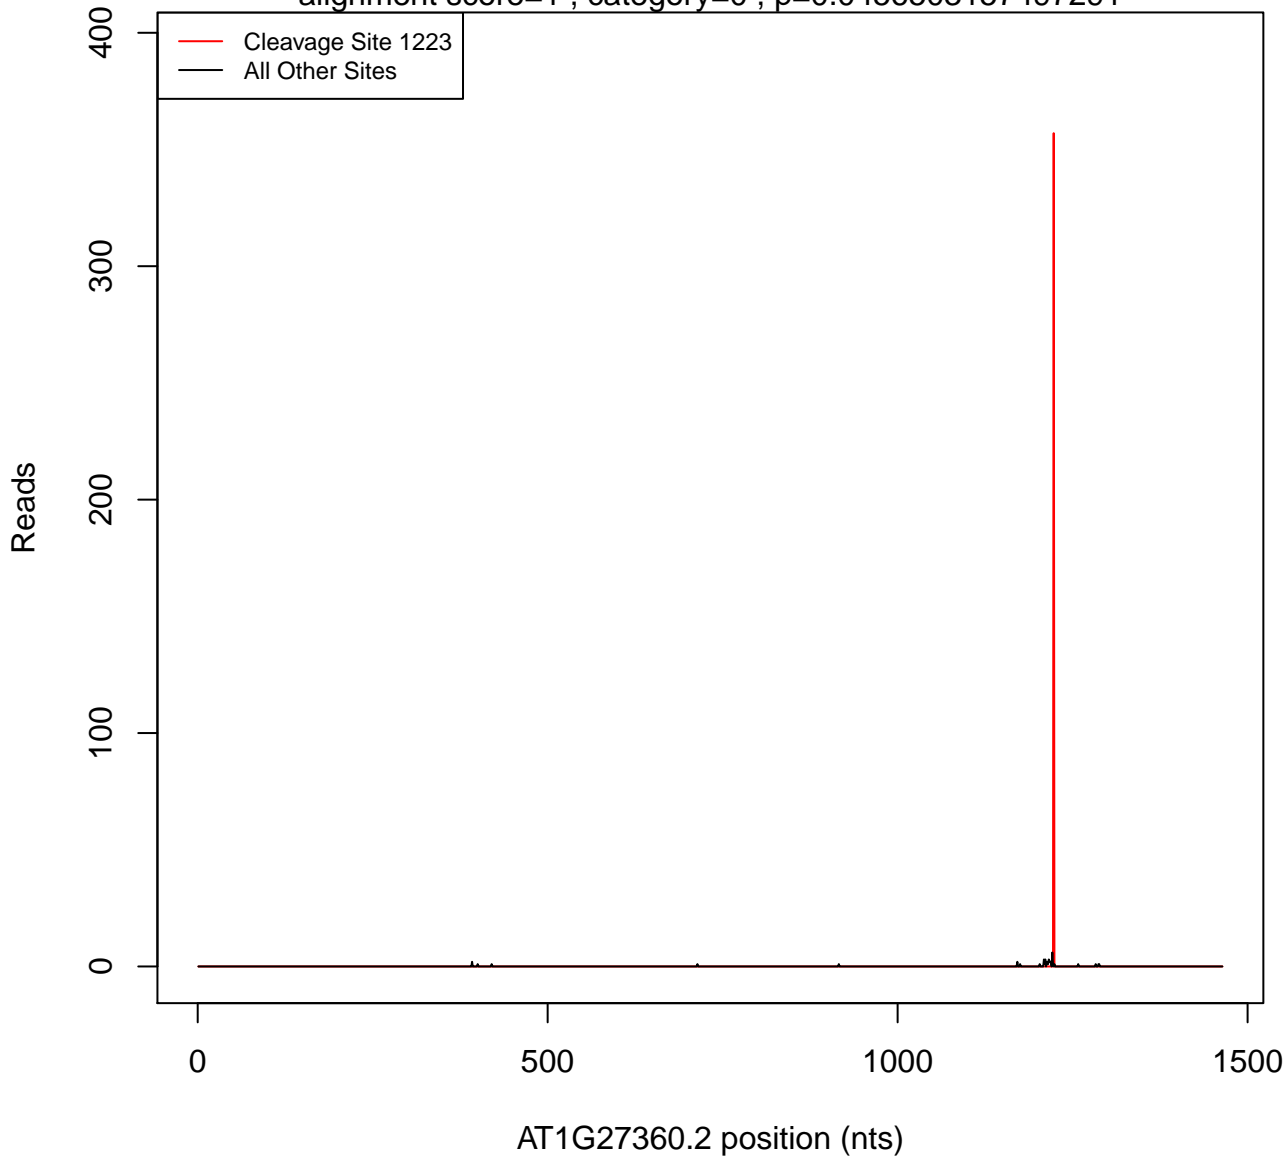

# ath-miR156e slicing AT1G27360.2 at nt 1223

alignment score=1 , category=0 , p=0.0456503157497291



# ath-miR156f slicing AT1G27360.2 at nt 1223

alignment score=1 , category=0 , p=0.0456503157497291



# ath-miR156g slicing AT1G27360.2 at nt 1223

alignment score=2 , category=0 , p=0.0387652739078221

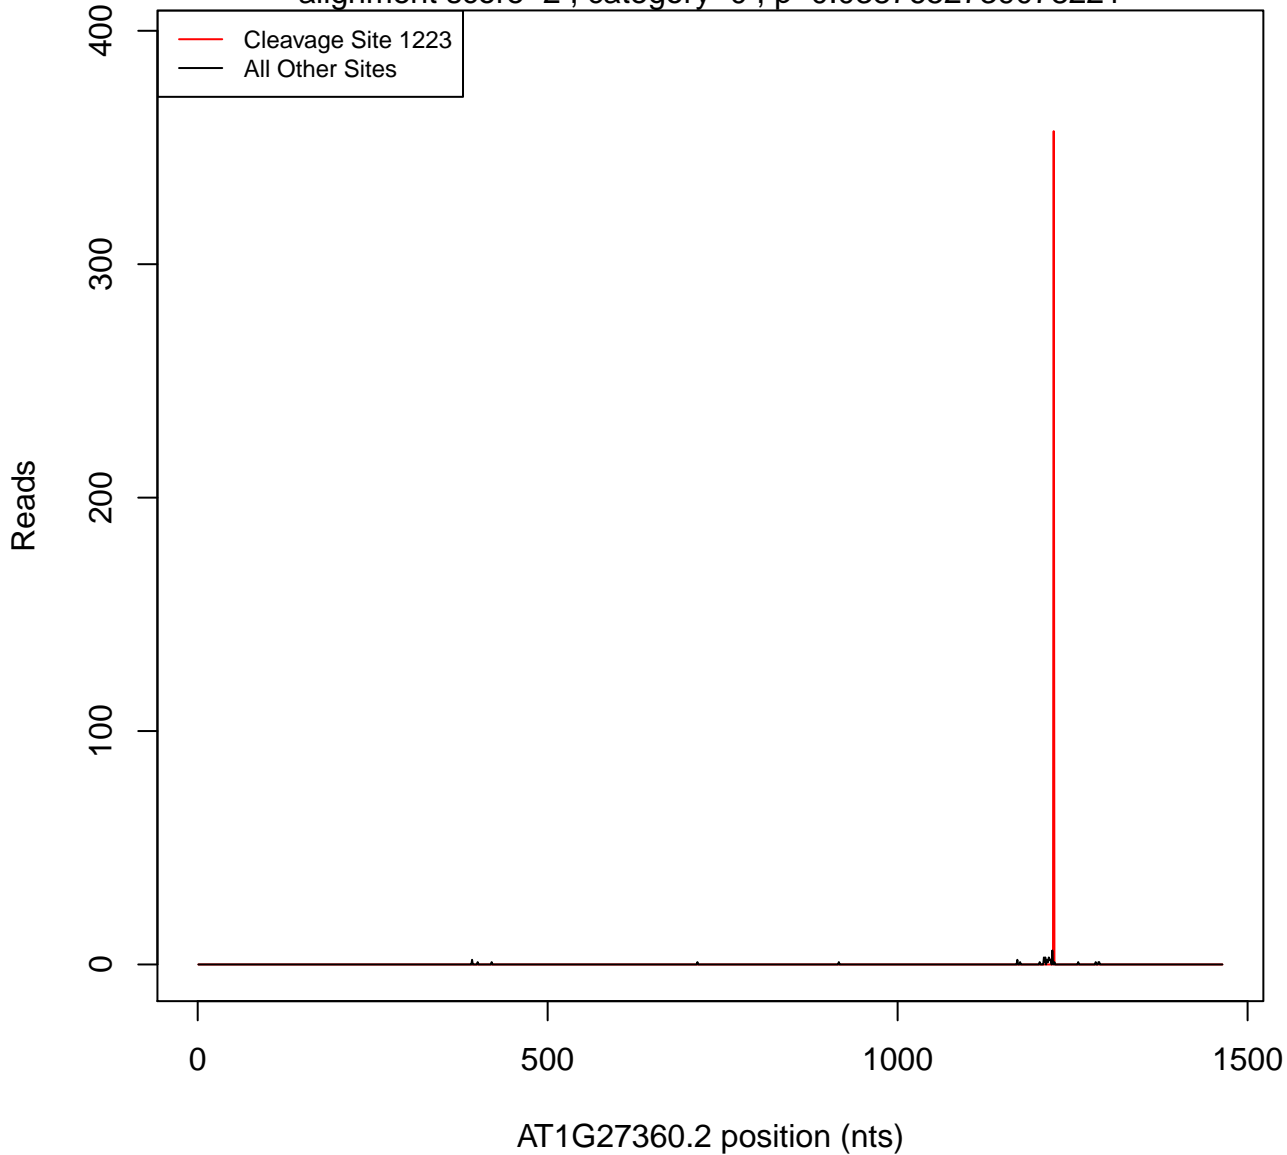

# ath-miR156h slicing AT1G27360.2 at nt 1223

alignment score=2 , category=0 , p=0.0432259504343167

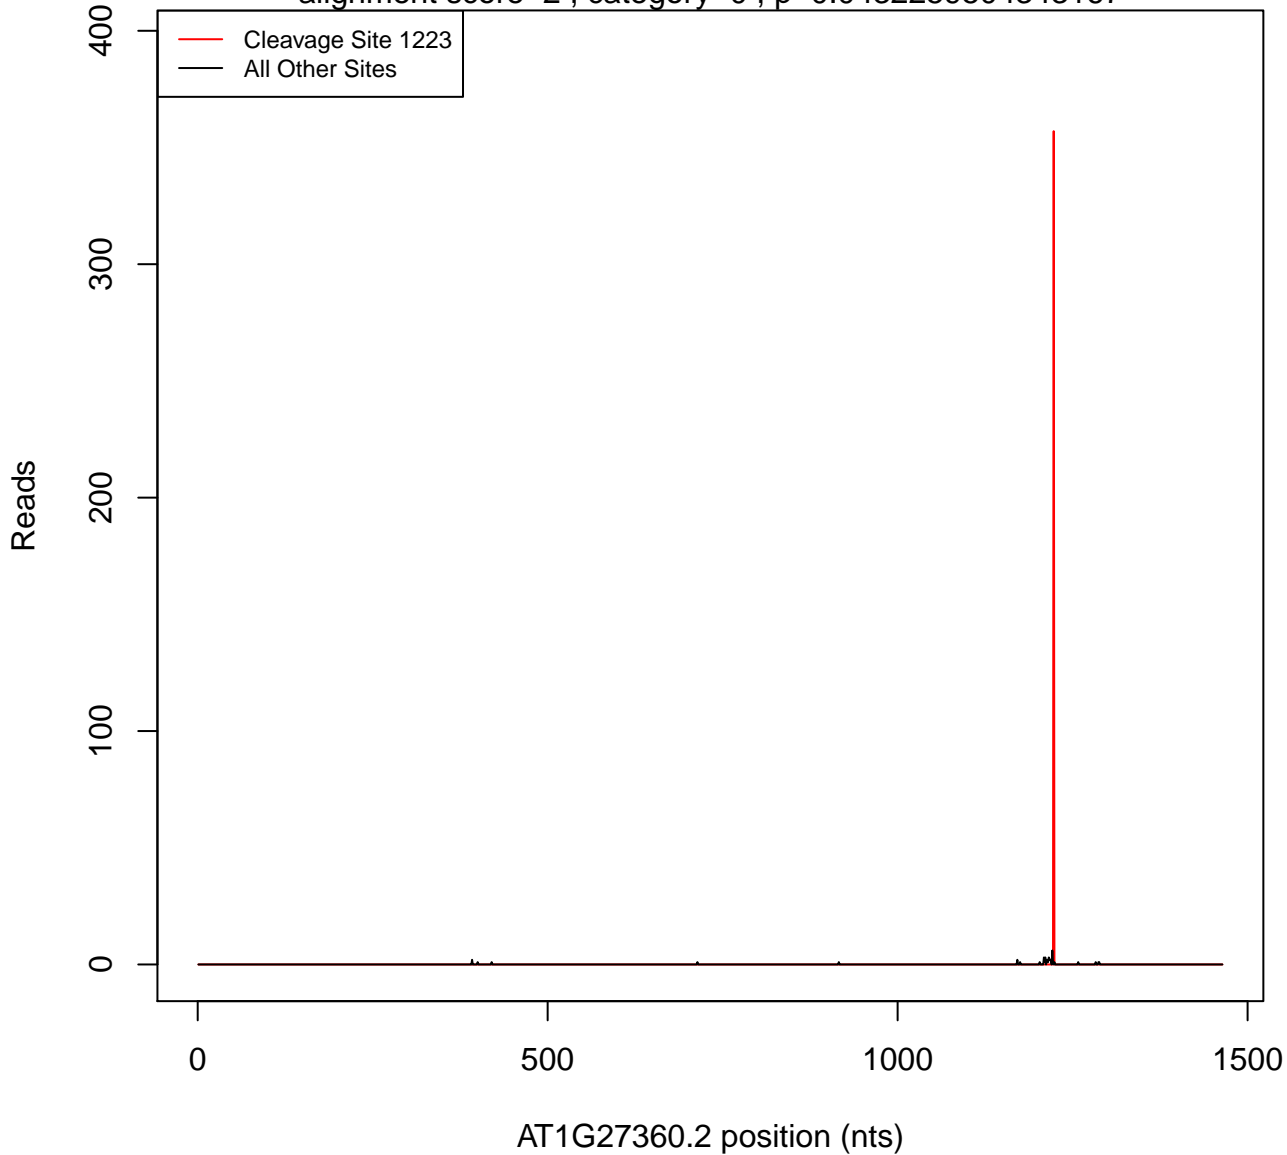

# ath-miR156i slicing AT1G27360.2 at nt 1223

alignment score=1 , category=0 , p=0.0482697796921467

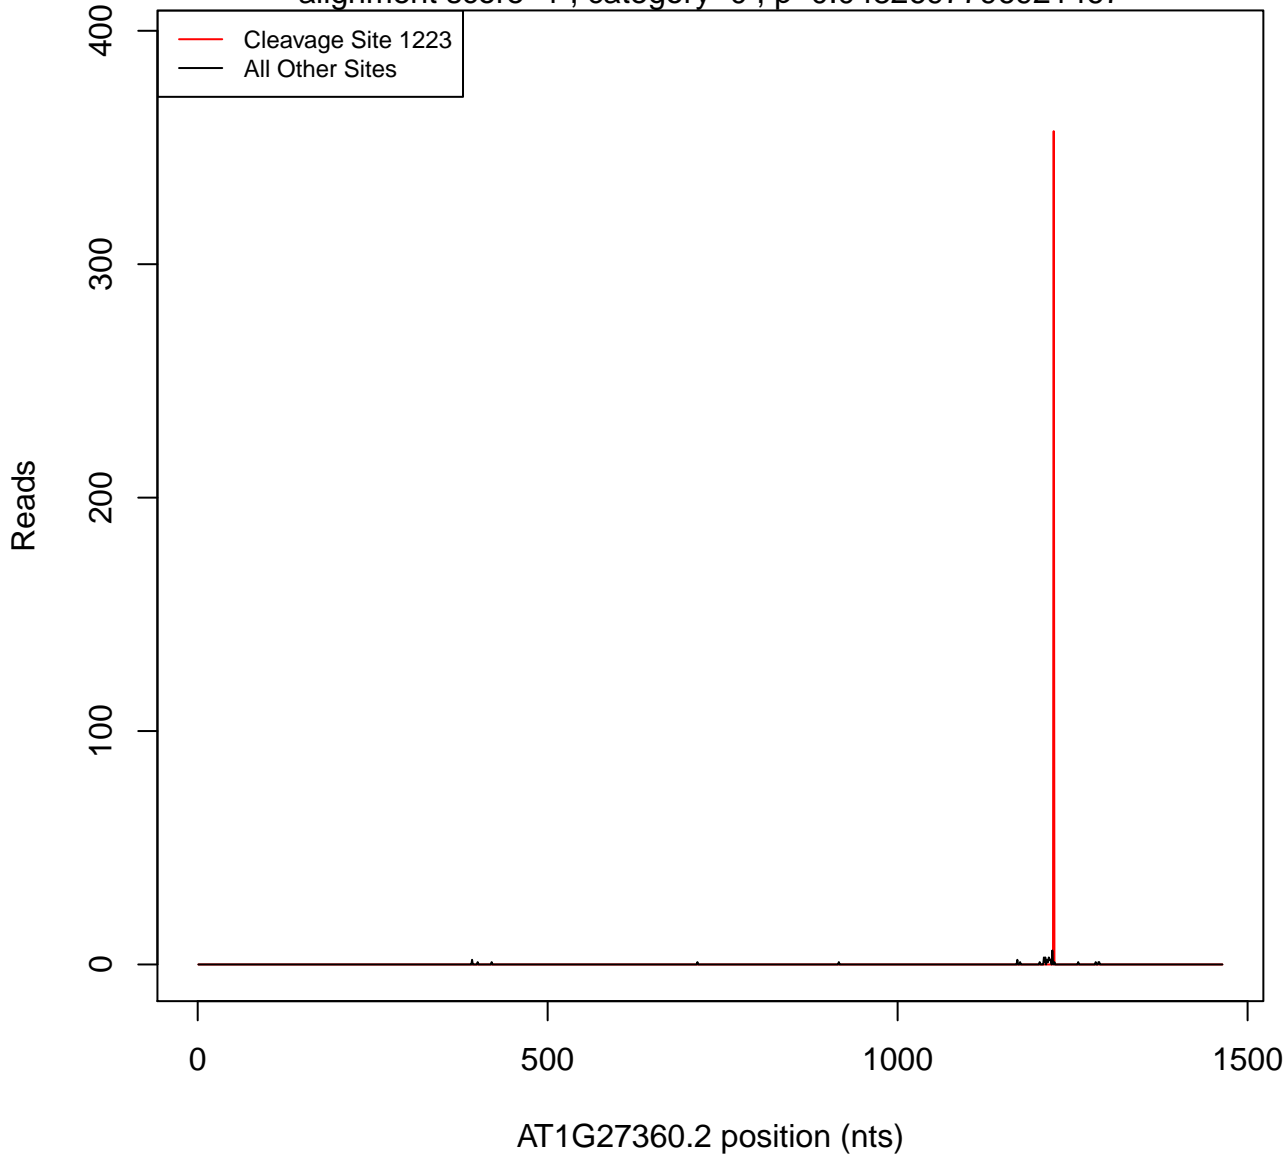



# ath-miR156j slicing AT1G27360.2 at nt 1223

alignment score=0 , category=0 , p=0.0524860420603949

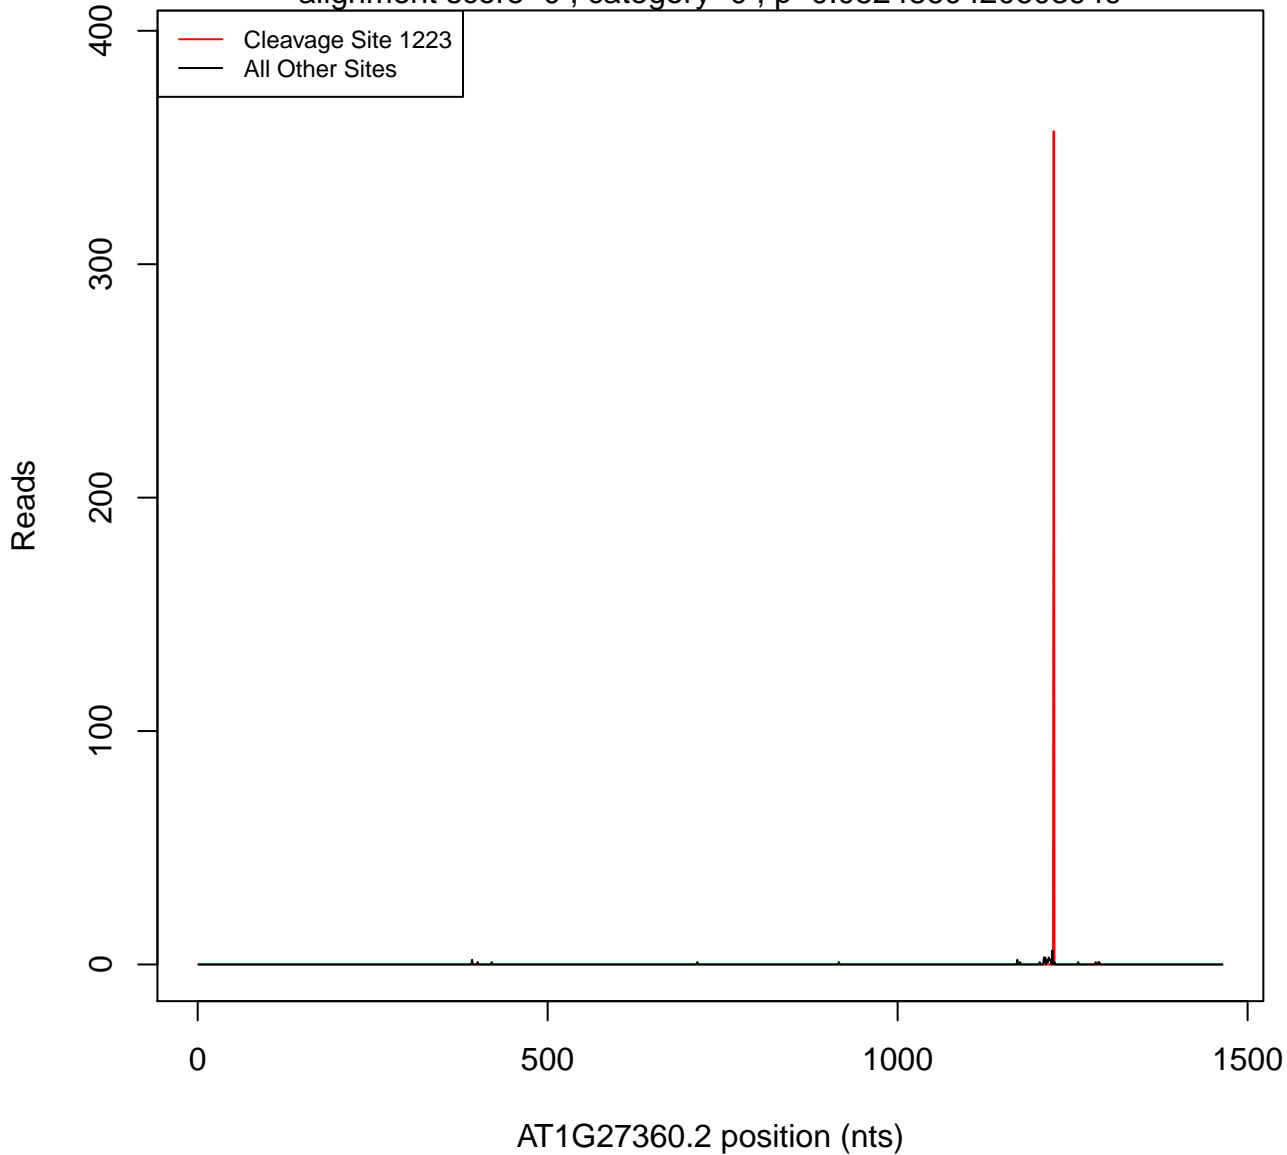

# ath-miR157d slicing AT1G27360.2 at nt 1223

alignment score=2 , category=0 , p=0.0432259504343167



# ath-miR156a slicing AT1G27360.3 at nt 1250

alignment score=1 , category=0 , p=0.0456503157497291

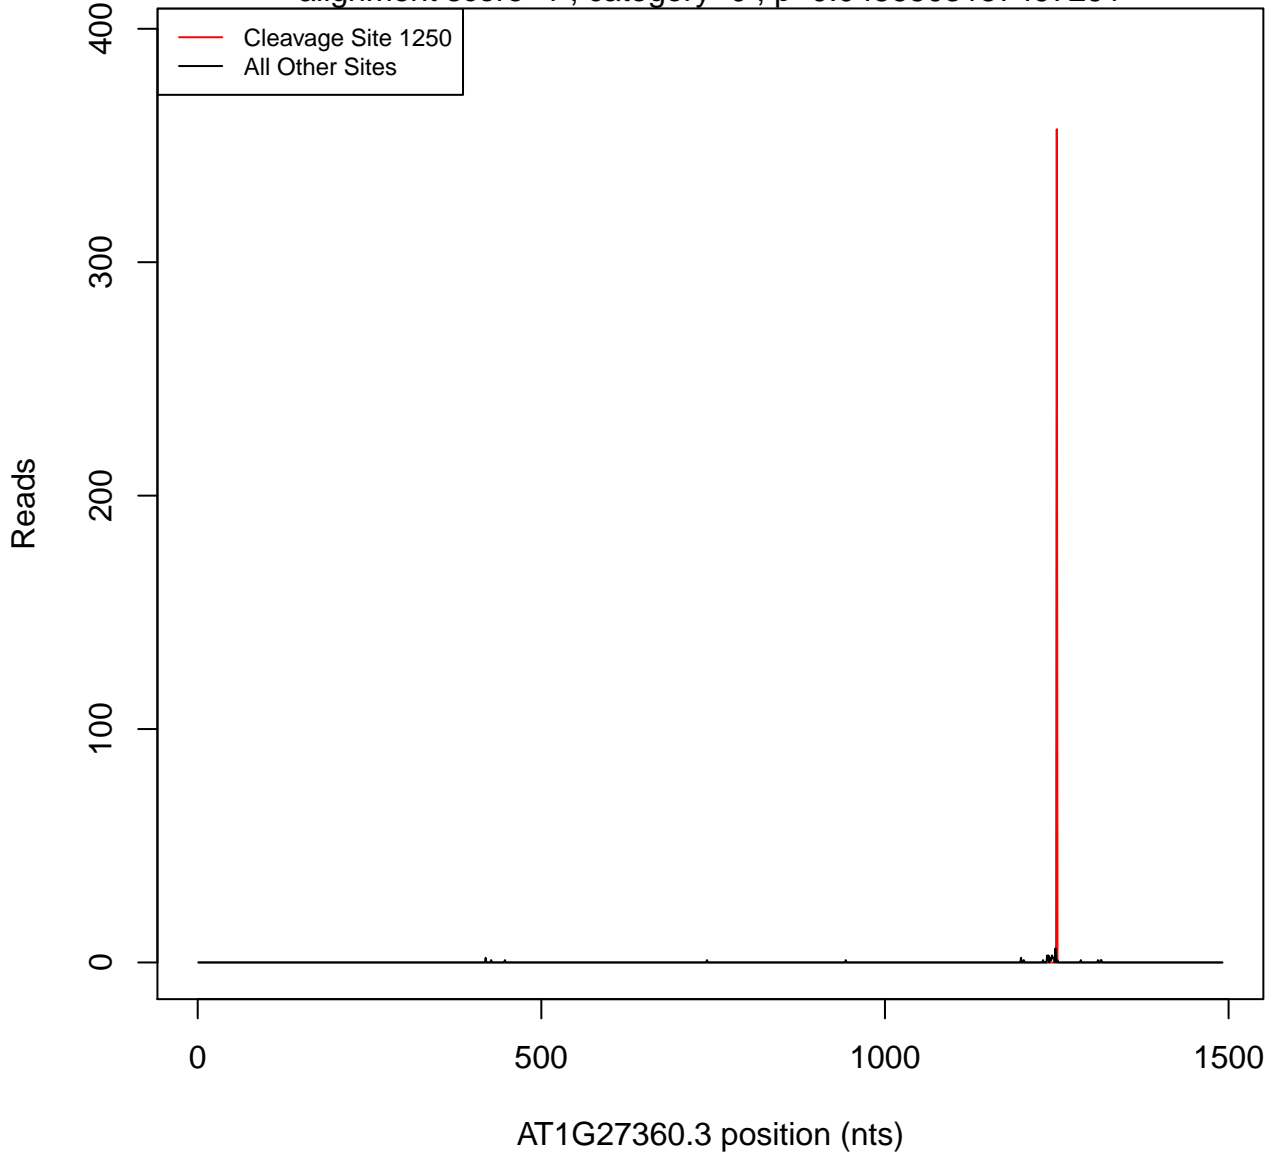

# ath-miR156b slicing AT1G27360.3 at nt 1250

alignment score=1 , category=0 , p=0.0456503157497291

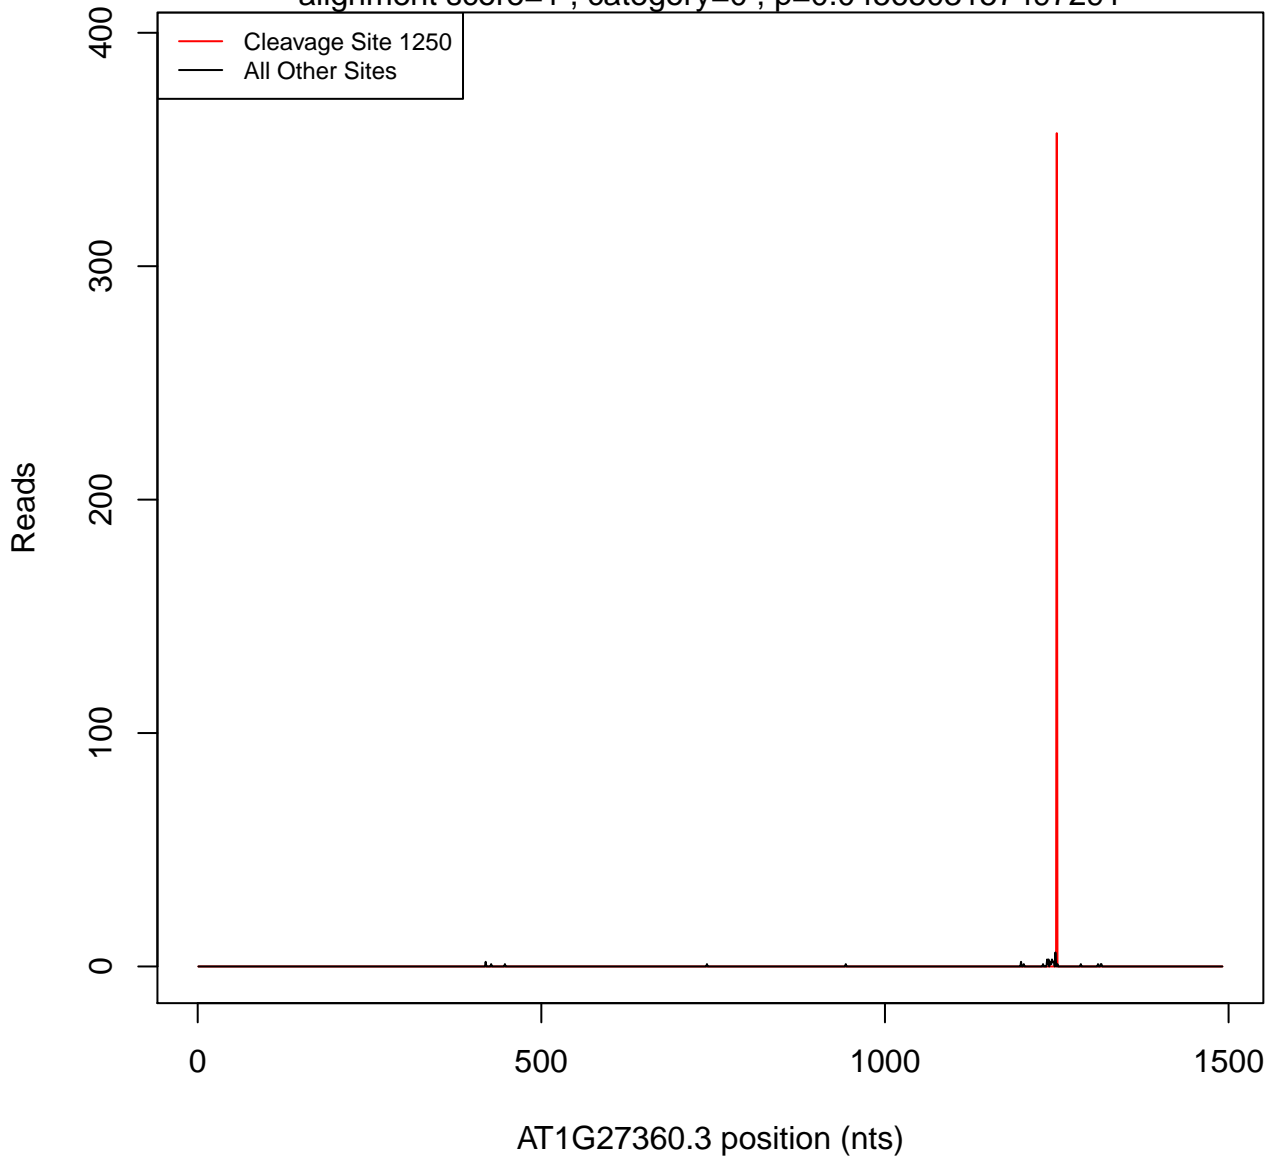

# ath-miR156c slicing AT1G27360.3 at nt 1250

alignment score=1 , category=0 , p=0.0456503157497291



# ath-miR156d slicing AT1G27360.3 at nt 1250

alignment score=1 , category=0 , p=0.0456503157497291

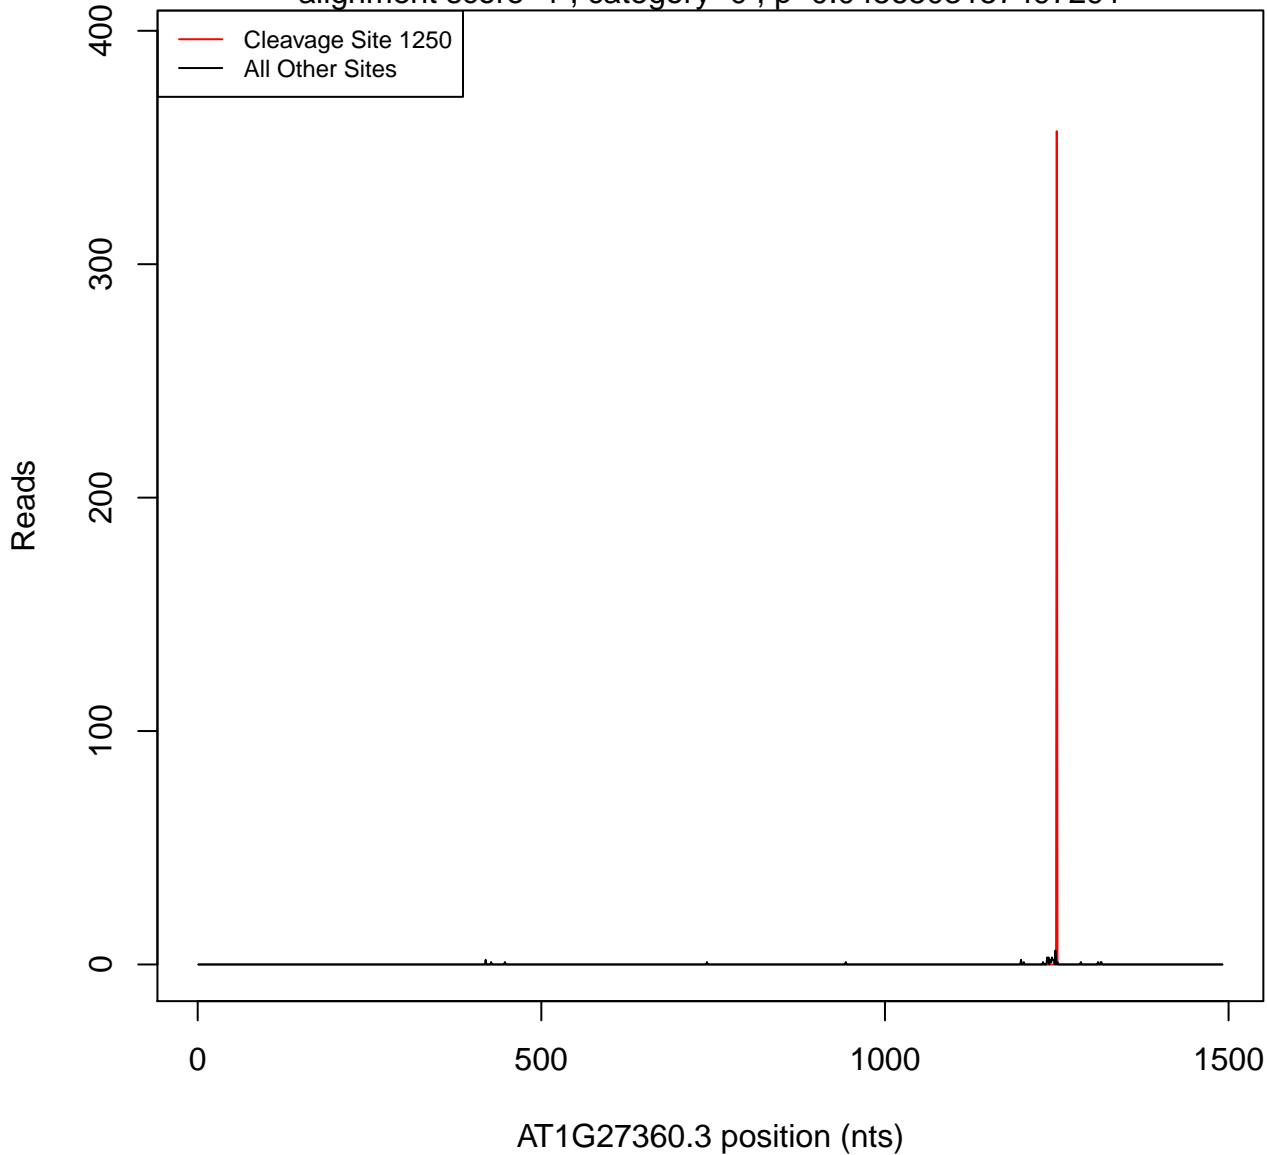

# ath-miR156e slicing AT1G27360.3 at nt 1250

alignment score=1 , category=0 , p=0.0456503157497291



# ath-miR156f slicing AT1G27360.3 at nt 1250

alignment score=1 , category=0 , p=0.0456503157497291





# ath-miR156g slicing AT1G27360.3 at nt 1250

alignment score=2 , category=0 , p=0.0387652739078221

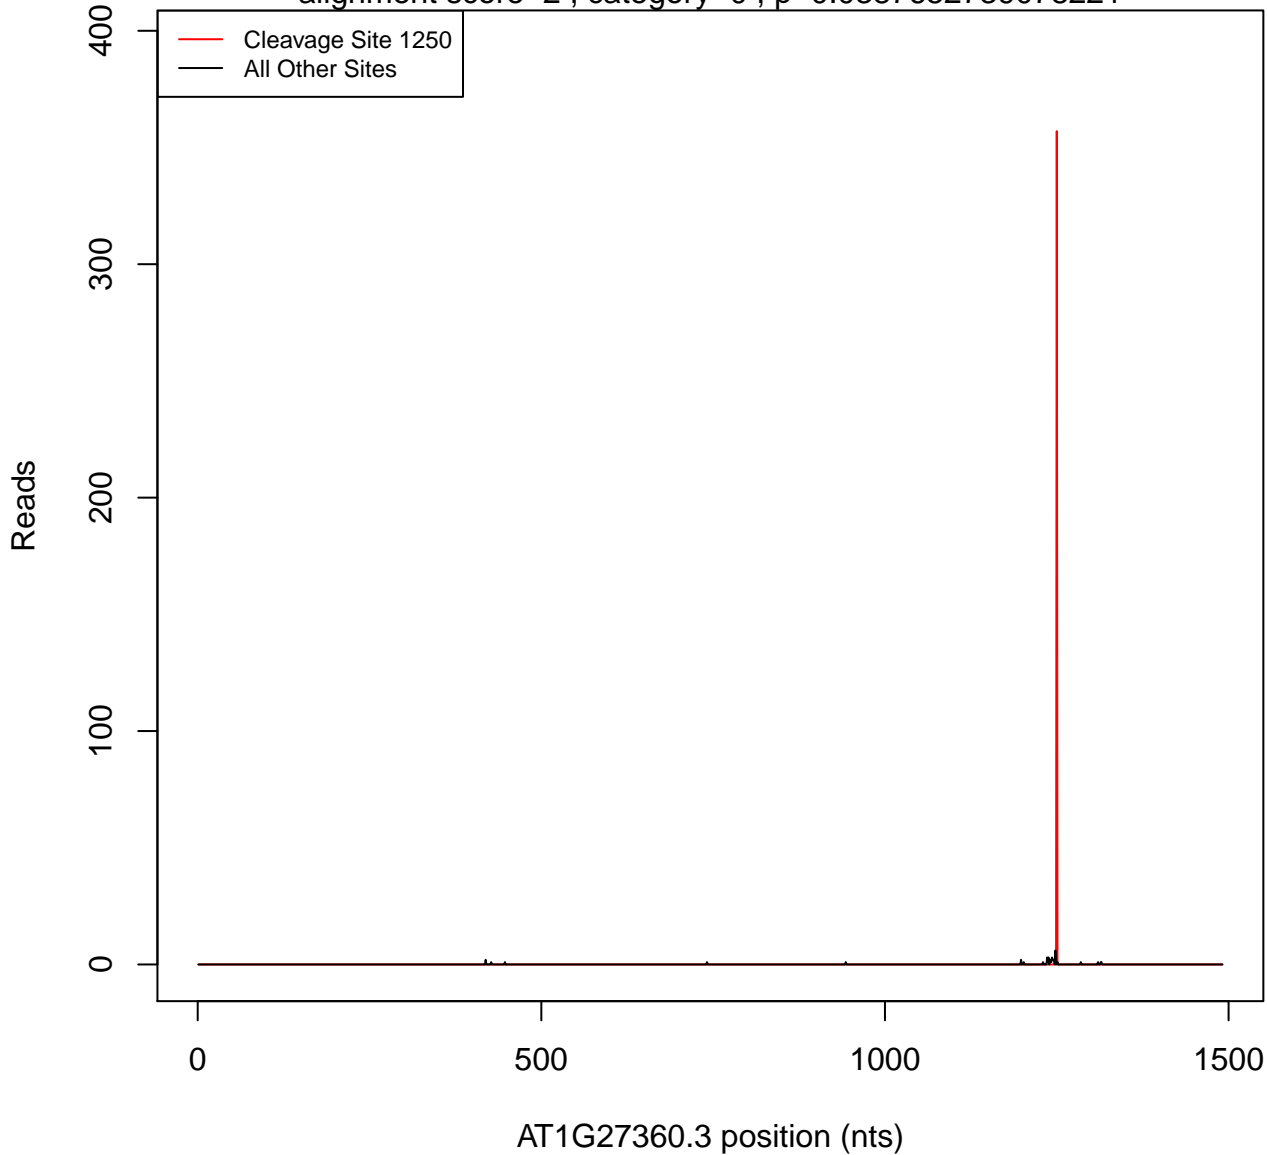

# ath-miR156h slicing AT1G27360.3 at nt 1250

alignment score=2 , category=0 , p=0.0432259504343167

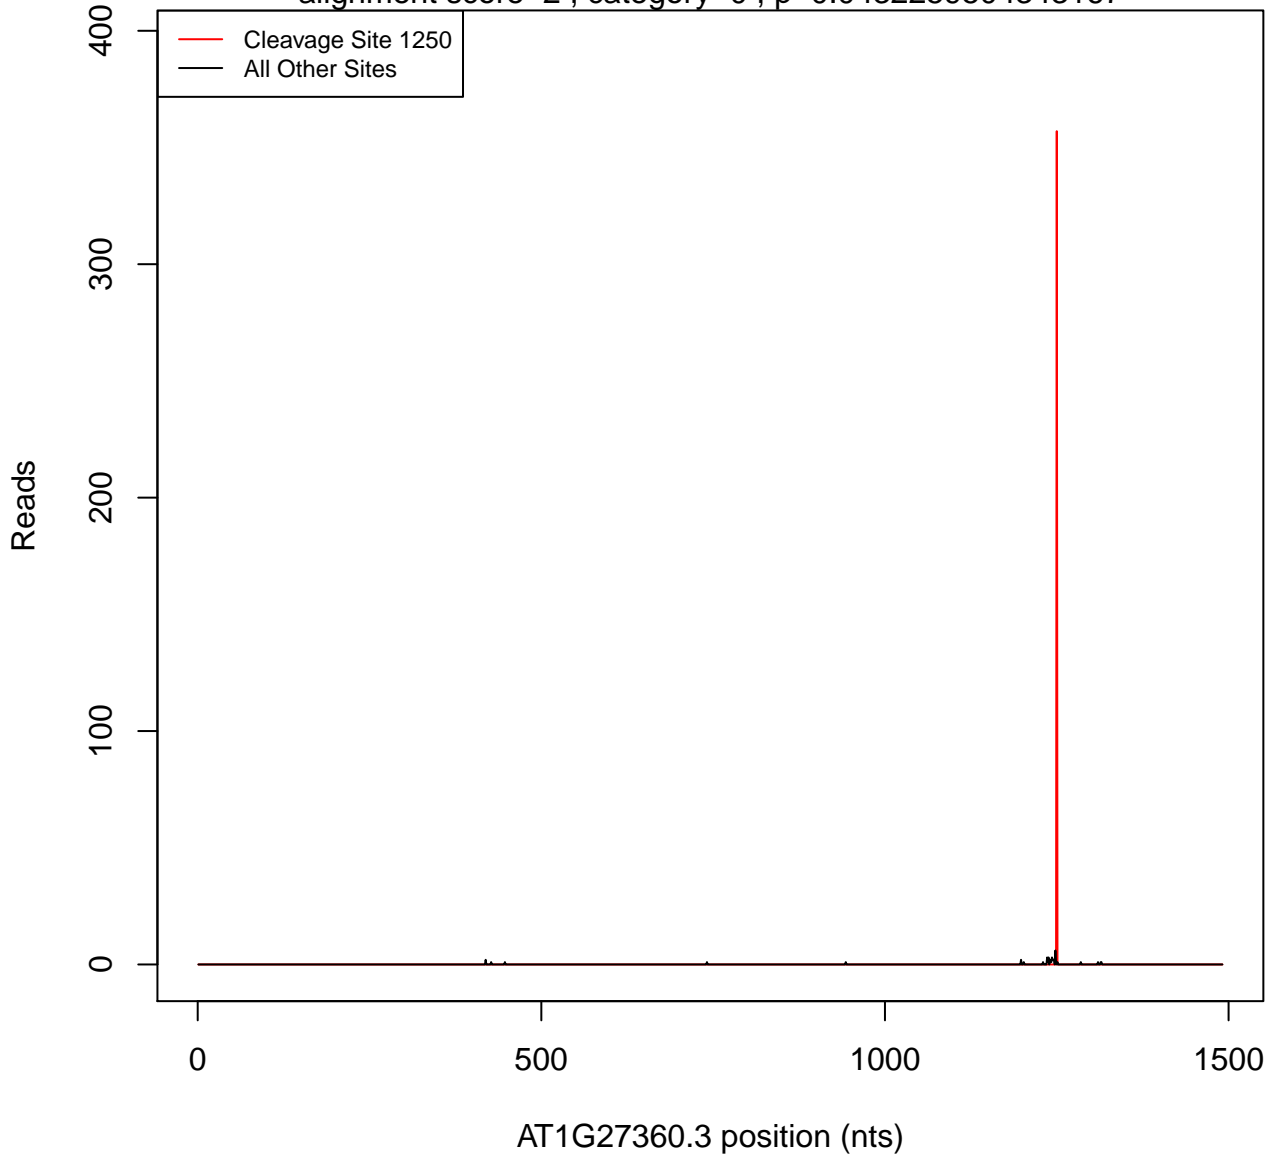

# ath-miR156i slicing AT1G27360.3 at nt 1250

alignment score=1 , category=0 , p=0.0482697796921467

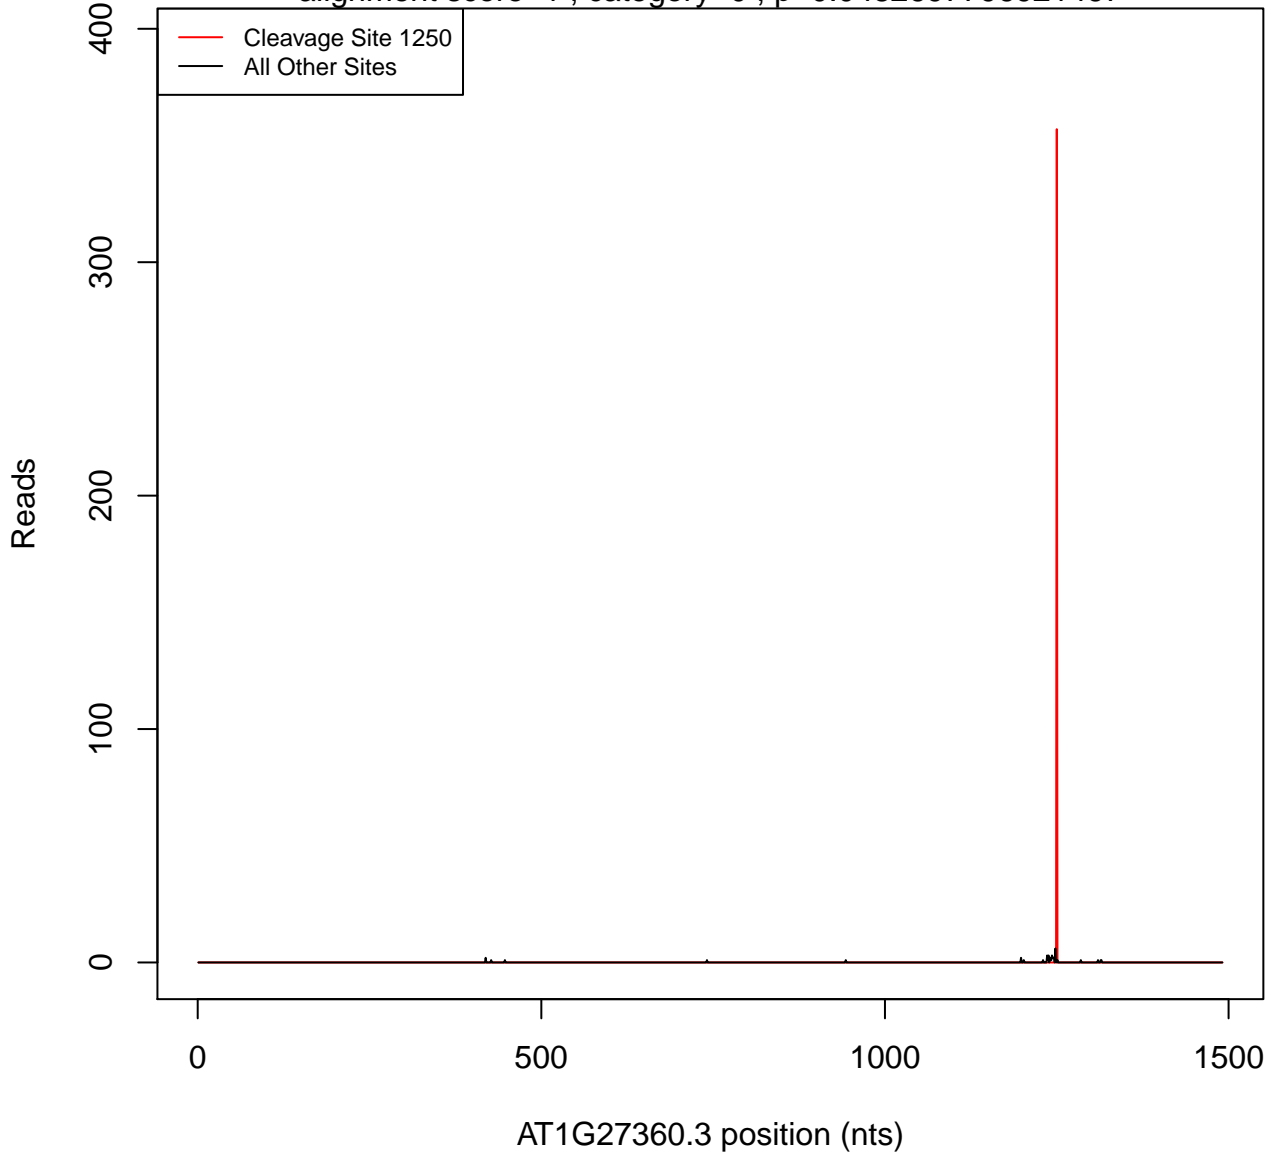

# ath-miR156j slicing AT1G27360.3 at nt 1250

alignment score=0 , category=0 , p=0.0524860420603949

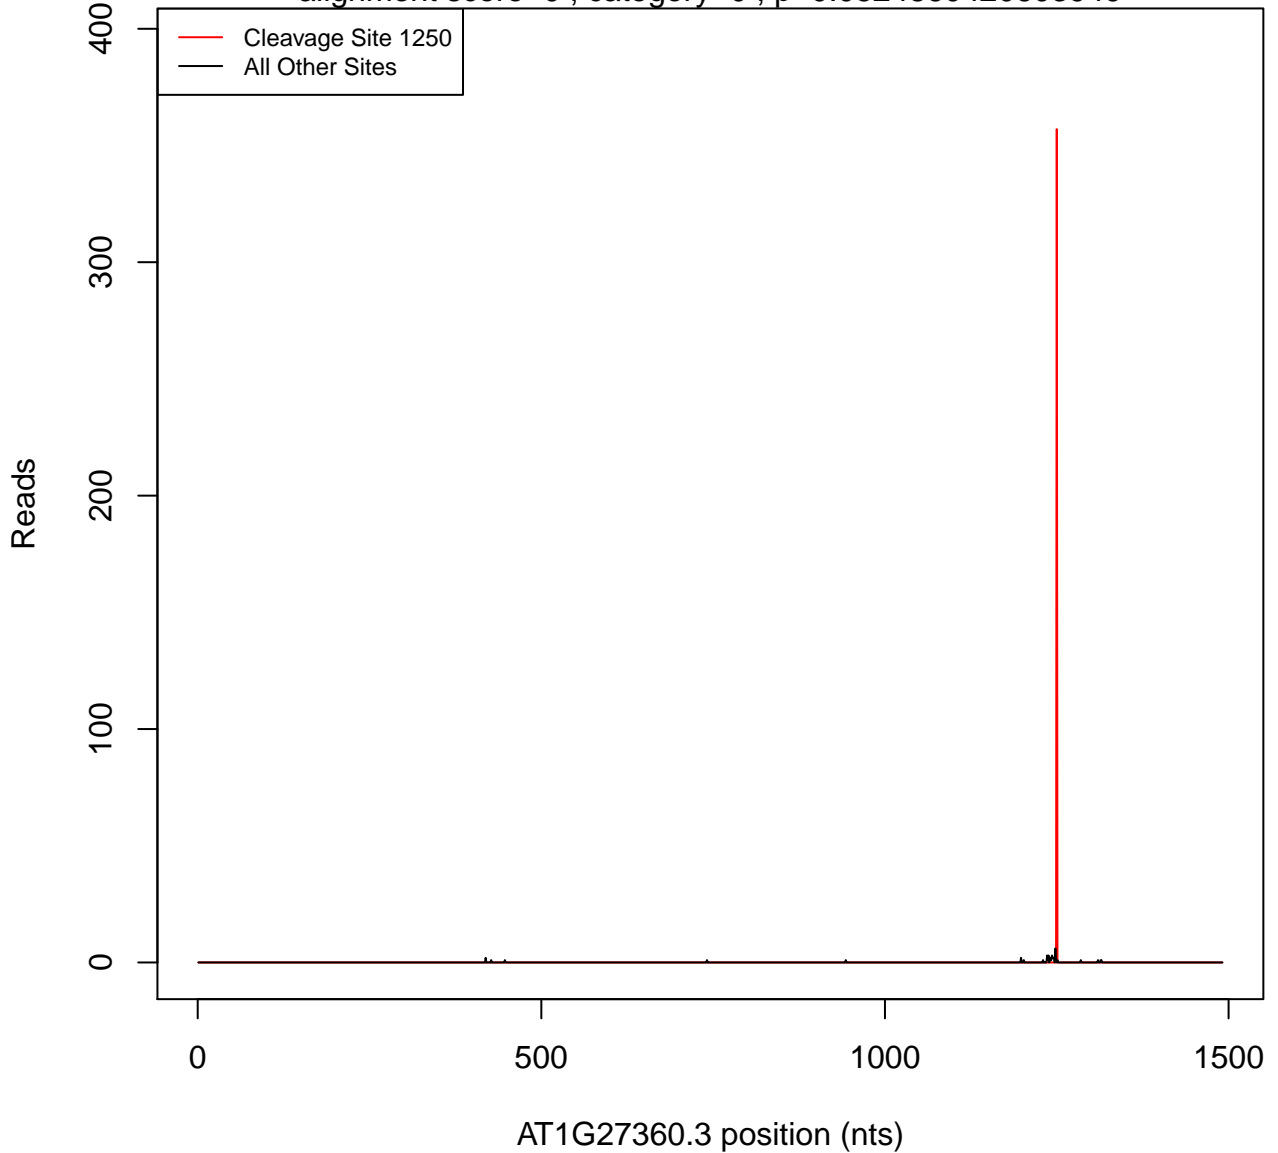

# ath-miR157d slicing AT1G27360.3 at nt 1250

alignment score=2 , category=0 , p=0.0432259504343167



# ath-miR156a slicing AT1G27360.4 at nt 1310

alignment score=1 , category=0 , p=0.0456503157497291

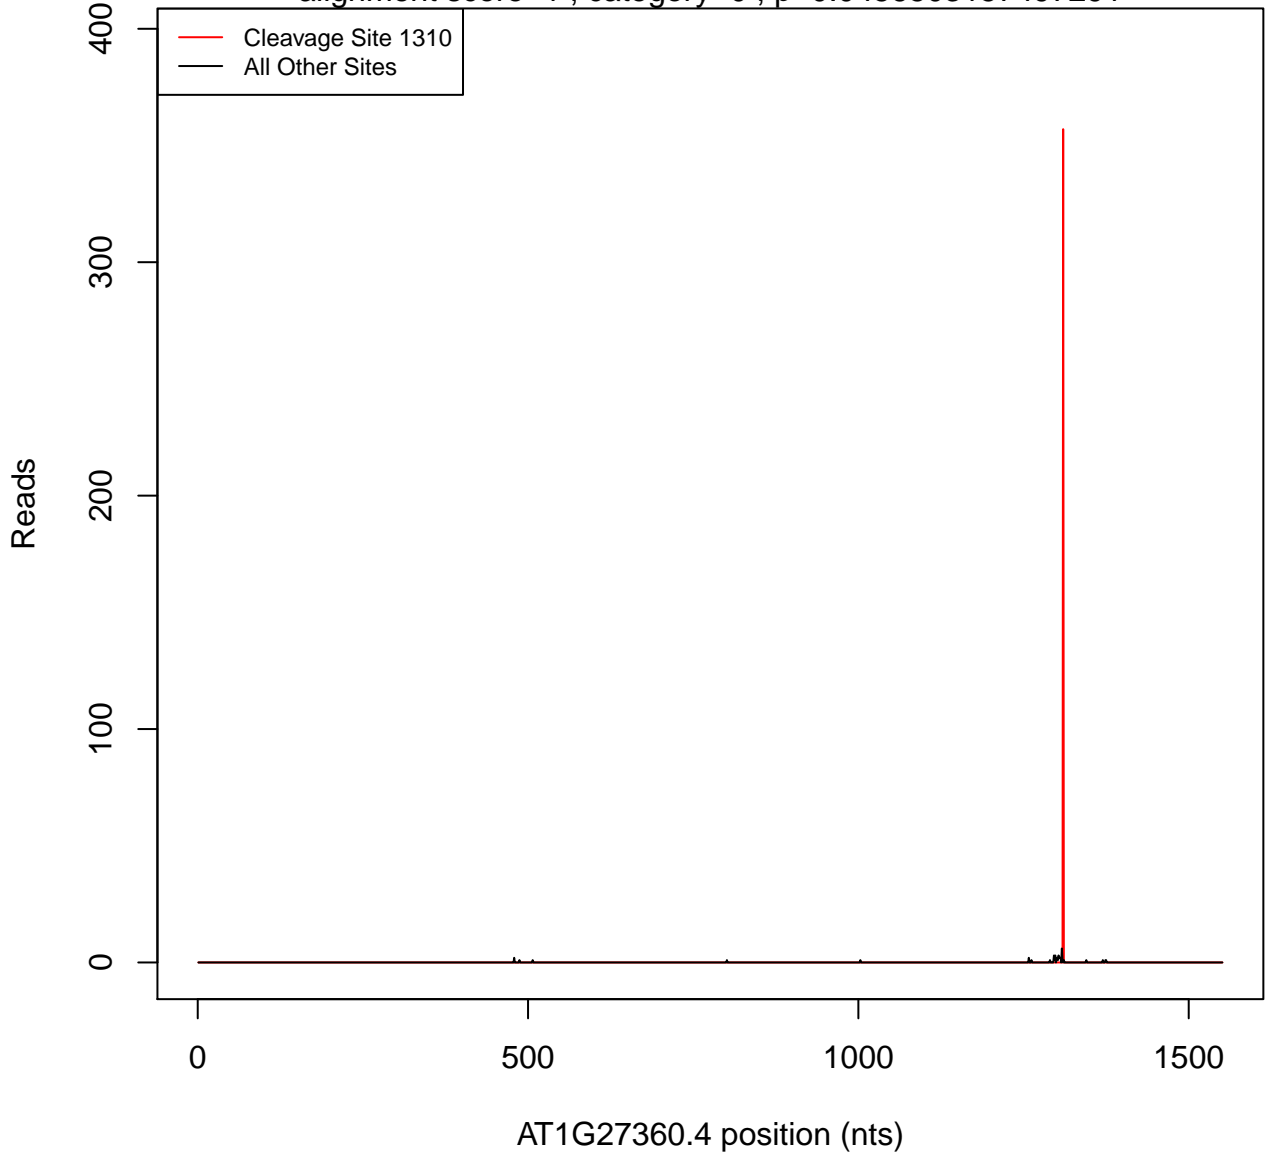

# ath-miR156b slicing AT1G27360.4 at nt 1310

alignment score=1 , category=0 , p=0.0456503157497291

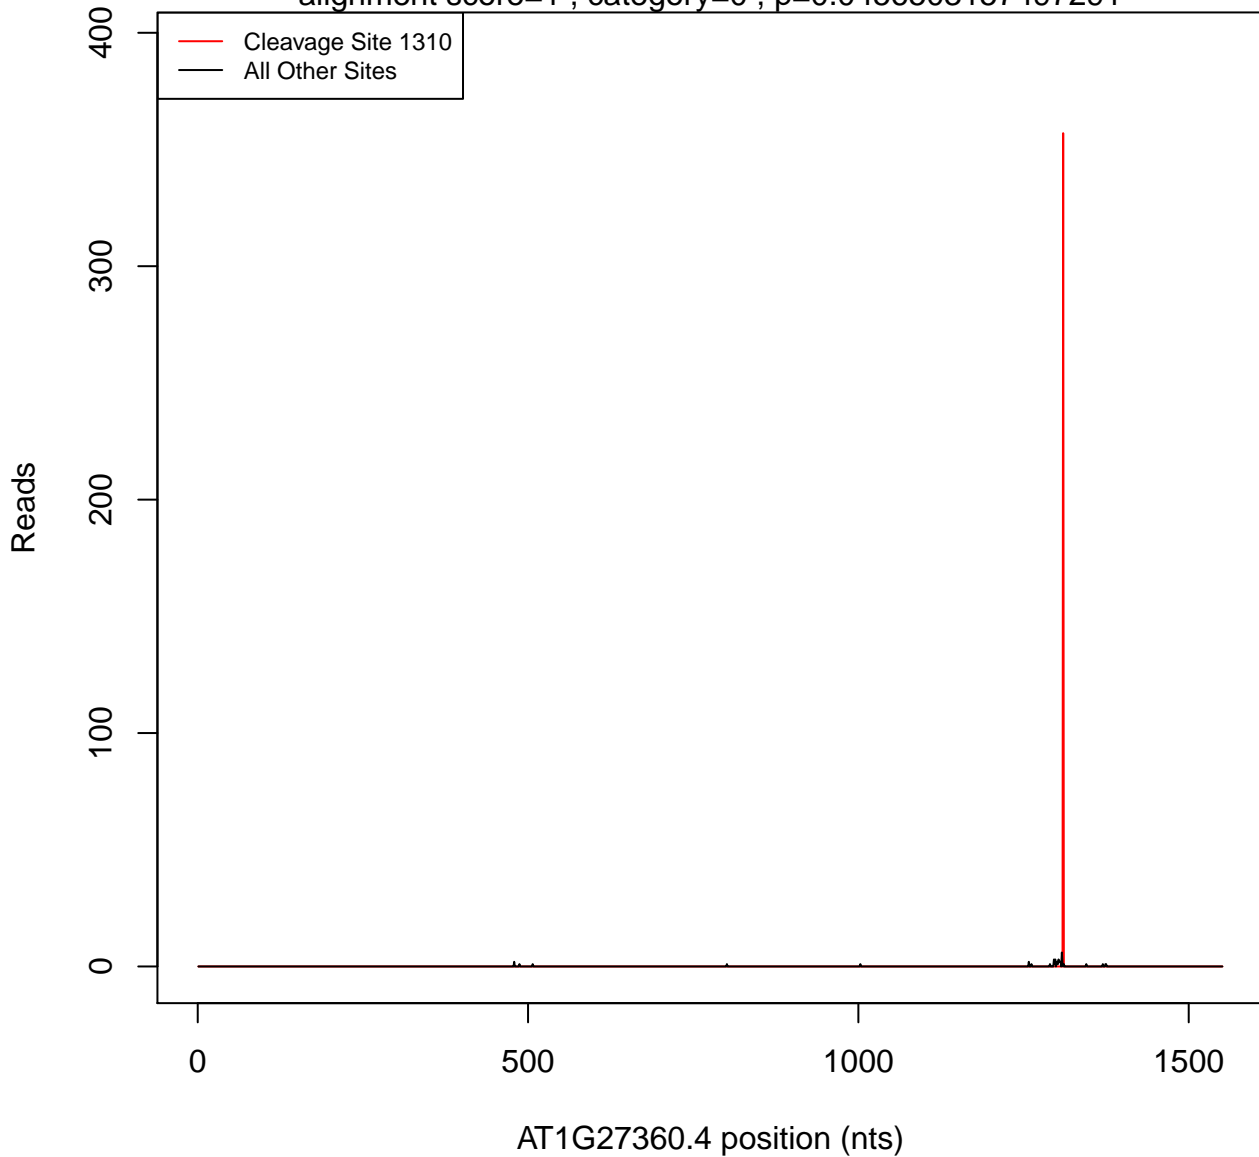

# ath-miR156c slicing AT1G27360.4 at nt 1310

alignment score=1 , category=0 , p=0.0456503157497291





# ath-miR156d slicing AT1G27360.4 at nt 1310

alignment score=1 , category=0 , p=0.0456503157497291

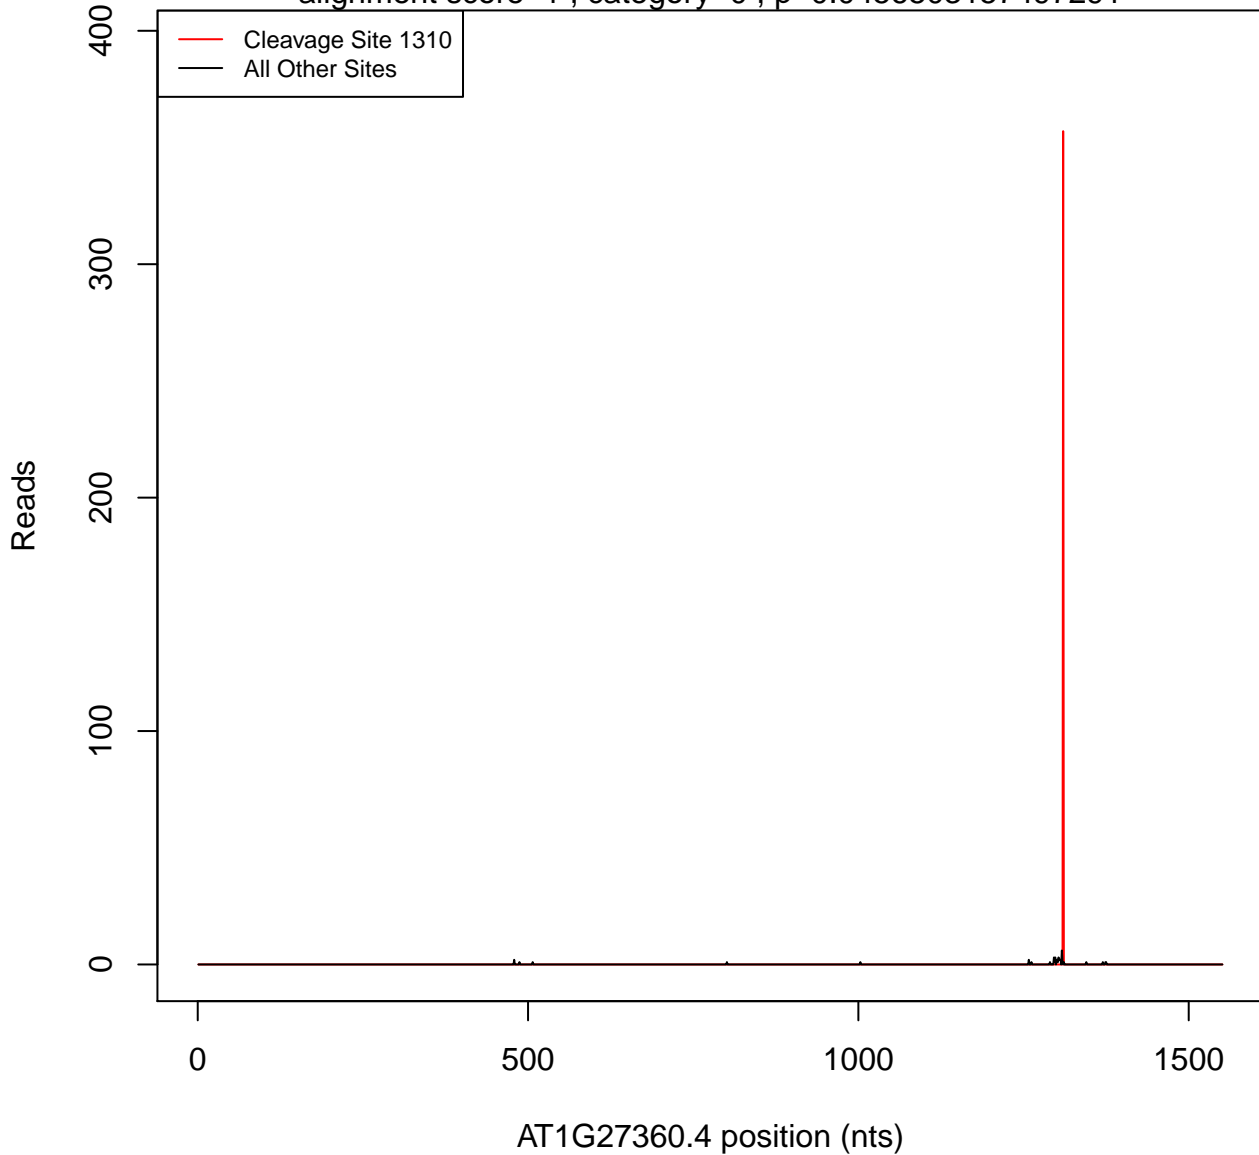

# ath-miR156e slicing AT1G27360.4 at nt 1310

alignment score=1 , category=0 , p=0.0456503157497291



# ath-miR156f slicing AT1G27360.4 at nt 1310

alignment score=1 , category=0 , p=0.0456503157497291



# ath-miR156g slicing AT1G27360.4 at nt 1310

alignment score=2 , category=0 , p=0.0387652739078221

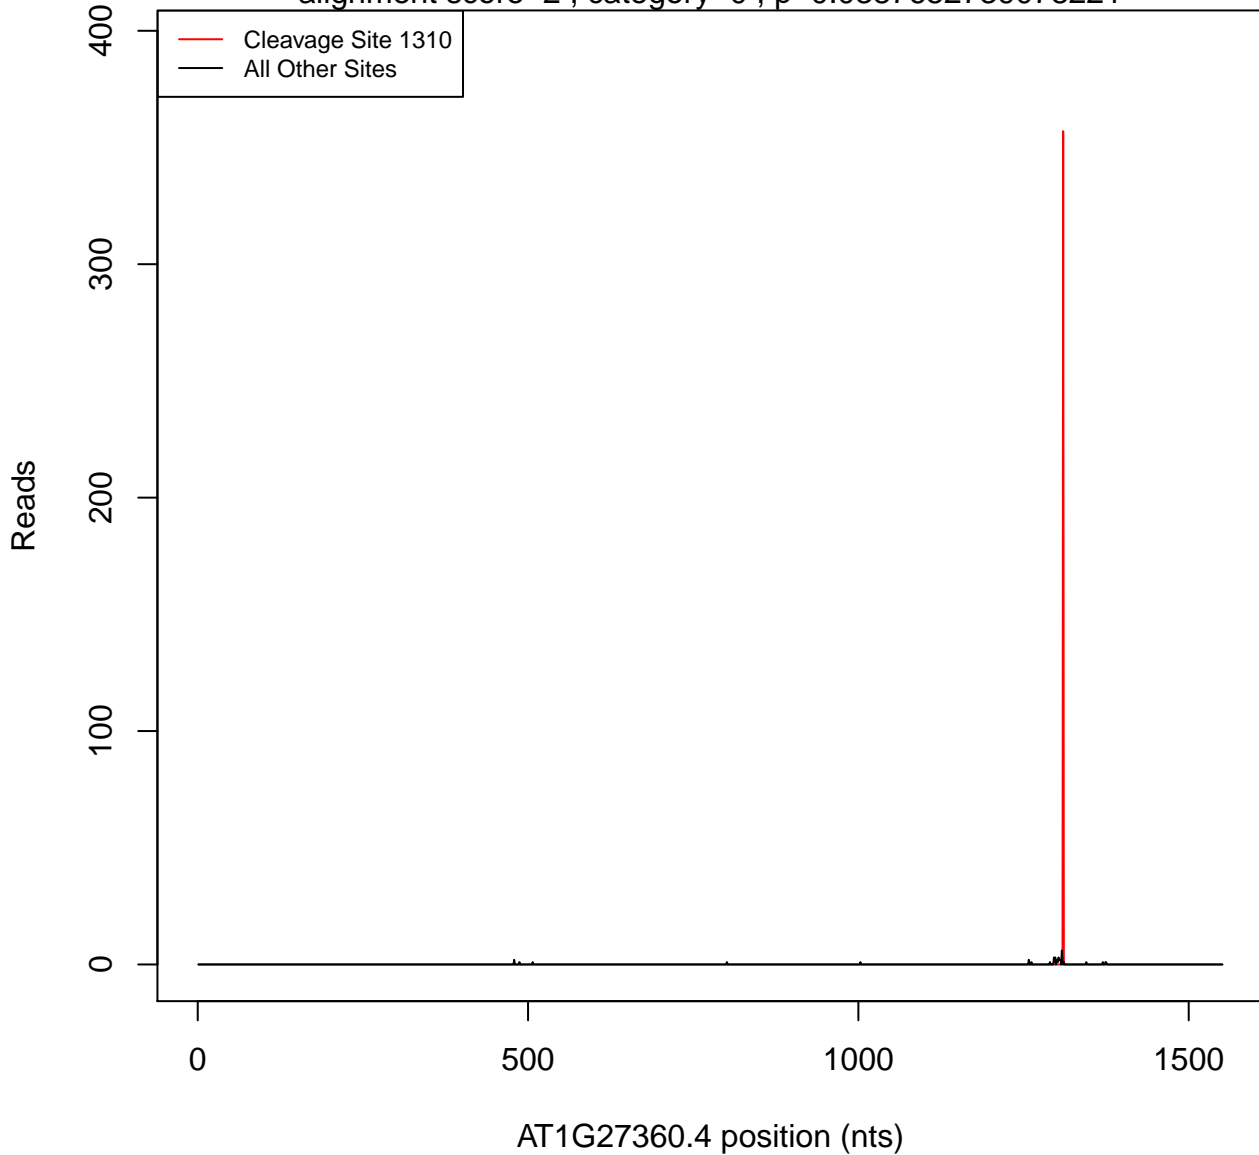

# ath-miR156h slicing AT1G27360.4 at nt 1310

alignment score=2 , category=0 , p=0.0432259504343167

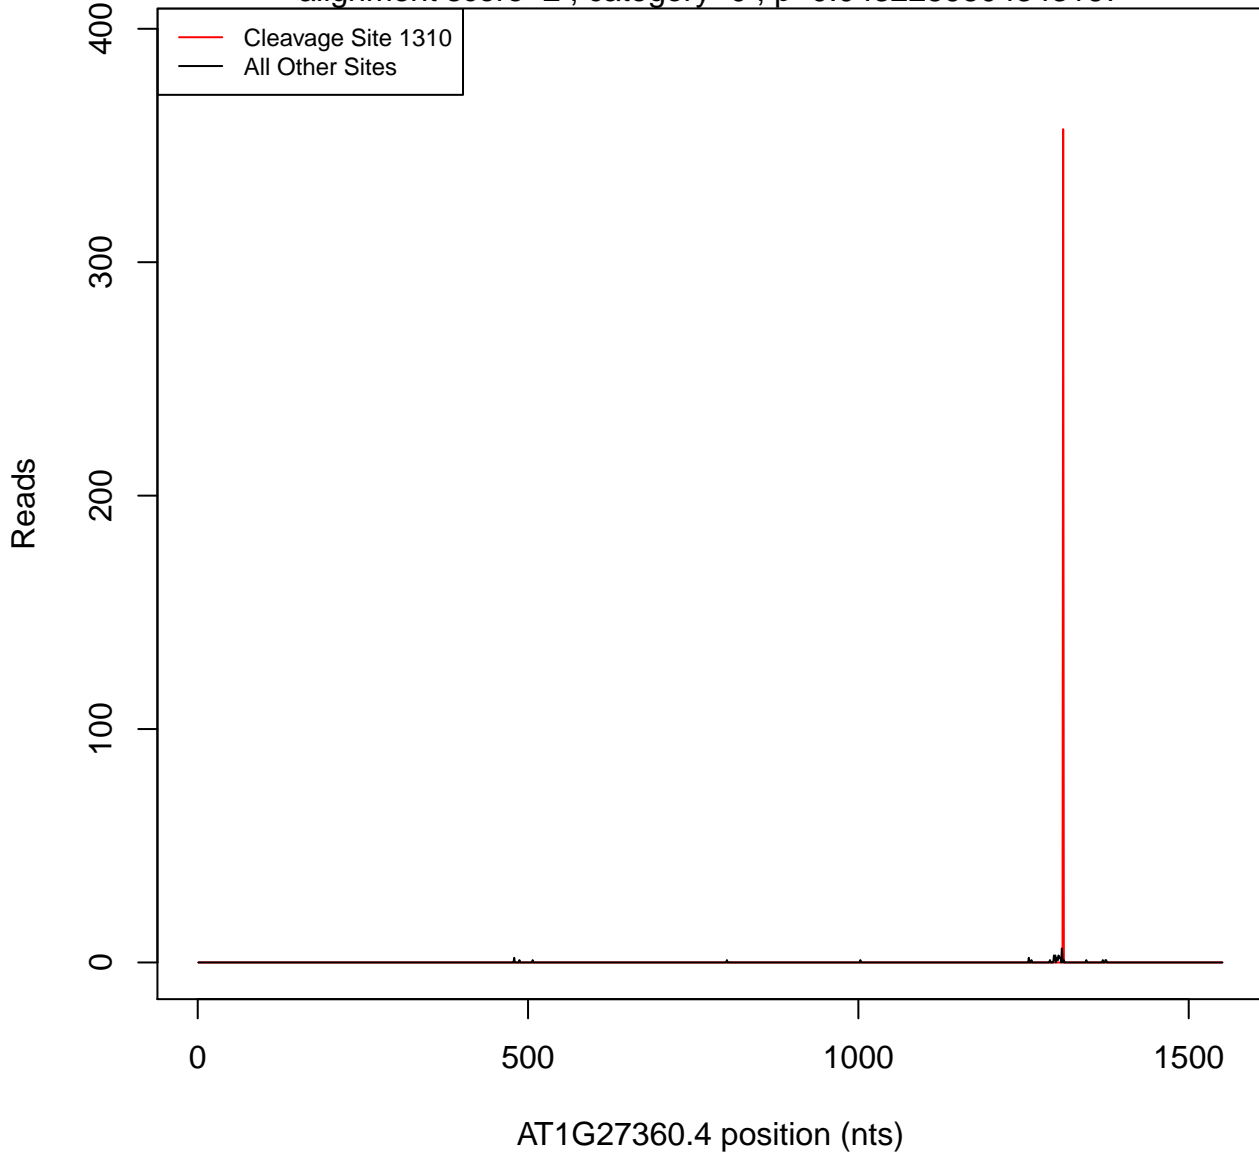

# ath-miR156i slicing AT1G27360.4 at nt 1310

alignment score=1 , category=0 , p=0.0482697796921467

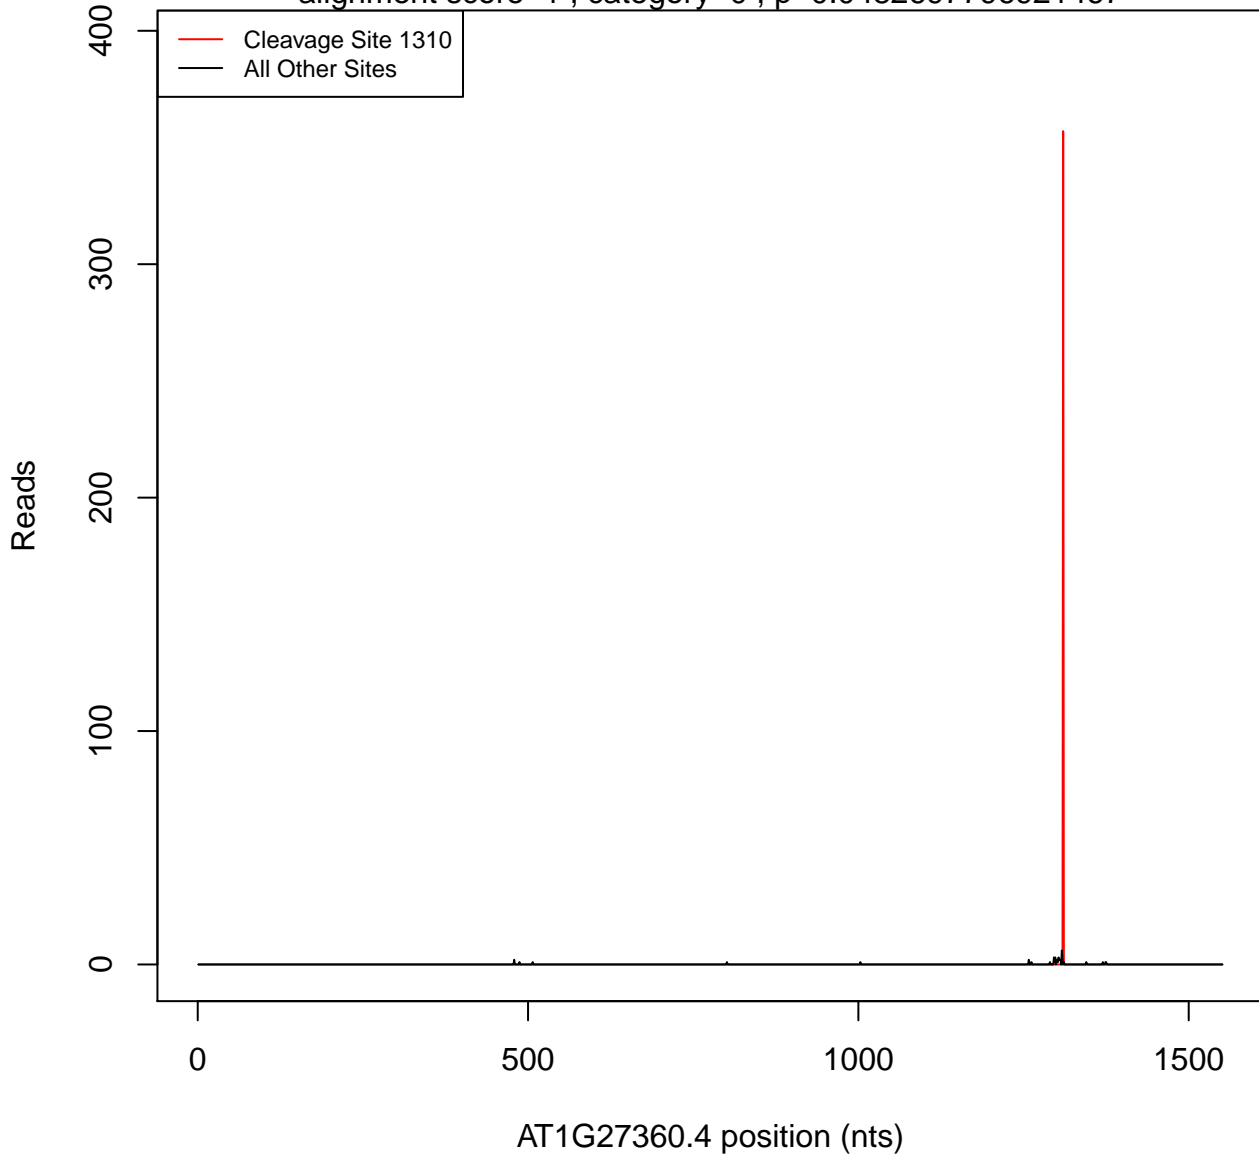

# ath-miR156j slicing AT1G27360.4 at nt 1310

alignment score=0 , category=0 , p=0.0524860420603949

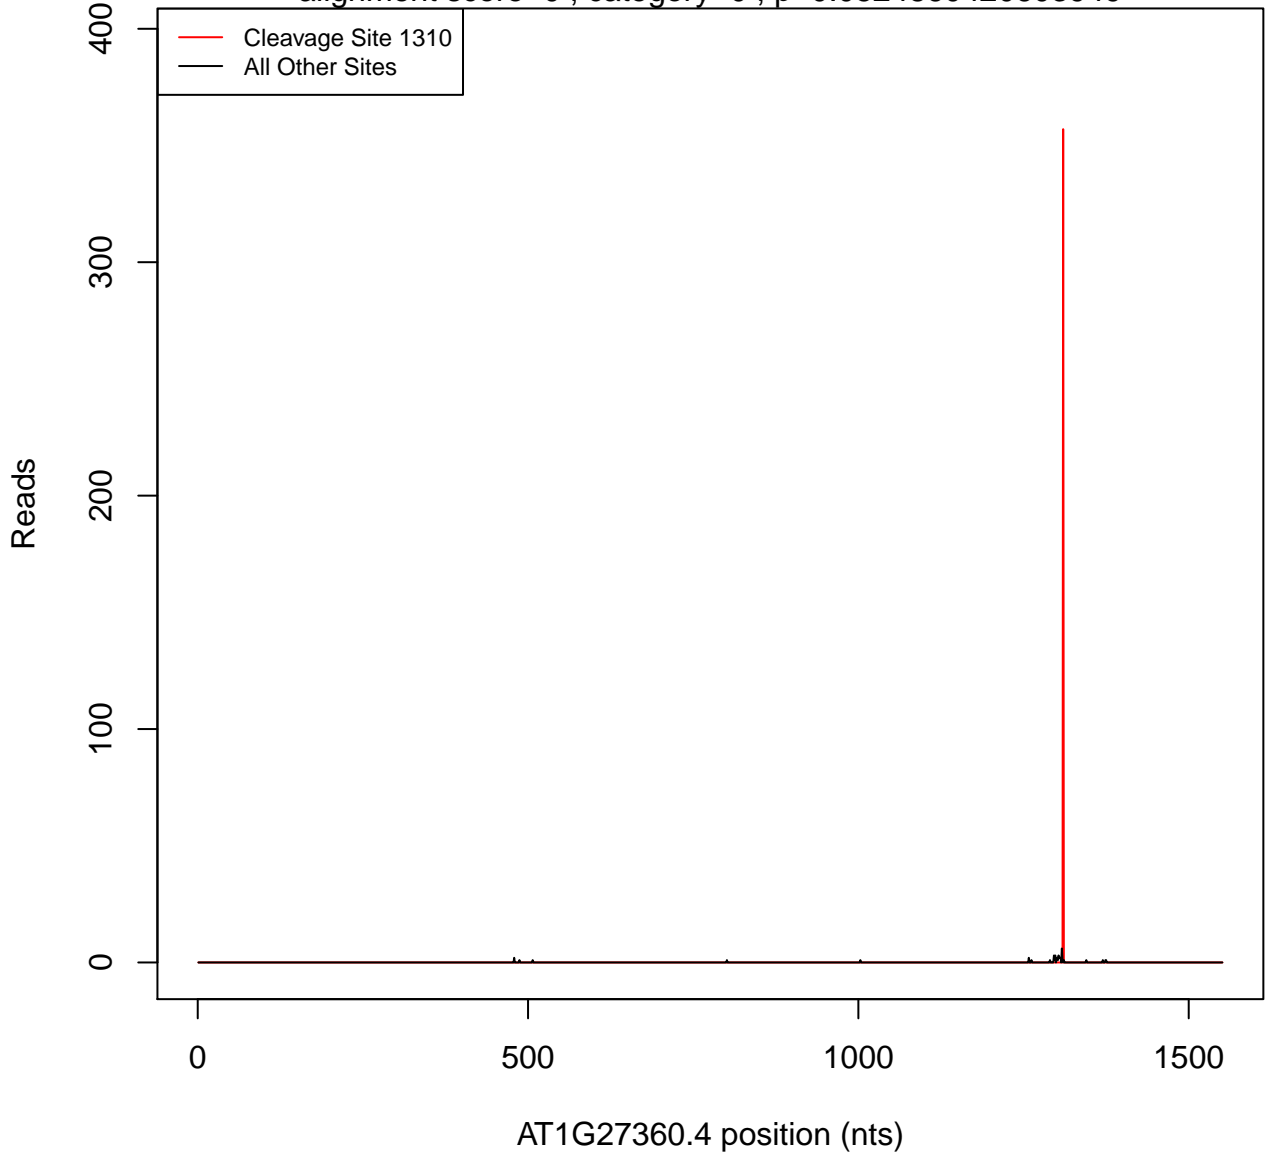

# ath-miR157d slicing AT1G27360.4 at nt 1310

alignment score=2 , category=0 , p=0.0432259504343167

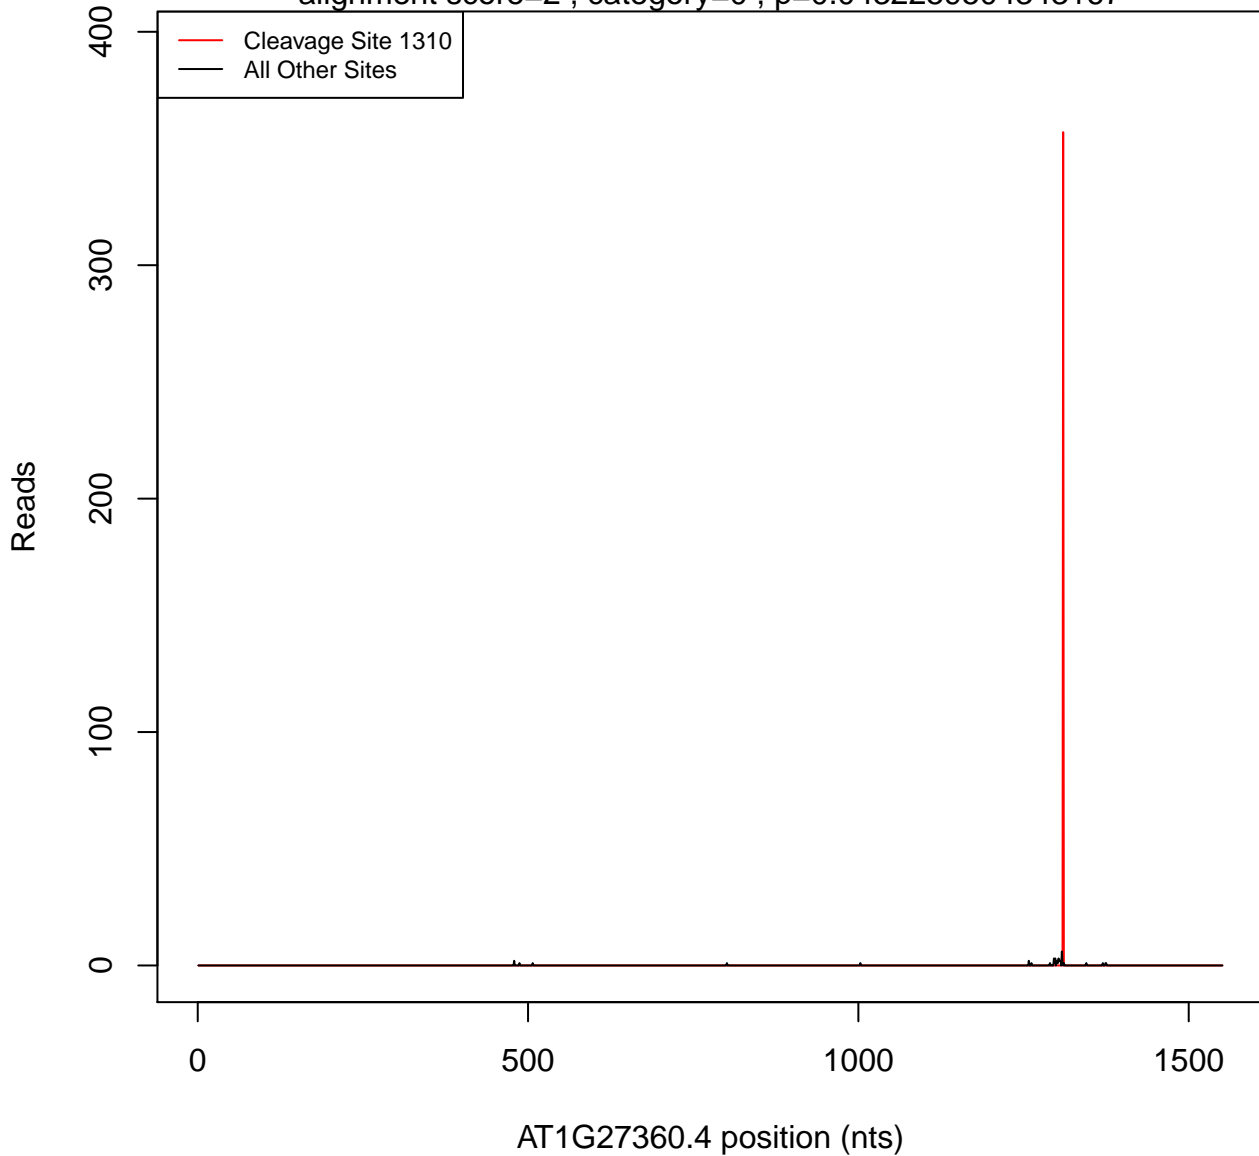



# ath-miR156a slicing AT1G27370.1 at nt 2378

alignment score=1 , category=0 , p=0.0456503157497291

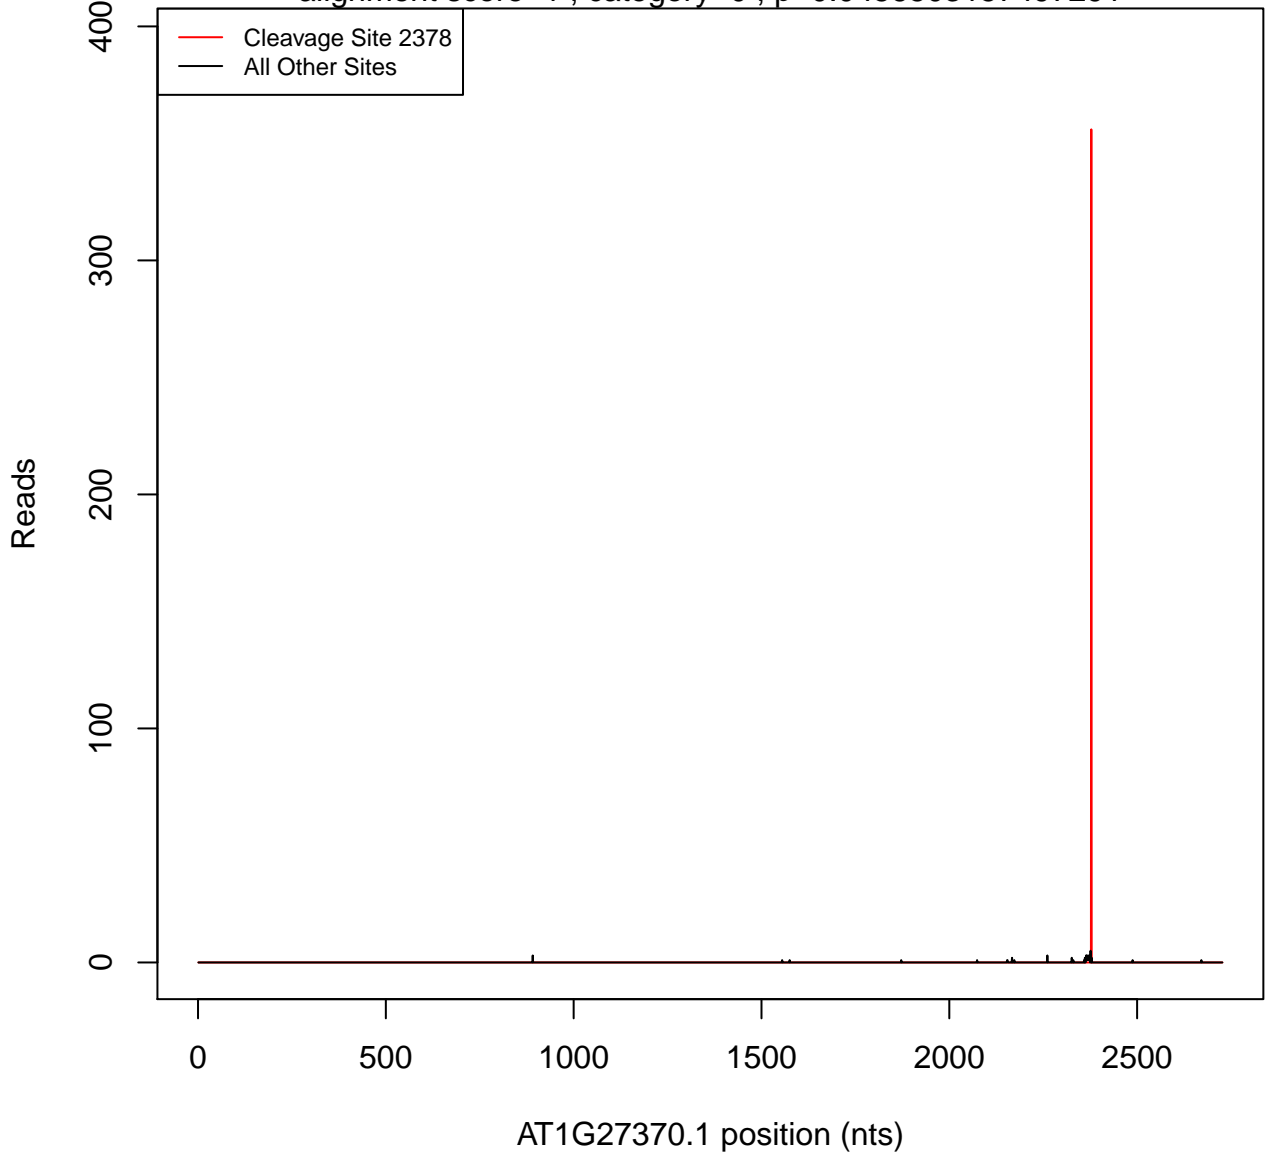

# ath-miR156b slicing AT1G27370.1 at nt 2378

alignment score=1 , category=0 , p=0.0456503157497291

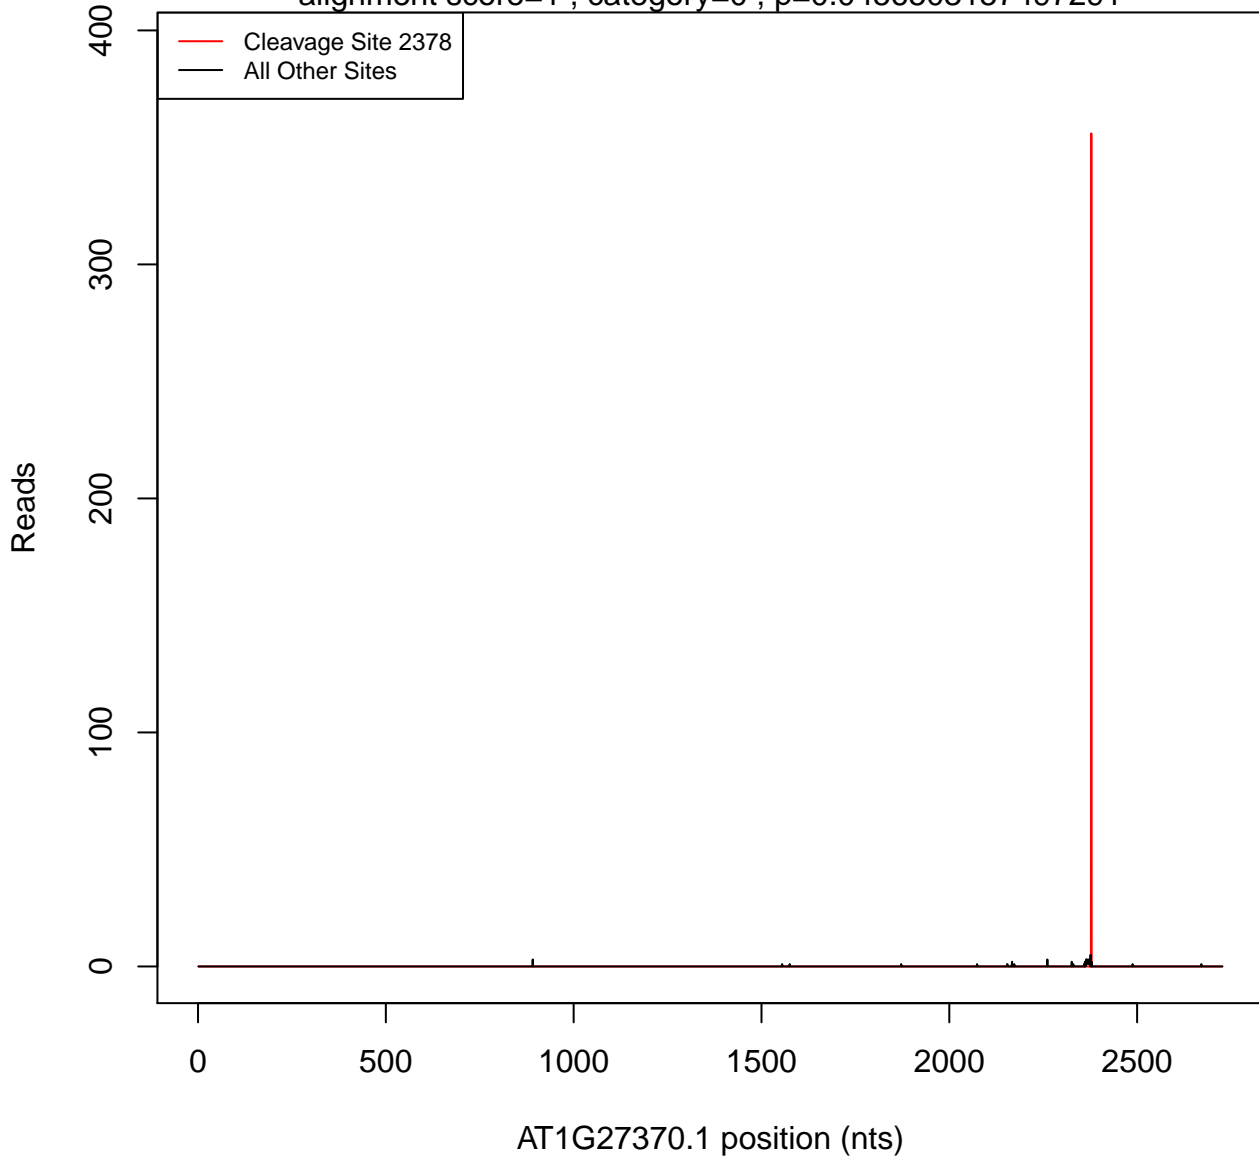

# ath-miR156c slicing AT1G27370.1 at nt 2378

alignment score=1 , category=0 , p=0.0456503157497291



# ath-miR156d slicing AT1G27370.1 at nt 2378

alignment score=1 , category=0 , p=0.0456503157497291



# ath-miR156e slicing AT1G27370.1 at nt 2378

alignment score=1 , category=0 , p=0.0456503157497291



# ath-miR156f slicing AT1G27370.1 at nt 2378

alignment score=1 , category=0 , p=0.0456503157497291



# ath-miR156g slicing AT1G27370.1 at nt 2378

alignment score=2 , category=0 , p=0.0387652739078221

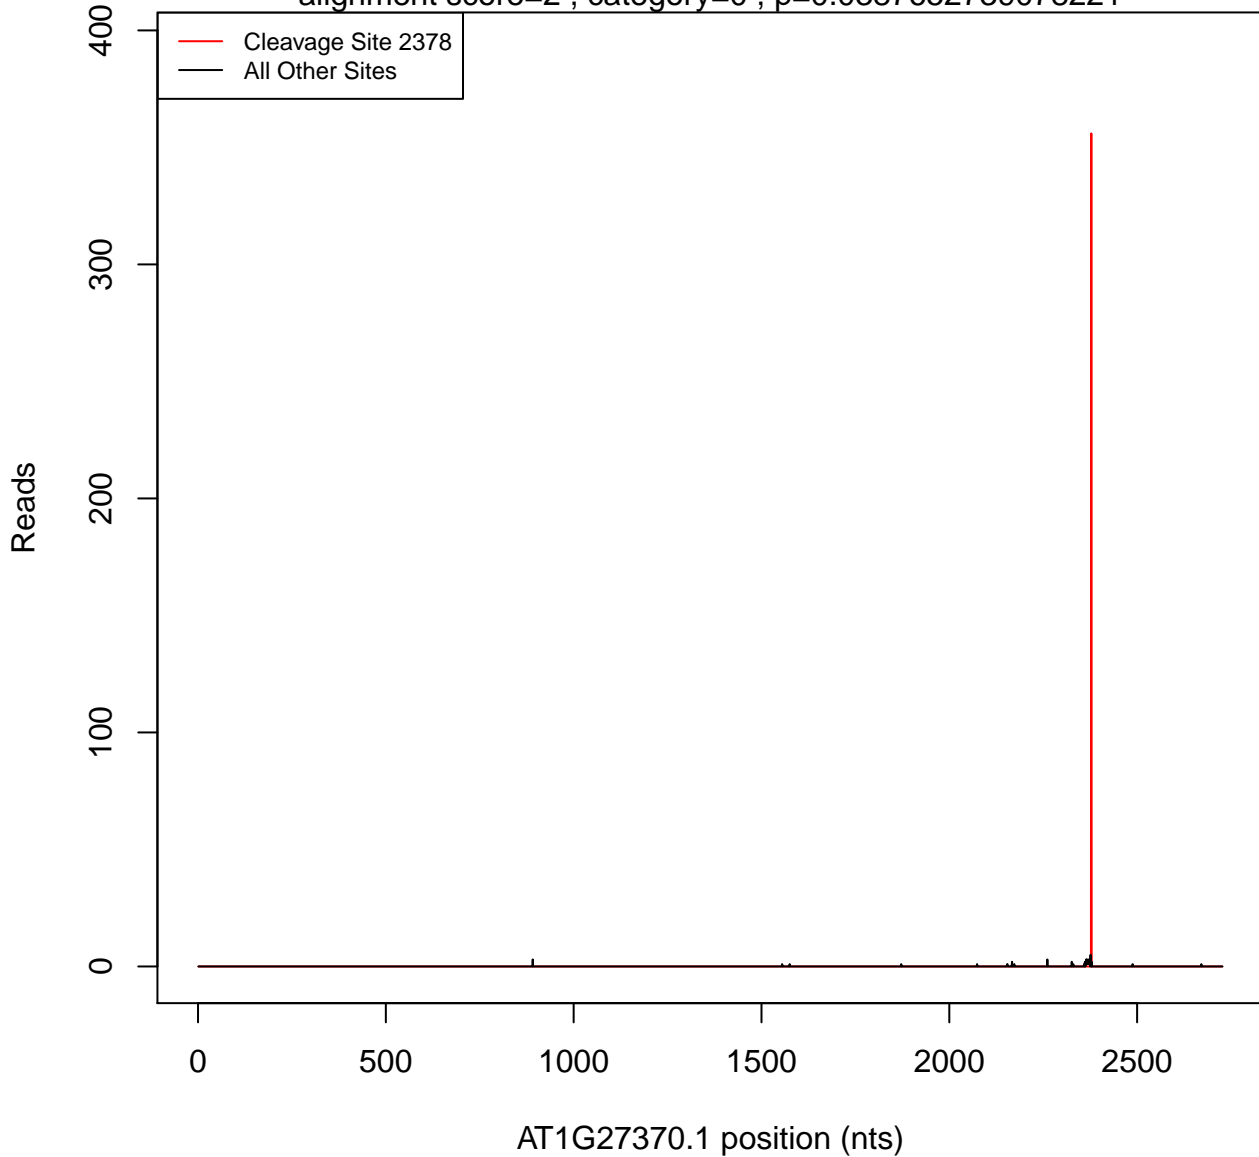

# ath-miR156h slicing AT1G27370.1 at nt 2378

alignment score=2 , category=0 , p=0.0432259504343167

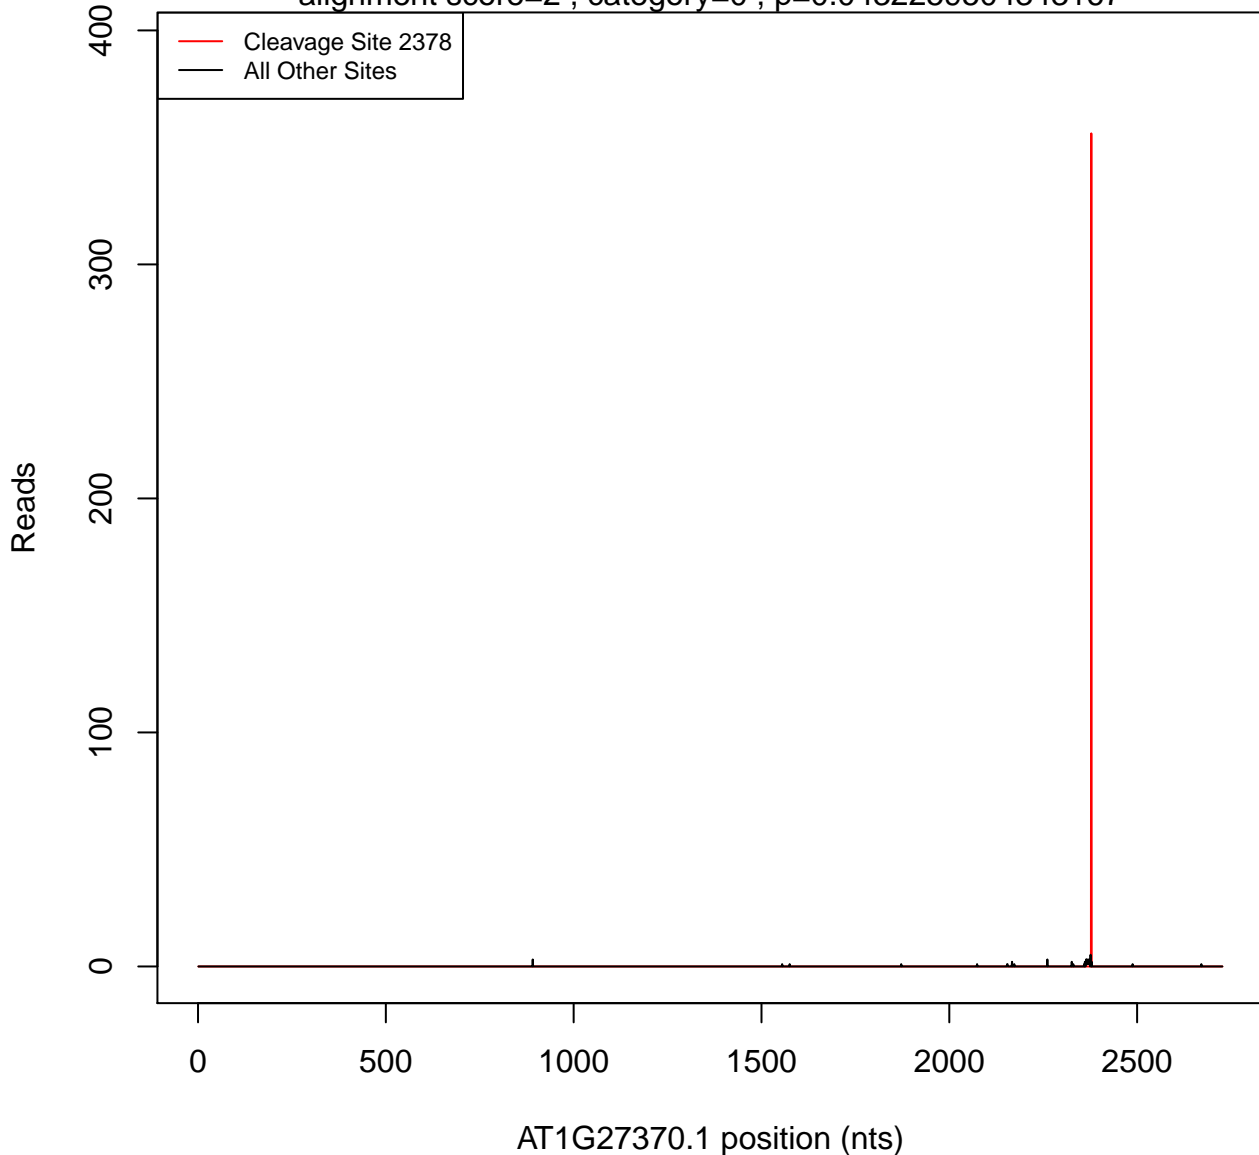



# ath-miR156i slicing AT1G27370.1 at nt 2378

alignment score=1 , category=0 , p=0.0482697796921467

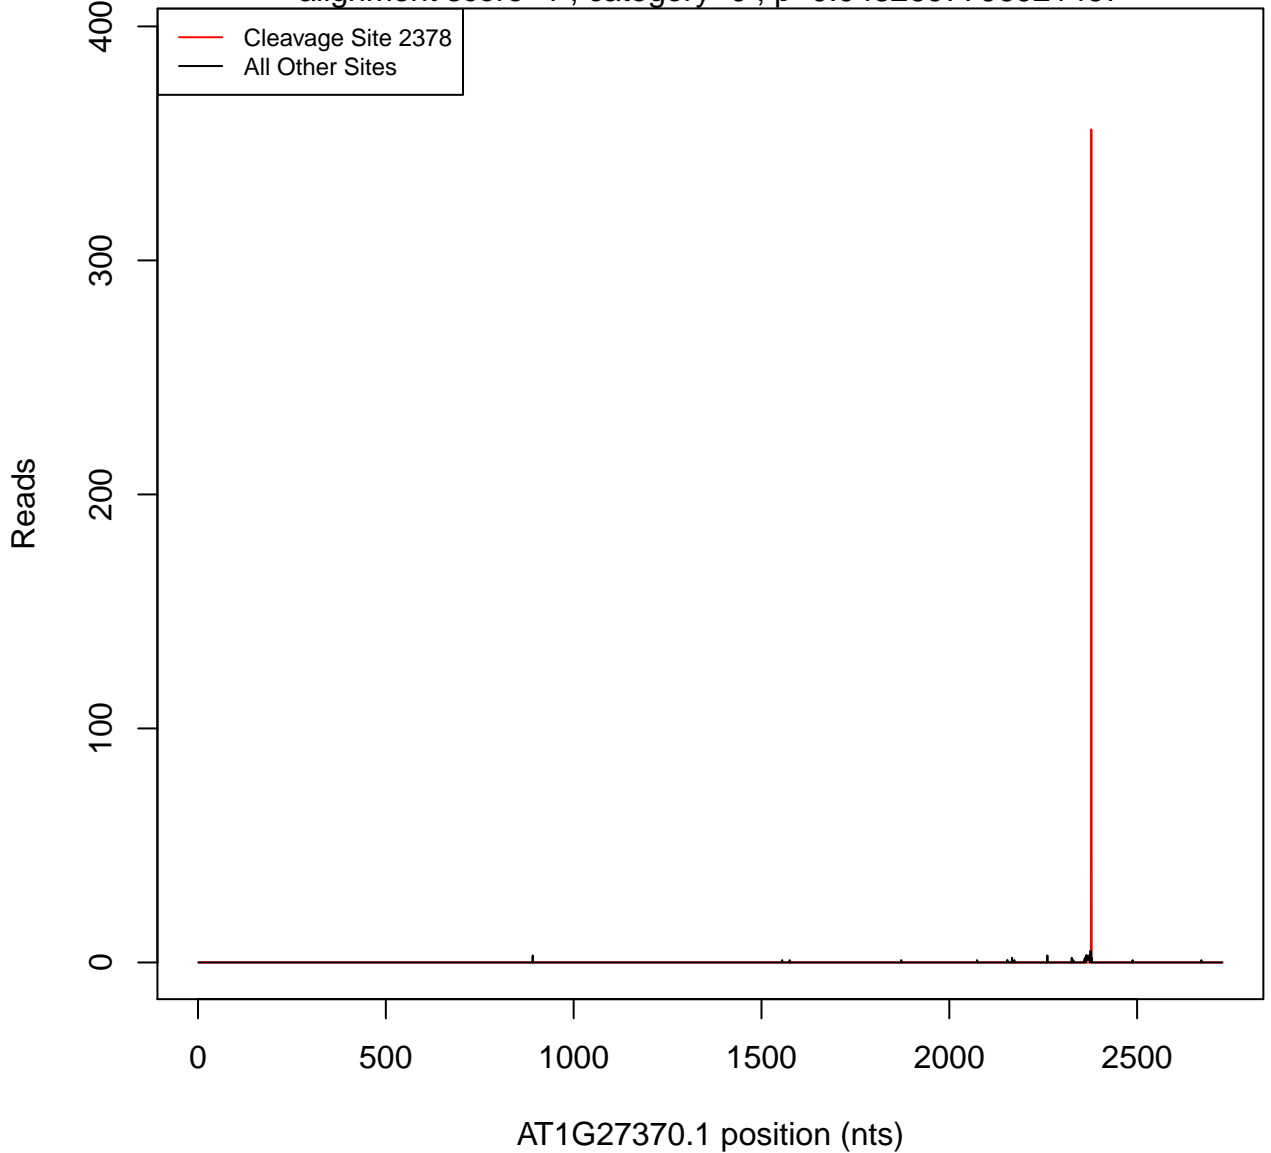

# ath-miR156j slicing AT1G27370.1 at nt 2378

alignment score=0 , category=0 , p=0.0524860420603949

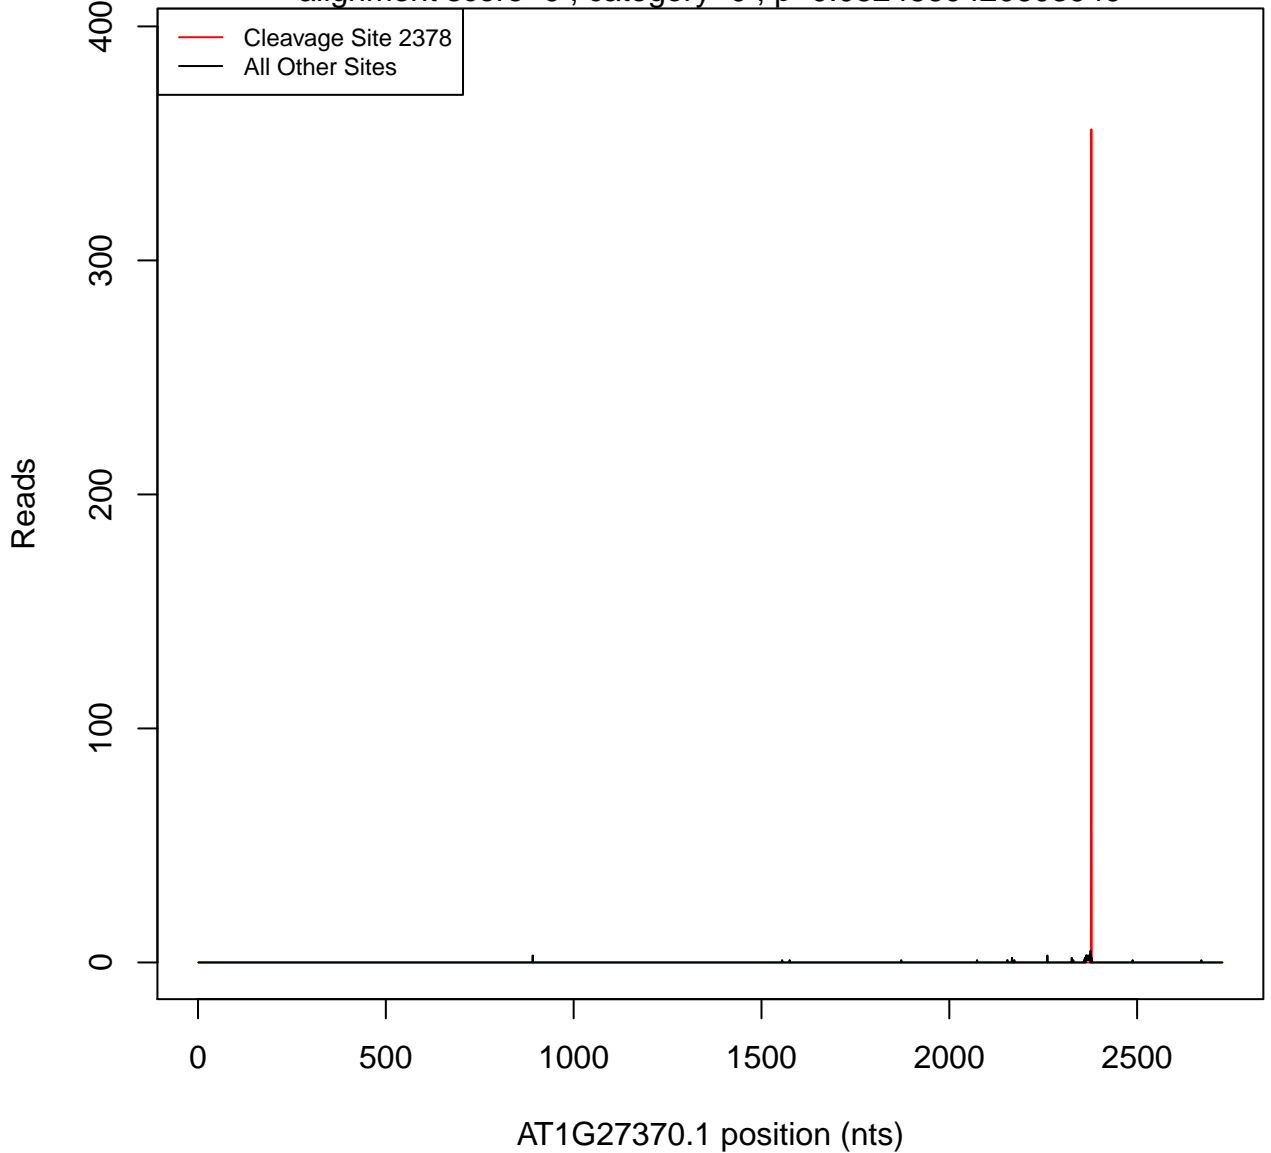

# ath-miR157d slicing AT1G27370.1 at nt 2378

alignment score=2 , category=0 , p=0.0432259504343167

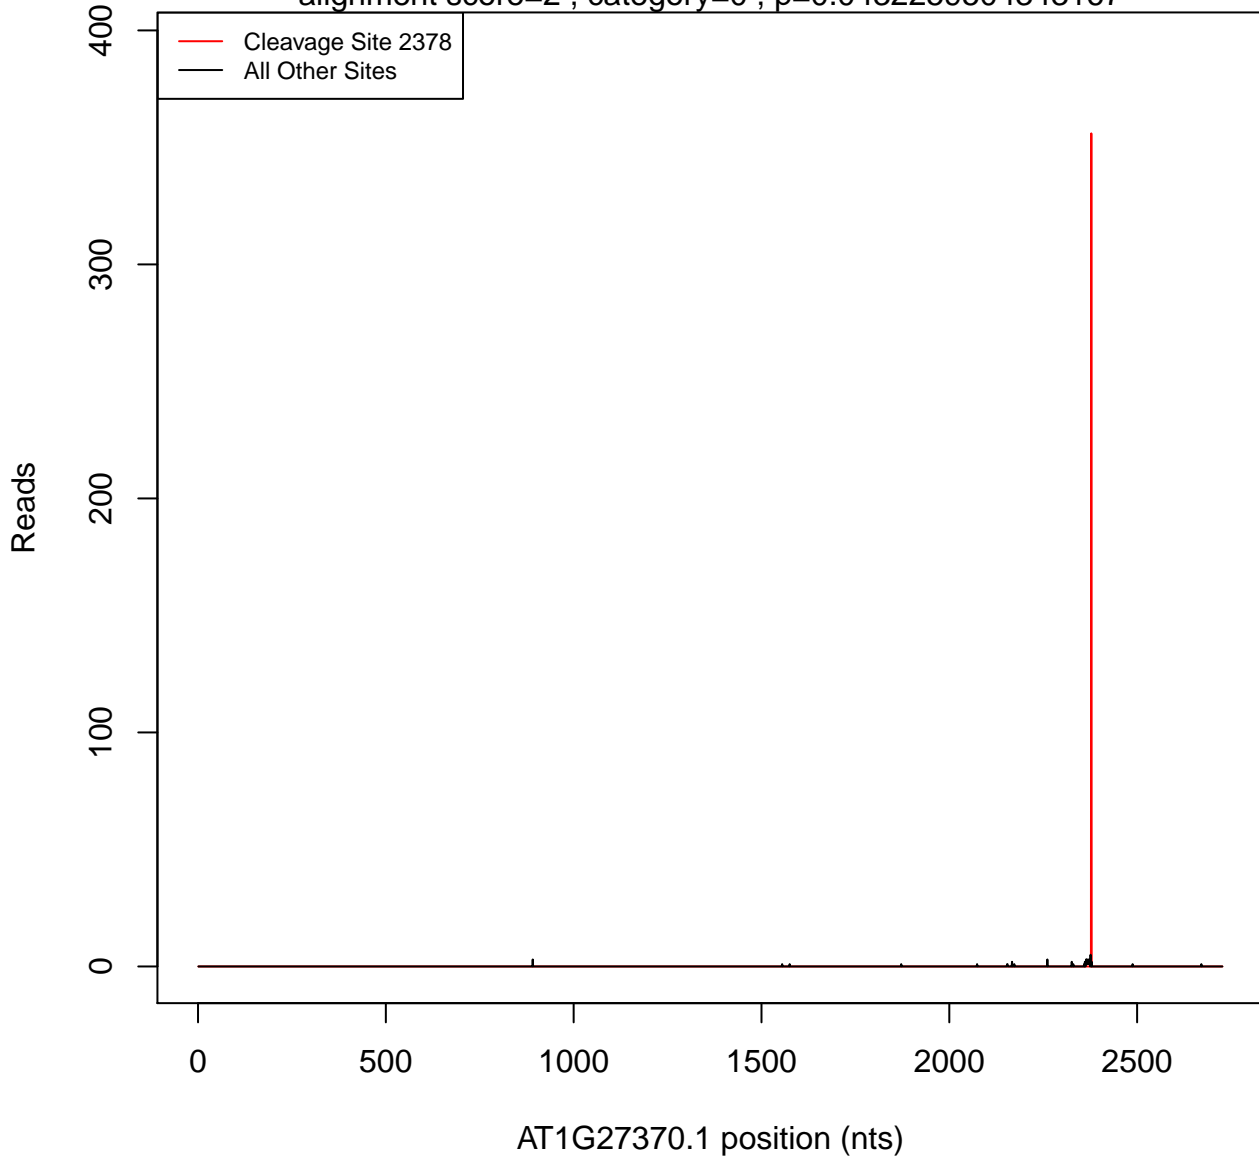

# ath-miR156a slicing AT1G27370.2 at nt 1456

alignment score=1 , category=0 , p=0.0456503157497291

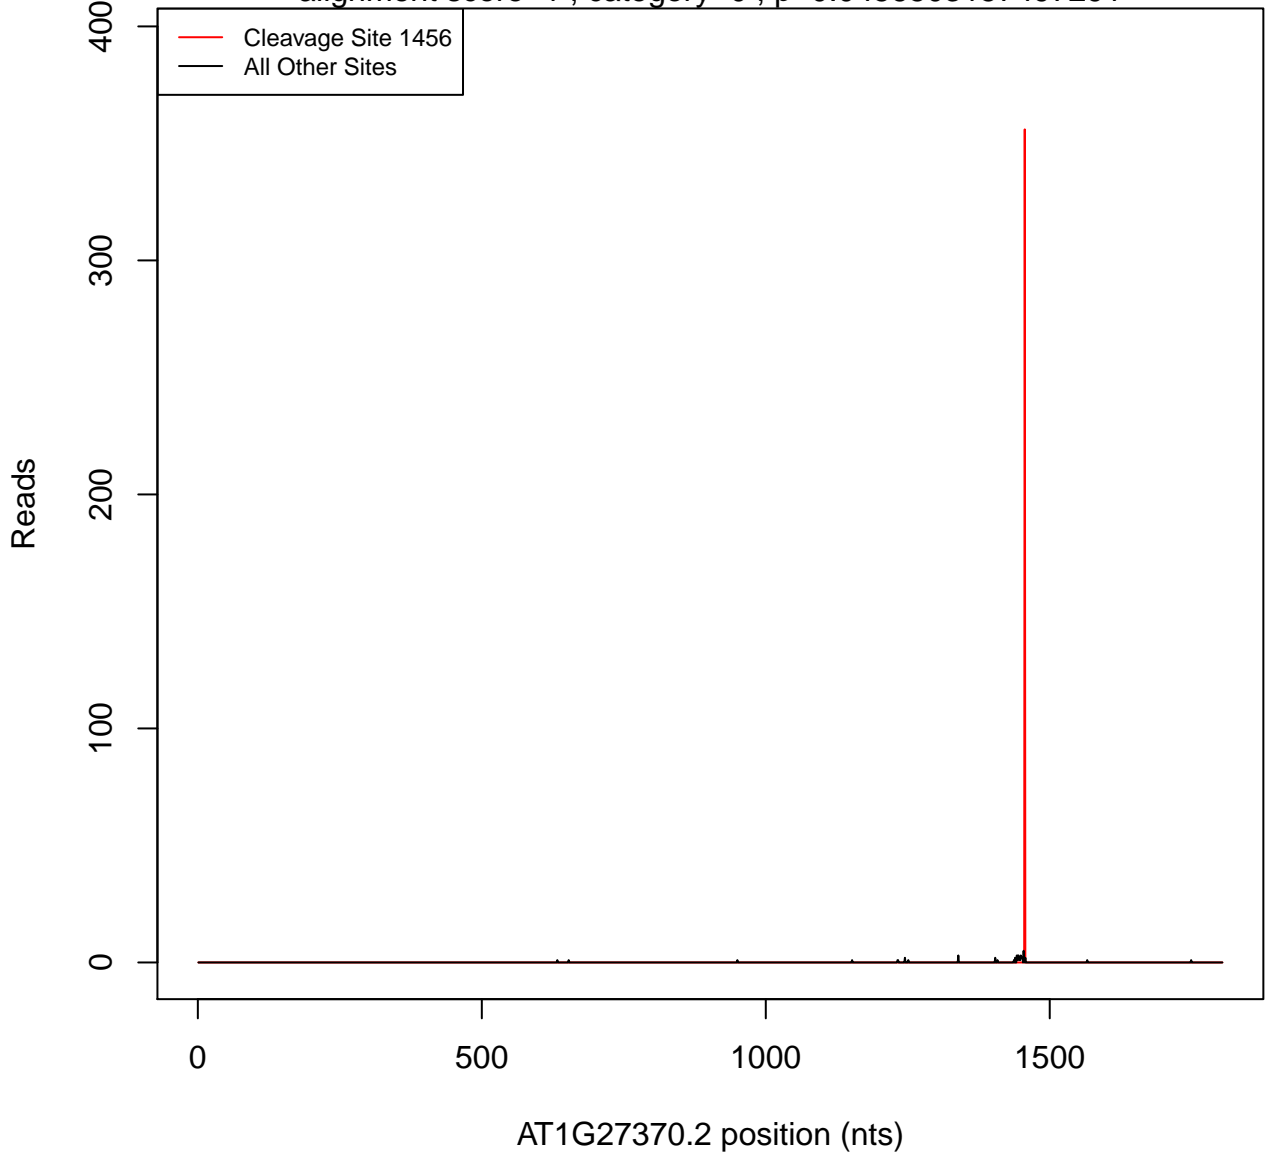

# ath-miR156b slicing AT1G27370.2 at nt 1456

alignment score=1 , category=0 , p=0.0456503157497291

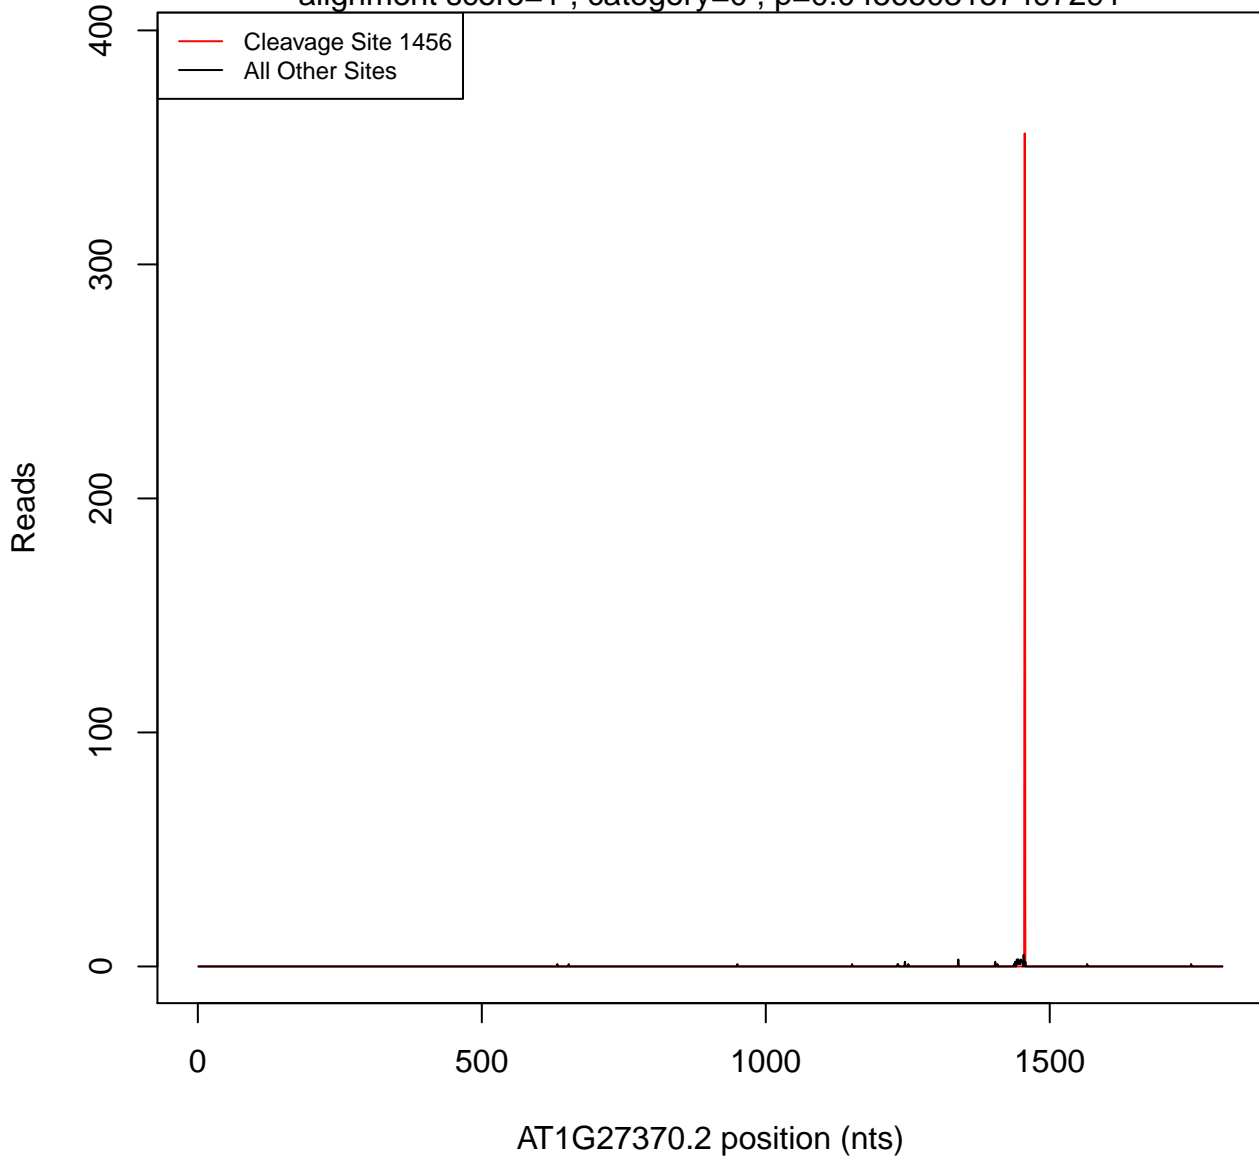

# ath-miR156c slicing AT1G27370.2 at nt 1456

alignment score=1 , category=0 , p=0.0456503157497291

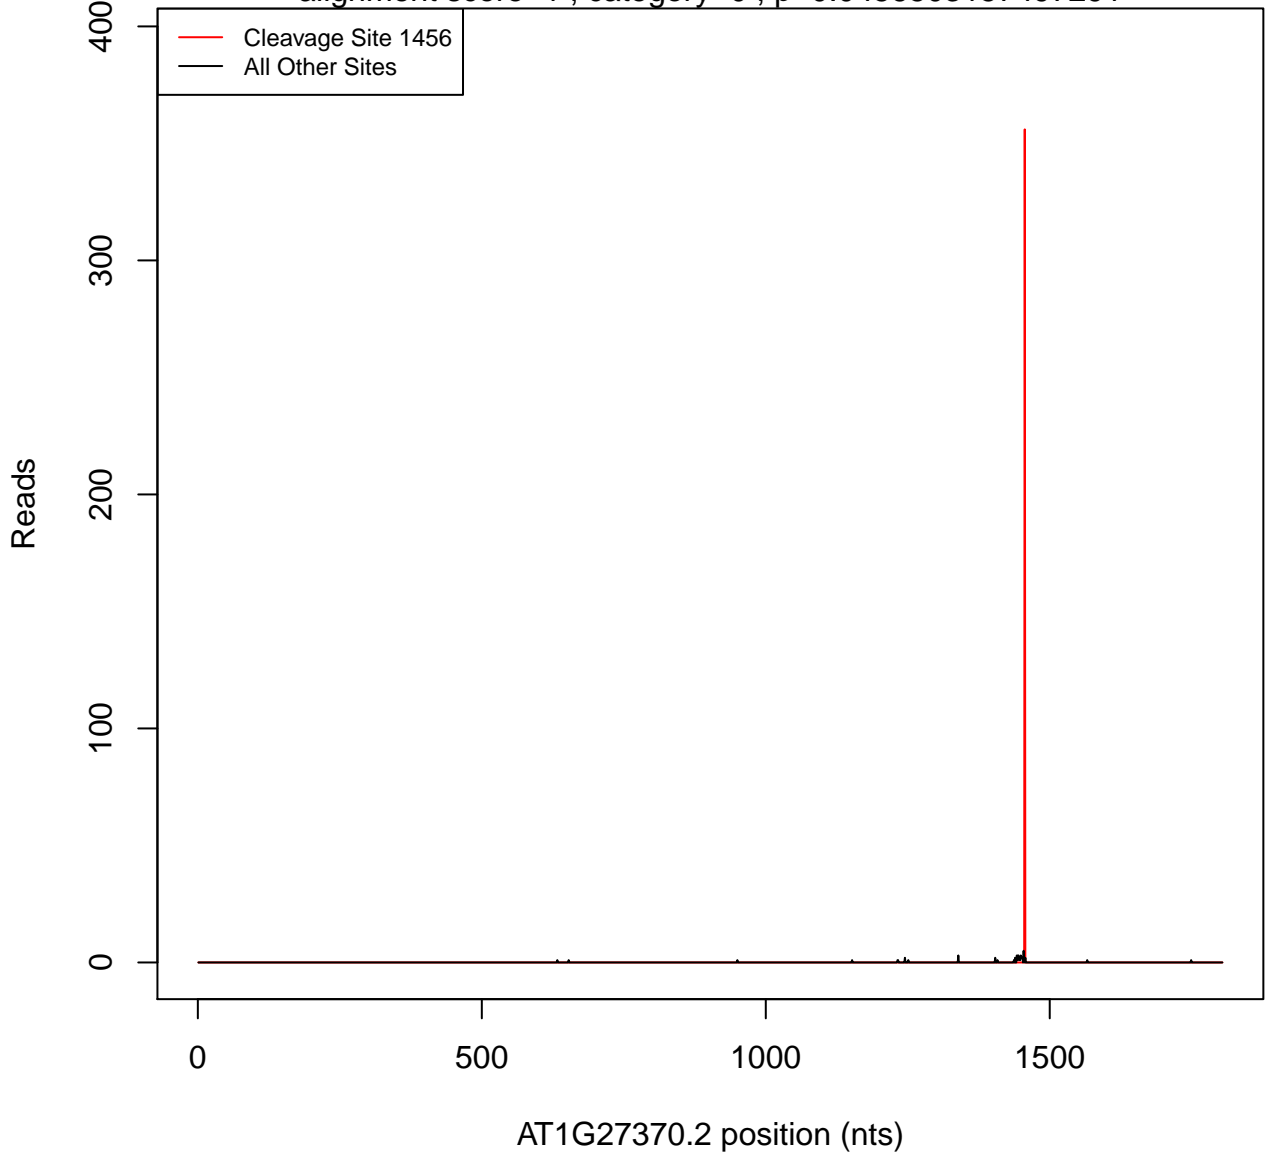

# ath-miR156d slicing AT1G27370.2 at nt 1456

alignment score=1 , category=0 , p=0.0456503157497291



# ath-miR156e slicing AT1G27370.2 at nt 1456

alignment score=1 , category=0 , p=0.0456503157497291





# ath-miR156f slicing AT1G27370.2 at nt 1456

alignment score=1 , category=0 , p=0.0456503157497291



# ath-miR156g slicing AT1G27370.2 at nt 1456

alignment score=2 , category=0 , p=0.0387652739078221

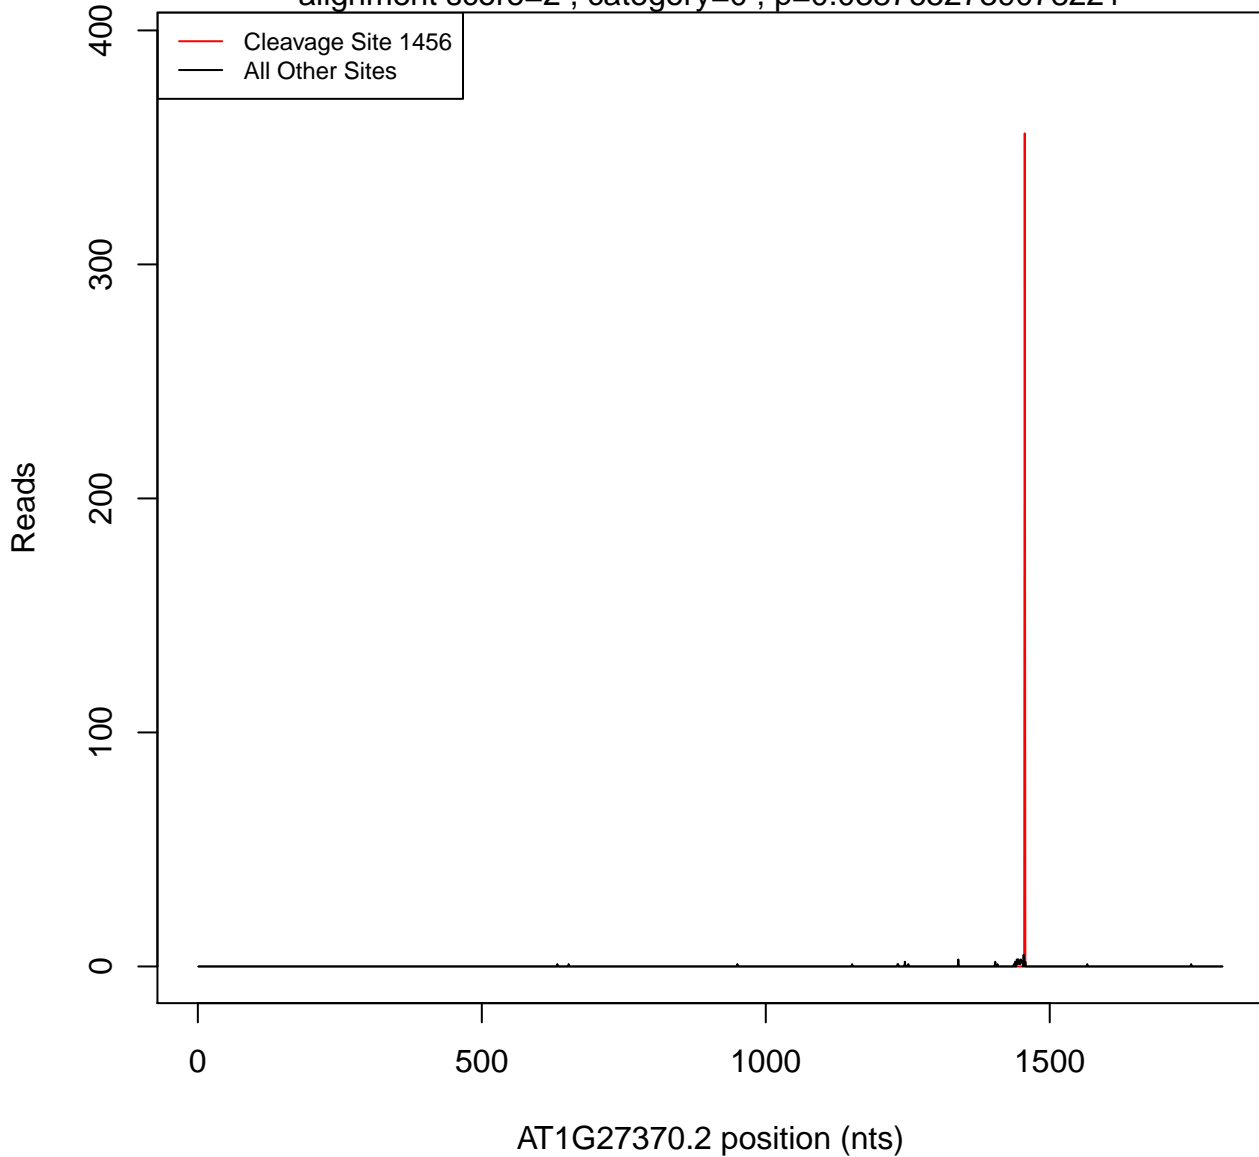

# ath-miR156h slicing AT1G27370.2 at nt 1456

alignment score=2 , category=0 , p=0.0432259504343167

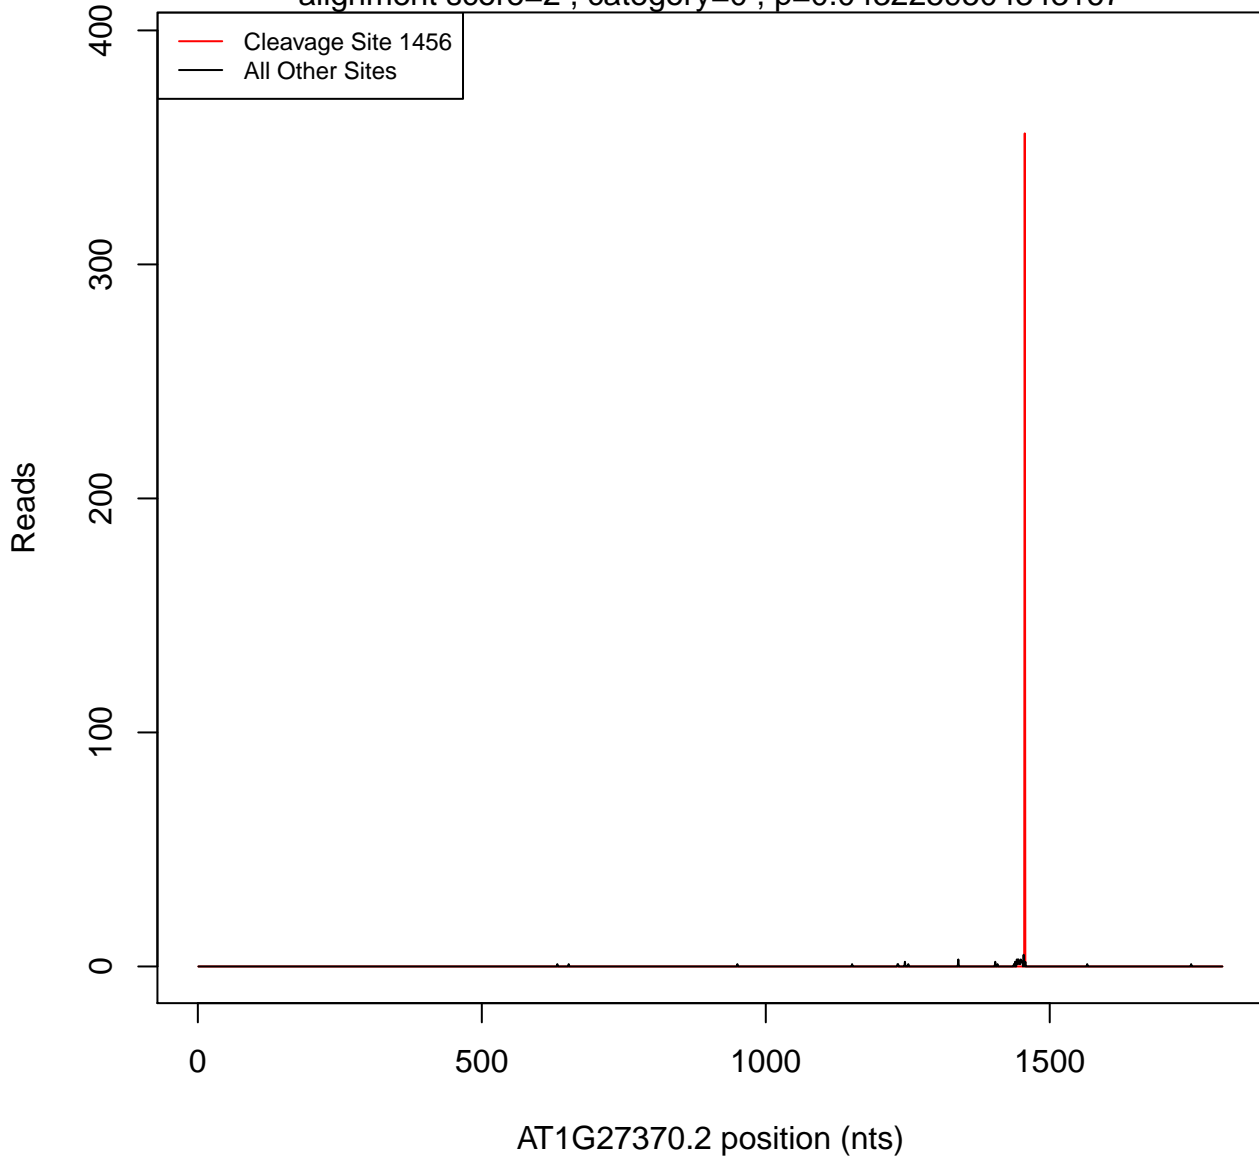

# ath-miR156i slicing AT1G27370.2 at nt 1456

alignment score=1 , category=0 , p=0.0482697796921467

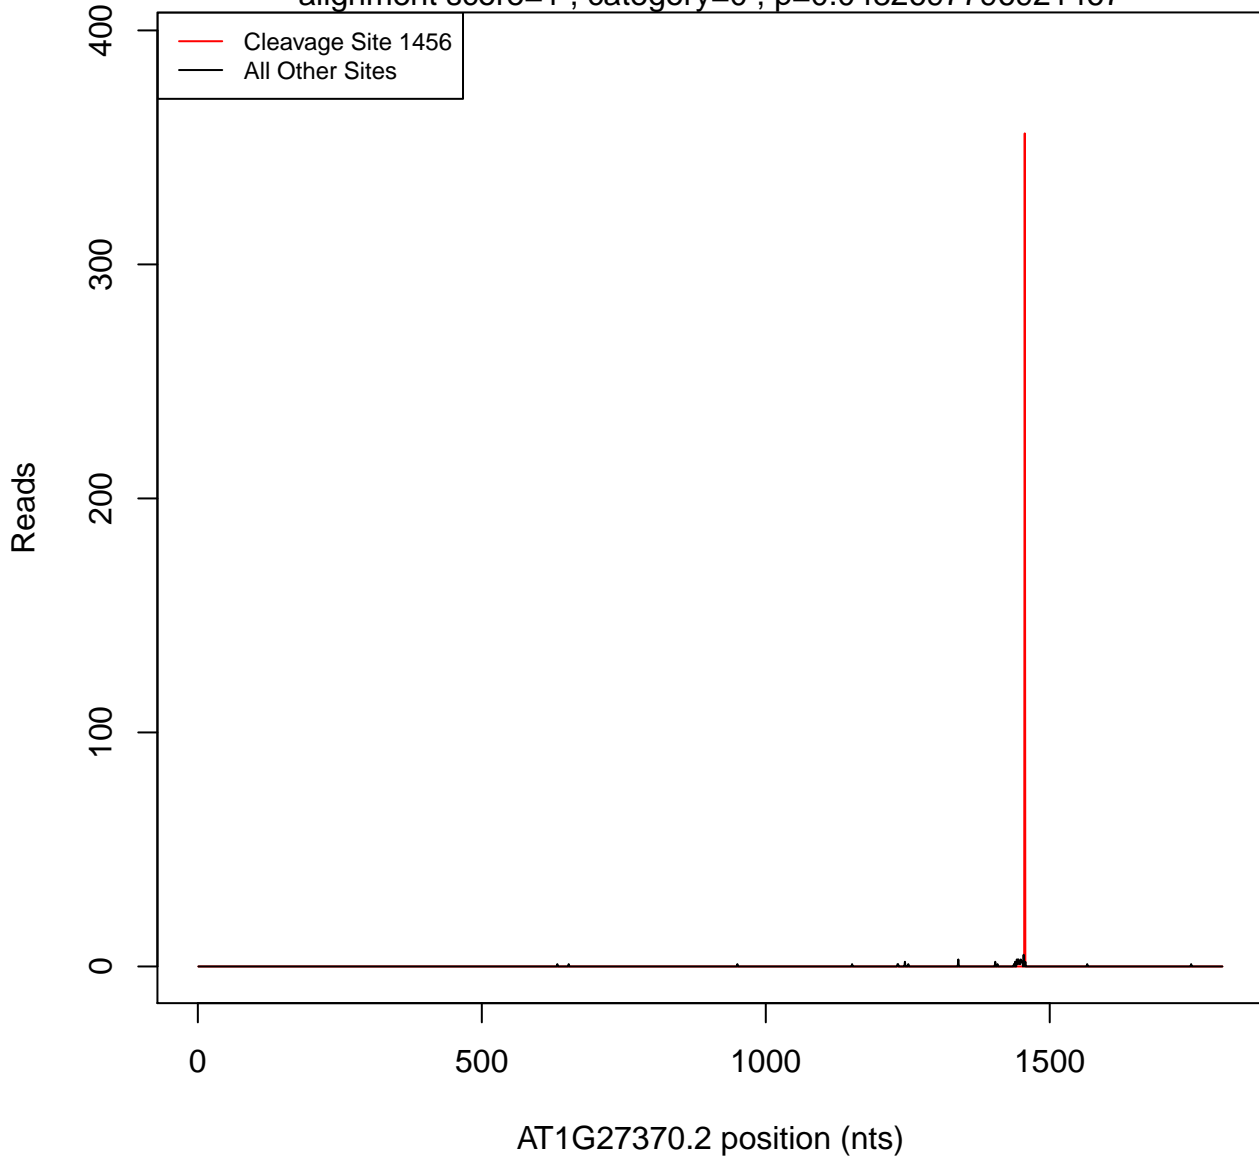

# ath-miR156j slicing AT1G27370.2 at nt 1456

alignment score=0 , category=0 , p=0.0524860420603949

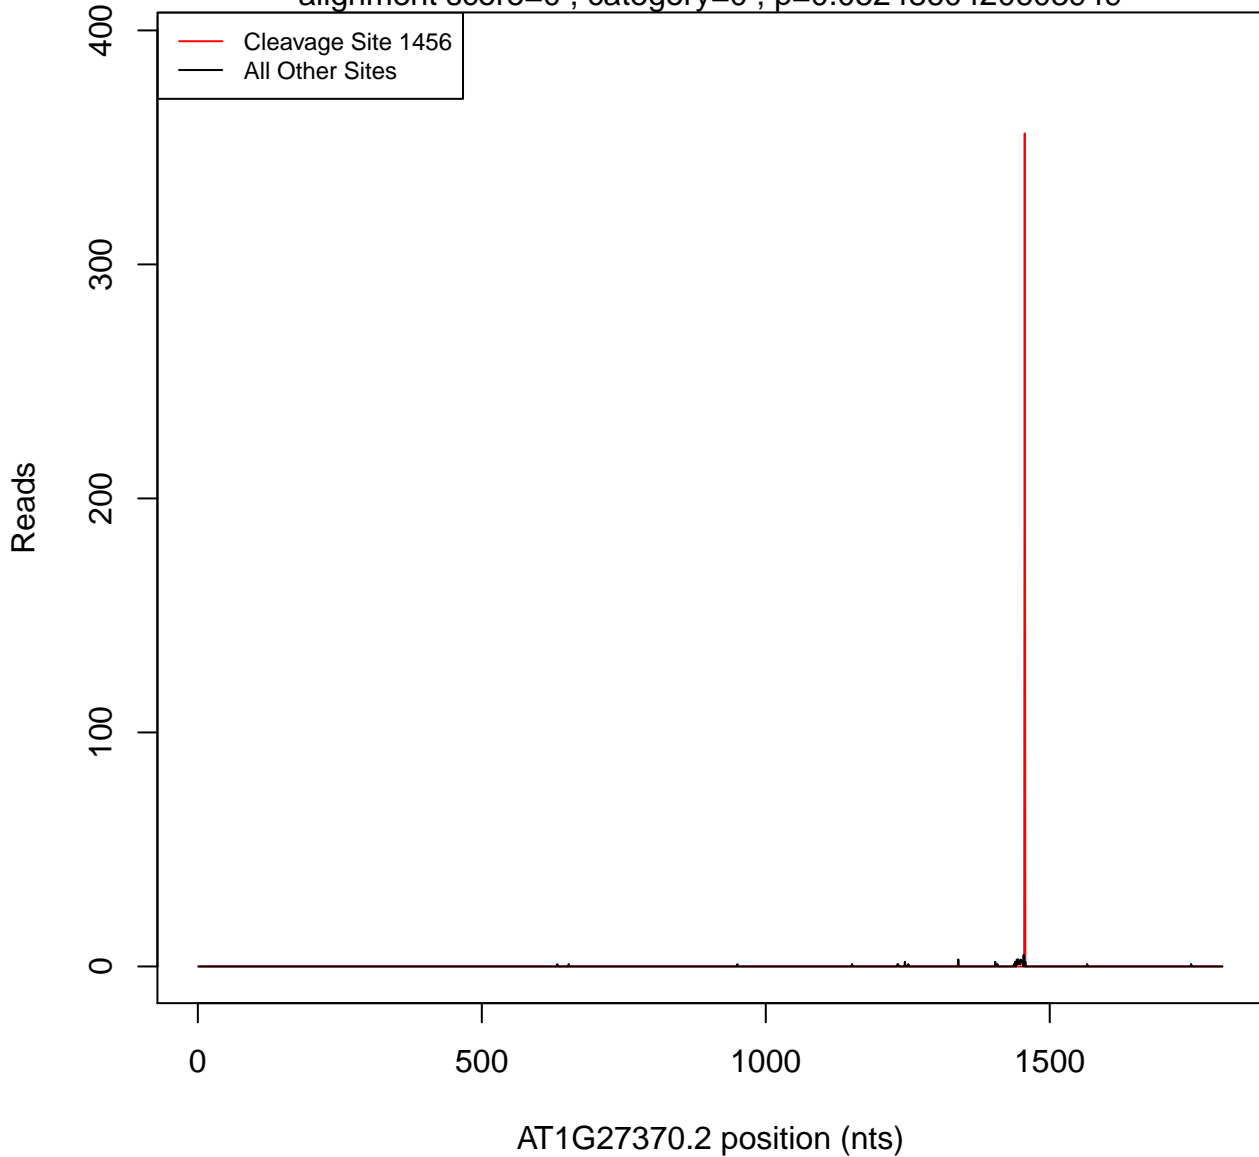

# ath-miR157d slicing AT1G27370.2 at nt 1456

alignment score=2 , category=0 , p=0.0432259504343167



# ath-miR156a slicing AT1G27370.3 at nt 1238

alignment score=1 , category=0 , p=0.0456503157497291

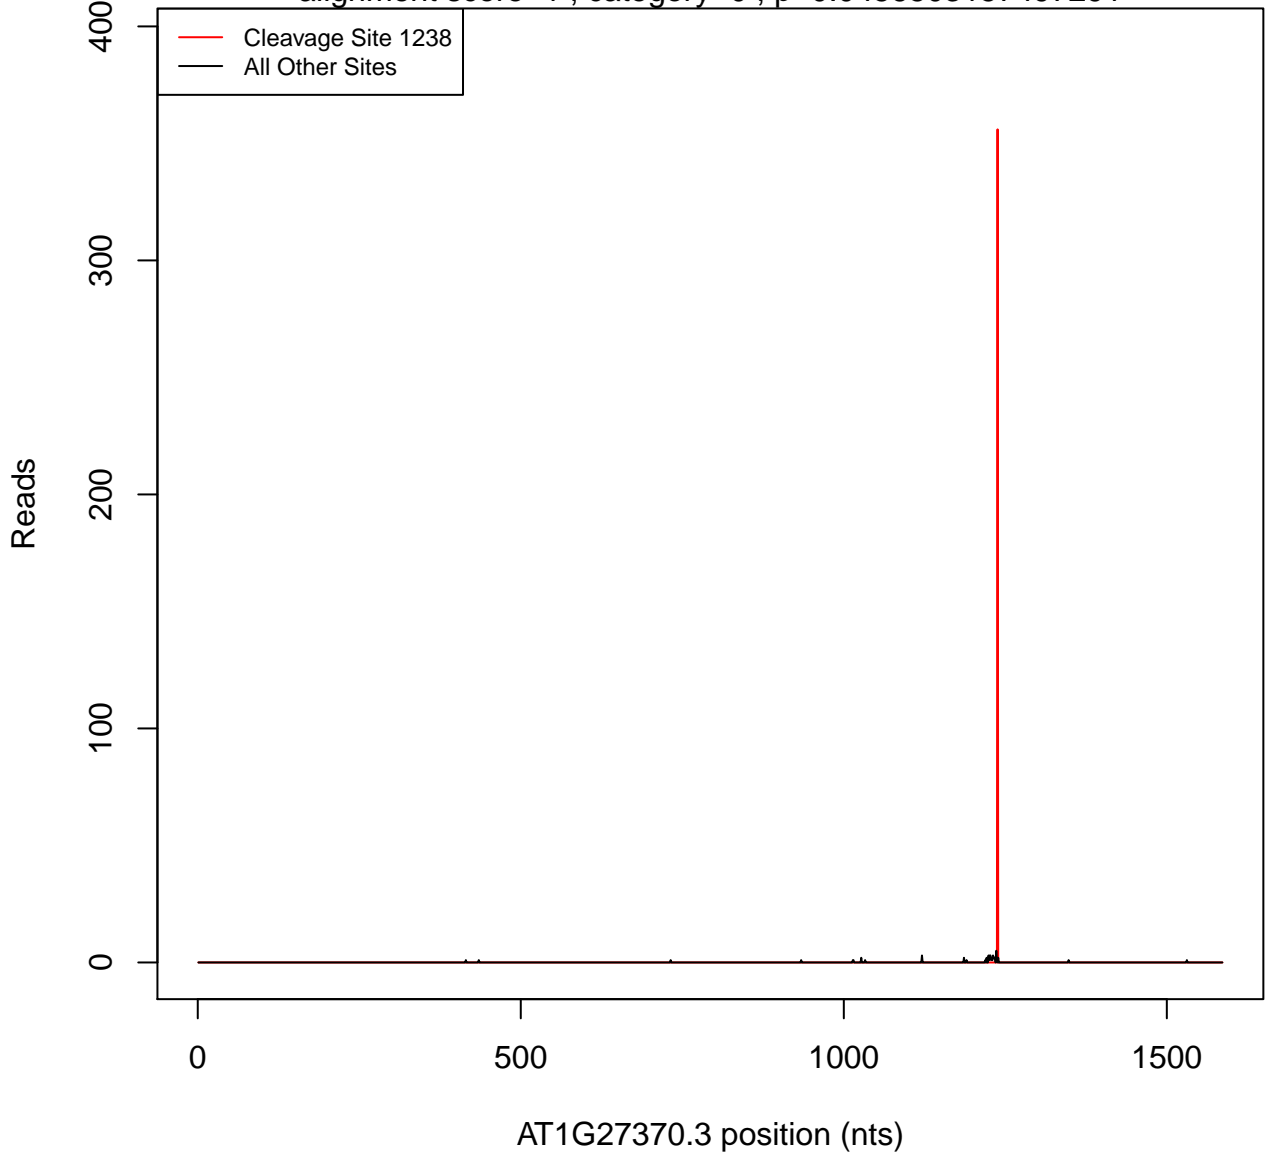

# ath-miR156b slicing AT1G27370.3 at nt 1238

alignment score=1 , category=0 , p=0.0456503157497291

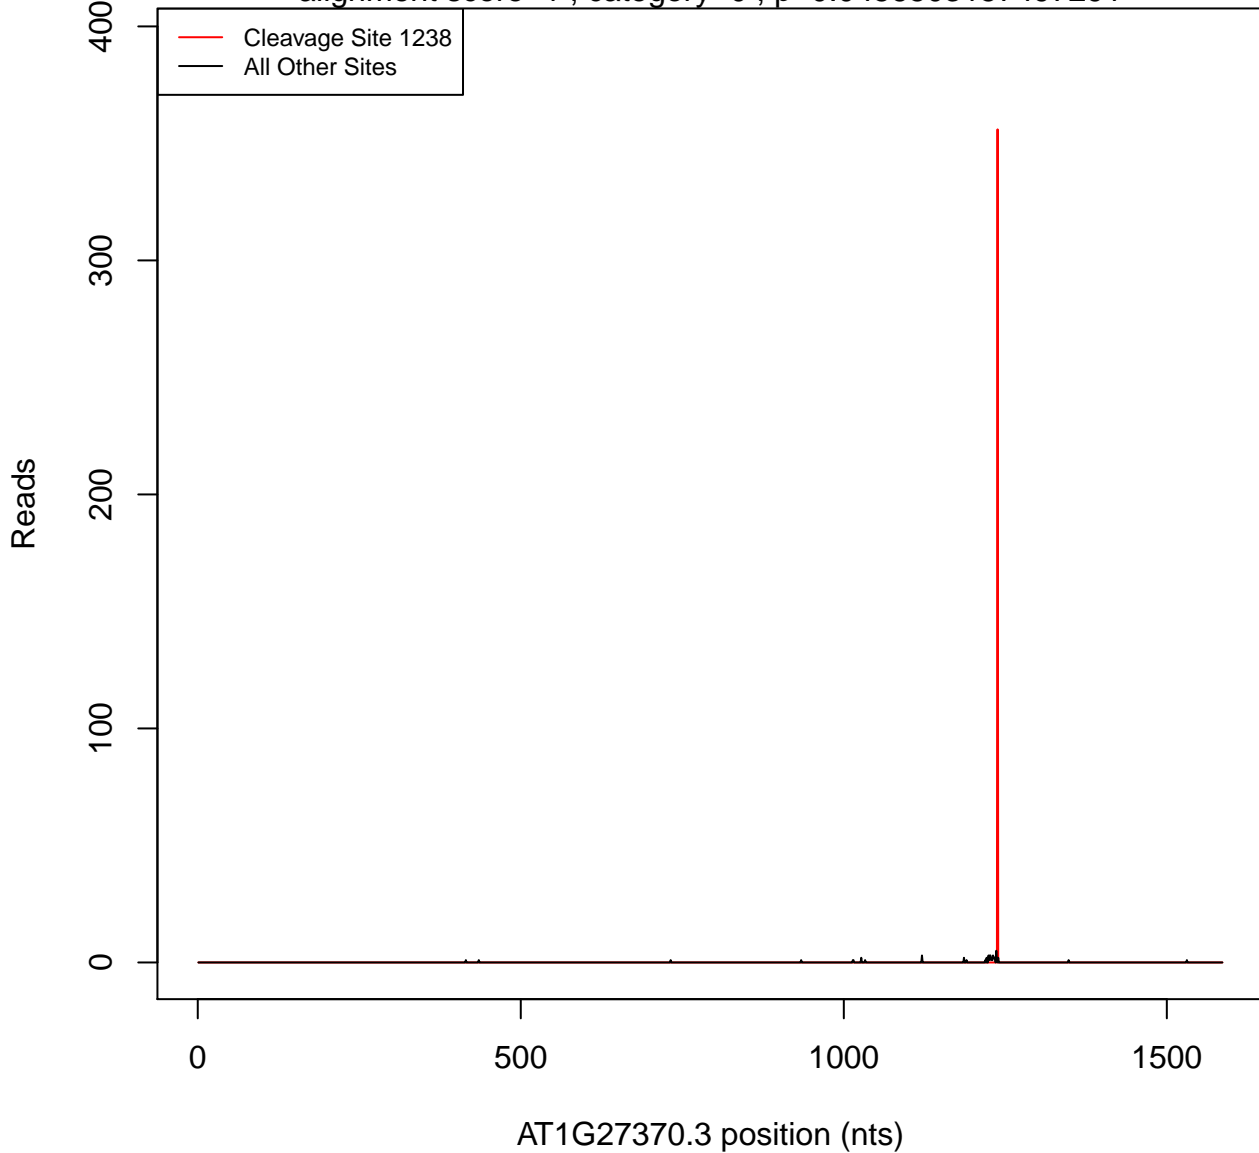



# ath-miR156c slicing AT1G27370.3 at nt 1238

alignment score=1 , category=0 , p=0.0456503157497291

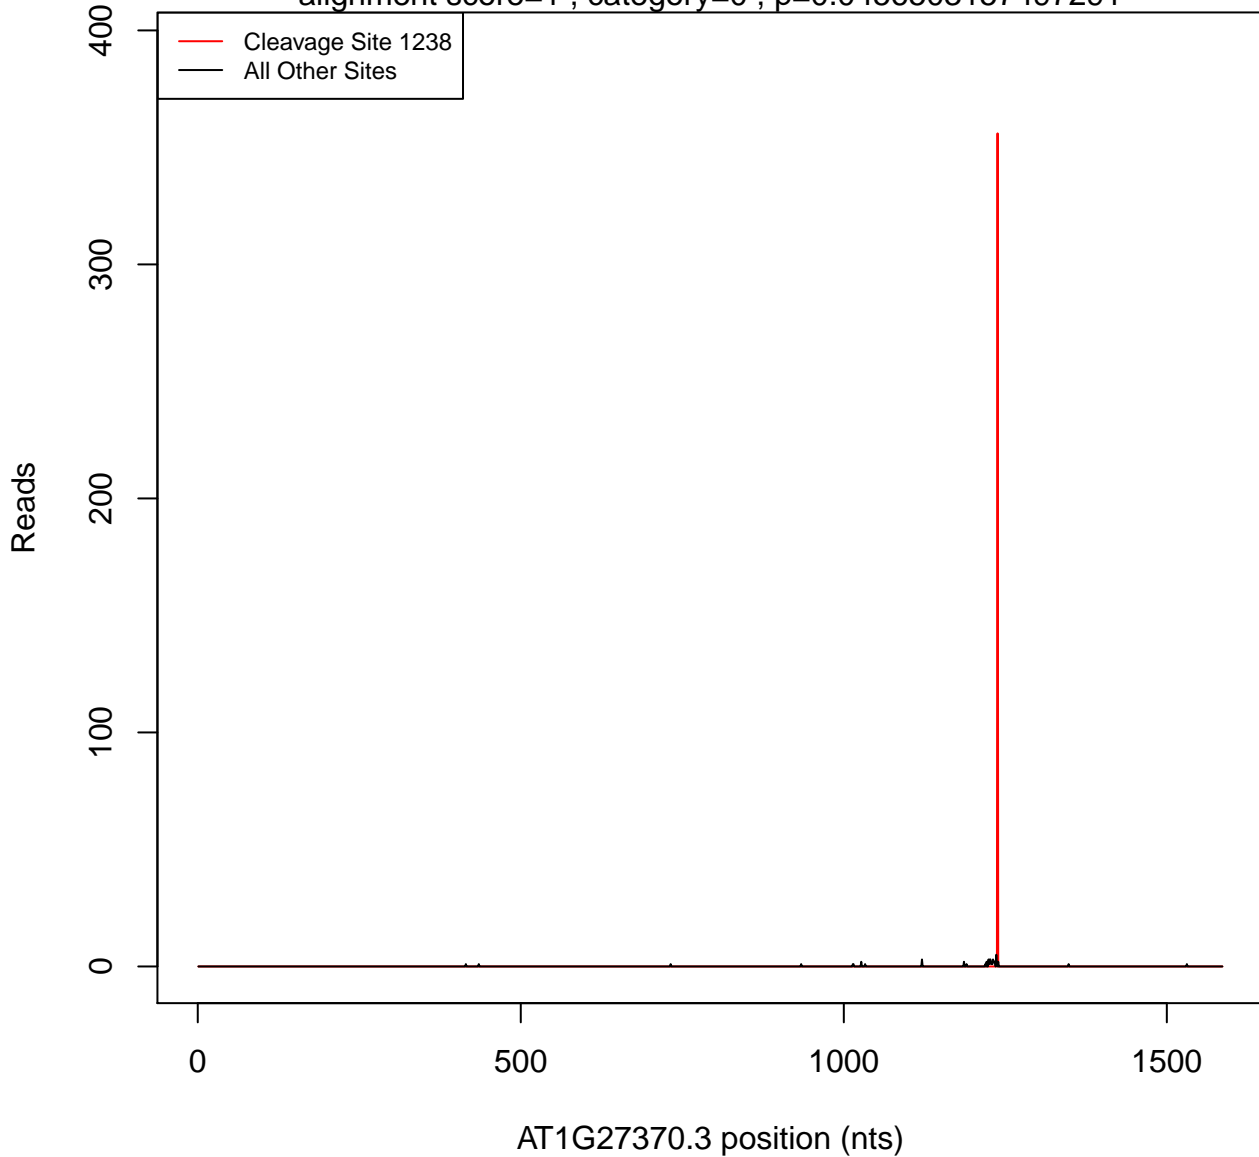

# ath-miR156d slicing AT1G27370.3 at nt 1238

alignment score=1 , category=0 , p=0.0456503157497291

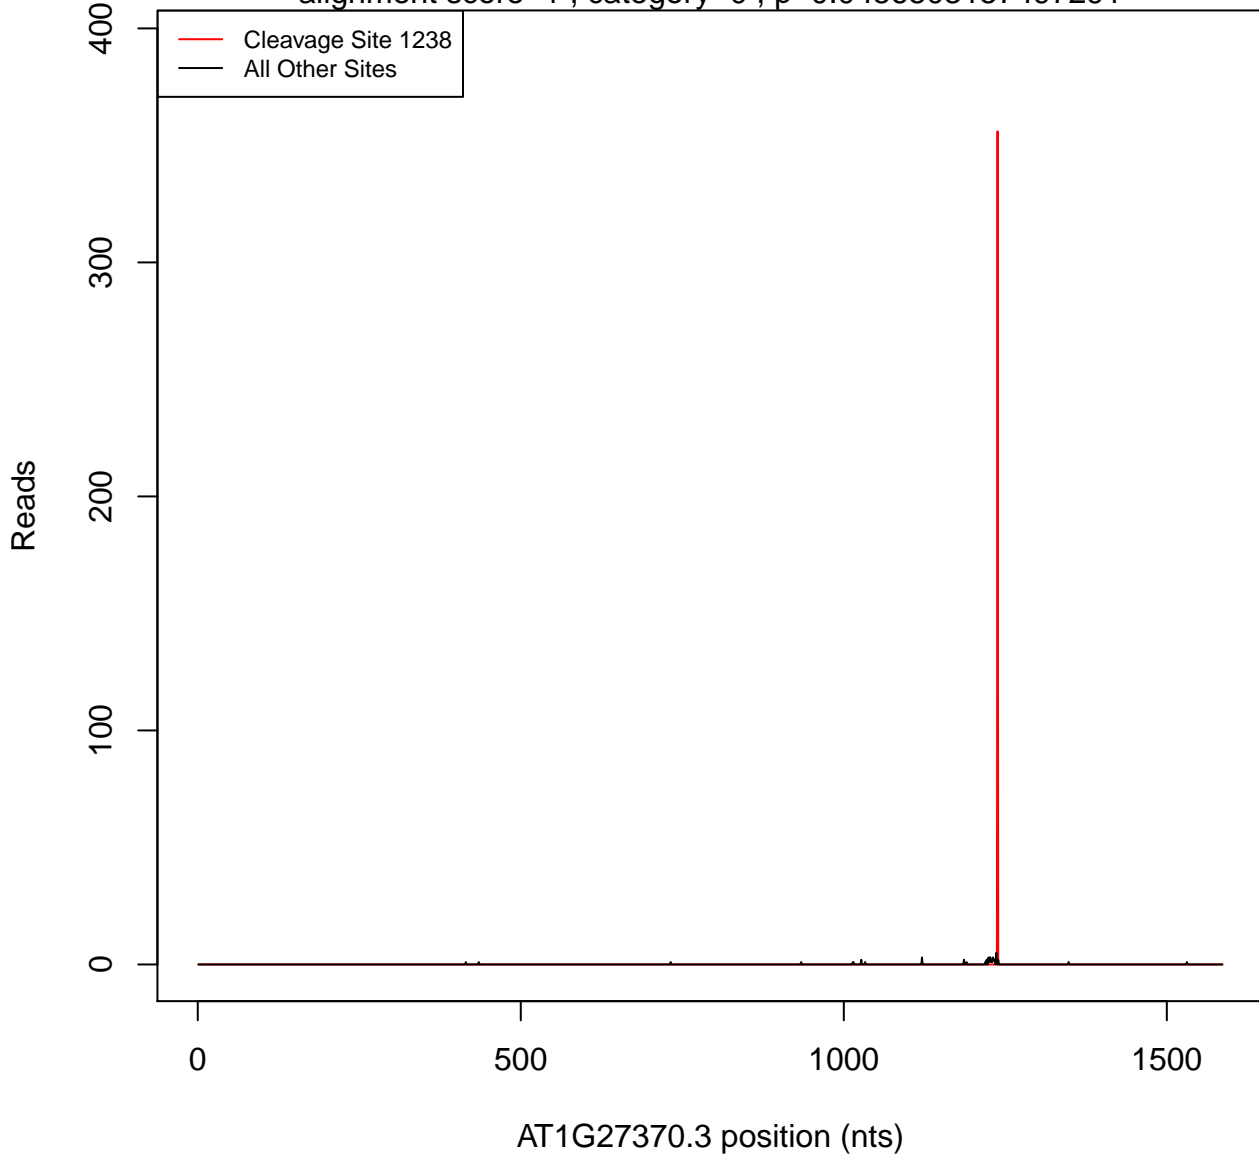

# ath-miR156e slicing AT1G27370.3 at nt 1238

alignment score=1 , category=0 , p=0.0456503157497291



# ath-miR156f slicing AT1G27370.3 at nt 1238

alignment score=1 , category=0 , p=0.0456503157497291



# ath-miR156g slicing AT1G27370.3 at nt 1238

alignment score=2 , category=0 , p=0.0387652739078221

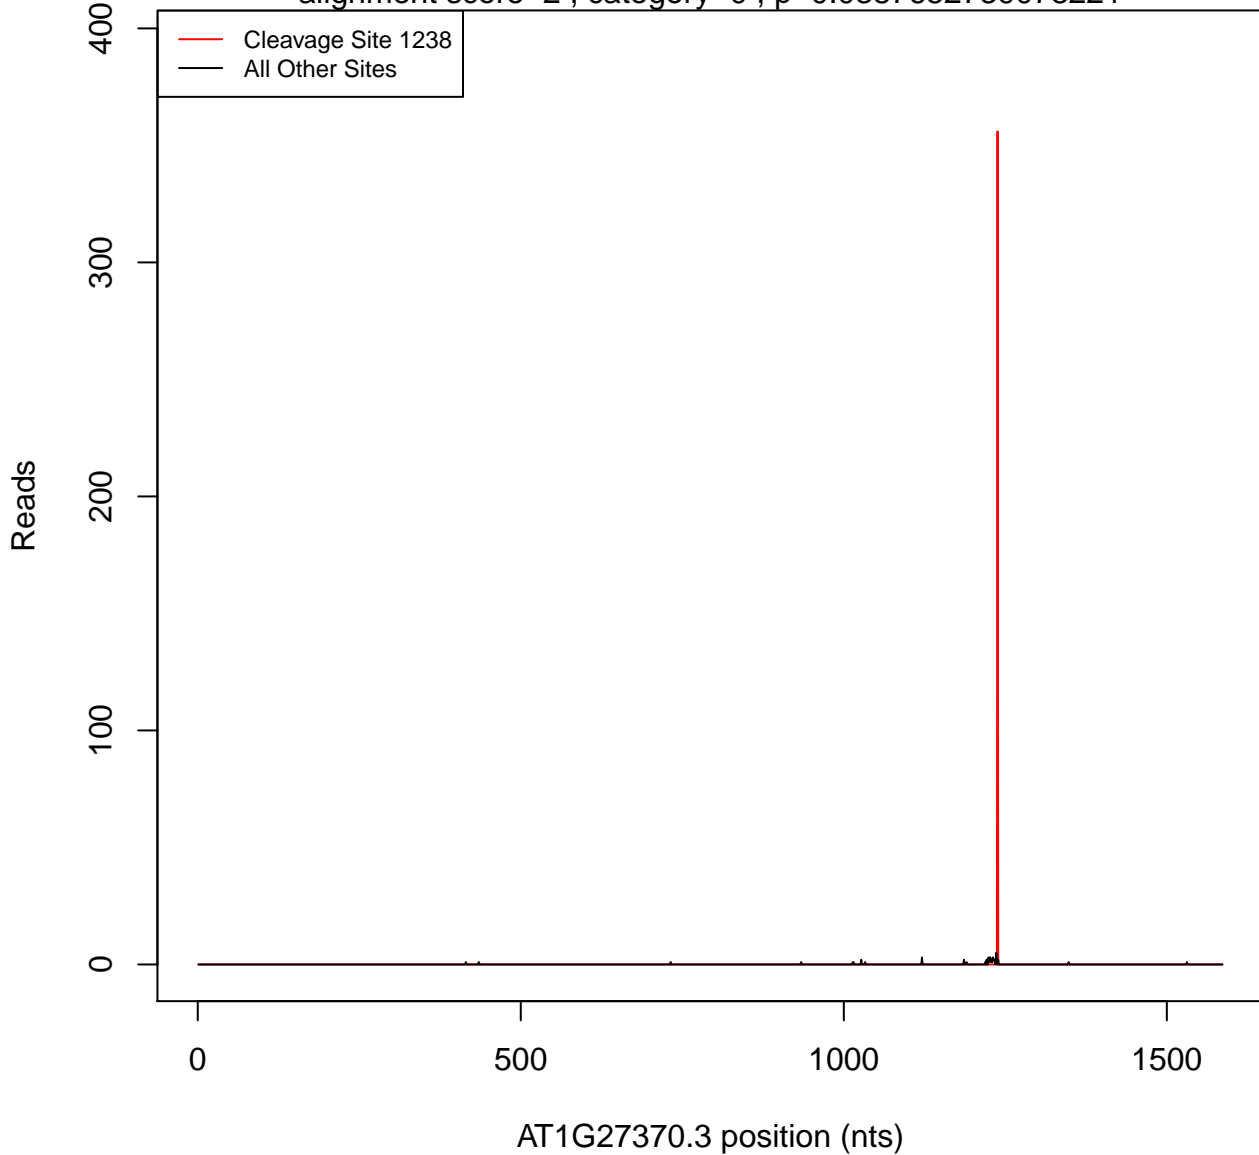

# ath-miR156h slicing AT1G27370.3 at nt 1238

alignment score=2 , category=0 , p=0.0432259504343167

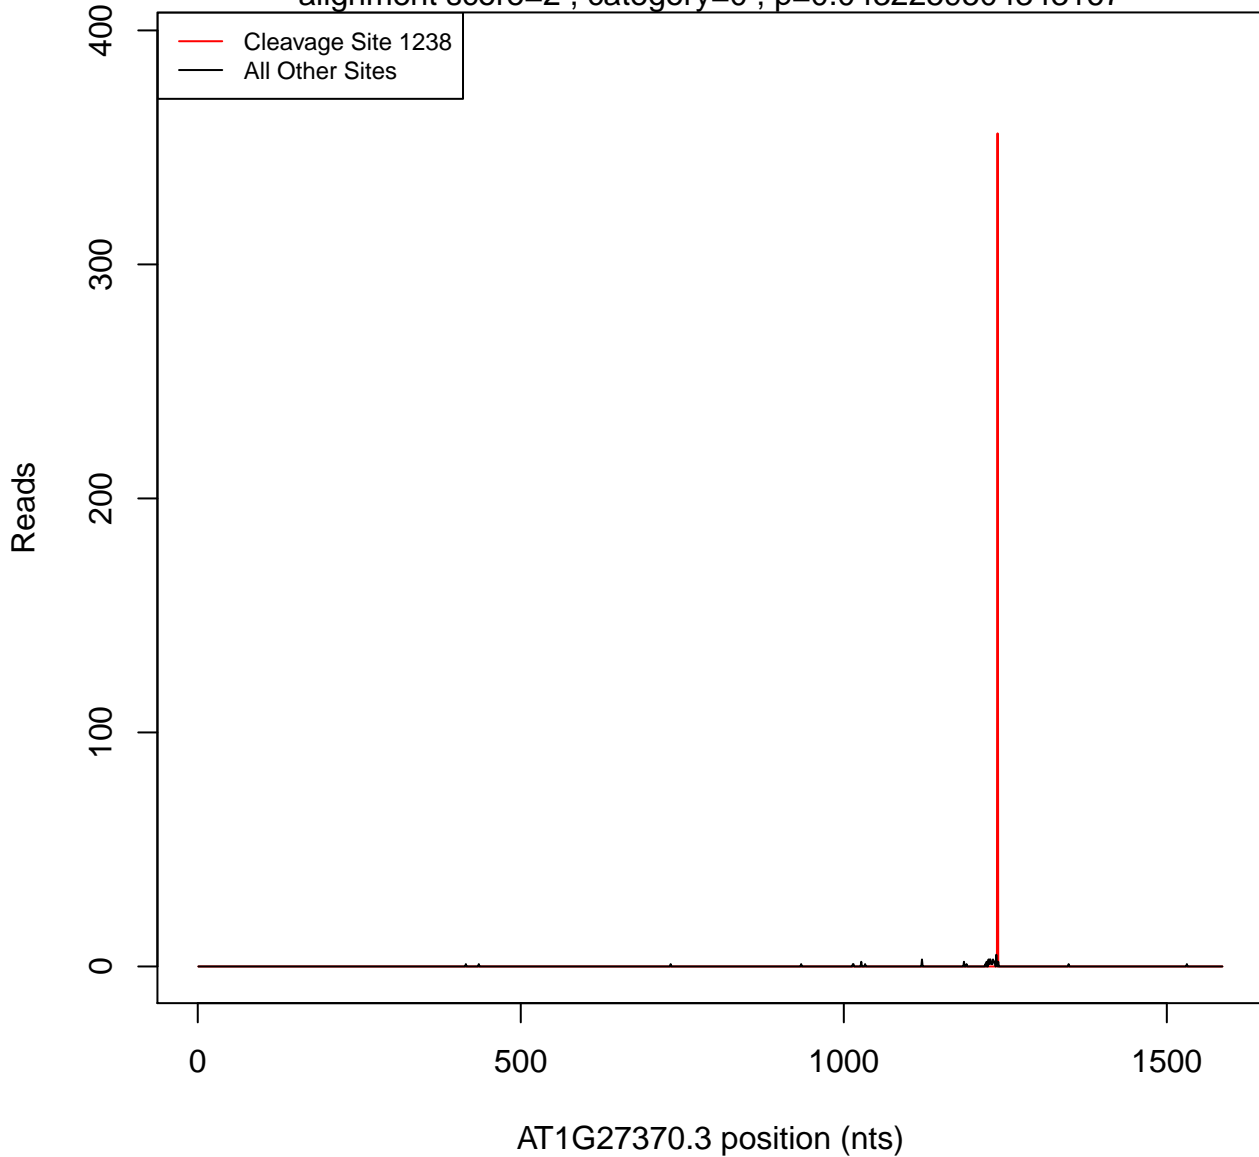

# ath-miR156i slicing AT1G27370.3 at nt 1238

alignment score=1 , category=0 , p=0.0482697796921467

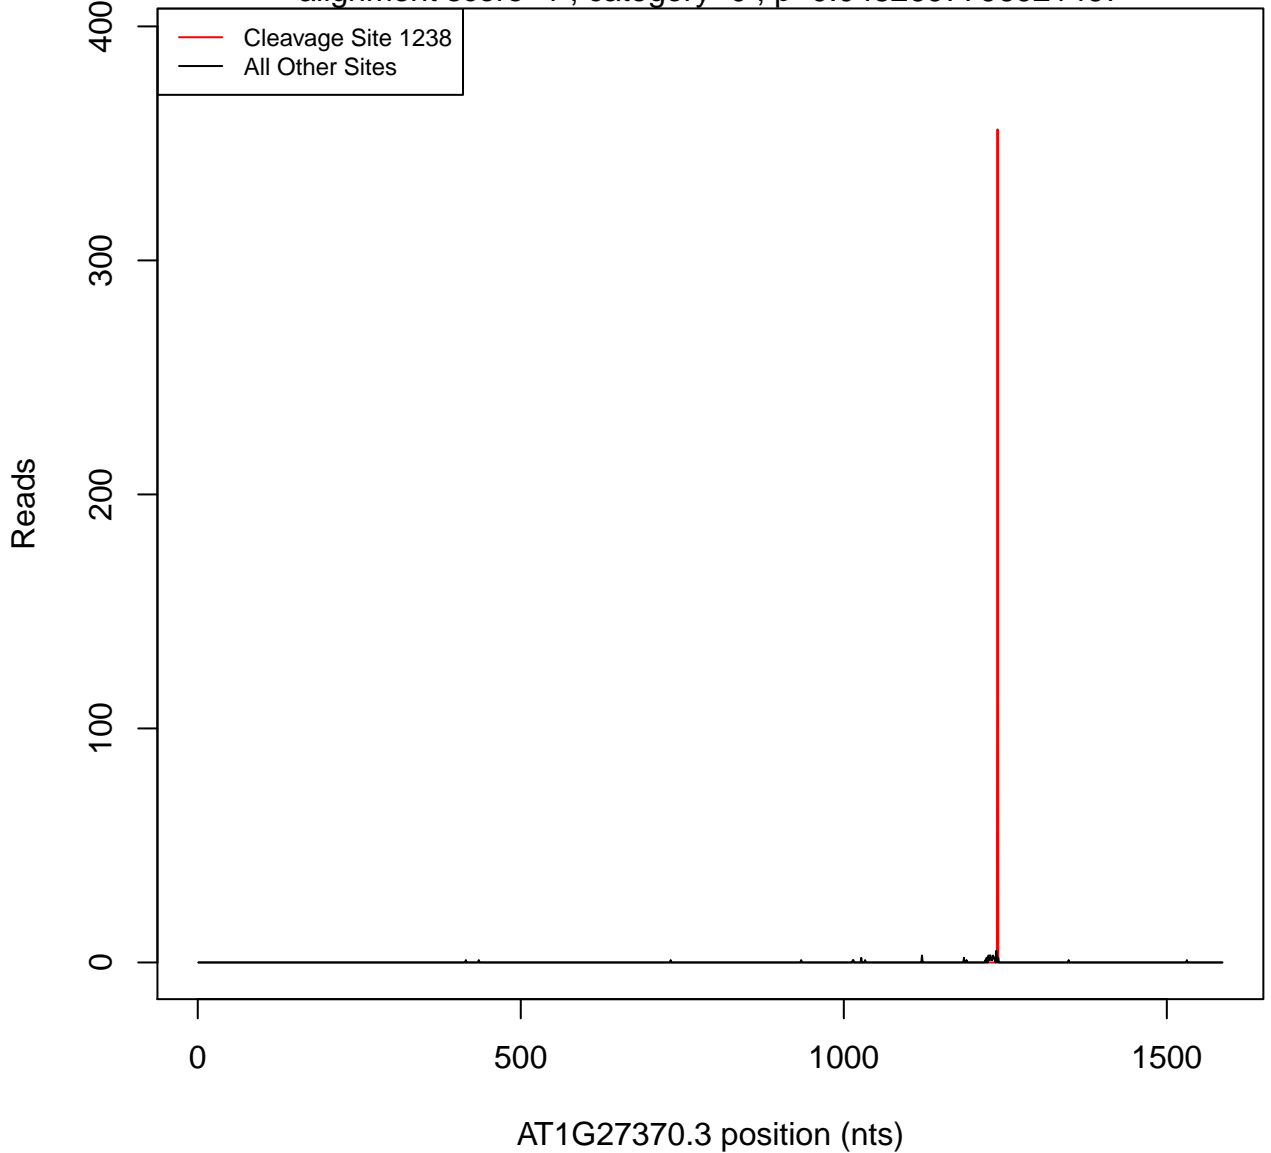

# ath-miR156j slicing AT1G27370.3 at nt 1238

alignment score=0 , category=0 , p=0.0524860420603949

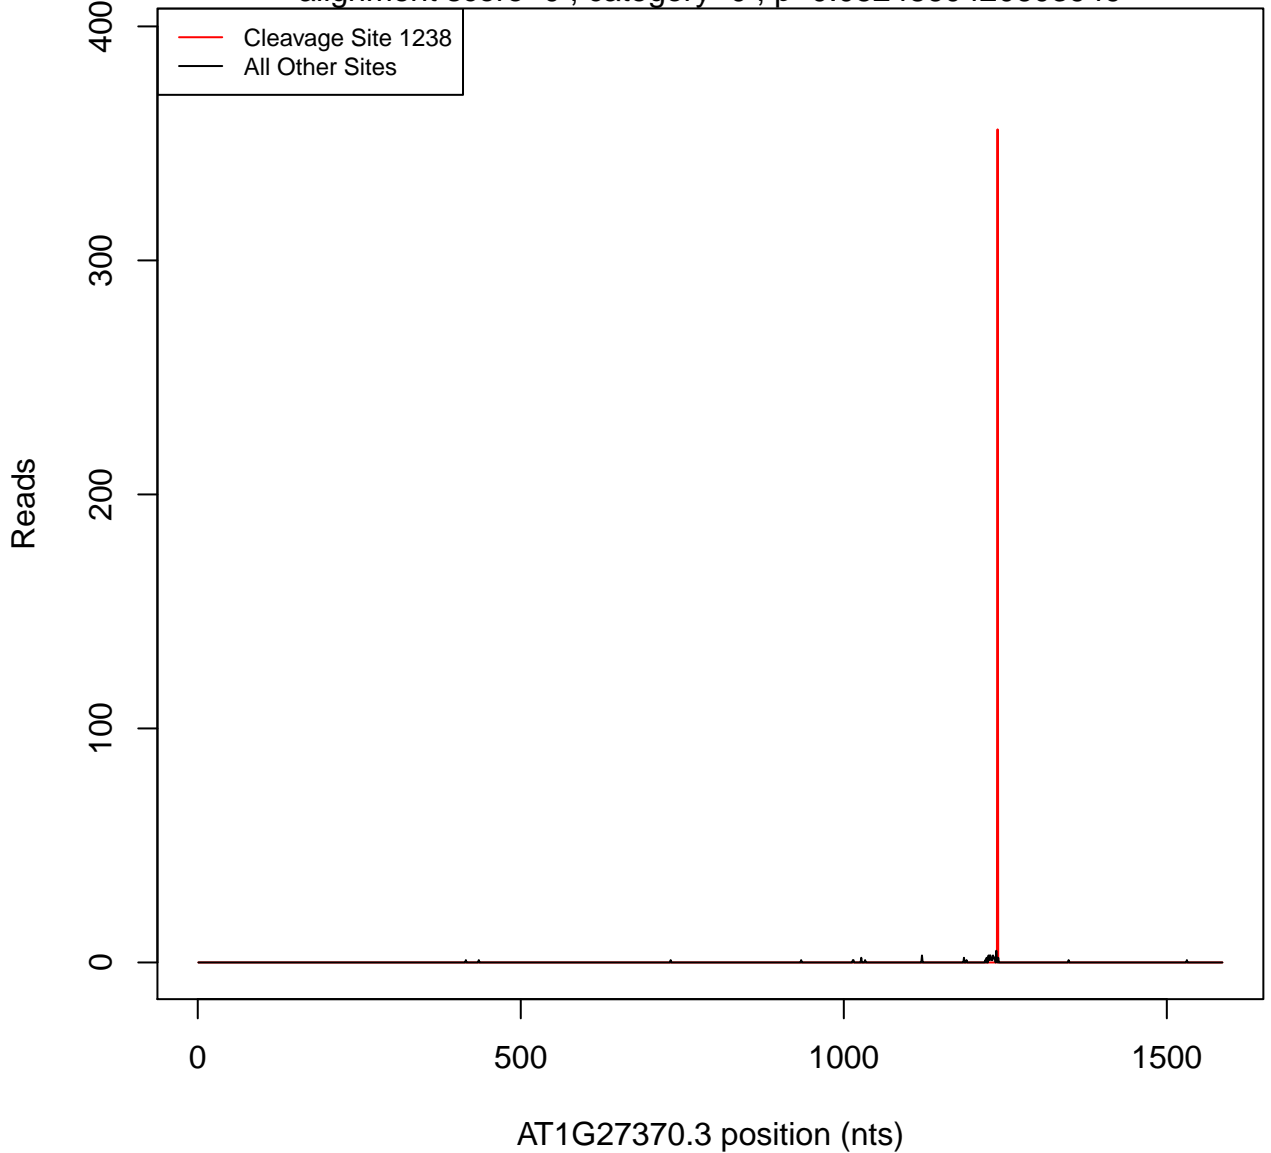



# ath-miR157d slicing AT1G27370.3 at nt 1238

alignment score=2 , category=0 , p=0.0432259504343167



# ath-miR156a slicing AT1G27370.4 at nt 1325

alignment score=1 , category=0 , p=0.0456503157497291

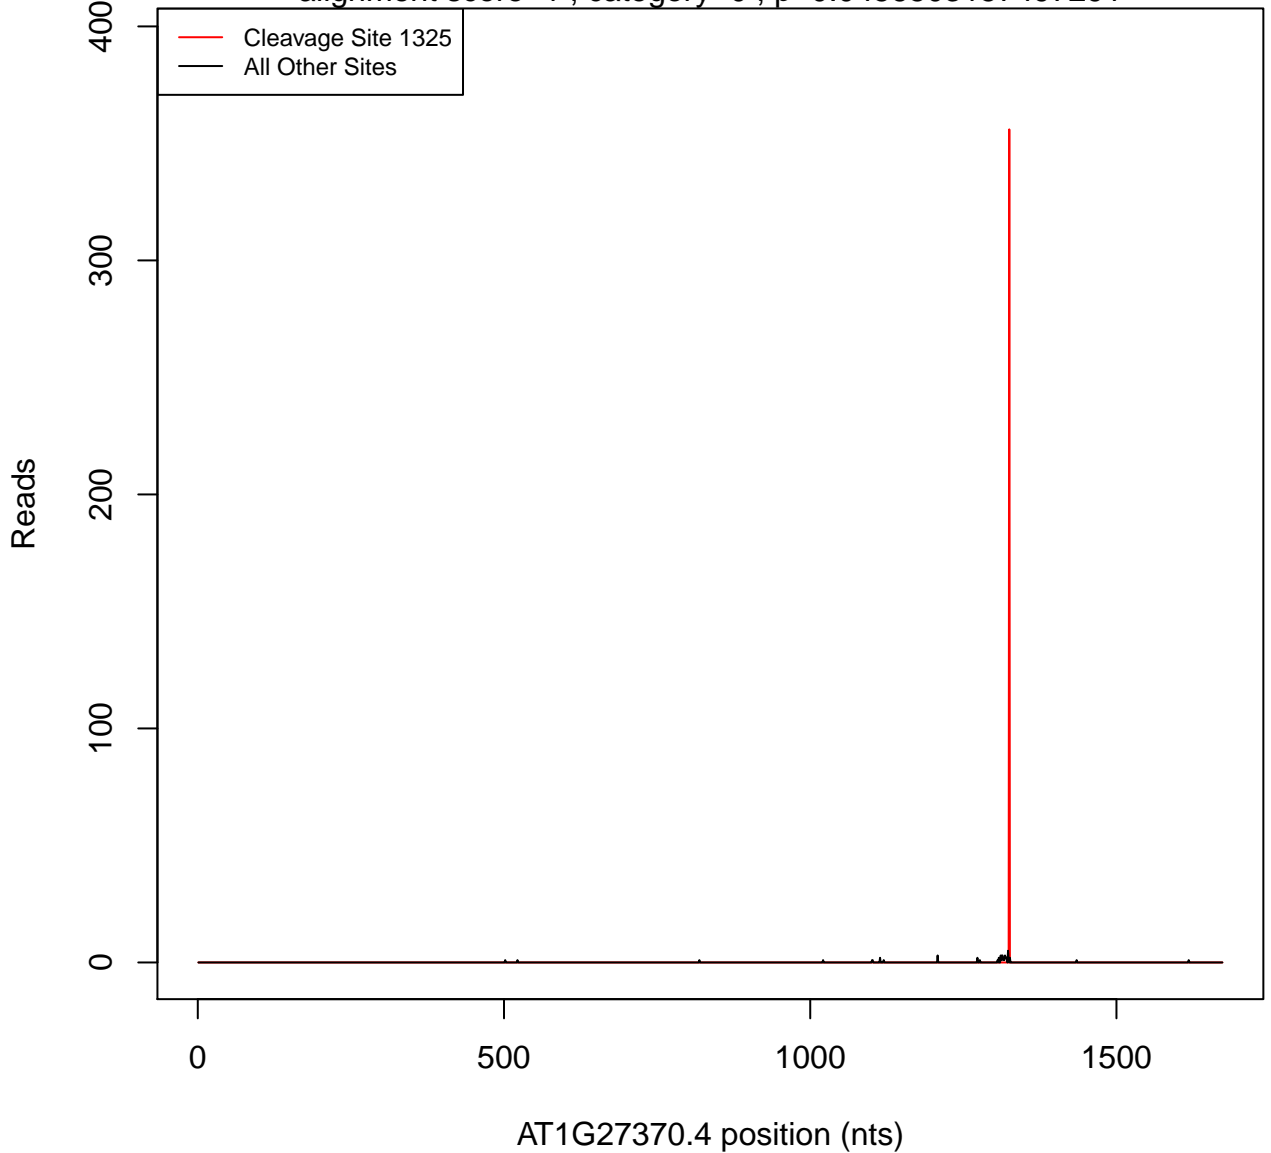

# ath-miR156b slicing AT1G27370.4 at nt 1325

alignment score=1 , category=0 , p=0.0456503157497291

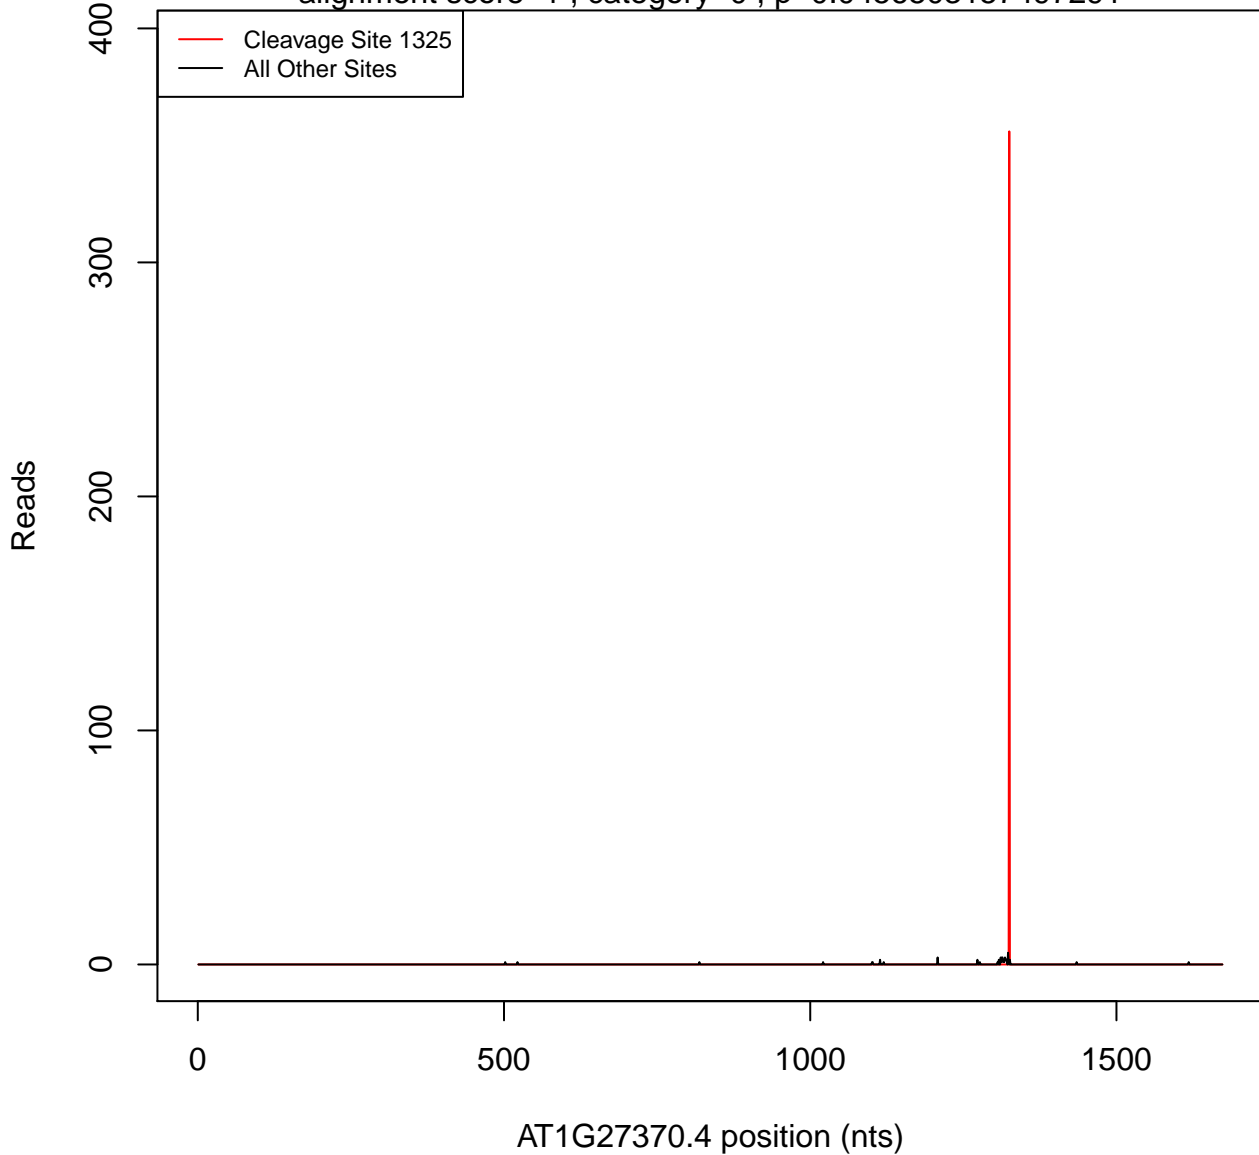

# ath-miR156c slicing AT1G27370.4 at nt 1325

alignment score=1 , category=0 , p=0.0456503157497291



# ath-miR156d slicing AT1G27370.4 at nt 1325

alignment score=1 , category=0 , p=0.0456503157497291

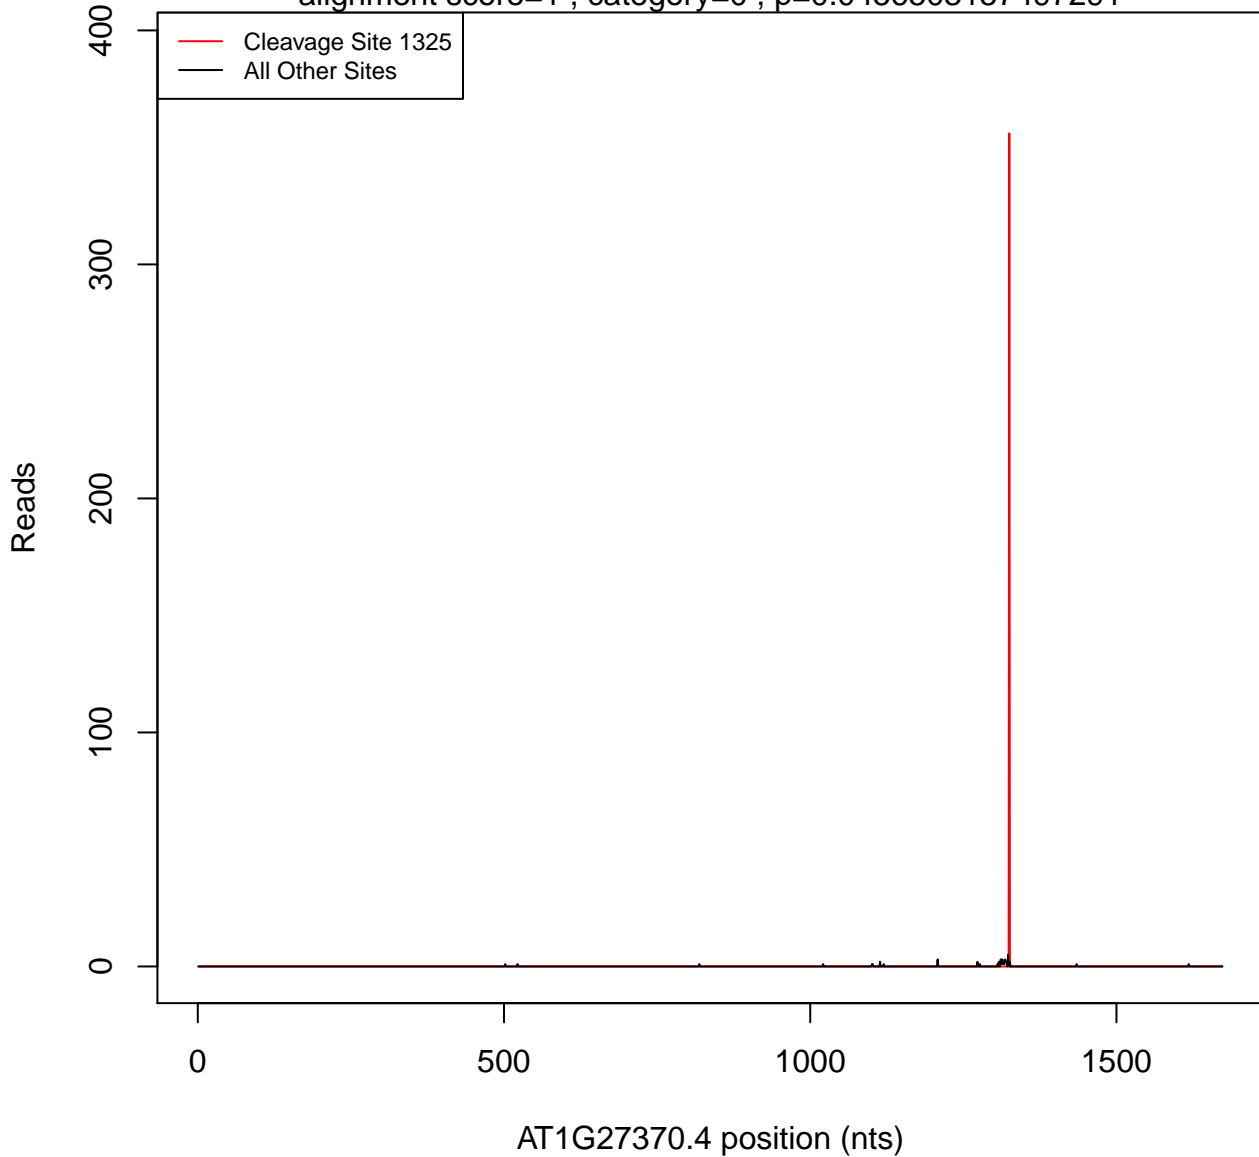

# ath-miR156e slicing AT1G27370.4 at nt 1325

alignment score=1 , category=0 , p=0.0456503157497291



# ath-miR156f slicing AT1G27370.4 at nt 1325

alignment score=1 , category=0 , p=0.0456503157497291



# ath-miR156g slicing AT1G27370.4 at nt 1325

alignment score=2 , category=0 , p=0.0387652739078221

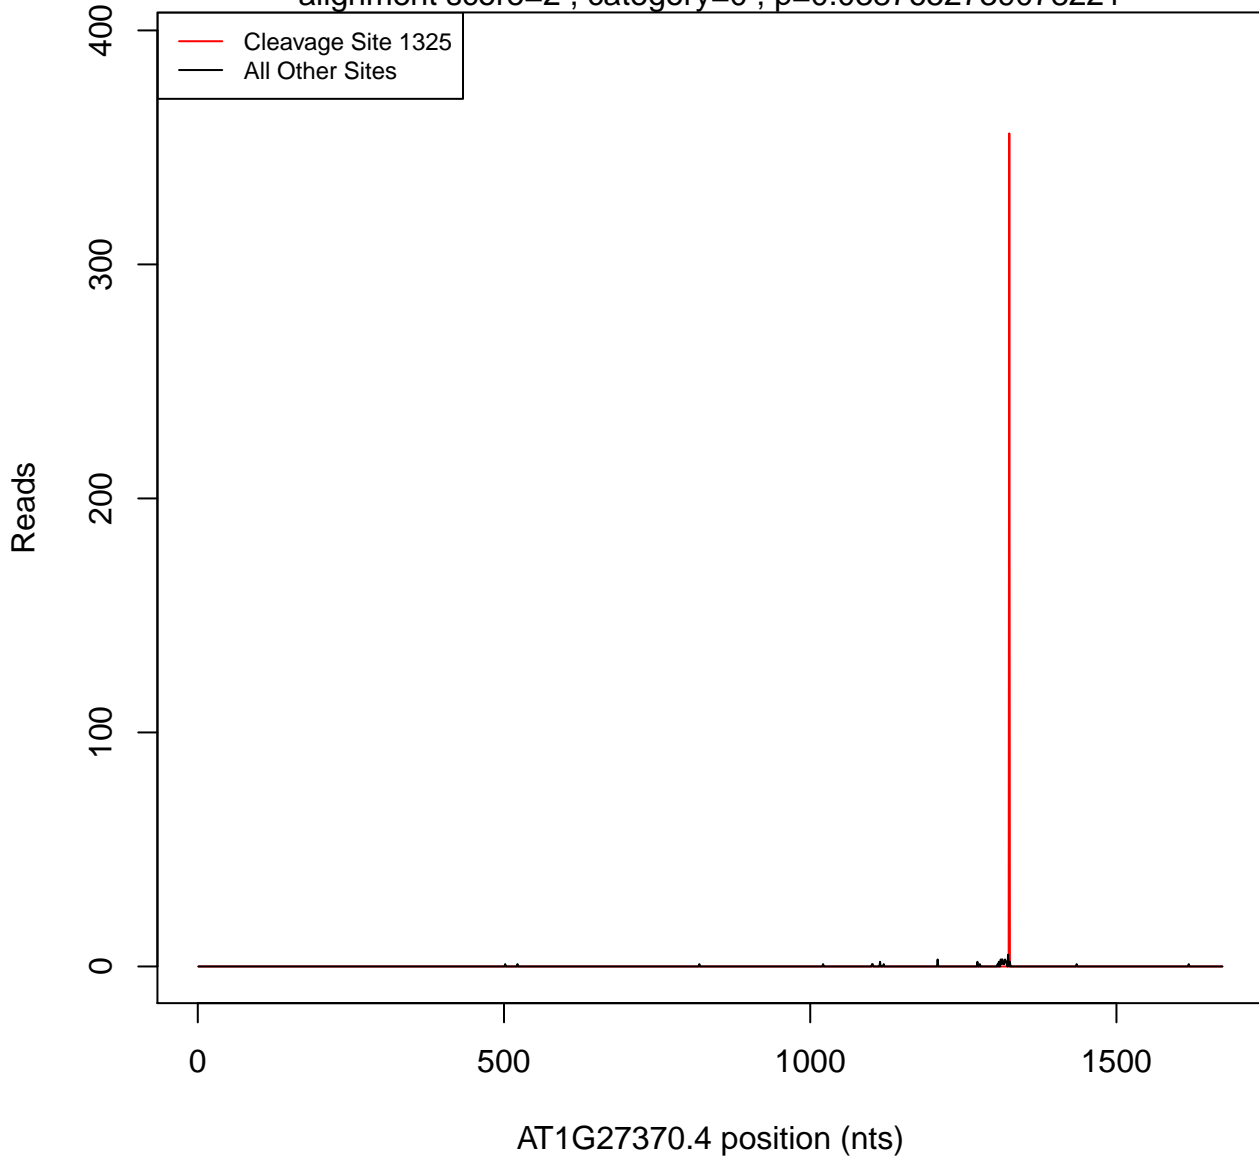



# ath-miR156h slicing AT1G27370.4 at nt 1325

alignment score=2 , category=0 , p=0.0432259504343167

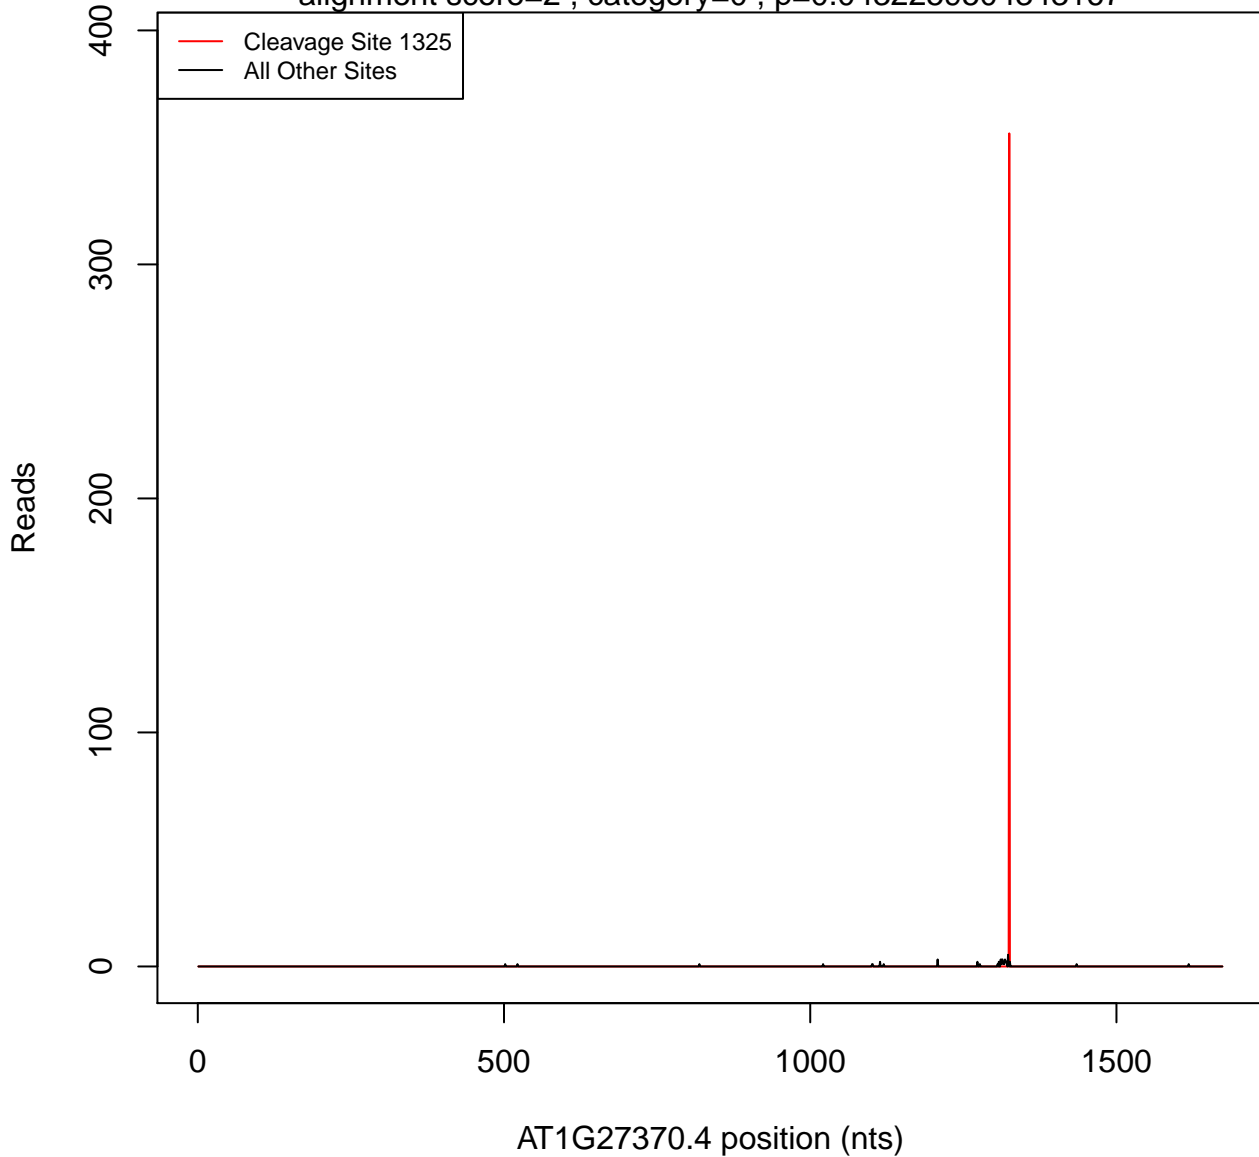

# ath-miR156i slicing AT1G27370.4 at nt 1325

alignment score=1 , category=0 , p=0.0482697796921467

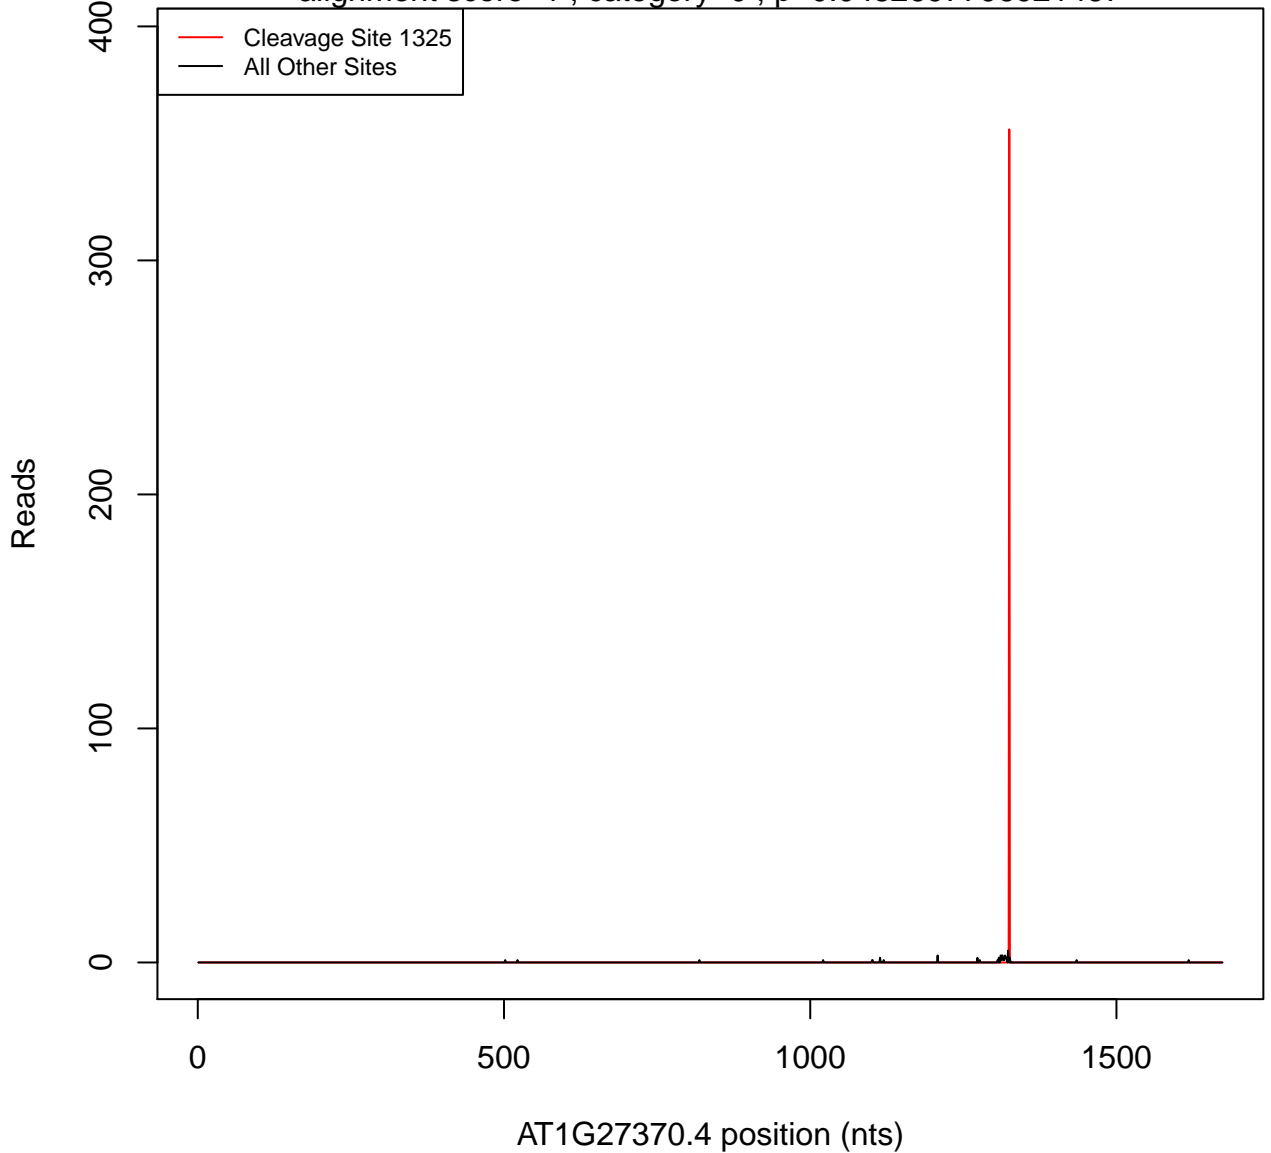

# ath-miR156j slicing AT1G27370.4 at nt 1325

alignment score=0 , category=0 , p=0.0524860420603949

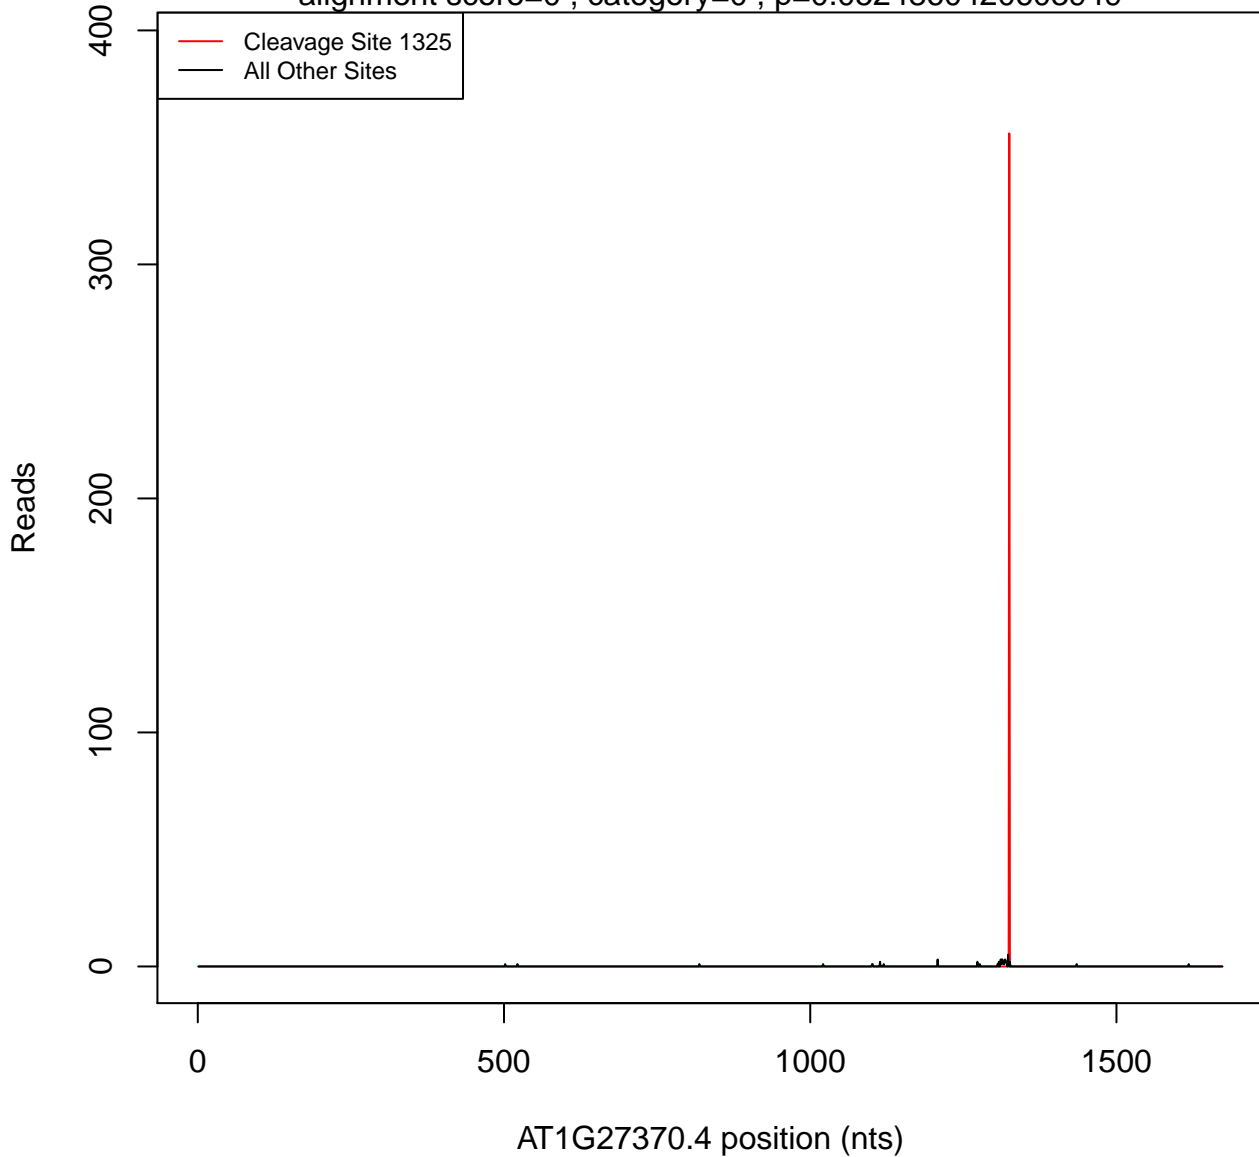

# ath-miR157d slicing AT1G27370.4 at nt 1325

alignment score=2 , category=0 , p=0.0432259504343167

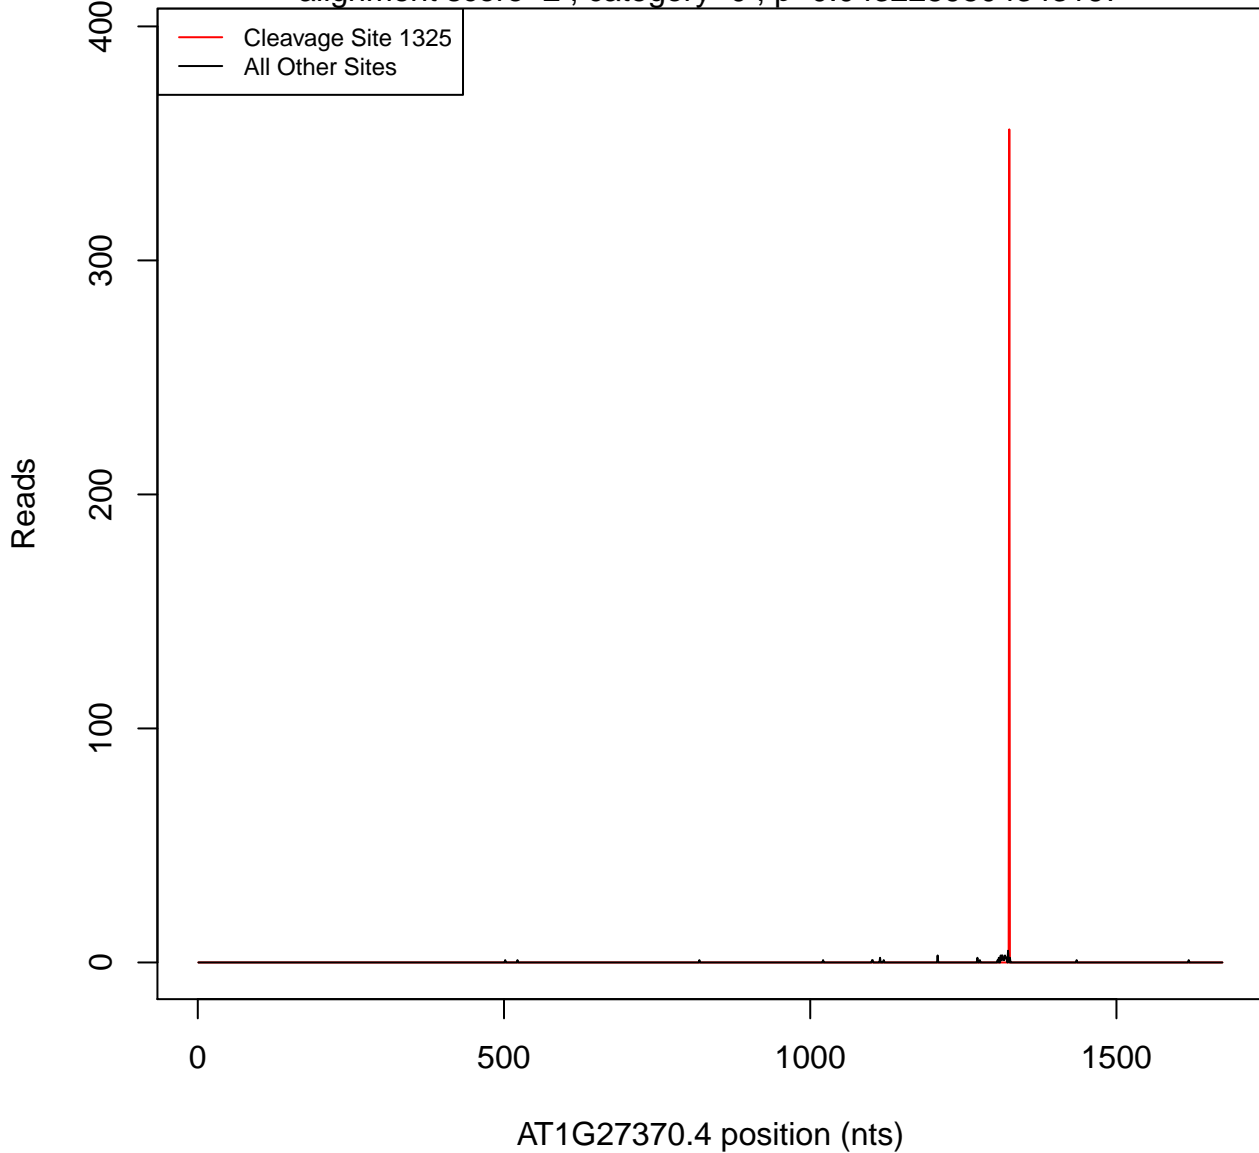

# ath-miR319a slicing AT1G30210.1 at nt 1142

alignment score=2.5 , category=1 , p=0.00773423857972566

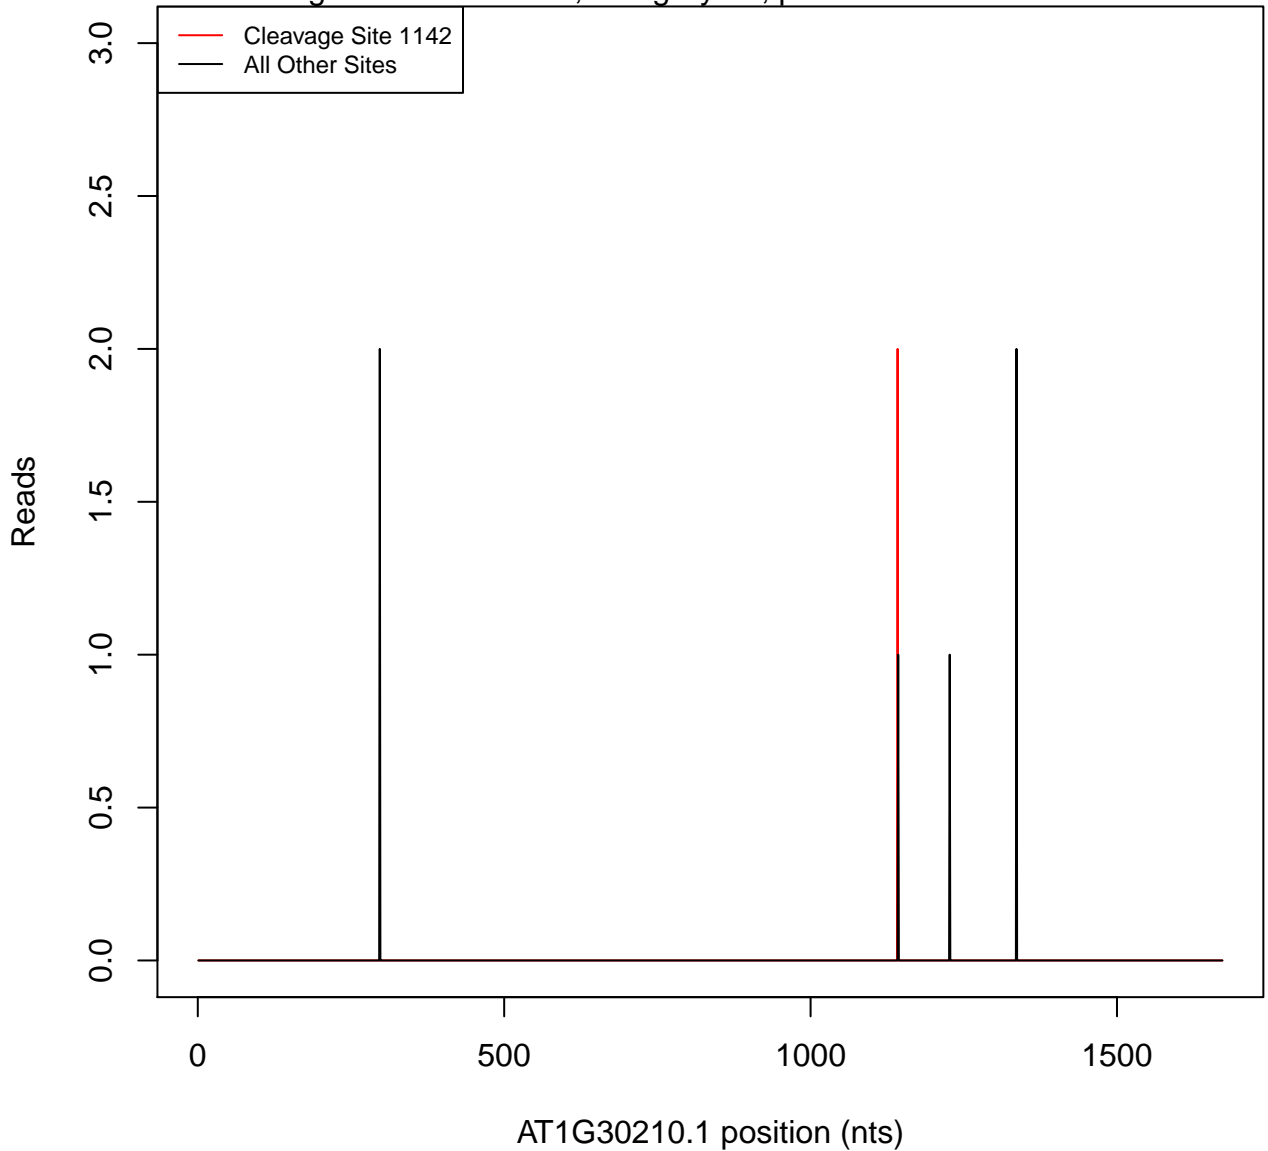

# ath-miR319b slicing AT1G30210.1 at nt 1142

alignment score=2.5 , category=1 , p=0.00773423857972566

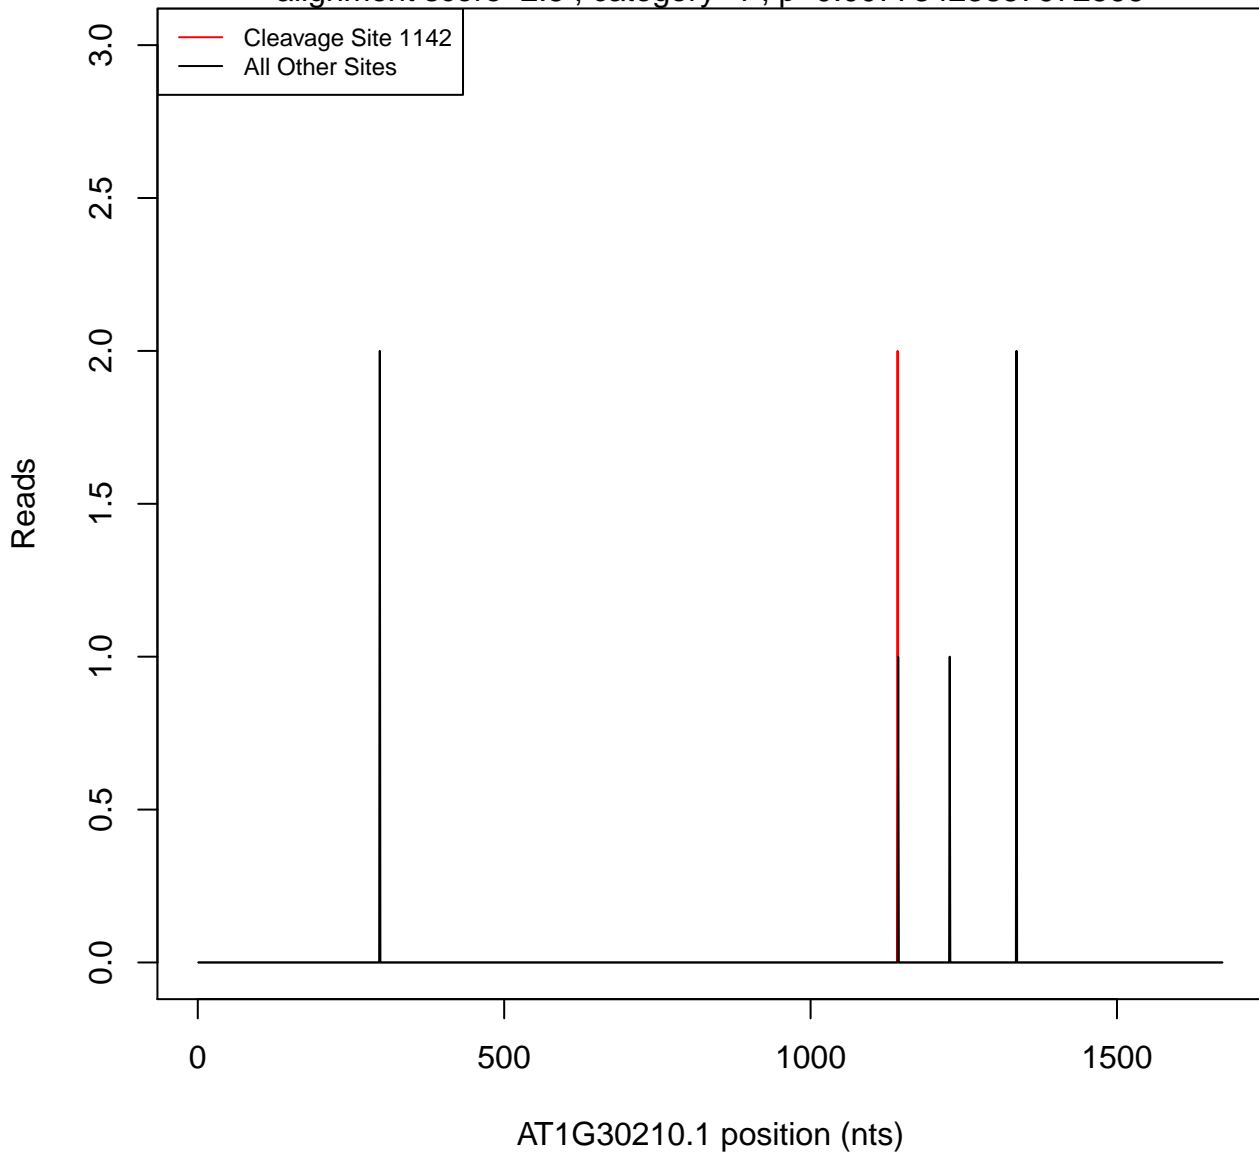

# ath-miR319c slicing AT1G30210.1 at nt 1142

alignment score=3.5 , category=1 , p=0.00927389322554639

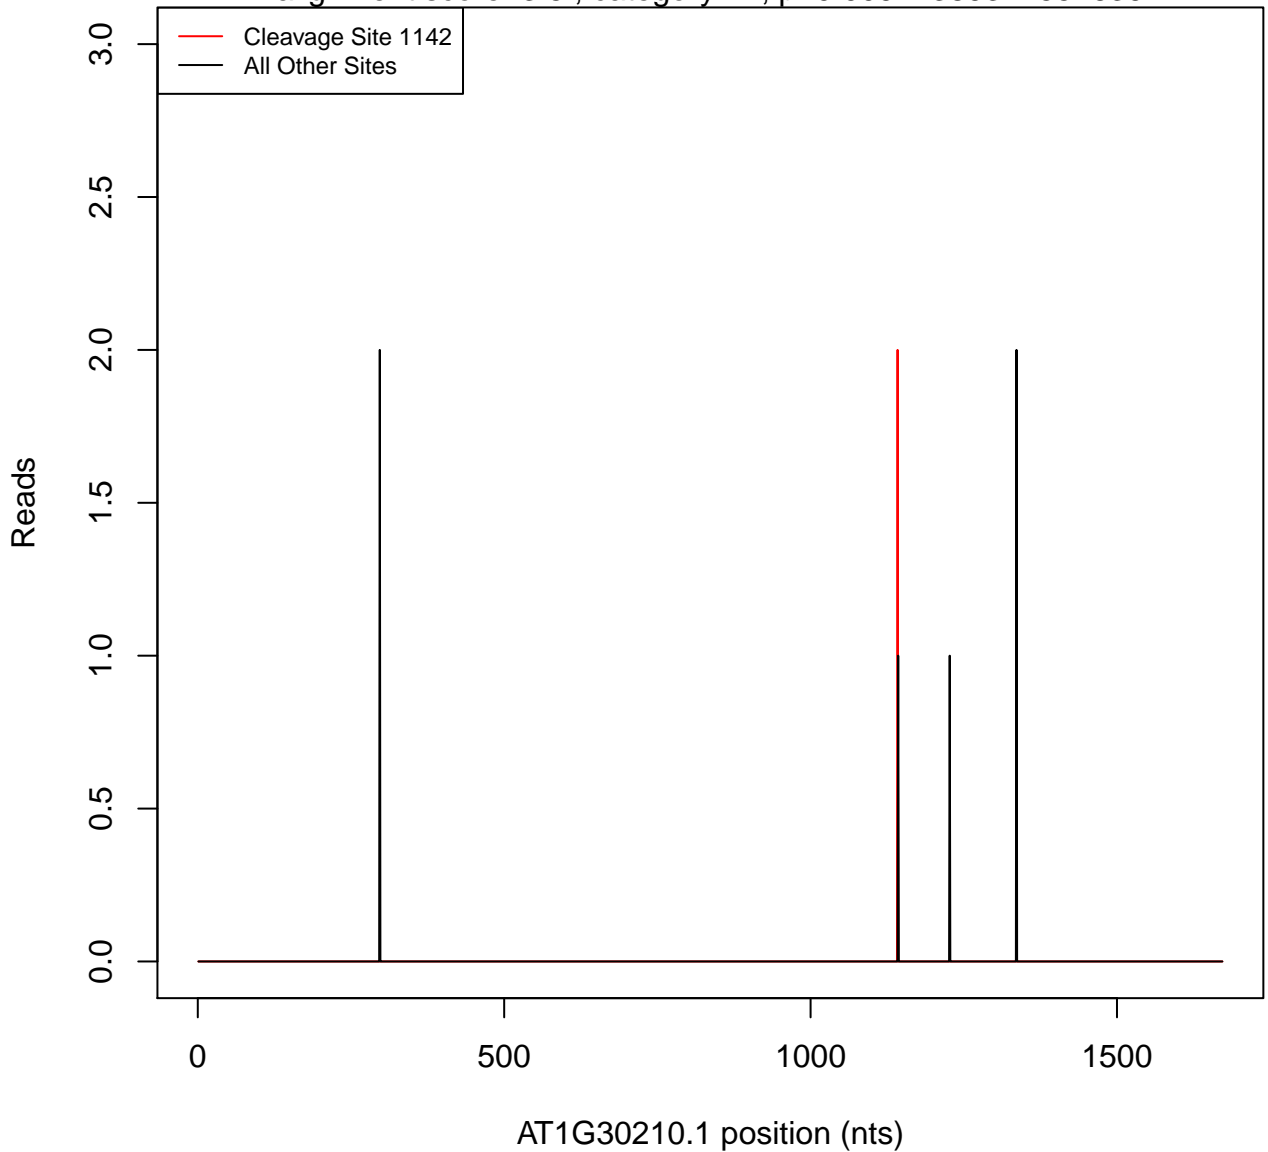

# rco-miR319d\_2ss20TC21TA slicing AT1G30210.1 at nt 1142

alignment score=3.5 , category=1 , p=0.00464774739067697

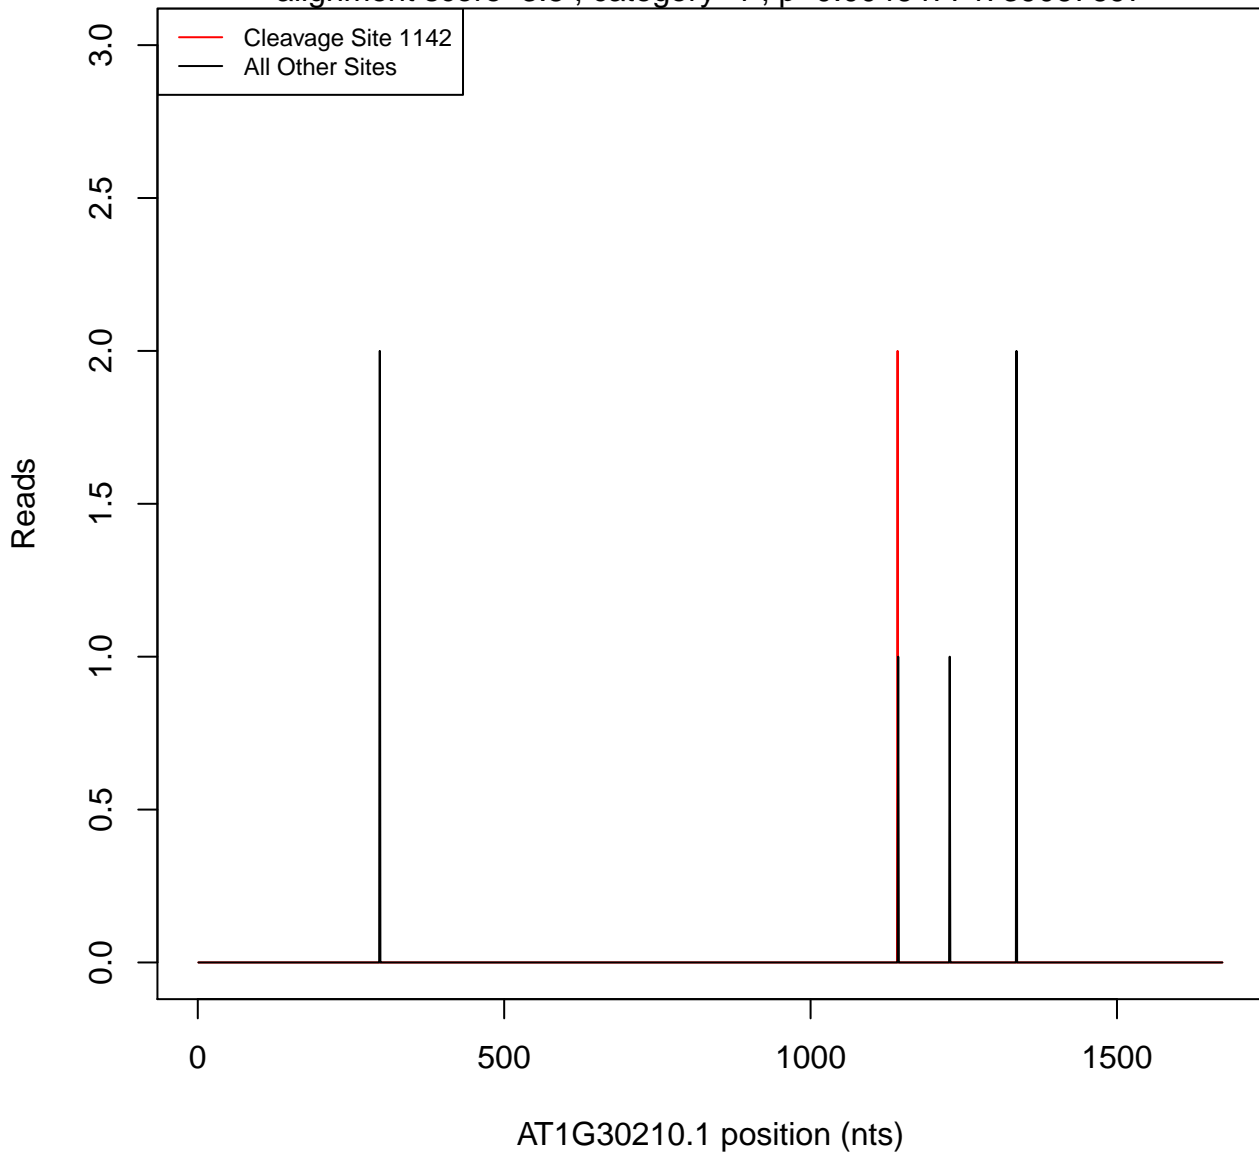



# ath-miR319a slicing AT1G30210.2 at nt 1023

alignment score=2.5 , category=1 , p=0.00773423857972566

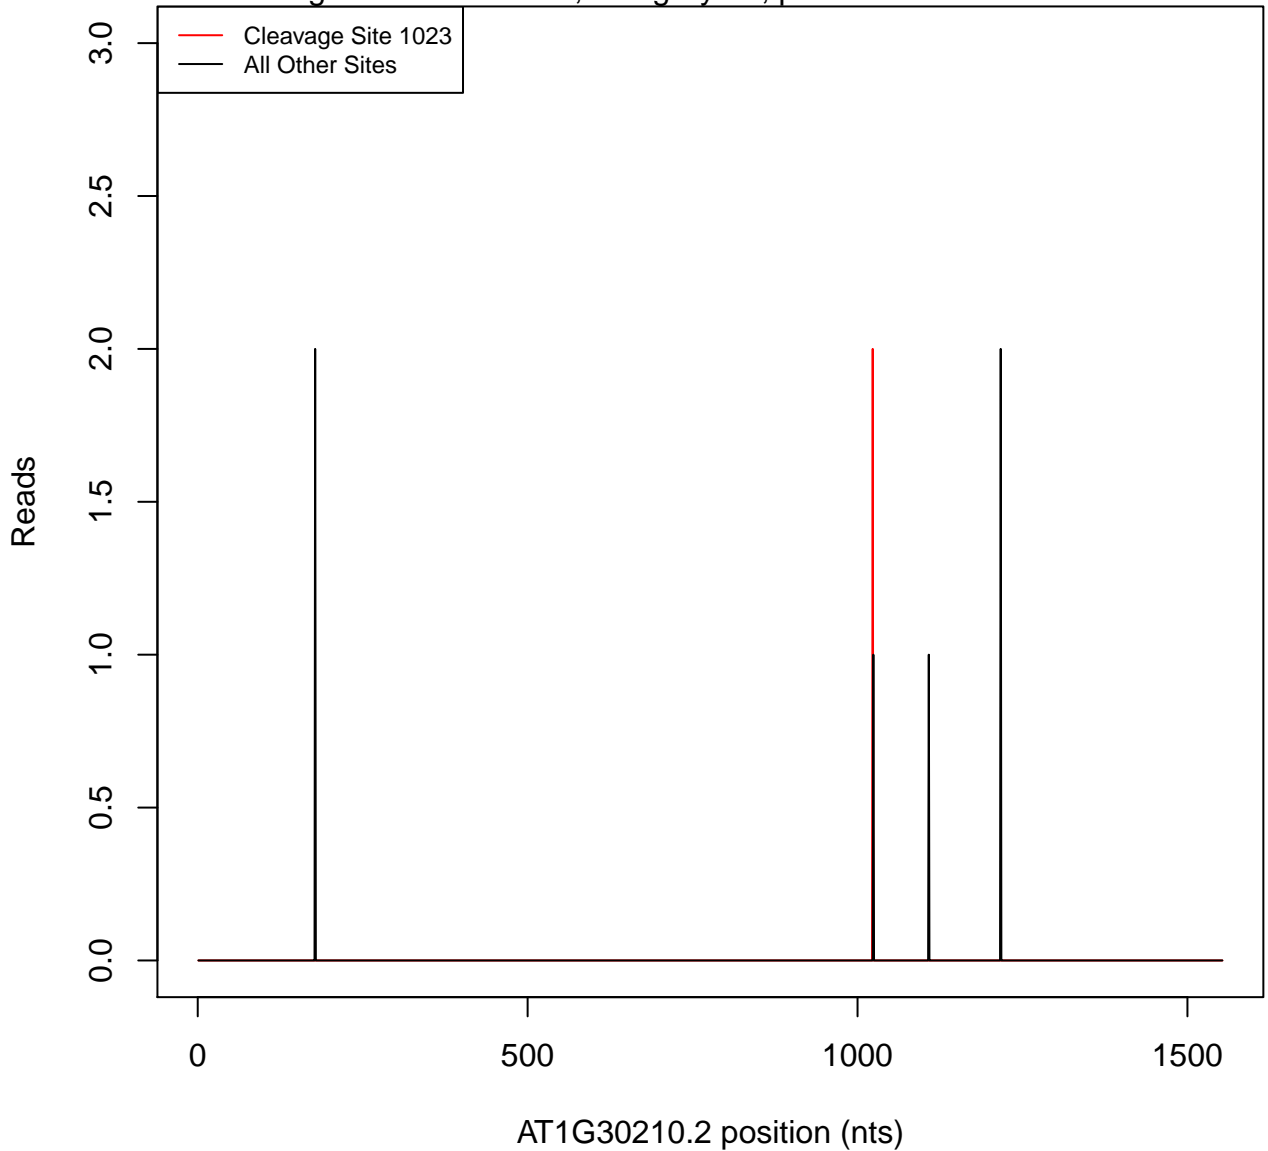

# ath-miR319b slicing AT1G30210.2 at nt 1023

alignment score=2.5 , category=1 , p=0.00773423857972566

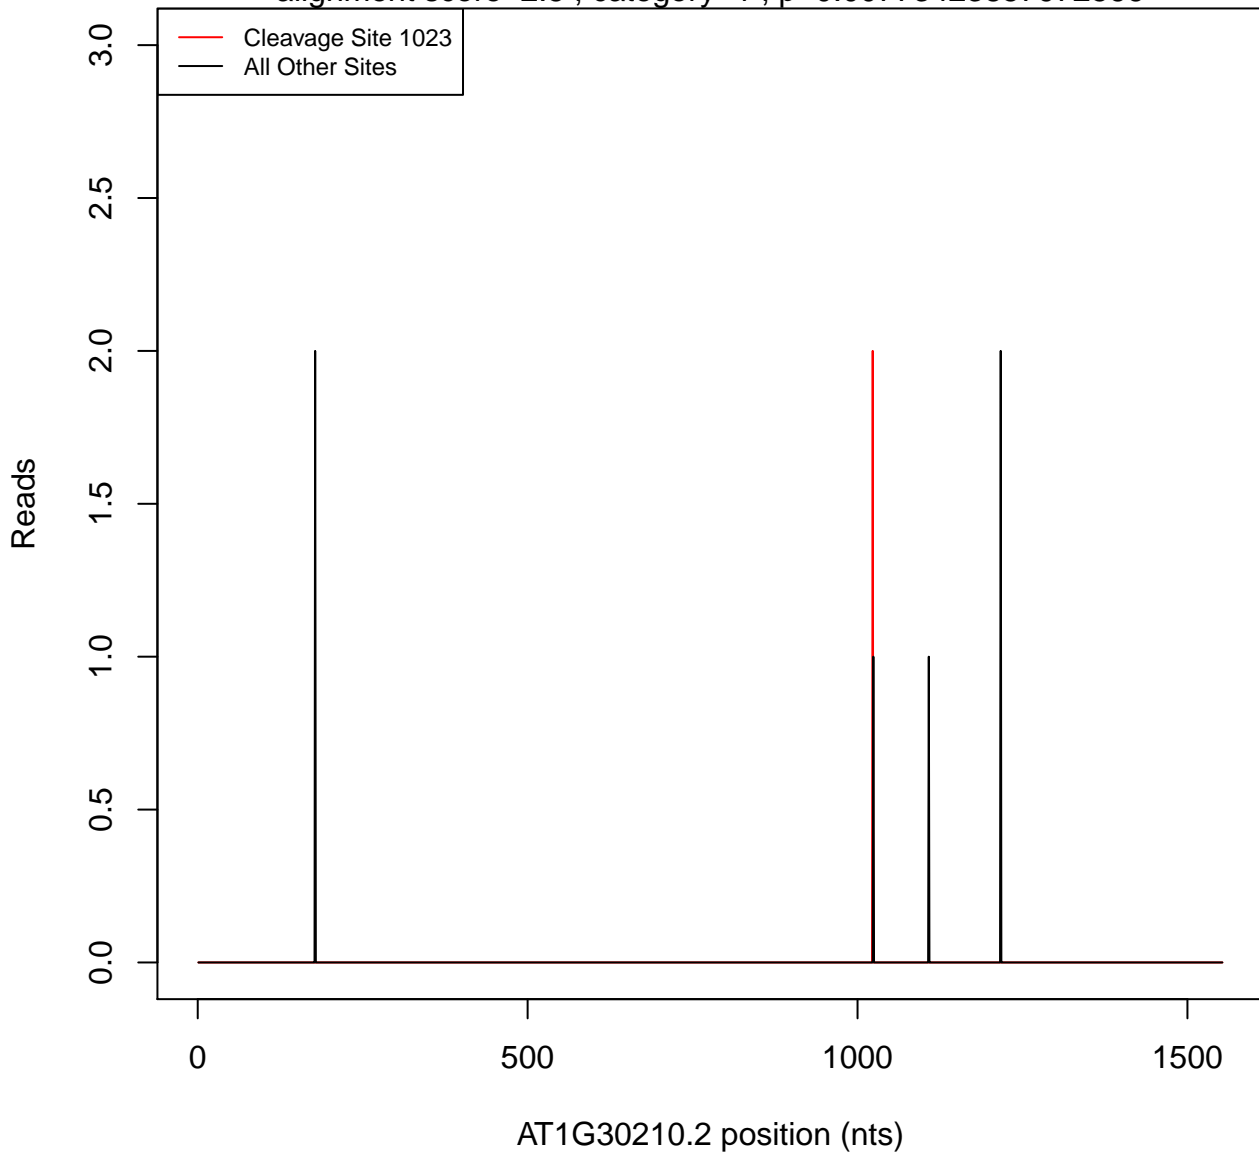

# ath-miR319c slicing AT1G30210.2 at nt 1023

alignment score=3.5 , category=1 , p=0.00927389322554639

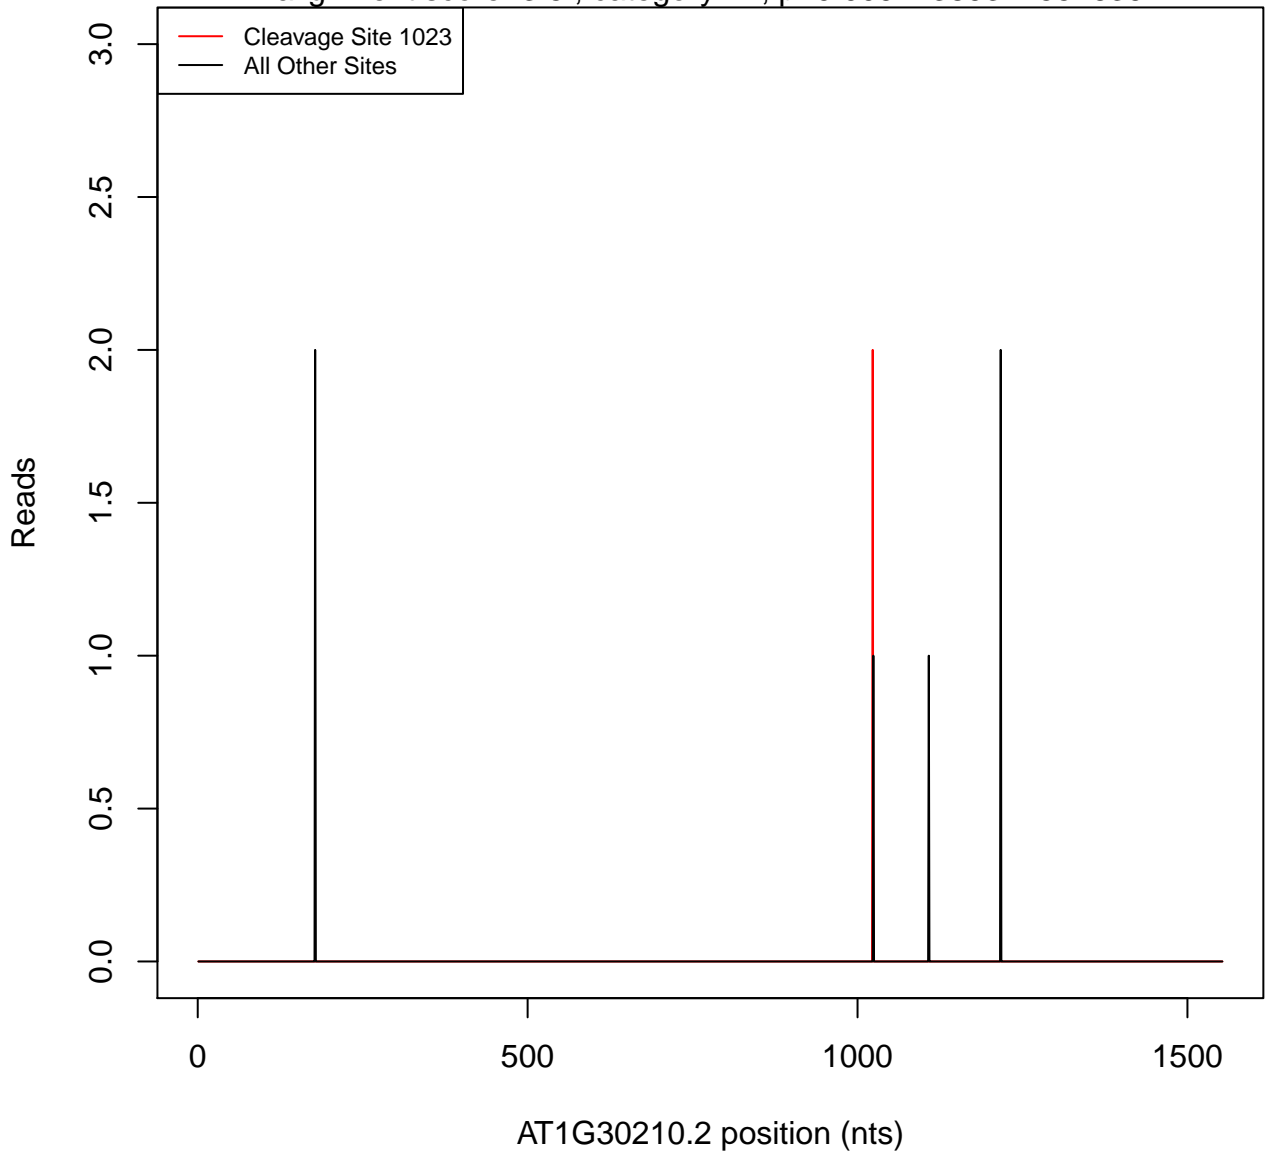

# rco-miR319d\_2ss20TC21TA slicing AT1G30210.2 at nt 1023

alignment score=3.5 , category=1 , p=0.00464774739067697

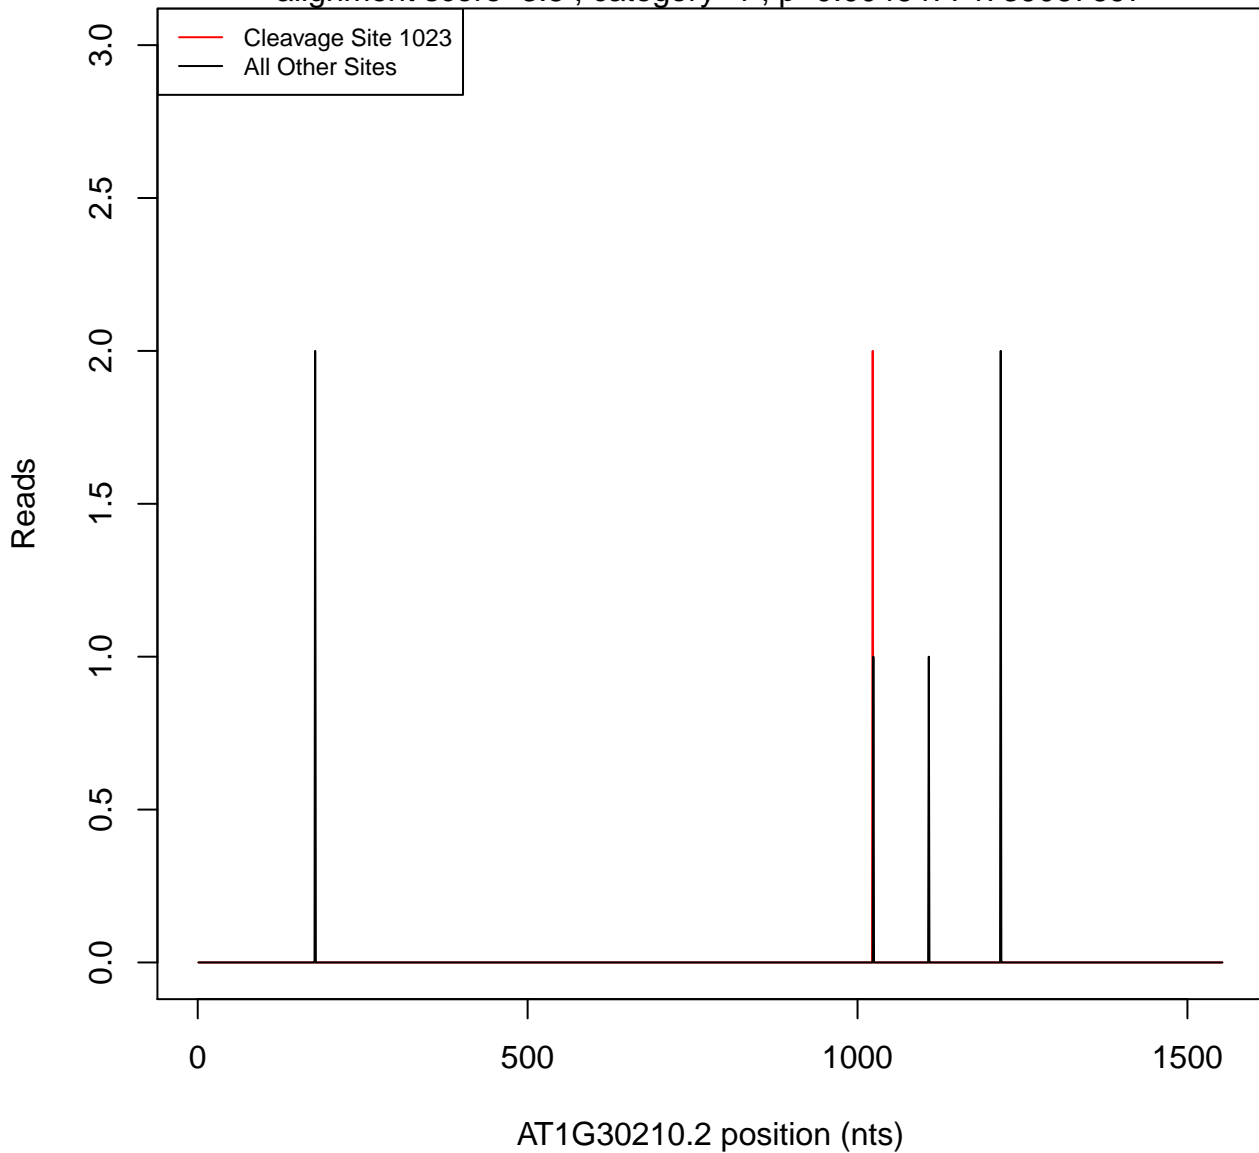

# ath-miR167c slicing AT1G30330.1 at nt 3326

alignment score=3.5 , category=4 , p=0.0878397022113475

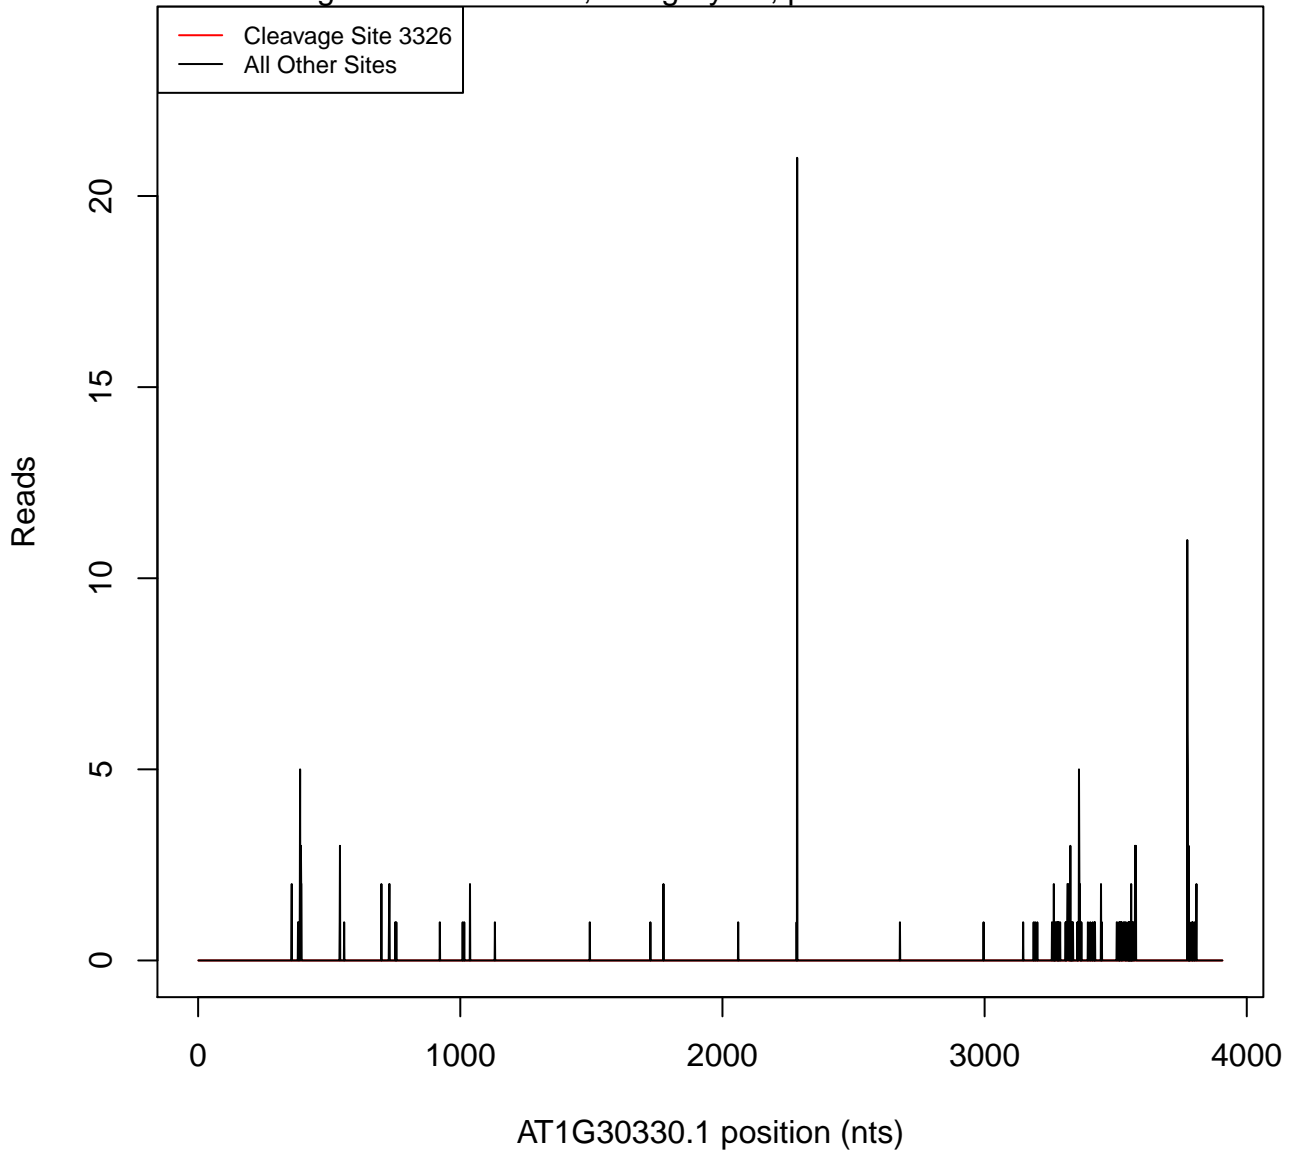

# ath-miR167c slicing AT1G30330.2 at nt 3246

alignment score=3.5 , category=4 , p=0.0878397022113475

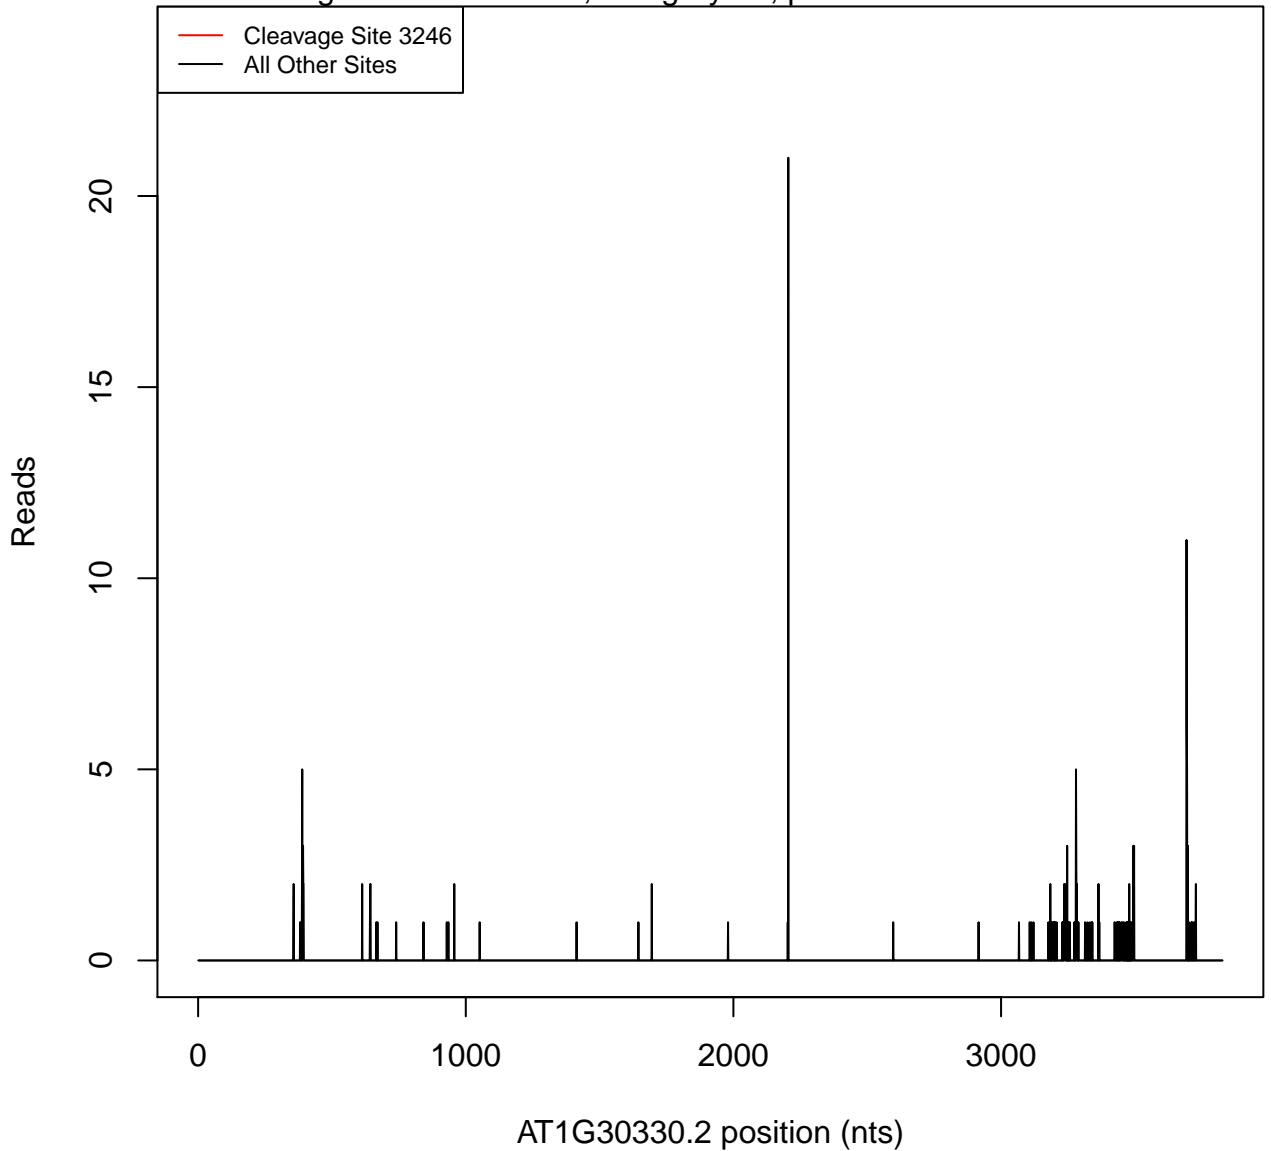

# ath-miR403 slicing AT1G31280.1 at nt 3233

alignment score=1 , category=0 , p=0.00274476325150719

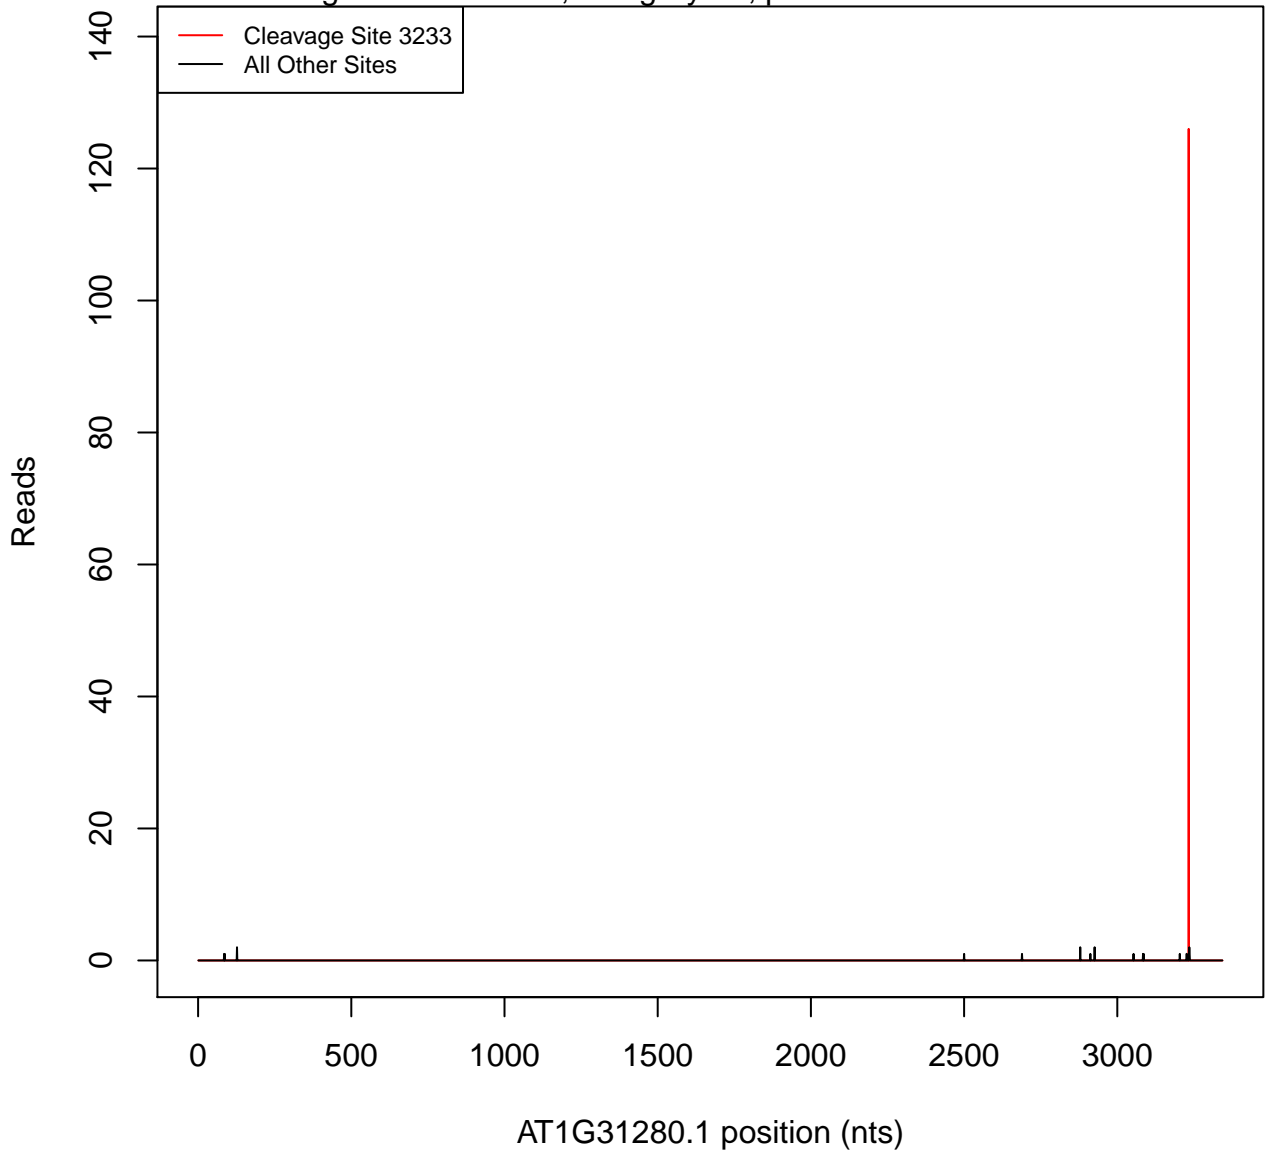

# ath-miR827 slicing AT1G33140.1 at nt 626

alignment score=4 , category=4 , p=0.0772962837552712

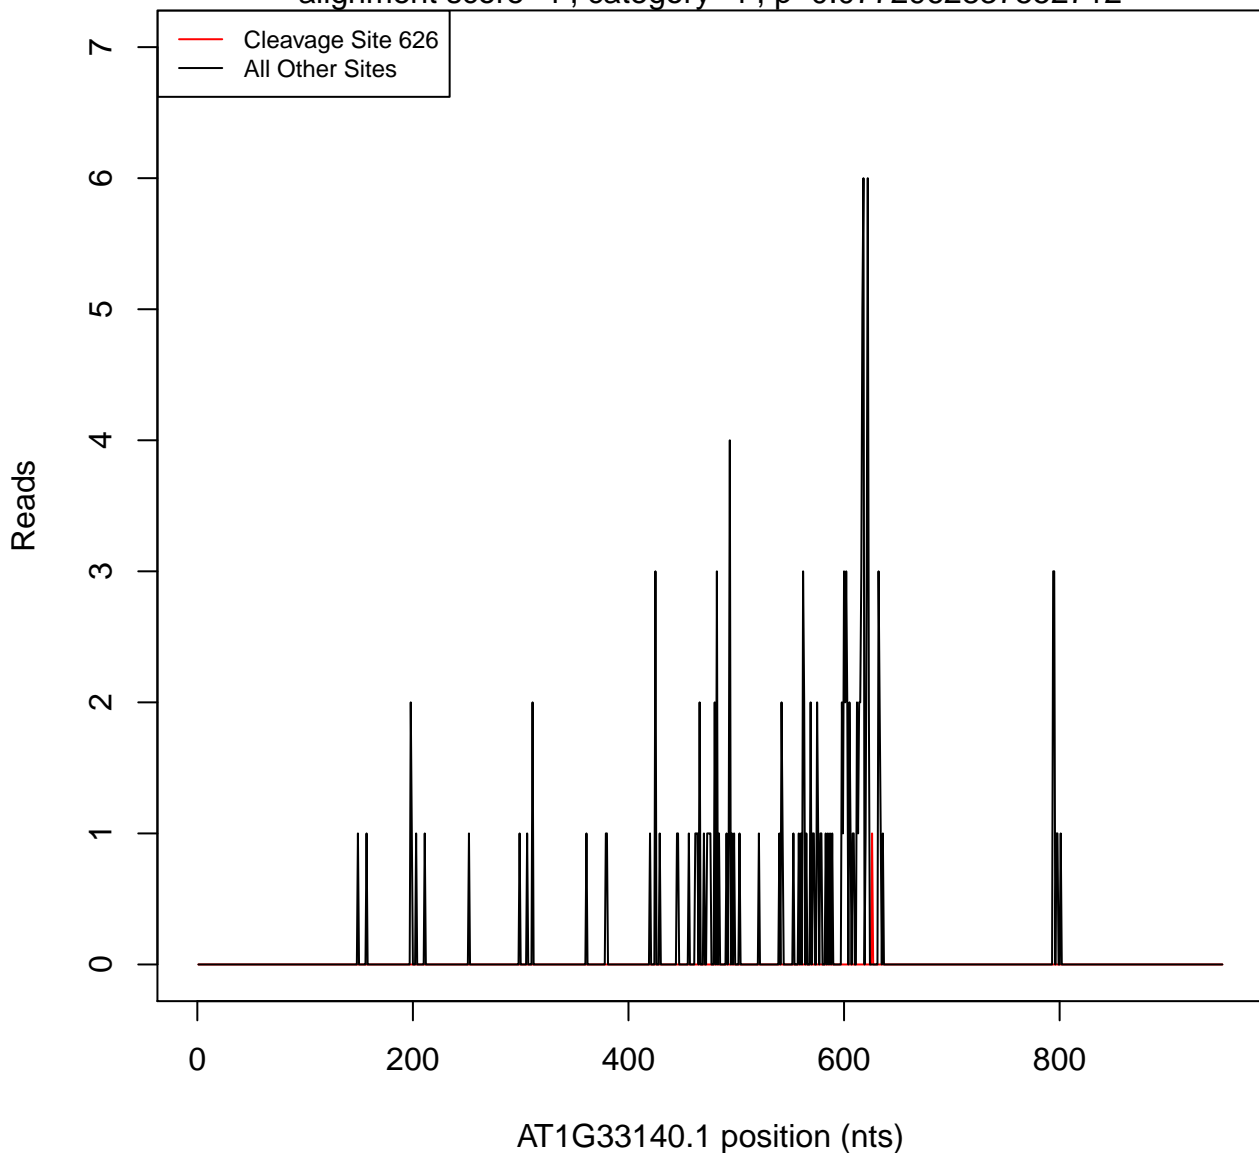



# ath-miR168a slicing AT1G48410.1 at nt 522

alignment score=4 , category=3 , p=0.013935588046682

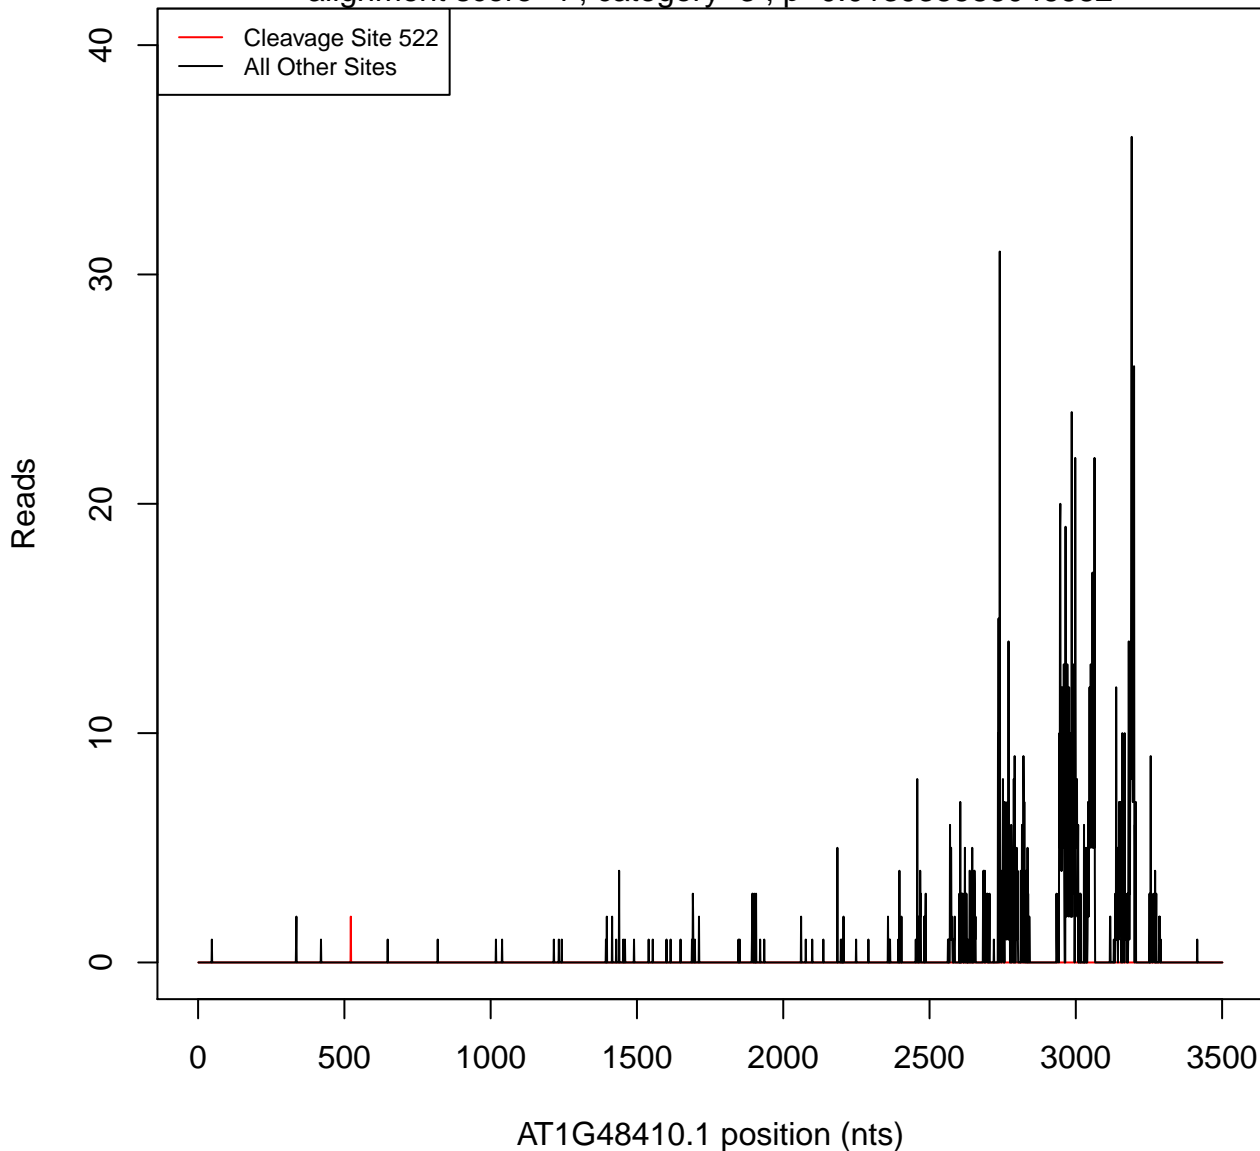

# ath-miR168b slicing AT1G48410.1 at nt 522

alignment score=4 , category=3 , p=0.013935588046682

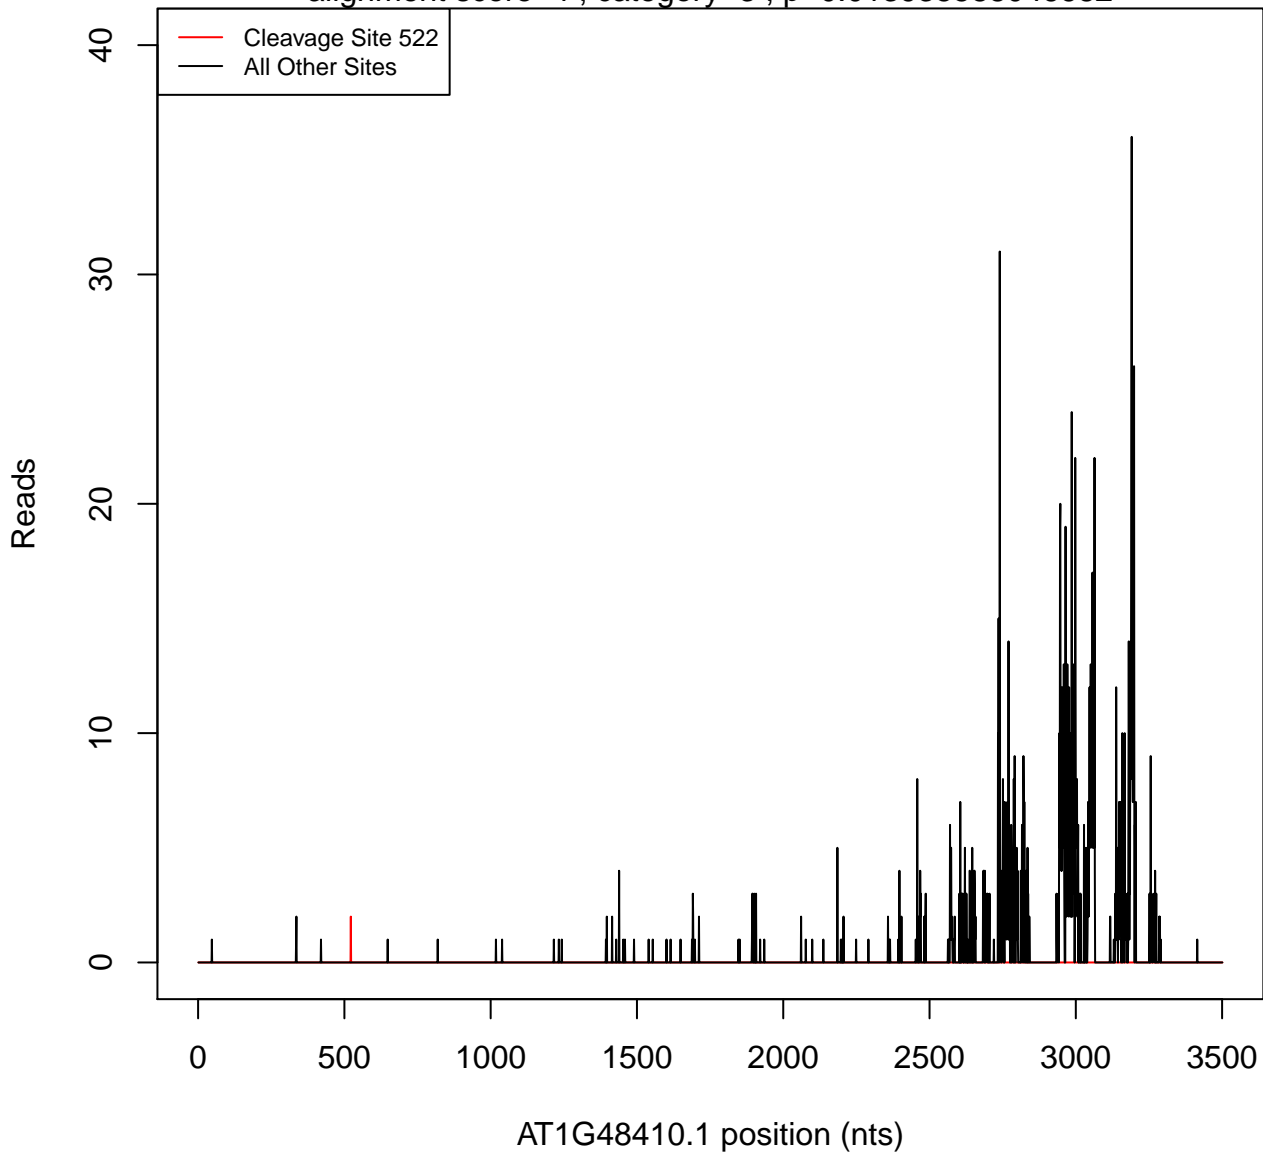

# ath-miR168a slicing AT1G48410.2 at nt 522

alignment score=4 , category=3 , p=0.013935588046682

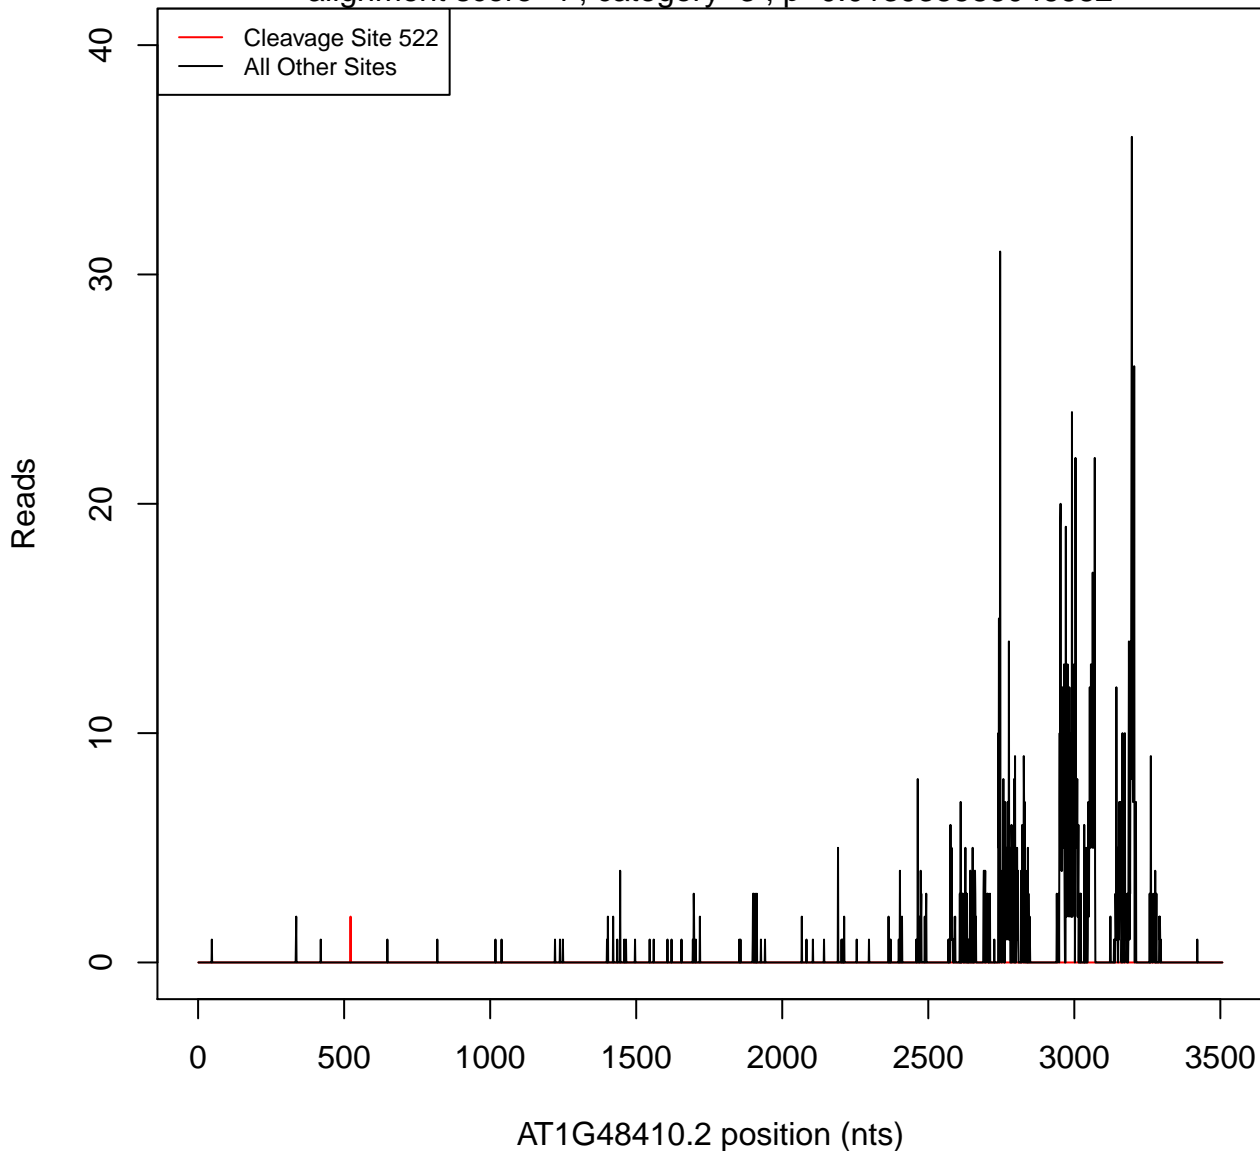

# ath-miR168b slicing AT1G48410.2 at nt 522

alignment score=4 , category=3 , p=0.013935588046682



# ath-miR168a slicing AT1G48410.3 at nt 532

alignment score=4 , category=3 , p=0.013935588046682

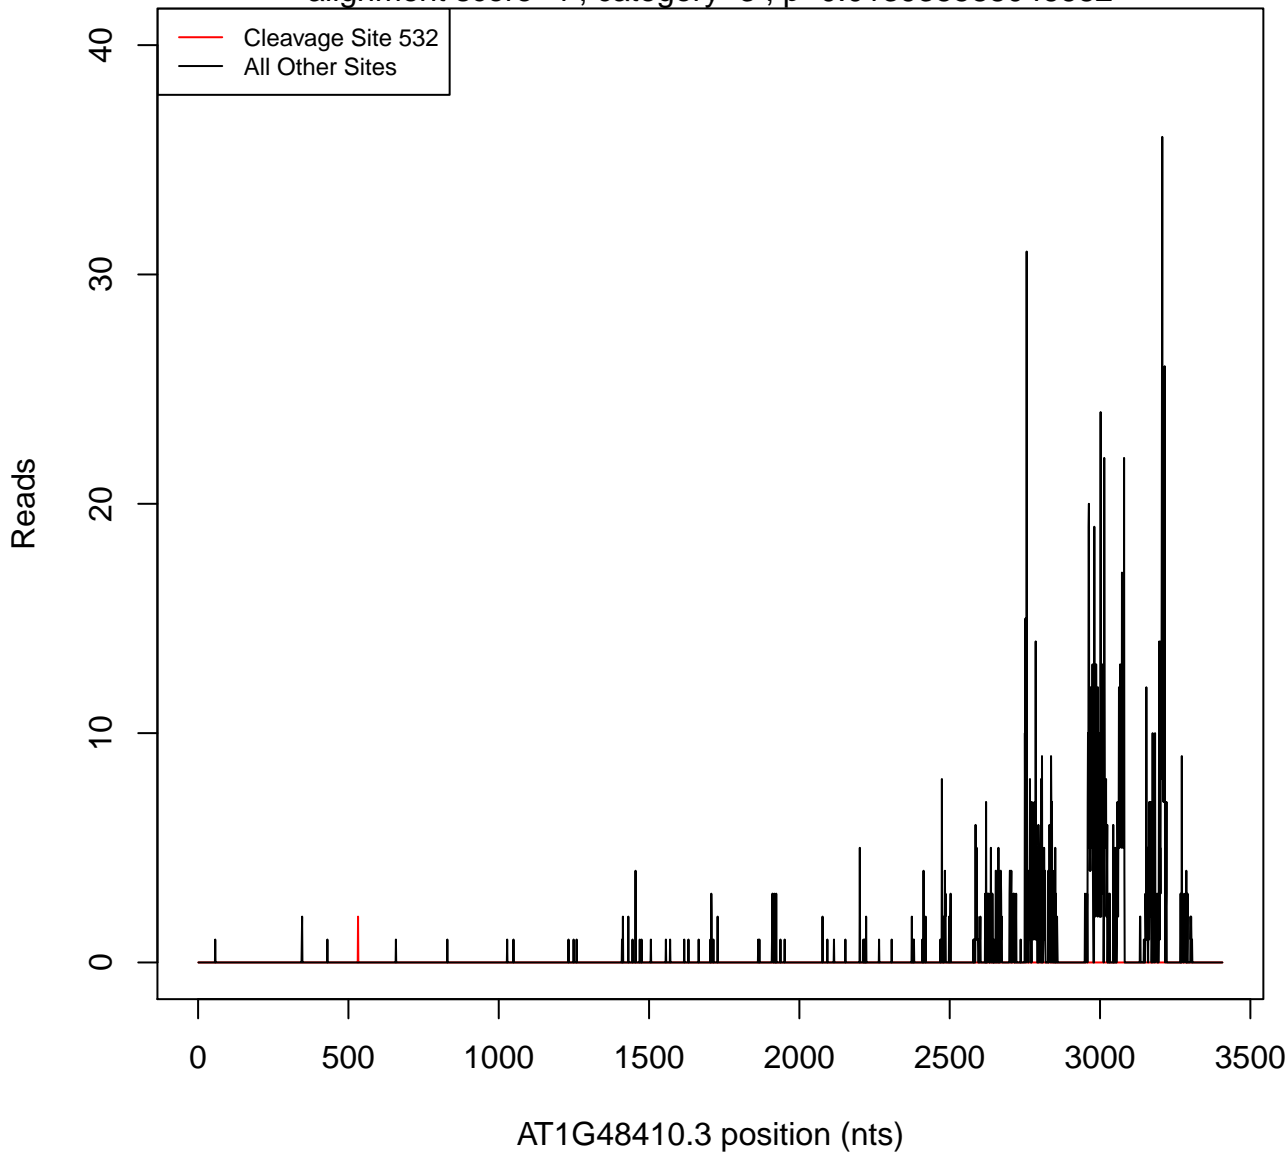

# ath-miR168b slicing AT1G48410.3 at nt 532

alignment score=4 , category=3 , p=0.013935588046682

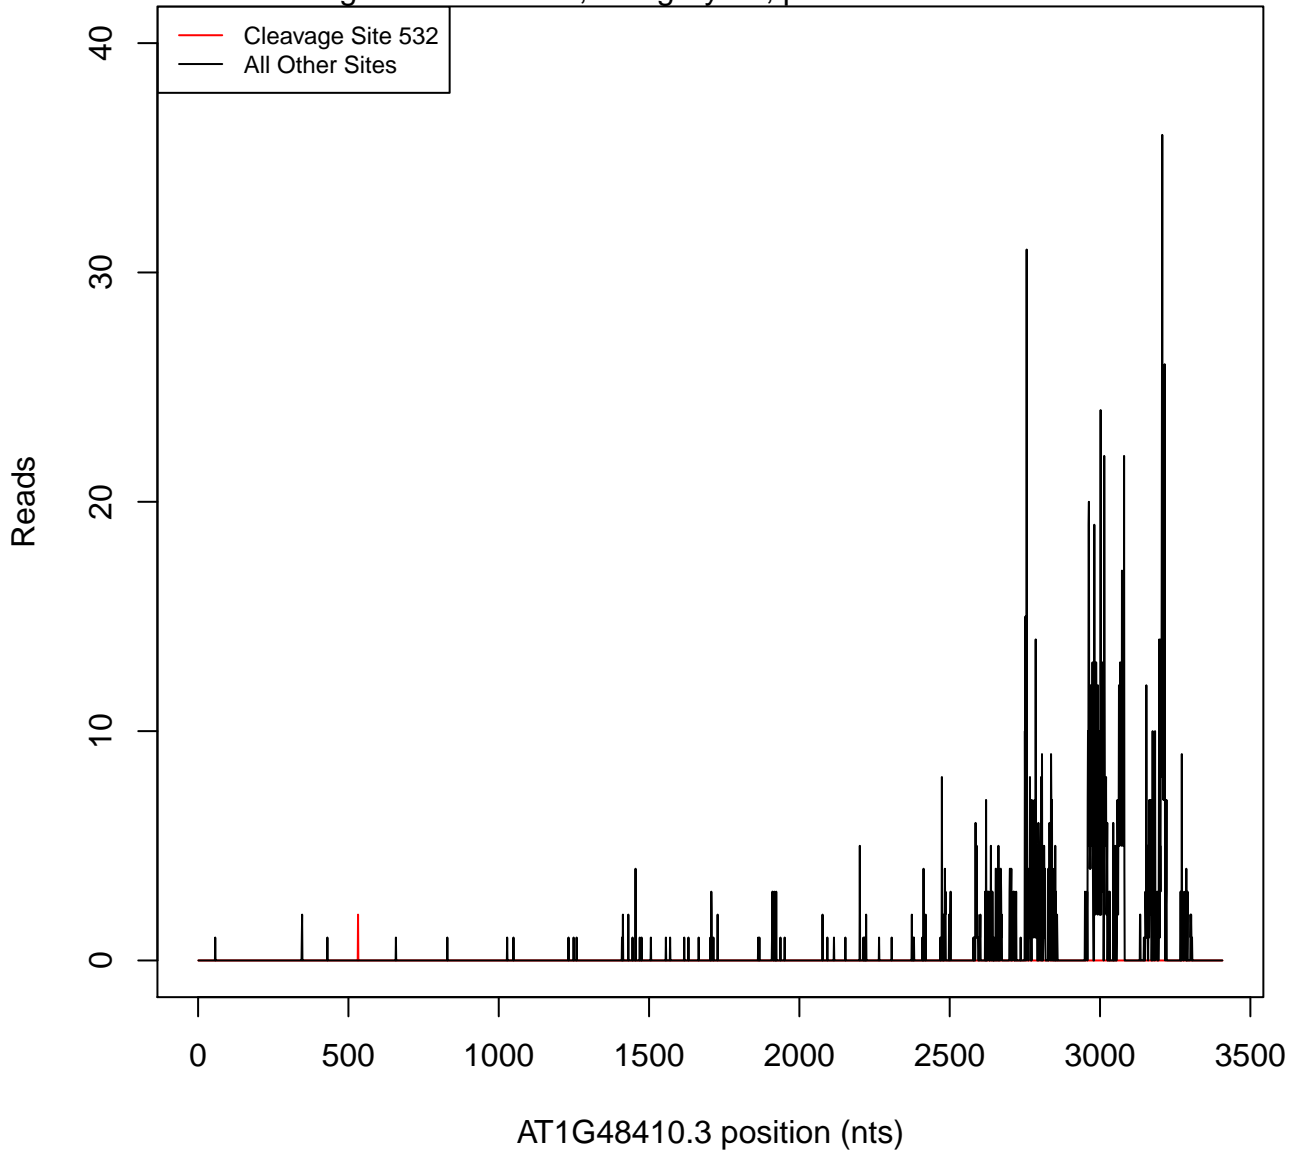

# ath-miR165a slicing AT1G52150.1 at nt 1279

alignment score=3.5 , category=2 , p=0.0826630452846873

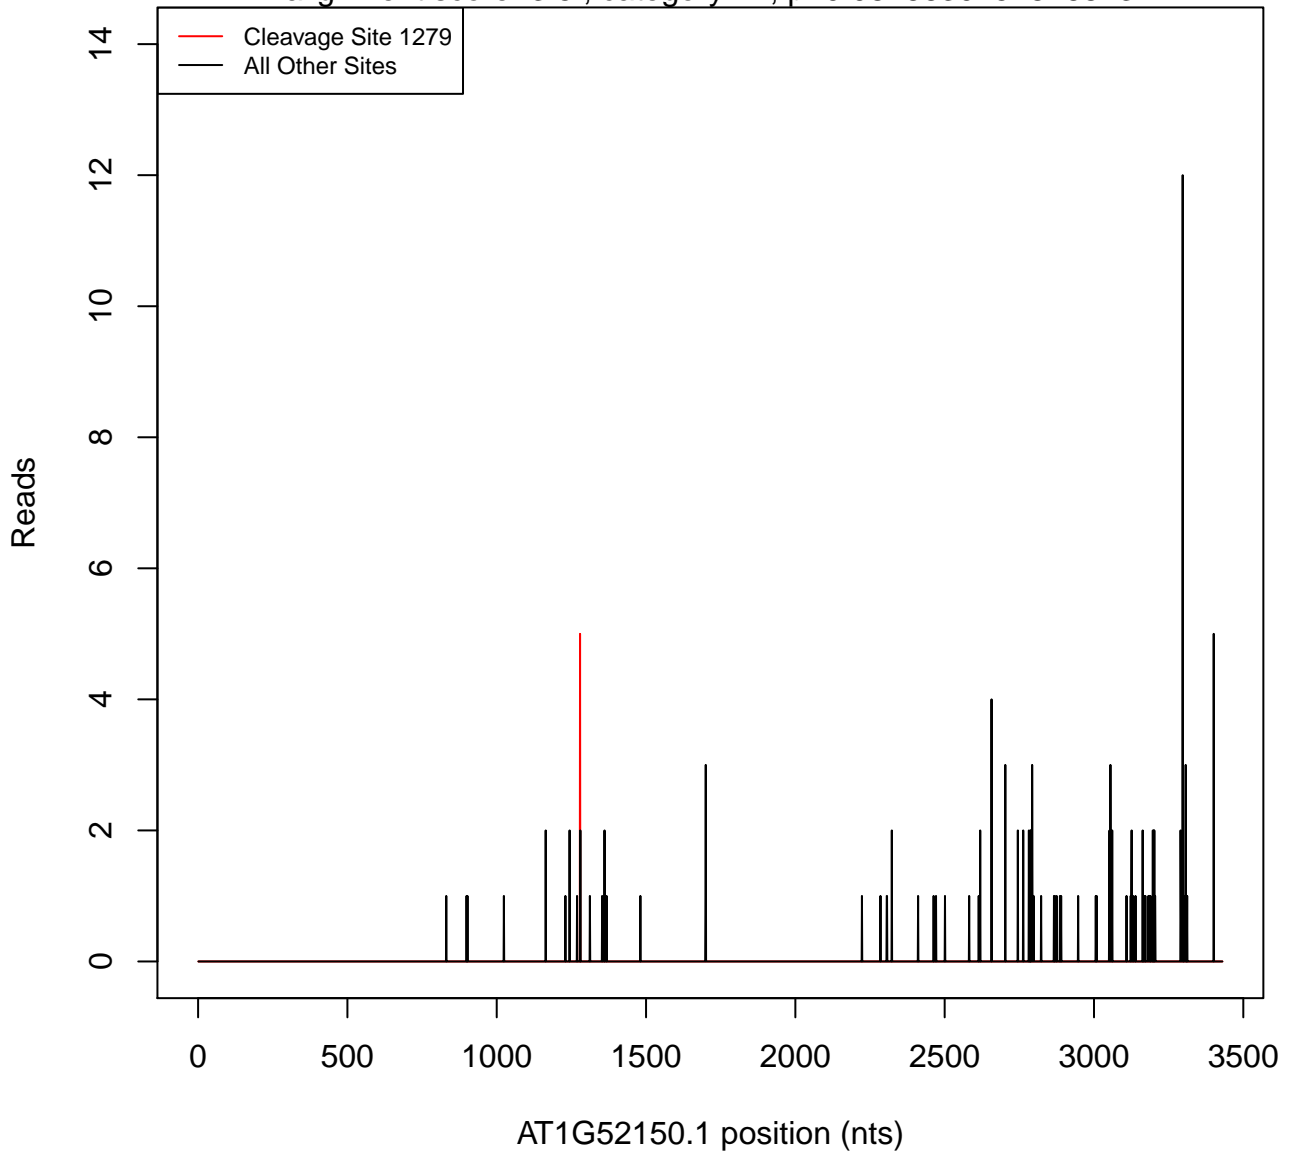

# ath-miR165b slicing AT1G52150.1 at nt 1279

alignment score=3.5 , category=2 , p=0.0826630452846873

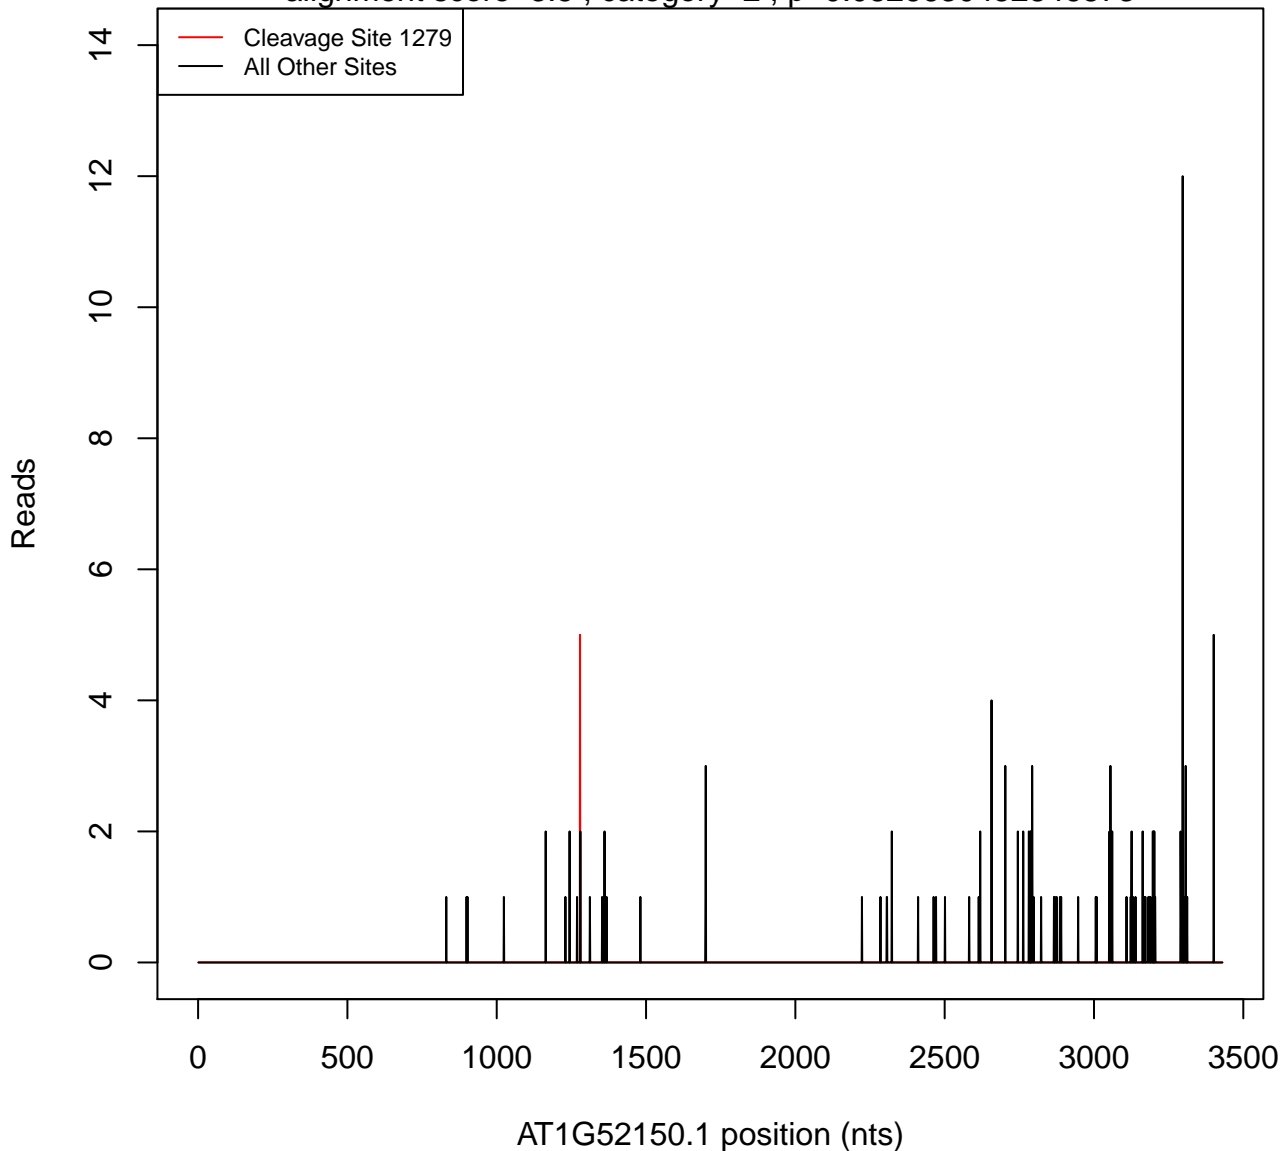



# ath-miR165a slicing AT1G52150.2 at nt 1279

alignment score=3.5 , category=2 , p=0.0826630452846873

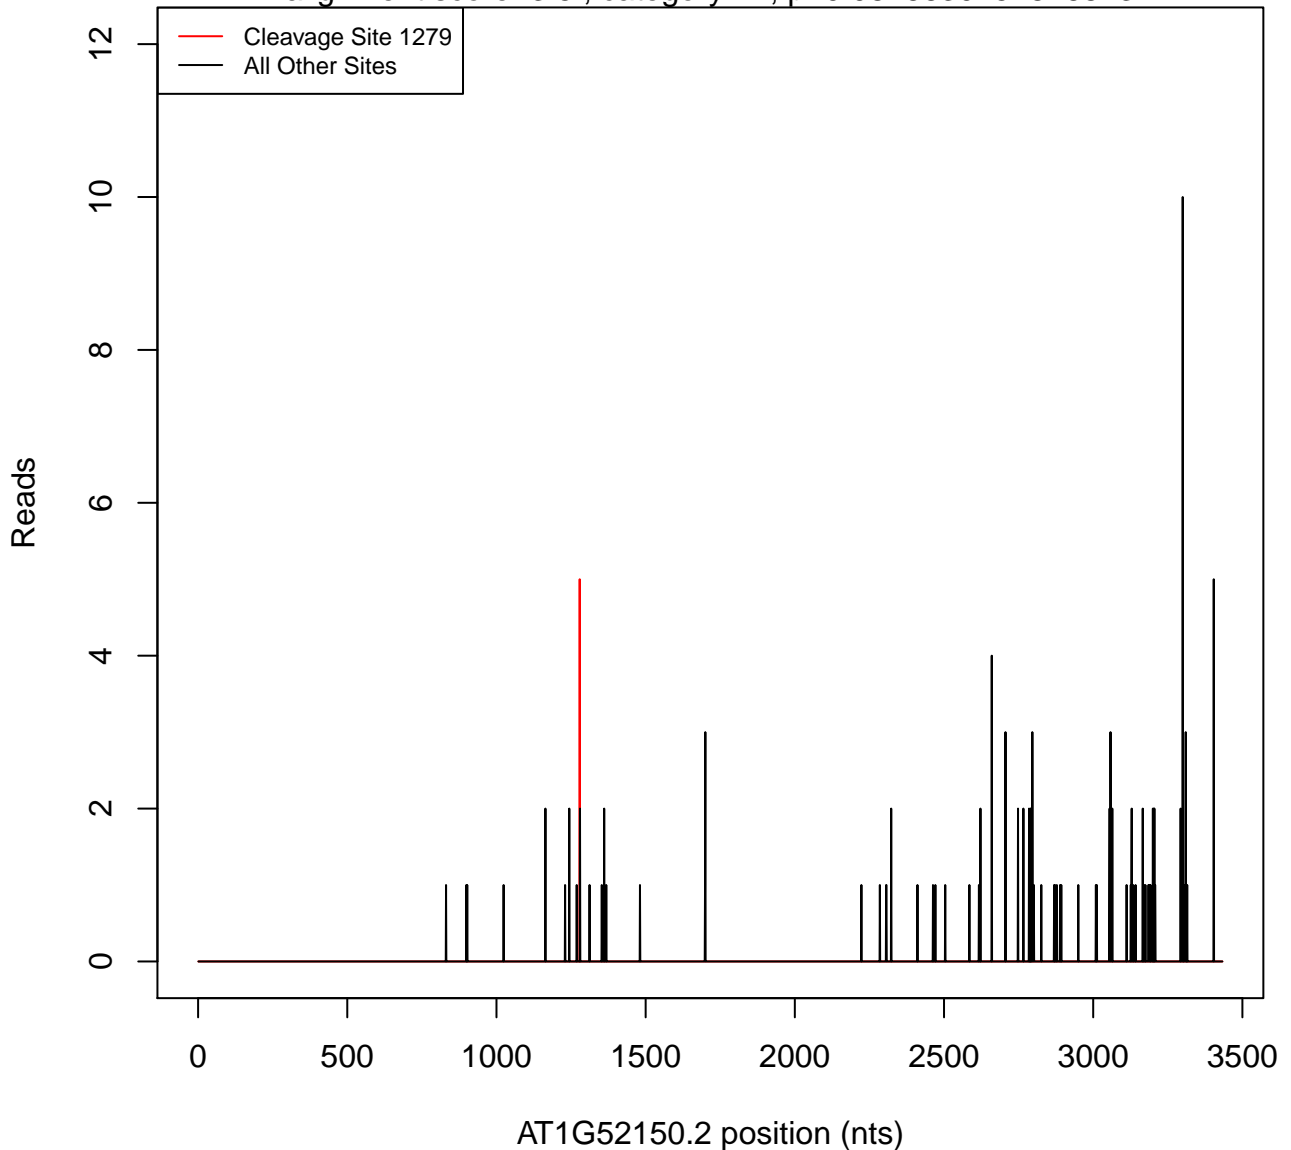

# ath-miR165b slicing AT1G52150.2 at nt 1279

alignment score=3.5 , category=2 , p=0.0826630452846873

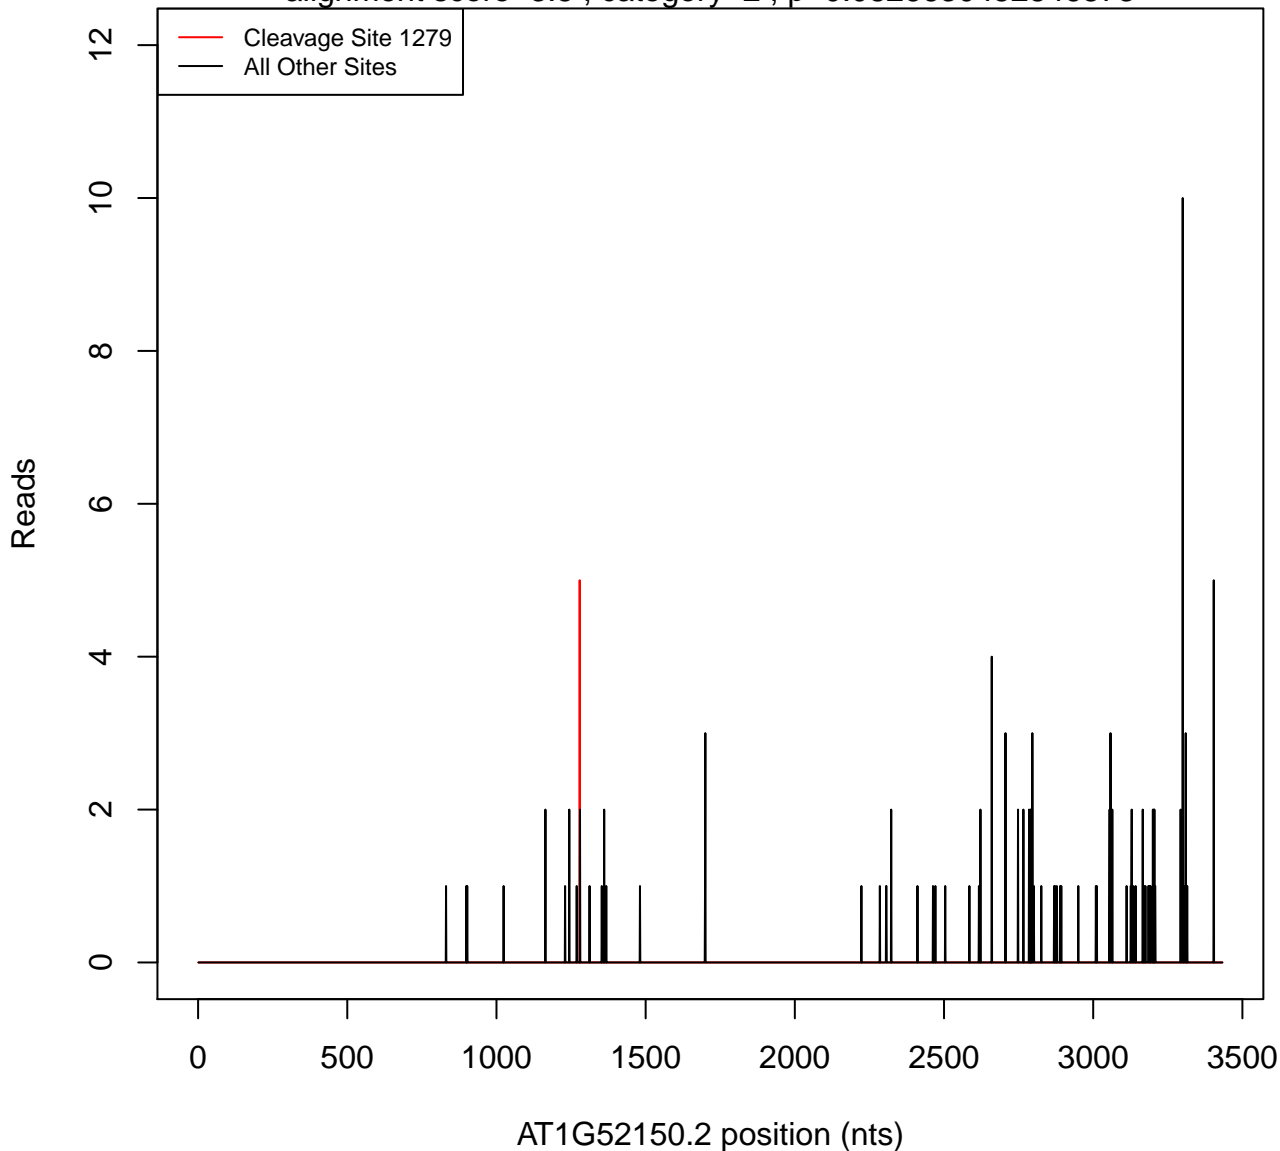

# ath-miR165a slicing AT1G52150.3 at nt 1279

alignment score=3.5 , category=2 , p=0.0826630452846873

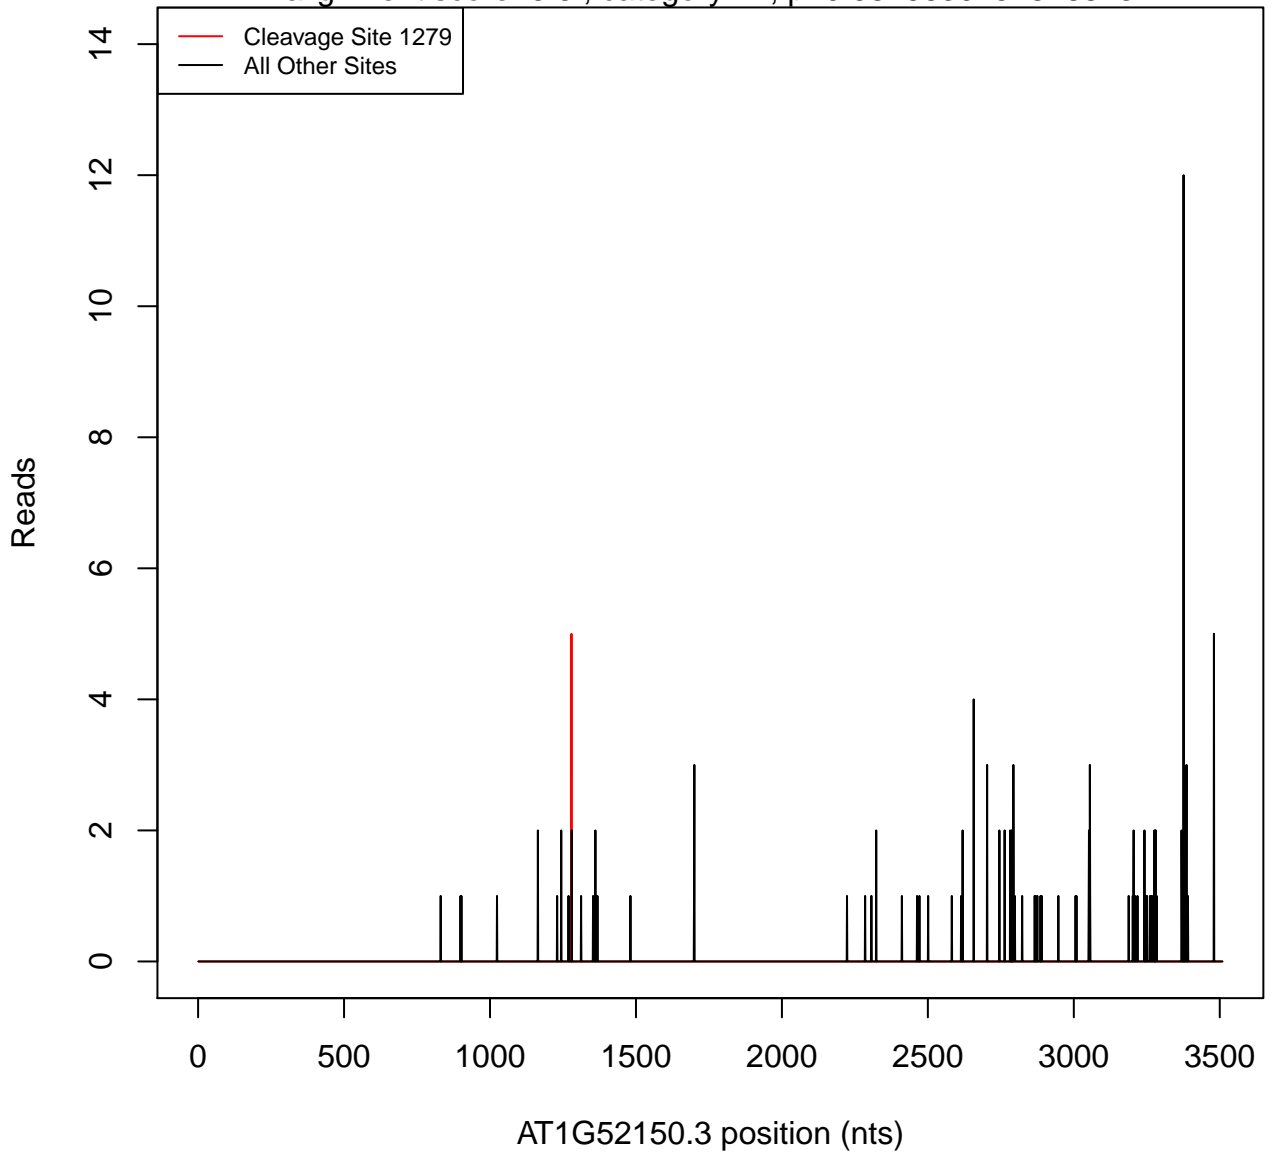

# ath-miR165b slicing AT1G52150.3 at nt 1279

alignment score=3.5 , category=2 , p=0.0826630452846873

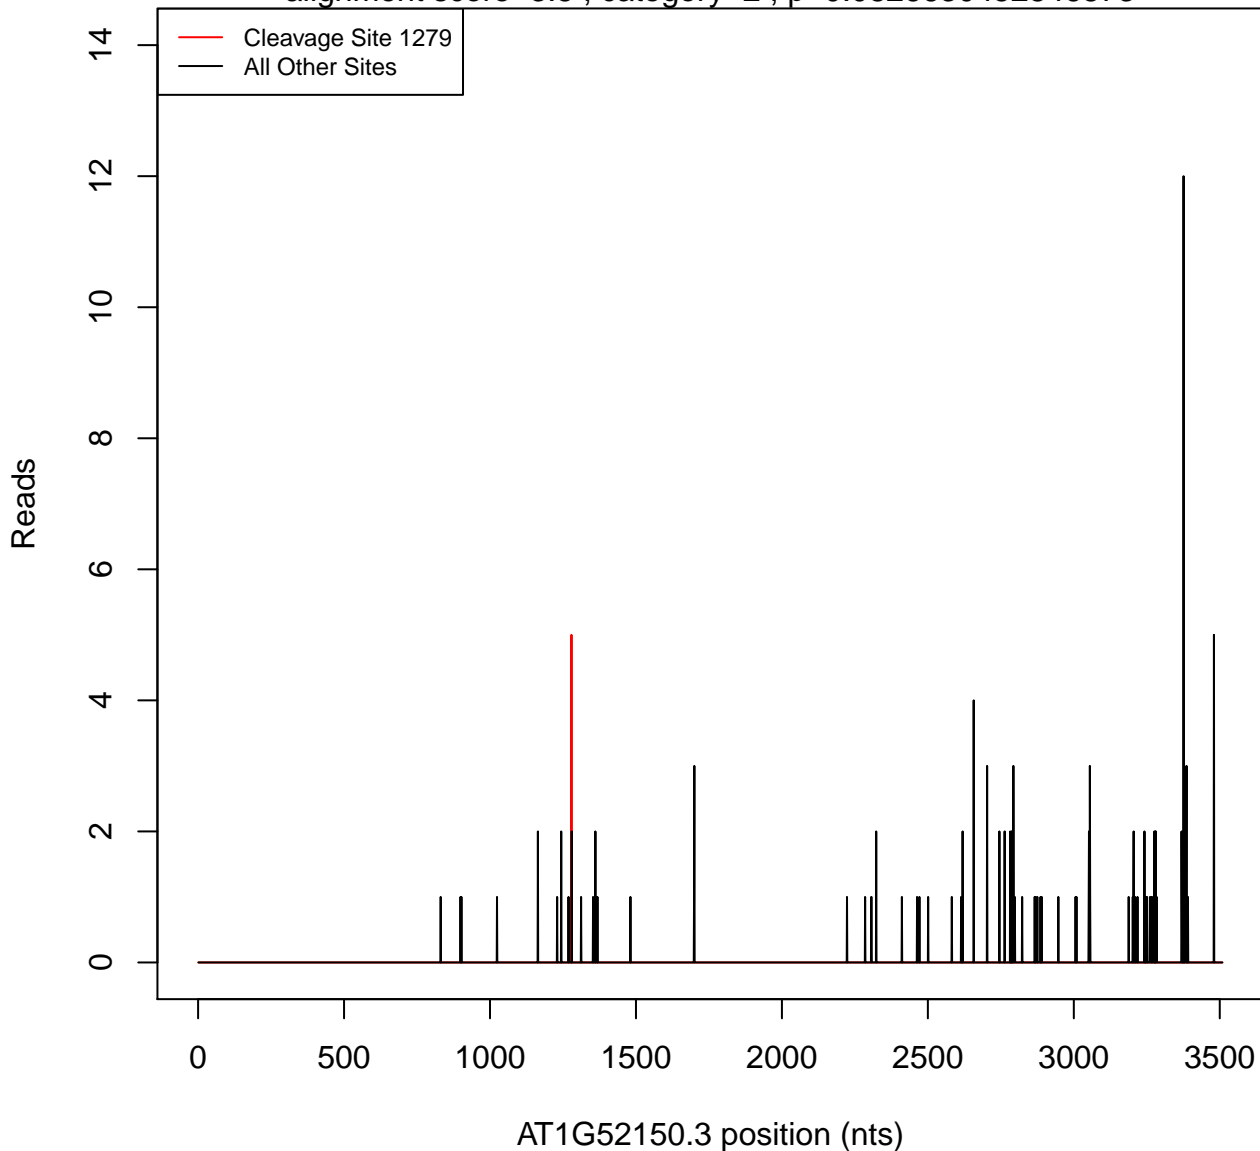

# ath-miR156a slicing AT1G53160.1 at nt 602

alignment score=2 , category=0 , p=0.00232298286129295

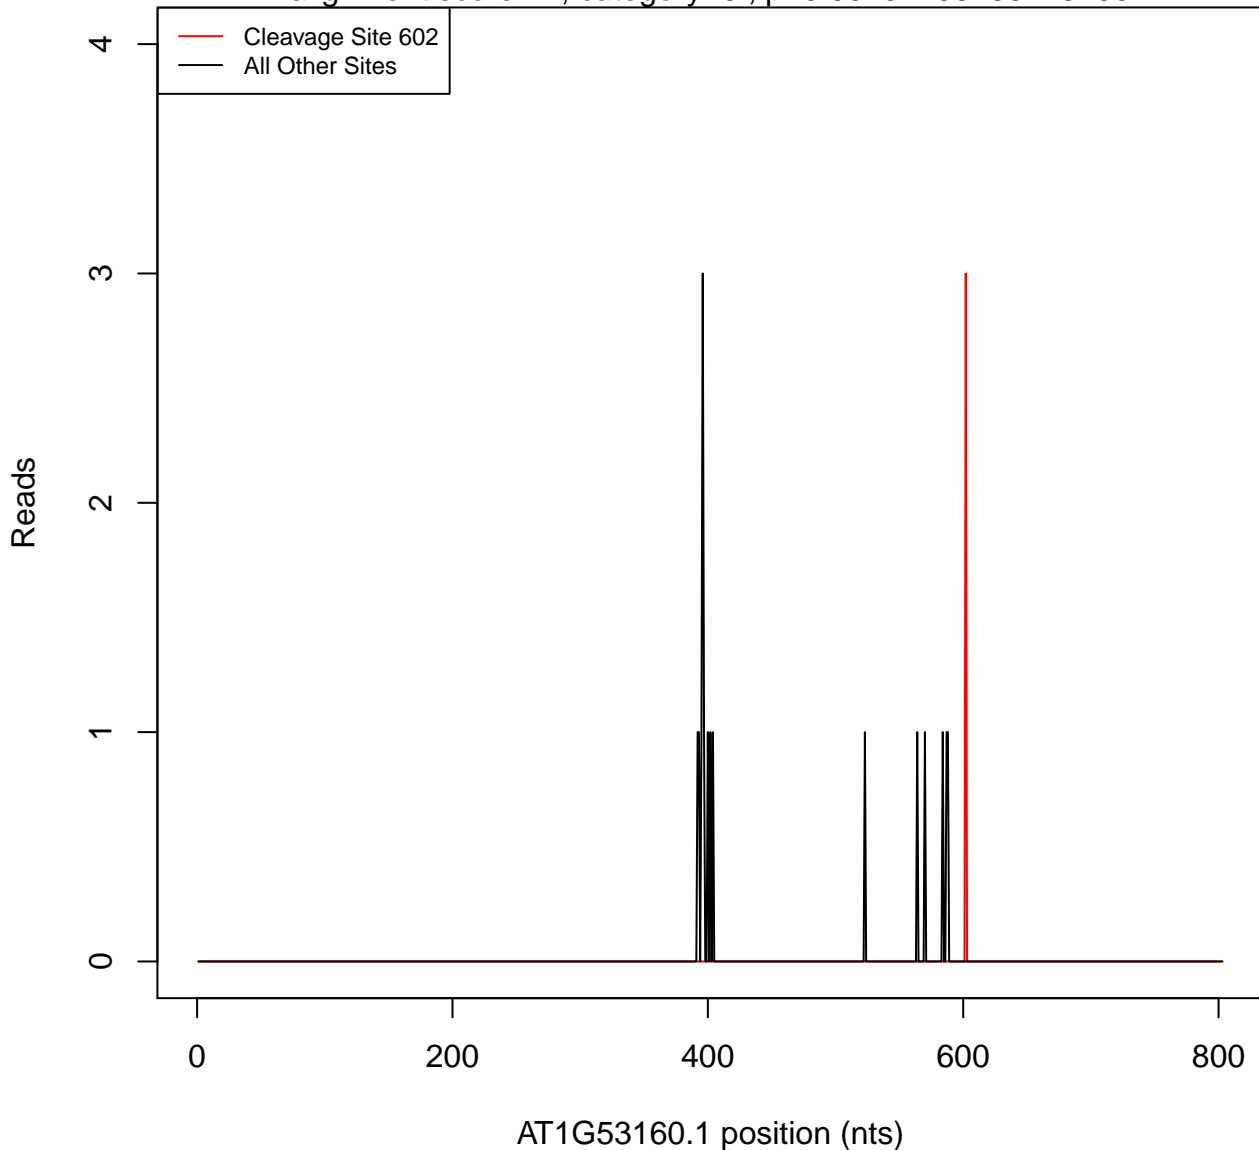

# ath-miR156b slicing AT1G53160.1 at nt 602

alignment score=2 , category=0 , p=0.00232298286129295

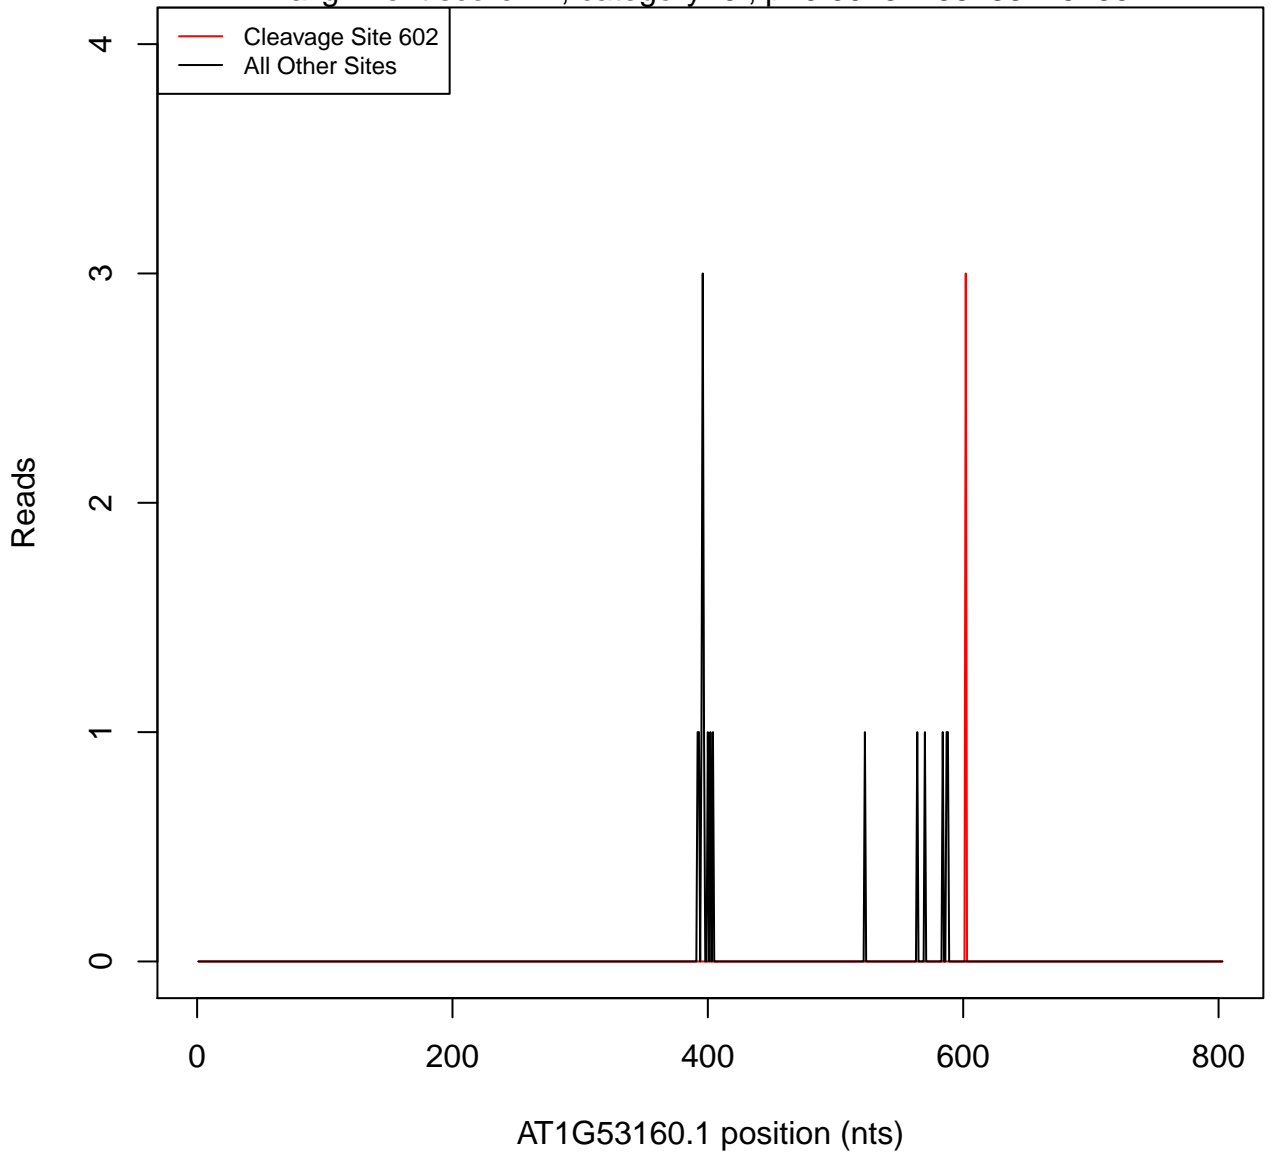

# ath-miR156c slicing AT1G53160.1 at nt 602

alignment score=2 , category=0 , p=0.00232298286129295

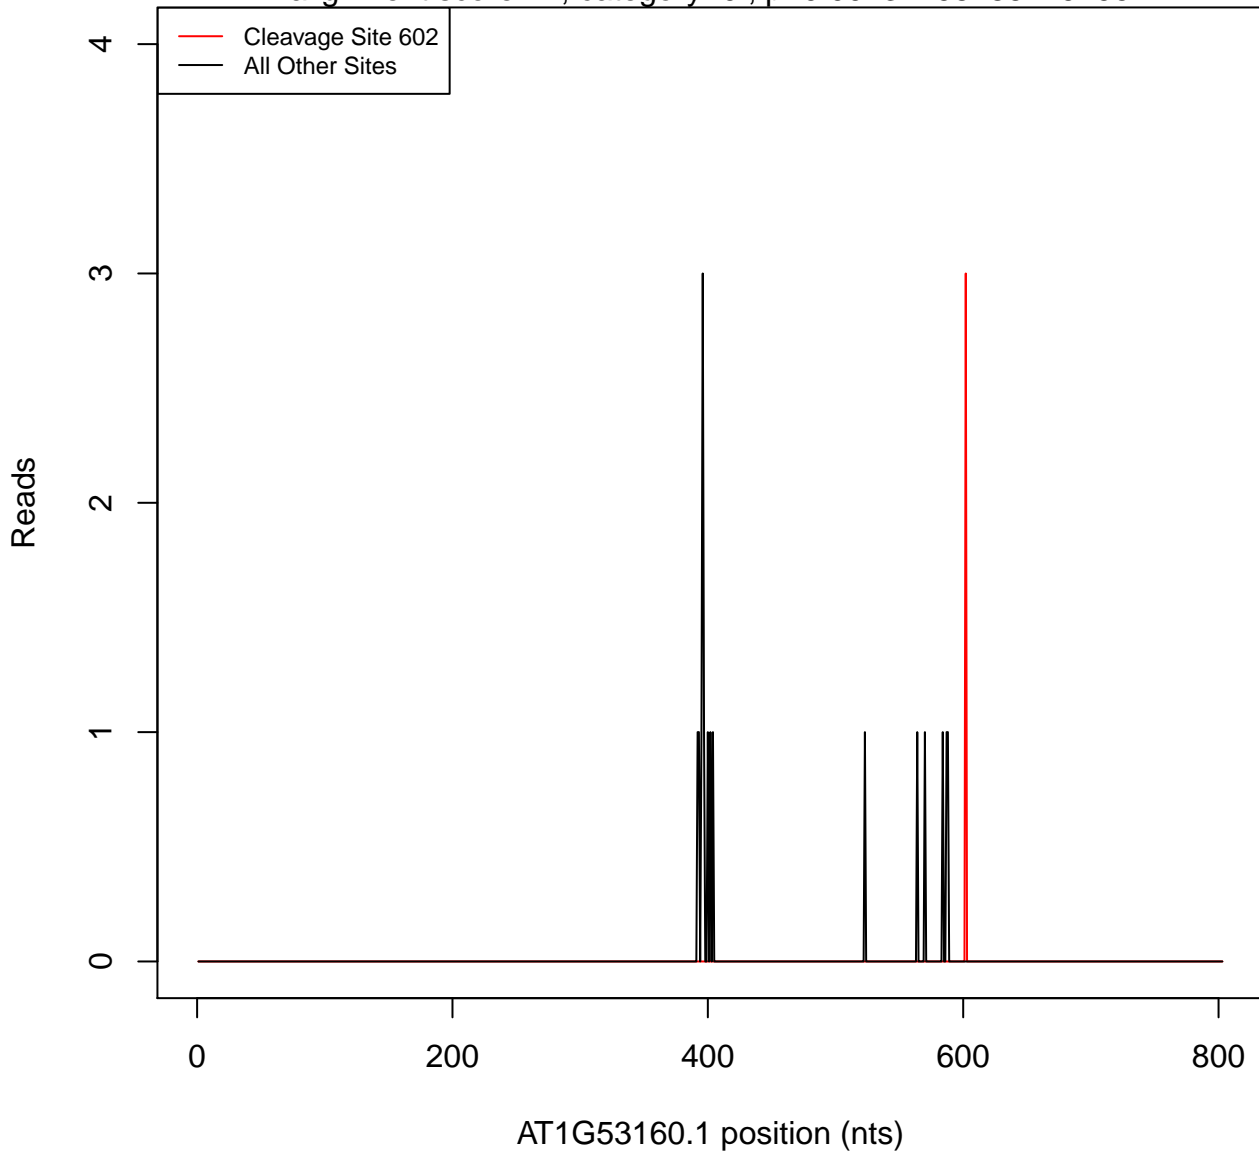

# ath-miR156d slicing AT1G53160.1 at nt 602

alignment score=2 , category=0 , p=0.00232298286129295





# ath-miR156e slicing AT1G53160.1 at nt 602

alignment score=2 , category=0 , p=0.00232298286129295

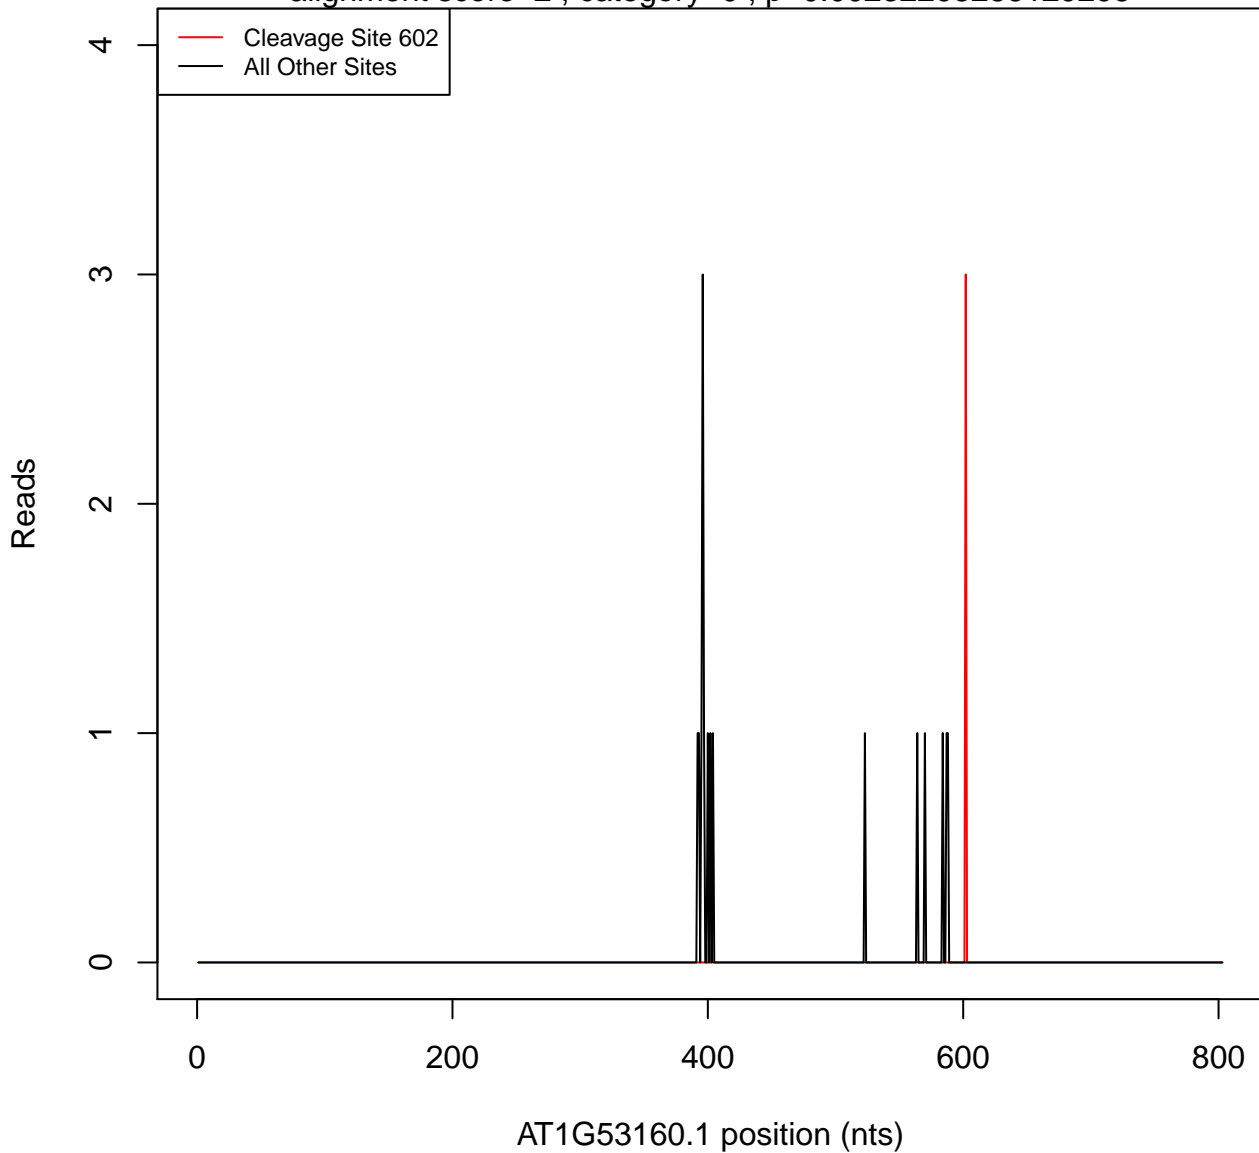

# ath-miR156f slicing AT1G53160.1 at nt 602

alignment score=2 , category=0 , p=0.00232298286129295



# ath-miR156g slicing AT1G53160.1 at nt 602

alignment score=3 , category=0 , p=0.00190102408274728

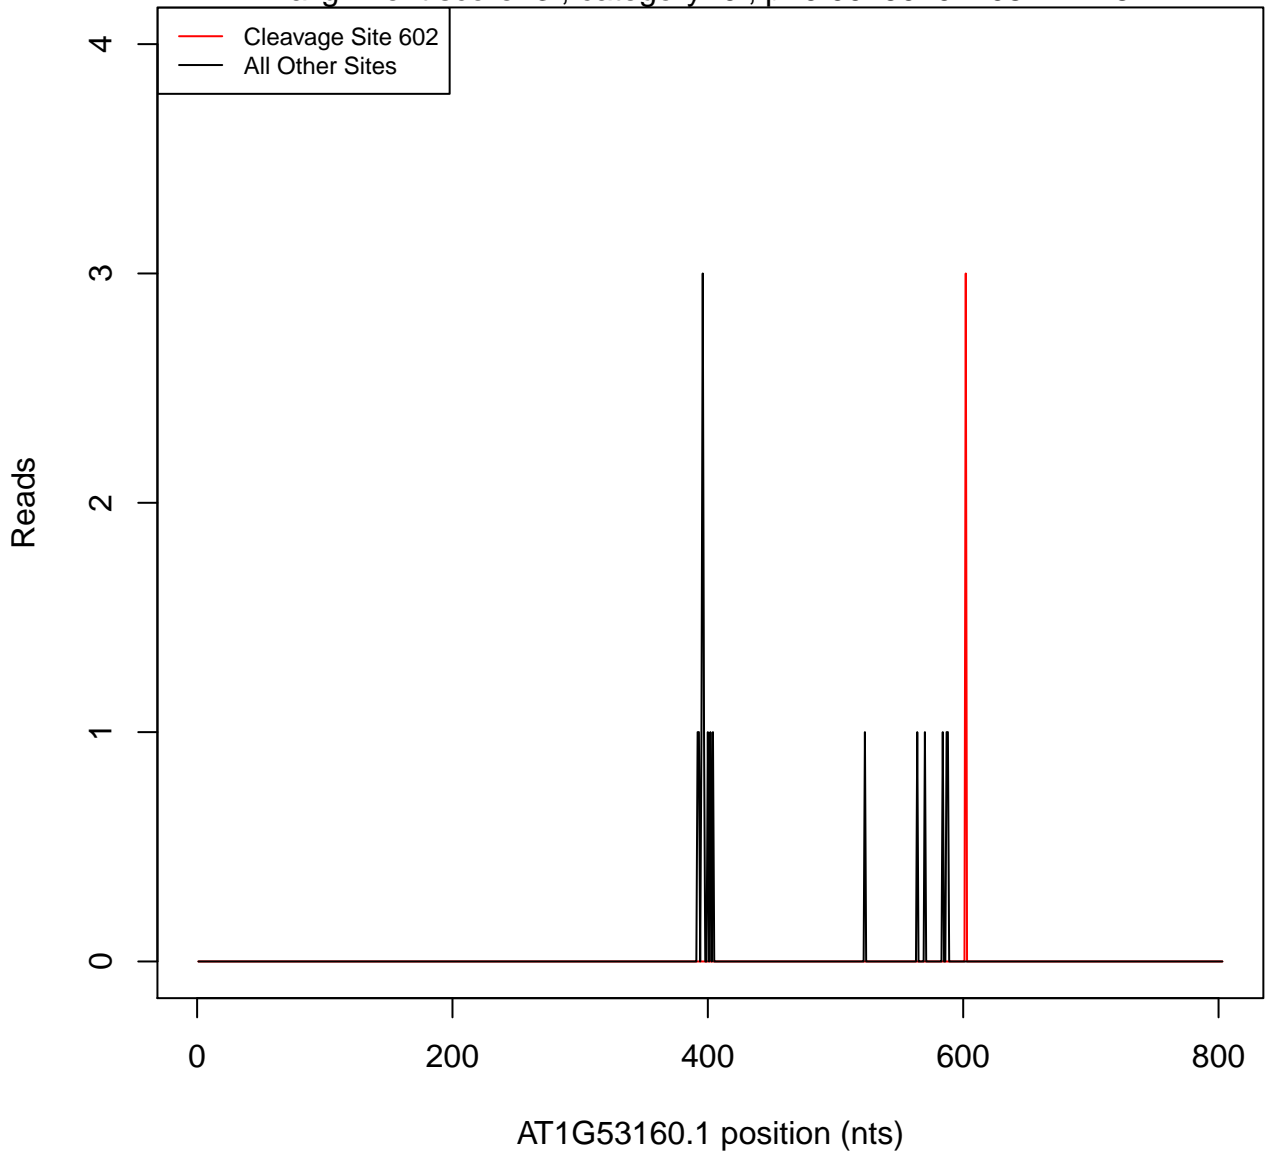

# ath-miR156h slicing AT1G53160.1 at nt 602

alignment score=3 , category=0 , p=0.0151073874828038

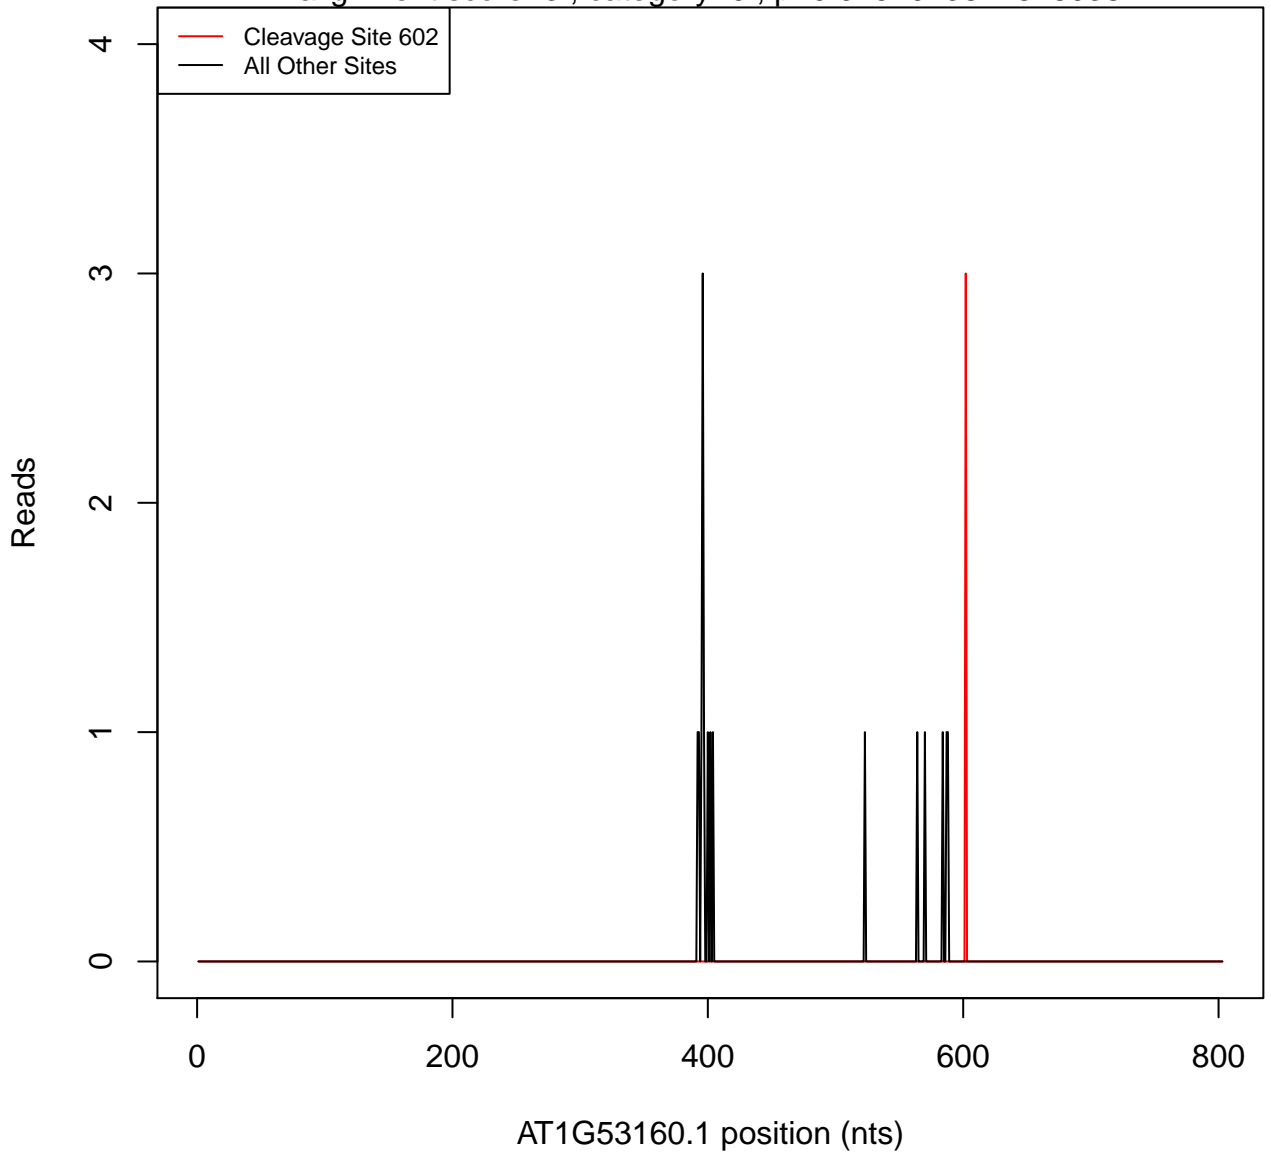

# ath-miR156i slicing AT1G53160.1 at nt 602

alignment score=0 , category=0 , p=0.00316636532880588

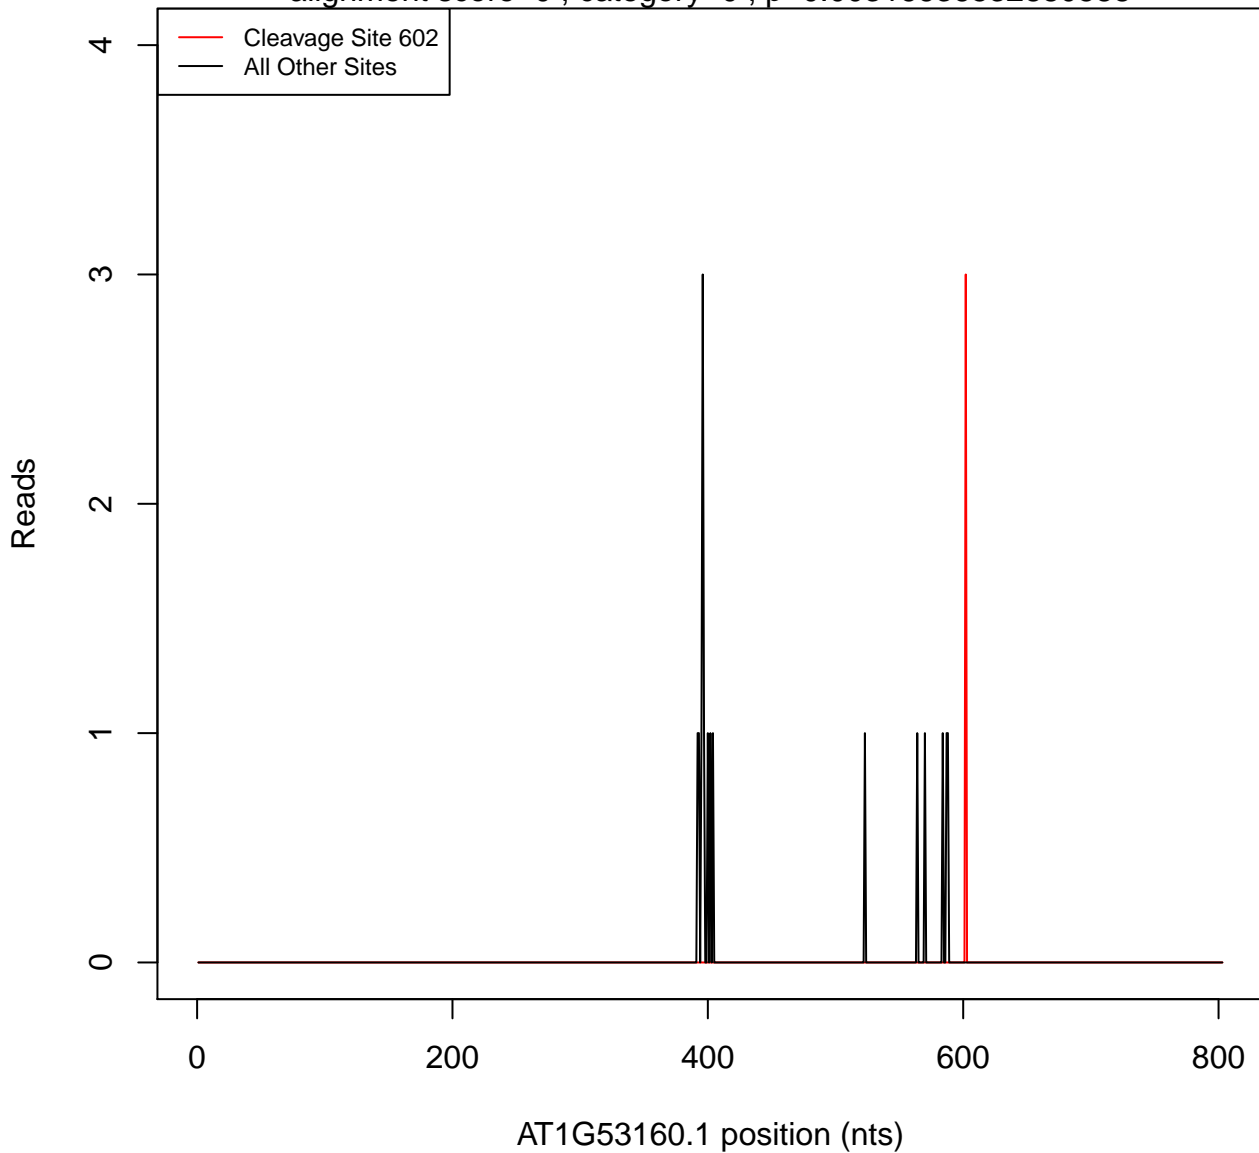

# ath-miR156j slicing AT1G53160.1 at nt 602

alignment score=1 , category=0 , p=0.00274476325150719

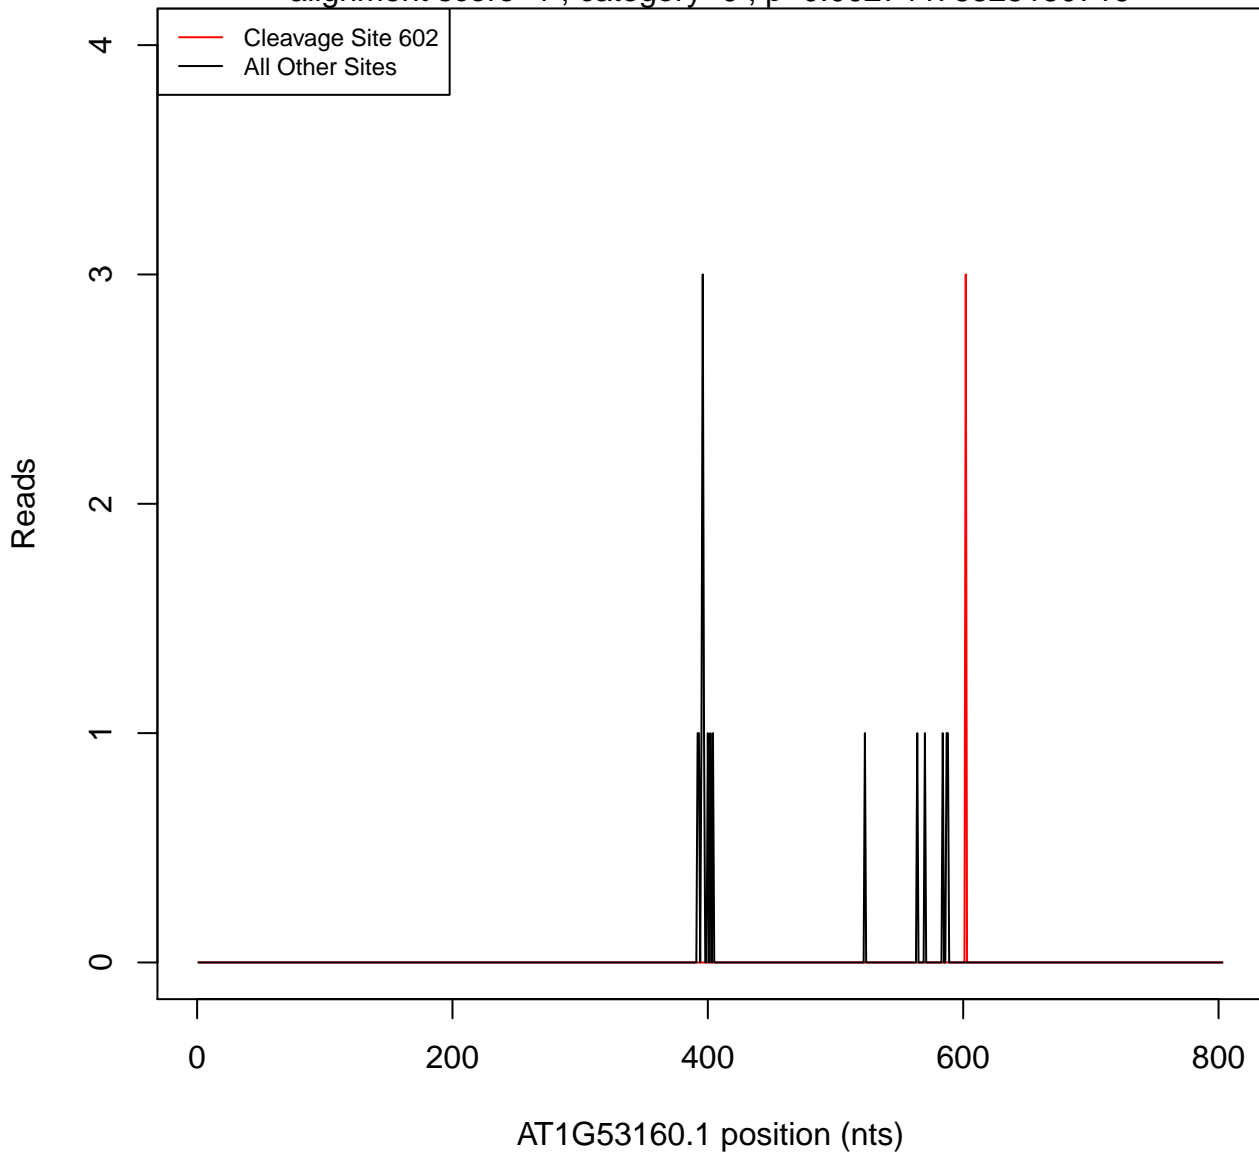

# ath-miR157d slicing AT1G53160.1 at nt 602

alignment score=3 , category=0 , p=0.00758244044293721

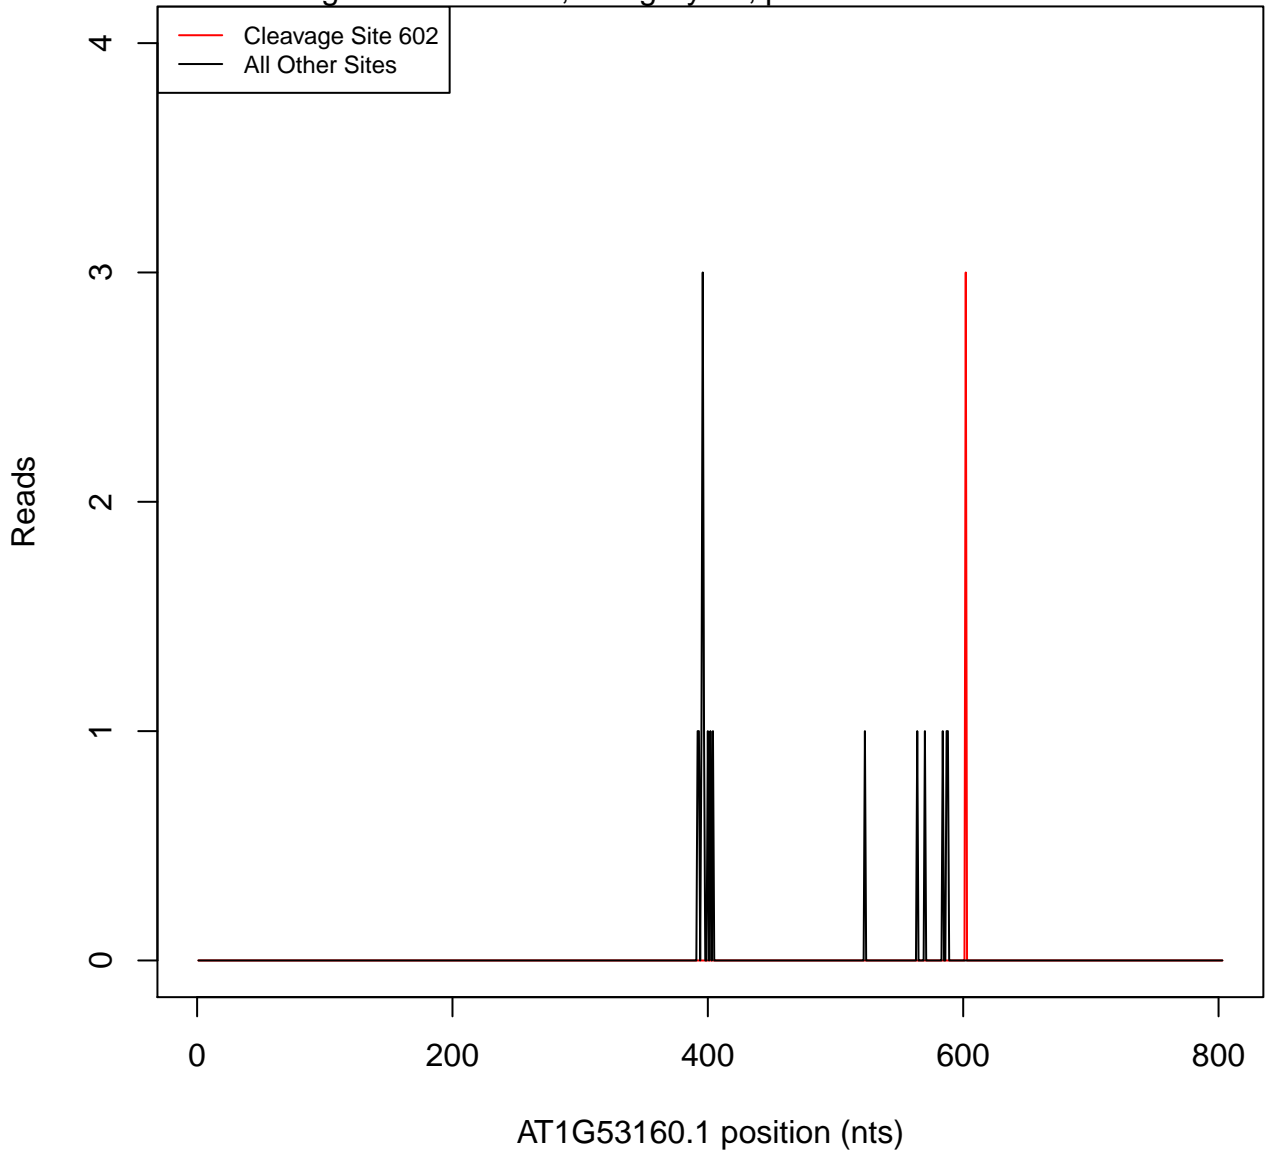

# ath-miR319a slicing AT1G53230.1 at nt 1195

alignment score=4 , category=0 , p=0.0117700365439392

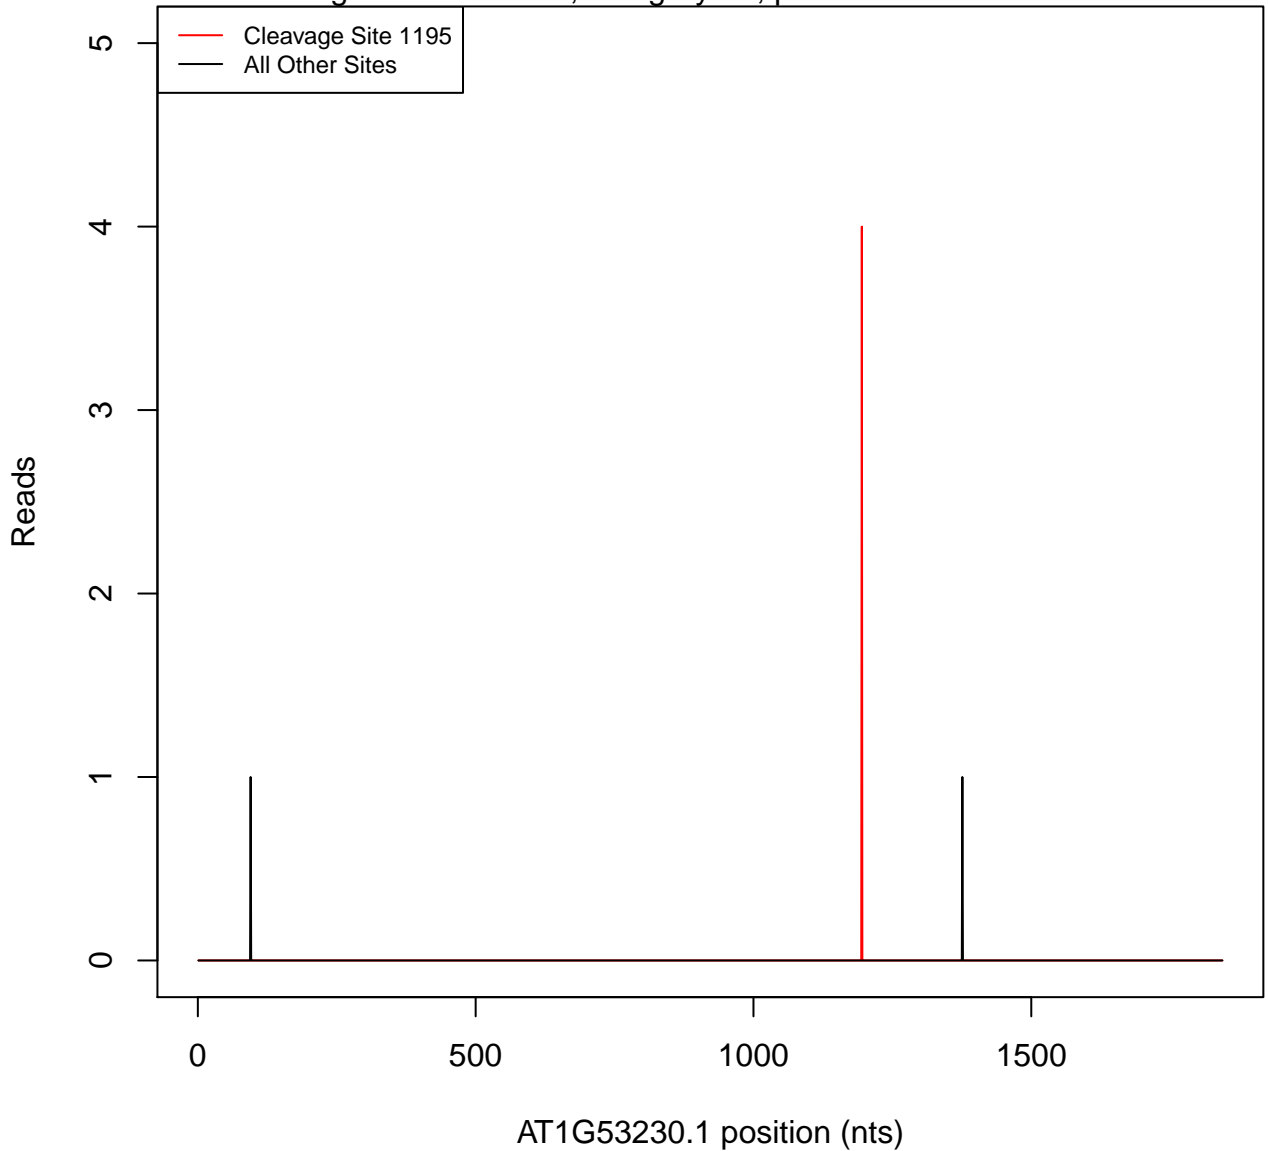



# ath-miR319b slicing AT1G53230.1 at nt 1195

alignment score=4 , category=0 , p=0.0117700365439392

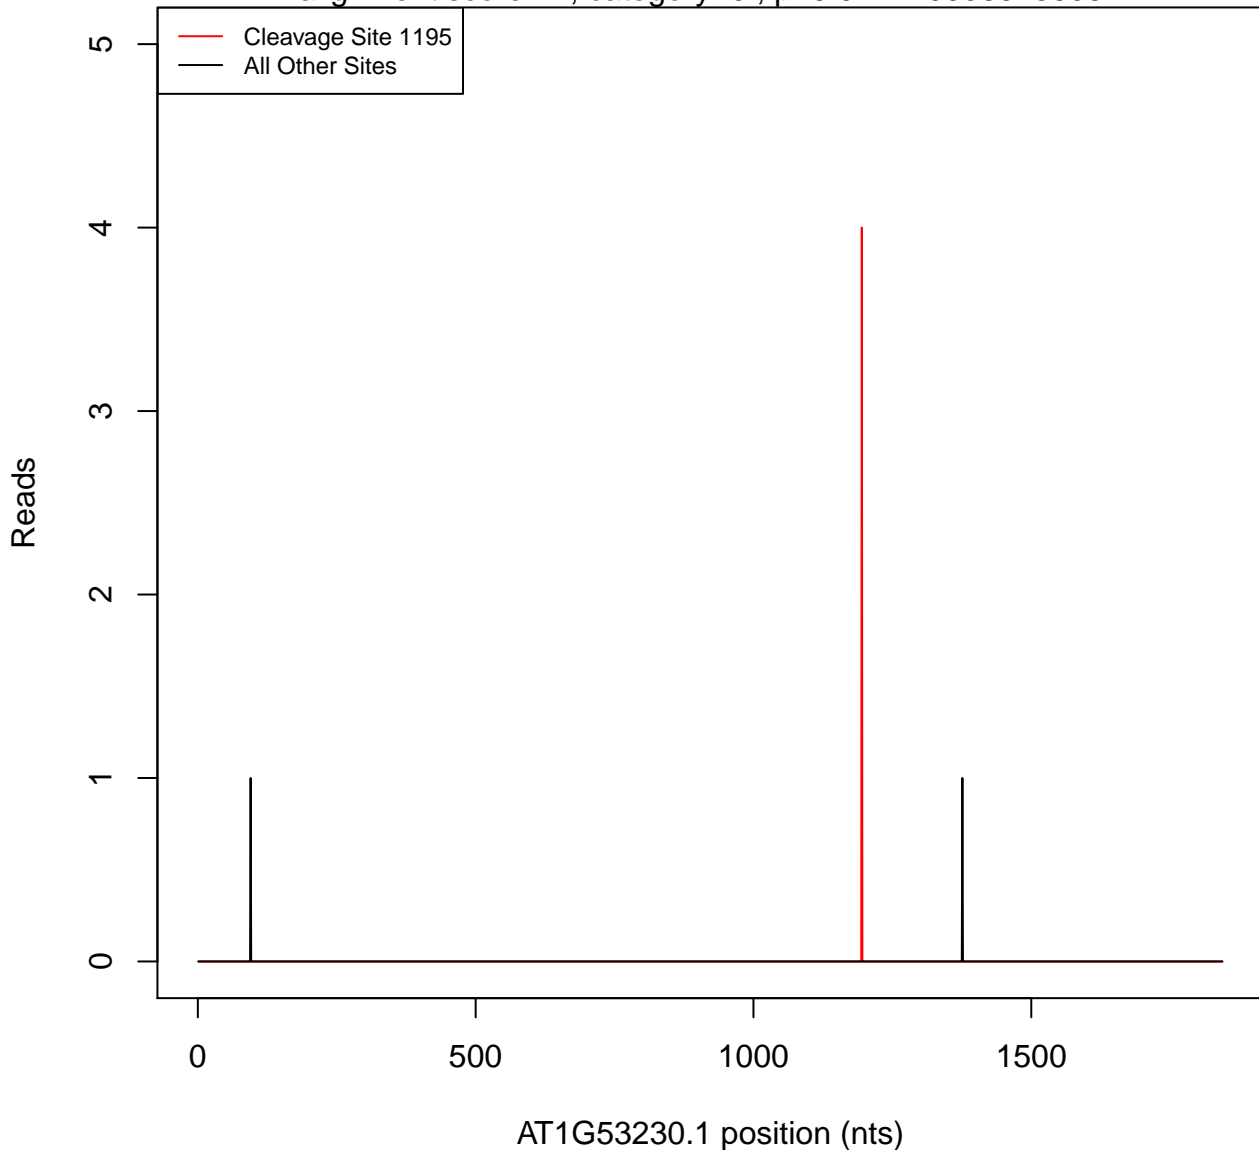

# ath-miR319c slicing AT1G53230.1 at nt 1195

alignment score=3.5 , category=0 , p=0.0100971226825827

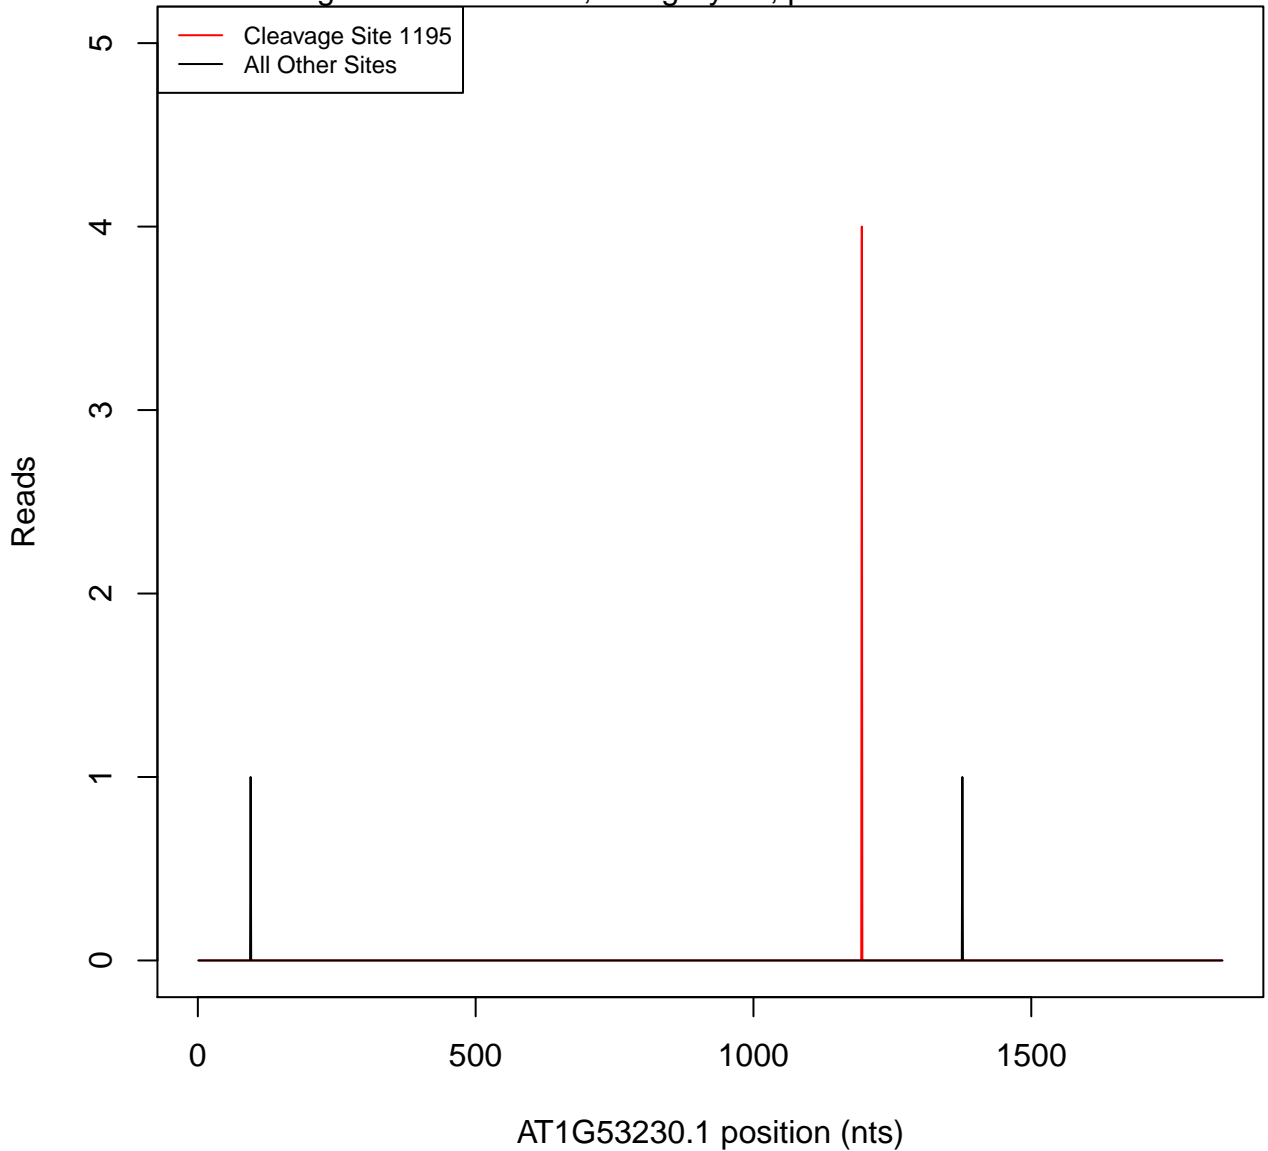

# ptc-miR319i\_R+1\_1ss5GA slicing AT1G53230.1 at nt 1195

alignment score=4 , category=0 , p=0.0103063916905599

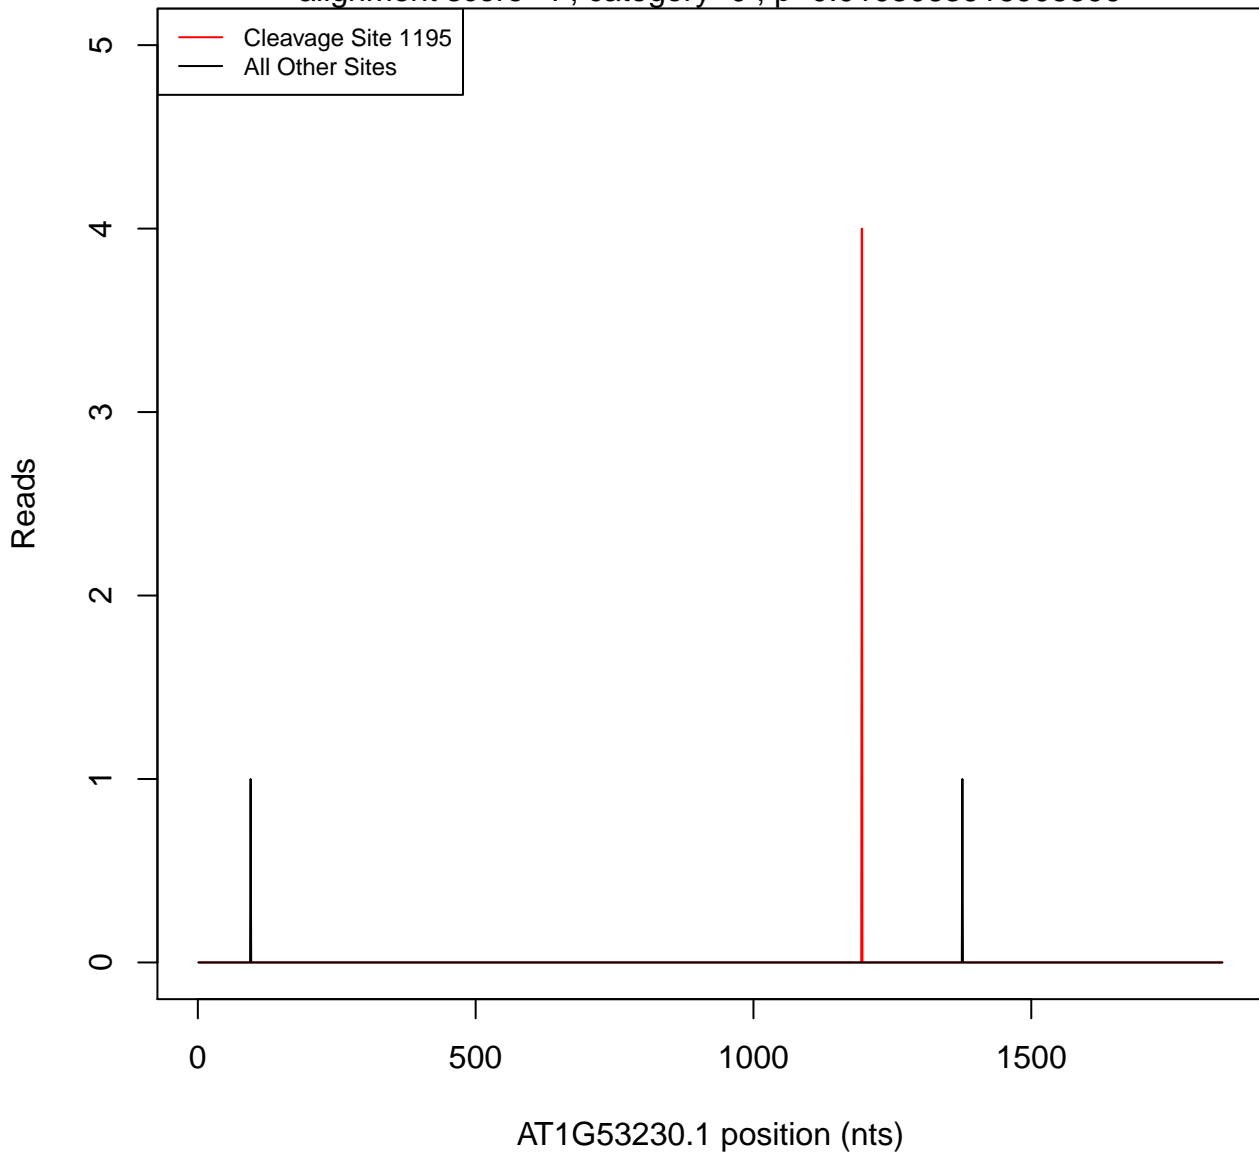

# ath-miR400 slicing AT1G62720.1 at nt 996

alignment score=1 , category=4 , p=0.0719789614737892

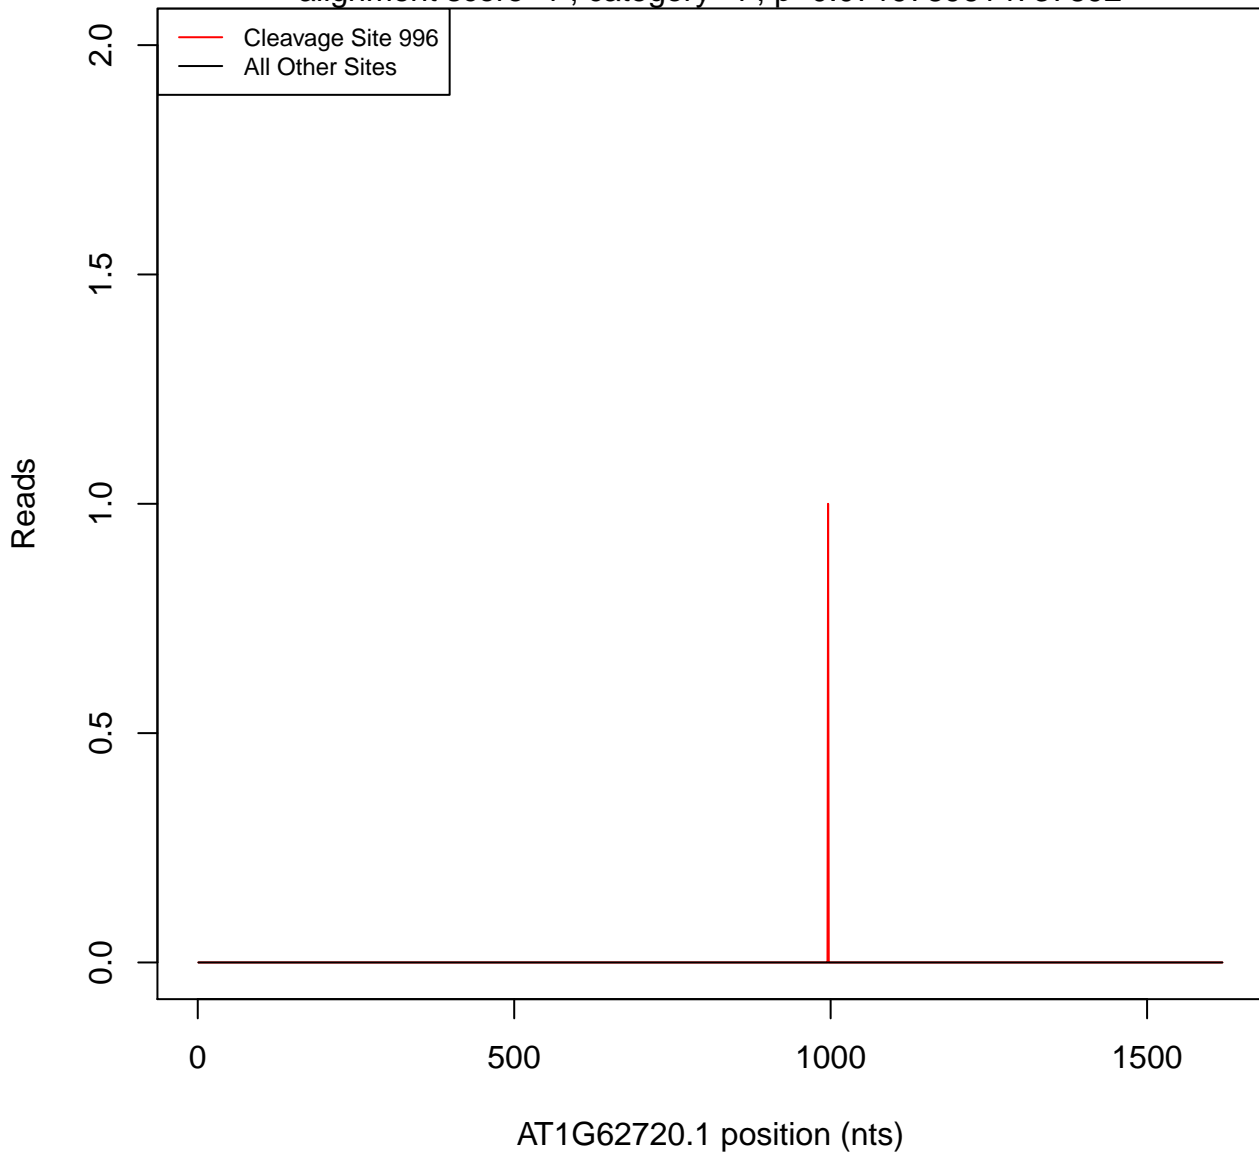

# ath-miR156h\_L+1 slicing AT1G69170.1 at nt 1308

alignment score=2.5 , category=0 , p=0.00211202577527625

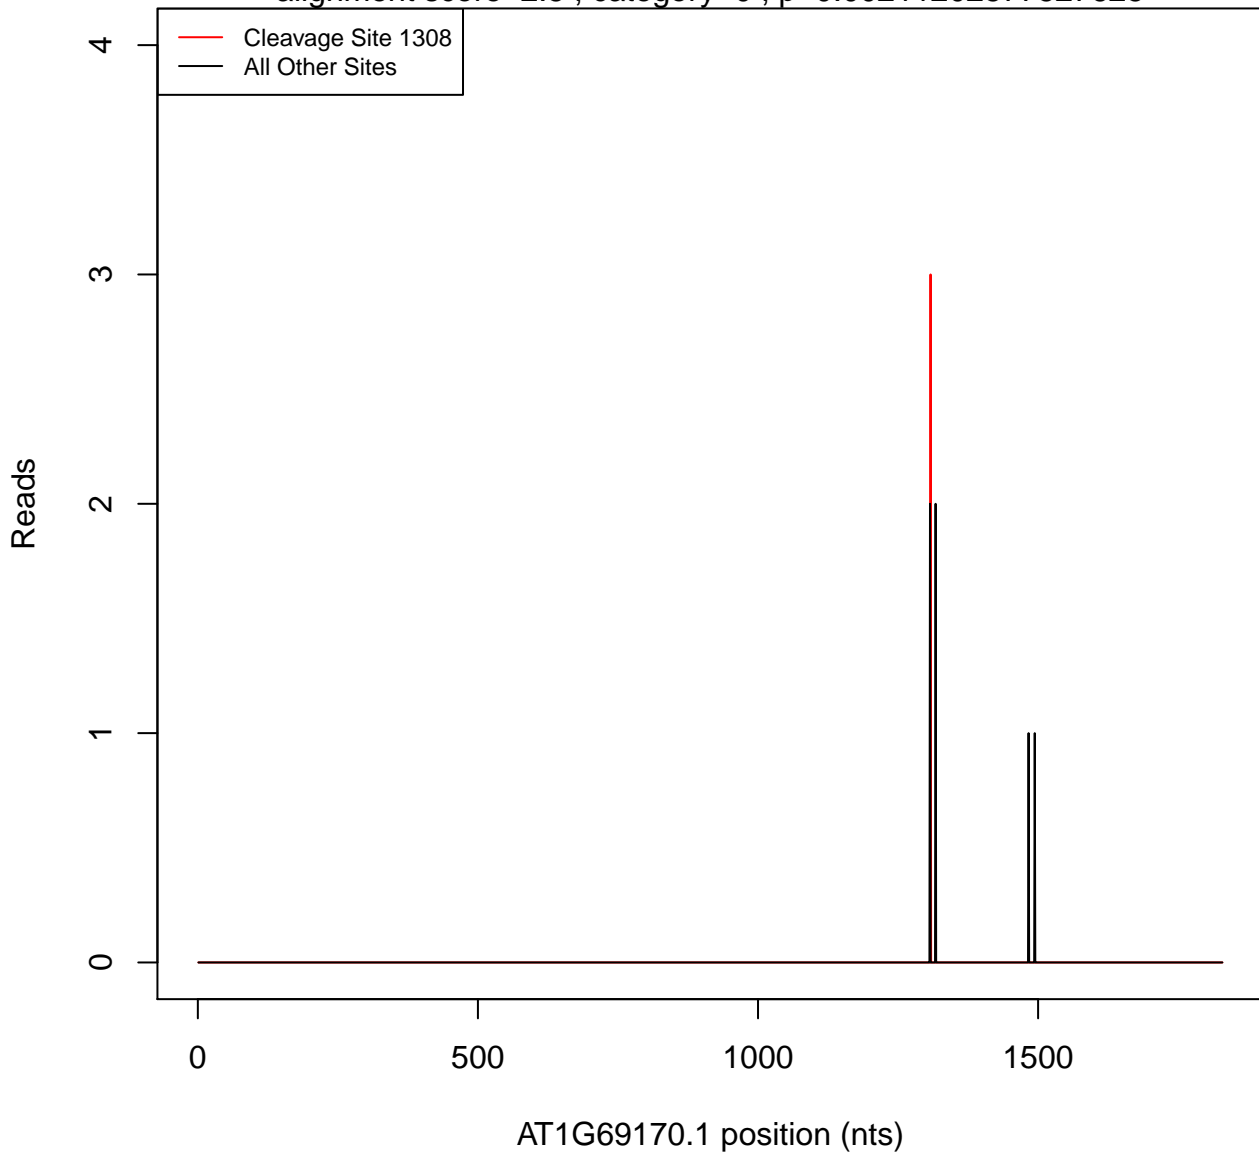

# ath-miR157a slicing AT1G69170.1 at nt 1308

alignment score=2.5 , category=0 , p=0.00421959089767709

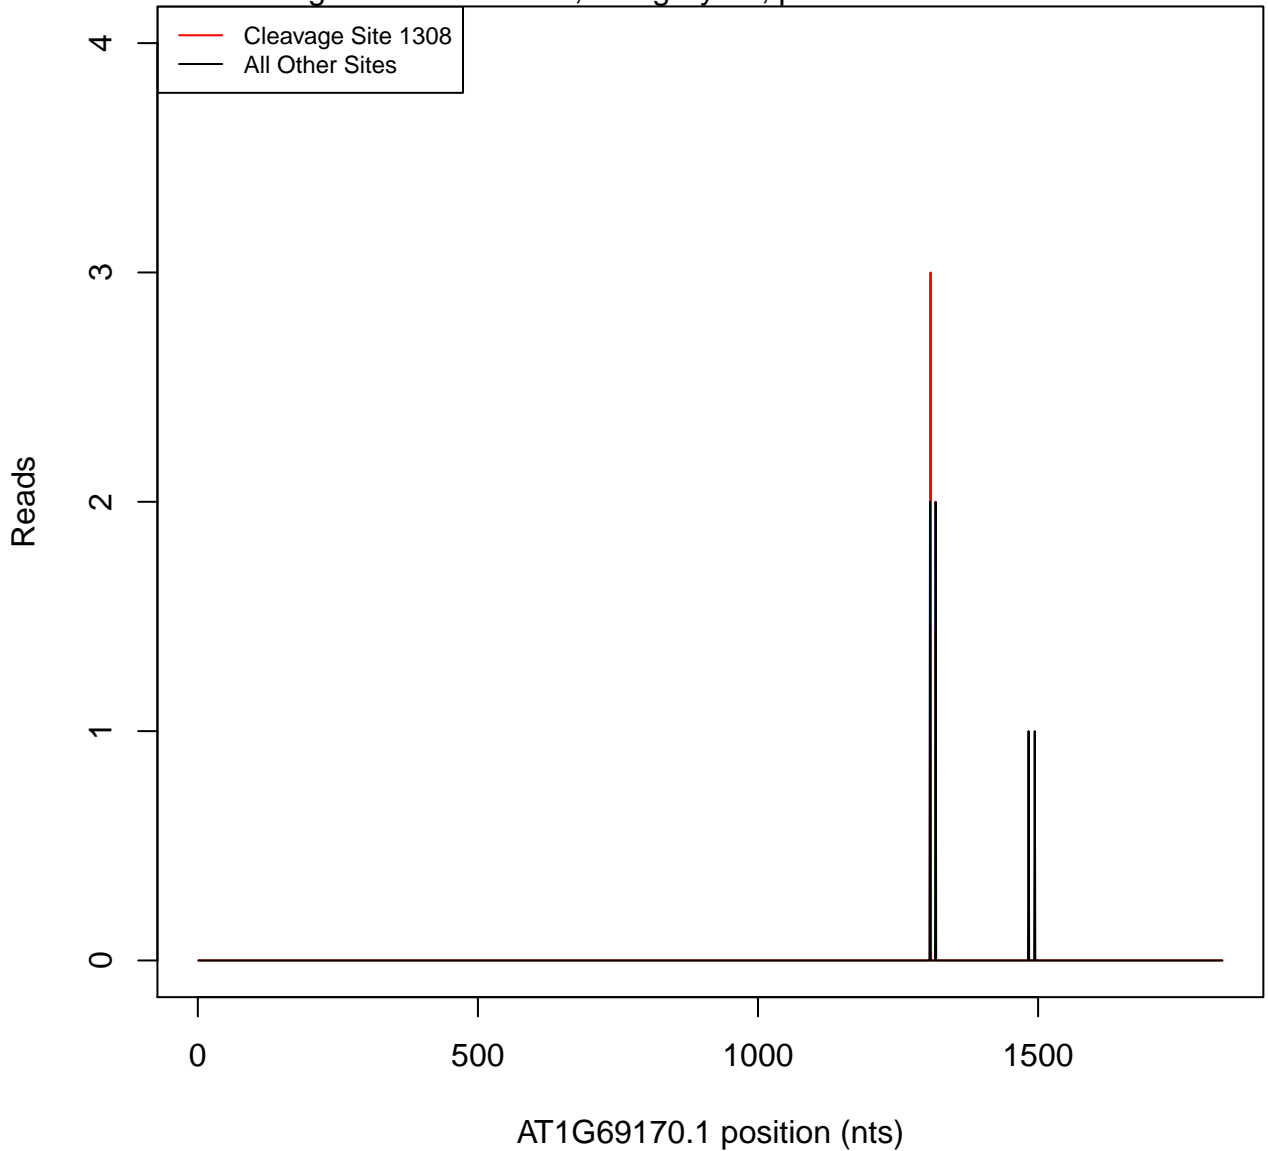

# ath-miR157b slicing AT1G69170.1 at nt 1308

alignment score=2.5 , category=0 , p=0.00421959089767709

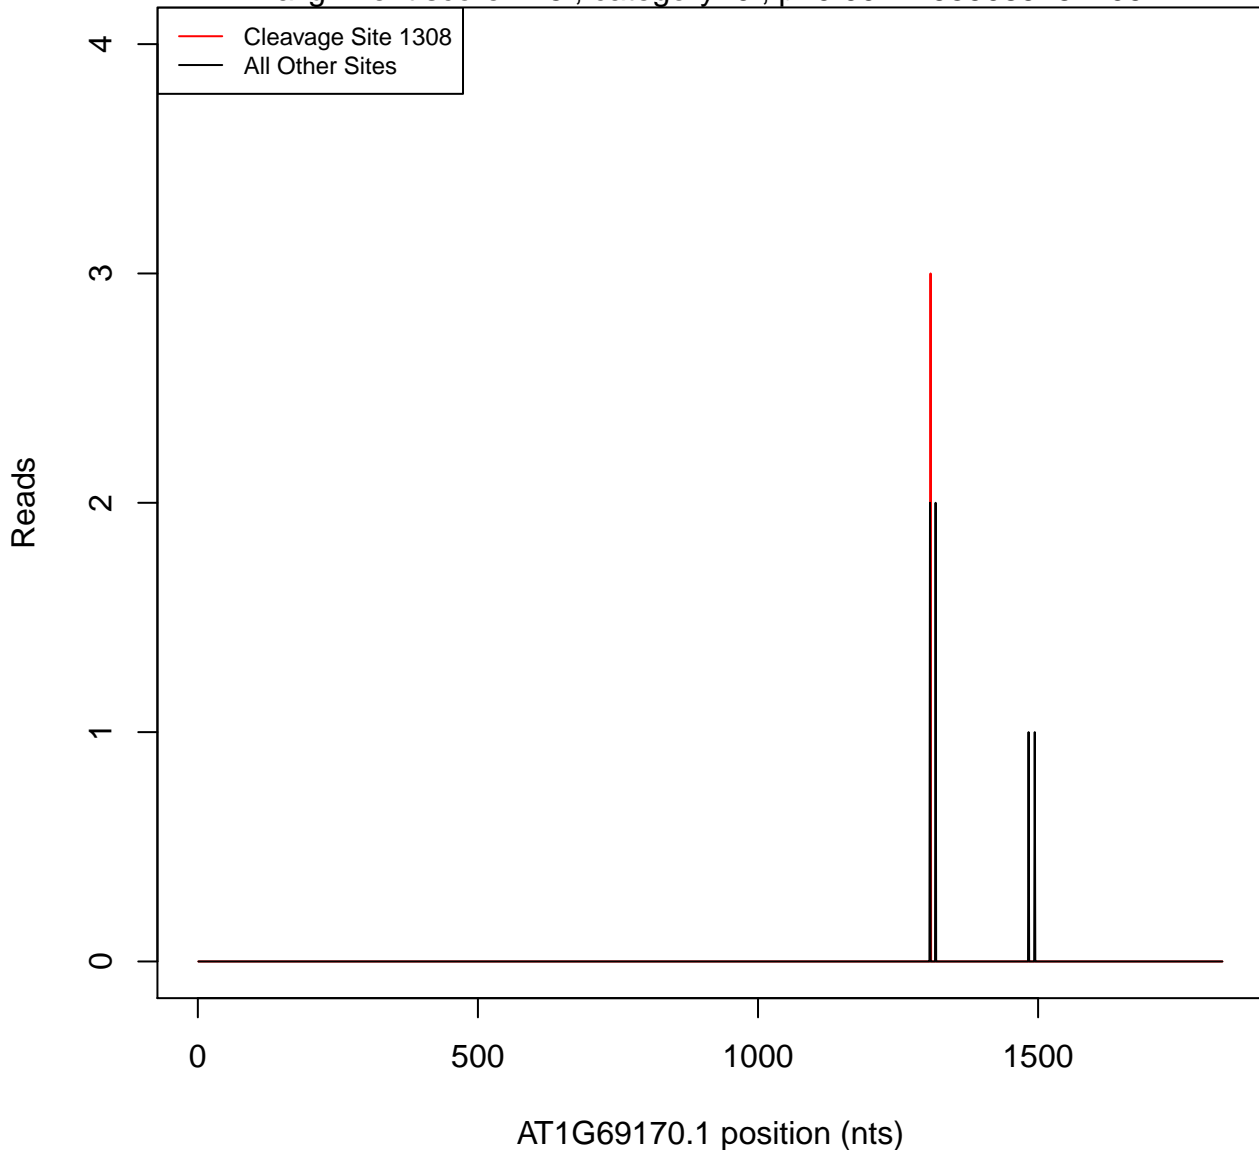

# ath-miR157c slicing AT1G69170.1 at nt 1308

alignment score=2.5 , category=0 , p=0.00421959089767709

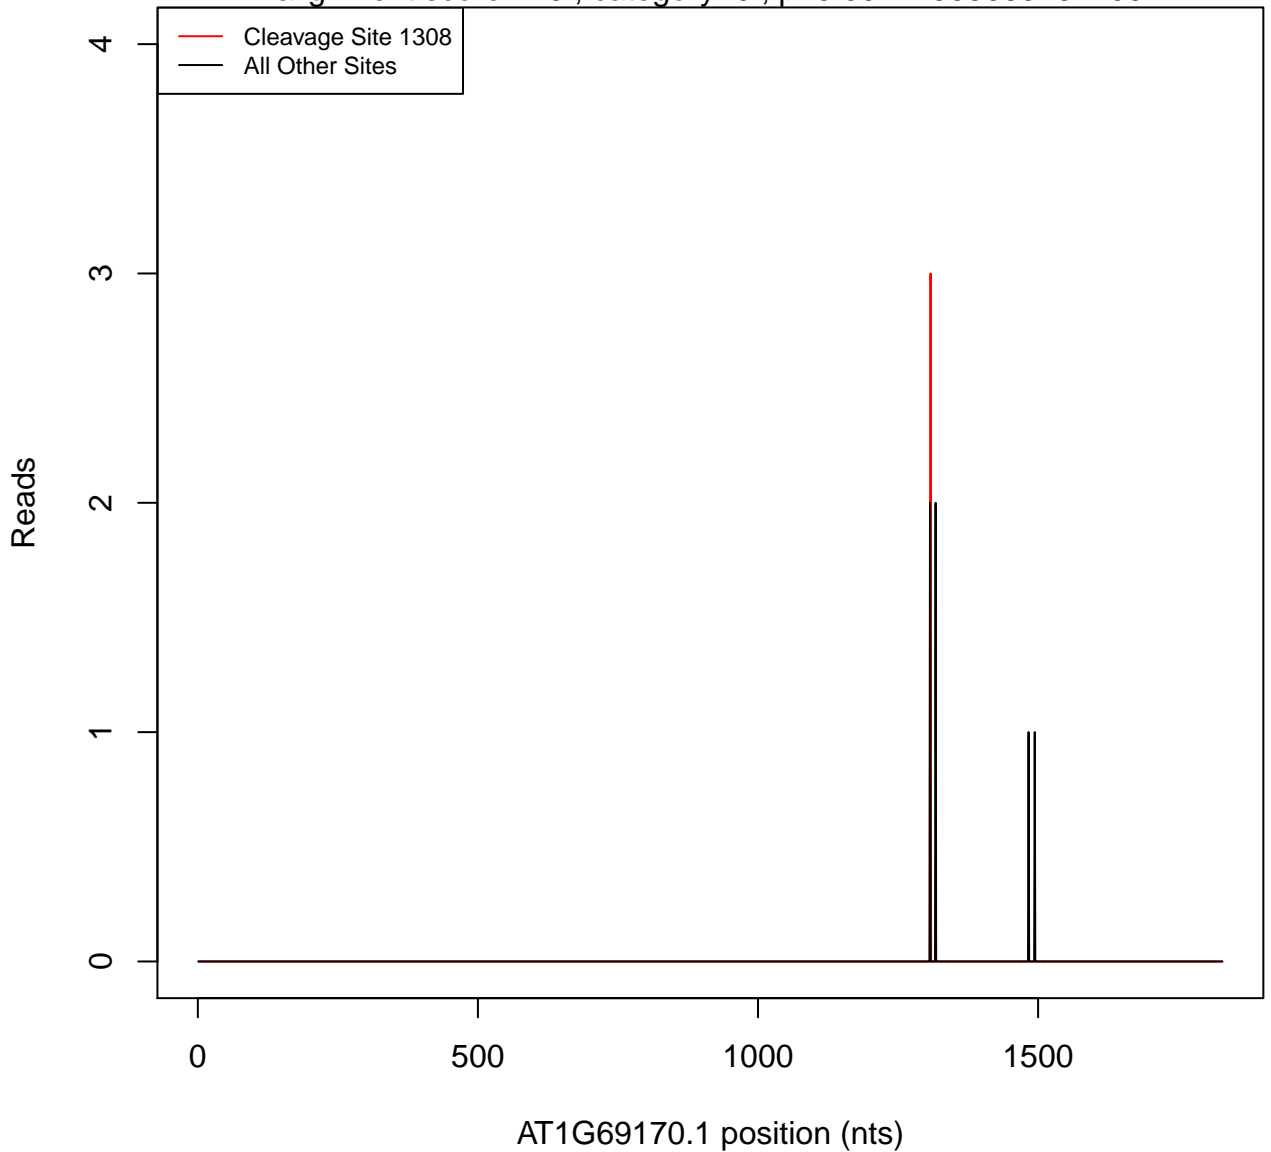



# ath-miR157d\_L+1 slicing AT1G69170.1 at nt 1308

alignment score=2.5 , category=0 , p=0.00421959089767709

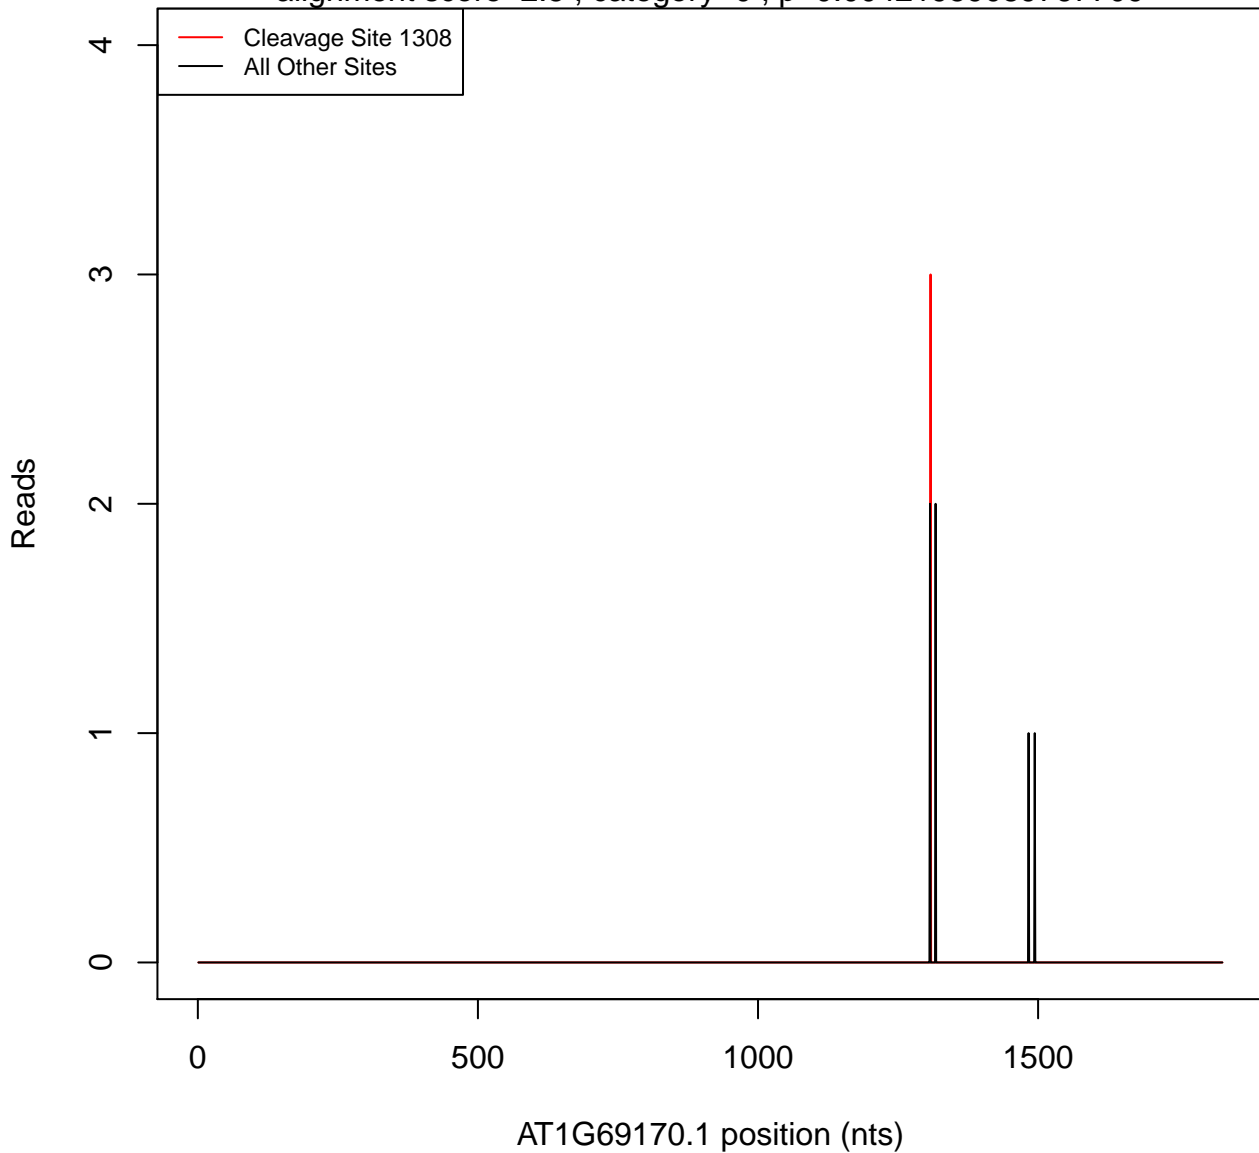

# ath-miR160a slicing AT1G77850.1 at nt 1420

alignment score=0.5 , category=0 , p=0.00295558657455874

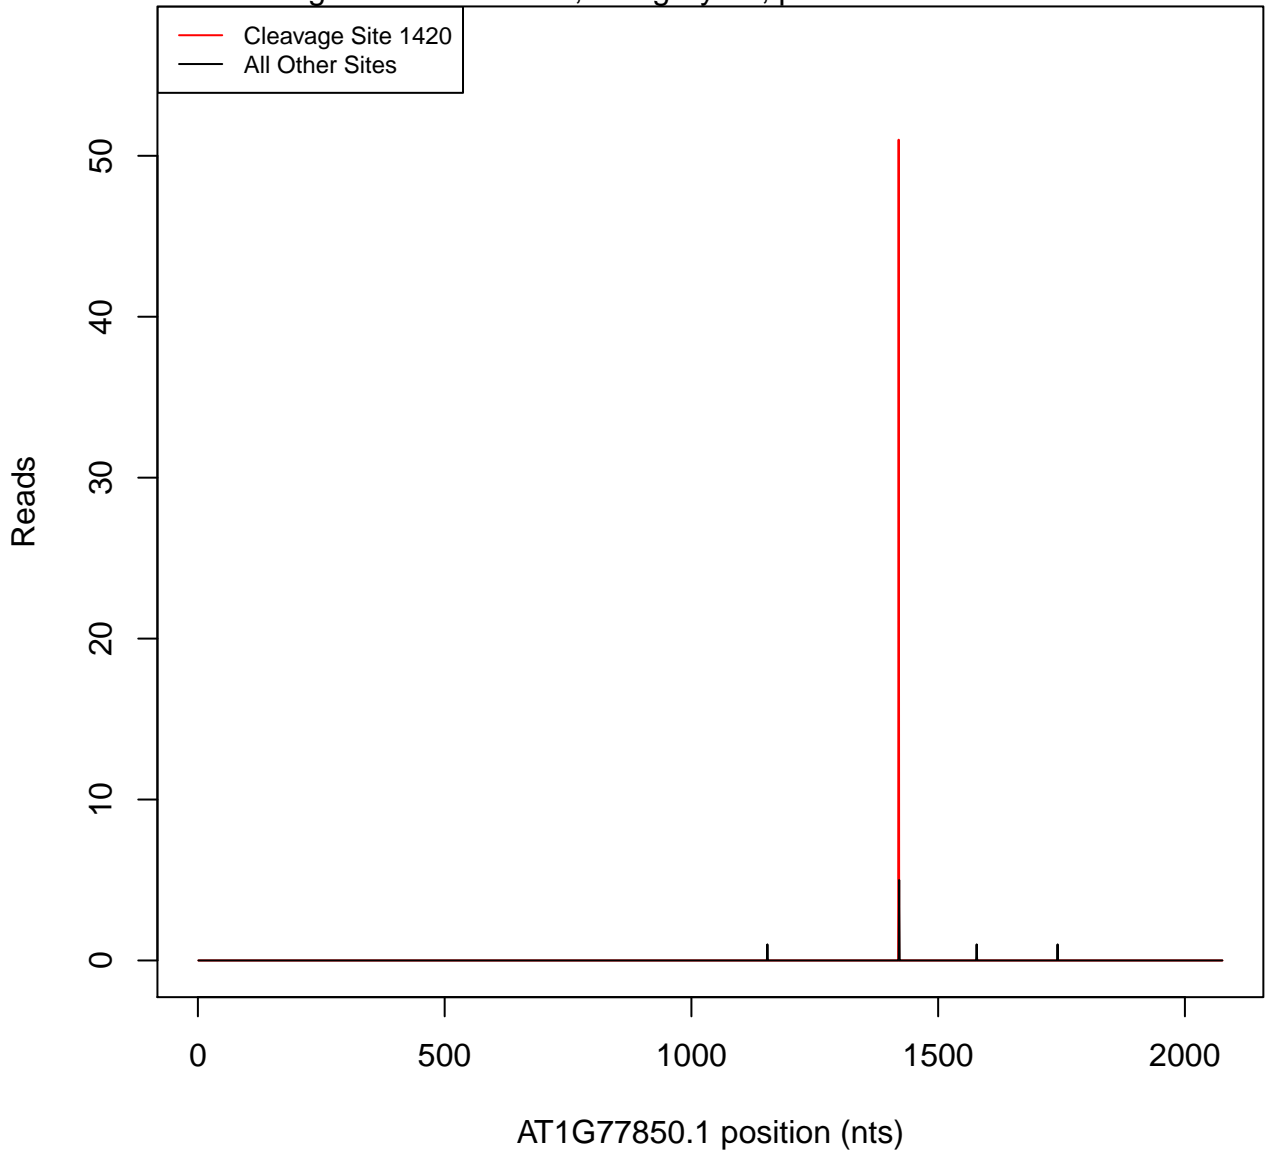

# ath-miR160b slicing AT1G77850.1 at nt 1420

alignment score=0.5 , category=0 , p=0.00295558657455874

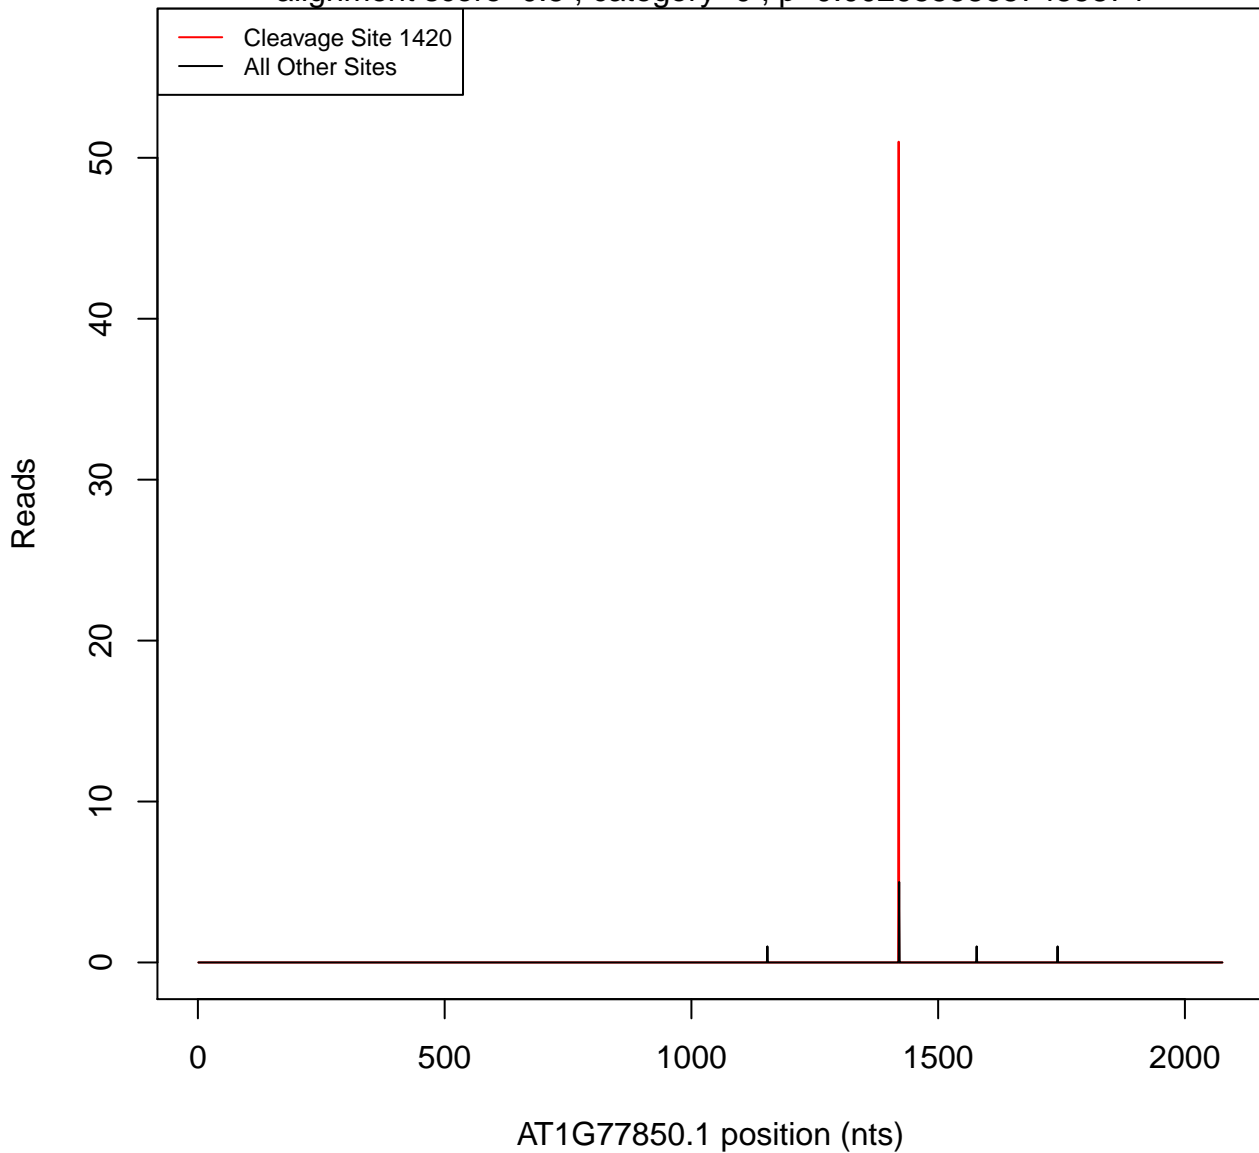

# ath-miR160c slicing AT1G77850.1 at nt 1420

alignment score=0.5 , category=0 , p=0.00295558657455874



# ath-MIR172c-p5 slicing AT1G79730.1 at nt 1220

alignment score=3.5 , category=0 , p=0.00842137684801048

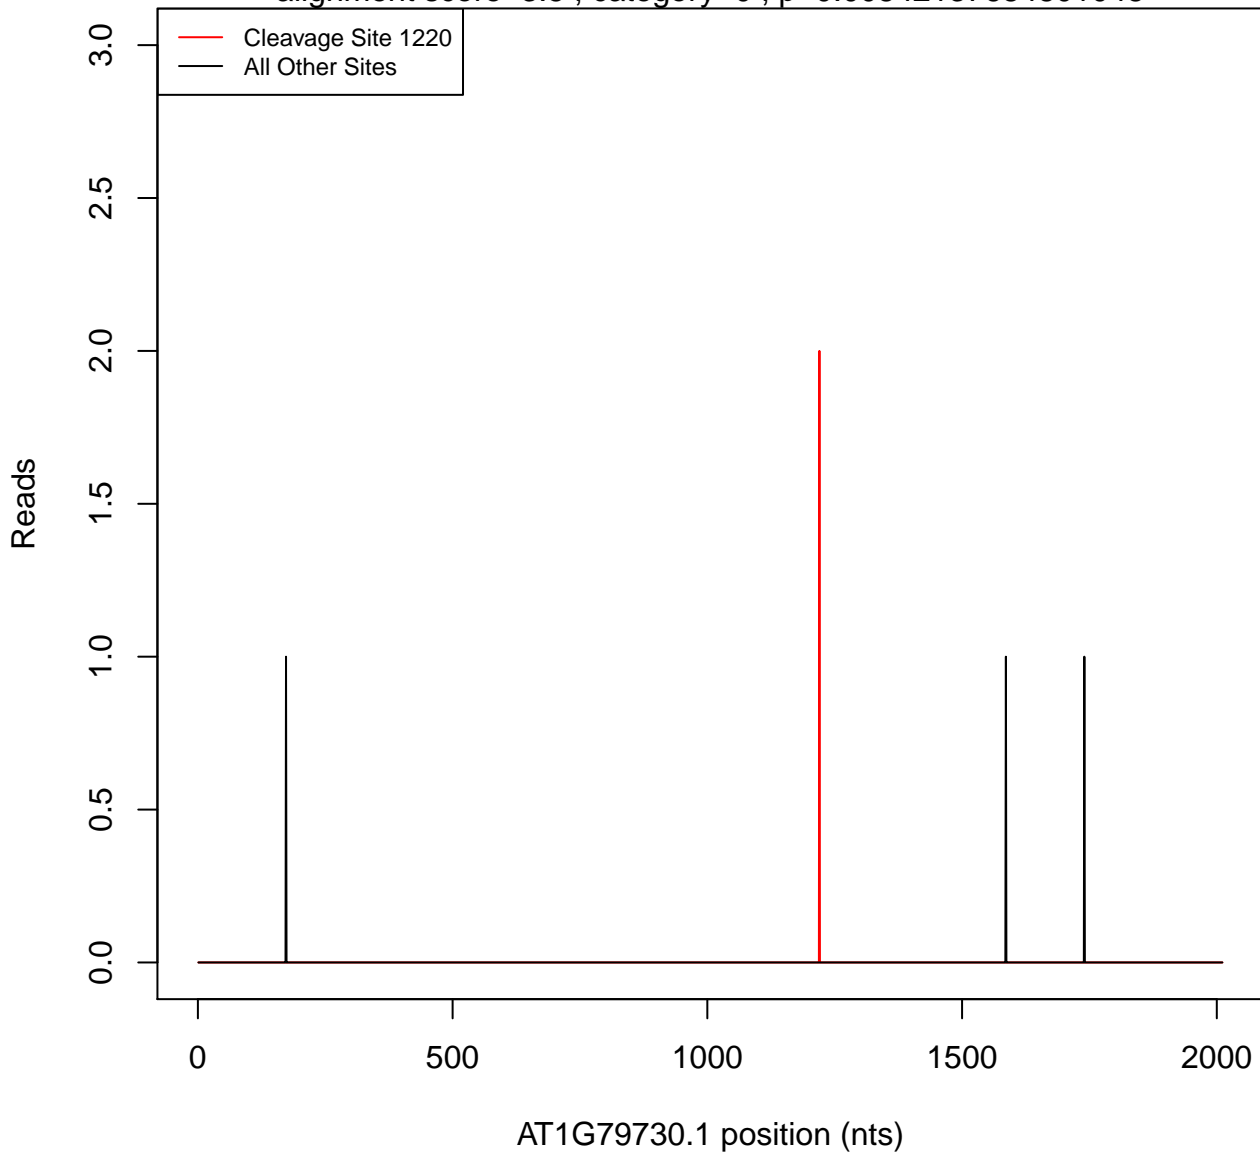

# ath-miR396a slicing AT2G22840.1 at nt 792

alignment score=3.5 , category=0 , p=0.0117700365439392

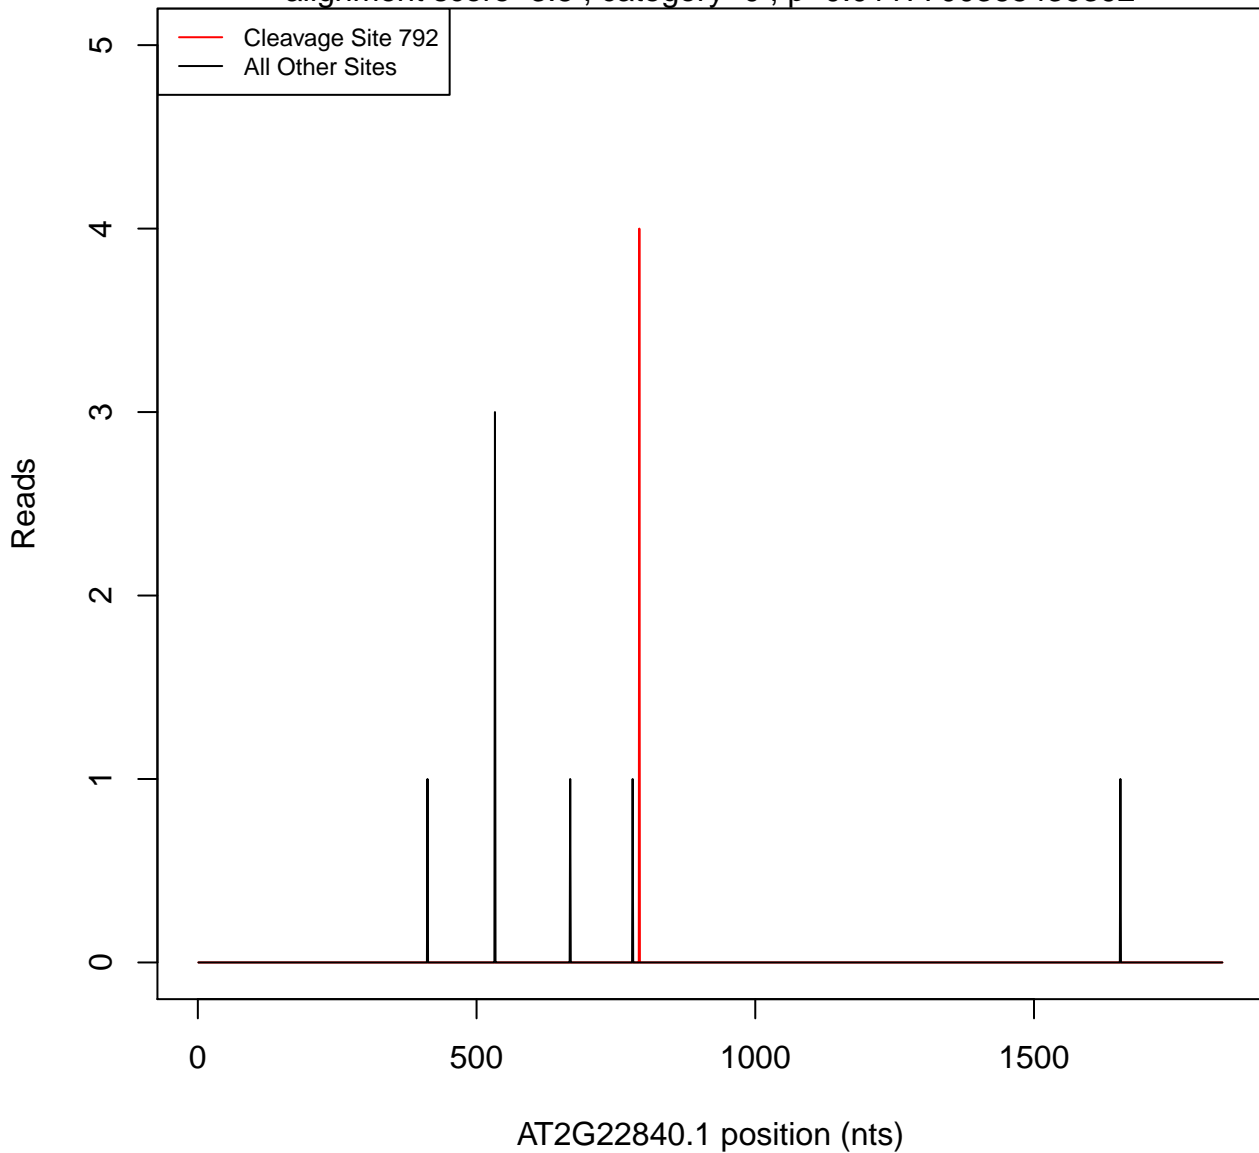

# ath-miR396b slicing AT2G22840.1 at nt 792

alignment score=4 , category=0 , p=0.0405926042712963

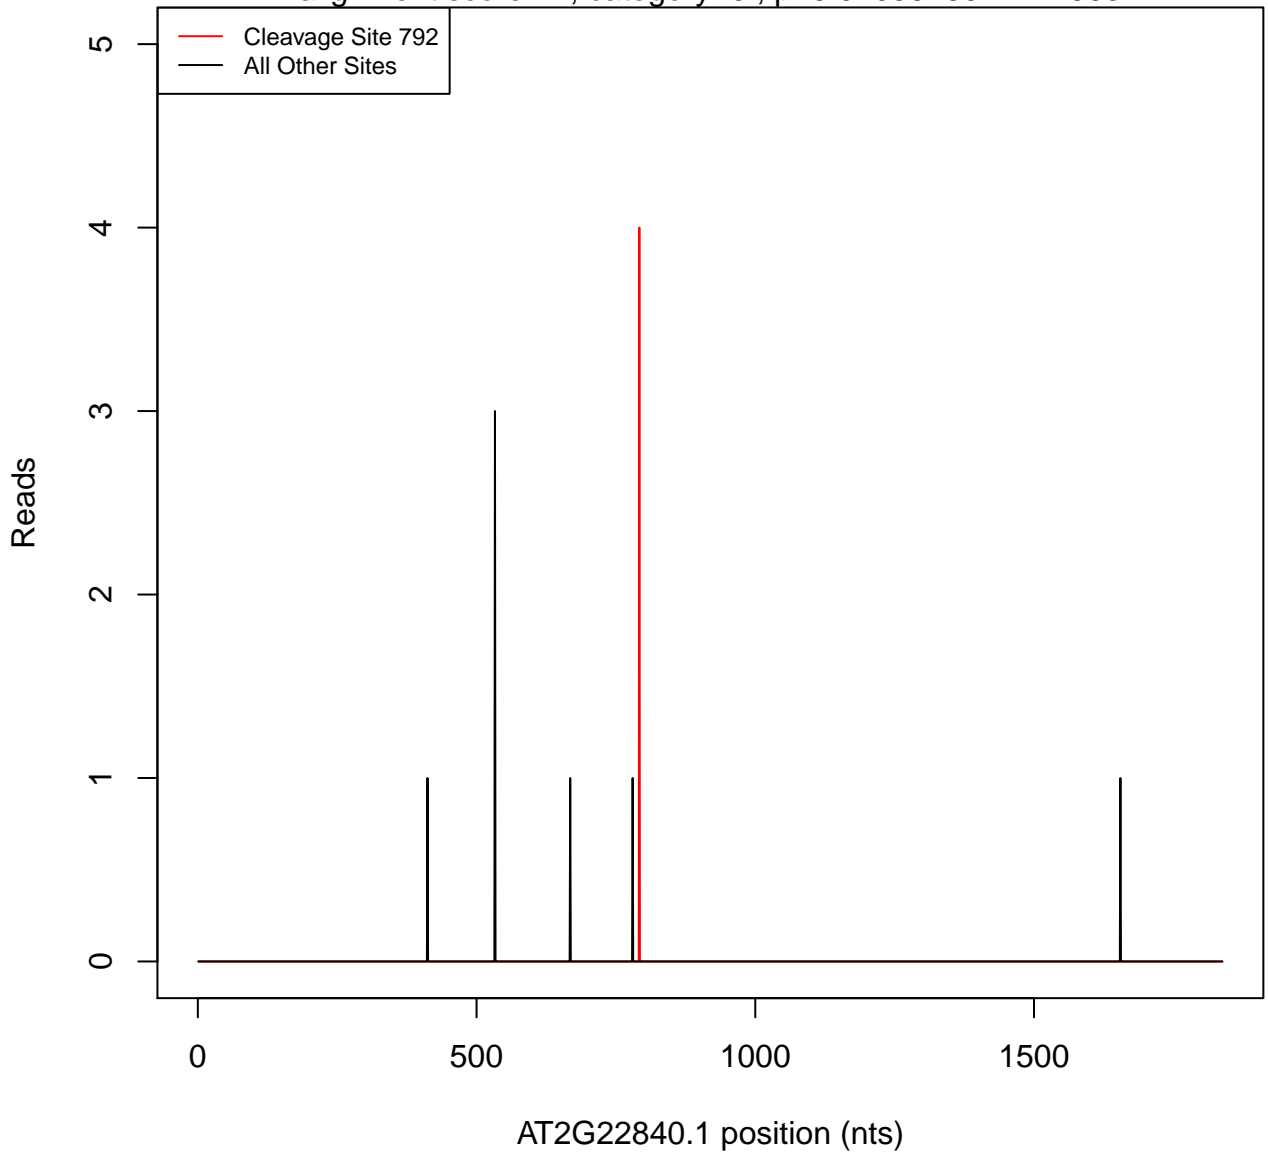

# ath-miR414 slicing AT2G27170.1 at nt 3326

alignment score=1.5 , category=3 , p=0.0989996202653091

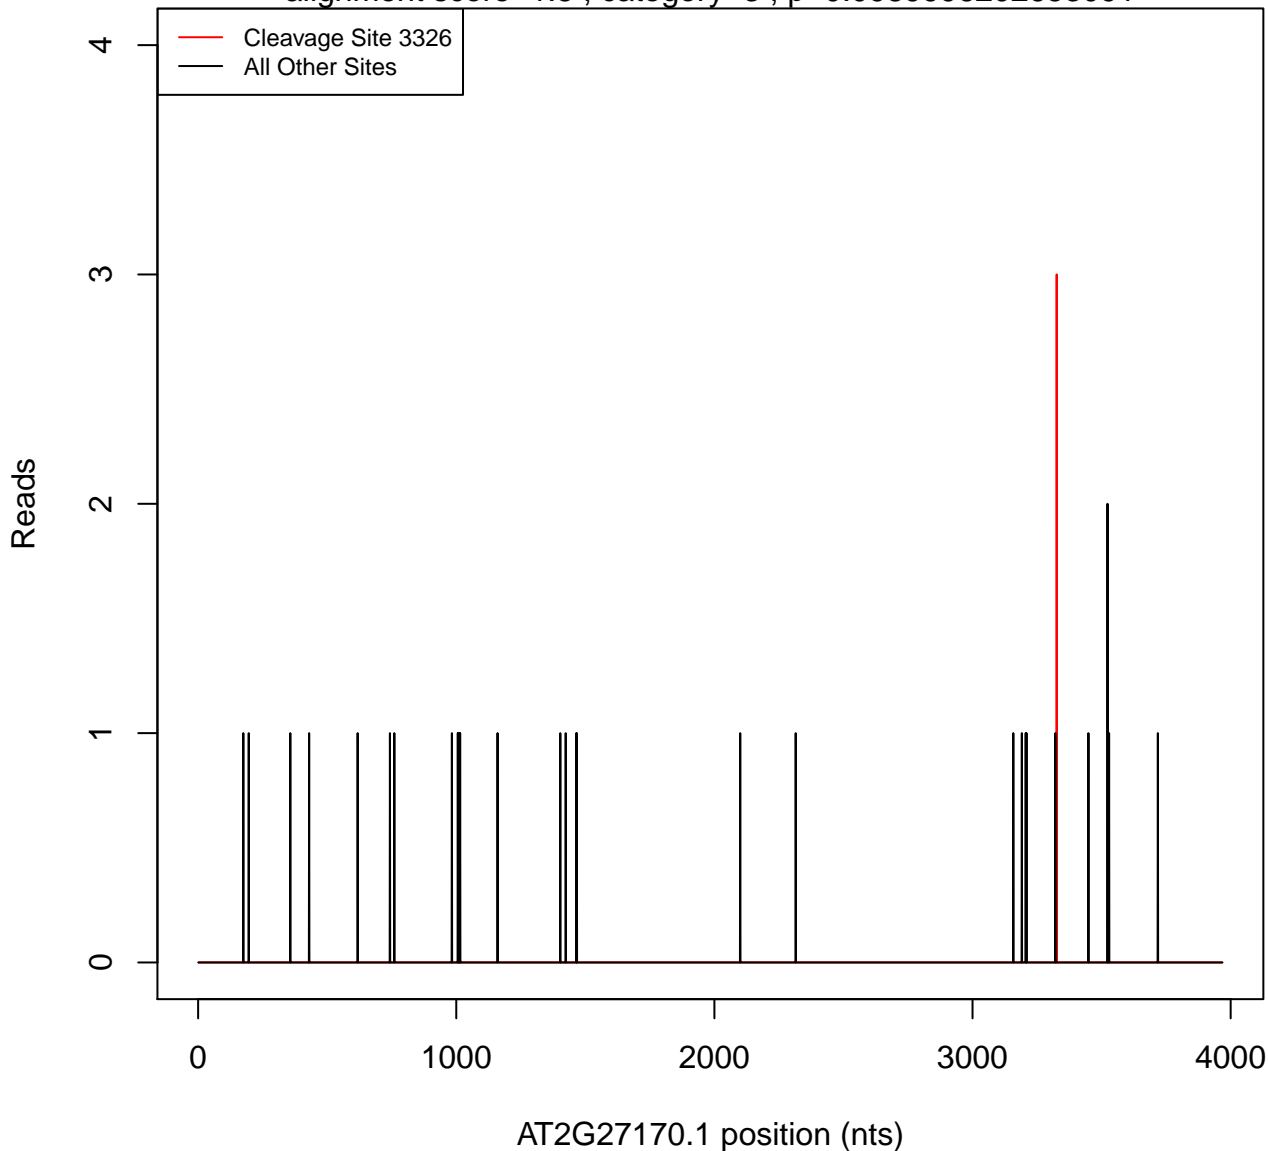



# ath-miR414 slicing AT2G27170.2 at nt 3345

alignment score=1.5 , category=3 , p=0.0989996202653091

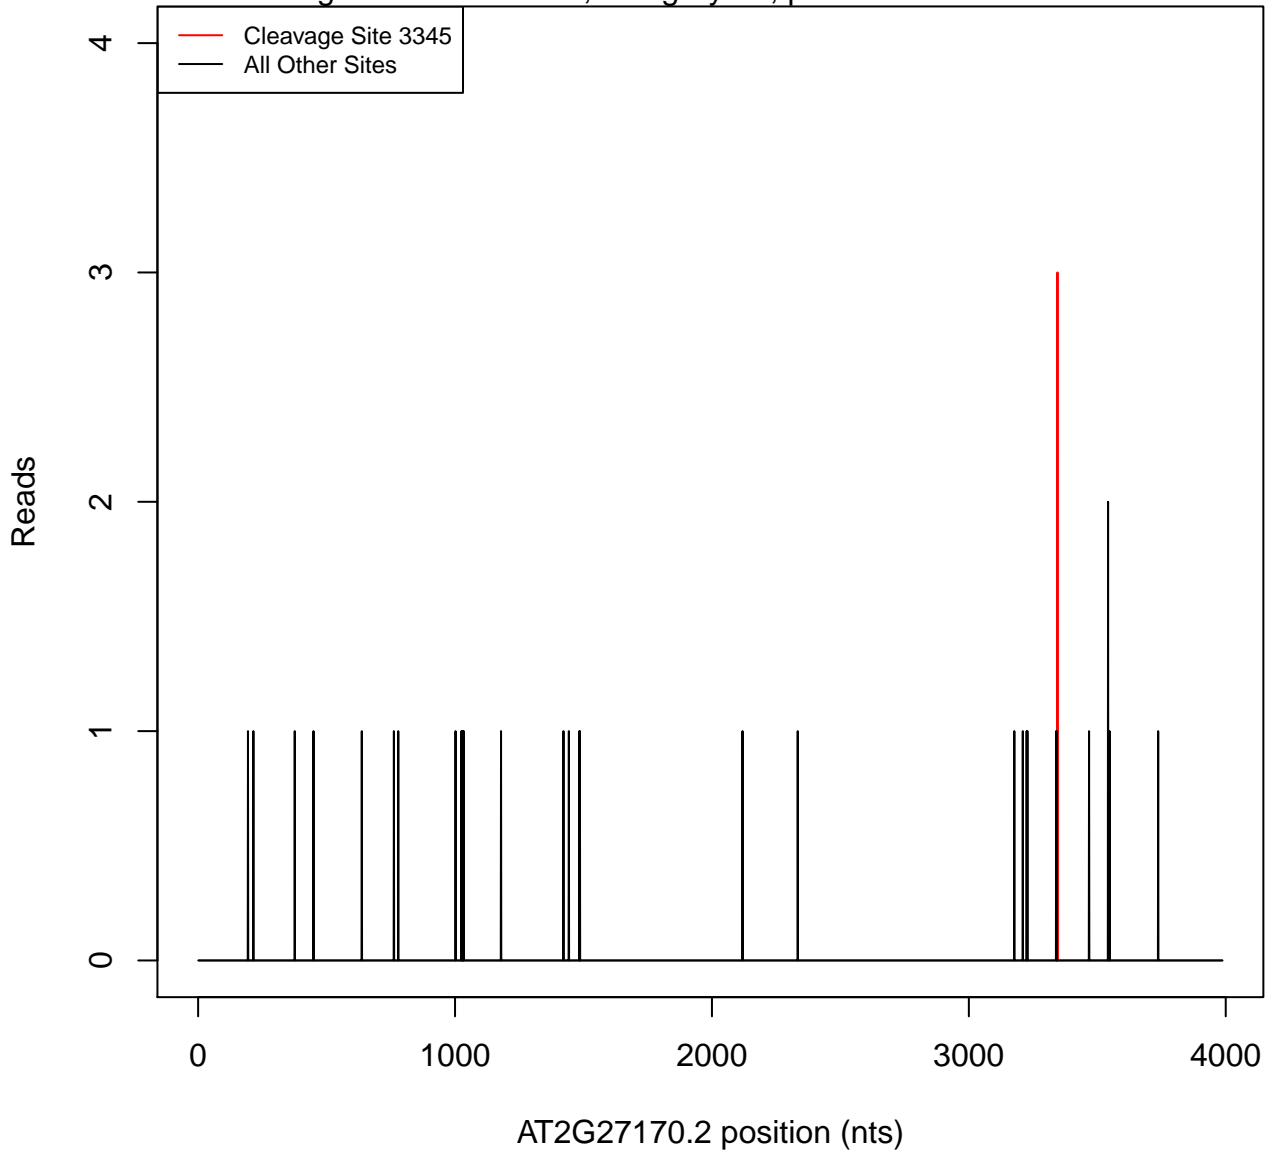

# ath-miR319a slicing AT2G31070.1 at nt 1391

alignment score=3.5 , category=0 , p=0.00674279424614888

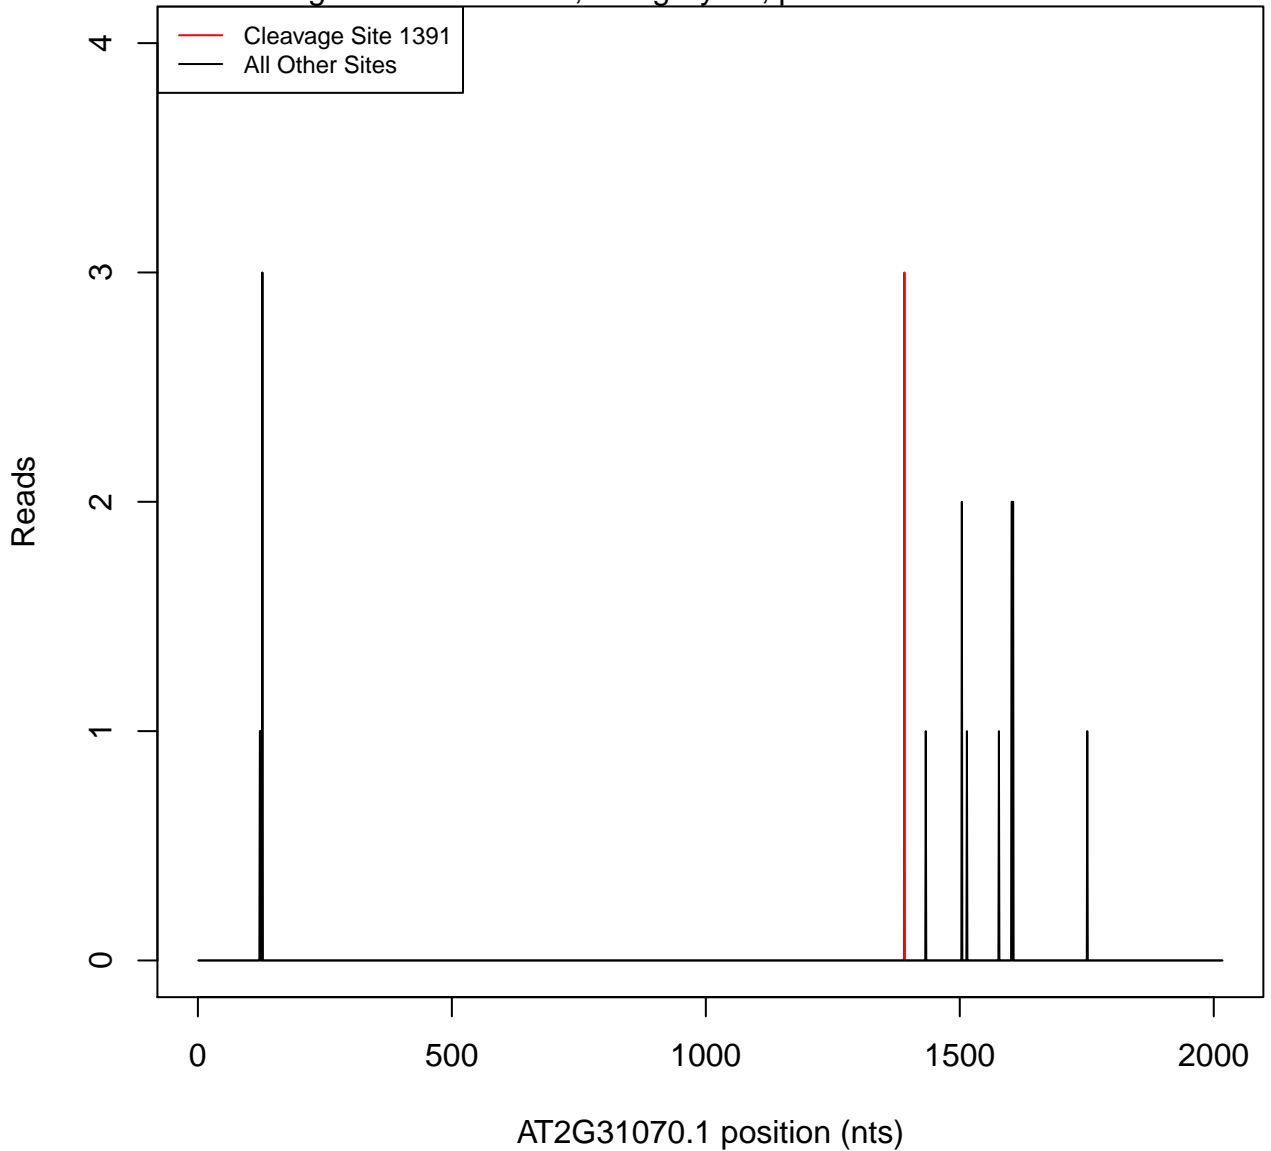

# ath-miR319b slicing AT2G31070.1 at nt 1391

alignment score=3.5 , category=0 , p=0.00674279424614888

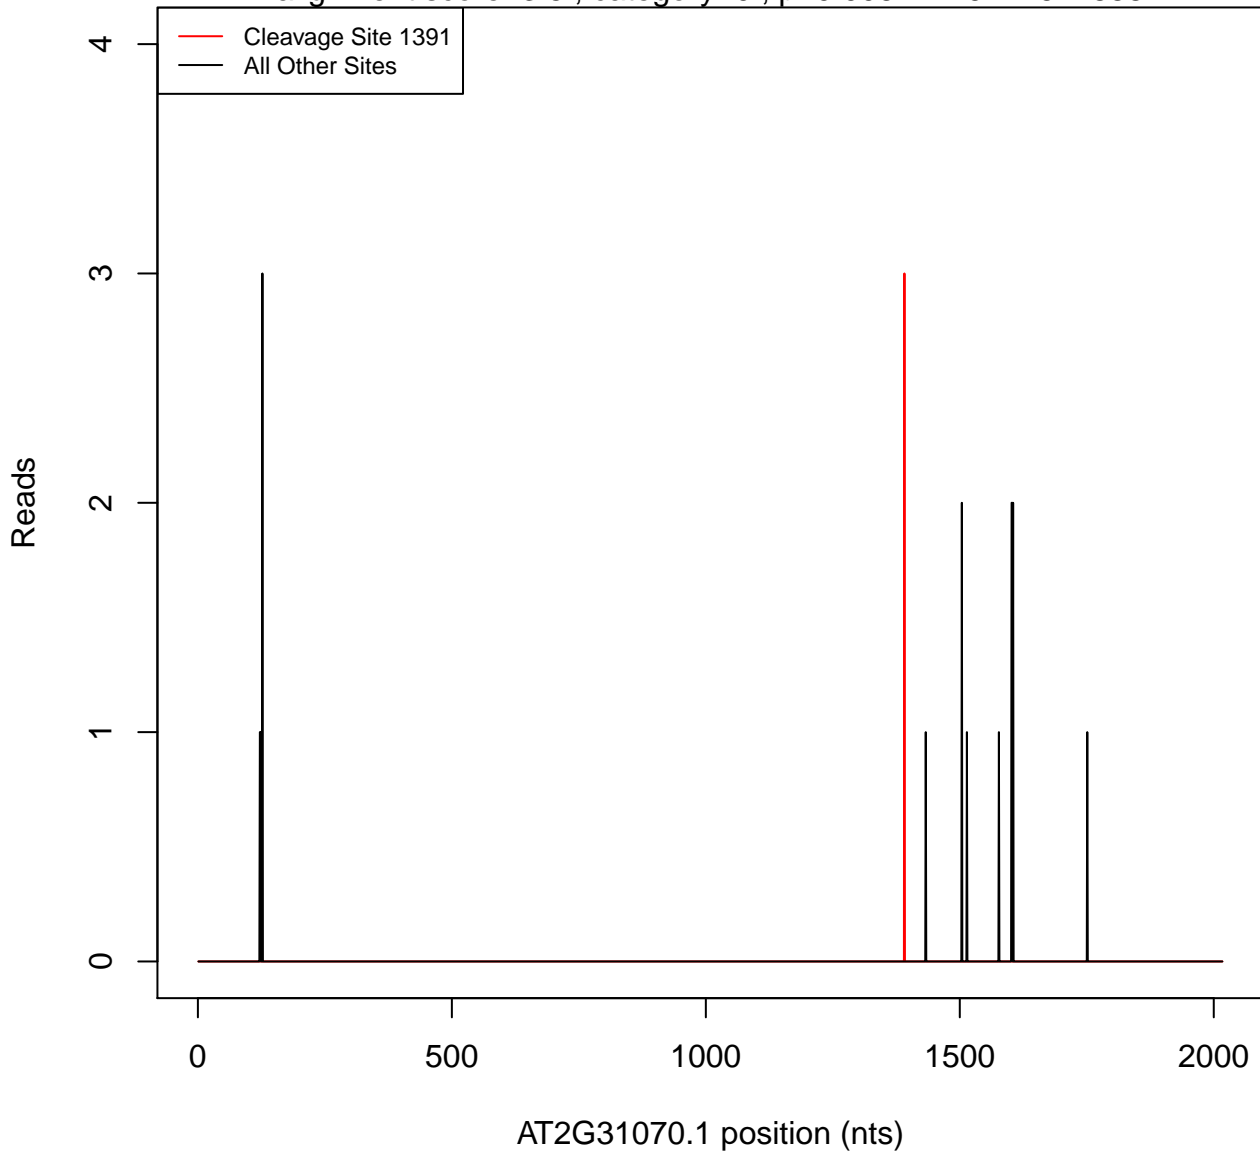

# ath-miR319c slicing AT2G31070.1 at nt 1391

alignment score=2.5 , category=0 , p=0.00211202577527625



# ath-miR165a slicing AT2G34710.1 at nt 881

alignment score=2.5 , category=3 , p=0.0263765645194631

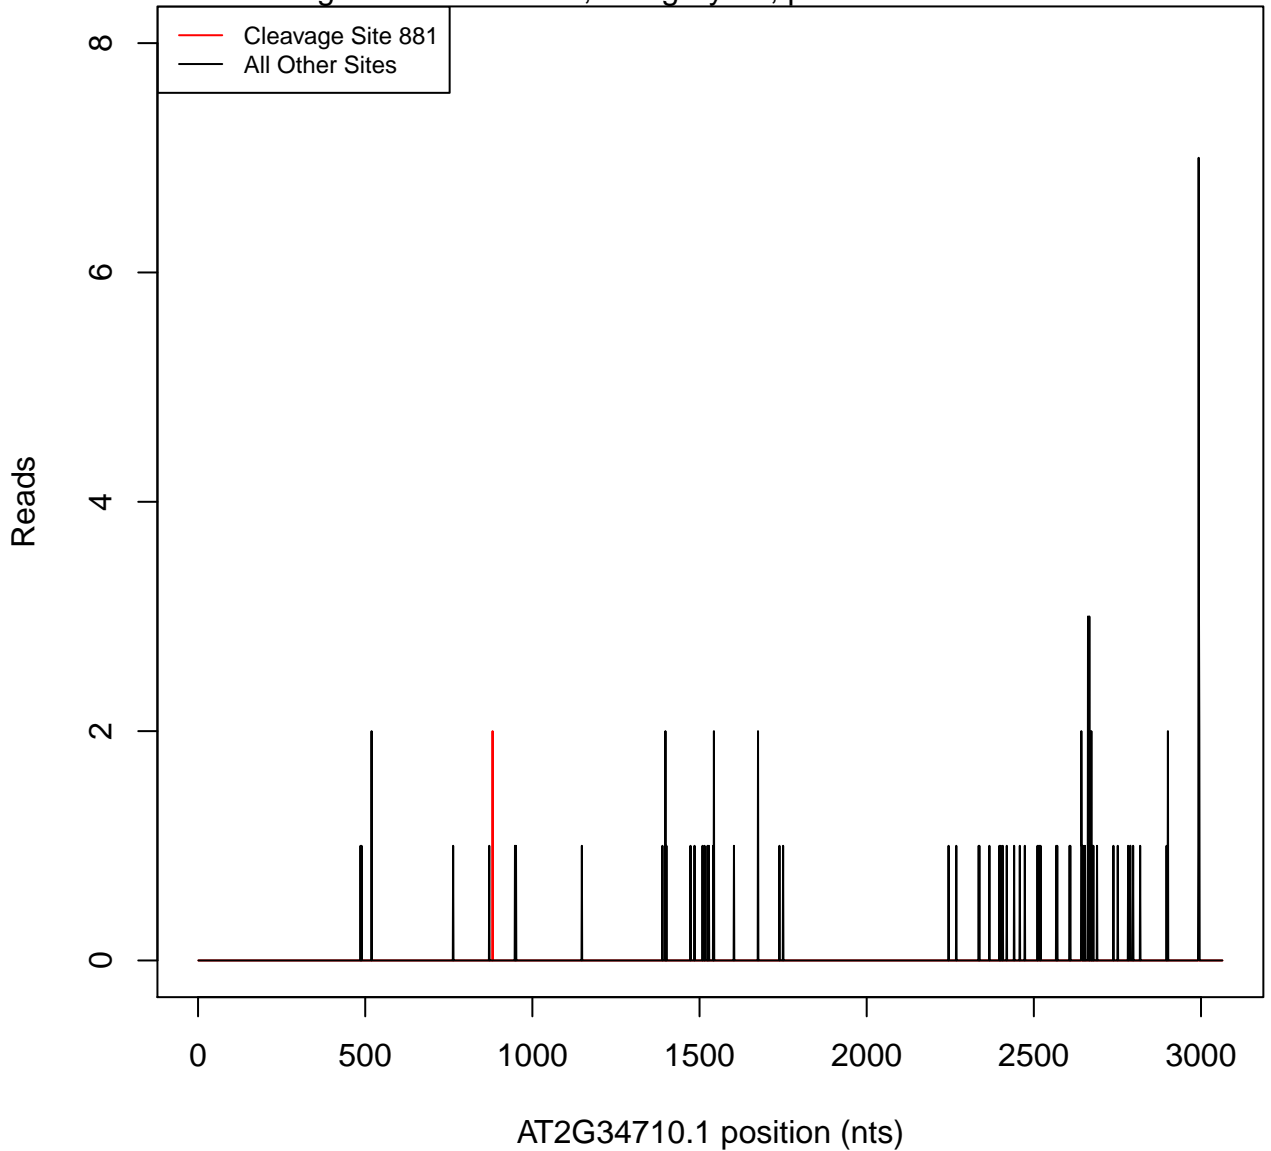

# ath-miR165b slicing AT2G34710.1 at nt 881

alignment score=2.5 , category=3 , p=0.0263765645194631

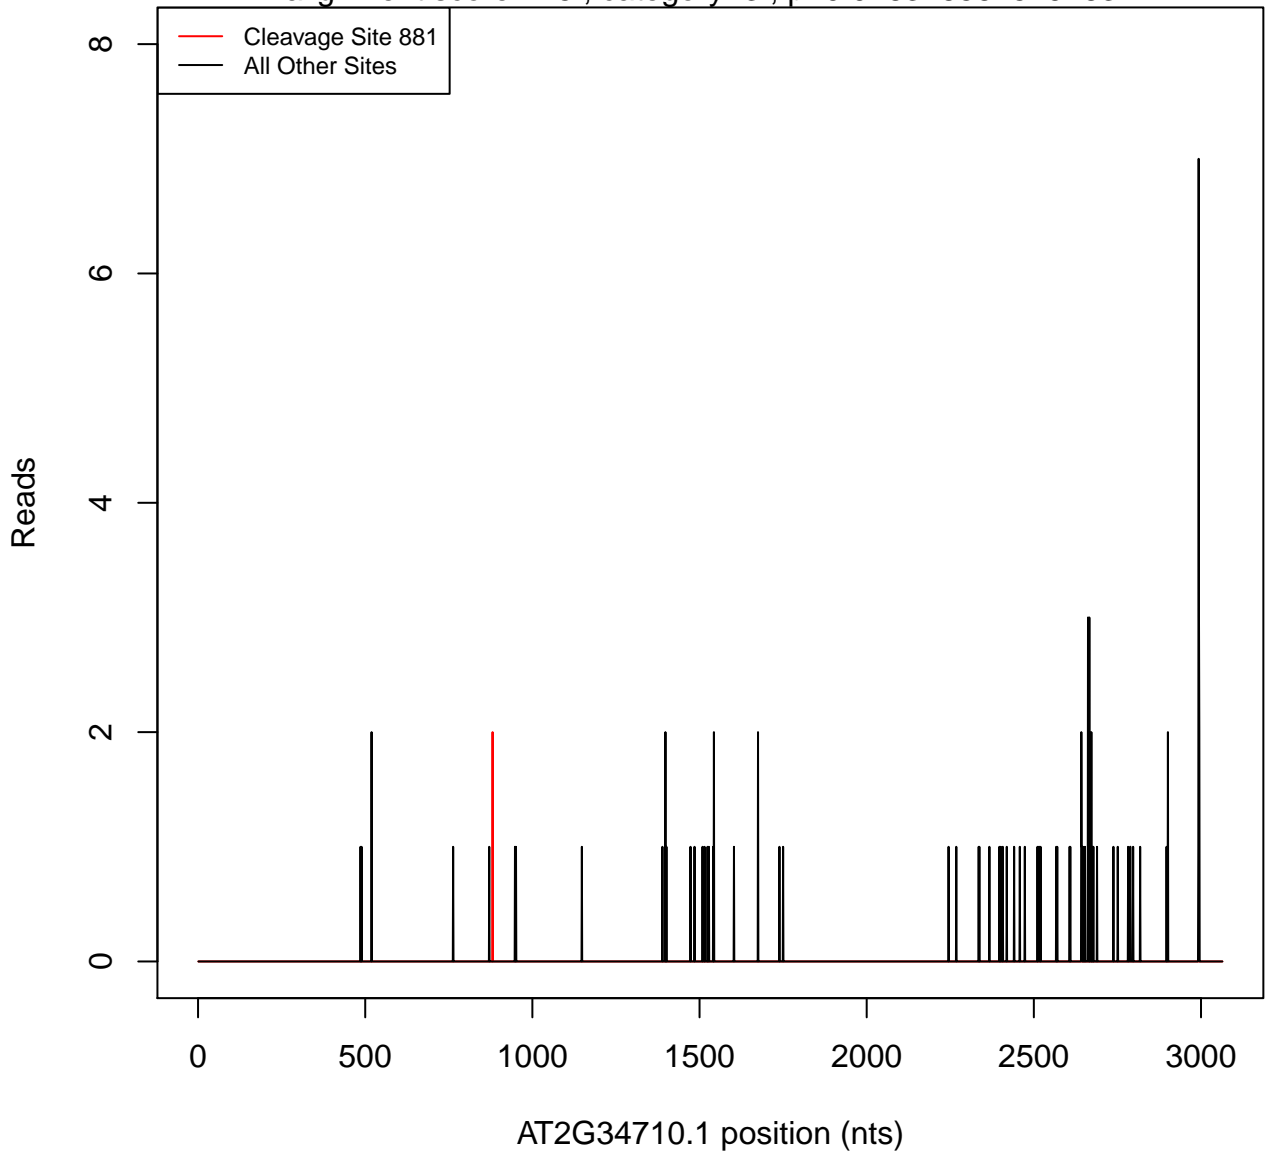

# ath-miR166a slicing AT2G34710.1 at nt 881

alignment score=3 , category=3 , p=0.0237705226602556

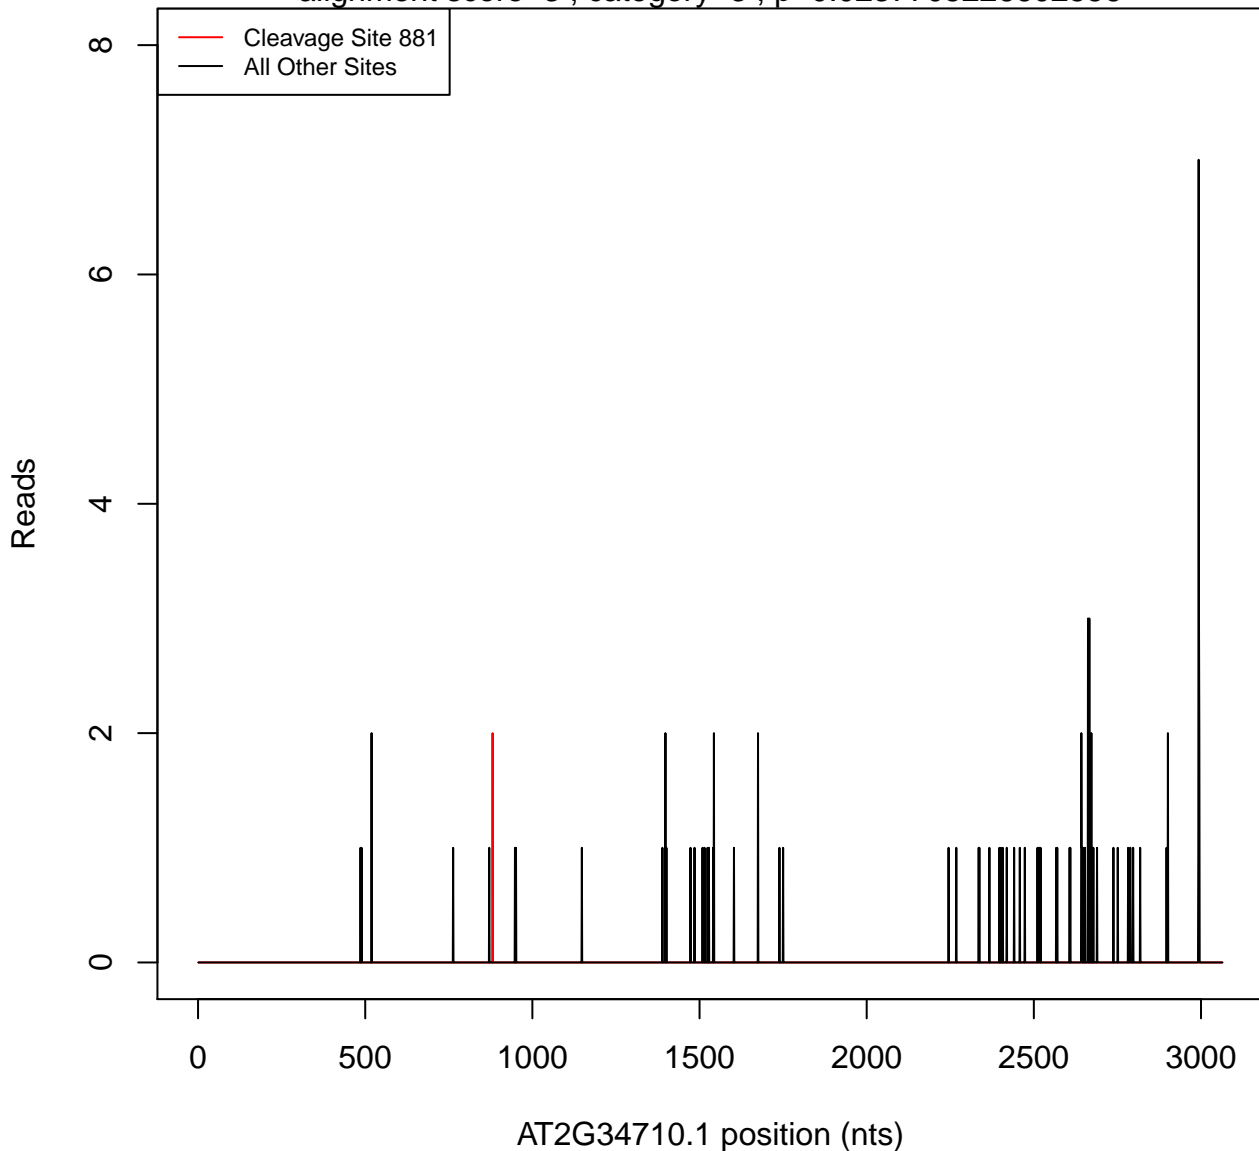

# ath-miR166b slicing AT2G34710.1 at nt 881

alignment score=3 , category=3 , p=0.0237705226602556

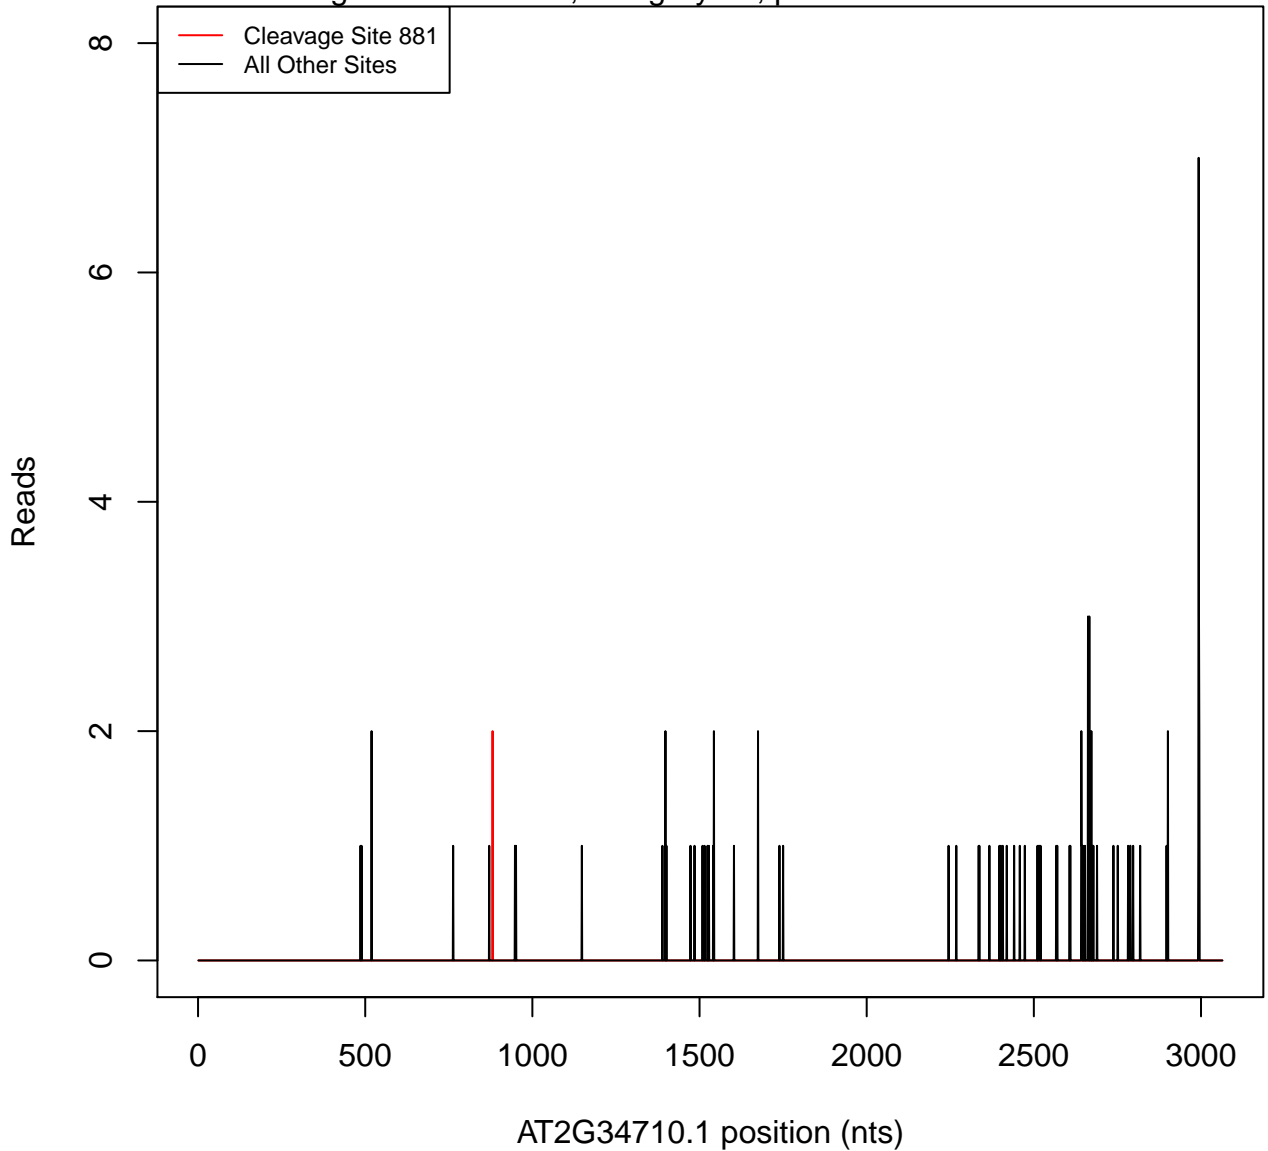



# ath-miR166c slicing AT2G34710.1 at nt 881

alignment score=3 , category=3 , p=0.0237705226602556



# ath-miR166d slicing AT2G34710.1 at nt 881

alignment score=3 , category=3 , p=0.0237705226602556

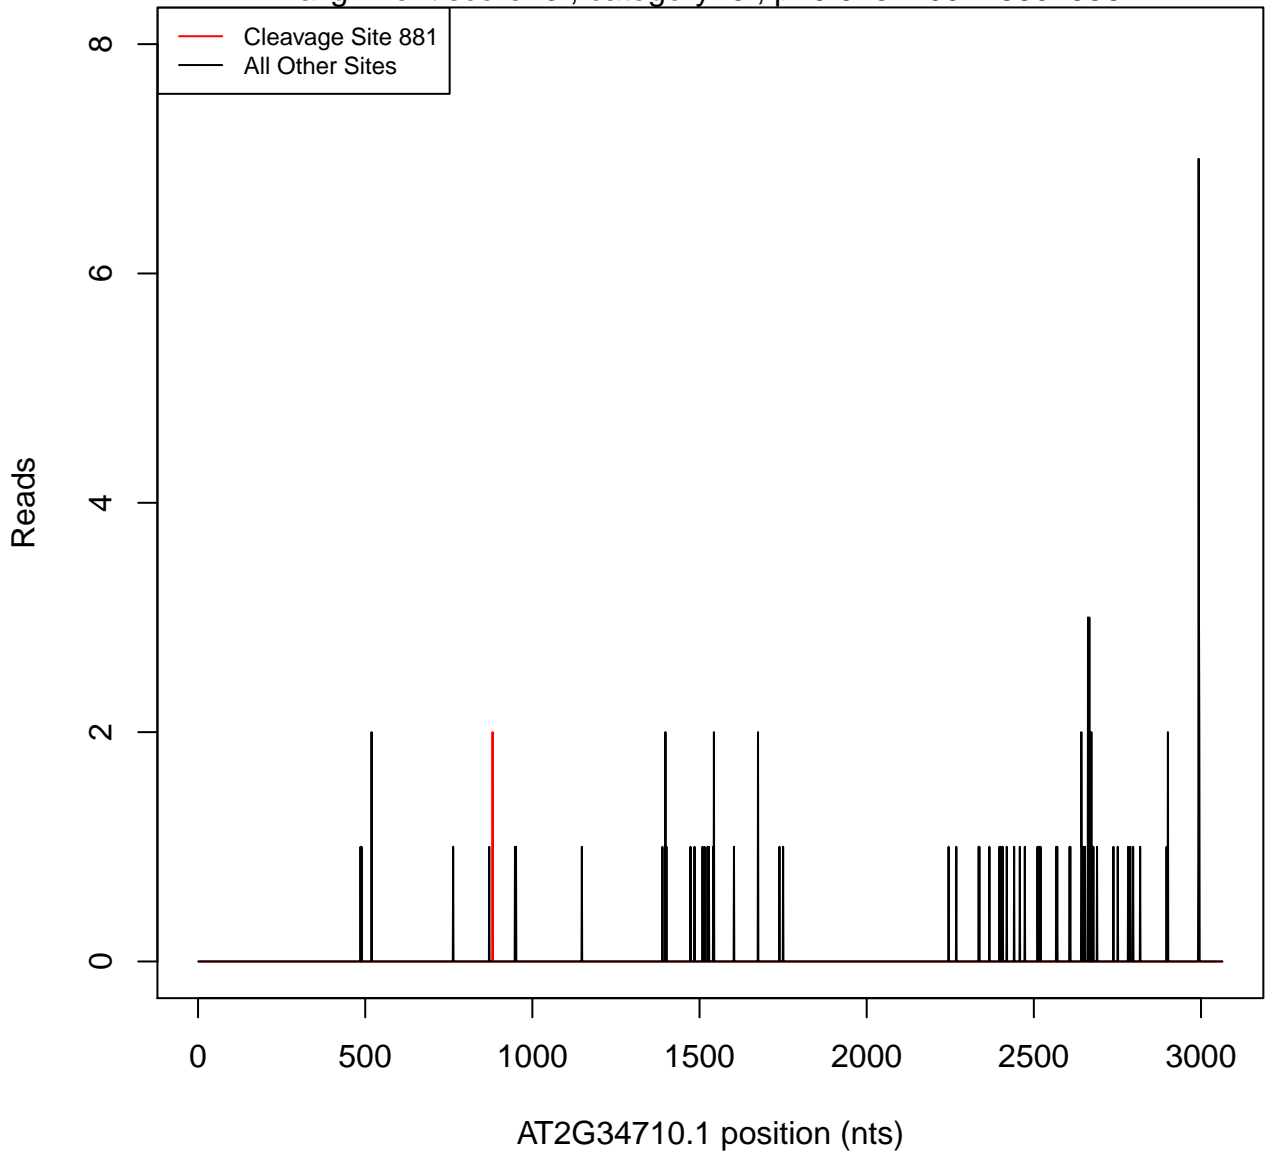

# ath-miR166e slicing AT2G34710.1 at nt 881

alignment score=3 , category=3 , p=0.0237705226602556



# ath-miR166f slicing AT2G34710.1 at nt 881

alignment score=3 , category=3 , p=0.0237705226602556

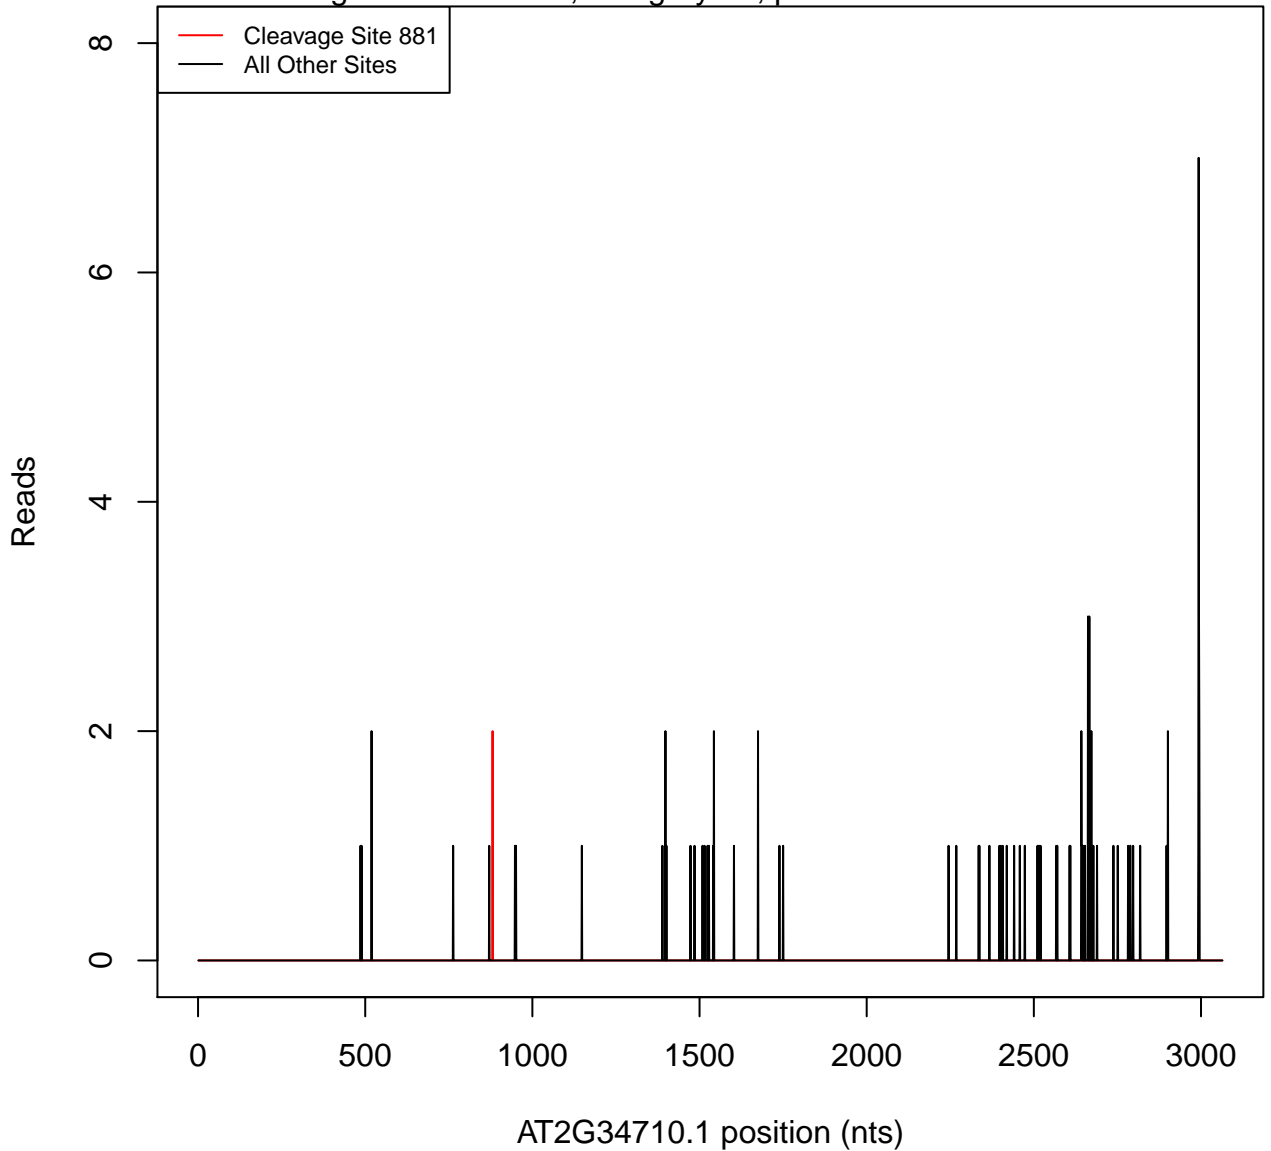

# ath-miR166g slicing AT2G34710.1 at nt 881

alignment score=3 , category=3 , p=0.0237705226602556



# gma-miR166a-3p\_1ss21CT slicing AT2G34710.1 at nt 881

alignment score=3 , category=3 , p=0.0237705226602556



# ath-miR171b slicing AT2G45160.1 at nt 1011

alignment score=3 , category=0 , p=0.00569223744064928

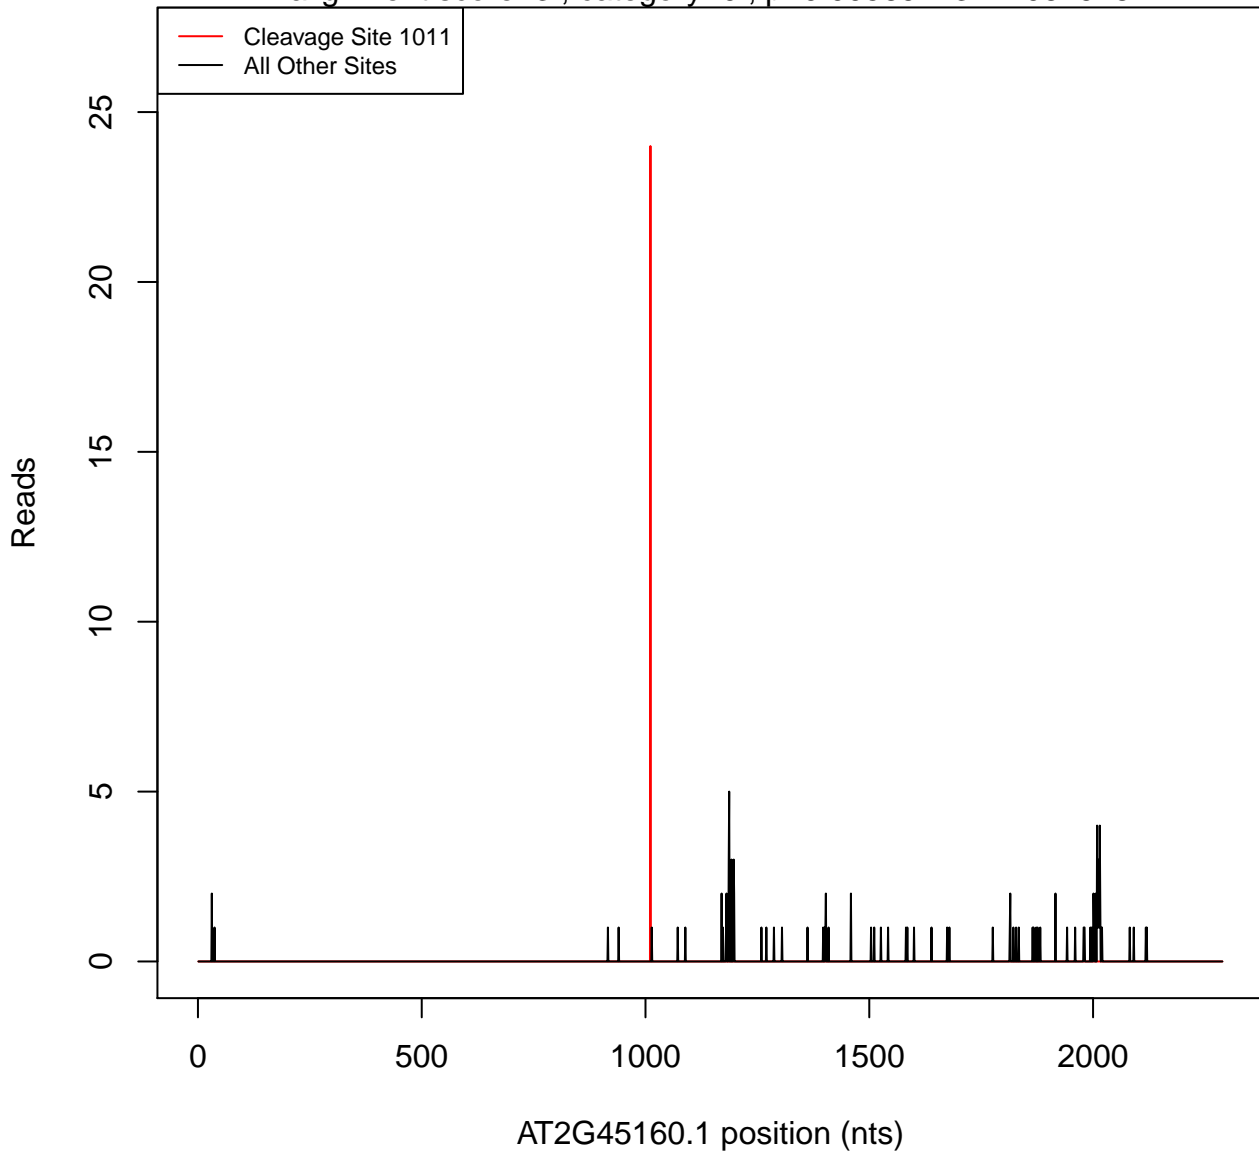

# ath-miR171c slicing AT2G45160.1 at nt 1011

alignment score=3 , category=0 , p=0.00569223744064928

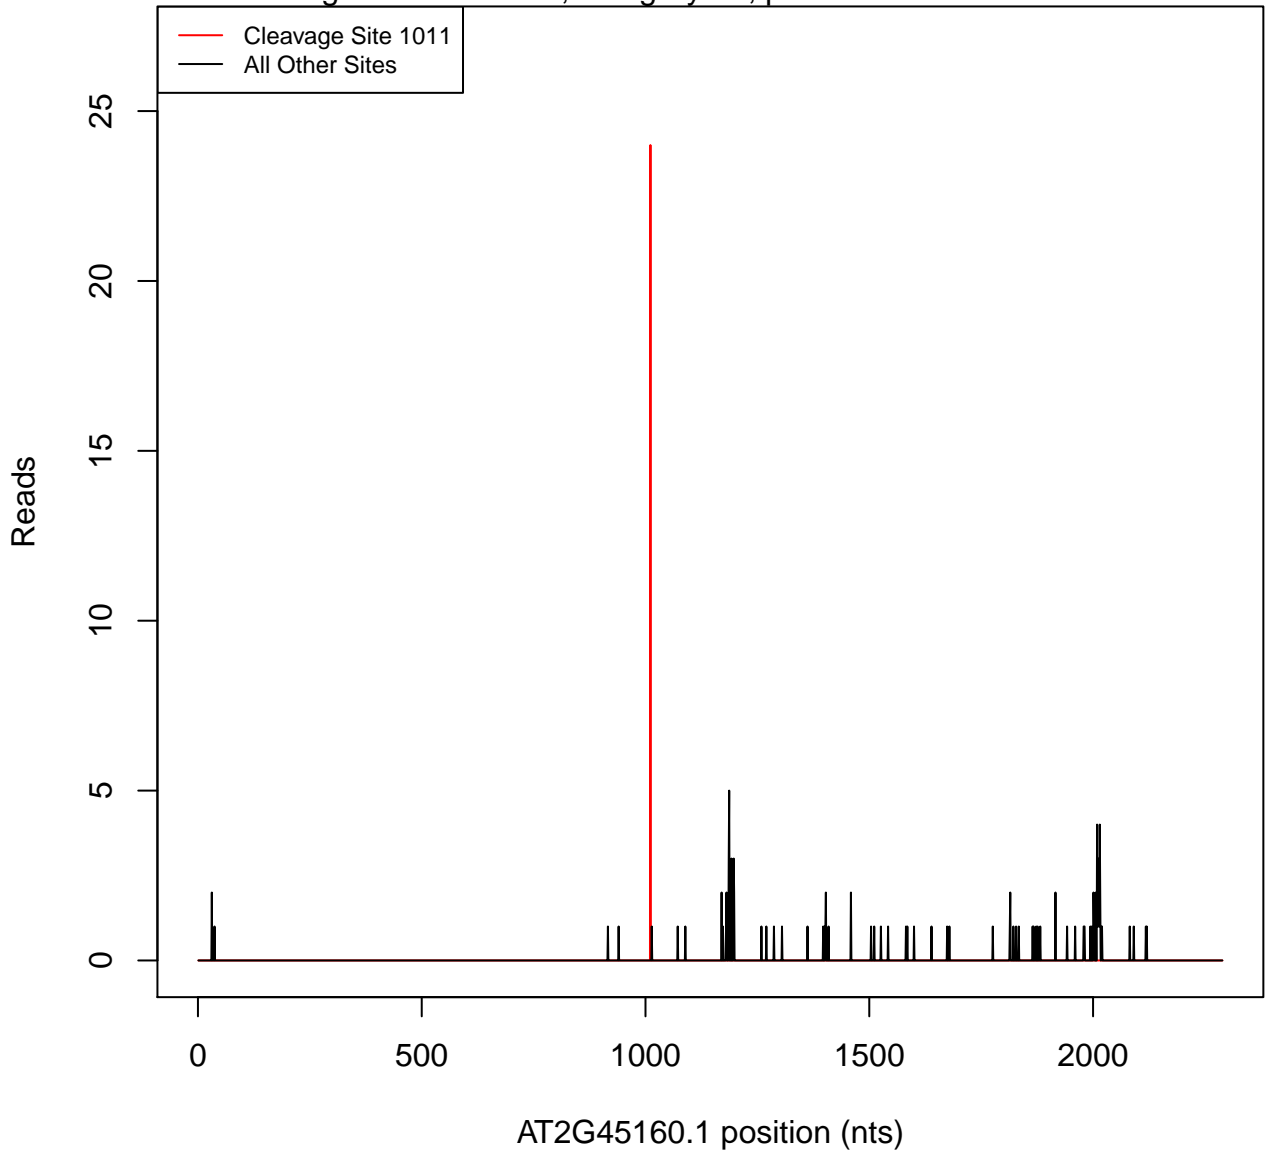



# ahy-miR159\_1ss7TC slicing AT3G11440.1 at nt 1166

alignment score=3.5 , category=0 , p=0.00842137684801048

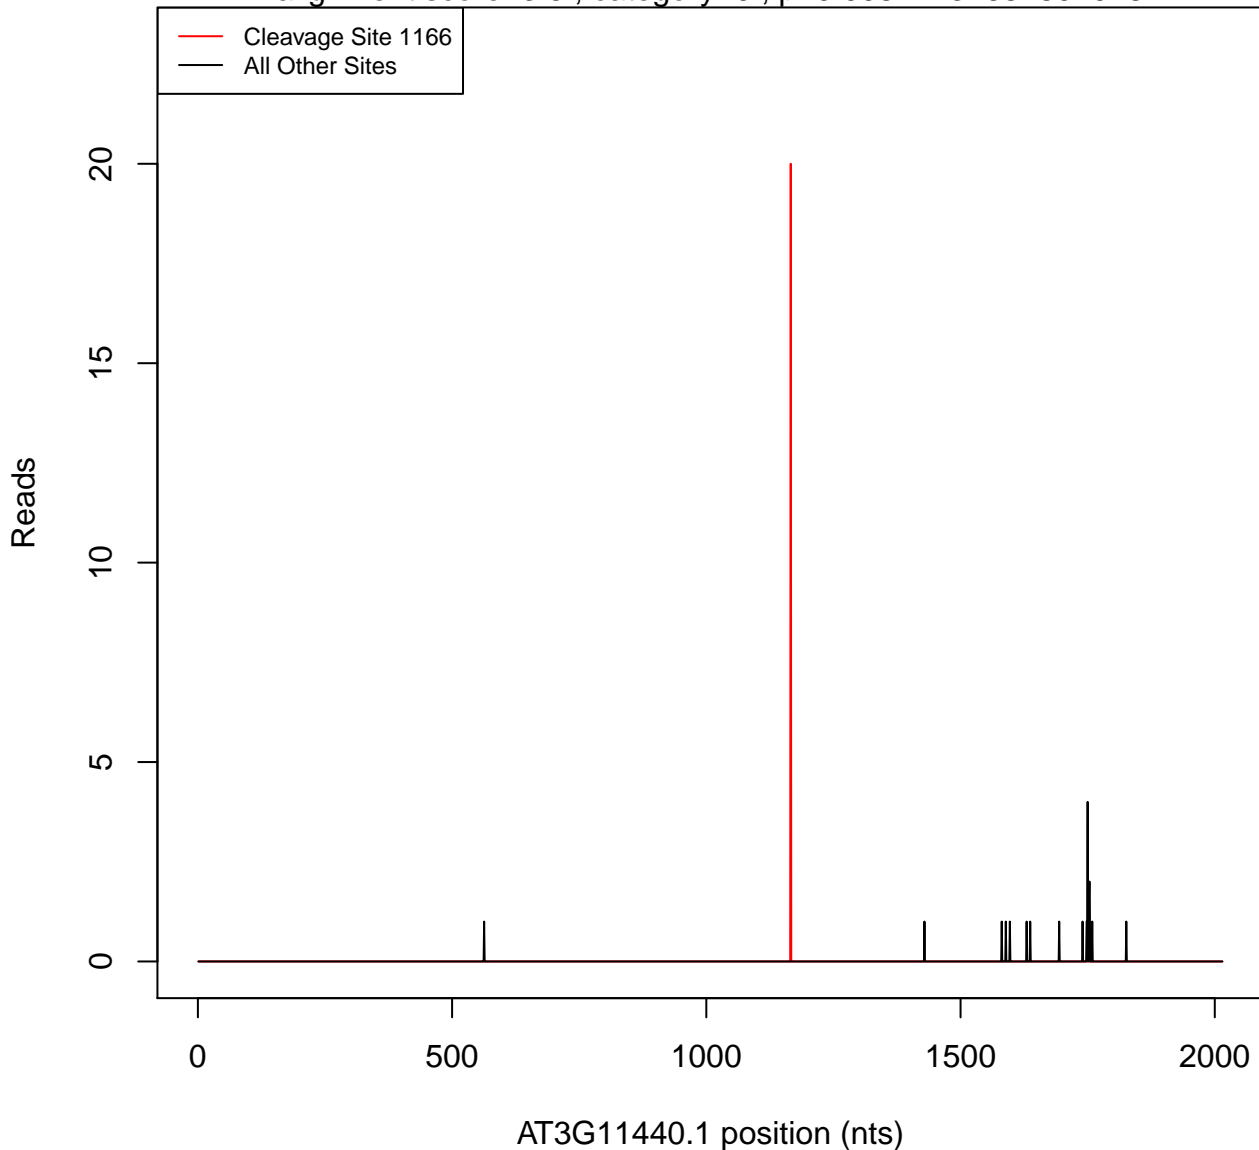

# ath-miR159a slicing AT3G11440.1 at nt 1166

alignment score=3.5 , category=0 , p=0.0100971226825827

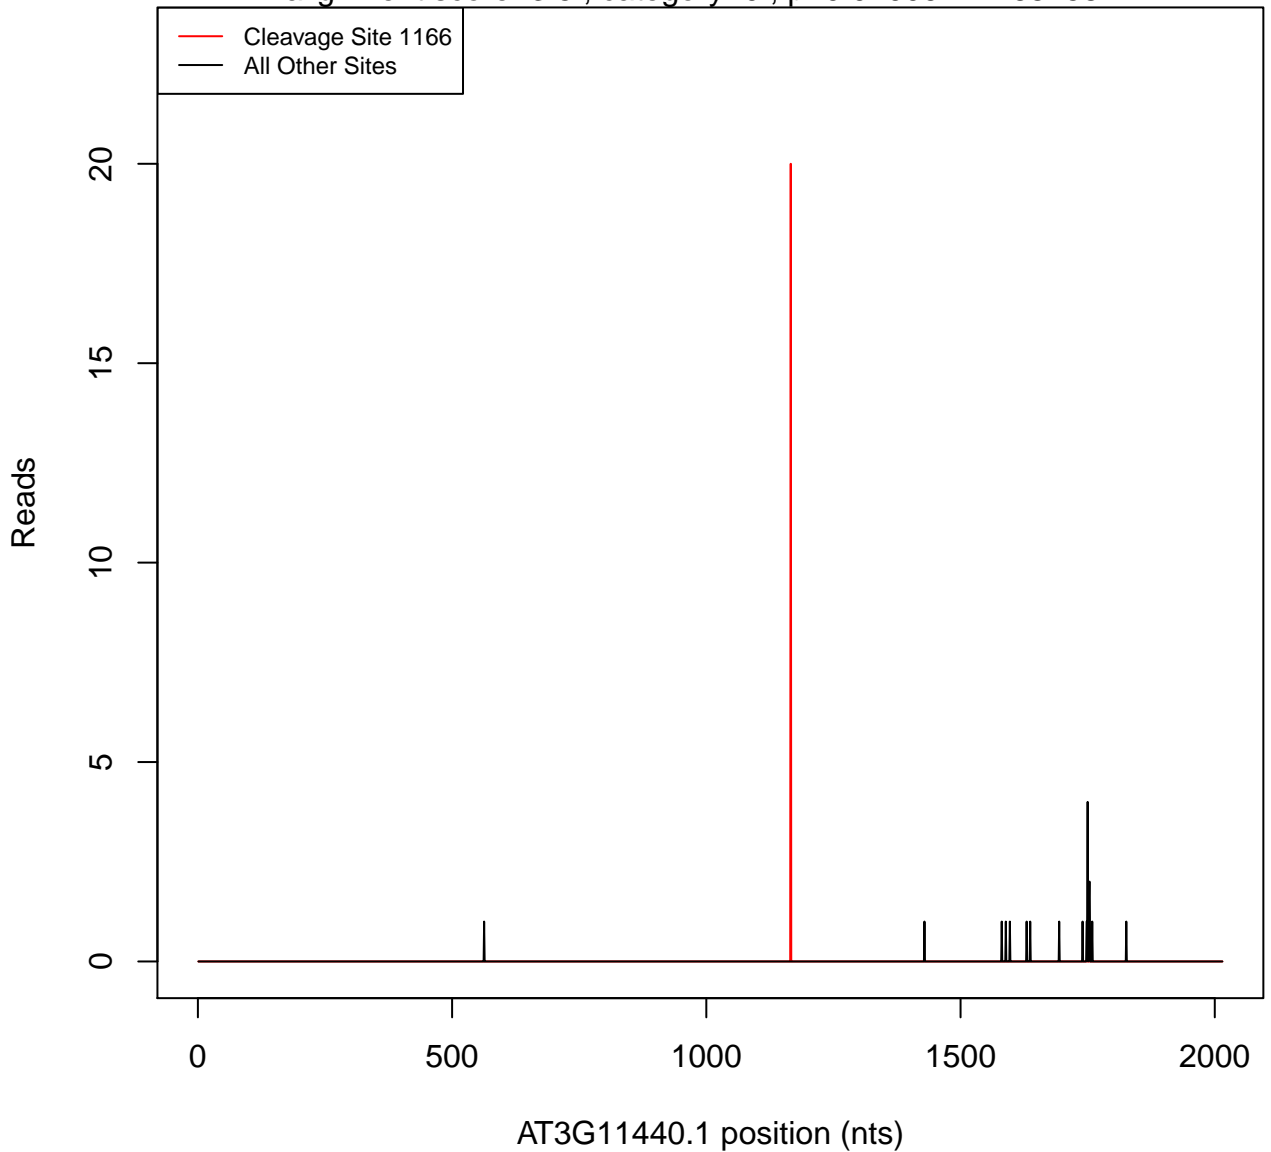

# ath-miR159b\_R-1 slicing AT3G11440.1 at nt 1166

alignment score=3.5 , category=0 , p=0.0184334678554026

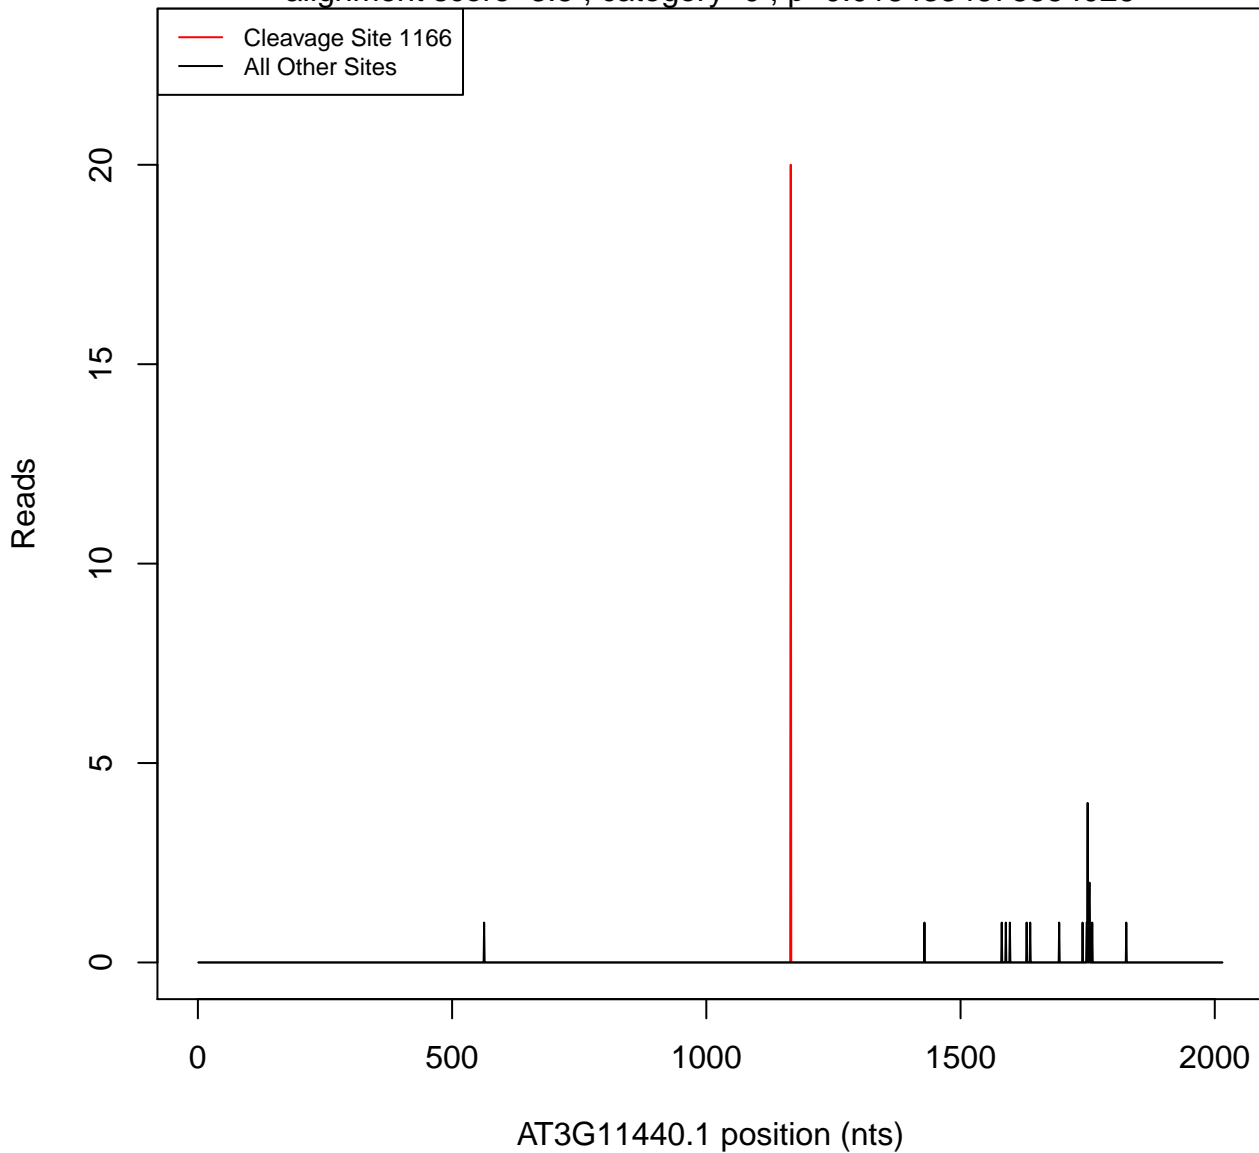

# ath-miR159c slicing AT3G11440.1 at nt 1166

alignment score=4 , category=0 , p=0.0248458179394981

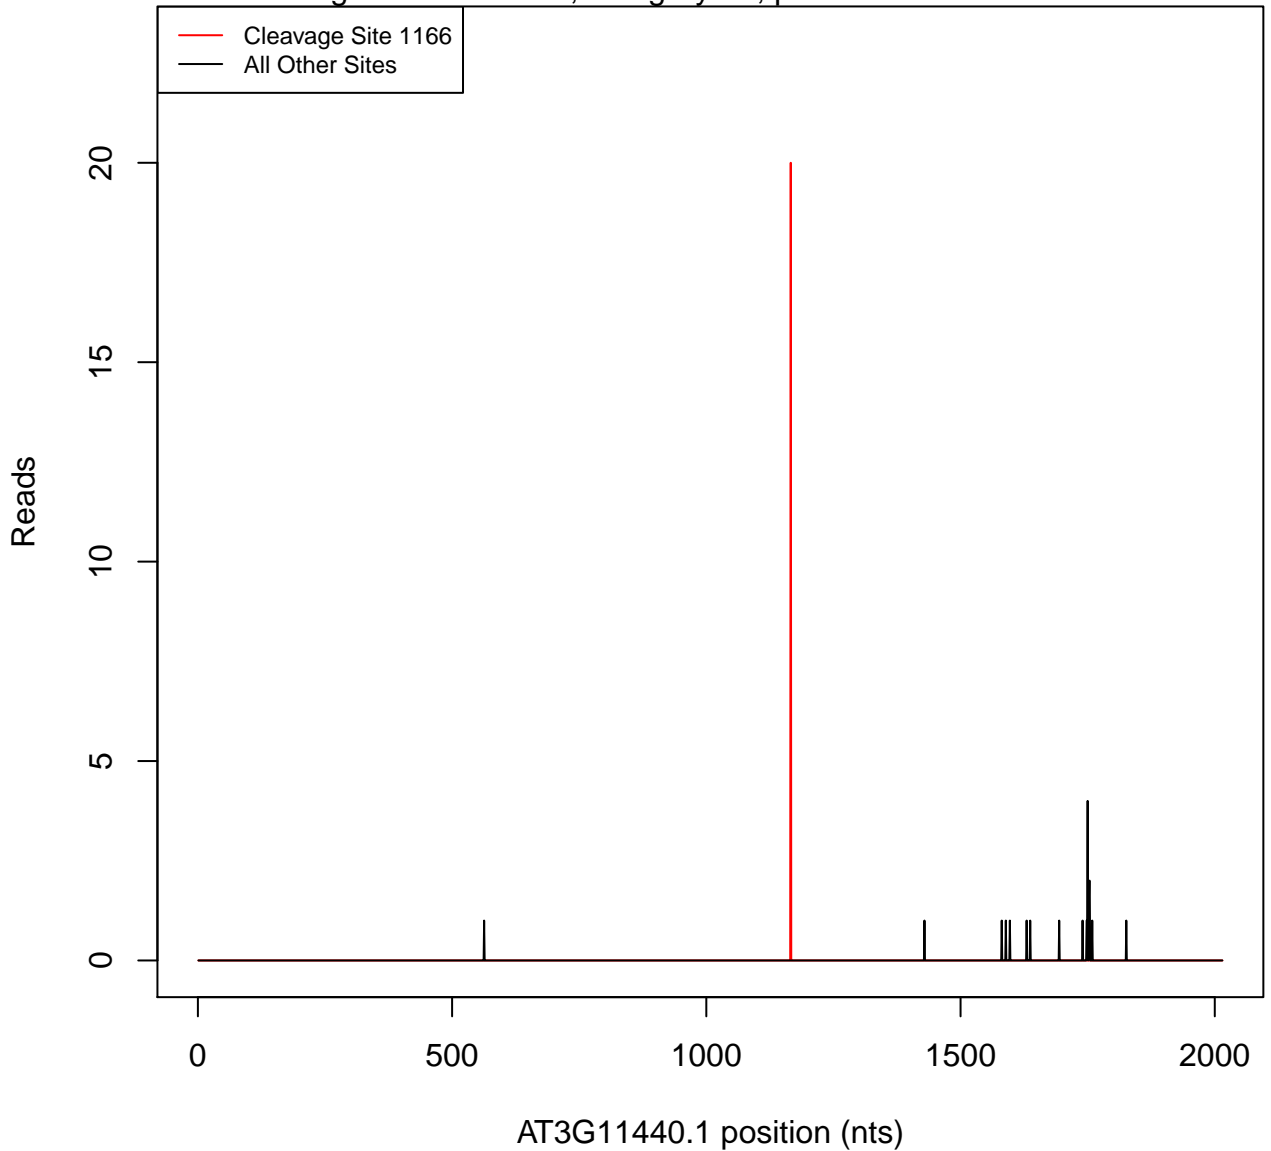

# ath-miR159c\_R-2 slicing AT3G11440.1 at nt 1166

alignment score=3 , category=0 , p=0.0409982057022138

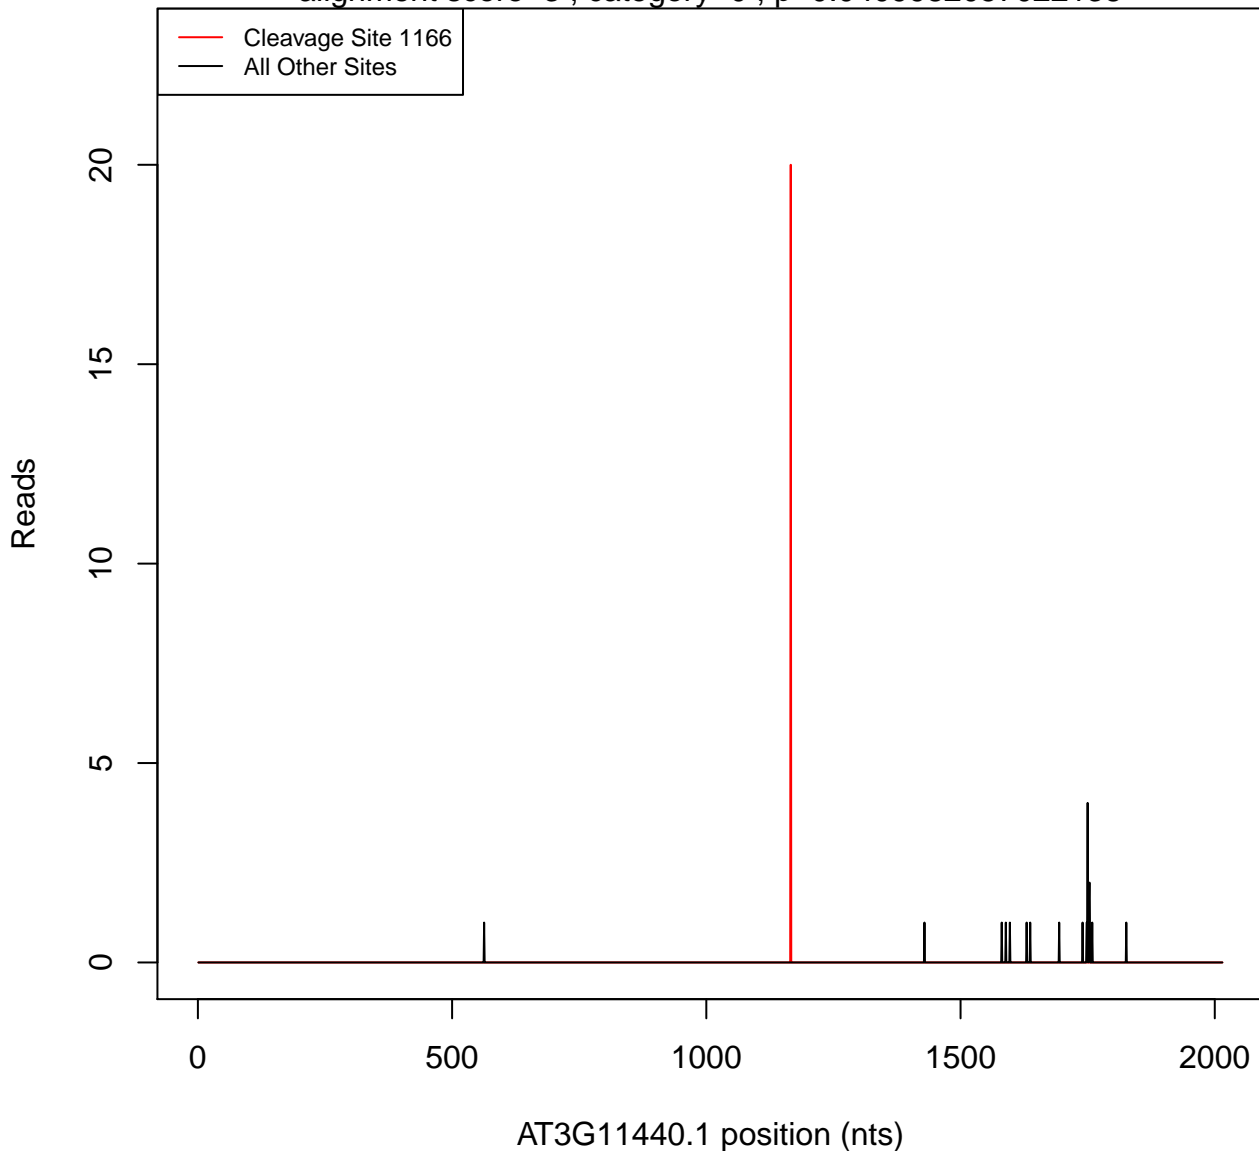

# ath-miR319c\_L+1R-1 slicing AT3G11440.1 at nt 1166

alignment score=4 , category=0 , p=0.0277279705481209

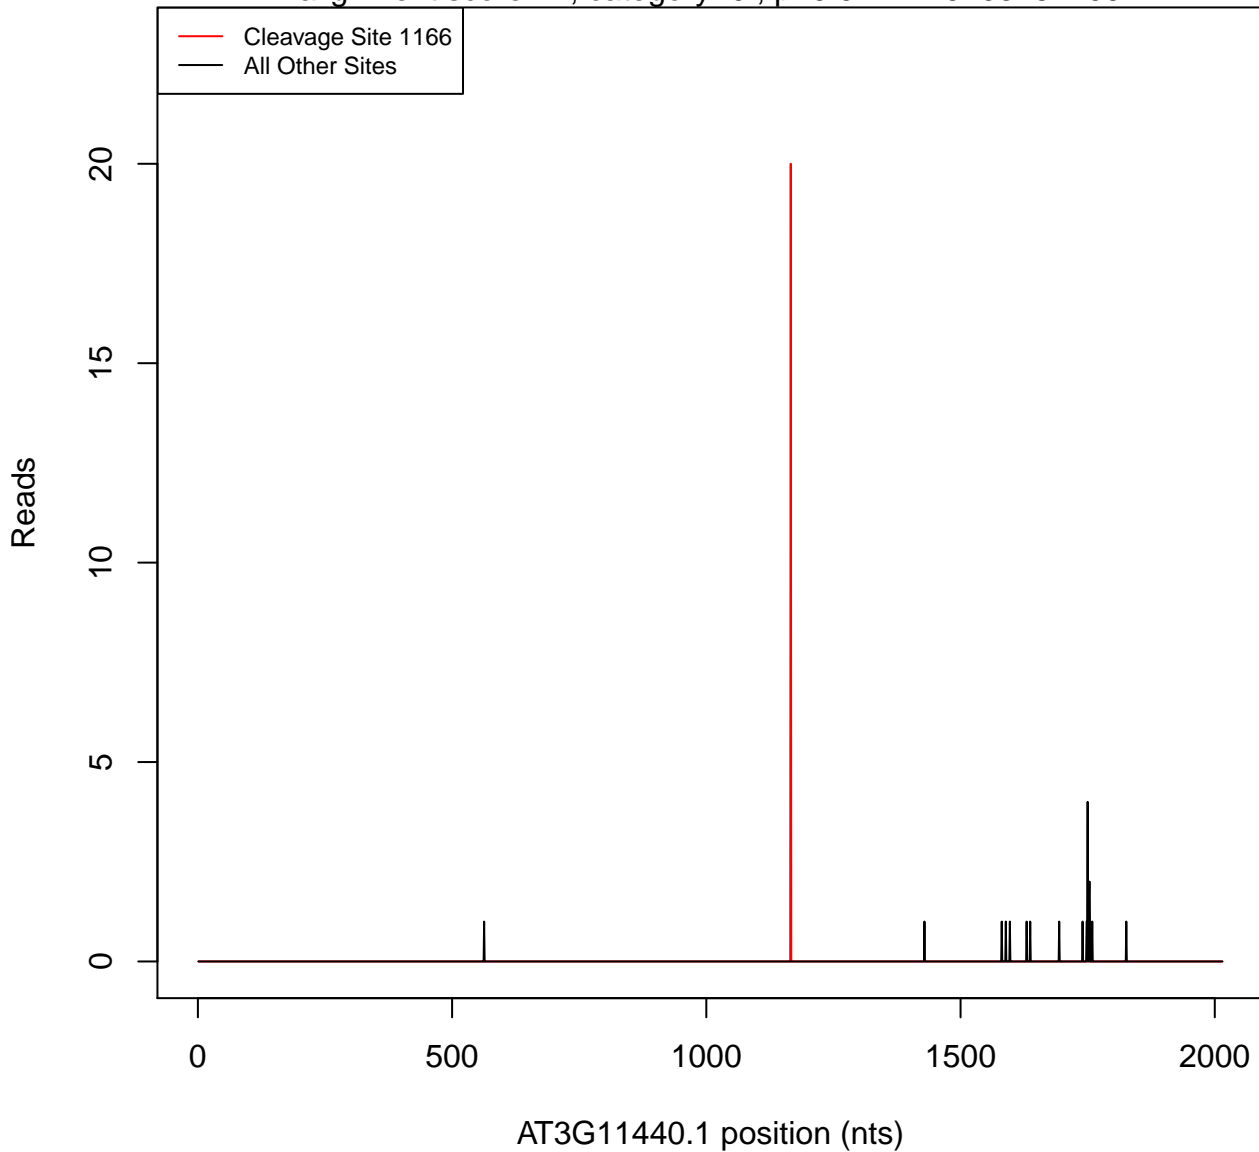

# ath-miR319a slicing AT3G15030.1 at nt 1487

alignment score=3.5 , category=0 , p=0.00674279424614888

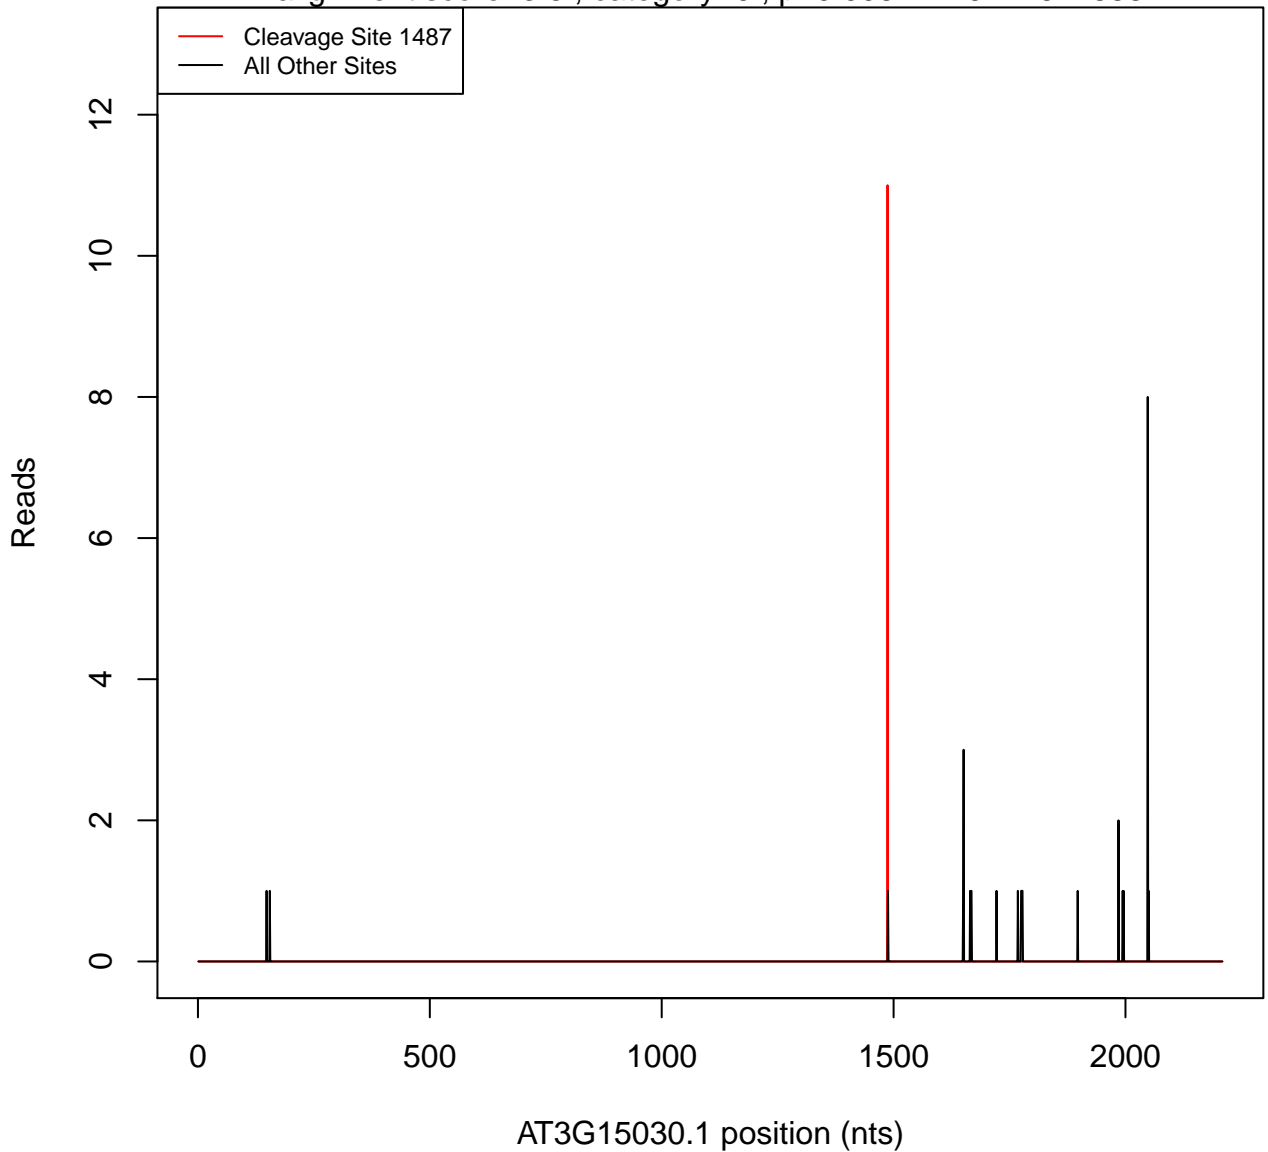

# ath-miR319b slicing AT3G15030.1 at nt 1487

alignment score=3.5 , category=0 , p=0.00674279424614888

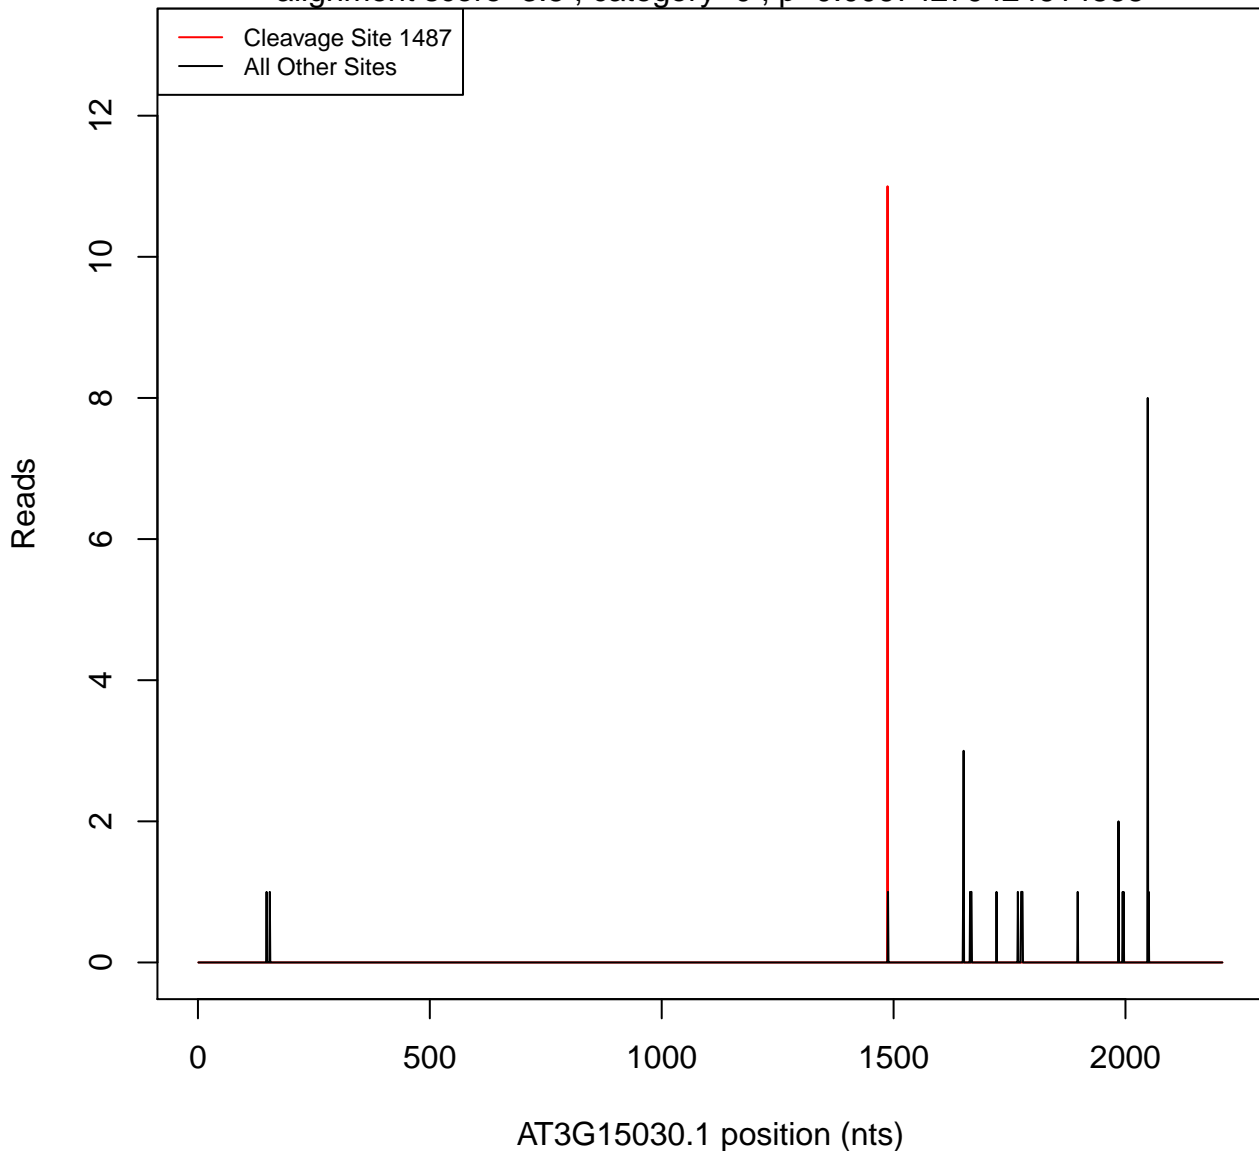



# ath-miR319c slicing AT3G15030.1 at nt 1487

alignment score=3 , category=0 , p=0.00946905012379662

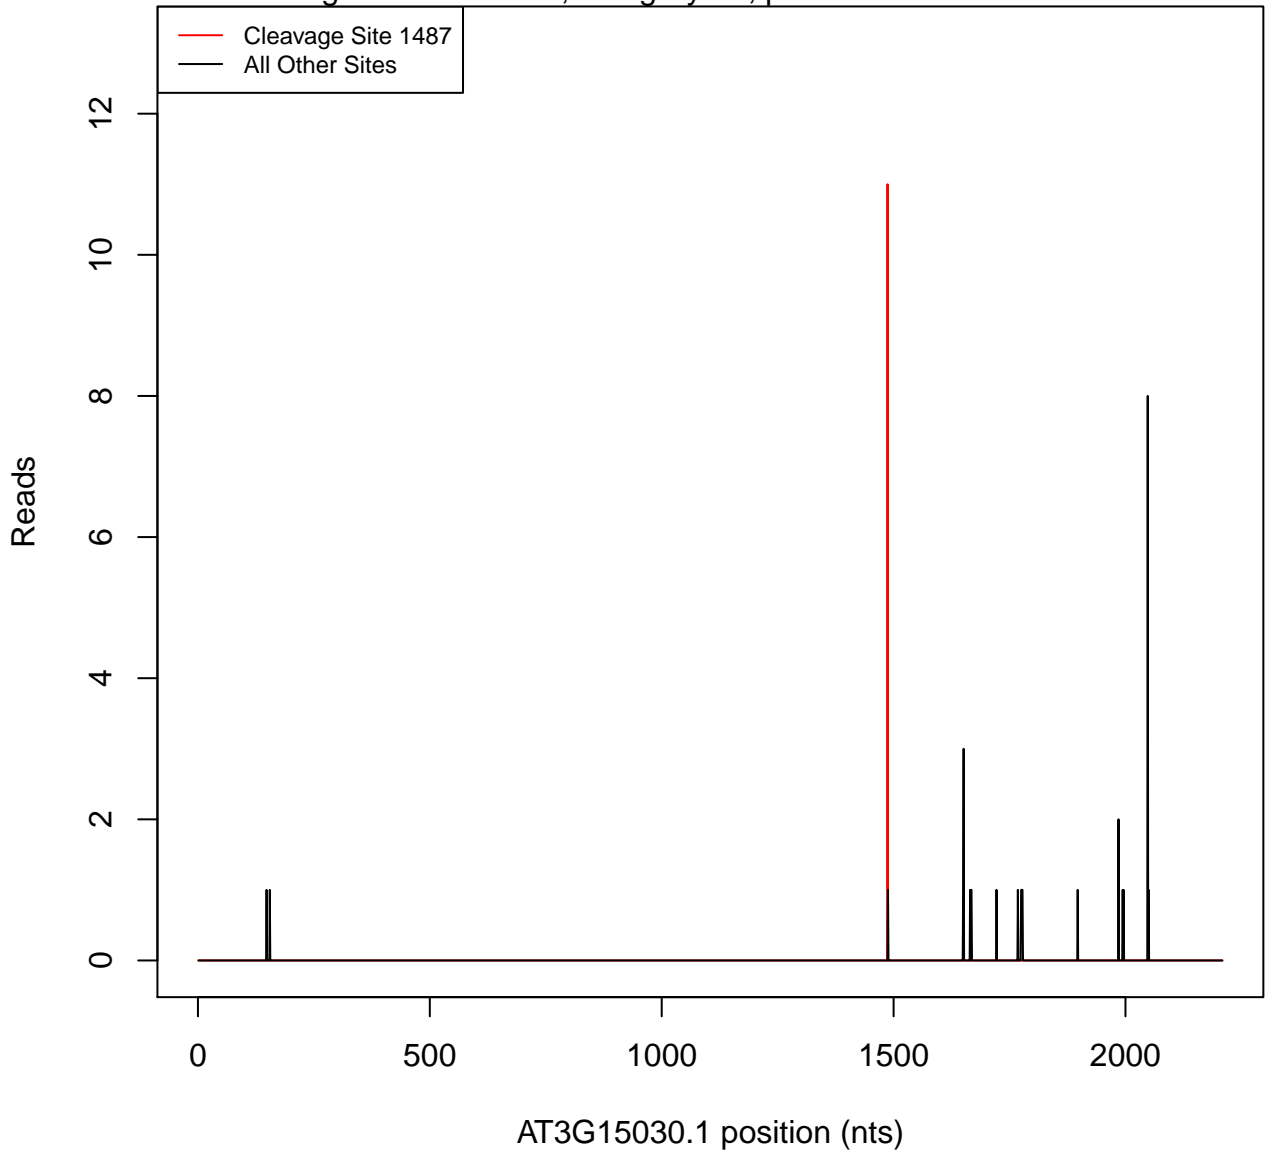

# ptc-miR319i\_R+1\_1ss5GA slicing AT3G15030.1 at nt 1487

alignment score=3.5 , category=0 , p=0.00506137007480845

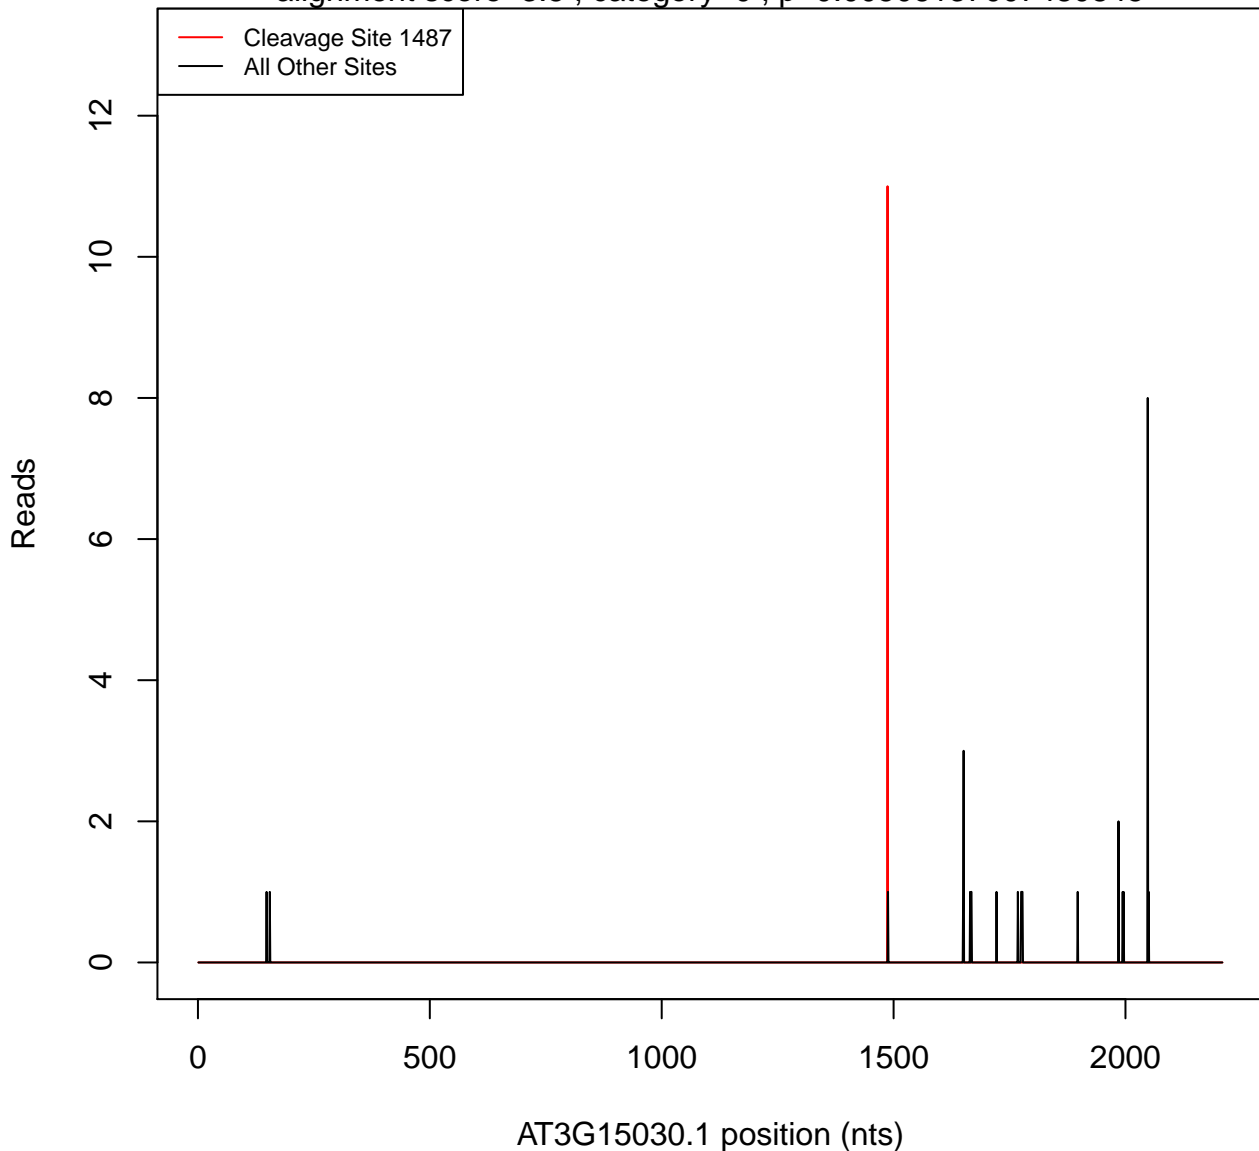

# ath-miR319a slicing AT3G15030.2 at nt 1487

alignment score=3.5 , category=0 , p=0.00674279424614888

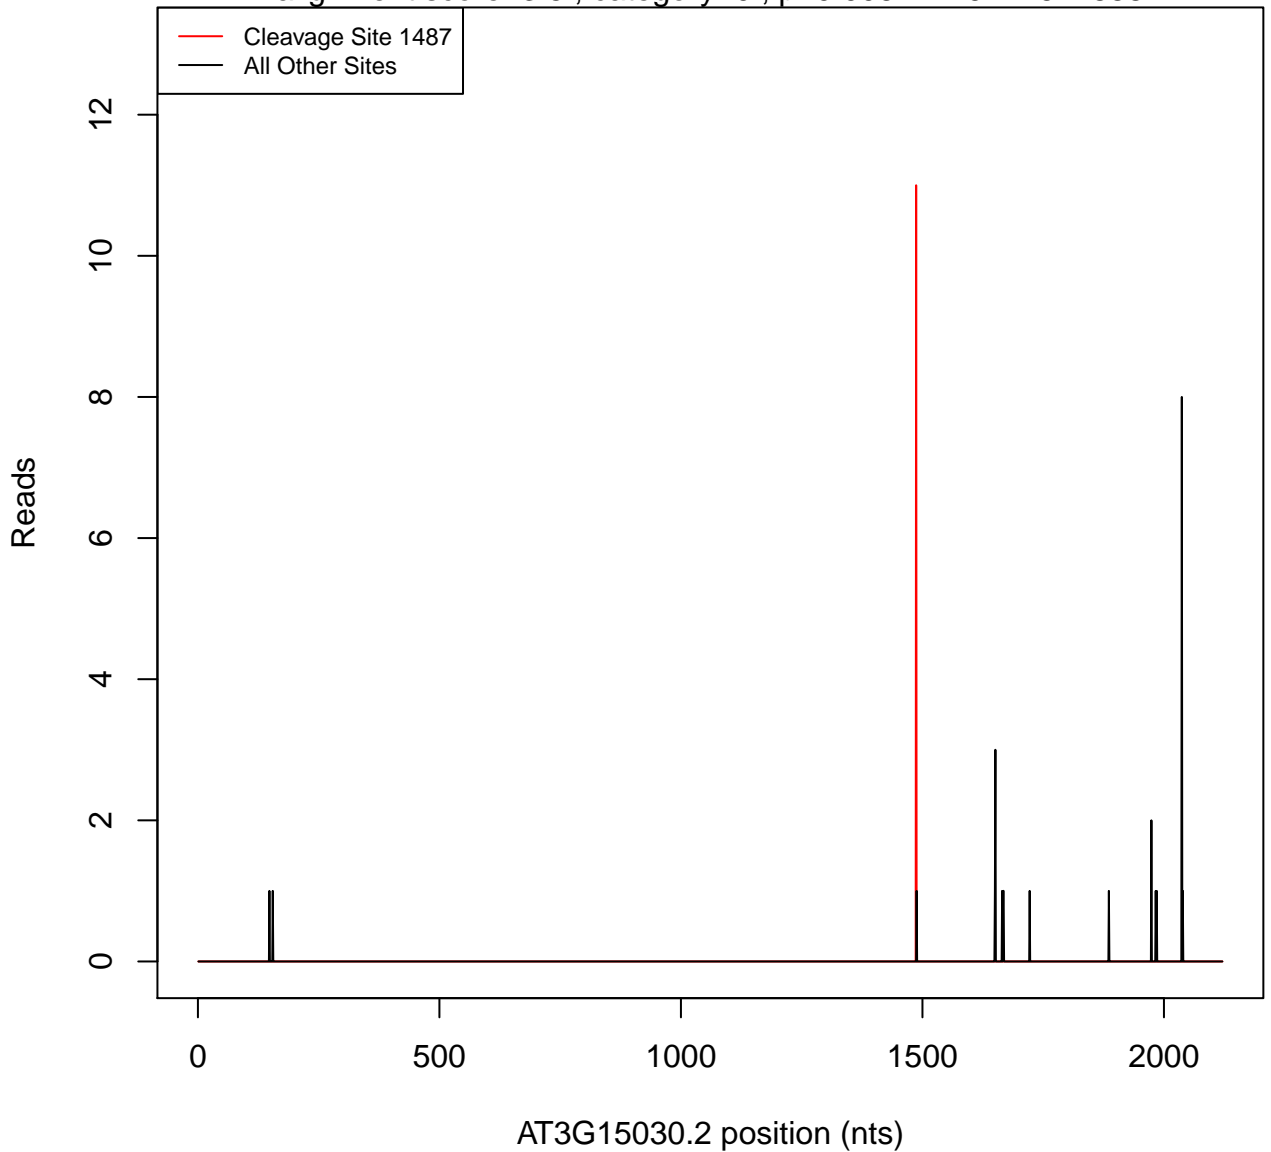

# ath-miR319b slicing AT3G15030.2 at nt 1487

alignment score=3.5 , category=0 , p=0.00674279424614888

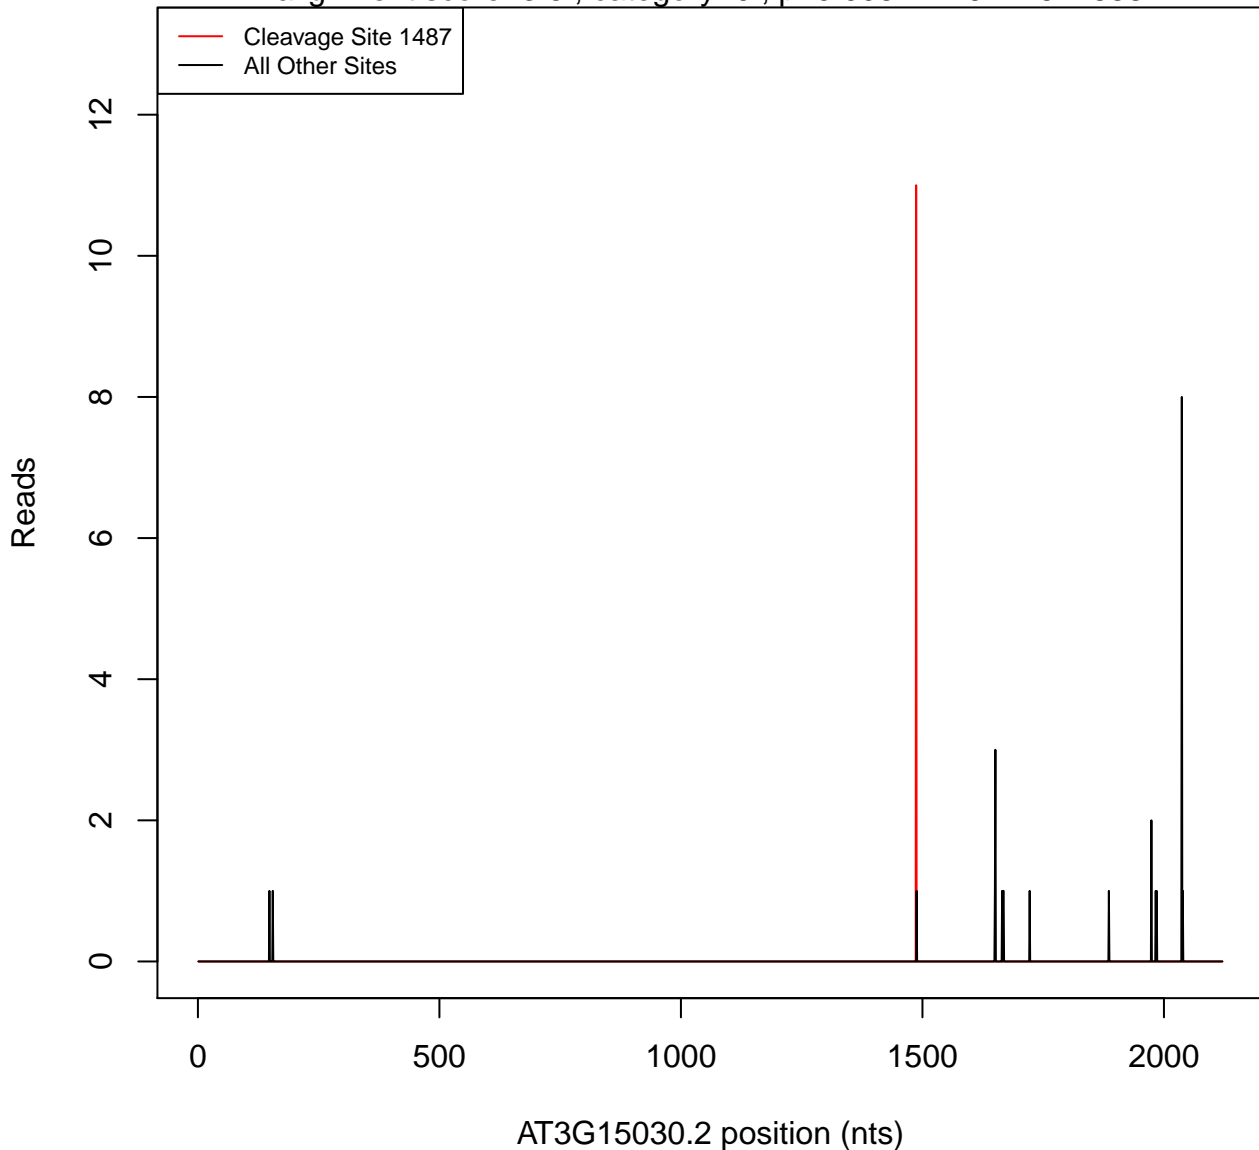

# ath-miR319c slicing AT3G15030.2 at nt 1487

alignment score=3 , category=0 , p=0.00946905012379662

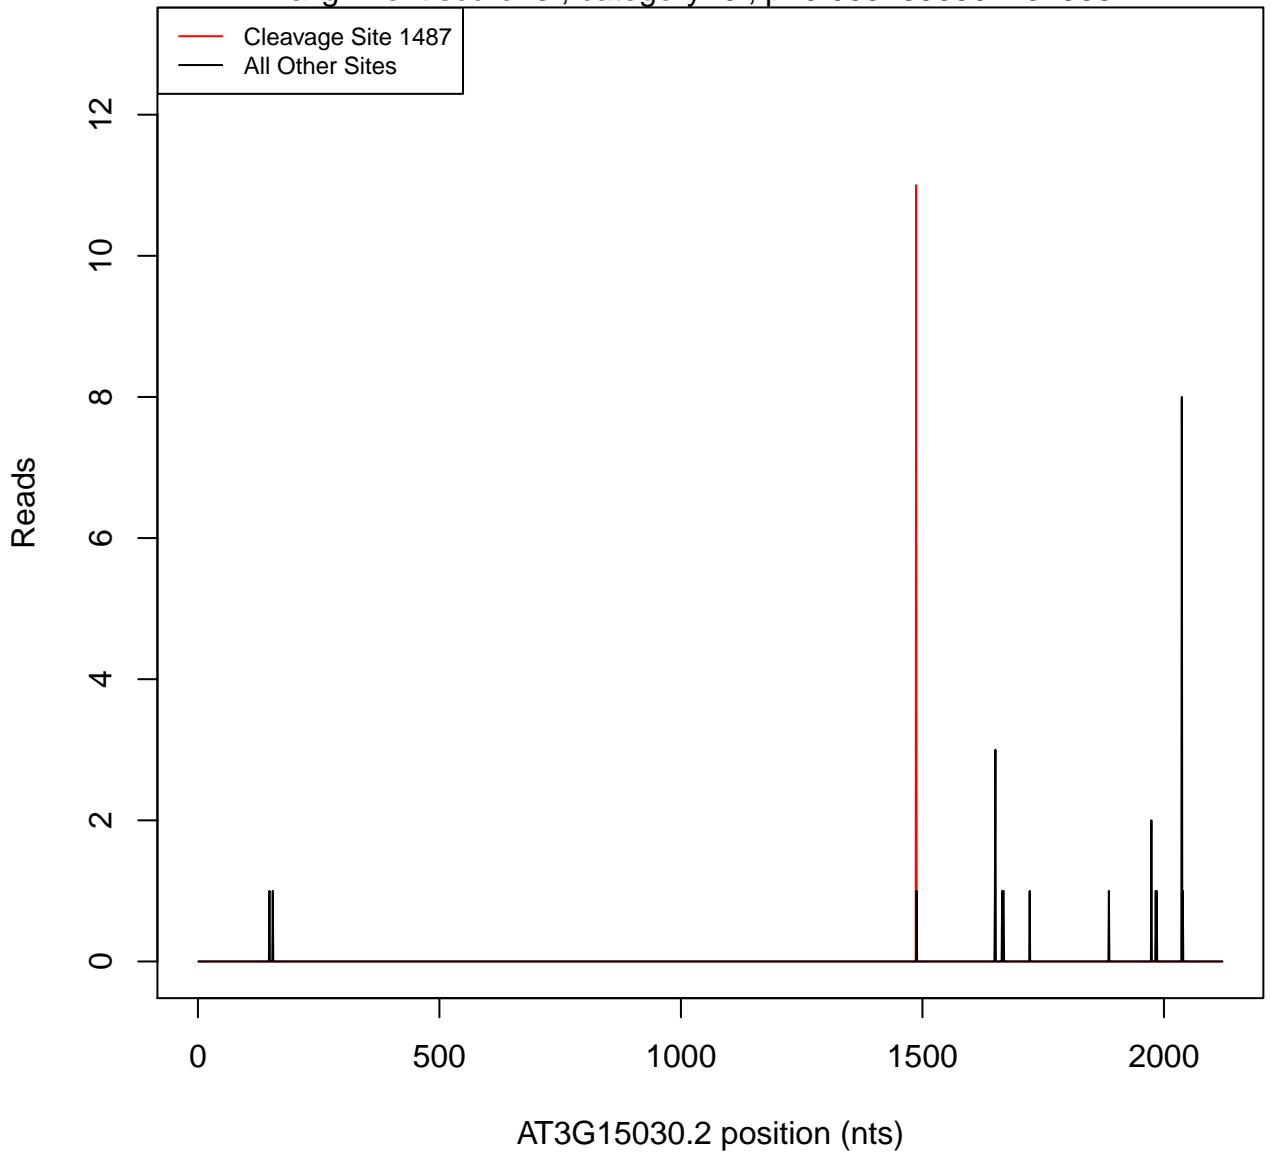

# ptc-miR319i\_R+1\_1ss5GA slicing AT3G15030.2 at nt 1487

alignment score=3.5 , category=0 , p=0.00506137007480845

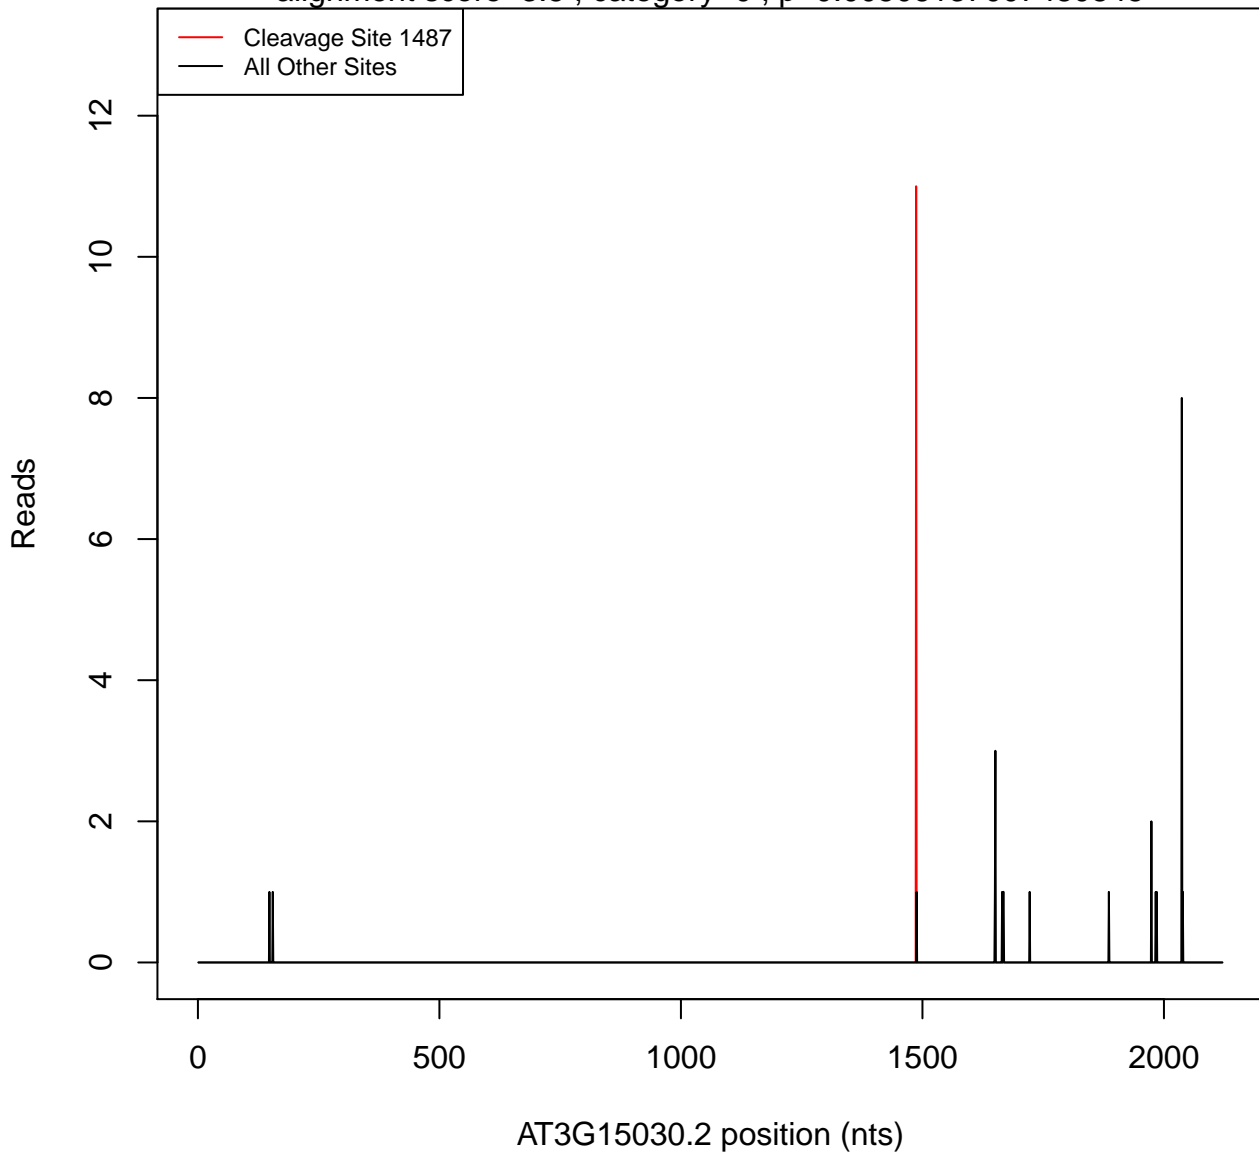

# ath-miR319a slicing AT3G15030.3 at nt 1311

alignment score=3.5 , category=0 , p=0.00674279424614888

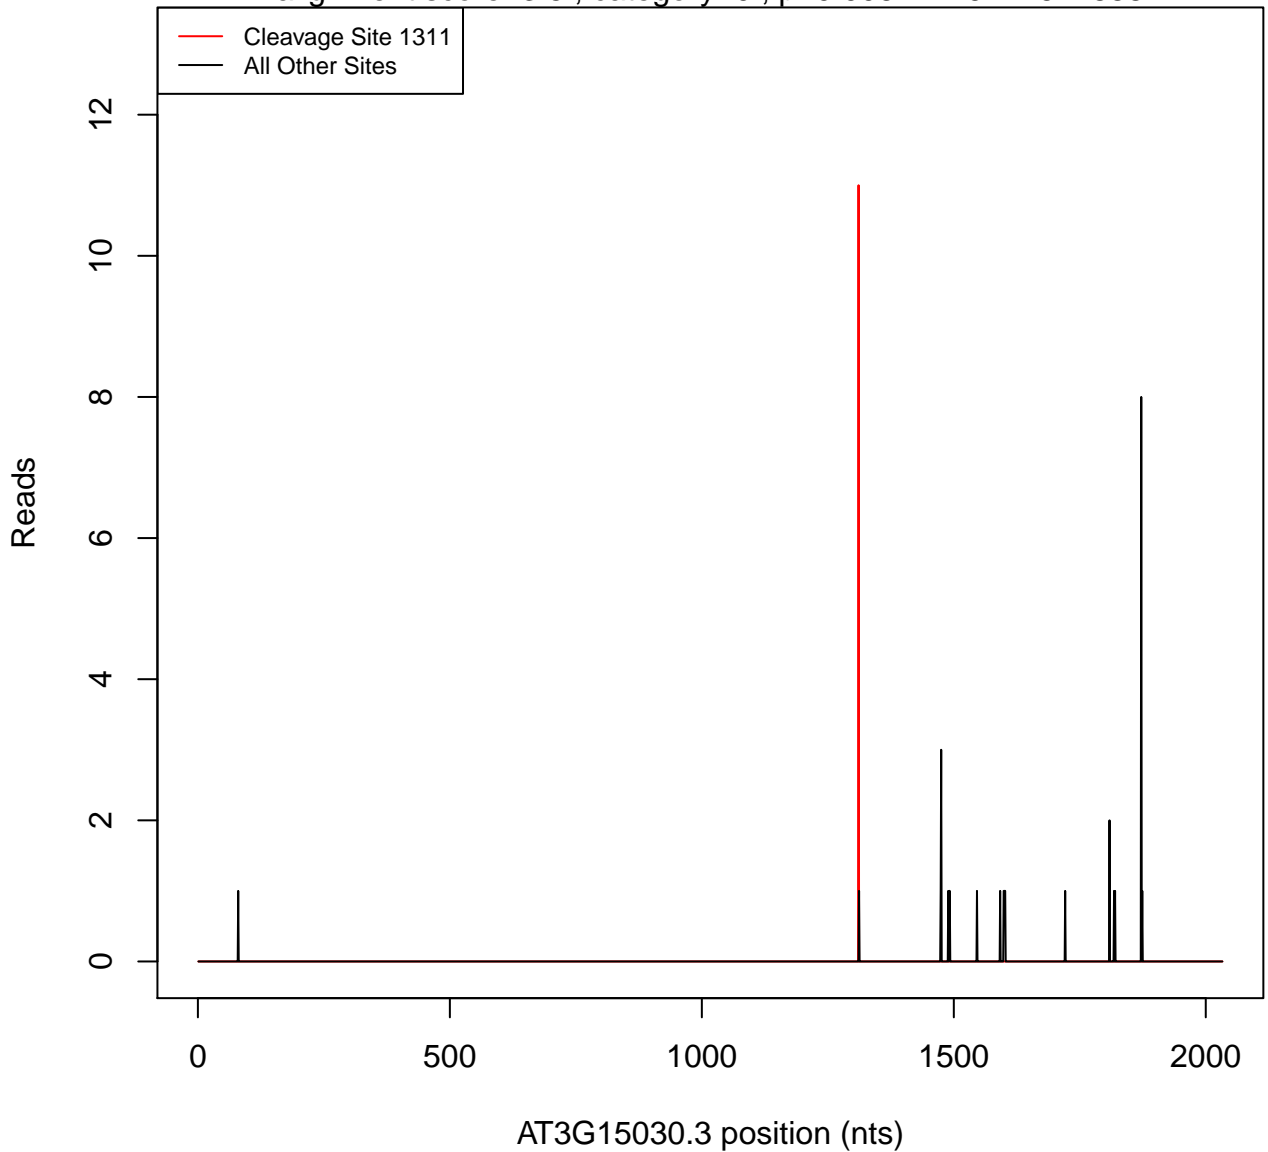

# ath-miR319b slicing AT3G15030.3 at nt 1311

alignment score=3.5 , category=0 , p=0.00674279424614888

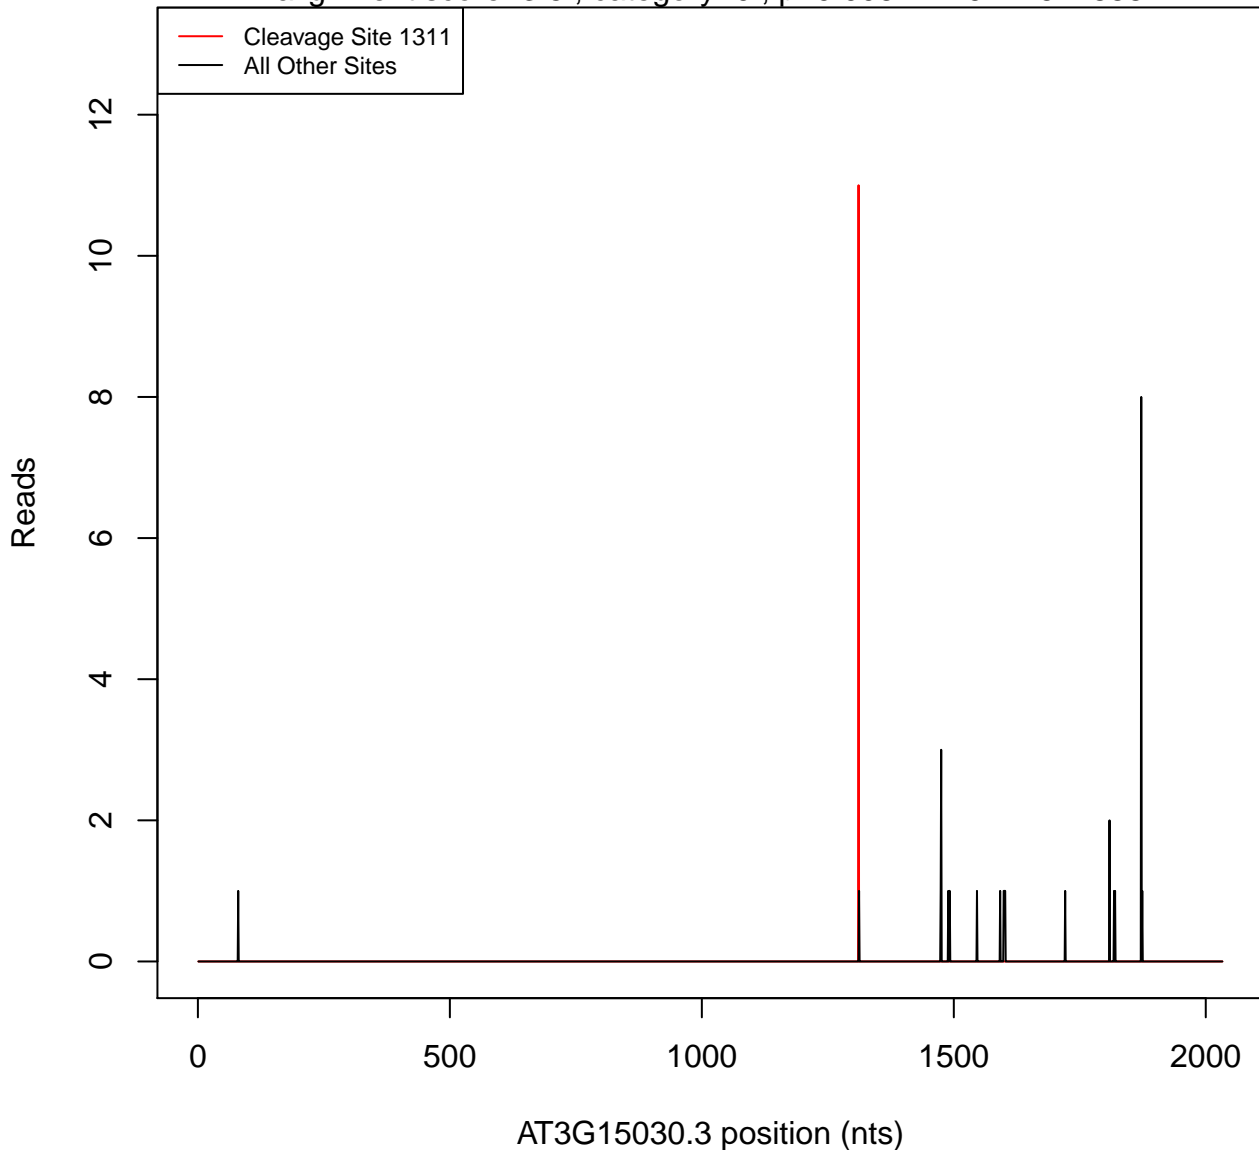



# ath-miR319c slicing AT3G15030.3 at nt 1311

alignment score=3 , category=0 , p=0.00946905012379662

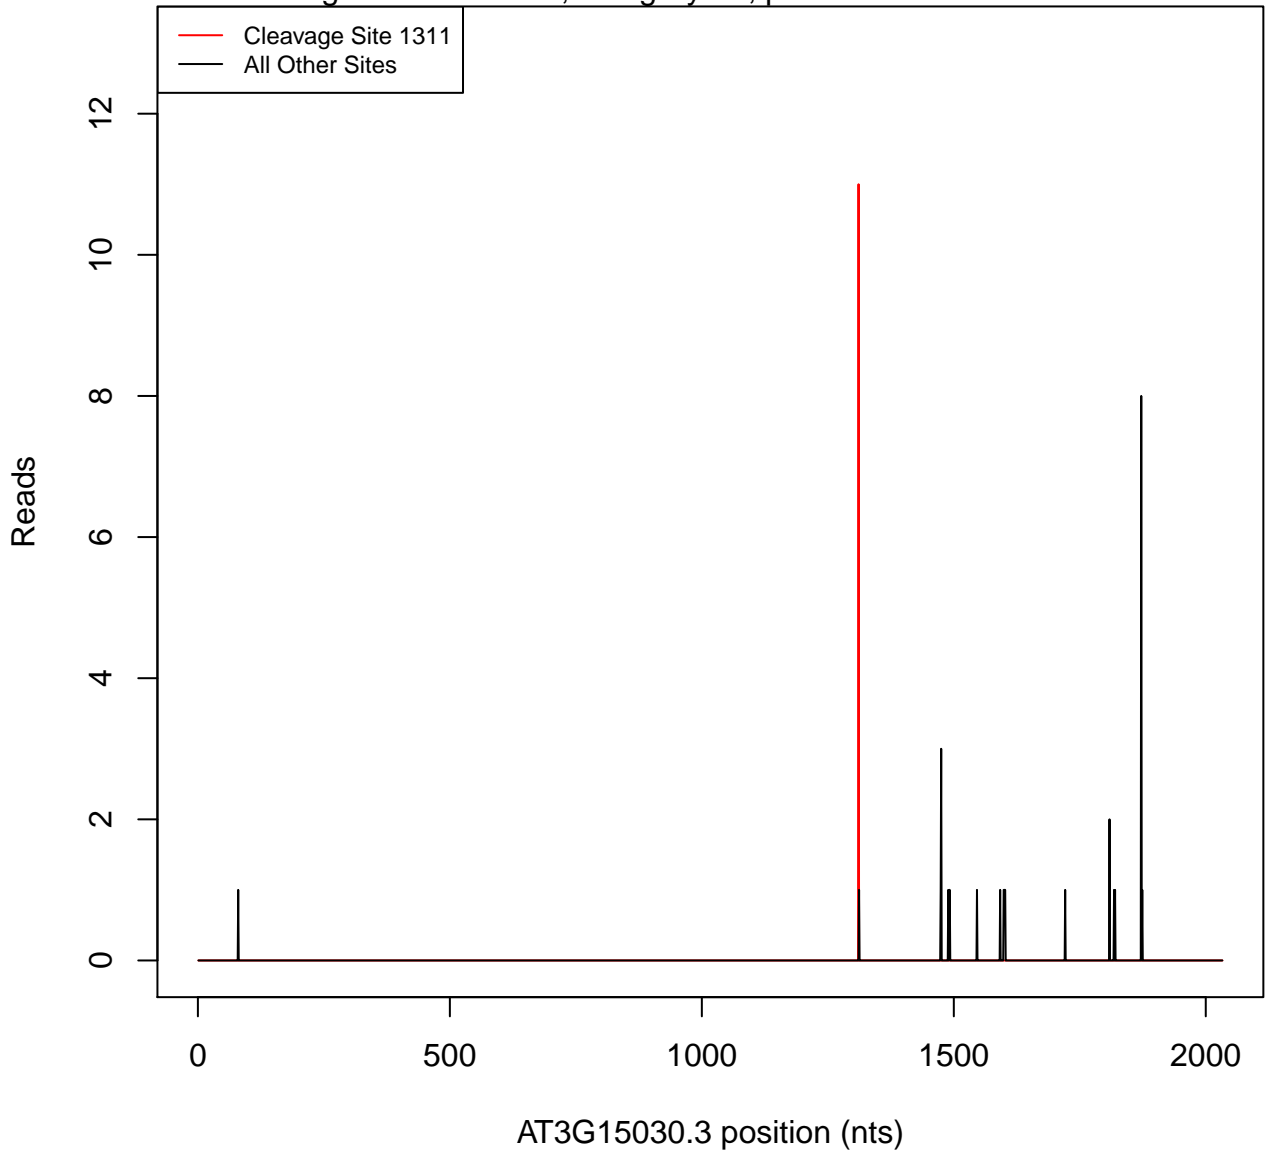

# ptc-miR319i\_R+1\_1ss5GA slicing AT3G15030.3 at nt 1311

alignment score=3.5 , category=0 , p=0.00506137007480845

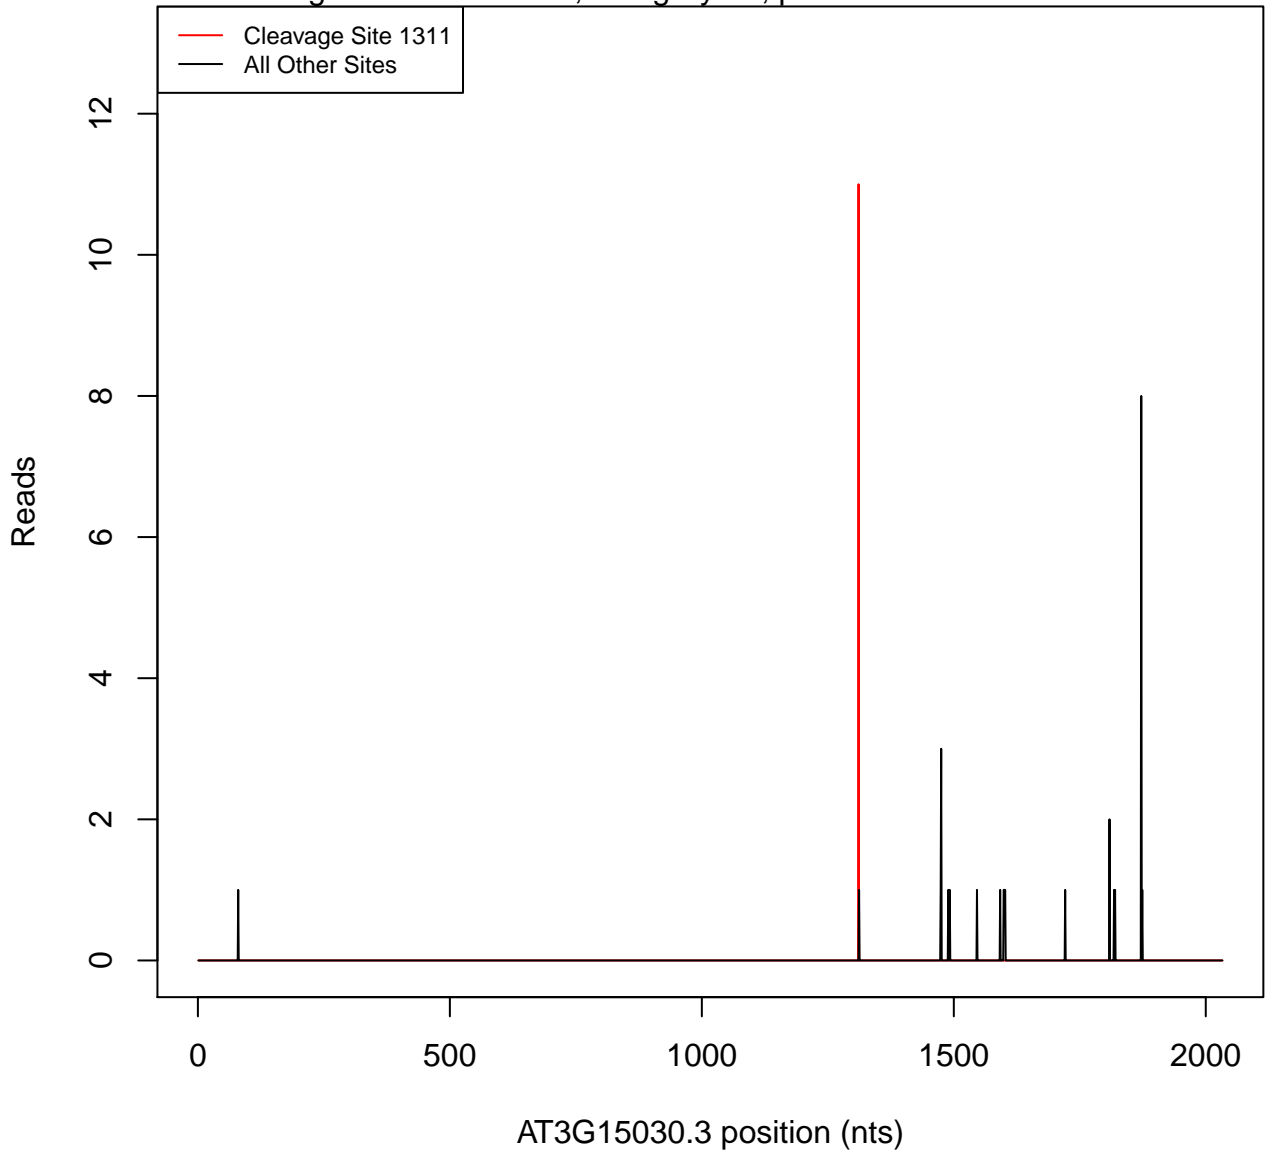

# ath-miR164a slicing AT3G15170.1 at nt 675

alignment score=3 , category=0 , p=0.00379843427293158

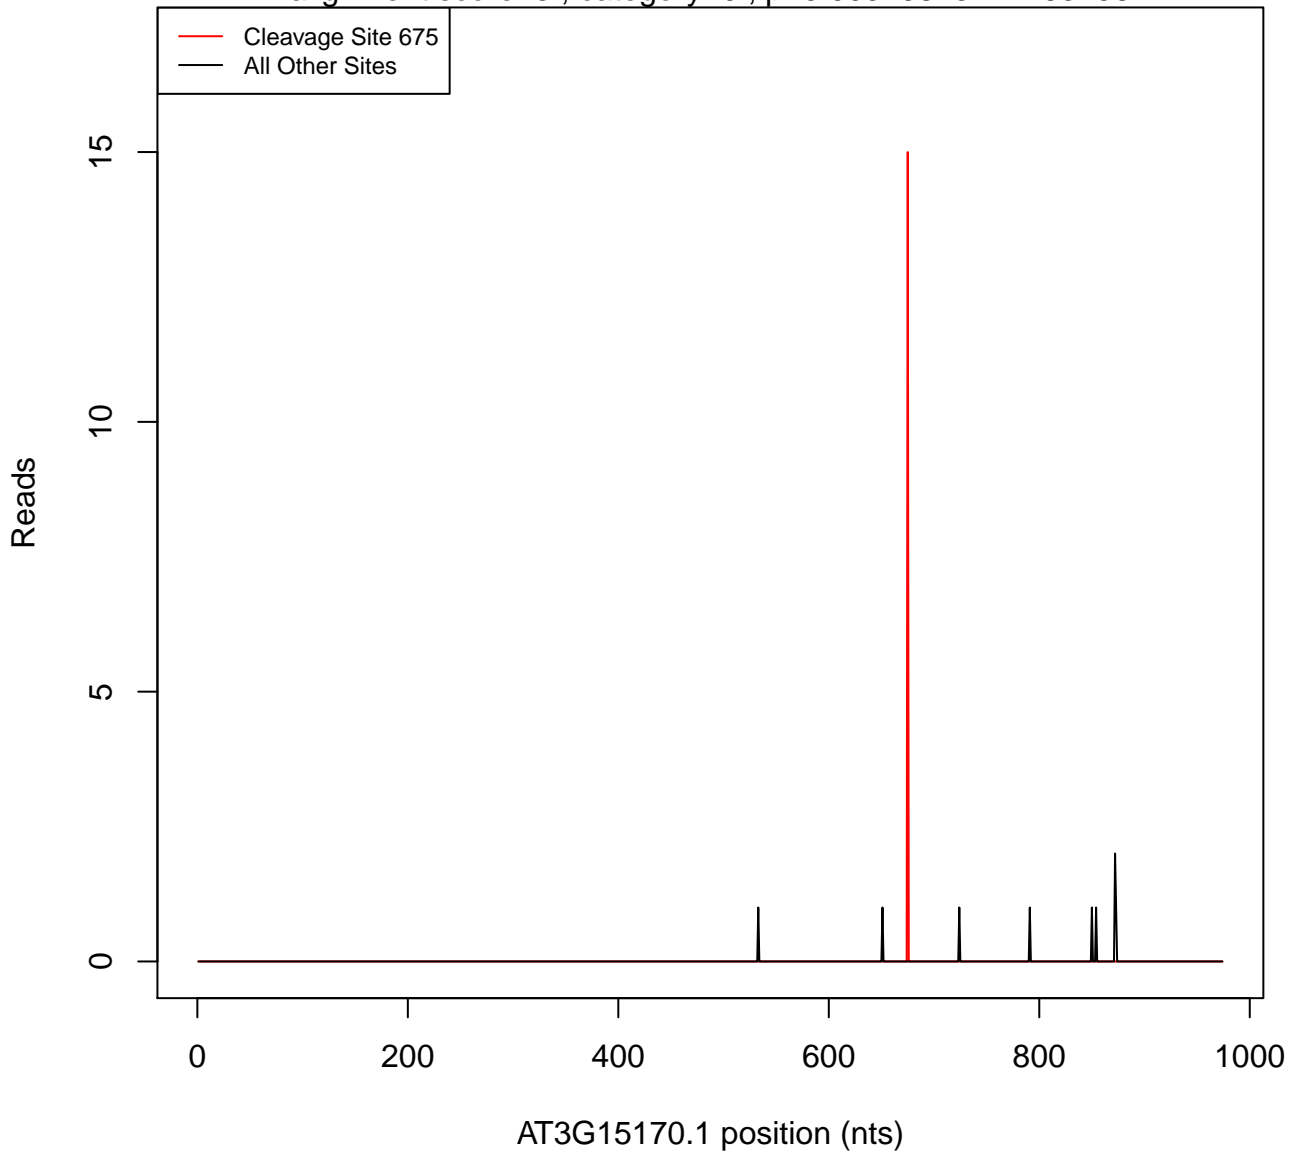

# ath-miR164b slicing AT3G15170.1 at nt 675

alignment score=3 , category=0 , p=0.00379843427293158

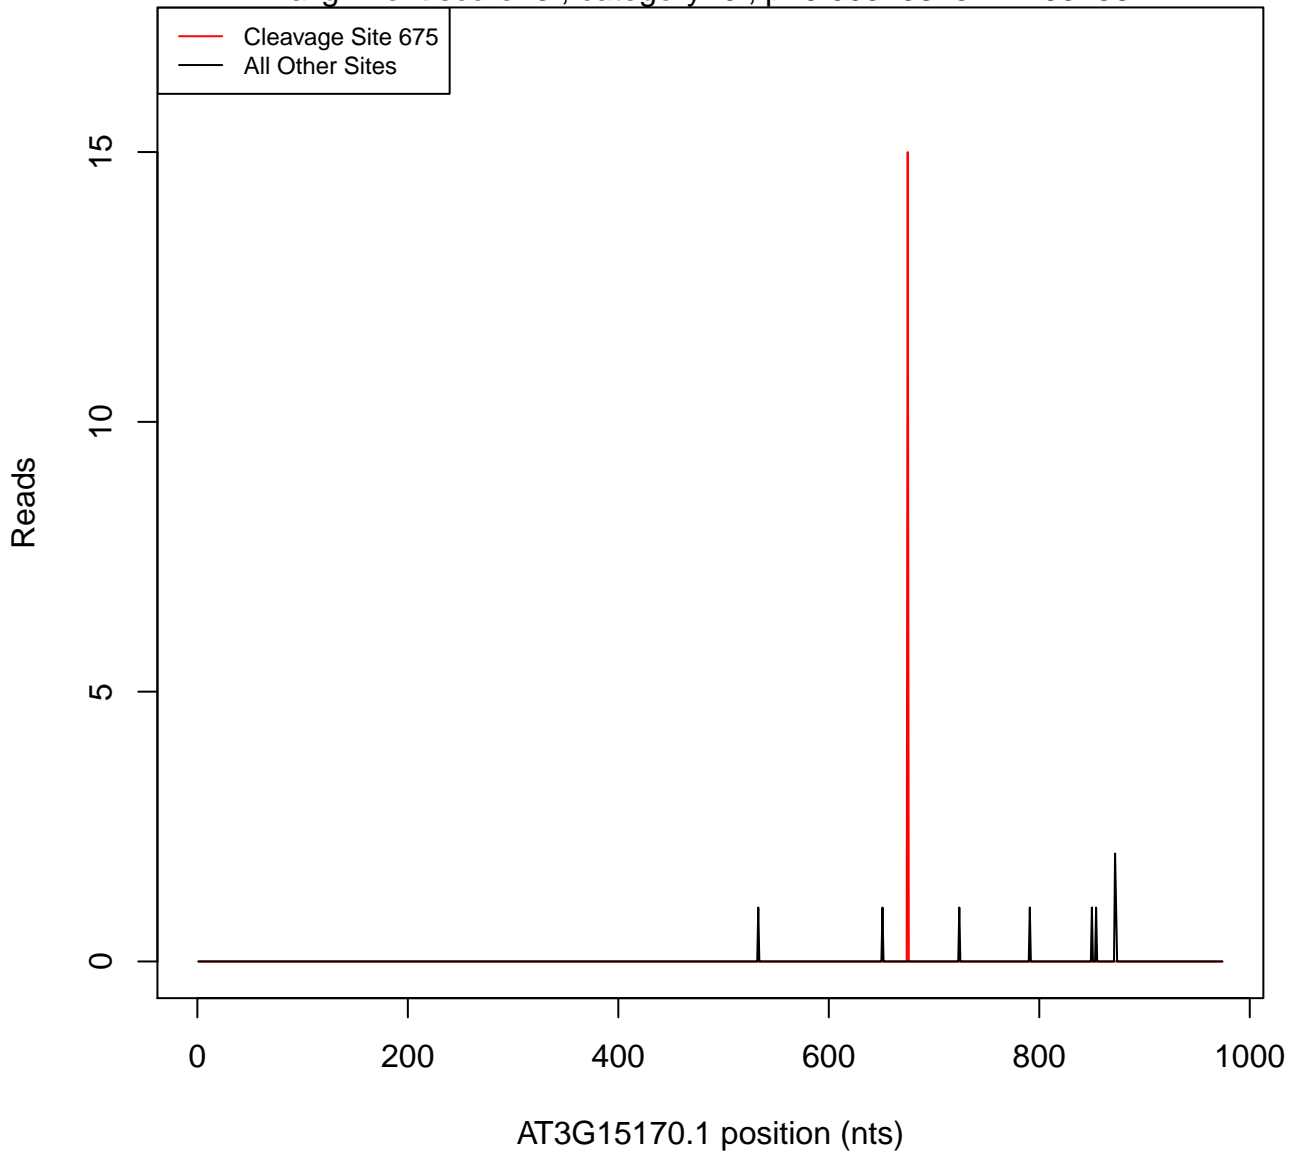

# ath-miR164c slicing AT3G15170.1 at nt 675

alignment score=3 , category=0 , p=0.00379843427293158

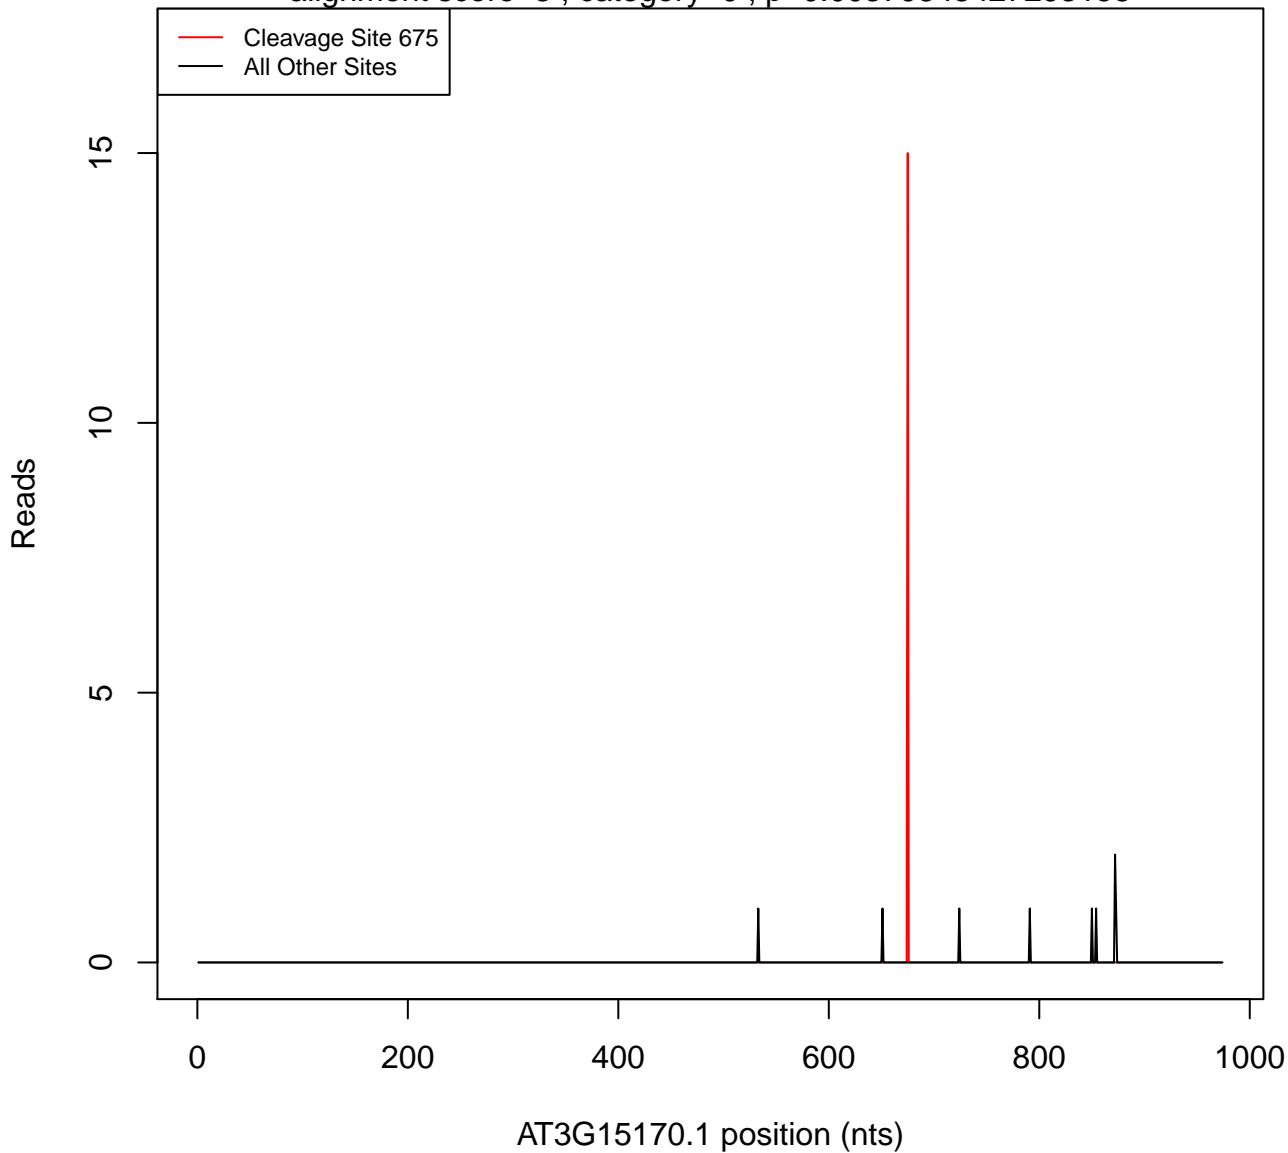

# ath-miR156a slicing AT3G15270.1 at nt 655

alignment score=3 , category=0 , p=0.0113520733142178

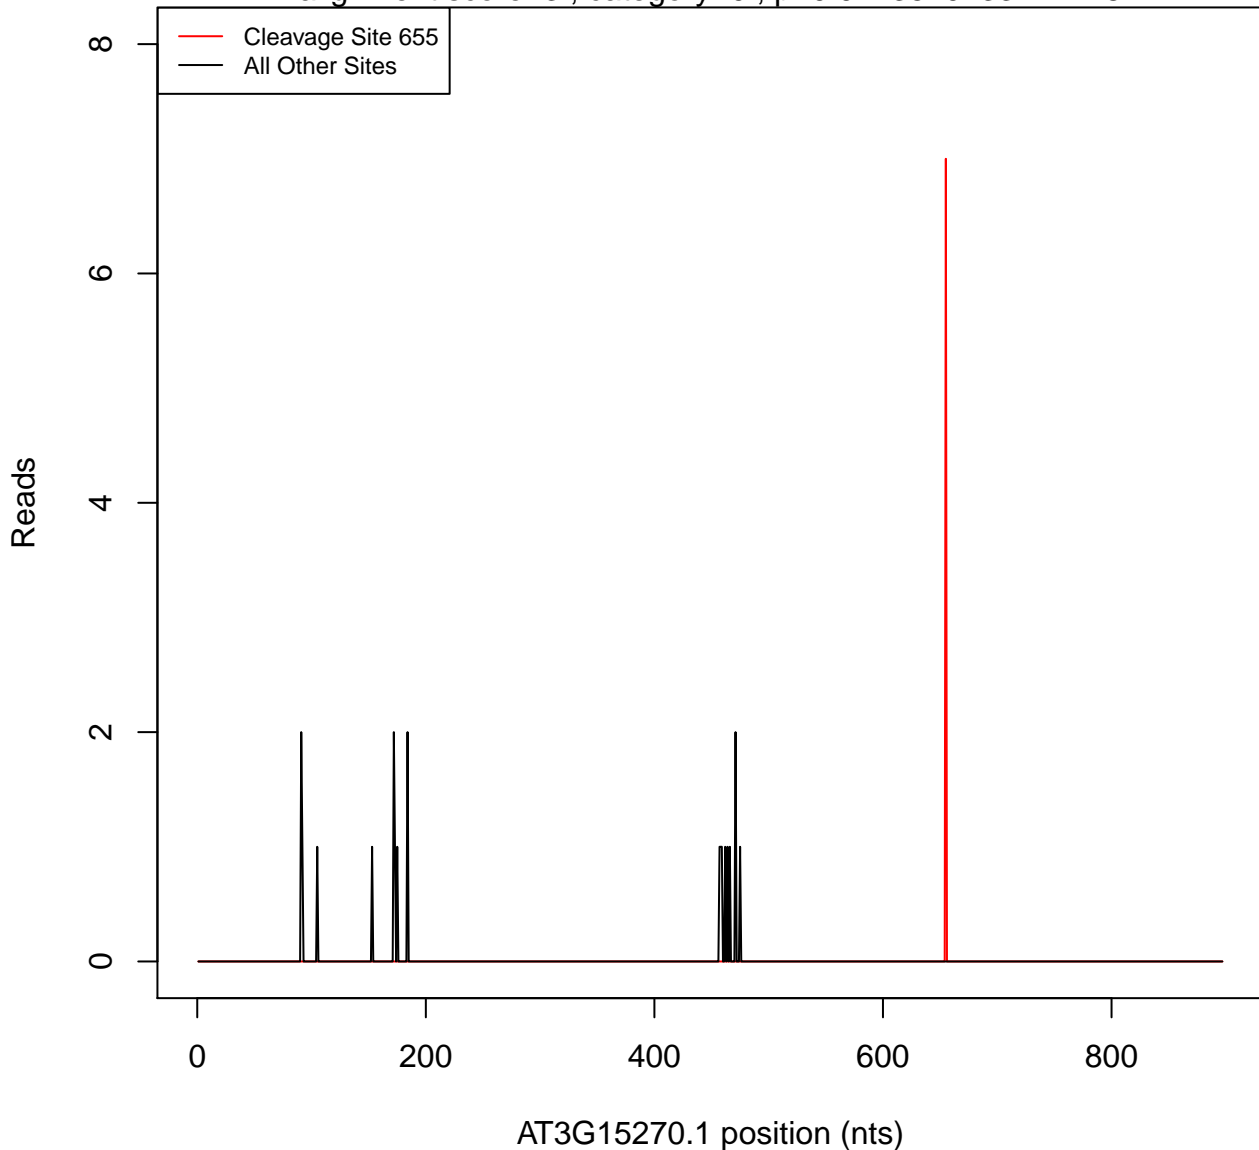

# ath-miR156b slicing AT3G15270.1 at nt 655

alignment score=3 , category=0 , p=0.0113520733142178

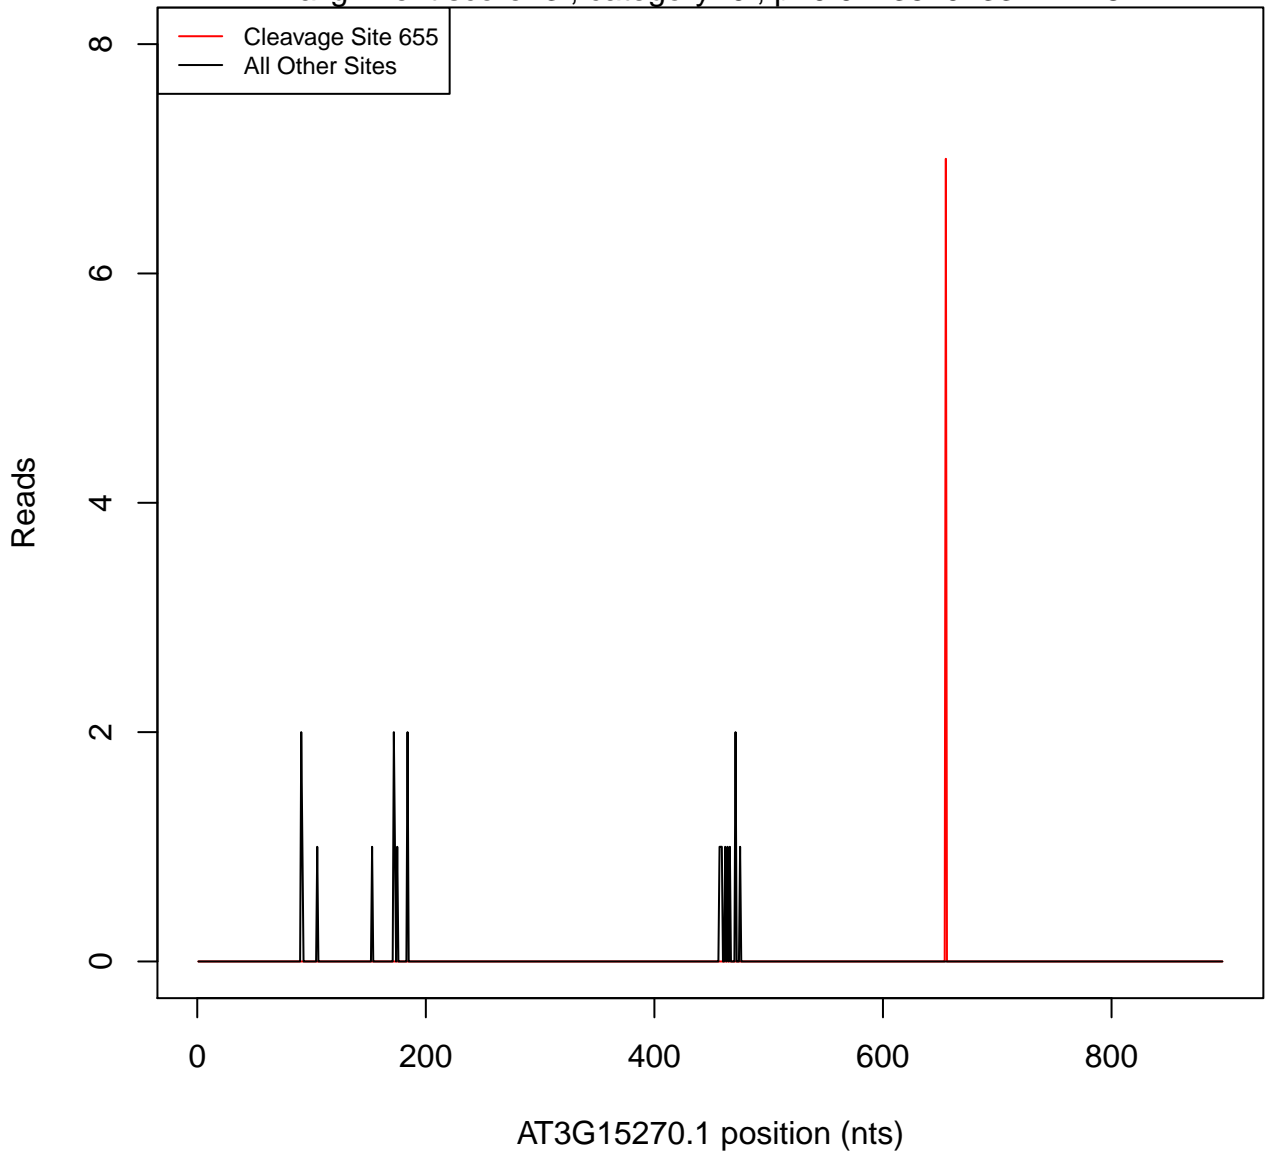

# ath-miR156c slicing AT3G15270.1 at nt 655

alignment score=3 , category=0 , p=0.0113520733142178





# ath-miR156d slicing AT3G15270.1 at nt 655

alignment score=3 , category=0 , p=0.0113520733142178



# ath-miR156e slicing AT3G15270.1 at nt 655

alignment score=3 , category=0 , p=0.0113520733142178

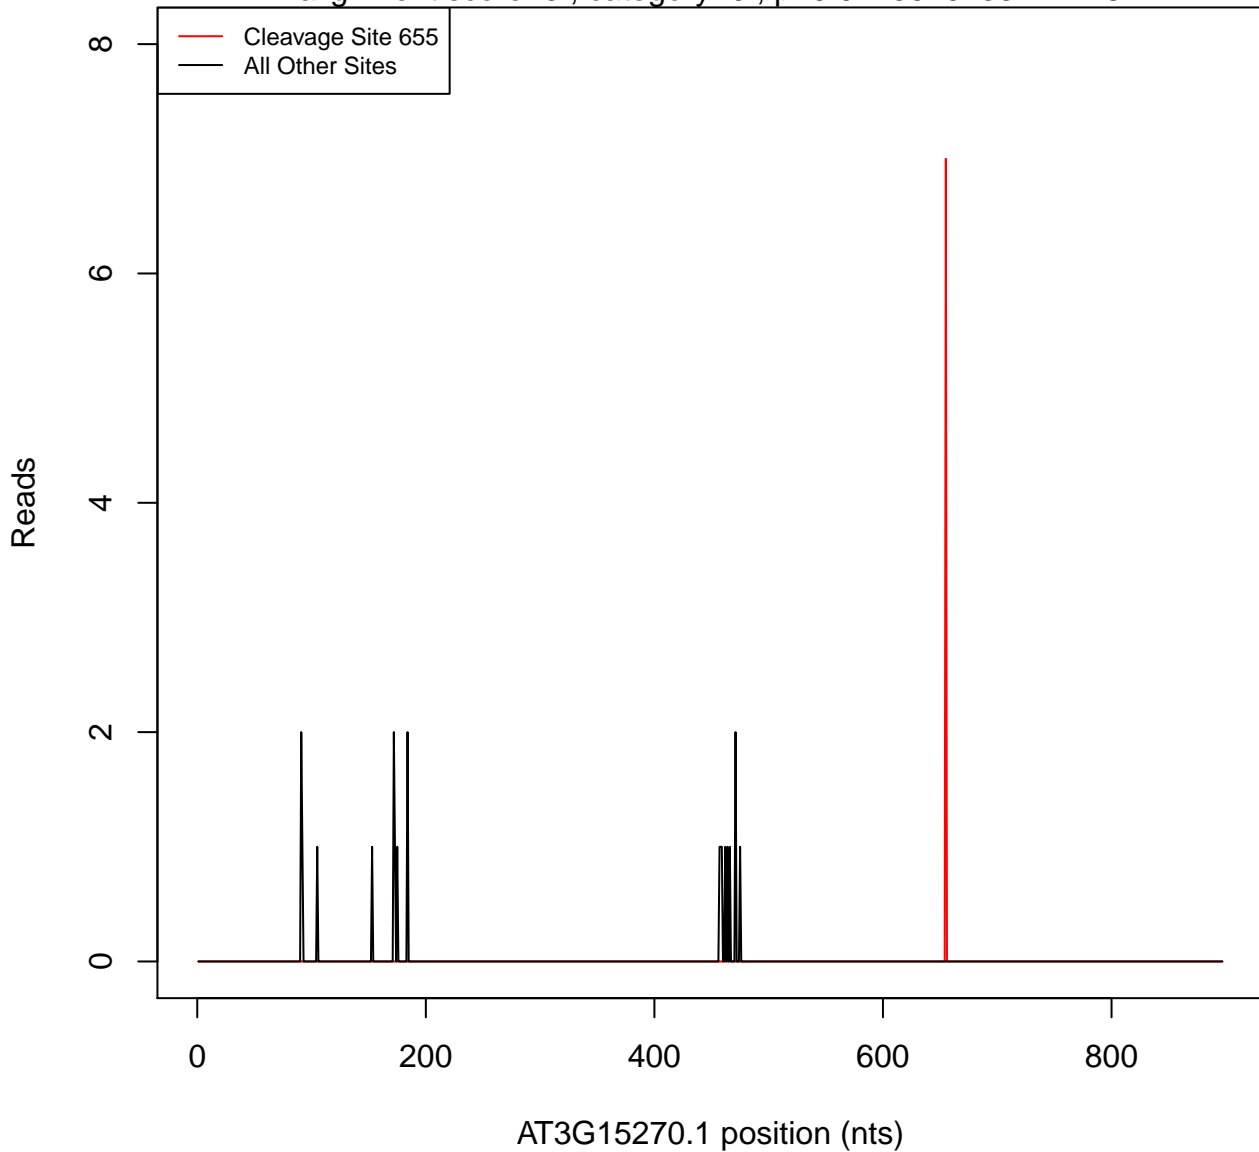

# ath-miR156f slicing AT3G15270.1 at nt 655

alignment score=3 , category=0 , p=0.0113520733142178

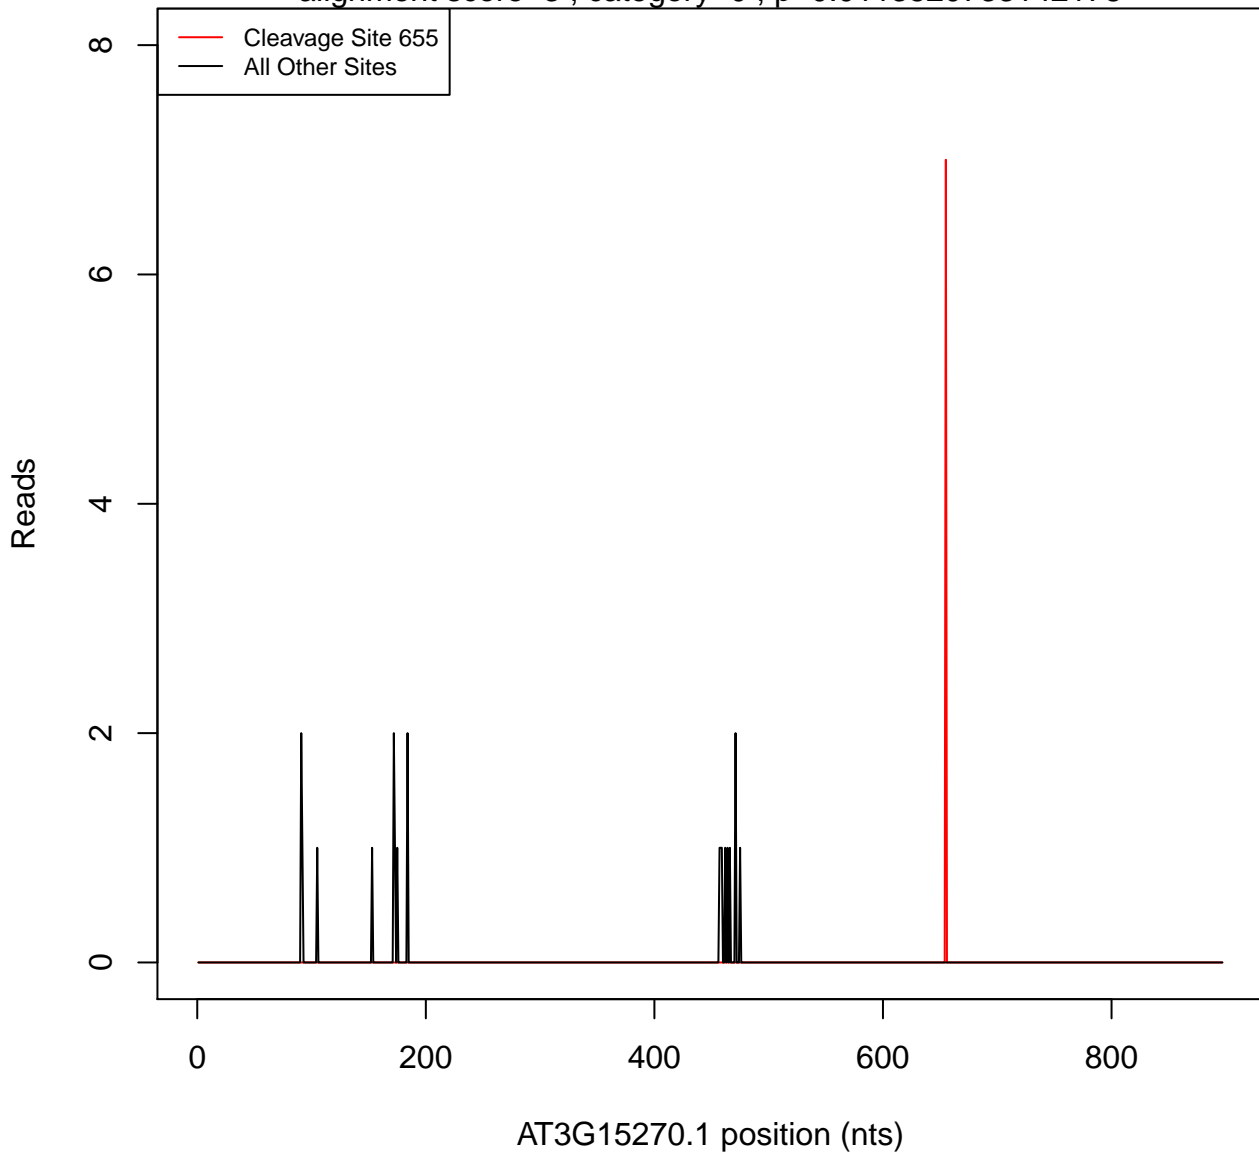

# ath-miR156g slicing AT3G15270.1 at nt 655

alignment score=4 , category=0 , p=0.0176030022941343

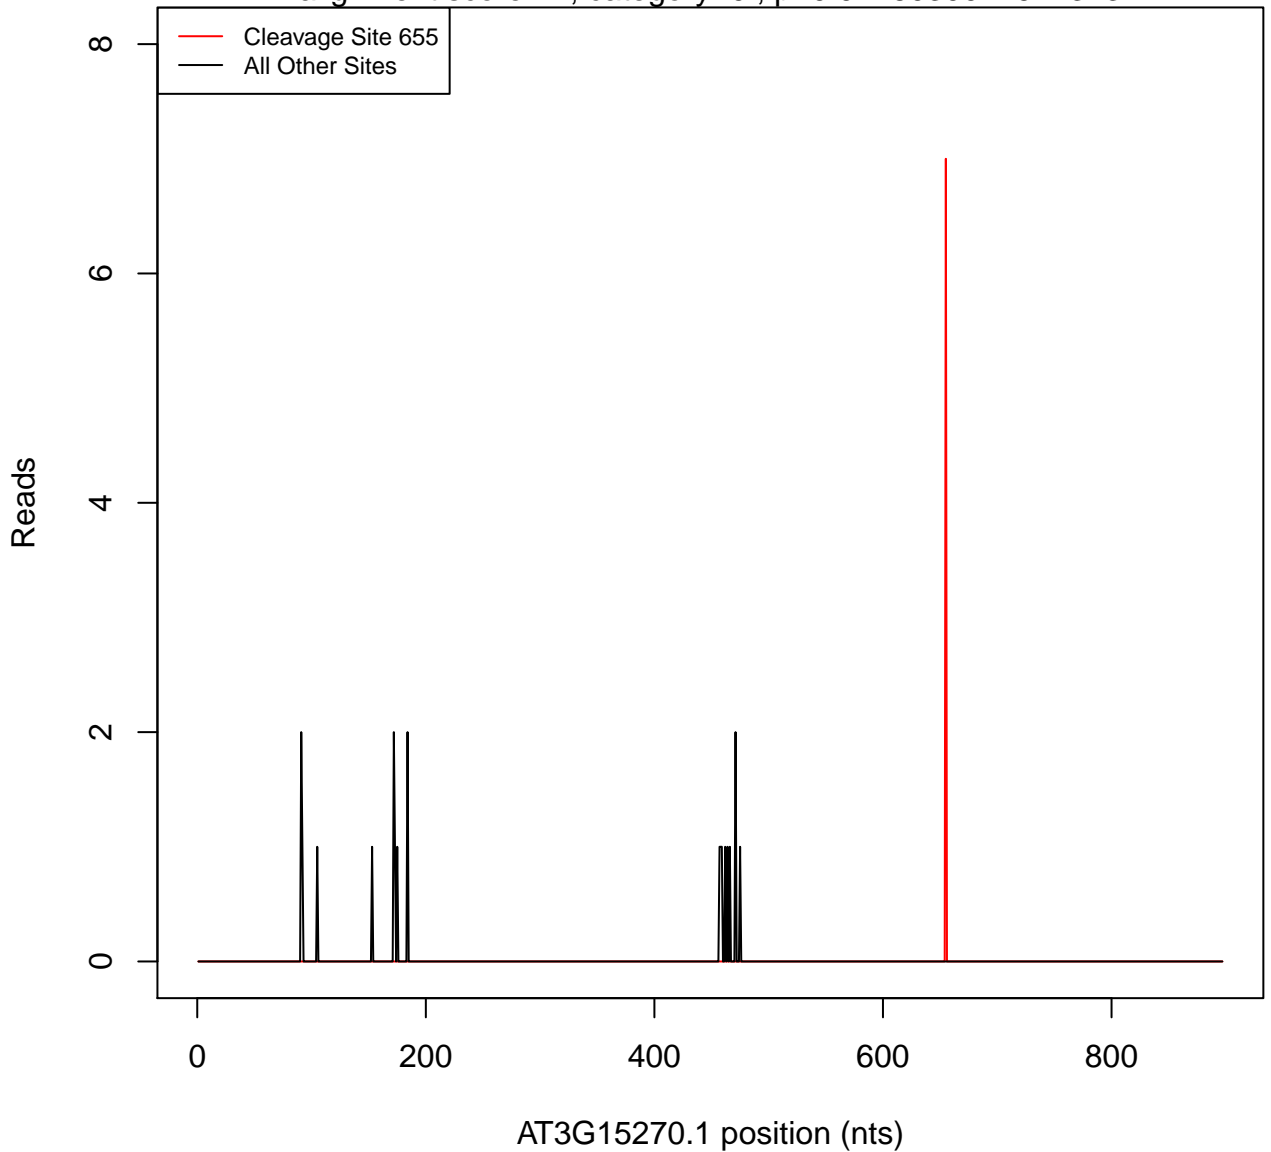

# ath-miR156h slicing AT3G15270.1 at nt 655

alignment score=4 , category=0 , p=0.0504806326824964

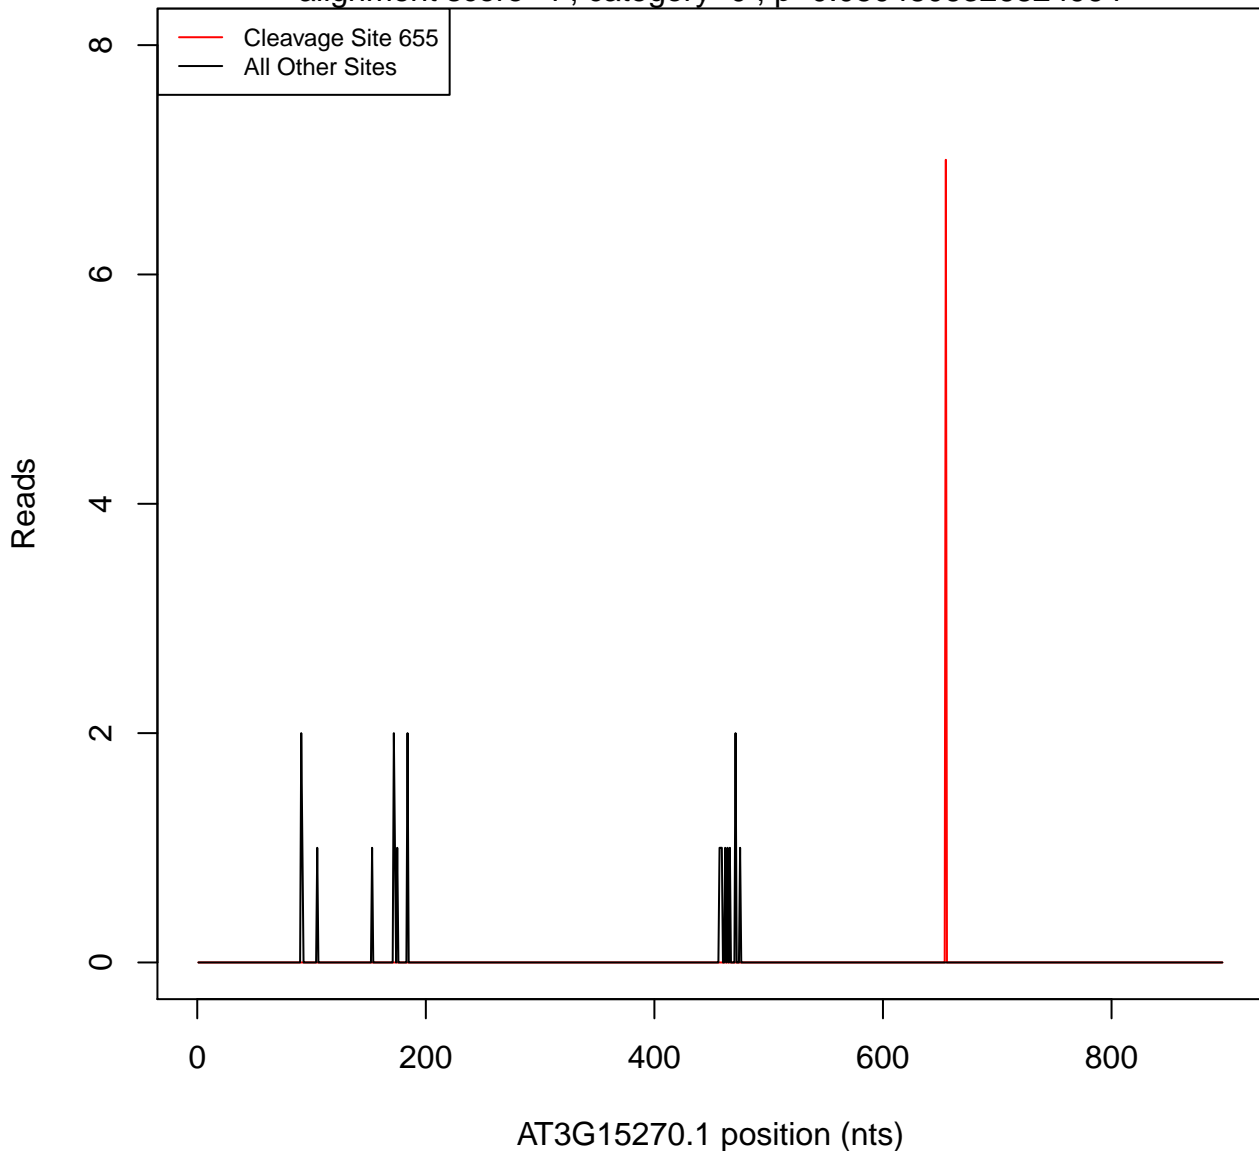

# ath-miR156i slicing AT3G15270.1 at nt 655

alignment score=1 , category=0 , p=0.0482697796921467

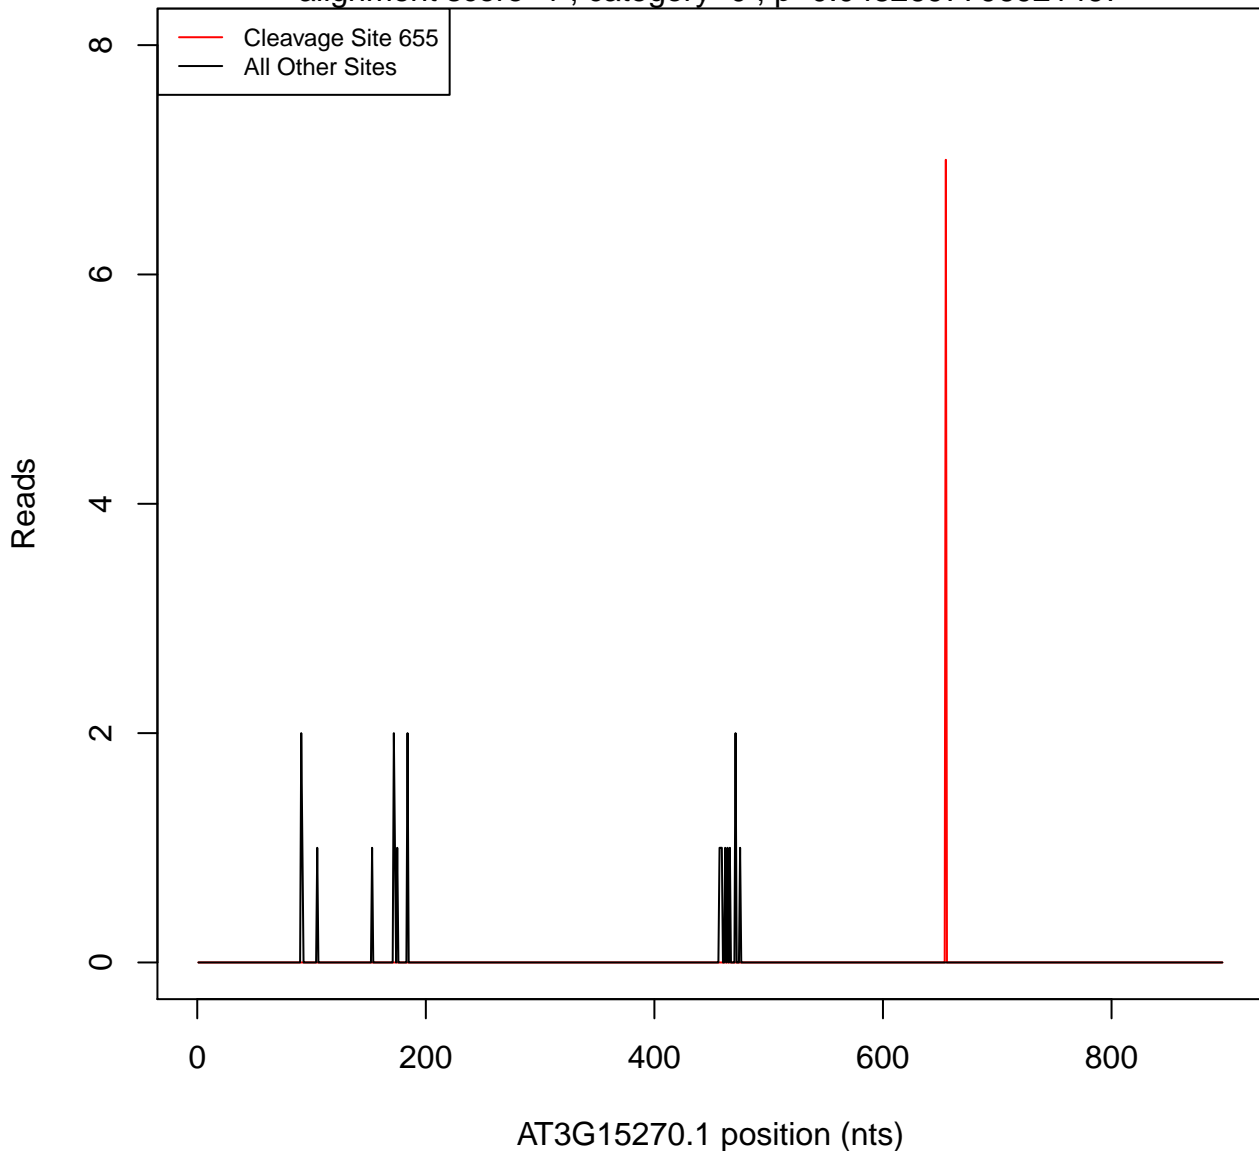

# ath-miR156j slicing AT3G15270.1 at nt 655

alignment score=2 , category=0 , p=0.00232298286129295

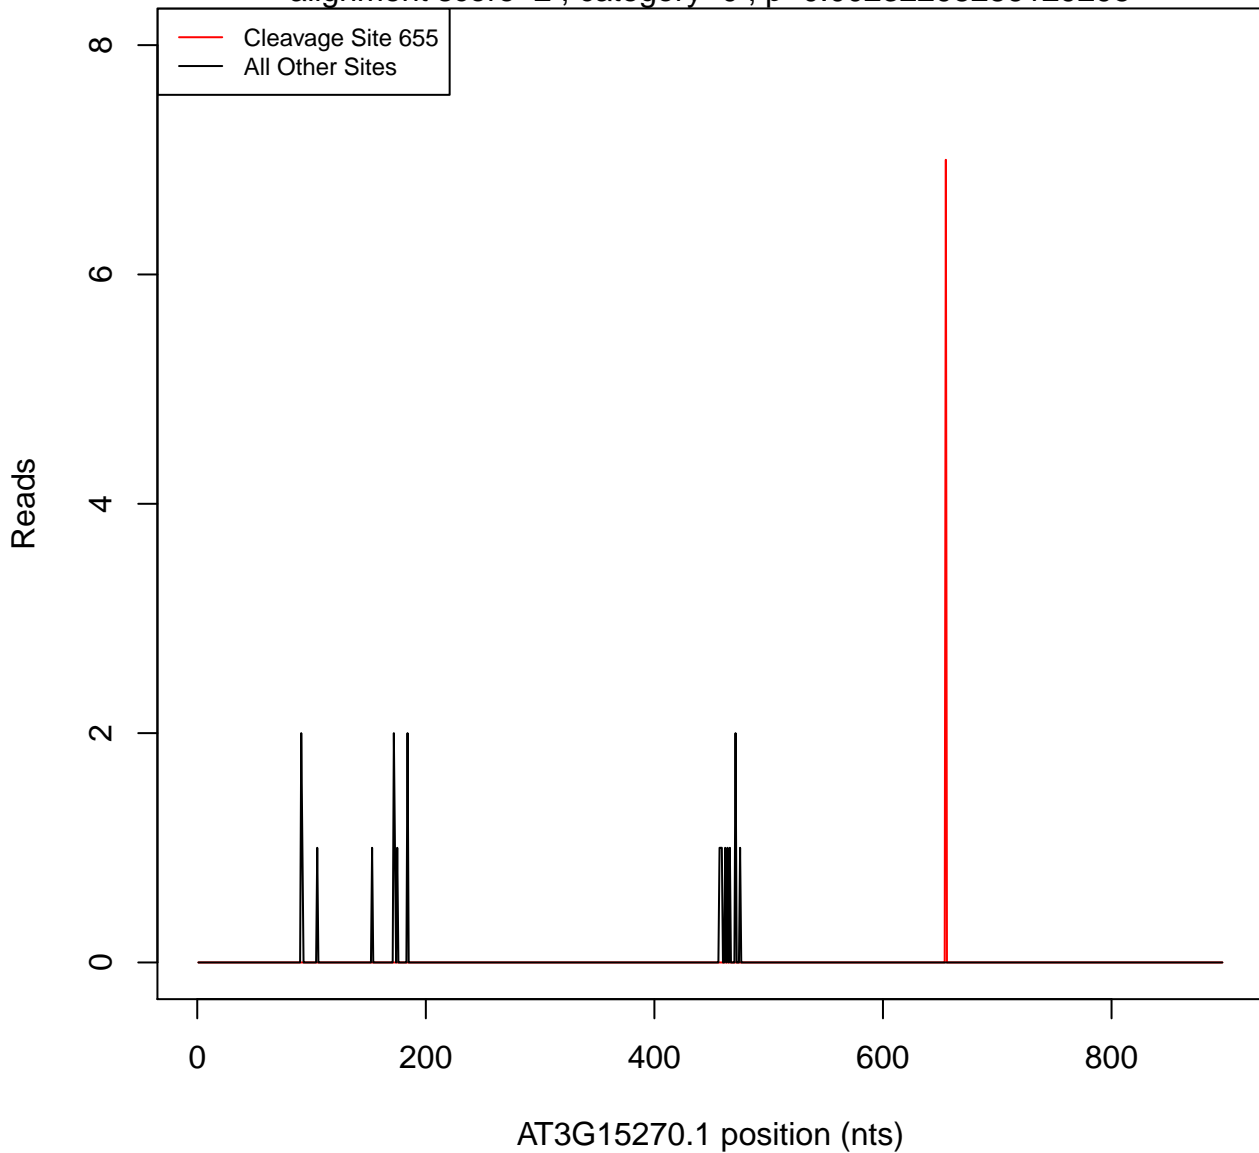

# ath-miR157d slicing AT3G15270.1 at nt 655

alignment score=4 , category=0 , p=0.0348961388985012

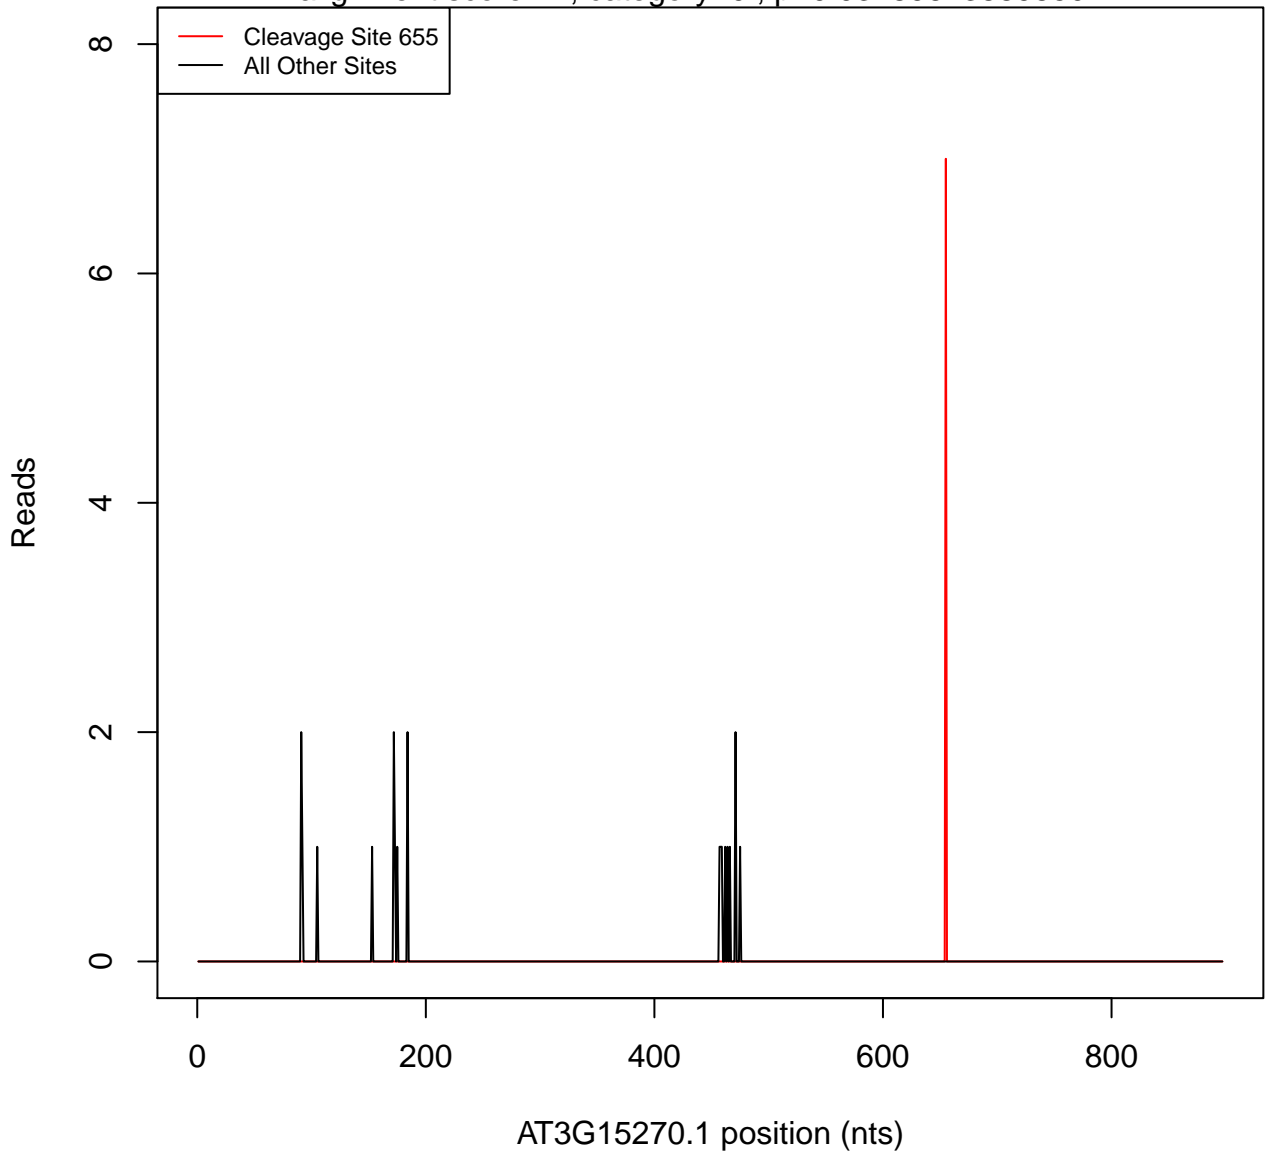



# ath-miR169a slicing AT3G20910.1 at nt 1046

alignment score=4 , category=0 , p=0.0161479965132542

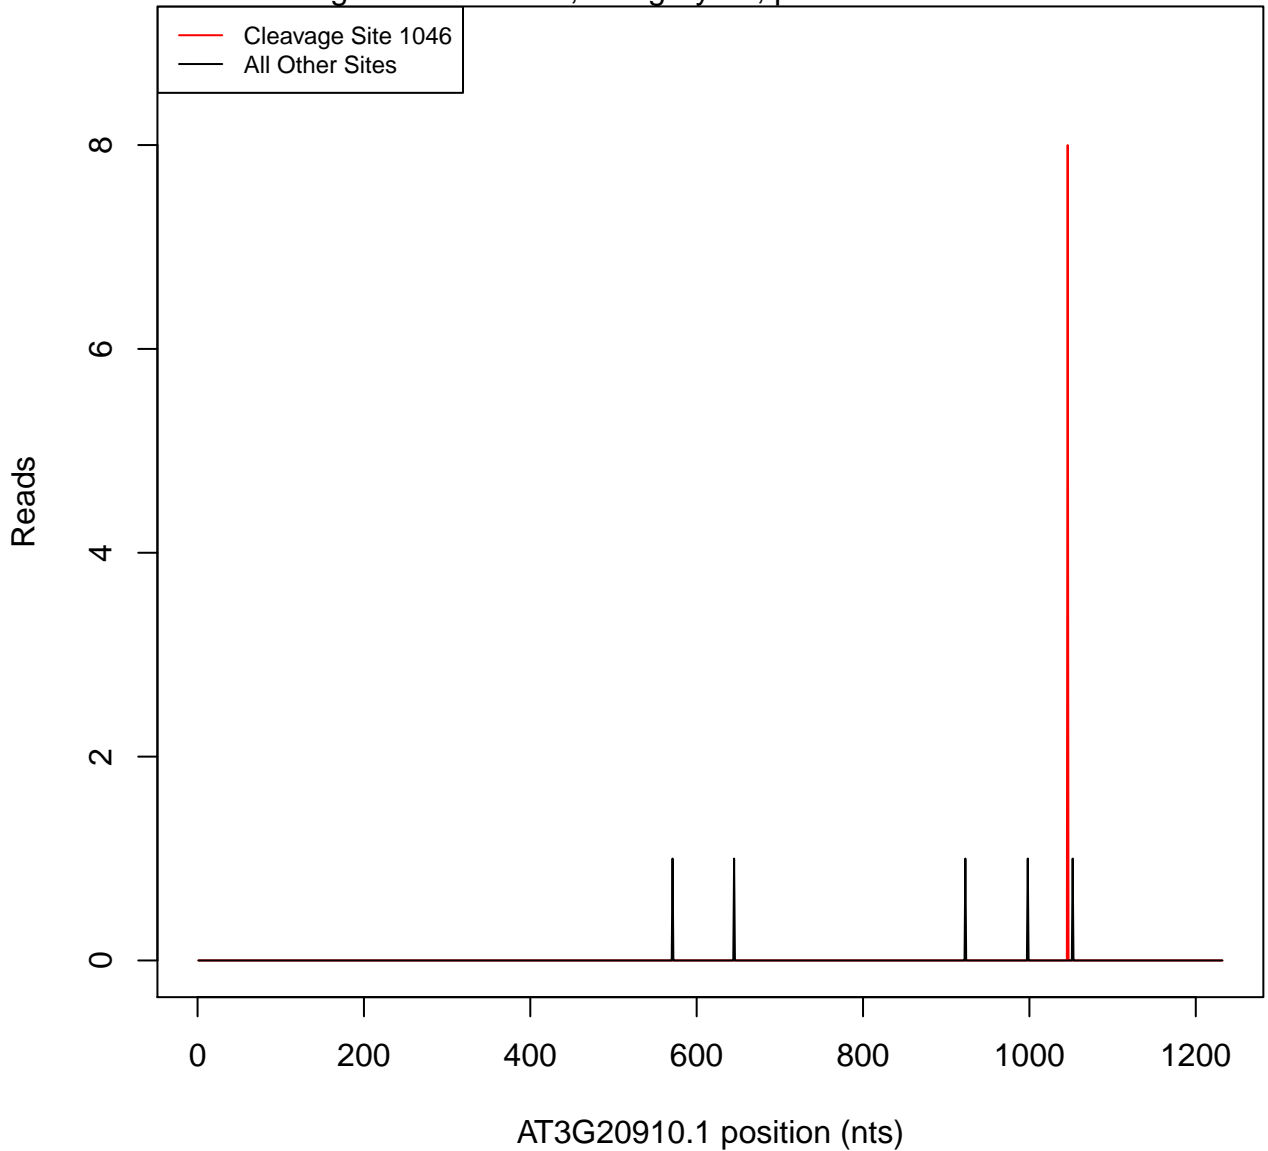

# ath-miR169b slicing AT3G20910.1 at nt 1046

alignment score=4 , category=0 , p=0.0132315168322058

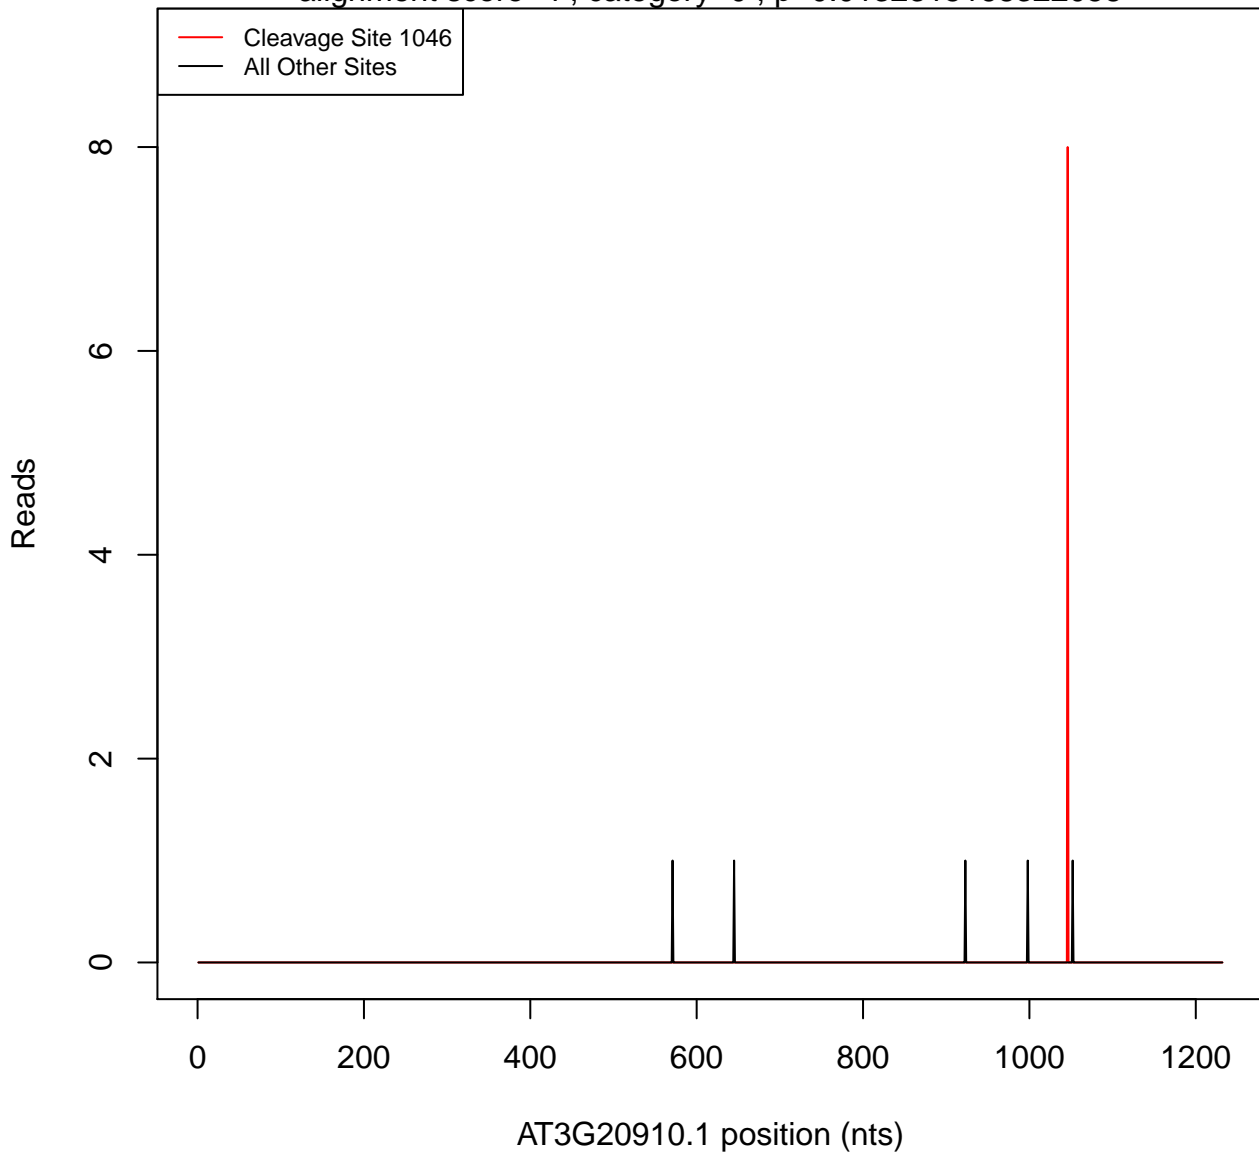

# ath-miR169c slicing AT3G20910.1 at nt 1046

alignment score=4 , category=0 , p=0.0132315168322058



# ath-miR395a slicing AT3G22890.1 at nt 453

alignment score=3.5 , category=1 , p=0.00464774739067697

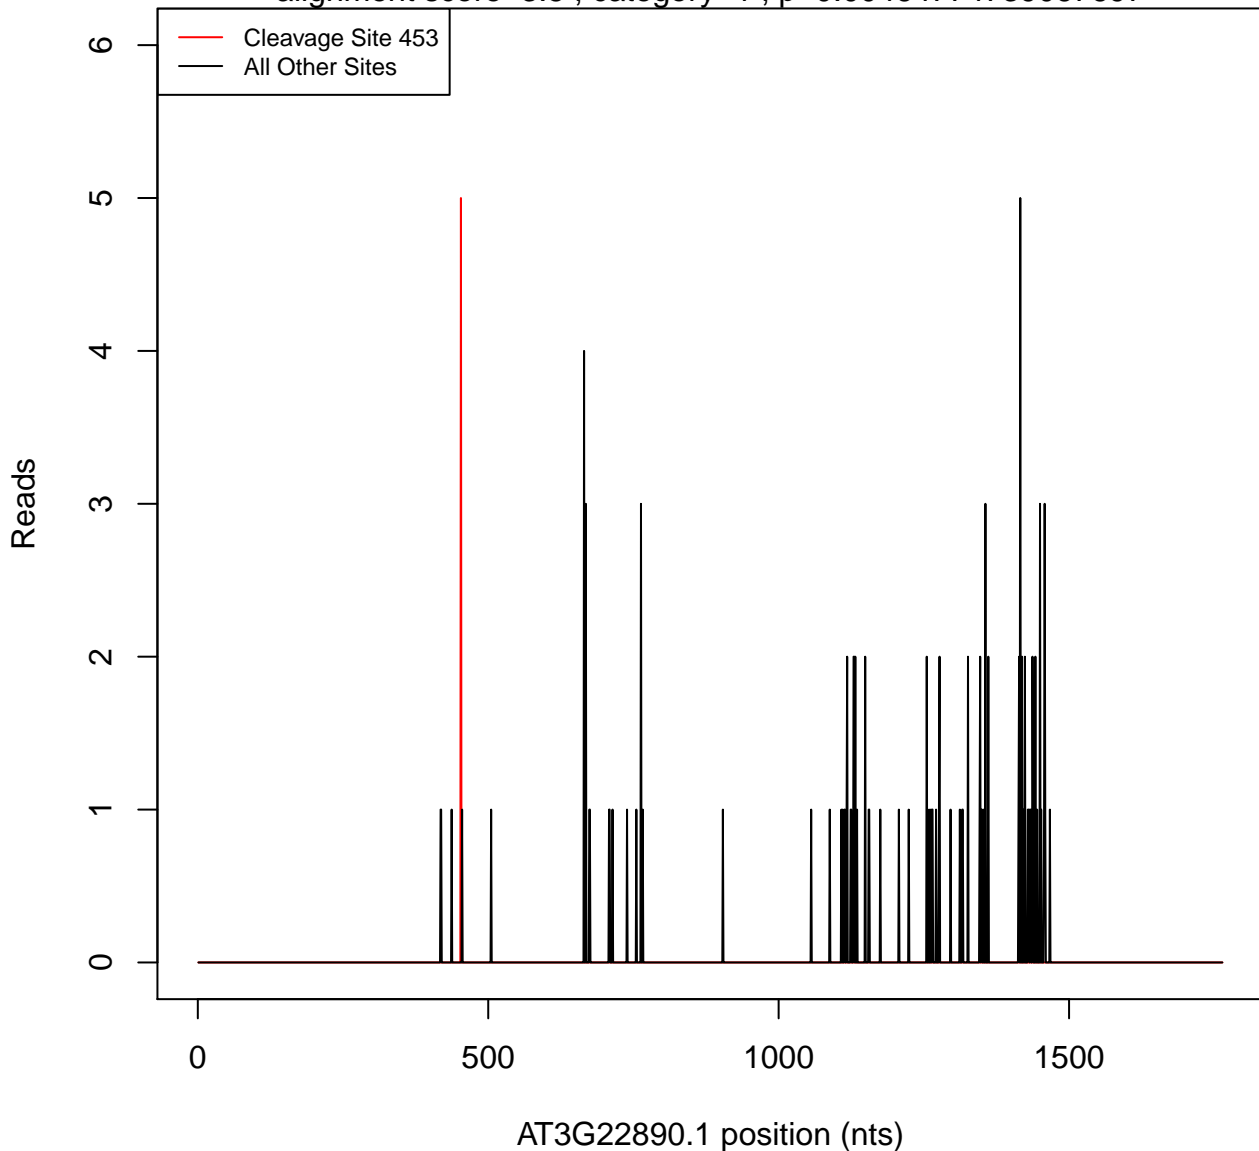

# ath-miR395b slicing AT3G22890.1 at nt 453

alignment score=4 , category=1 , p=0.00677073960566377

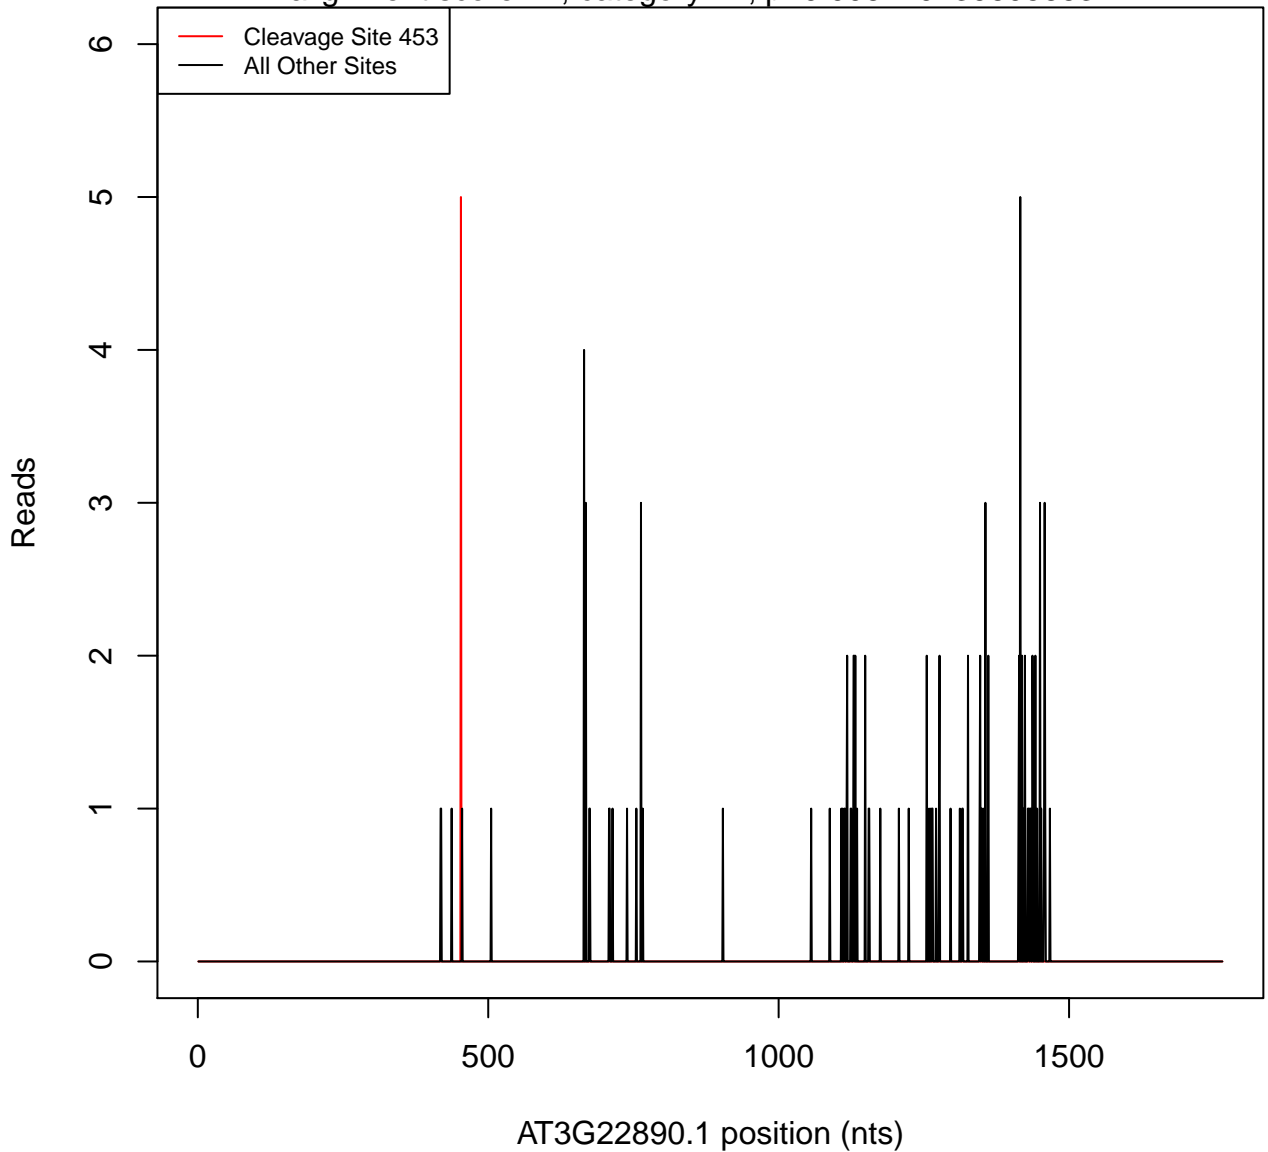

# ath-miR395c slicing AT3G22890.1 at nt 453

alignment score=3.5 , category=1 , p=0.00464774739067697

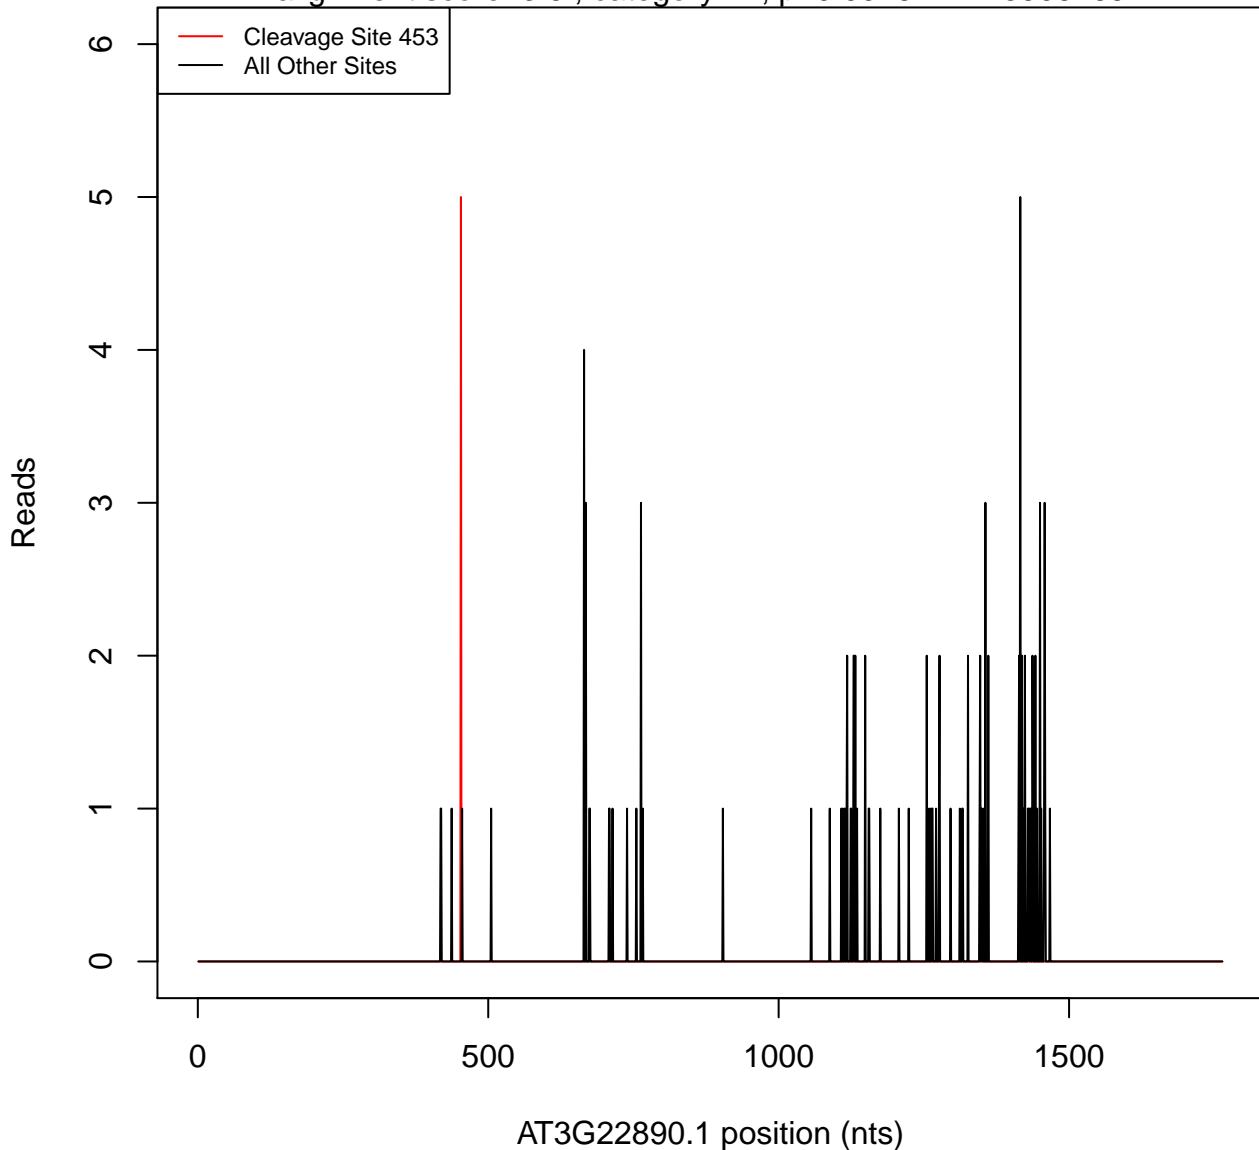

# ath-miR395d slicing AT3G22890.1 at nt 453

alignment score=3.5 , category=1 , p=0.00464774739067697

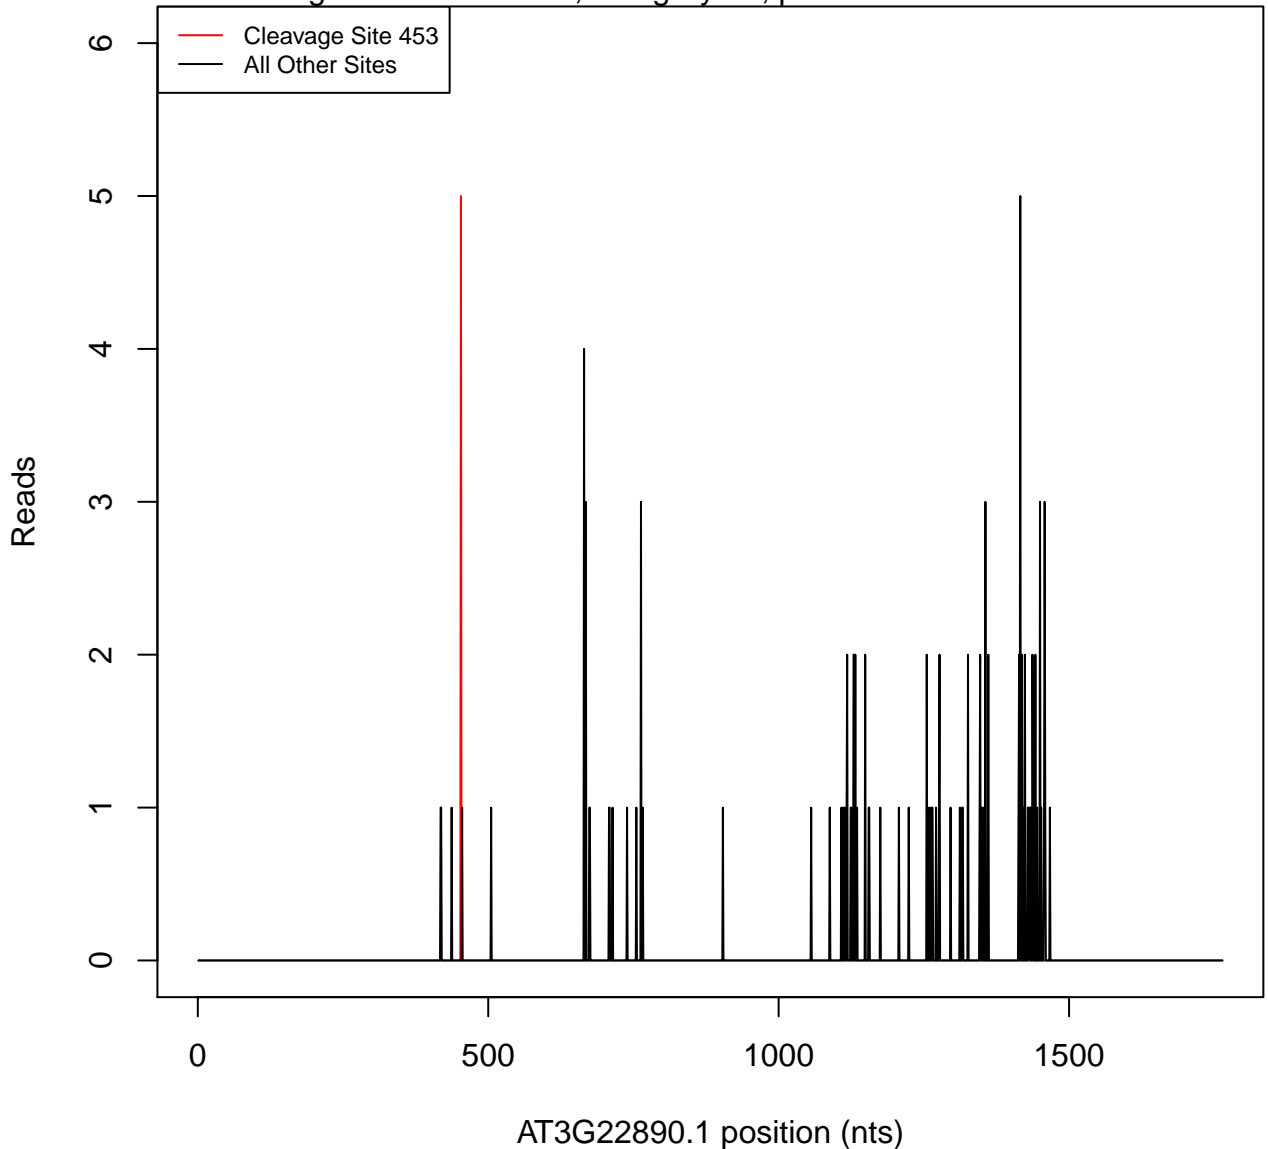

# ath-miR395e slicing AT3G22890.1 at nt 453

alignment score=3.5 , category=1 , p=0.00464774739067697





# ath-miR395f slicing AT3G22890.1 at nt 453

alignment score=4 , category=1 , p=0.00677073960566377



# ath-miR828 slicing AT3G25795.1 at nt 888

alignment score=1 , category=1 , p=0.00252021735534536

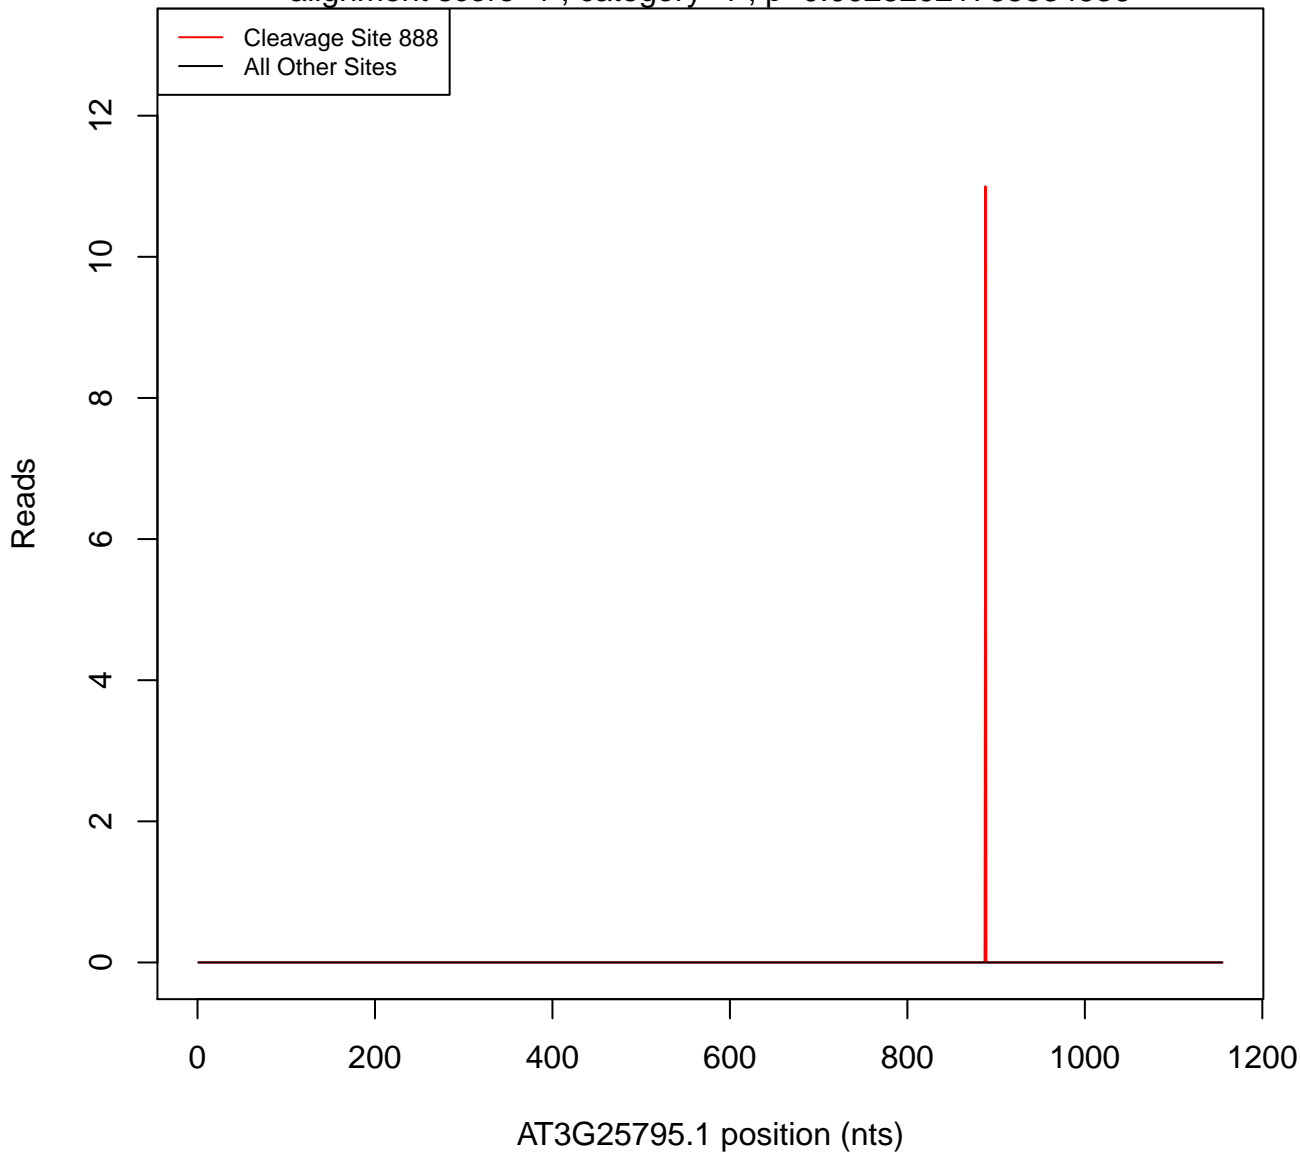

# ath-miR393a slicing AT3G26810.1 at nt 2010

alignment score=2 , category=0 , p=0.00925960406138815

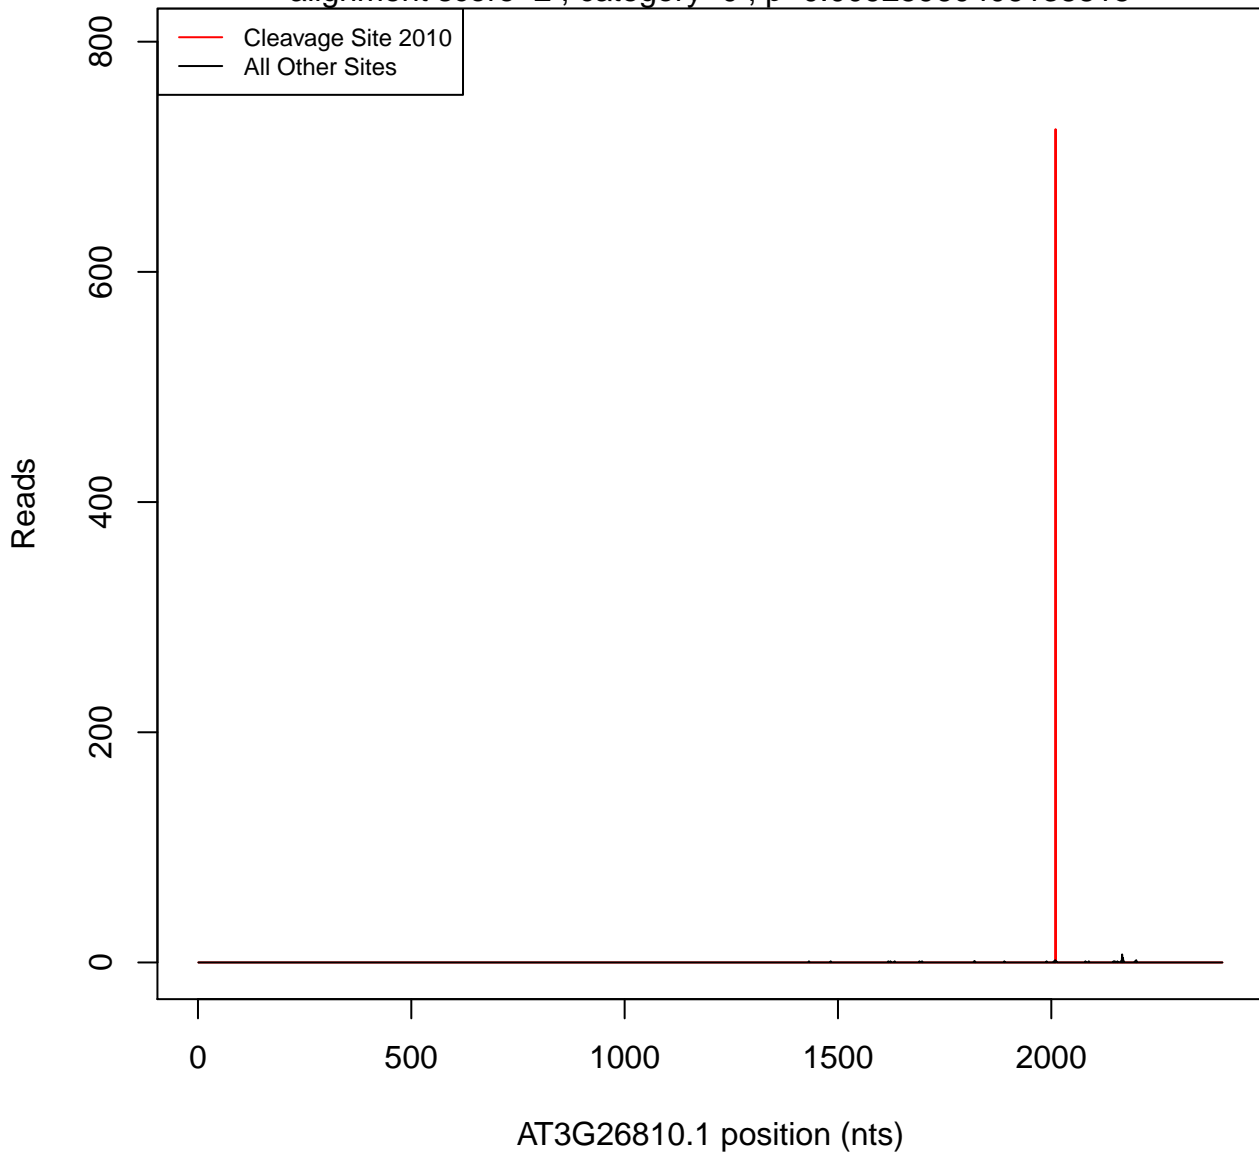

# ath-miR393b slicing AT3G26810.1 at nt 2010

alignment score=2 , category=0 , p=0.00925960406138815



# ath-miR171b slicing AT3G60630.1 at nt 1053

alignment score=3 , category=2 , p=0.0925034127779172

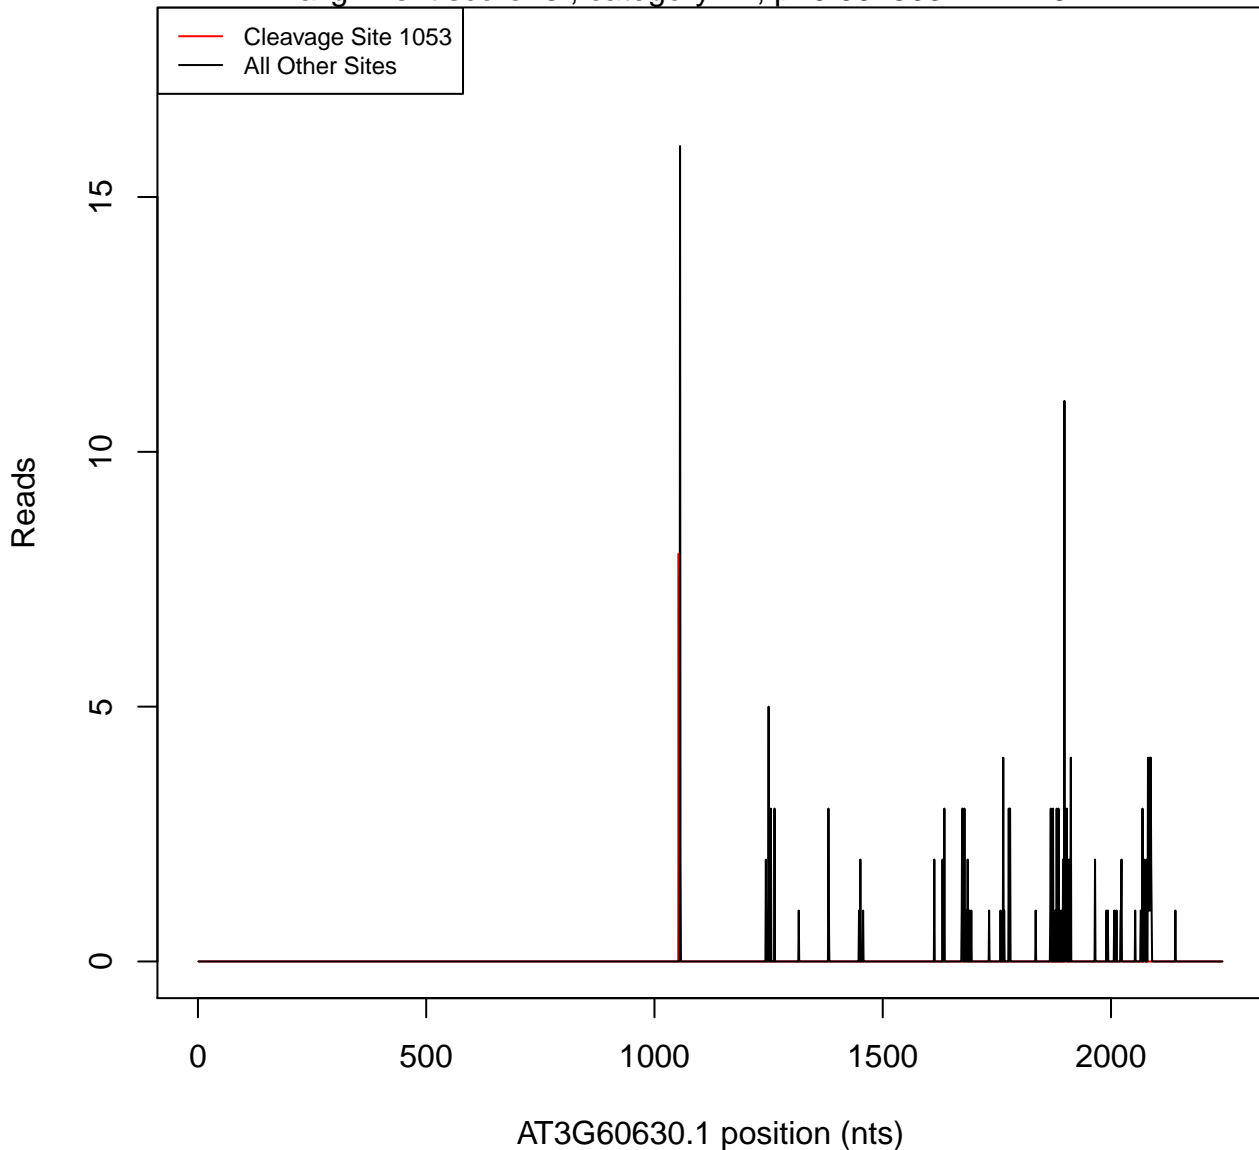

# ath-miR171c slicing AT3G60630.1 at nt 1053

alignment score=3 , category=2 , p=0.0925034127779172

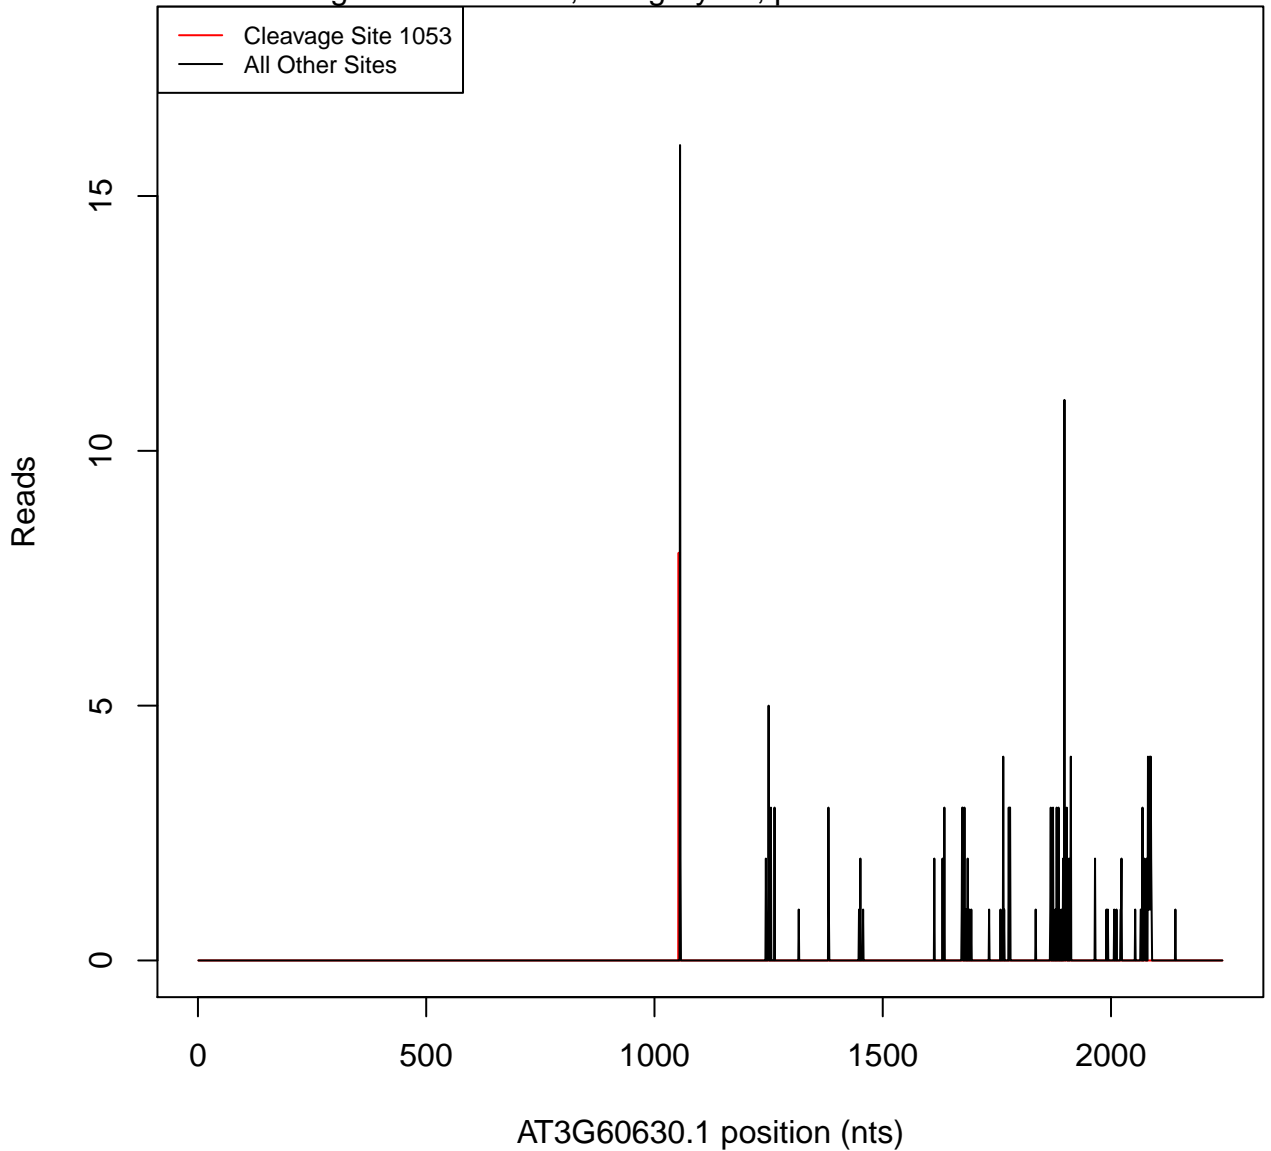

# ath-miR170\_1ss3AT slicing AT3G60630.1 at nt 1056

alignment score=3.5 , category=0 , p=0.00506137007480845

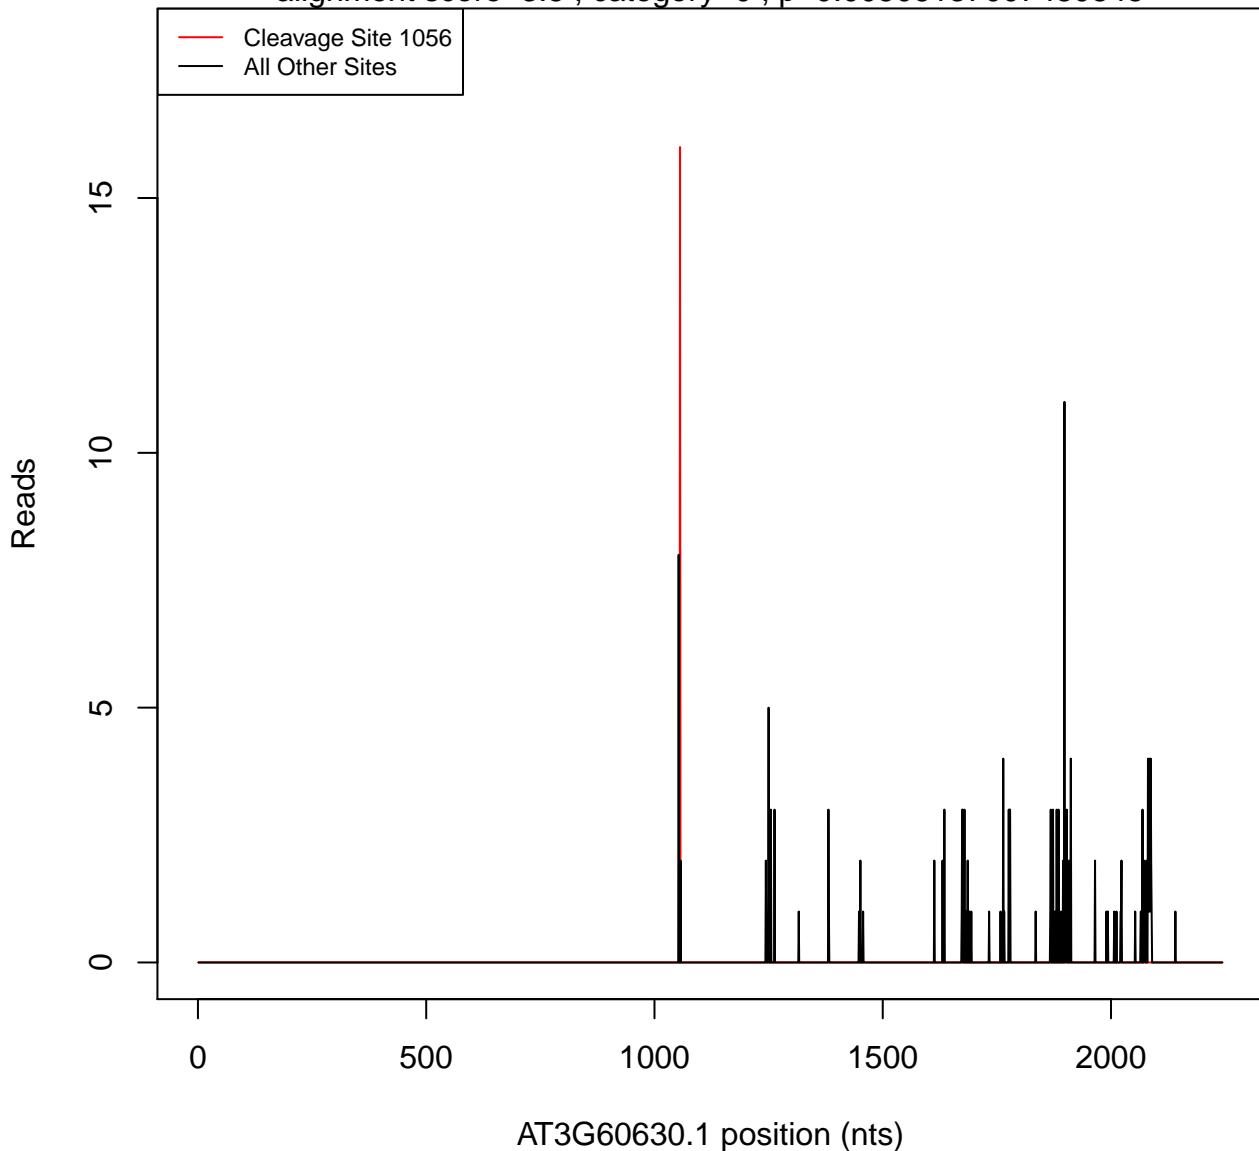

# ath-miR170 slicing AT3G60630.1 at nt 1056

alignment score=1.5 , category=0 , p=0.00758244044293721

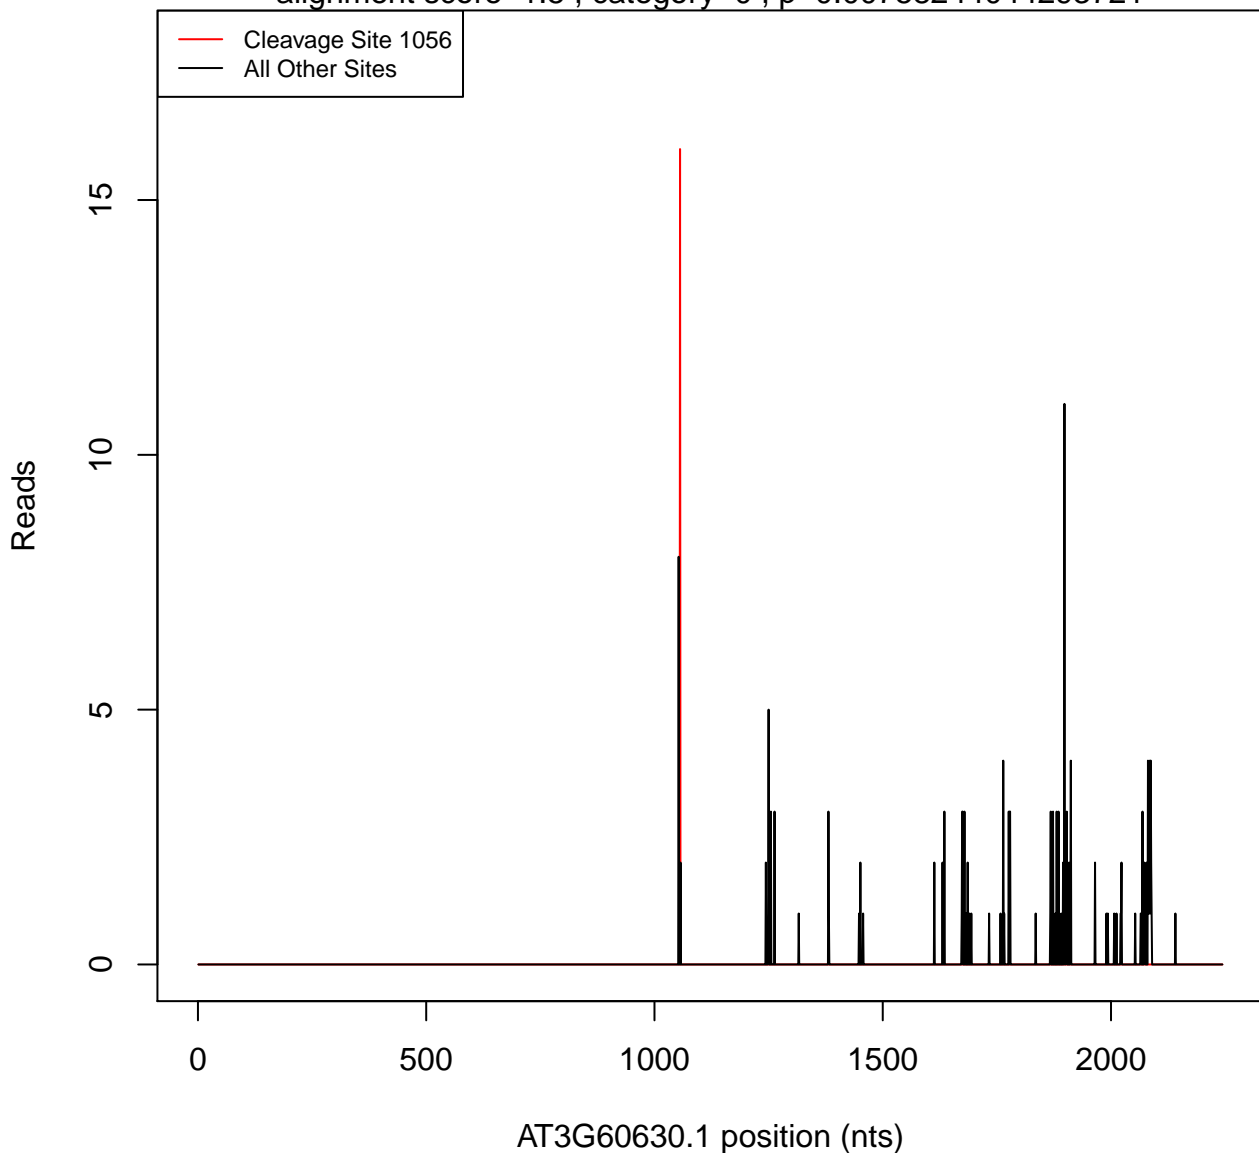



# ath-miR171a slicing AT3G60630.1 at nt 1056

alignment score=0 , category=0 , p=0.00946905012379662

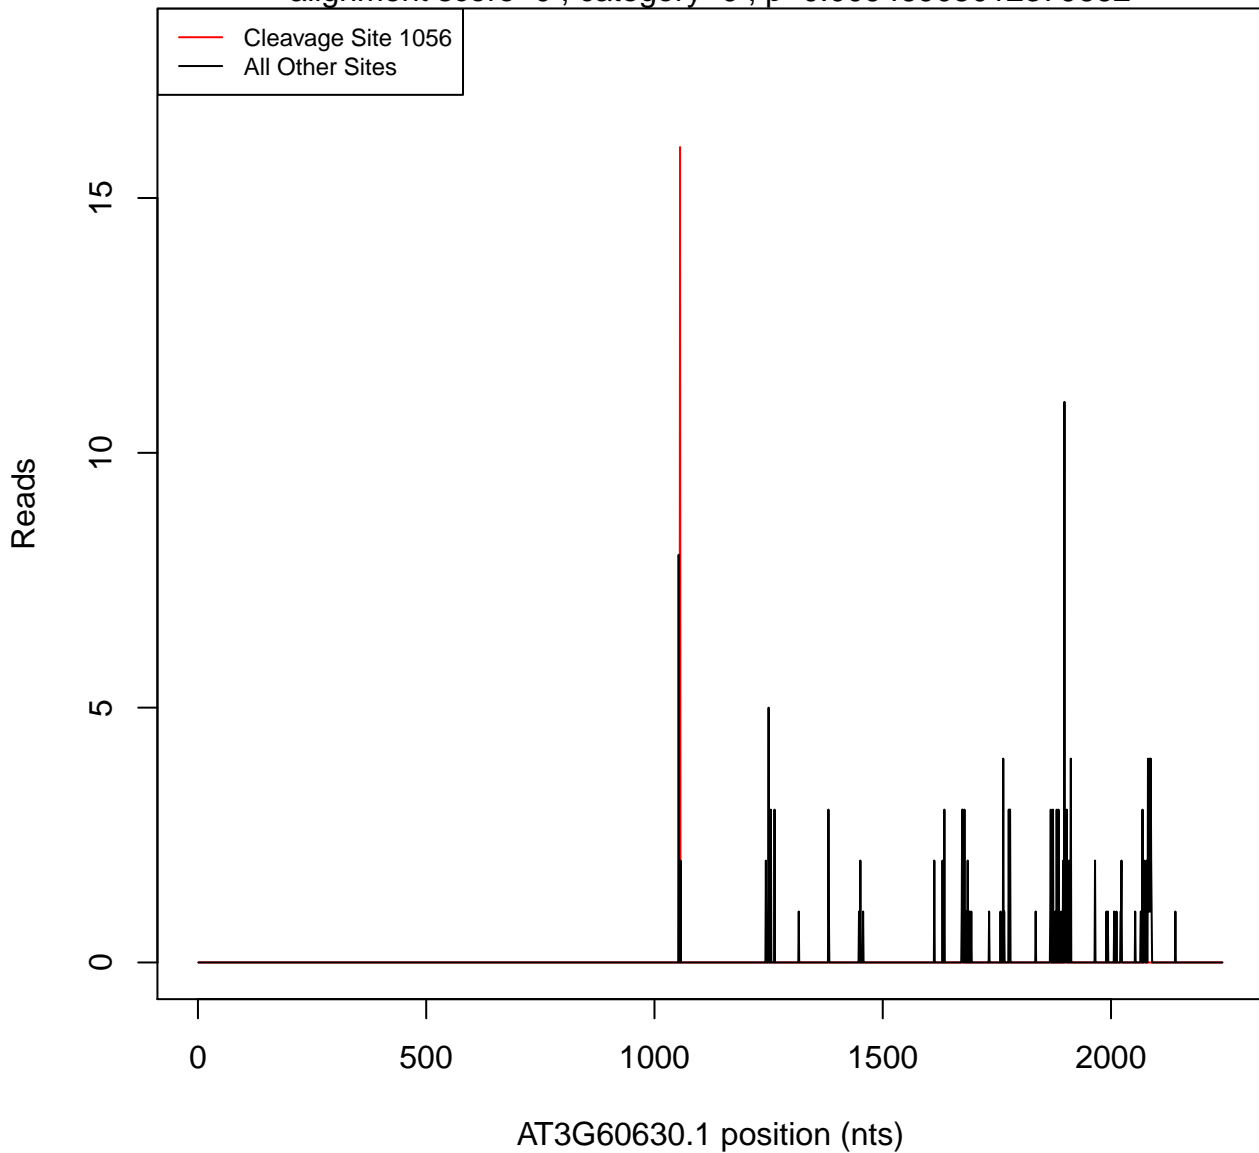

# ath-miR393a slicing AT3G62980.1 at nt 1722

alignment score=2 , category=0 , p=0.00925960406138815

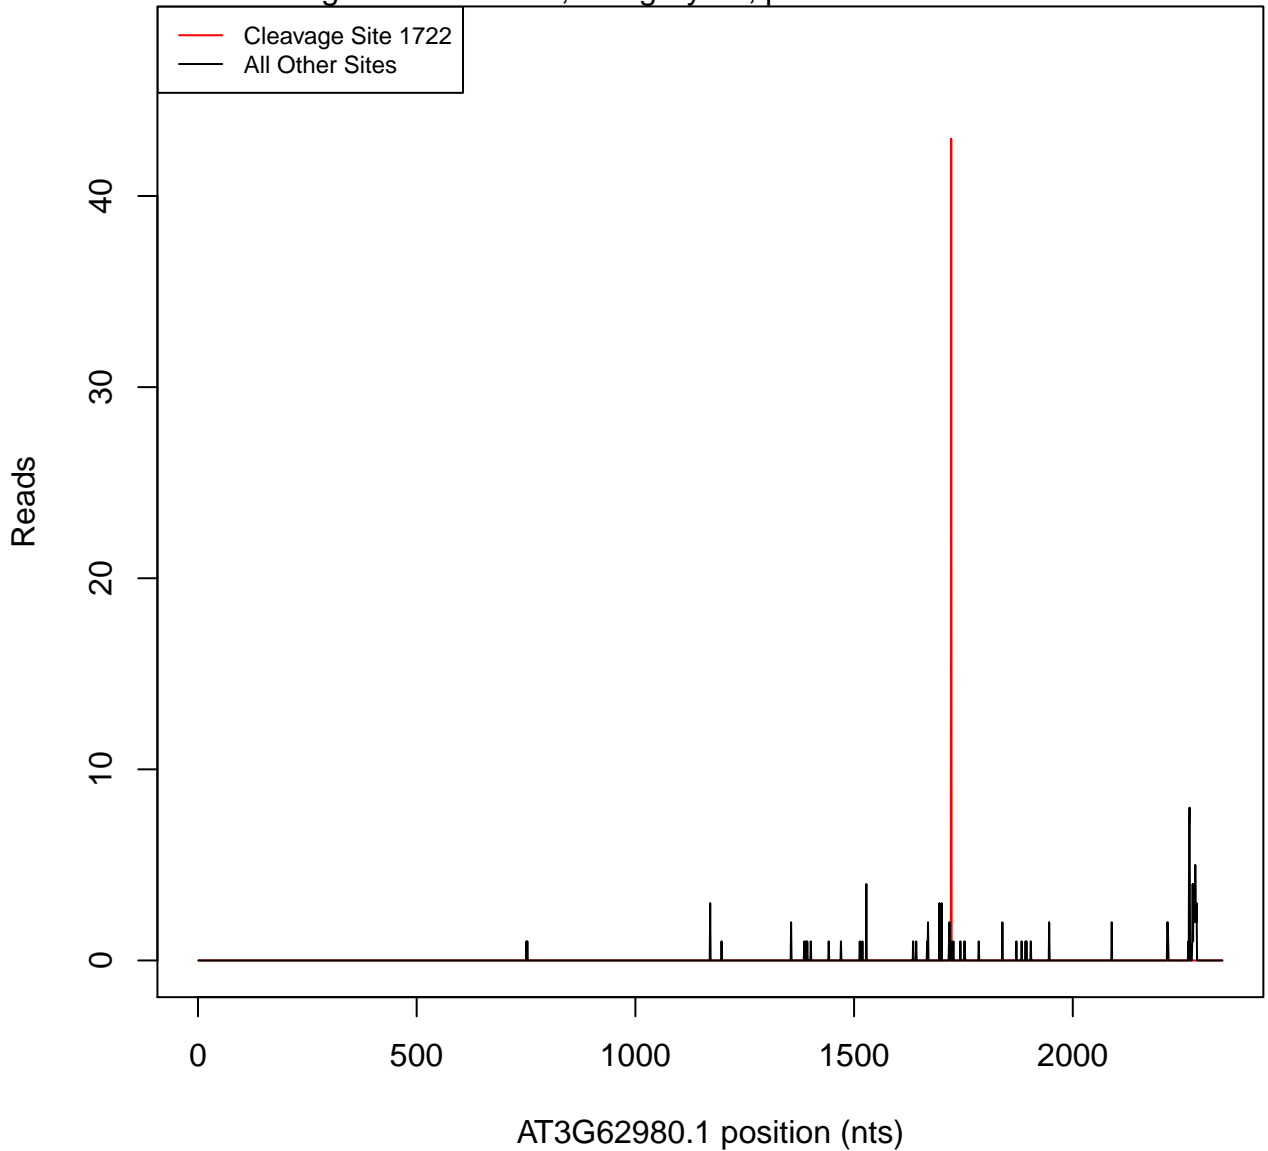

# ath-miR393b slicing AT3G62980.1 at nt 1722

alignment score=2 , category=0 , p=0.00925960406138815

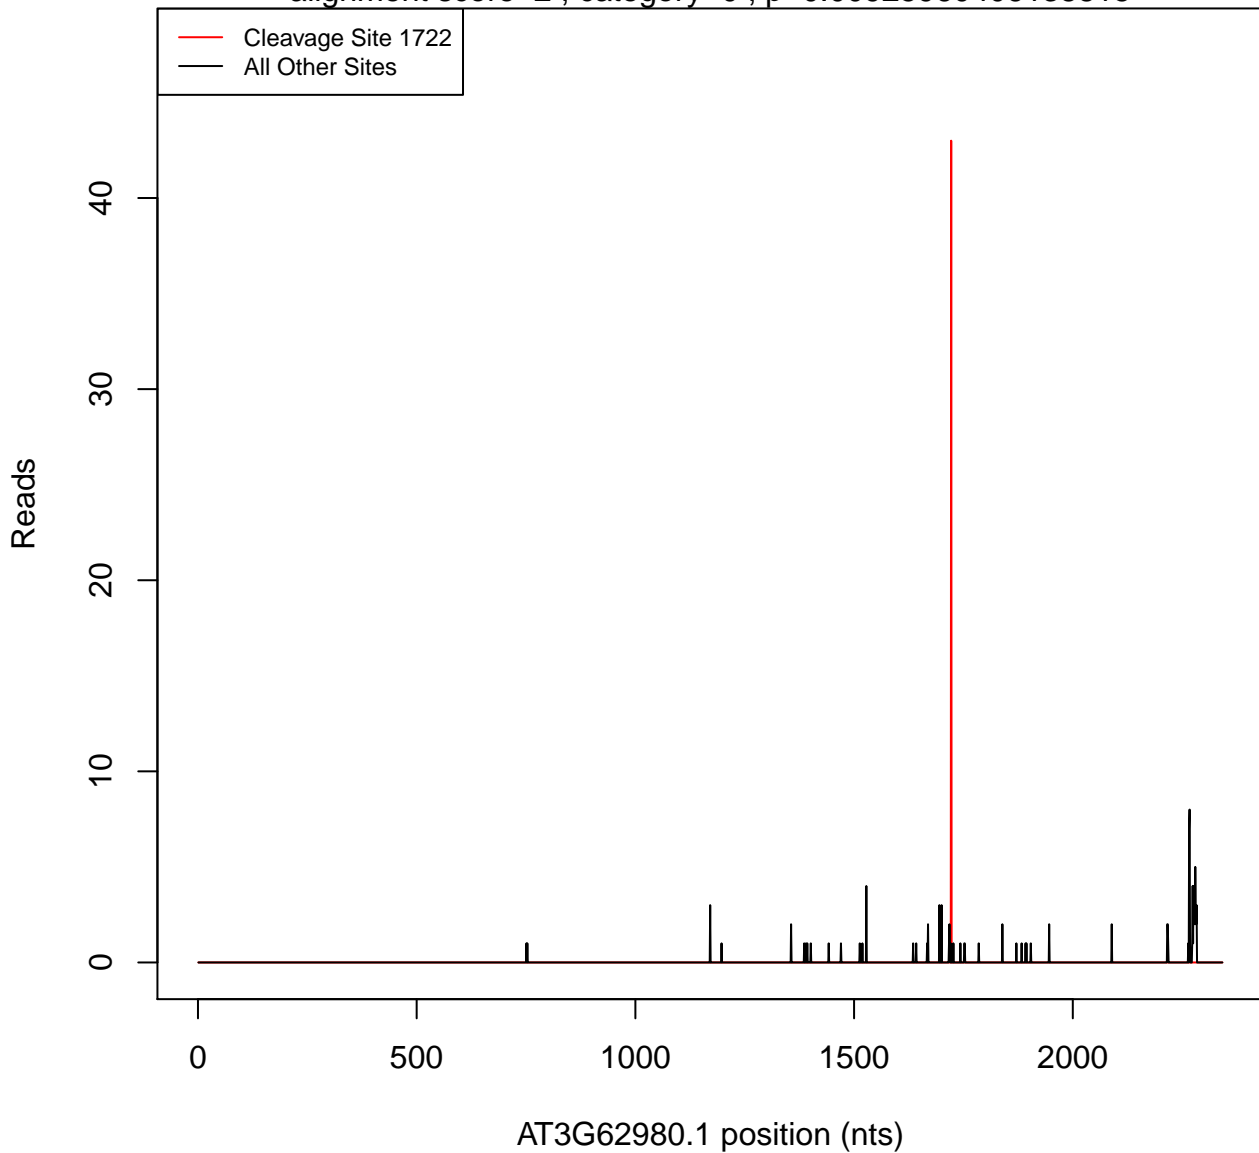

# ath-miR393a slicing AT4G03190.1 at nt 1598

alignment score=3.5 , category=0 , p=0.00168997777427415

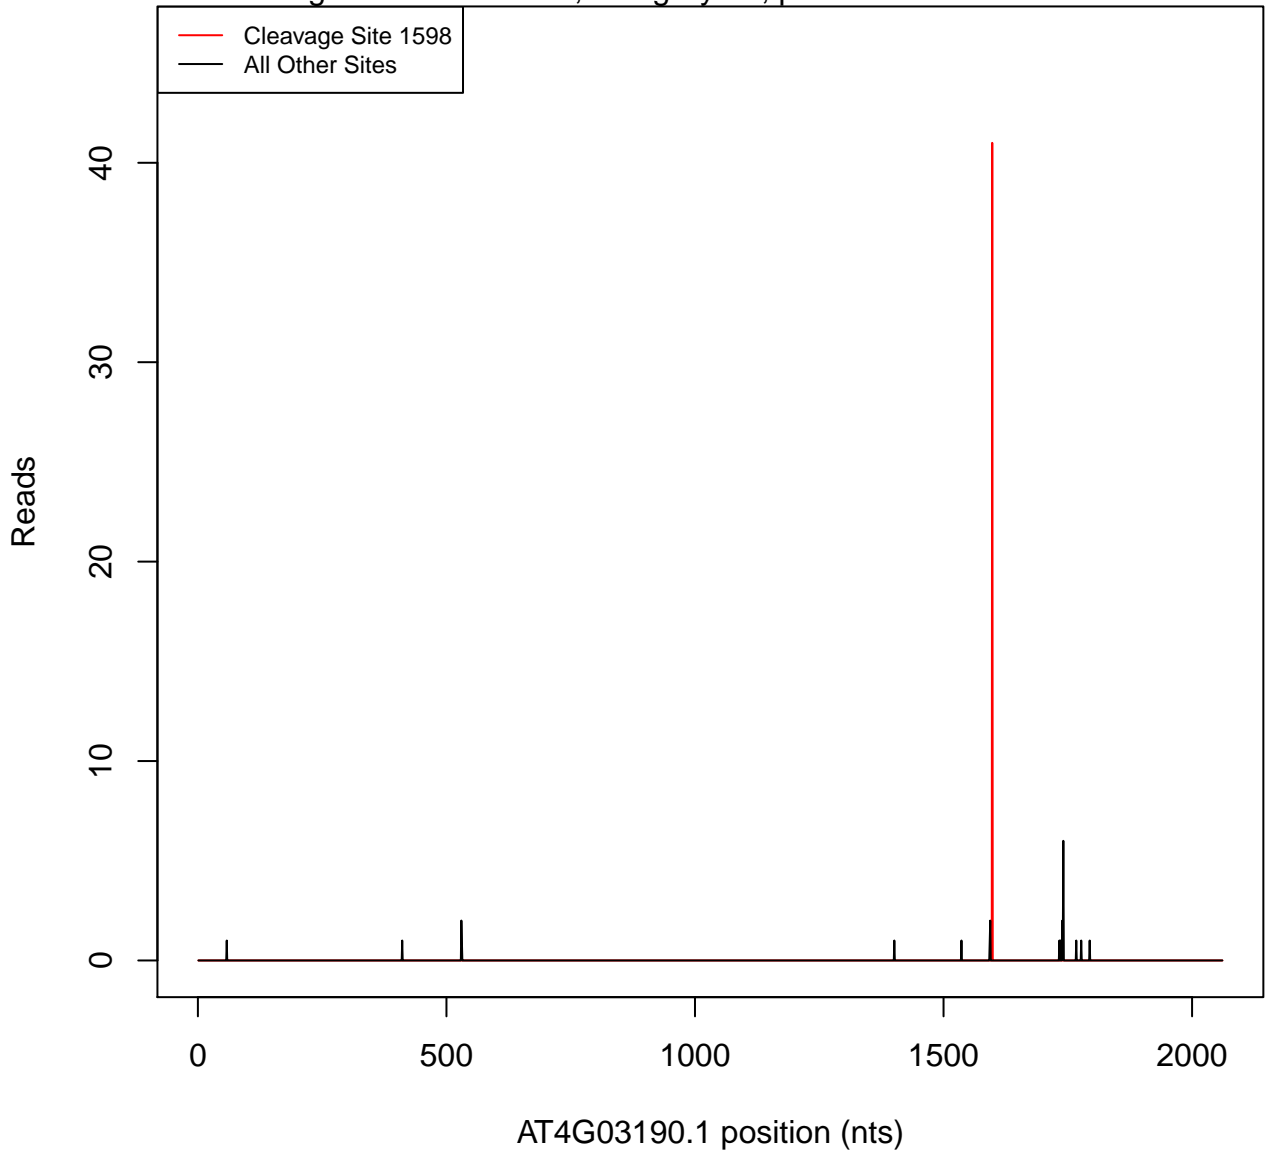

# ath-miR393b slicing AT4G03190.1 at nt 1598

alignment score=3.5 , category=0 , p=0.00168997777427415

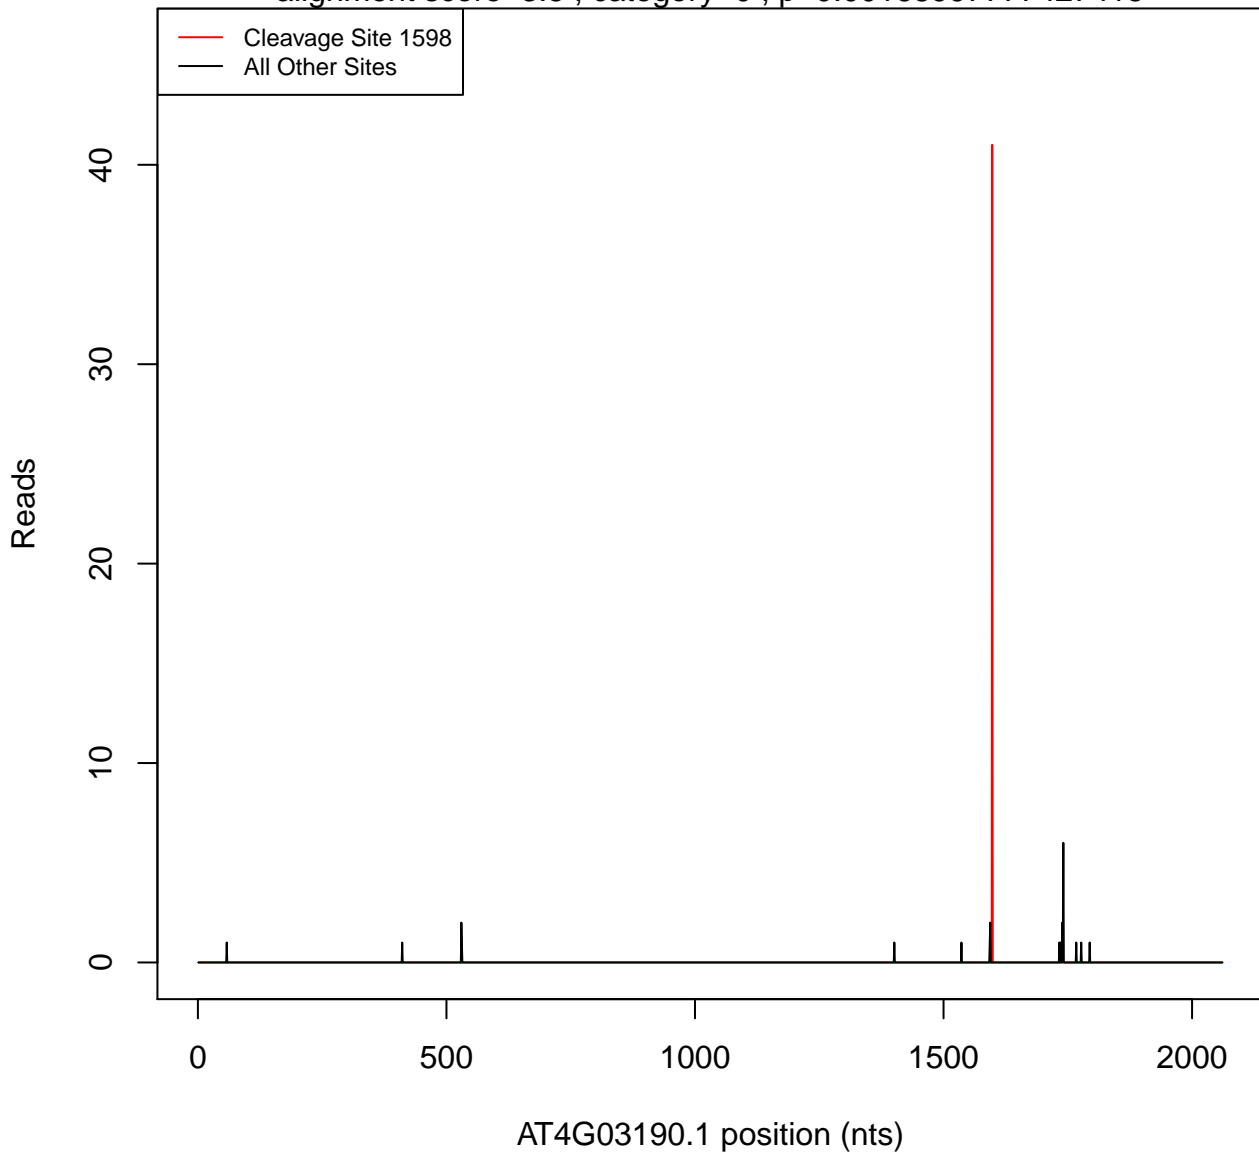

# ath-miR4227 slicing AT4G12650.1 at nt 626

alignment score=3.5 , category=4 , p=0.0449291660883719

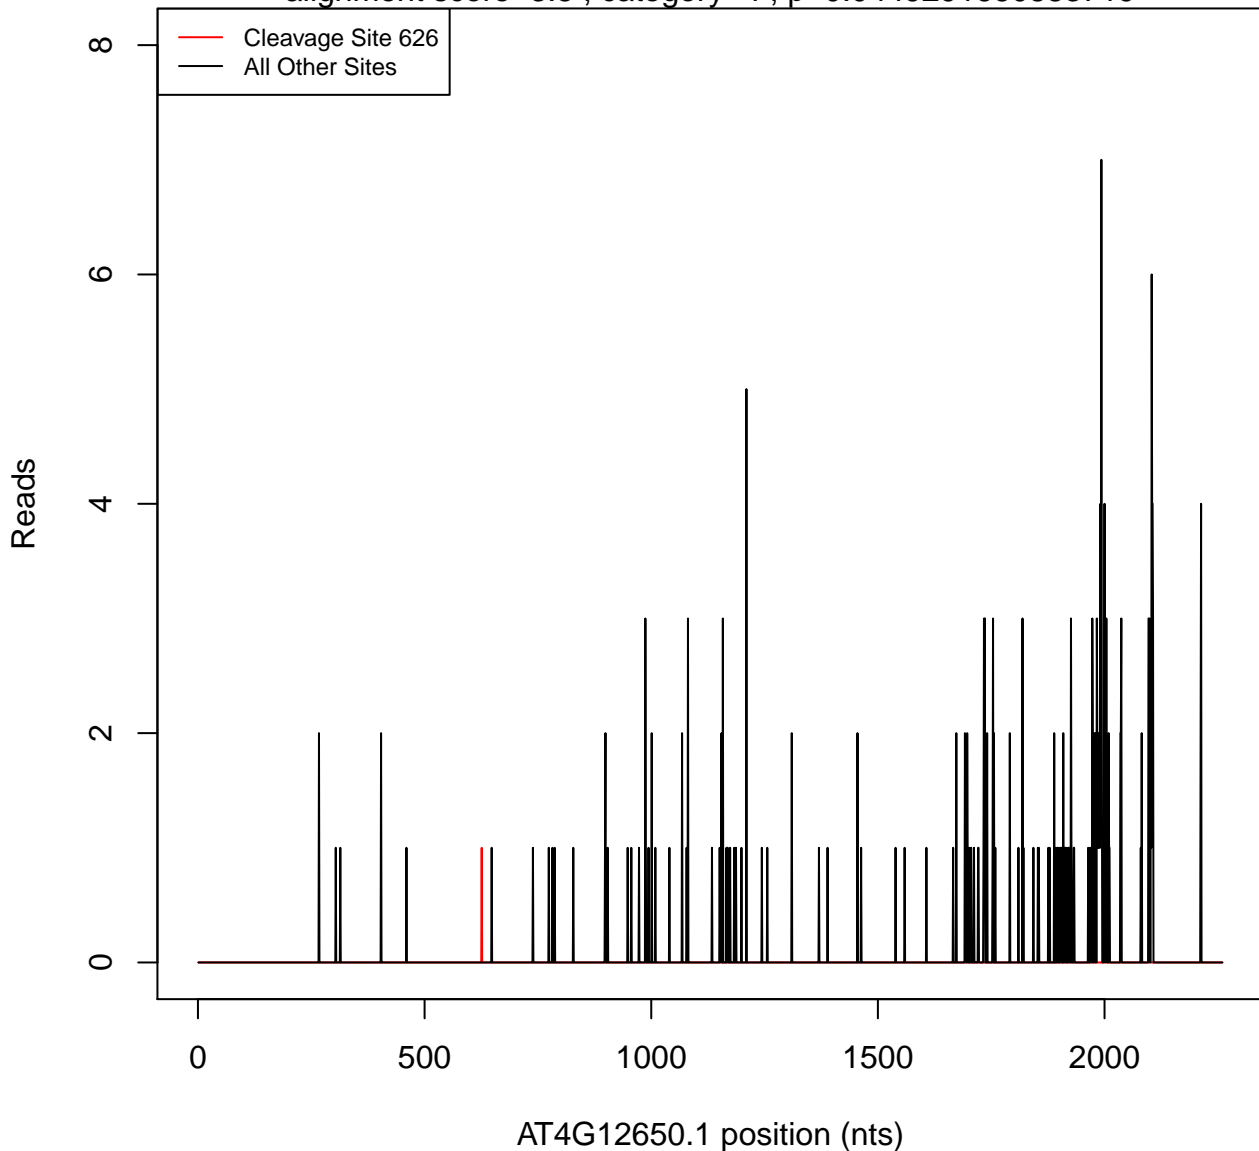

# PC-5p-56 slicing AT4G12800.1 at nt 385

alignment score=1.5 , category=2 , p=0.0422229096938511

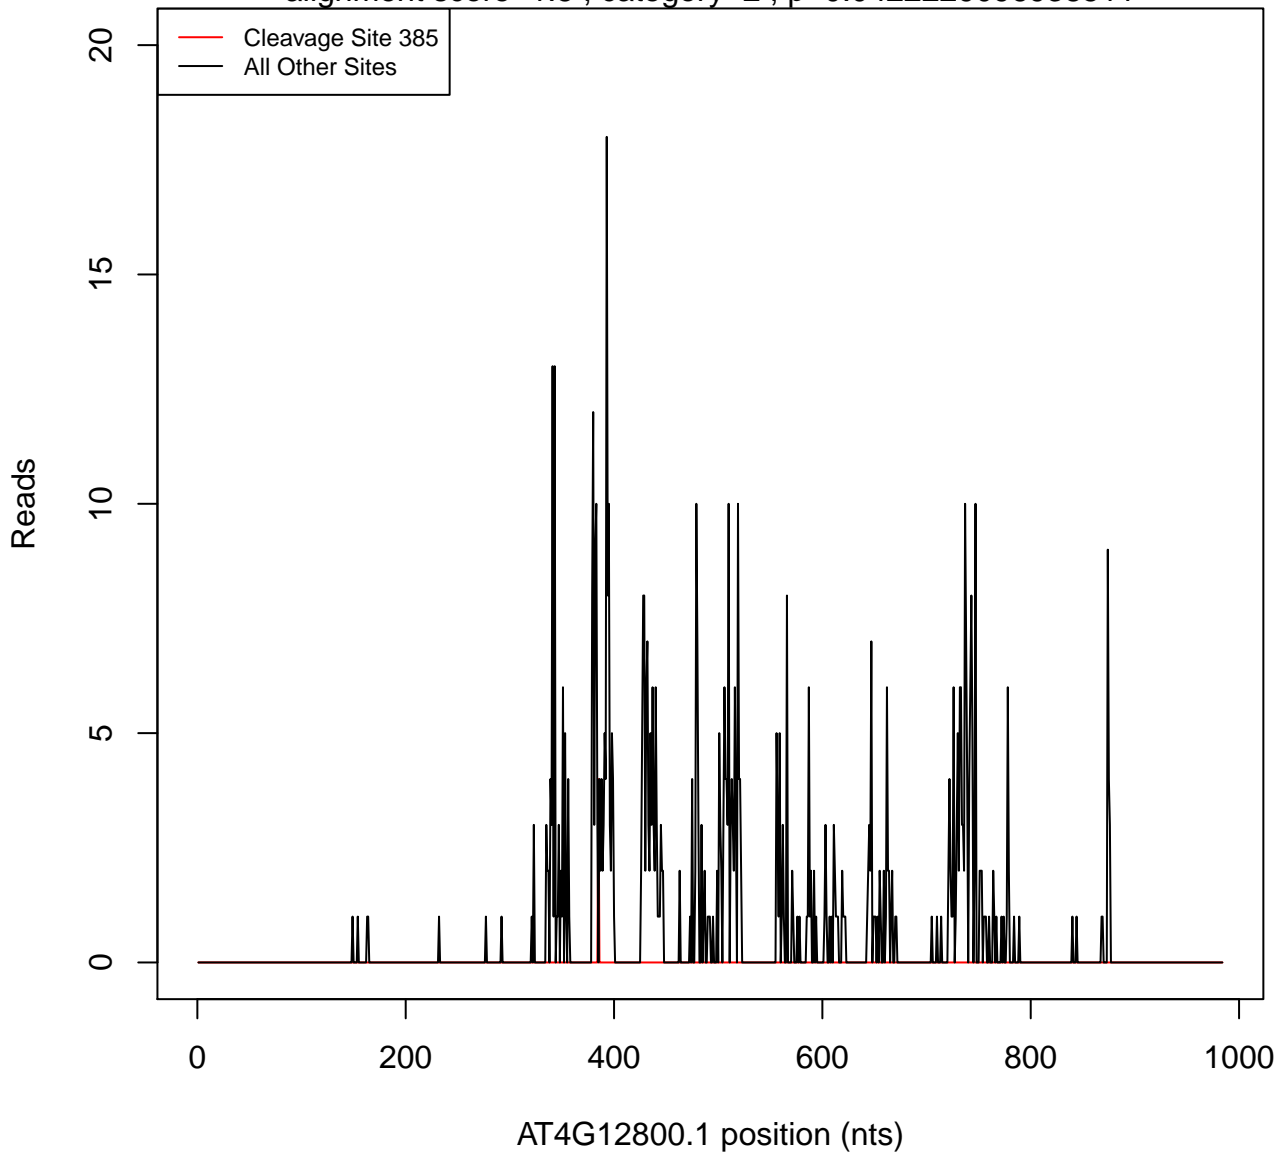

# ath-miR172a slicing AT4G36920.1 at nt 1340

alignment score=2 , category=0 , p=0.00925960406138815

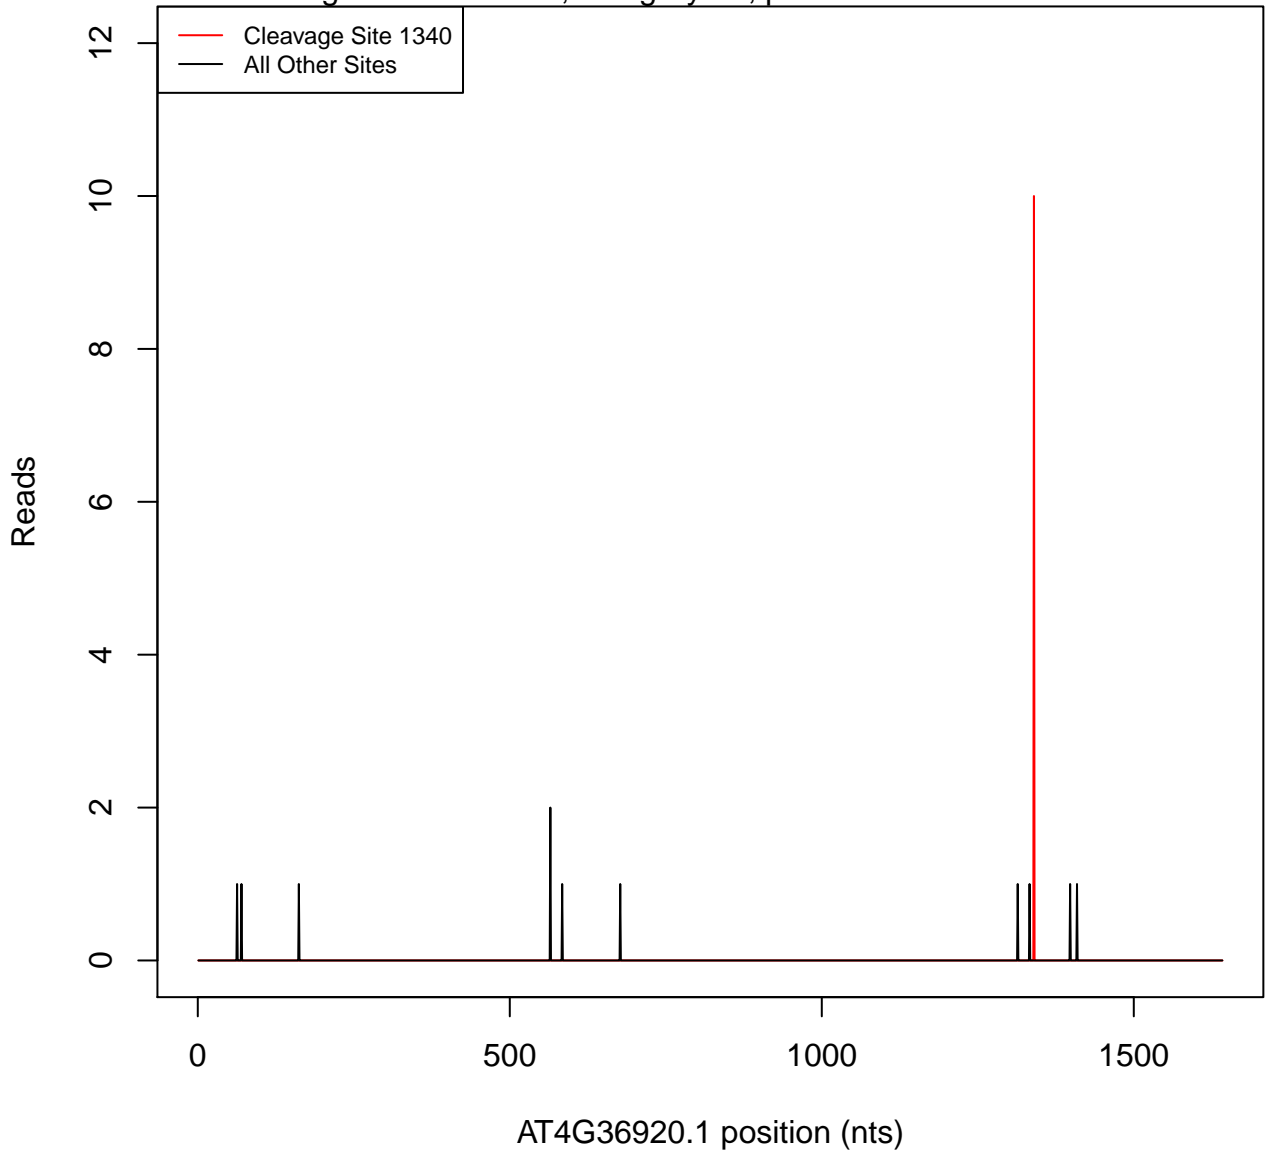



# ath-miR172b slicing AT4G36920.1 at nt 1340

alignment score=2 , category=0 , p=0.00925960406138815

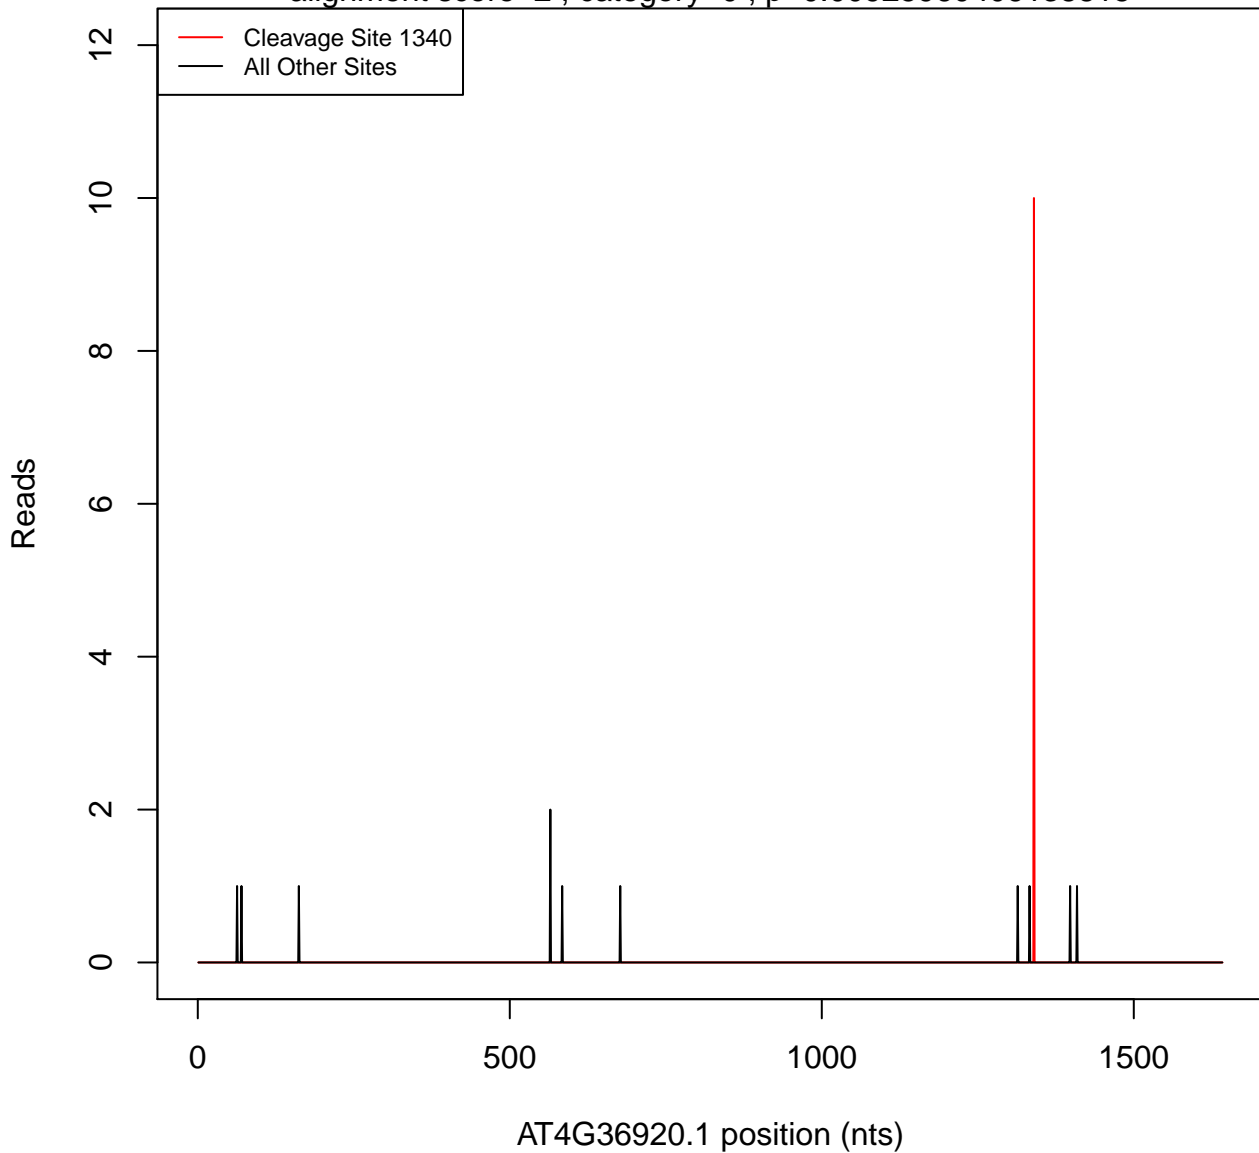

# ath-miR172c slicing AT4G36920.1 at nt 1340

alignment score=1 , category=0 , p=0.00548199277770745

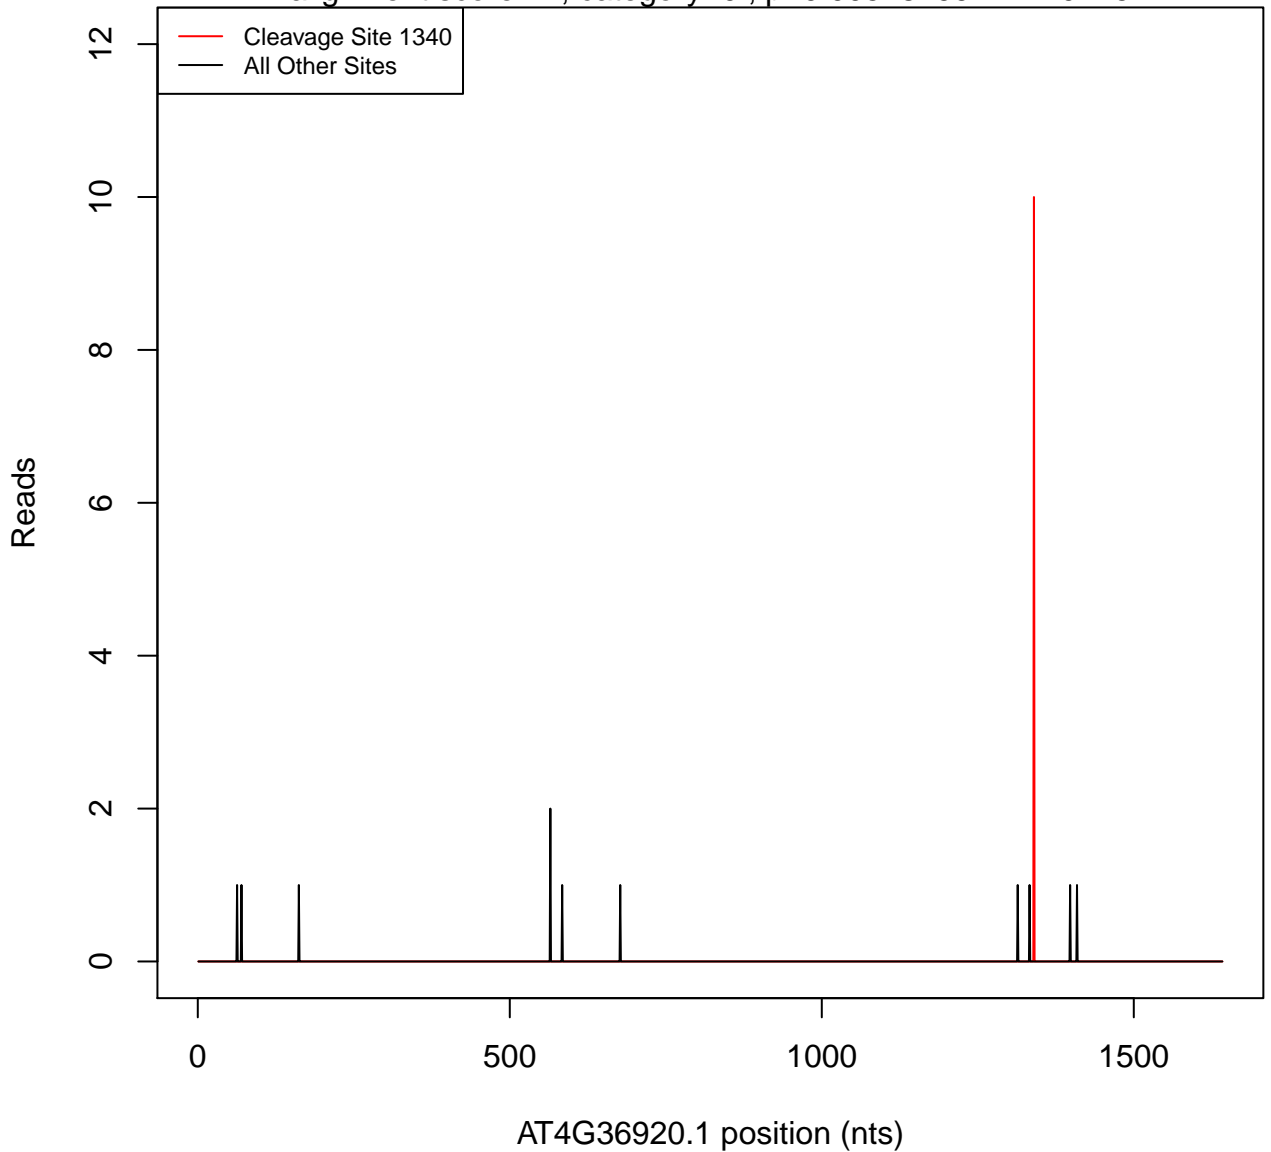

# ath-miR172d slicing AT4G36920.1 at nt 1340

alignment score=1 , category=0 , p=0.00548199277770745

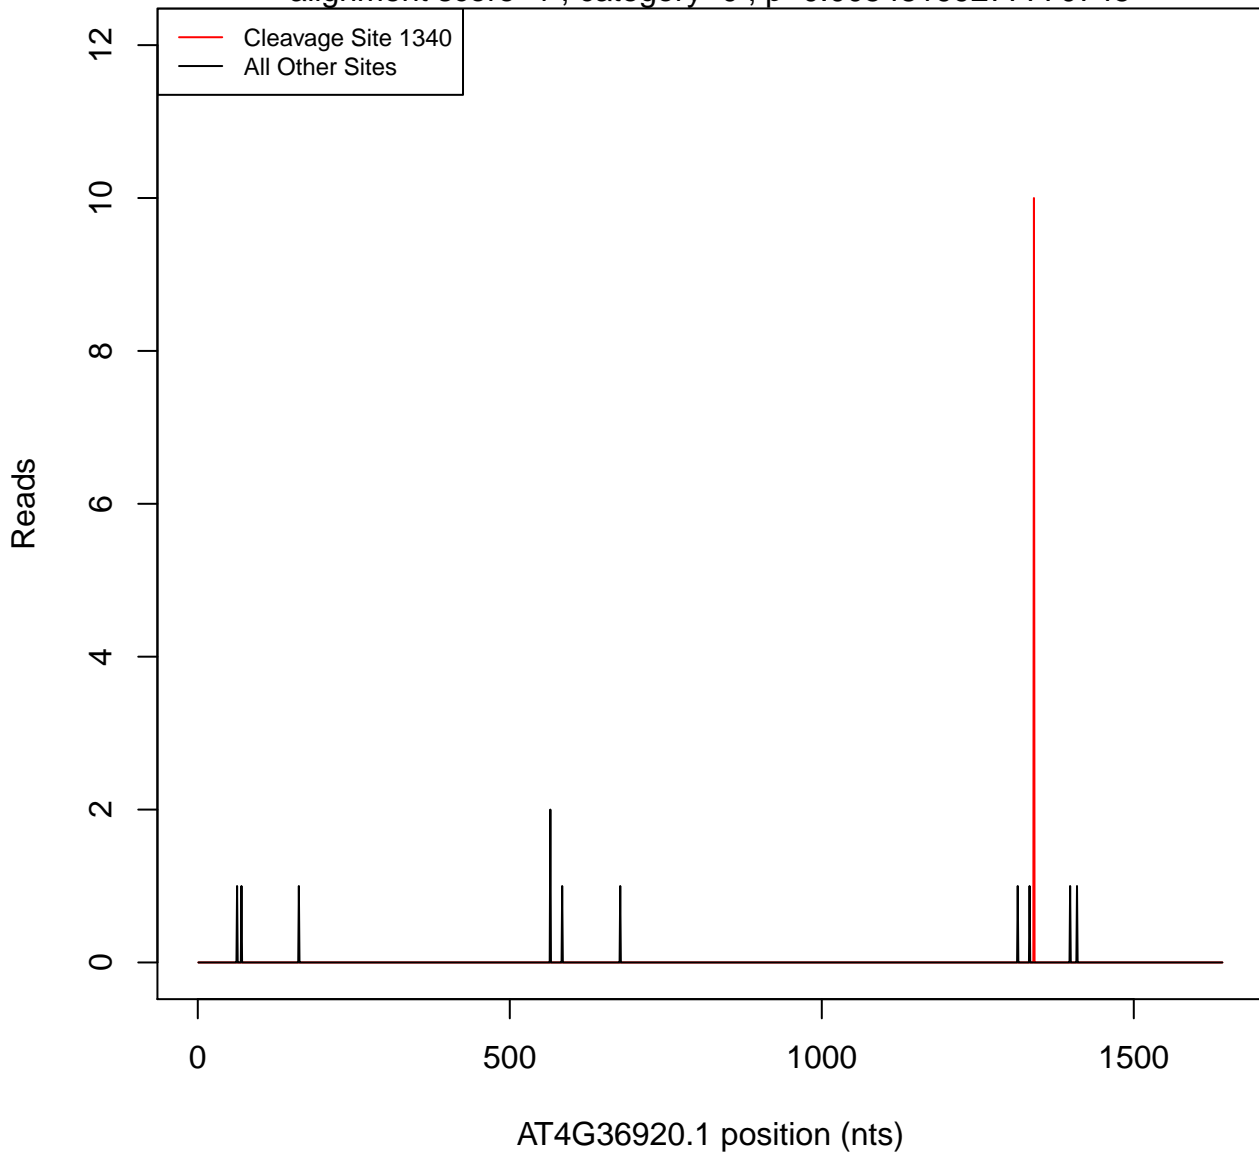

# ath-miR172e slicing AT4G36920.1 at nt 1340

alignment score=2.5 , category=0 , p=0.0167718341080048

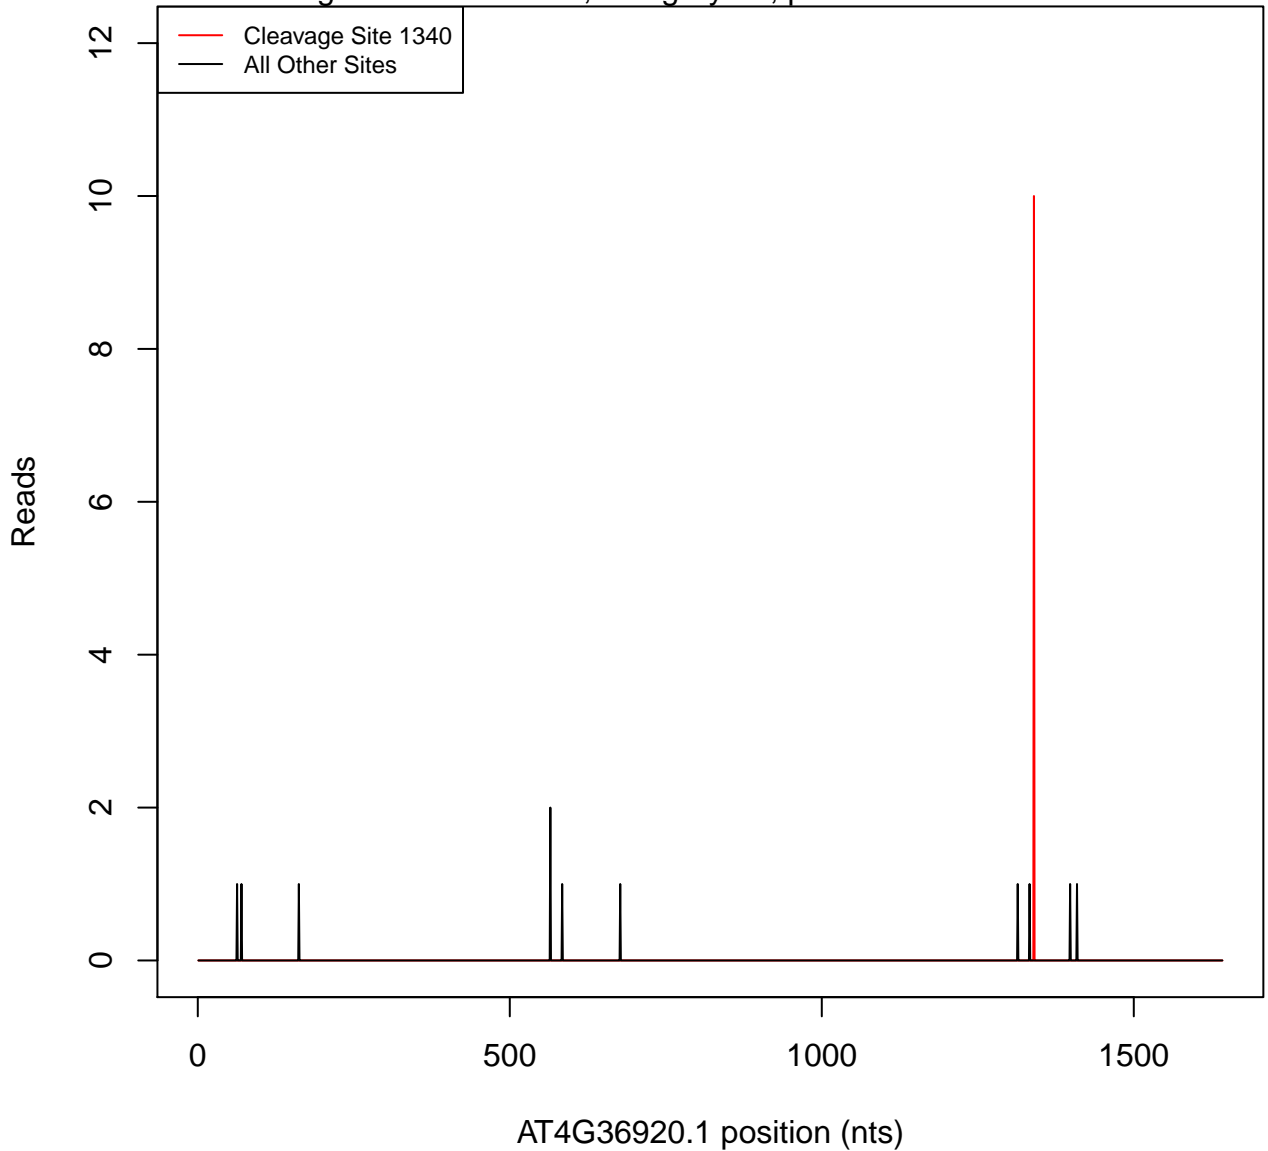

# ath-miR172a slicing AT4G36920.2 at nt 1304

alignment score=2 , category=0 , p=0.00925960406138815

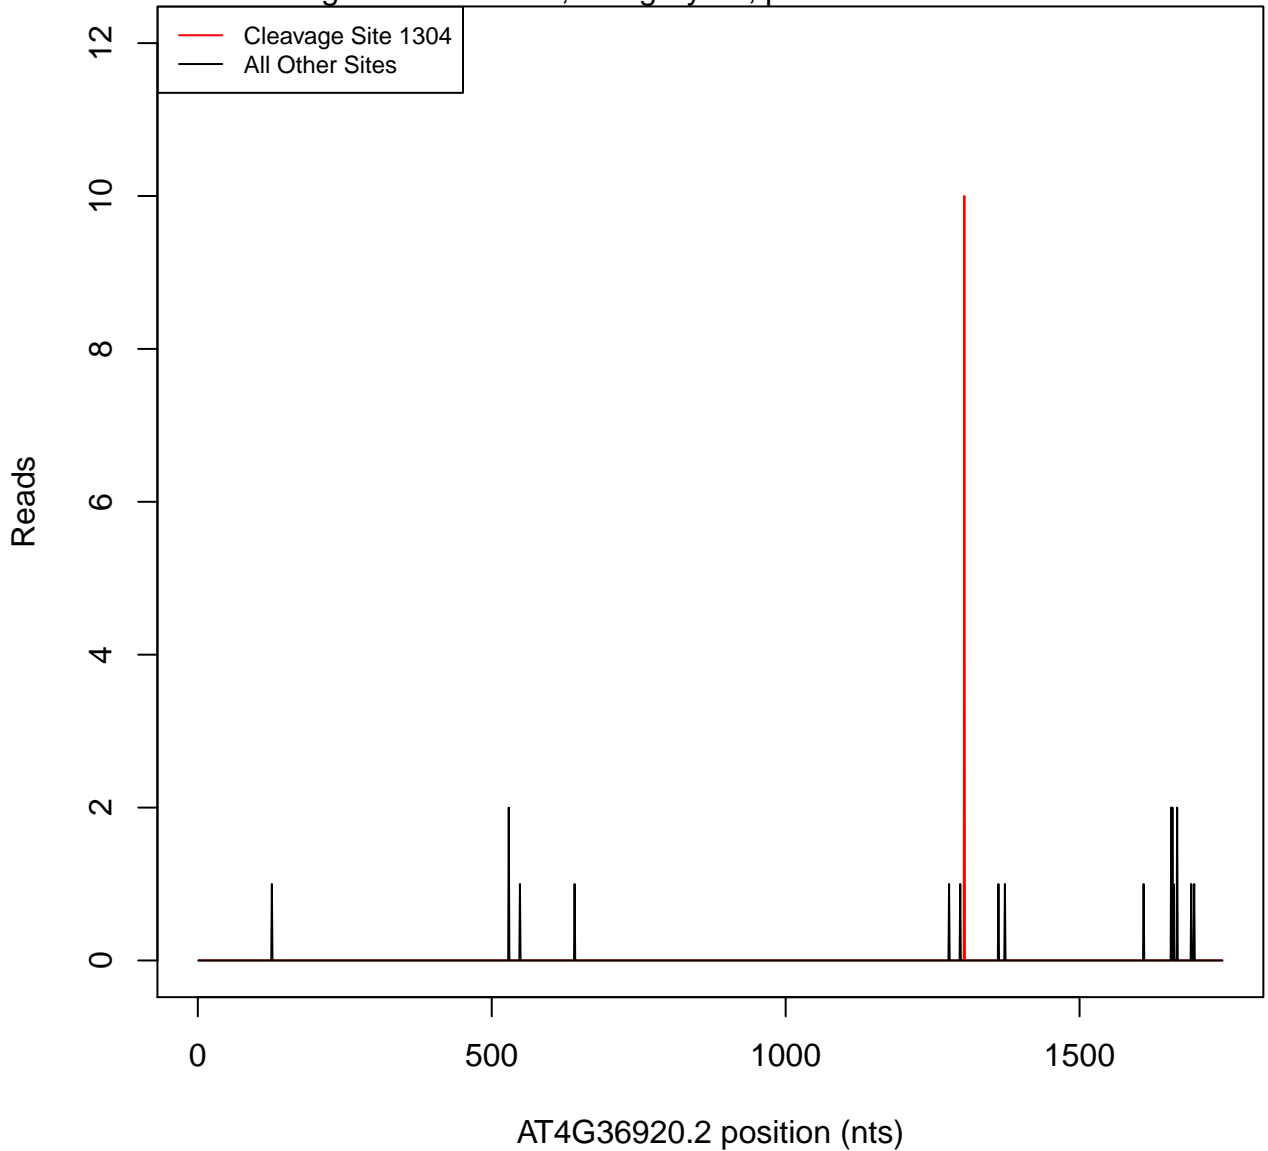

# ath-miR172b slicing AT4G36920.2 at nt 1304

alignment score=2 , category=0 , p=0.00925960406138815

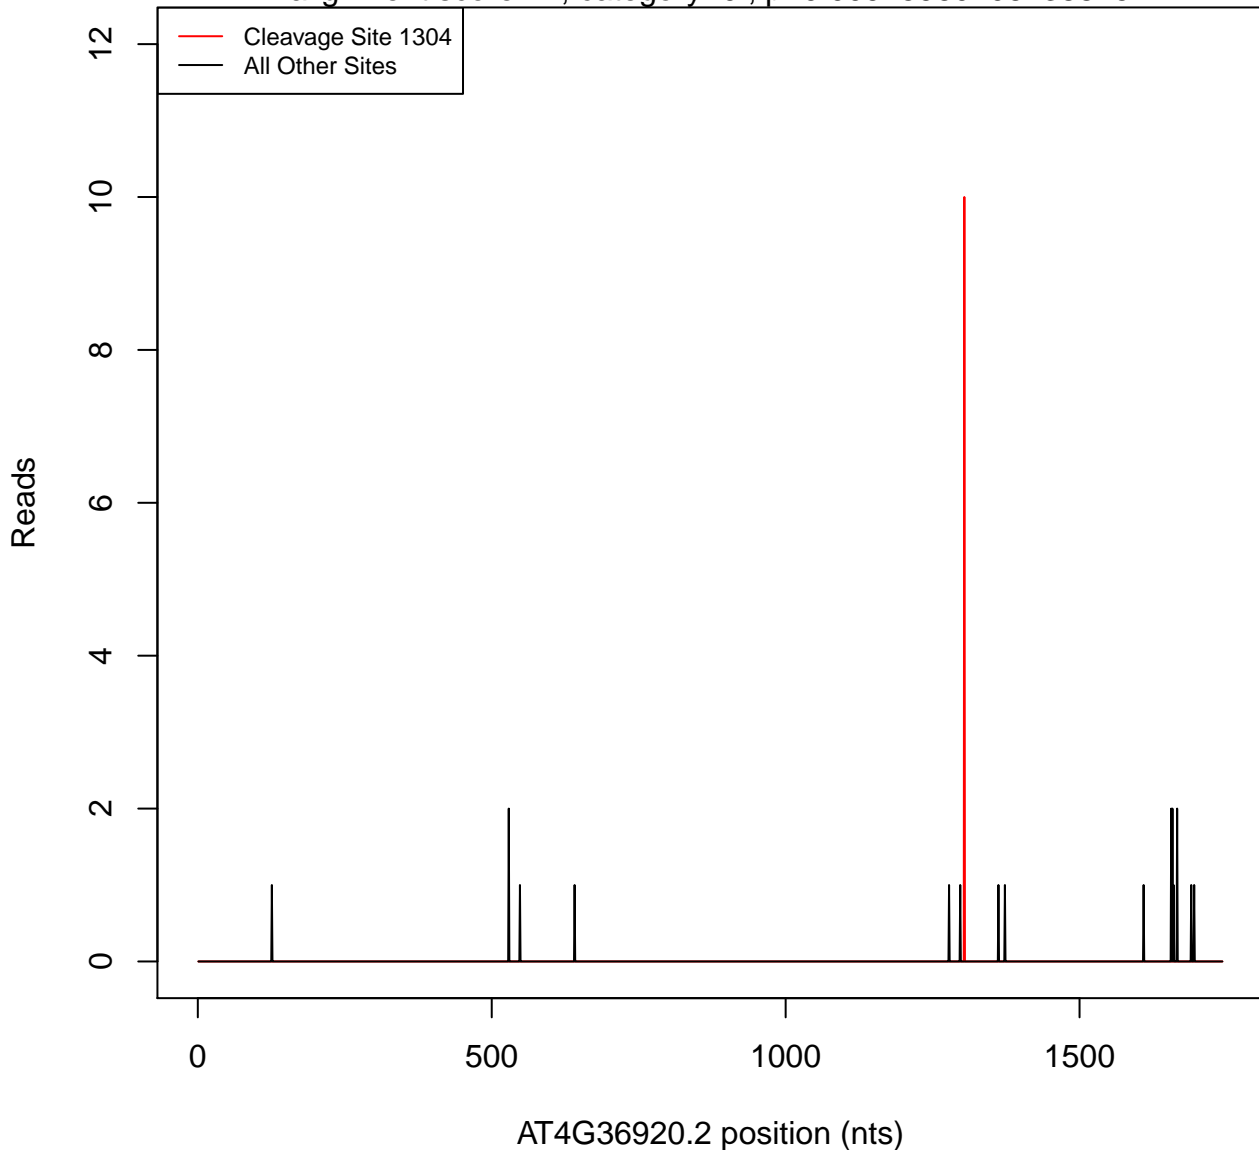

# ath-miR172c slicing AT4G36920.2 at nt 1304

alignment score=1 , category=0 , p=0.00548199277770745



# ath-miR172d slicing AT4G36920.2 at nt 1304

alignment score=1 , category=0 , p=0.00548199277770745

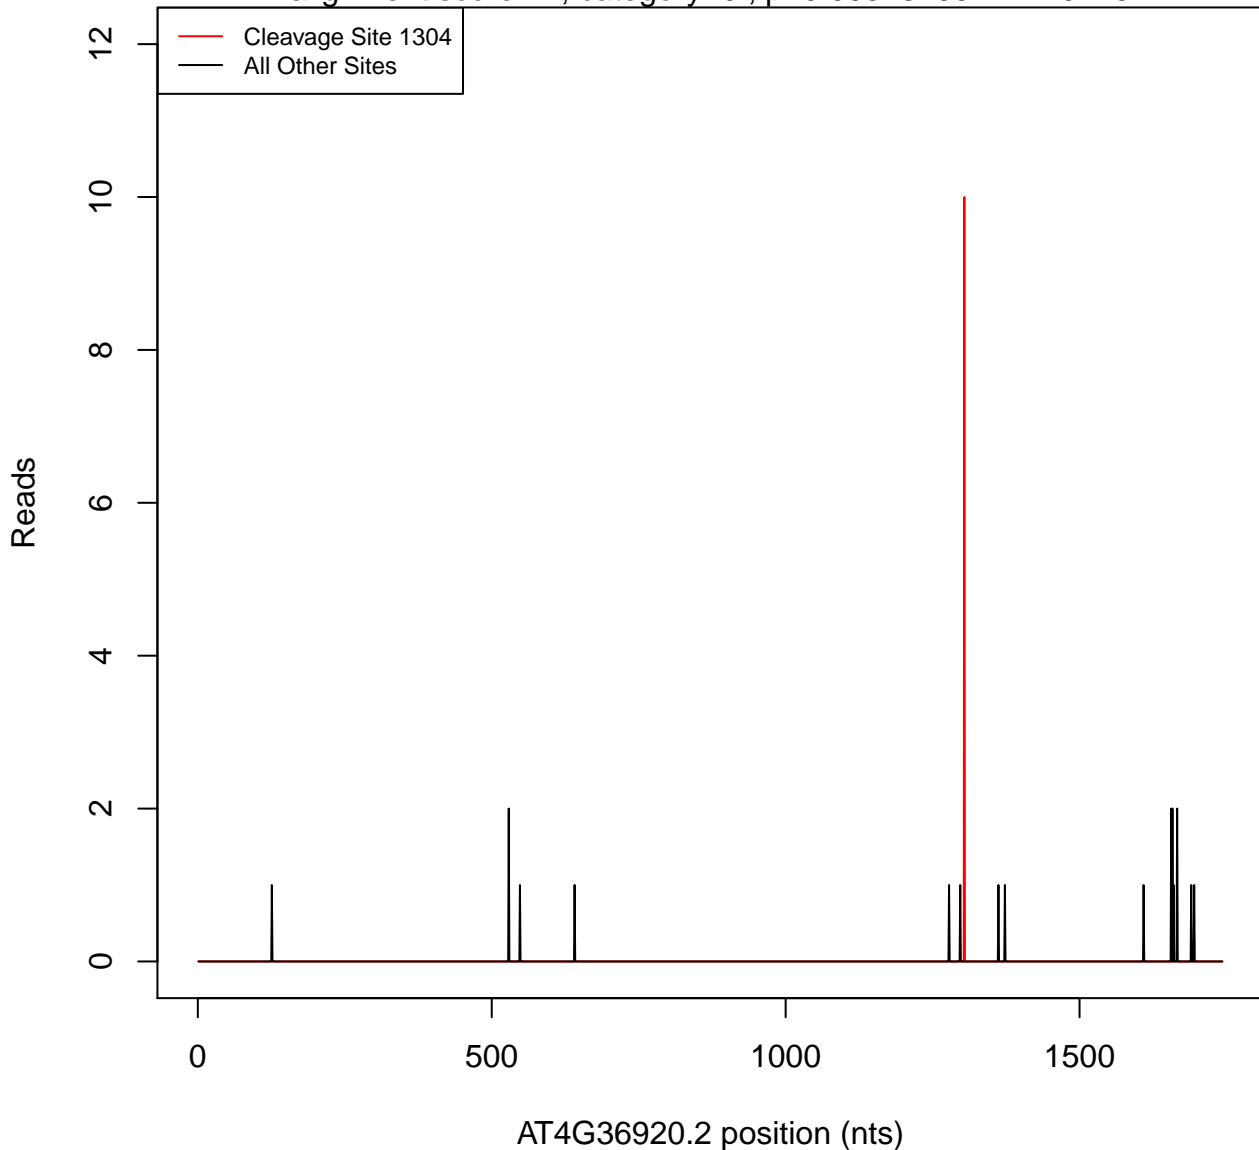



# ath-miR172e slicing AT4G36920.2 at nt 1304

alignment score=2.5 , category=0 , p=0.0167718341080048

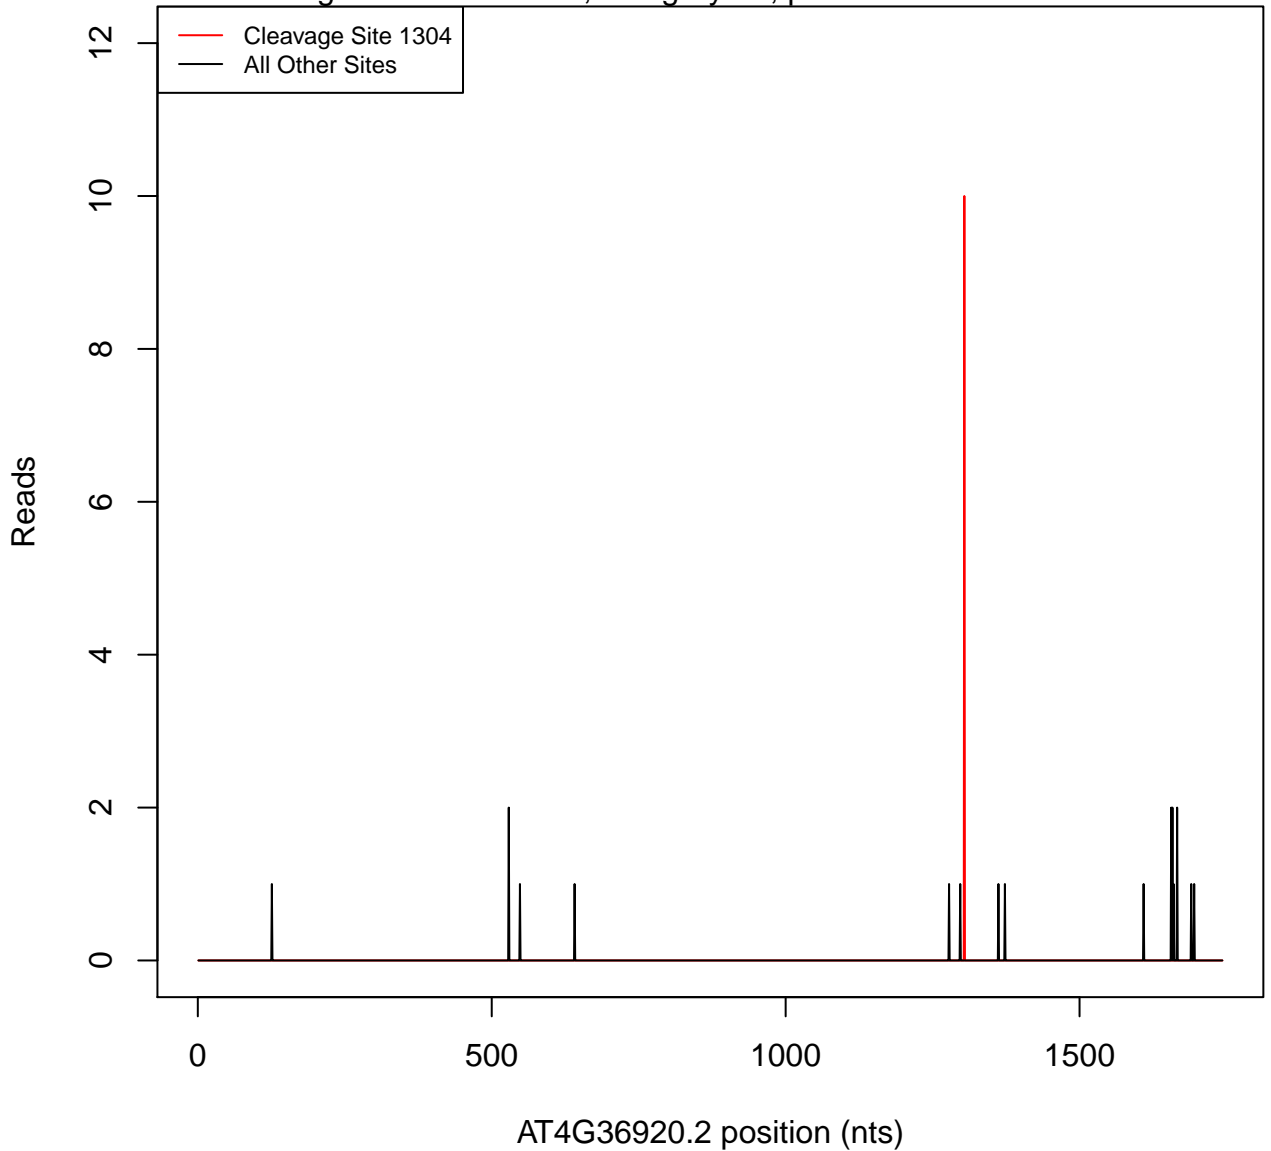

# ahy-miR159\_1ss7TC slicing AT5G06100.1 at nt 1172

alignment score=3.5 , category=1 , p=0.00773423857972566

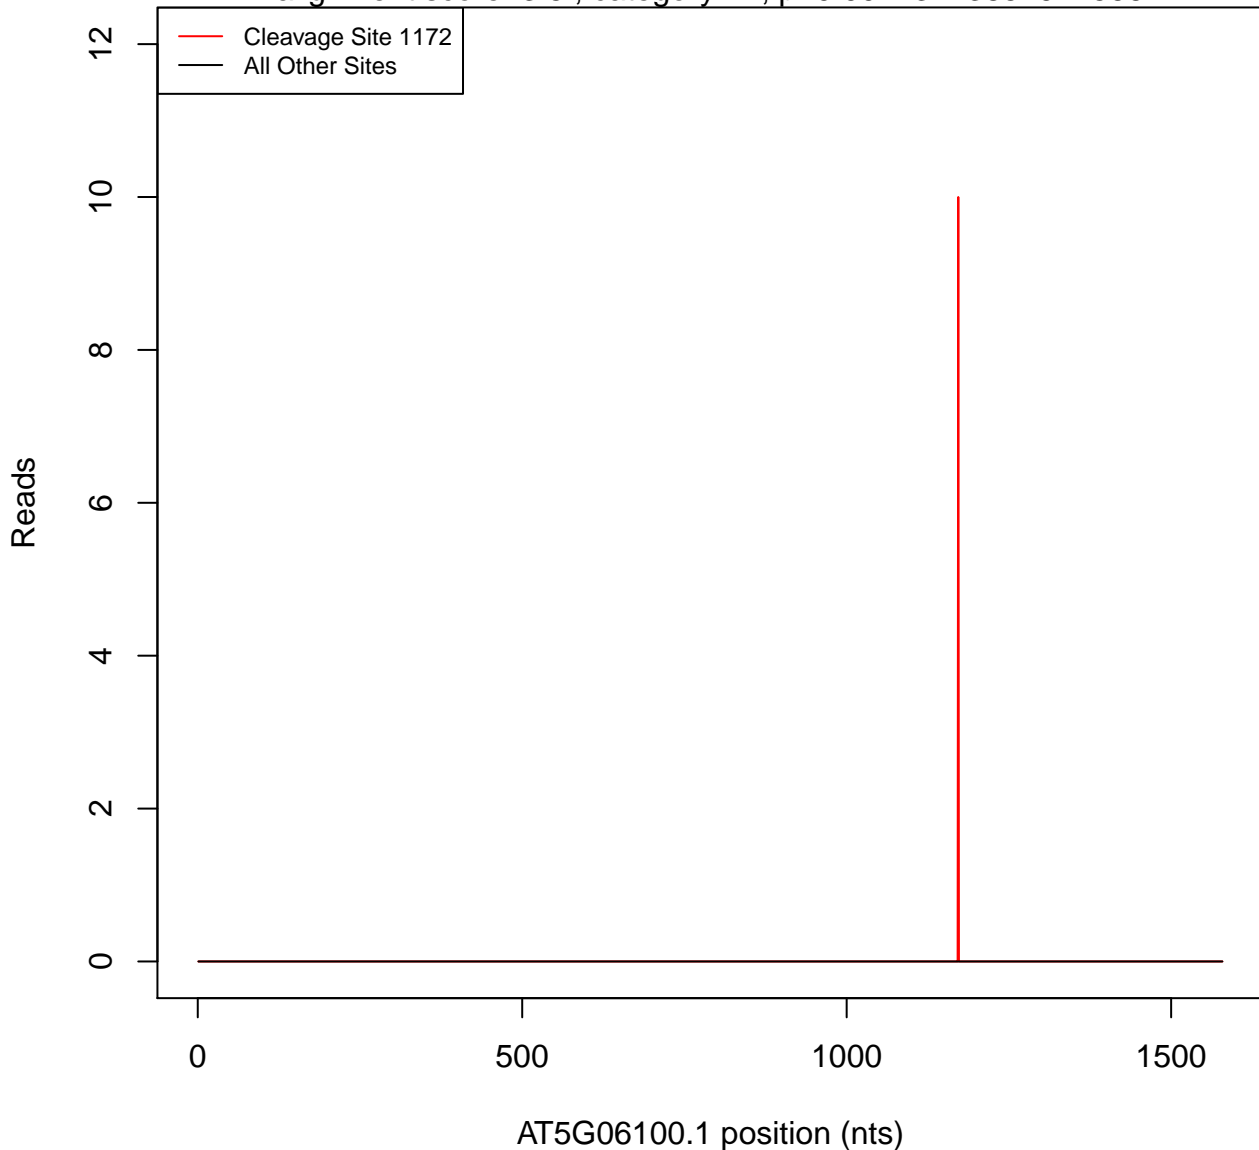

# ath-miR159a slicing AT5G06100.1 at nt 1172

alignment score=3.5 , category=1 , p=0.00927389322554639

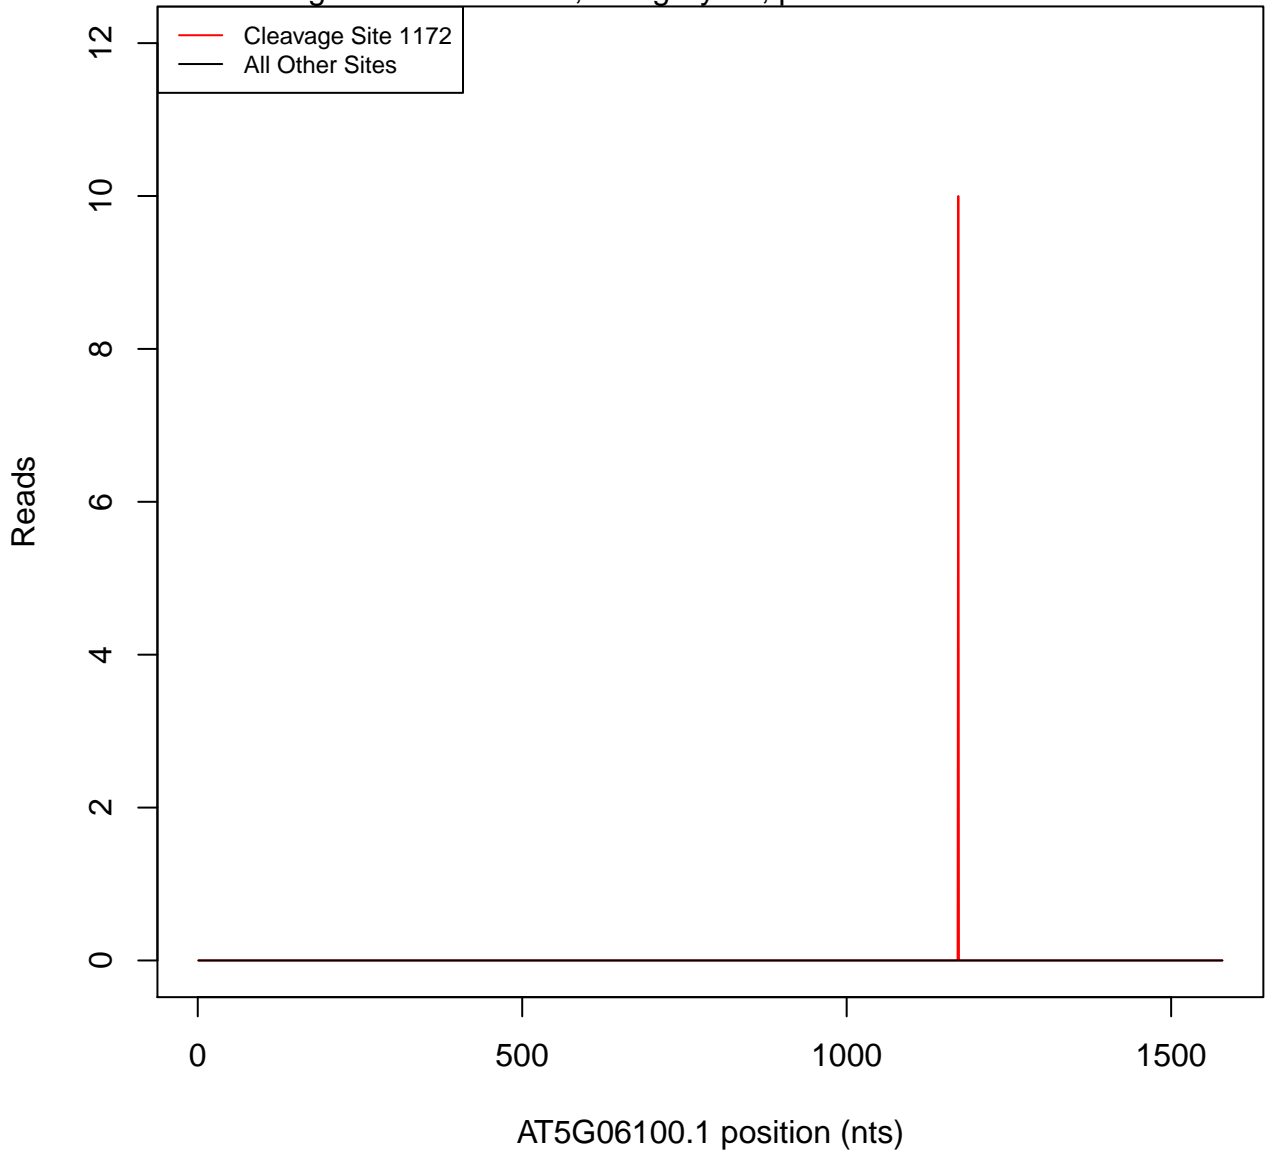

# ath-miR159b\_R-1 slicing AT5G06100.1 at nt 1172

alignment score=3.5 , category=1 , p=0.0169364053025027

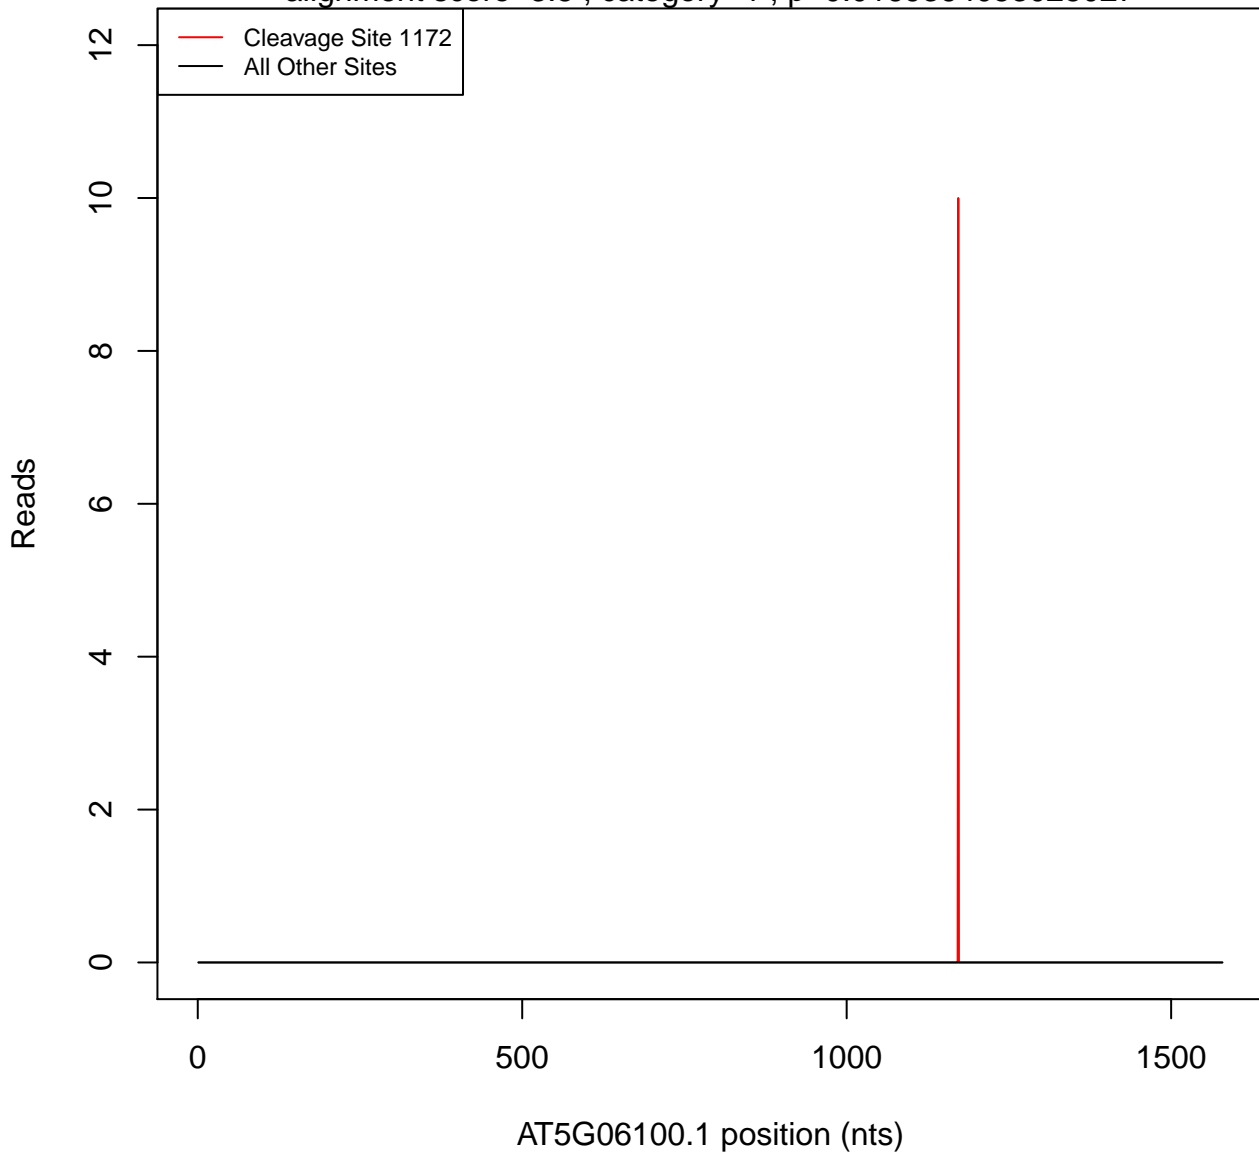

# ath-miR159c slicing AT5G06100.1 at nt 1172

alignment score=4 , category=1 , p=0.0228340661497719

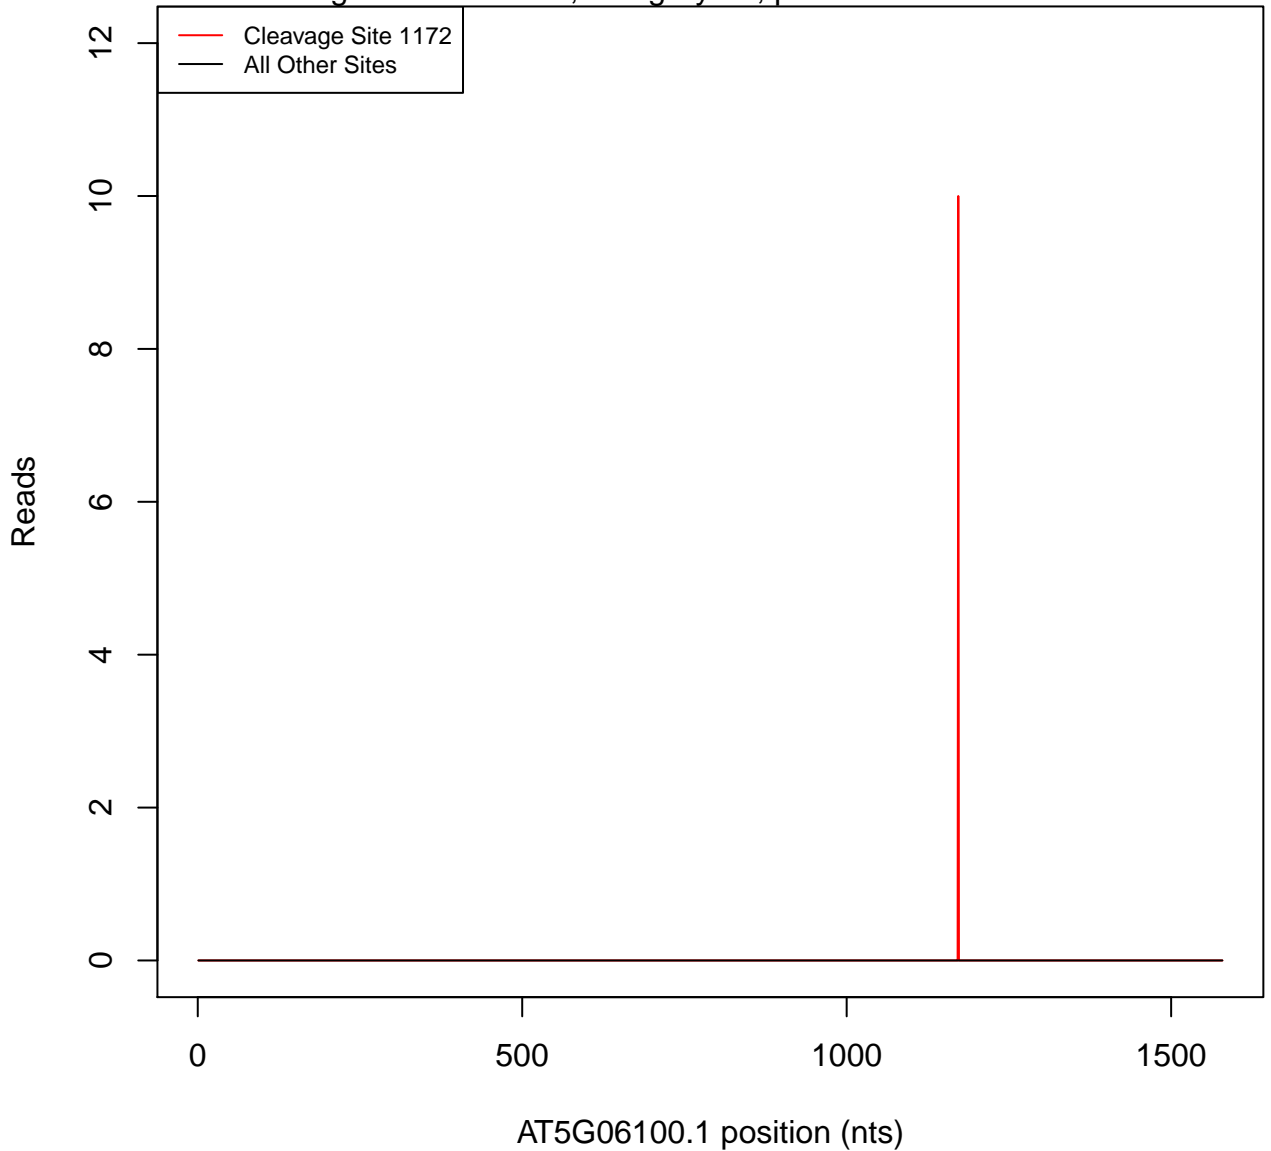

# ath-miR159c\_R-2 slicing AT5G06100.1 at nt 1172

alignment score=3 , category=1 , p=0.0377041117385082

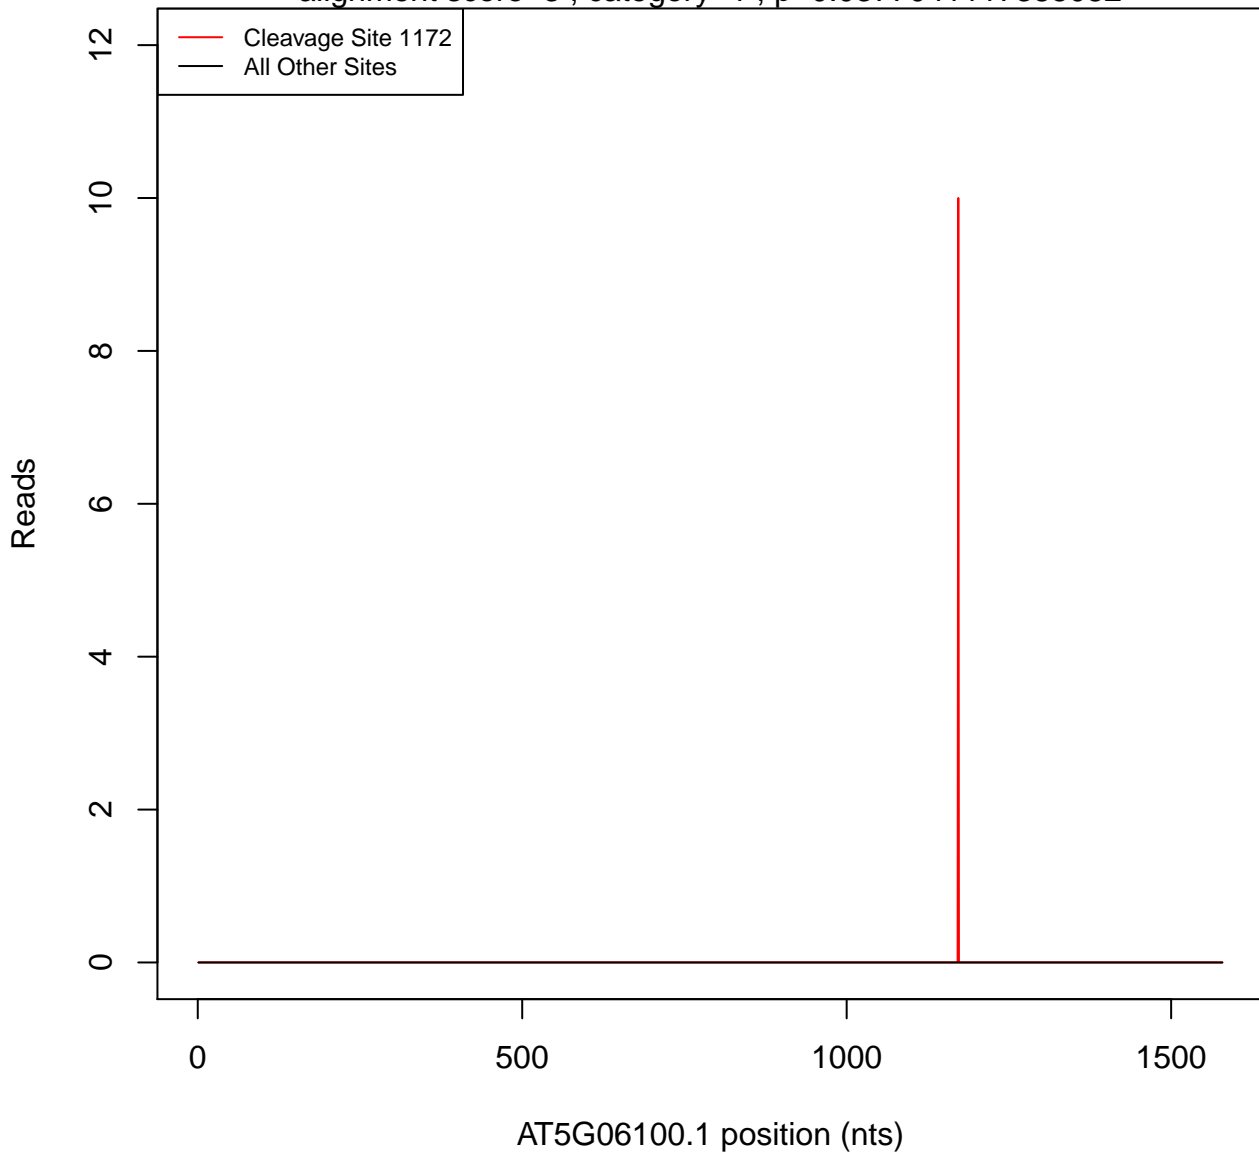

# ath-miR319c\_L+1R-1 slicing AT5G06100.1 at nt 1172

alignment score=4 , category=1 , p=0.0254859156190184

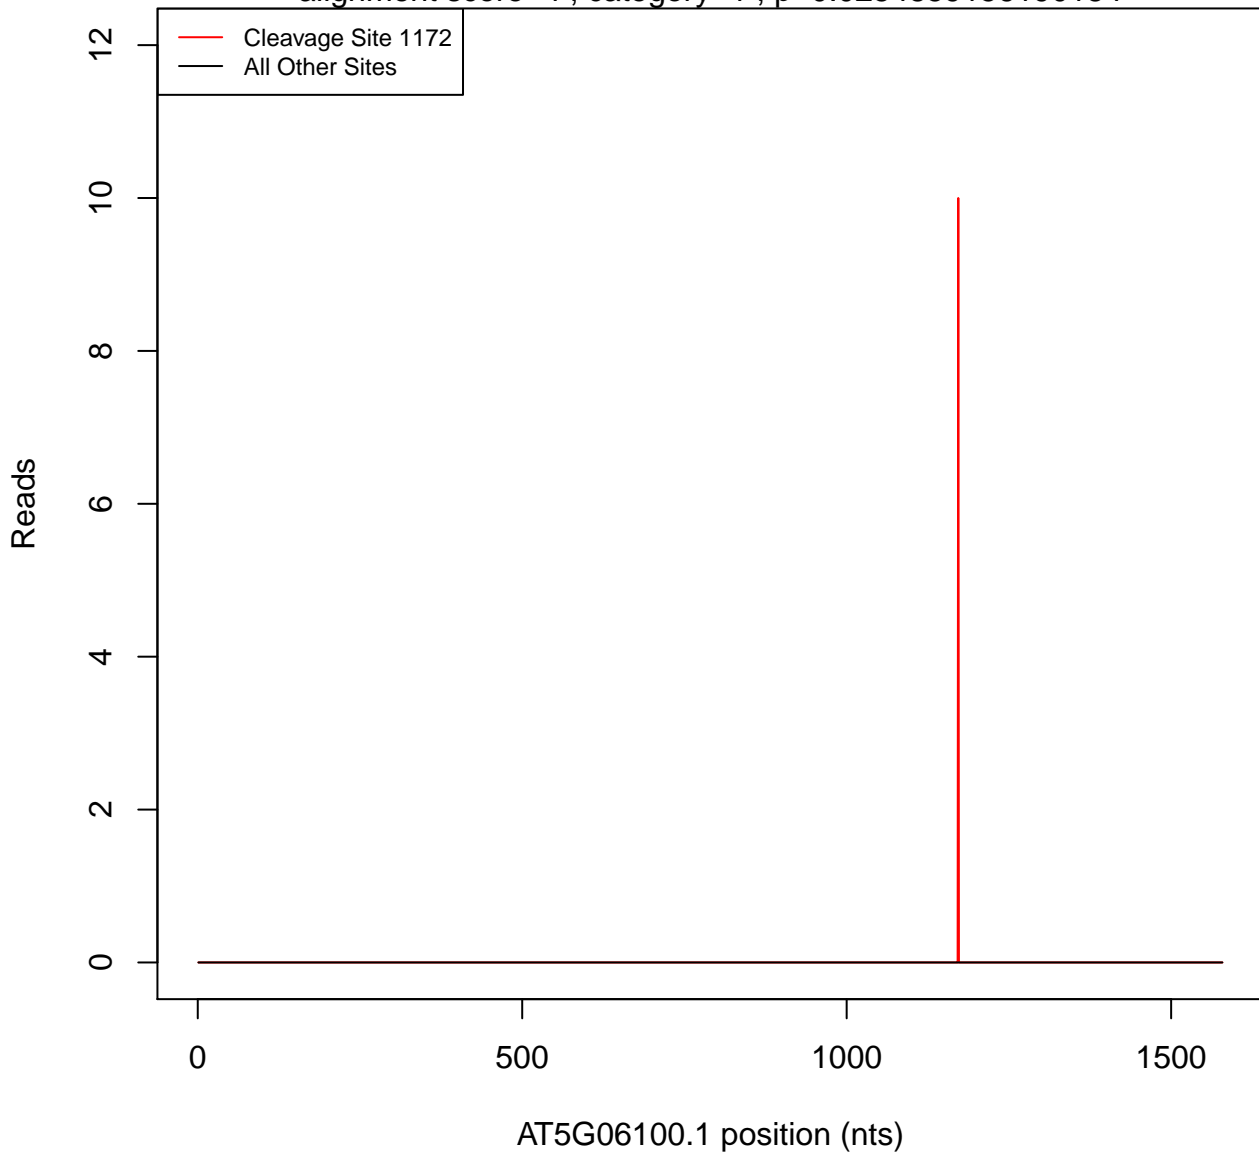

# ahy-miR159\_1ss7TC slicing AT5G06100.2 at nt 1172

alignment score=3.5 , category=1 , p=0.00773423857972566

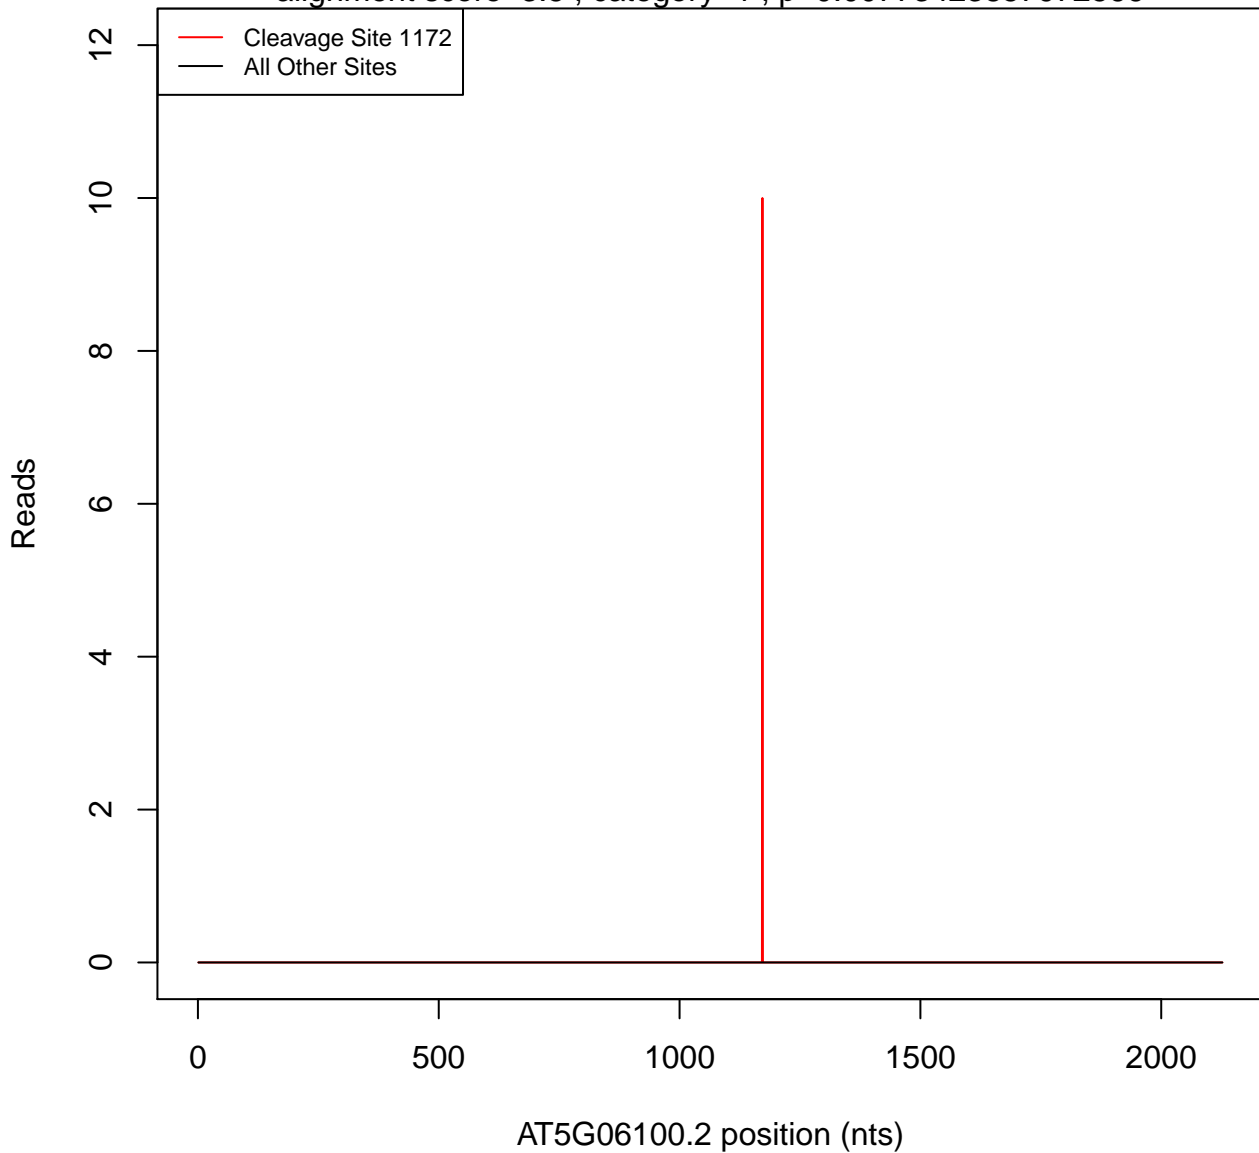



# ath-miR159a slicing AT5G06100.2 at nt 1172

alignment score=3.5 , category=1 , p=0.00927389322554639

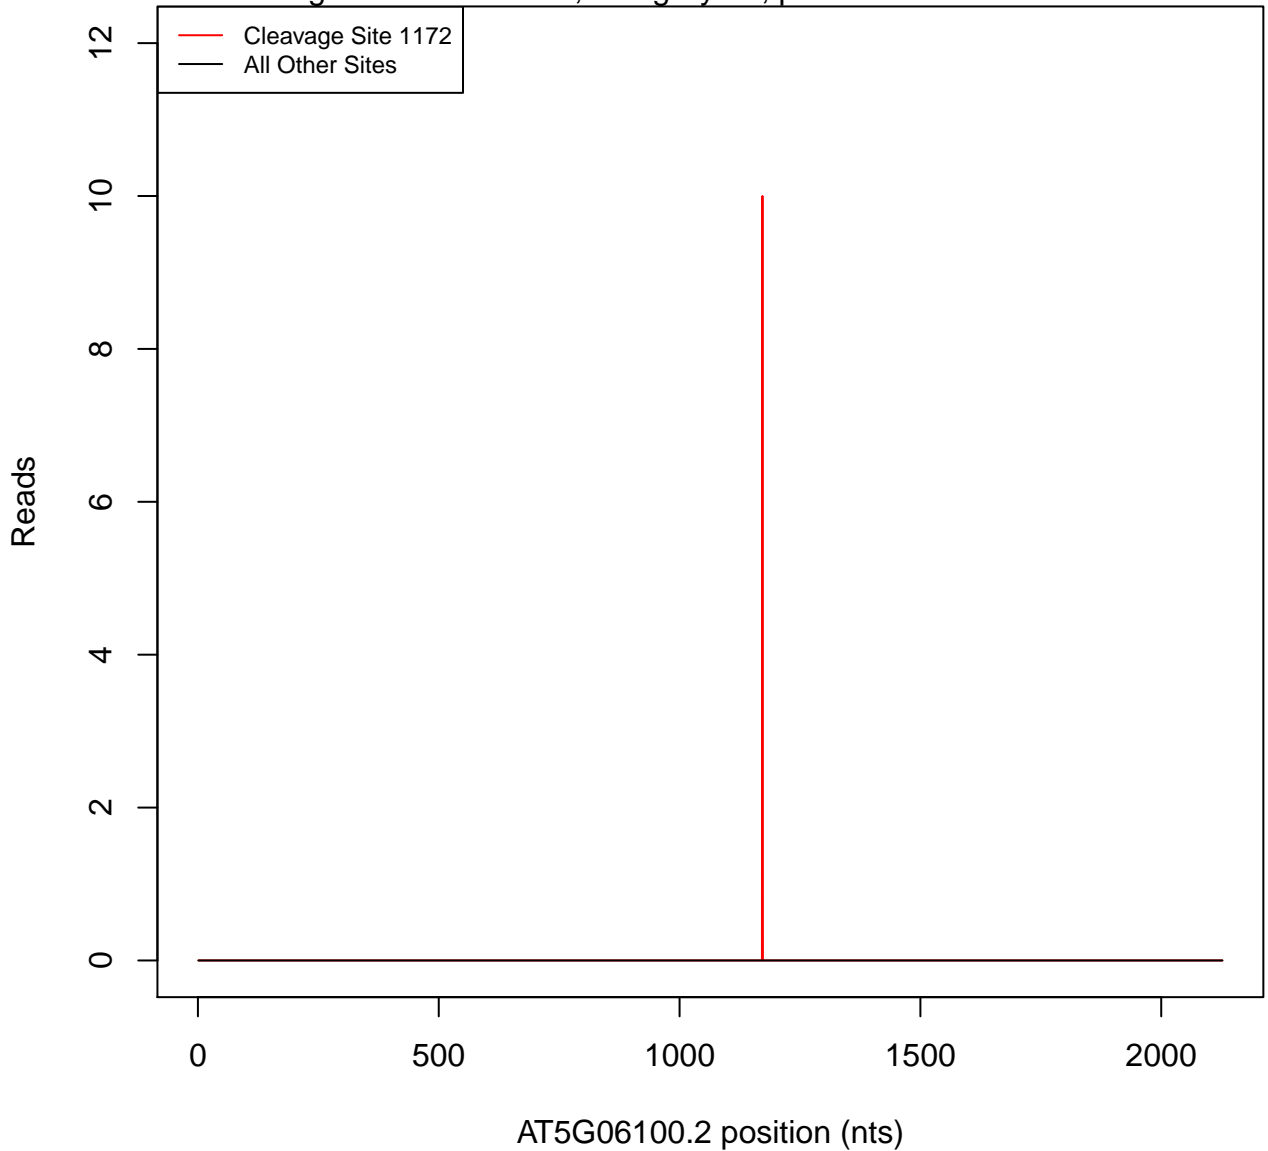

# ath-miR159b\_R-1 slicing AT5G06100.2 at nt 1172

alignment score=3.5 , category=1 , p=0.0169364053025027

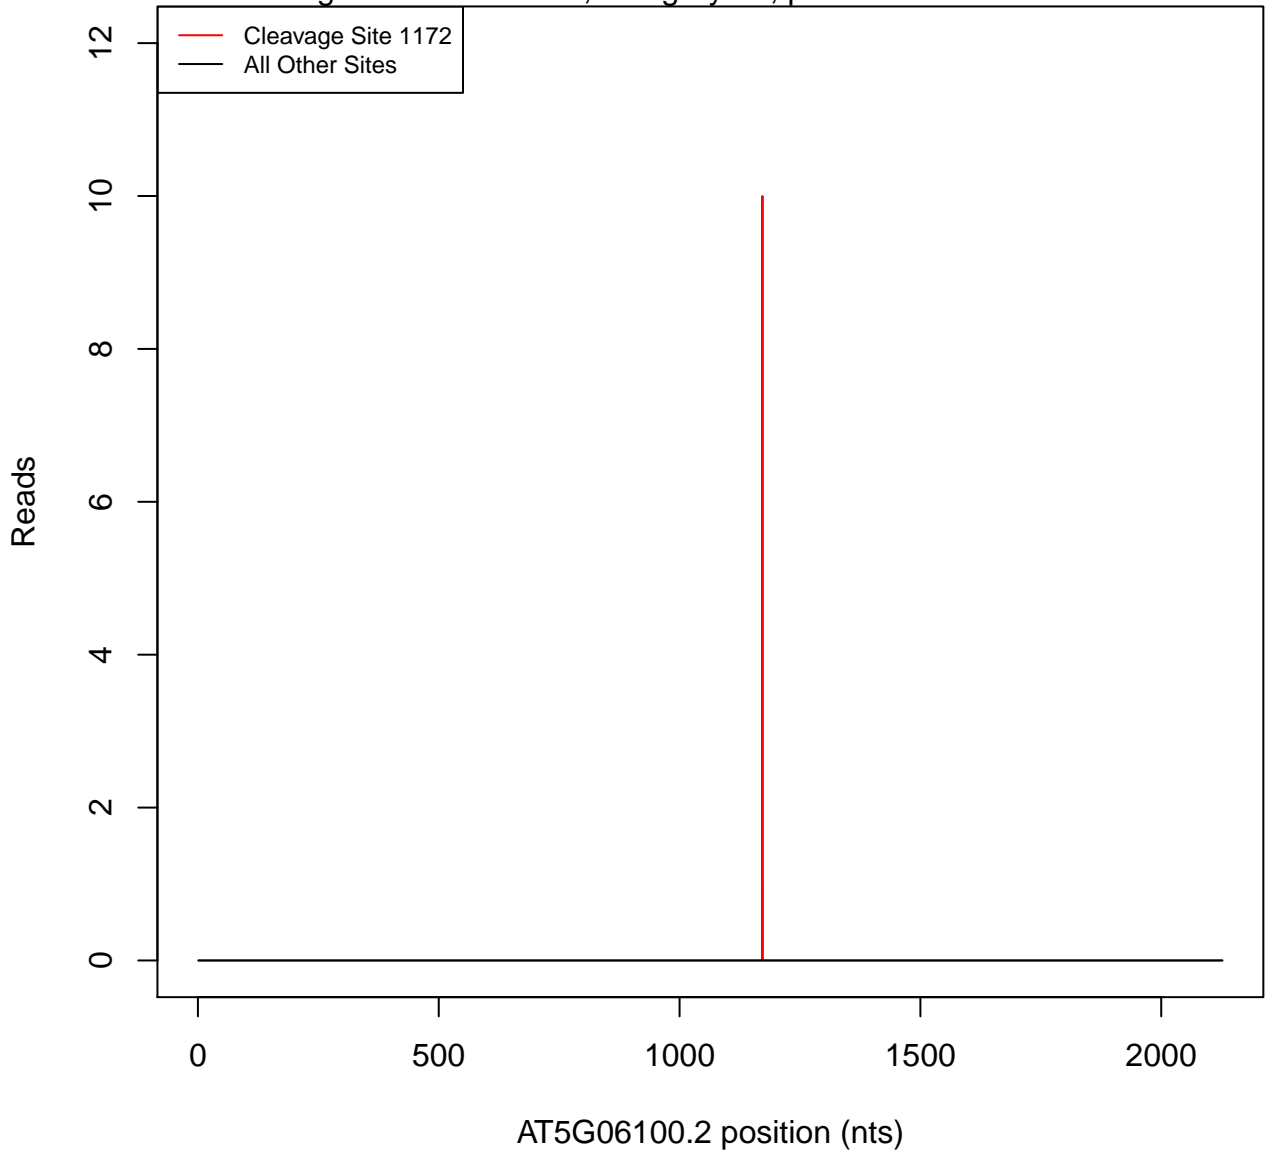

# ath-miR159c slicing AT5G06100.2 at nt 1172

alignment score=4 , category=1 , p=0.0228340661497719

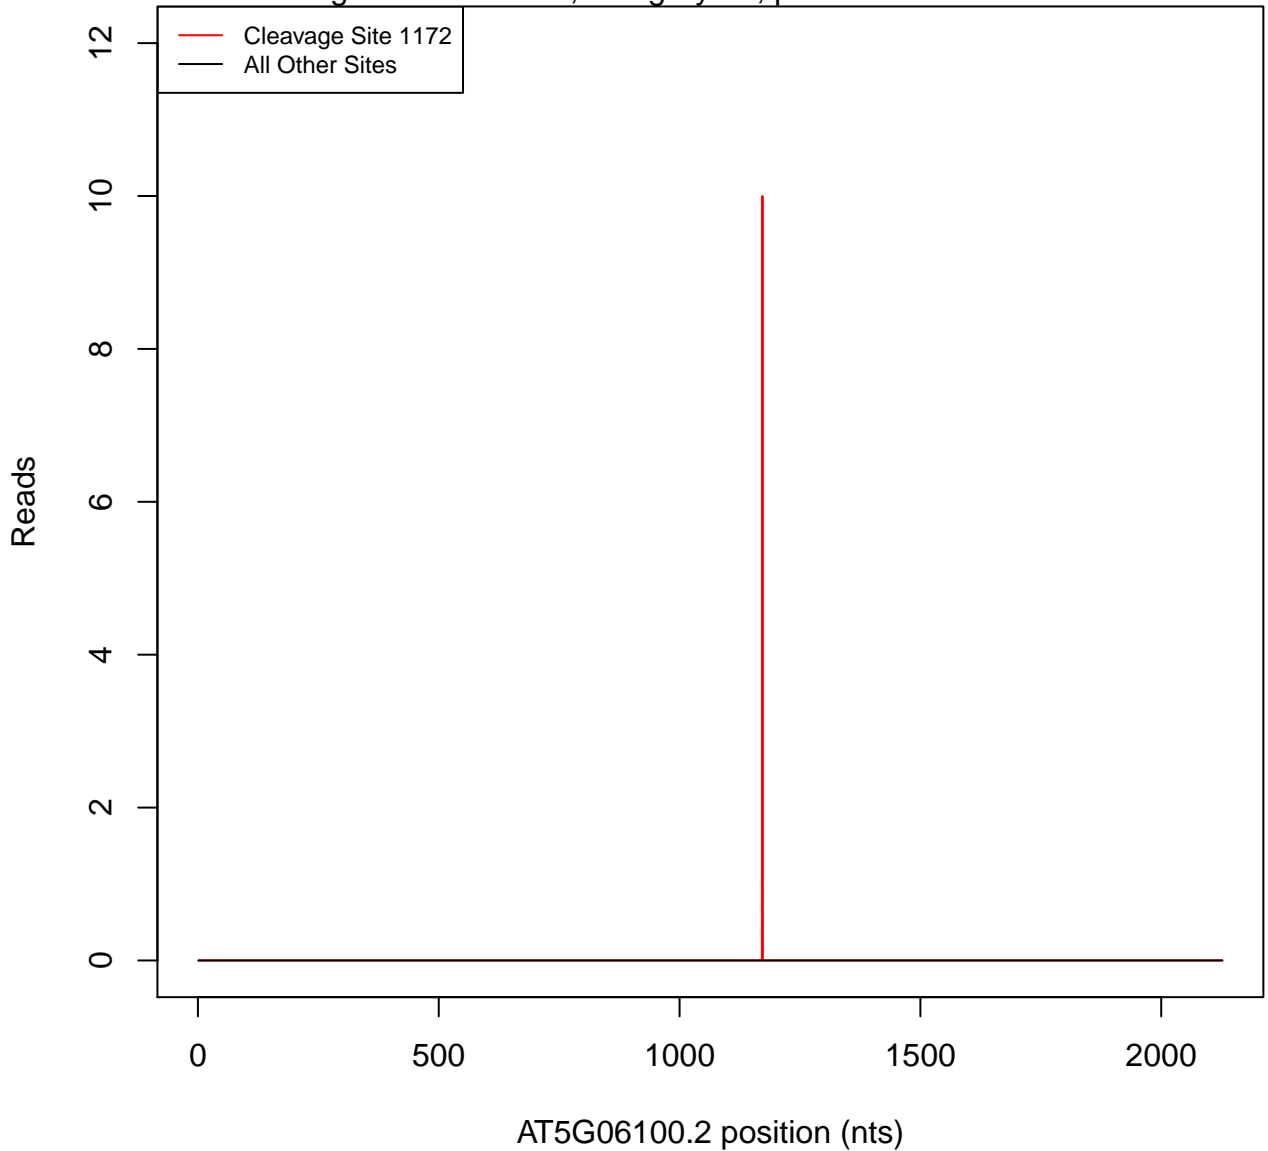

# ath-miR159c\_R-2 slicing AT5G06100.2 at nt 1172

alignment score=3 , category=1 , p=0.0377041117385082

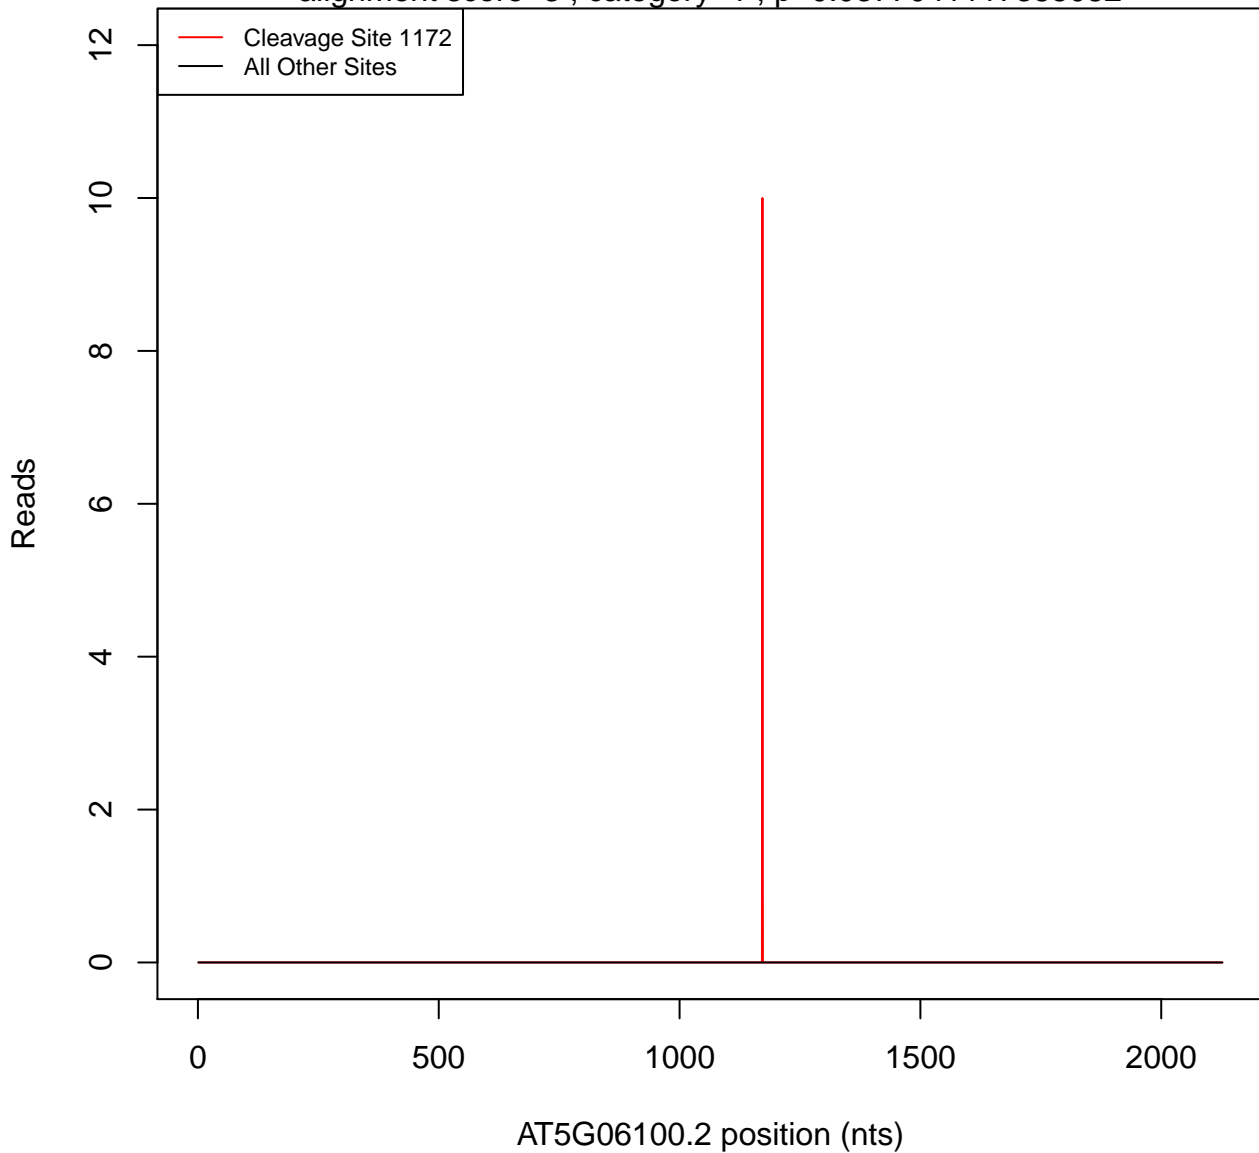

# ath-miR319c\_L+1R-1 slicing AT5G06100.2 at nt 1172

alignment score=4 , category=1 , p=0.0254859156190184

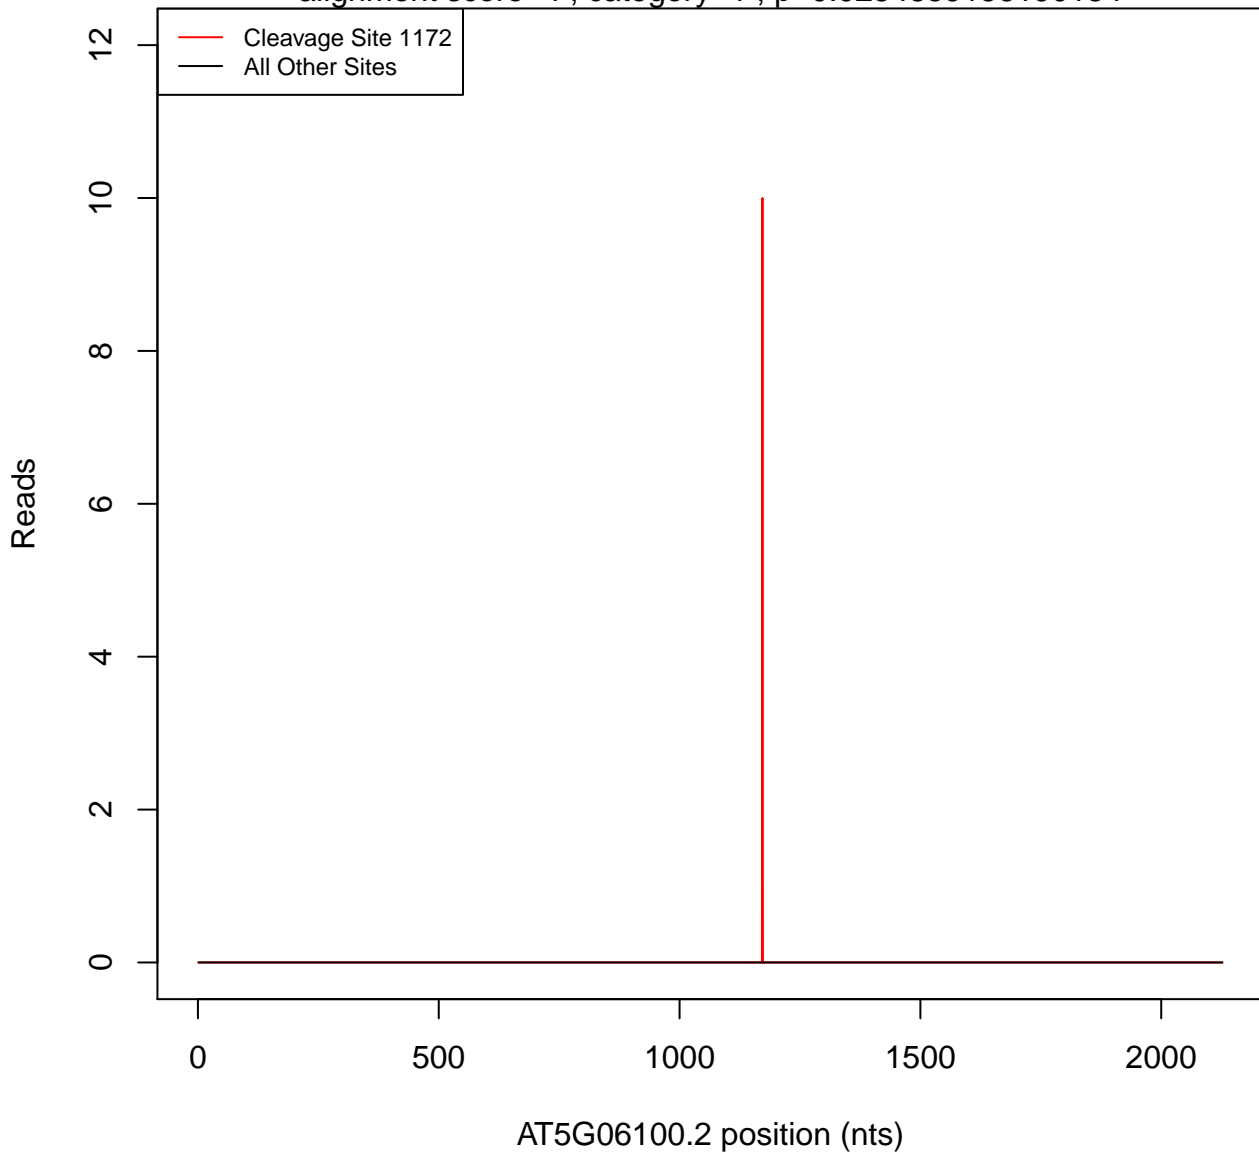

# ahy-miR159\_1ss7TC slicing AT5G06100.3 at nt 1260

alignment score=3.5 , category=1 , p=0.00773423857972566

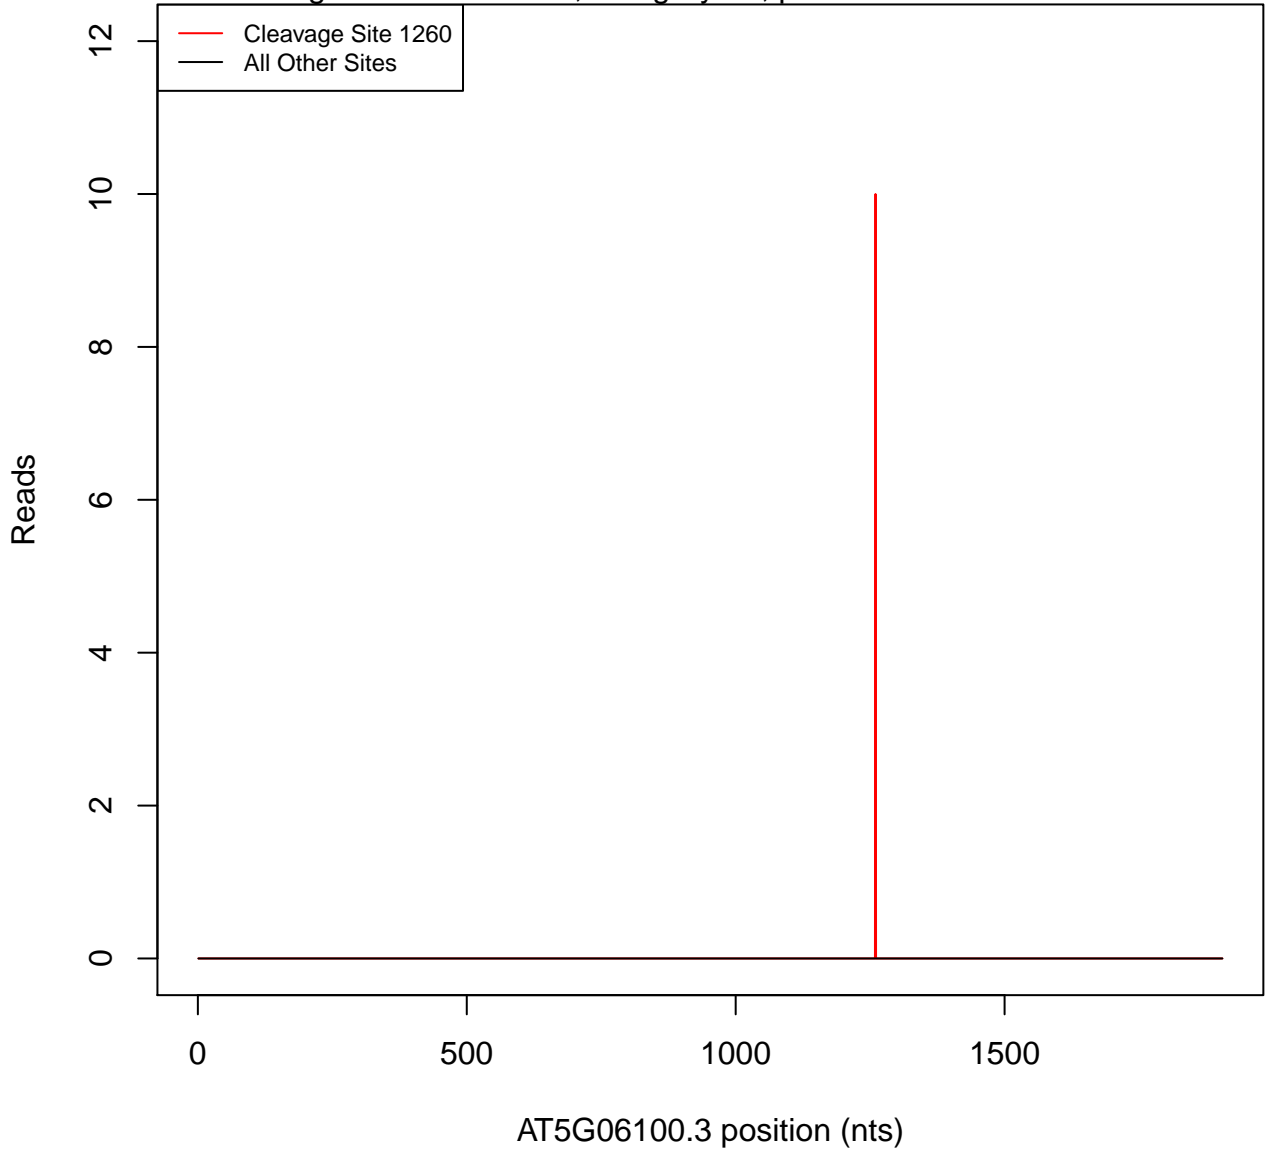

# ath-miR159a slicing AT5G06100.3 at nt 1260

alignment score=3.5 , category=1 , p=0.00927389322554639

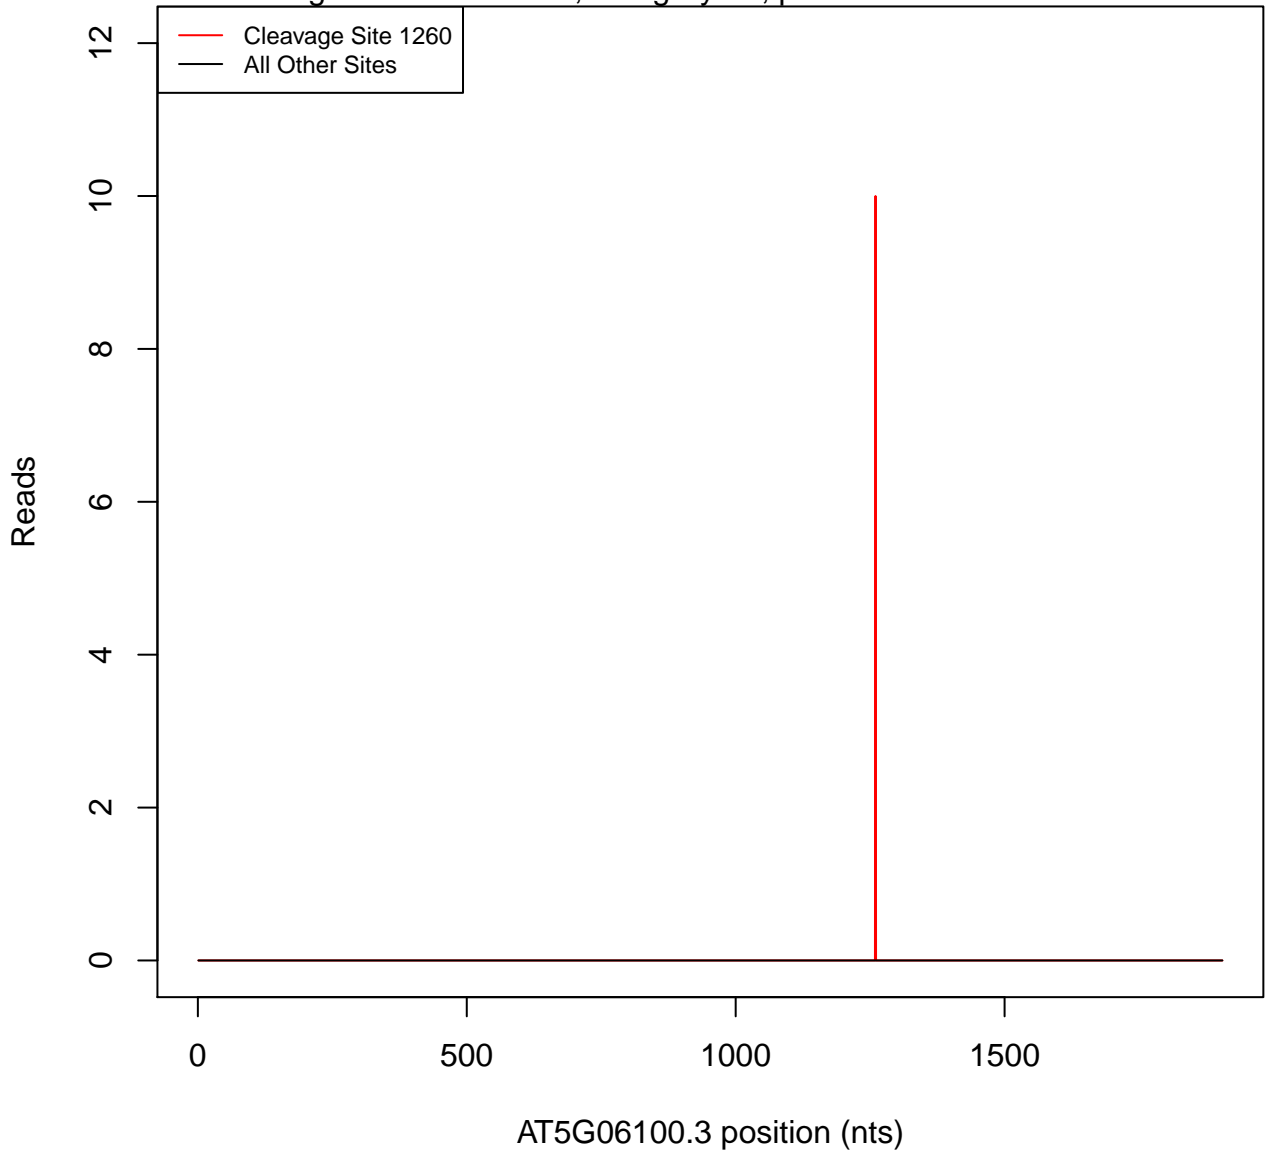

# ath-miR159b\_R-1 slicing AT5G06100.3 at nt 1260

alignment score=3.5 , category=1 , p=0.0169364053025027

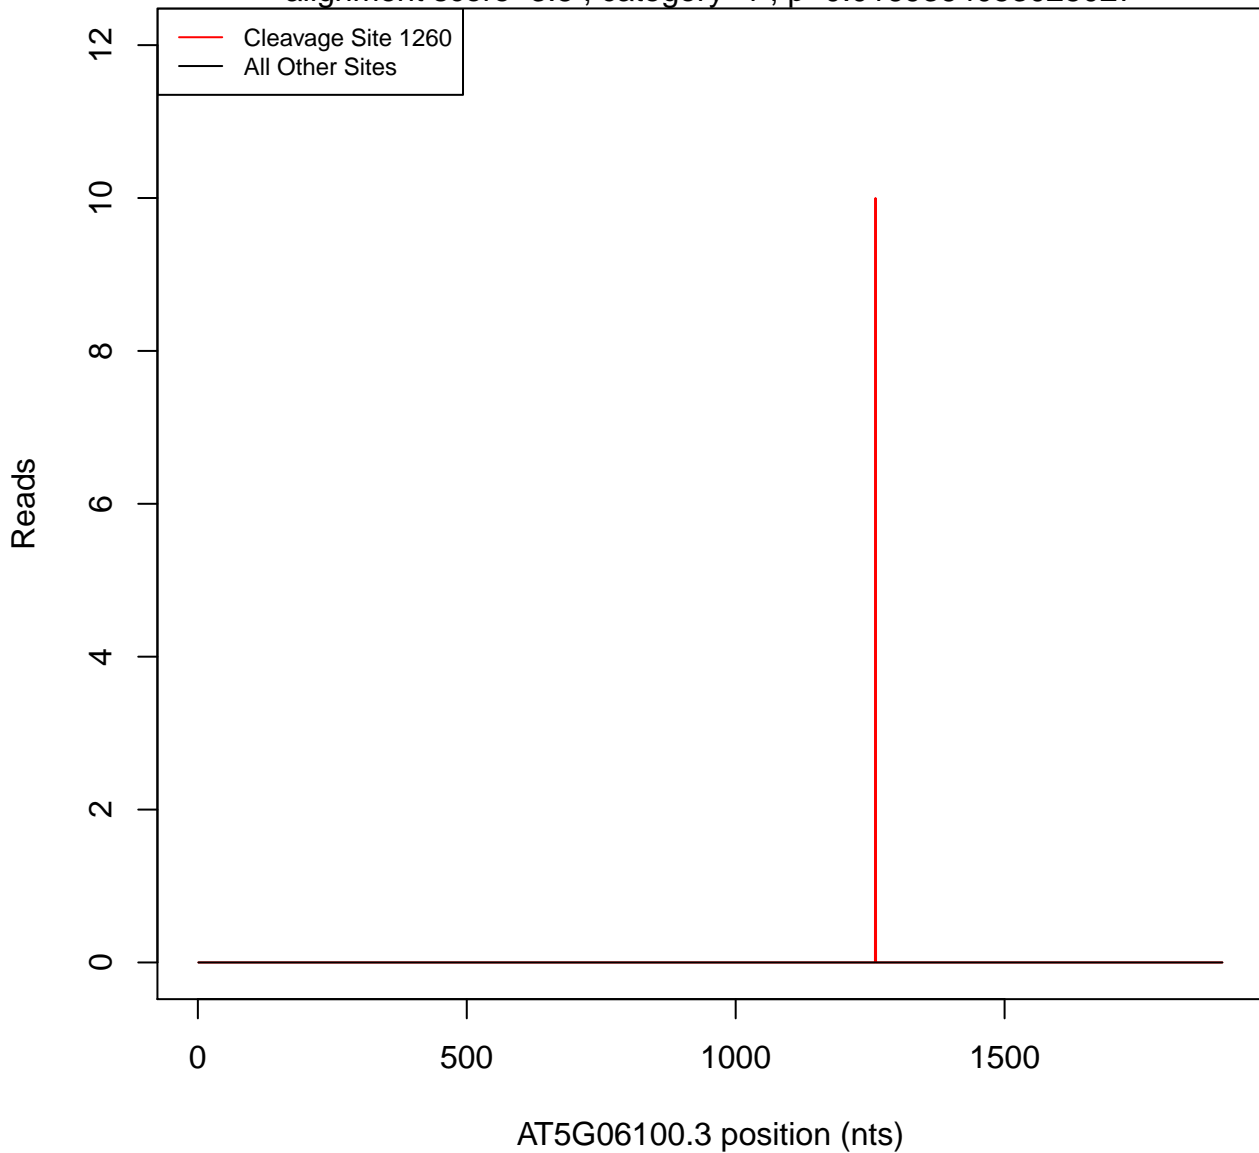



# ath-miR159c slicing AT5G06100.3 at nt 1260

alignment score=4 , category=1 , p=0.0228340661497719

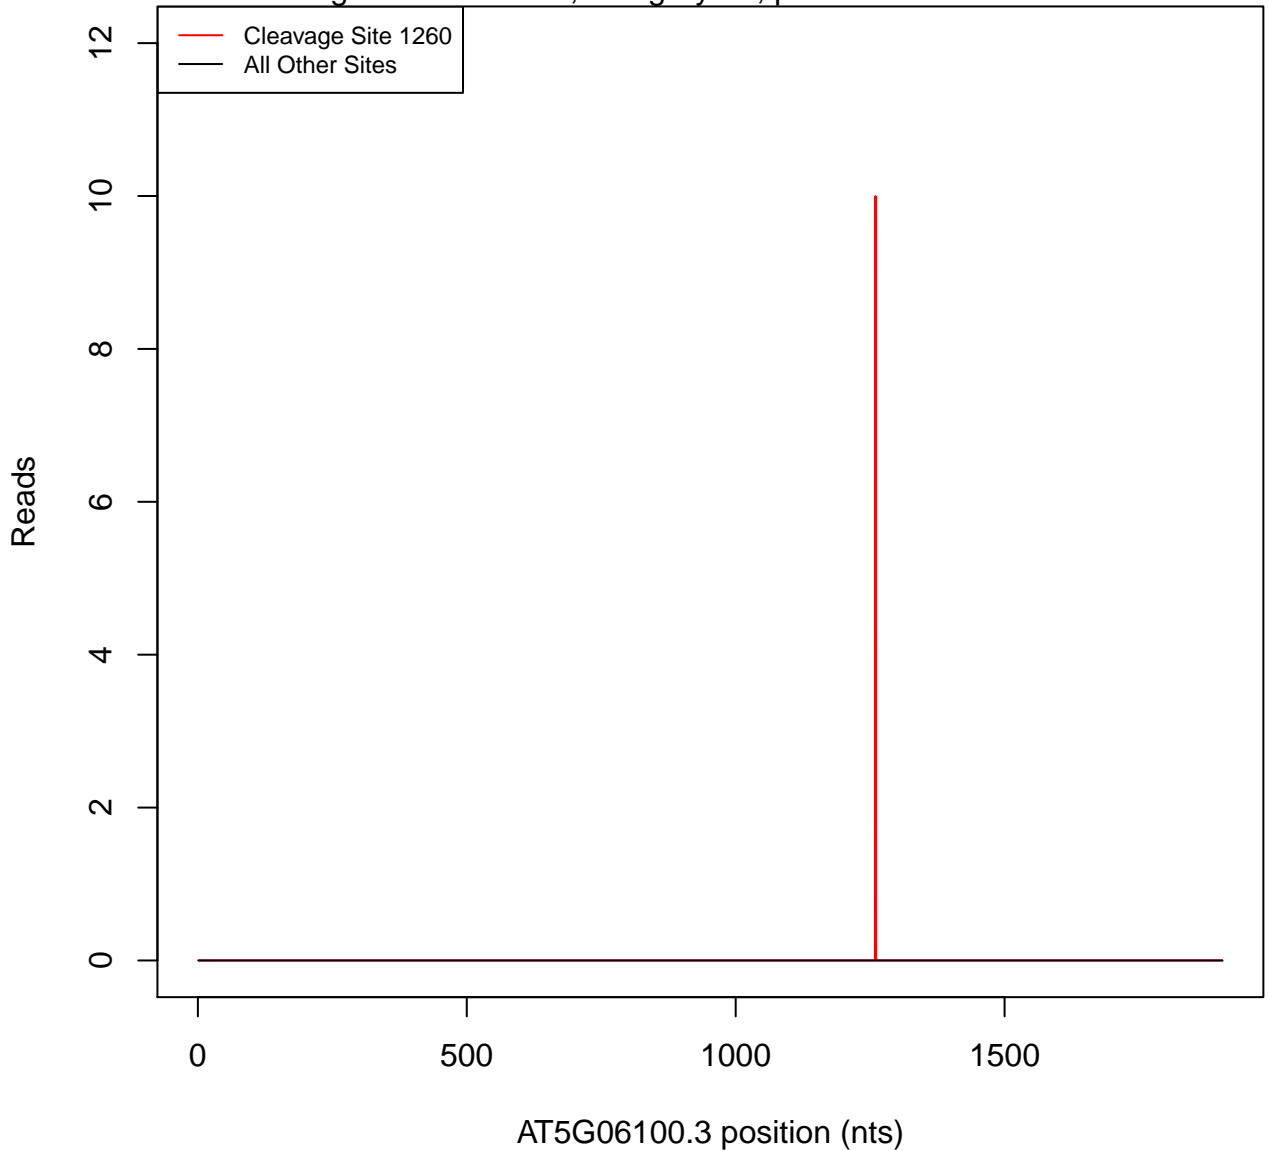

# ath-miR159c\_R-2 slicing AT5G06100.3 at nt 1260

alignment score=3 , category=1 , p=0.0377041117385082

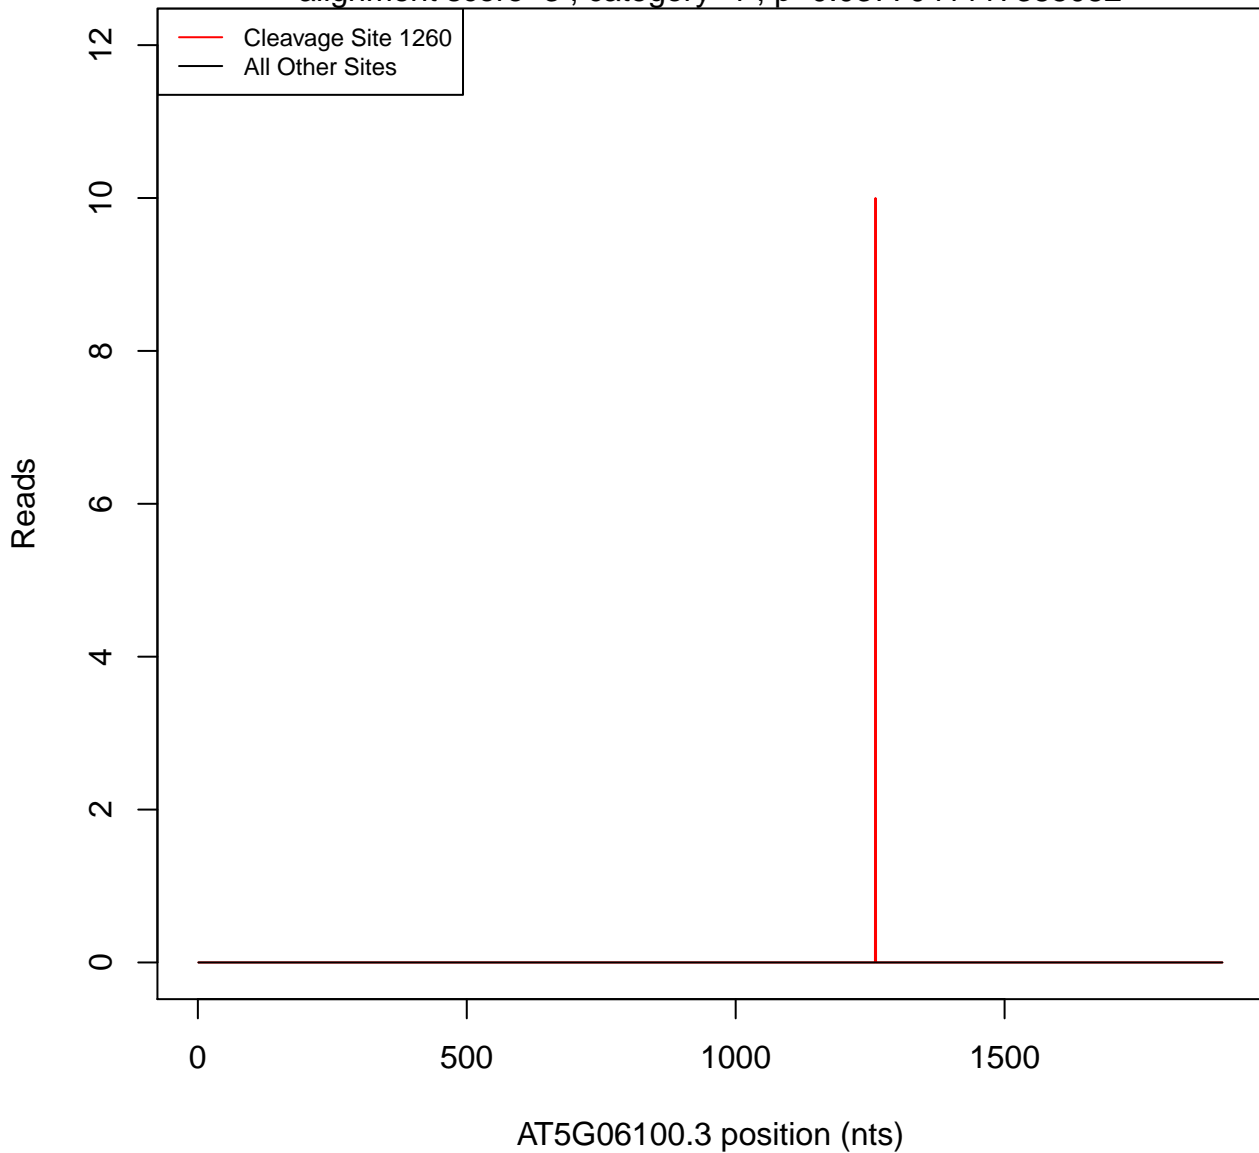

# ath-miR319c\_L+1R-1 slicing AT5G06100.3 at nt 1260

alignment score=4 , category=1 , p=0.0254859156190184

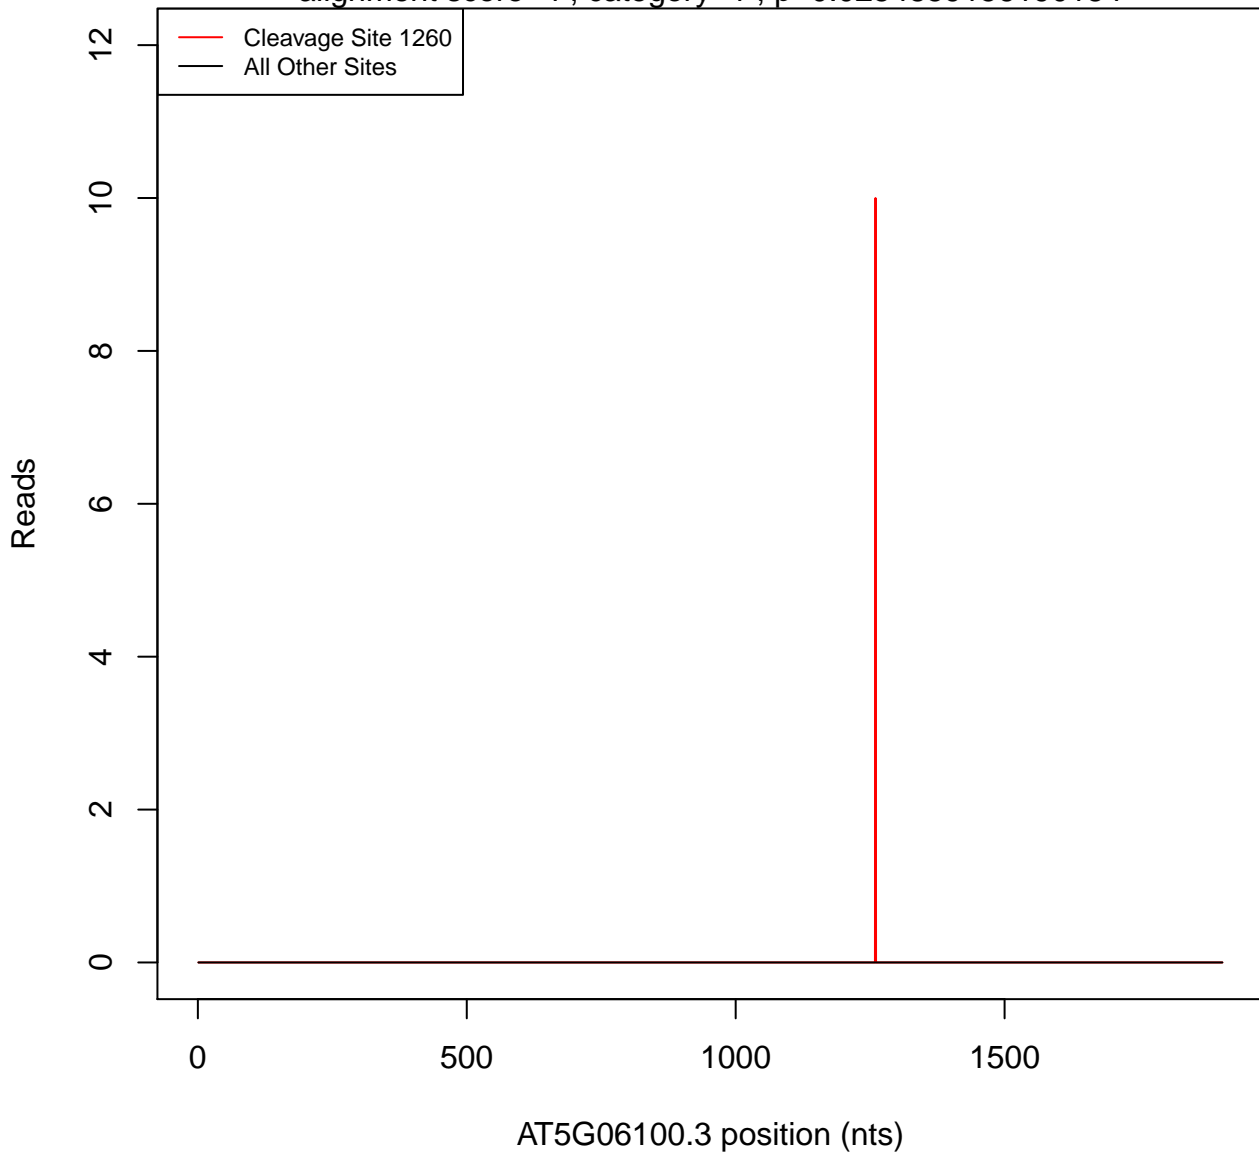

# ath-miR2934-3p slicing AT5G15650.1 at nt 479

alignment score=4 , category=3 , p=0.0231179230110562

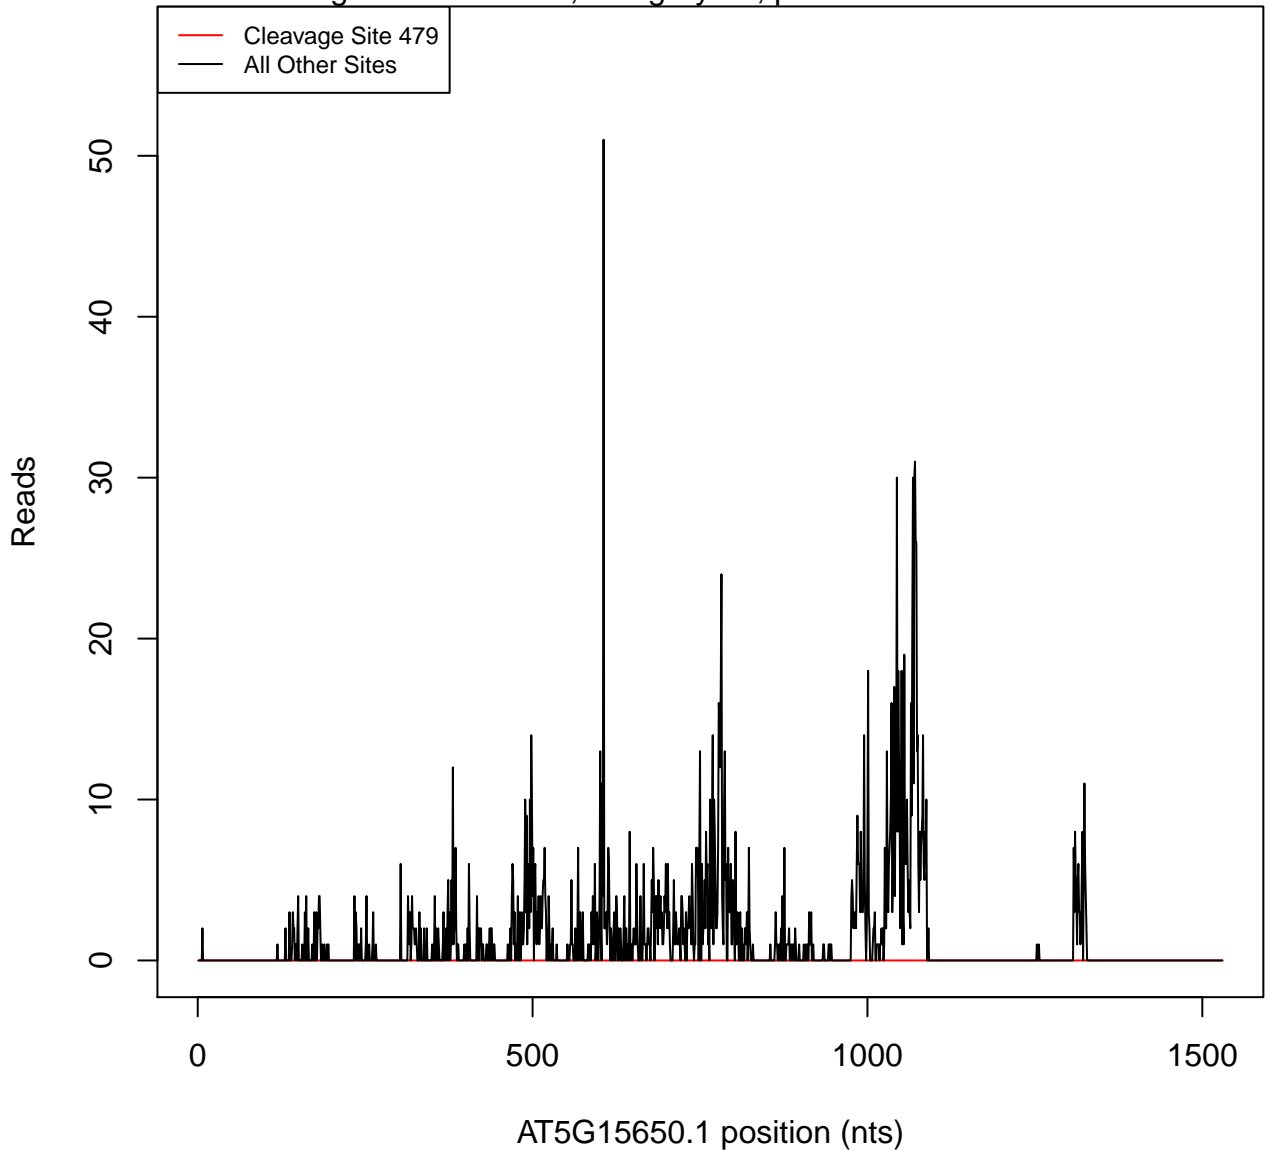

# ath-miR167c slicing AT5G37020.1 at nt 2380

alignment score=4 , category=2 , p=0.0490846628815822

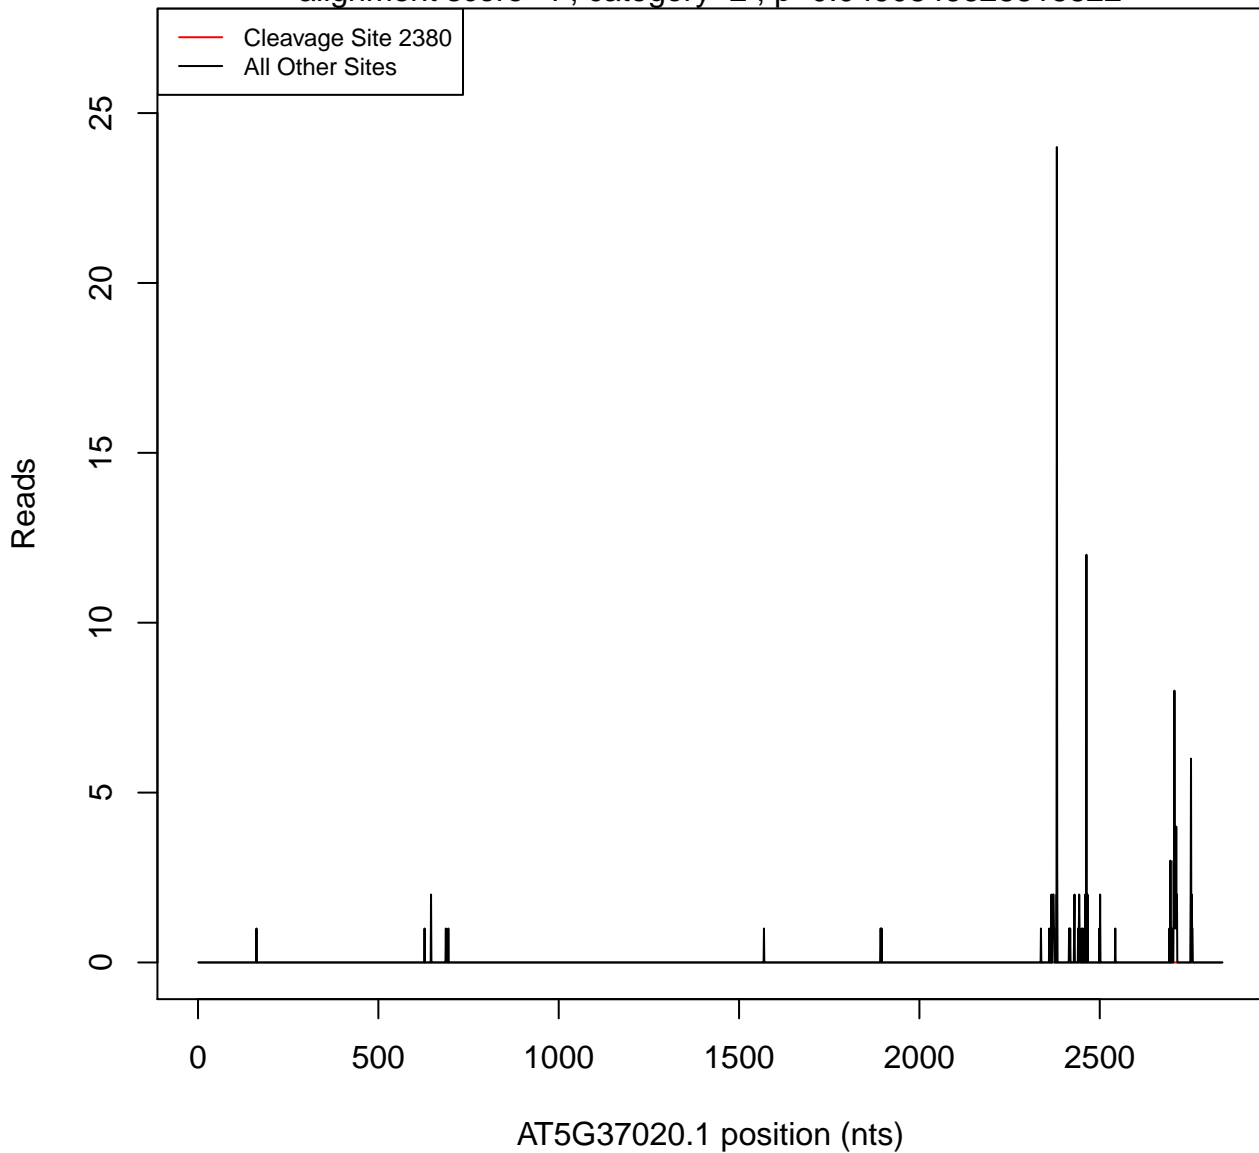

# ath-miR167a slicing AT5G37020.1 at nt 2381

alignment score=4 , category=0 , p=0.0117700365439392

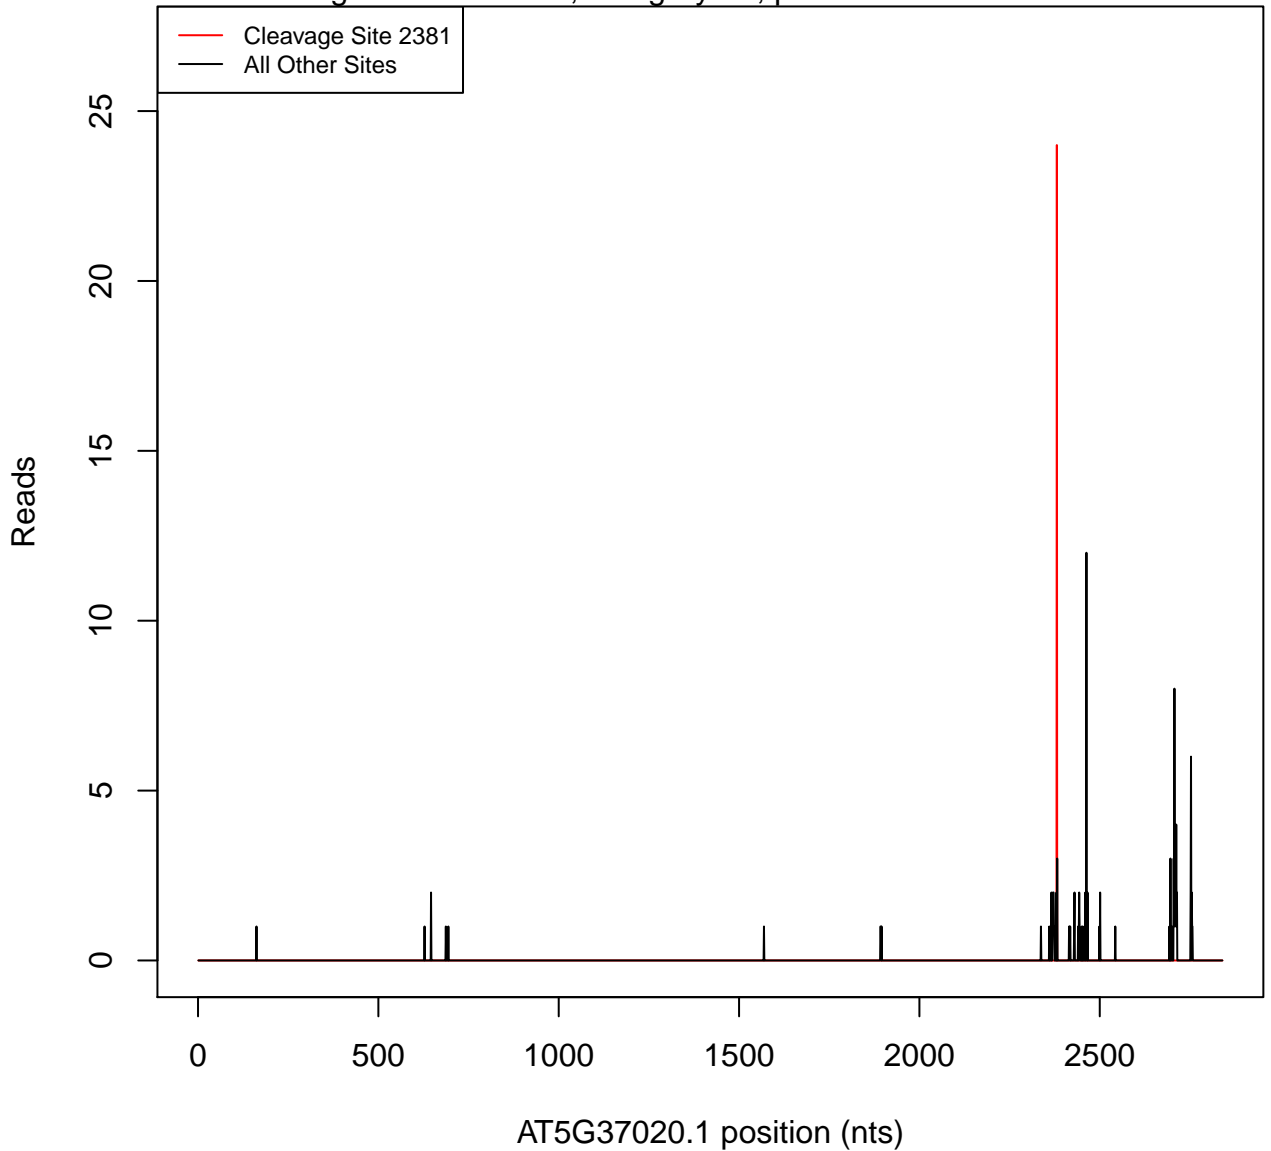

# ath-miR167b slicing AT5G37020.1 at nt 2381

alignment score=4 , category=0 , p=0.0117700365439392

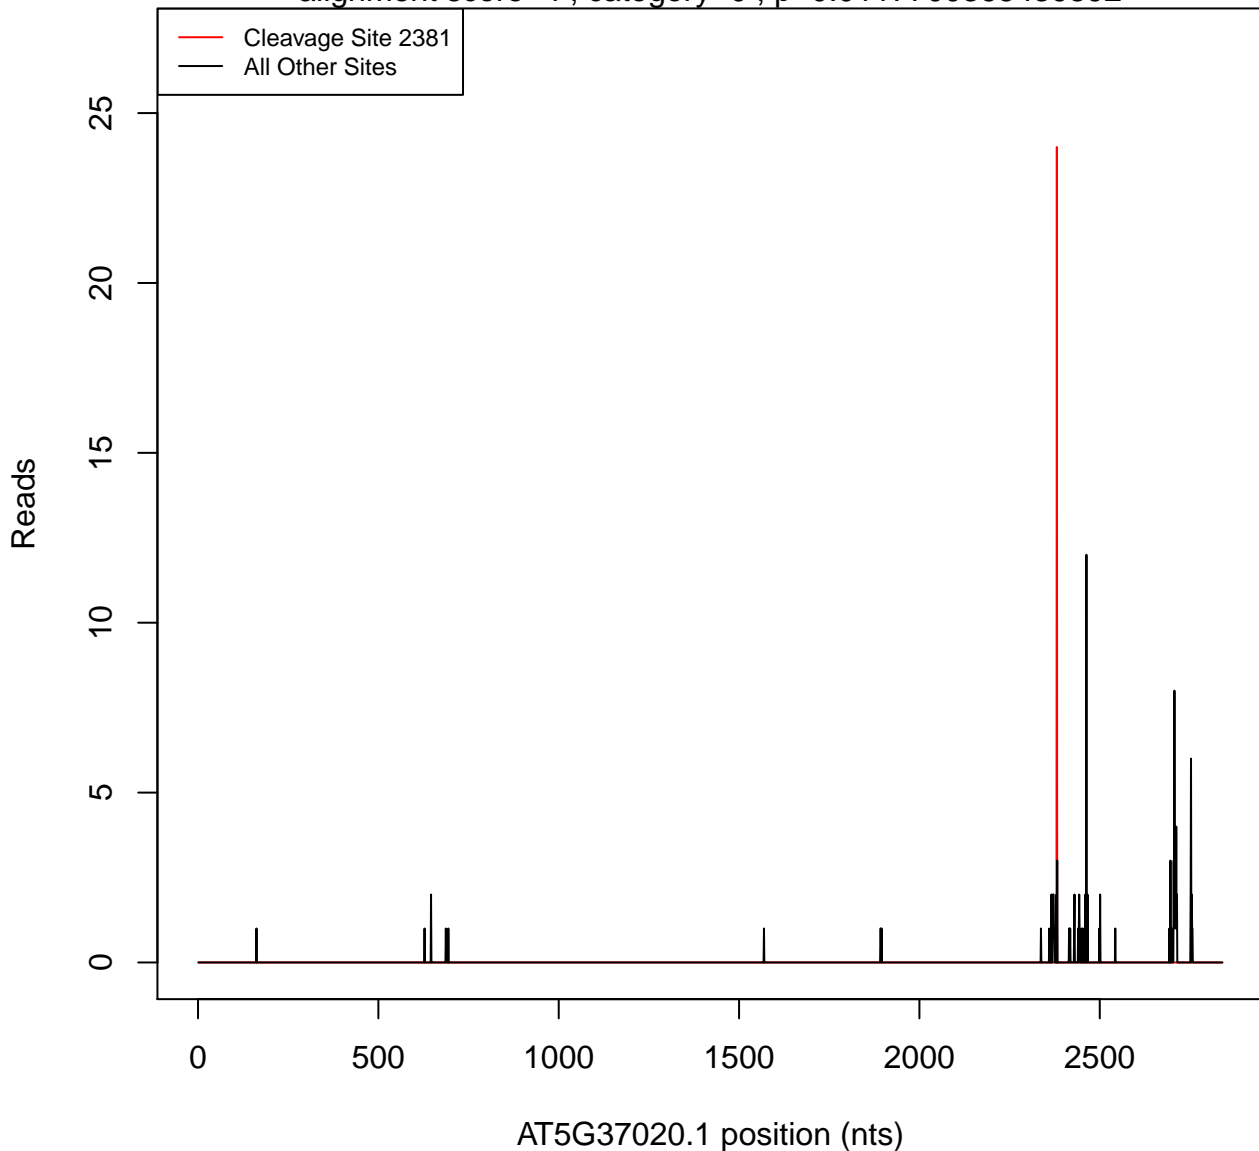

# ath-miR167d\_R-2 slicing AT5G37020.1 at nt 2381

alignment score=4 , category=0 , p=0.0132315168322058

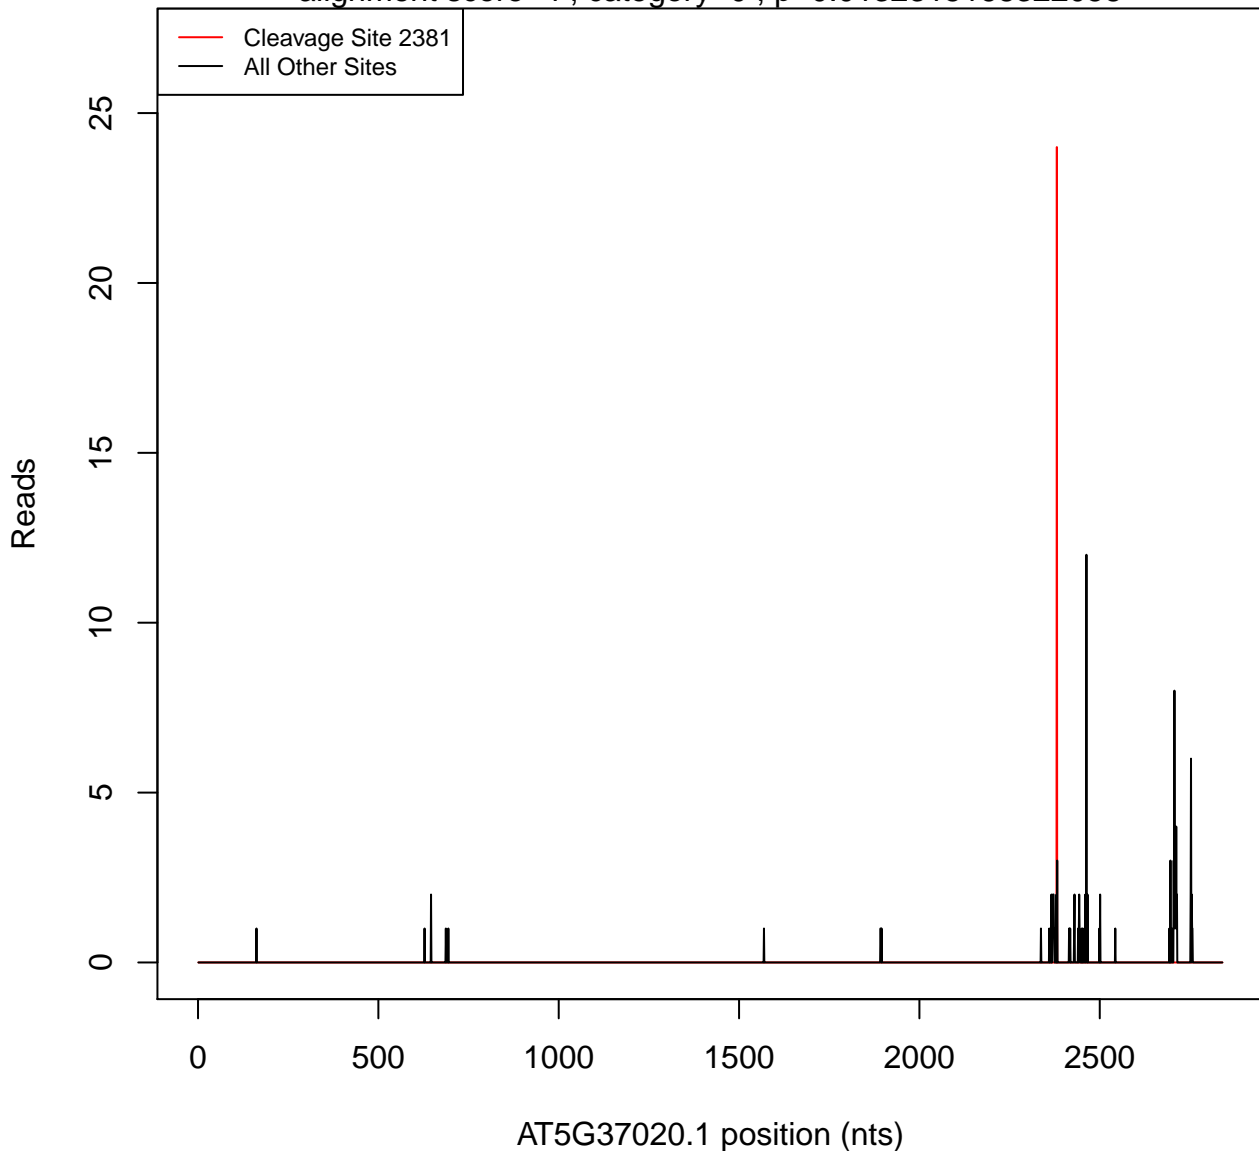



# ath-miR167c slicing AT5G37020.2 at nt 2380

alignment score=4 , category=2 , p=0.0490846628815822

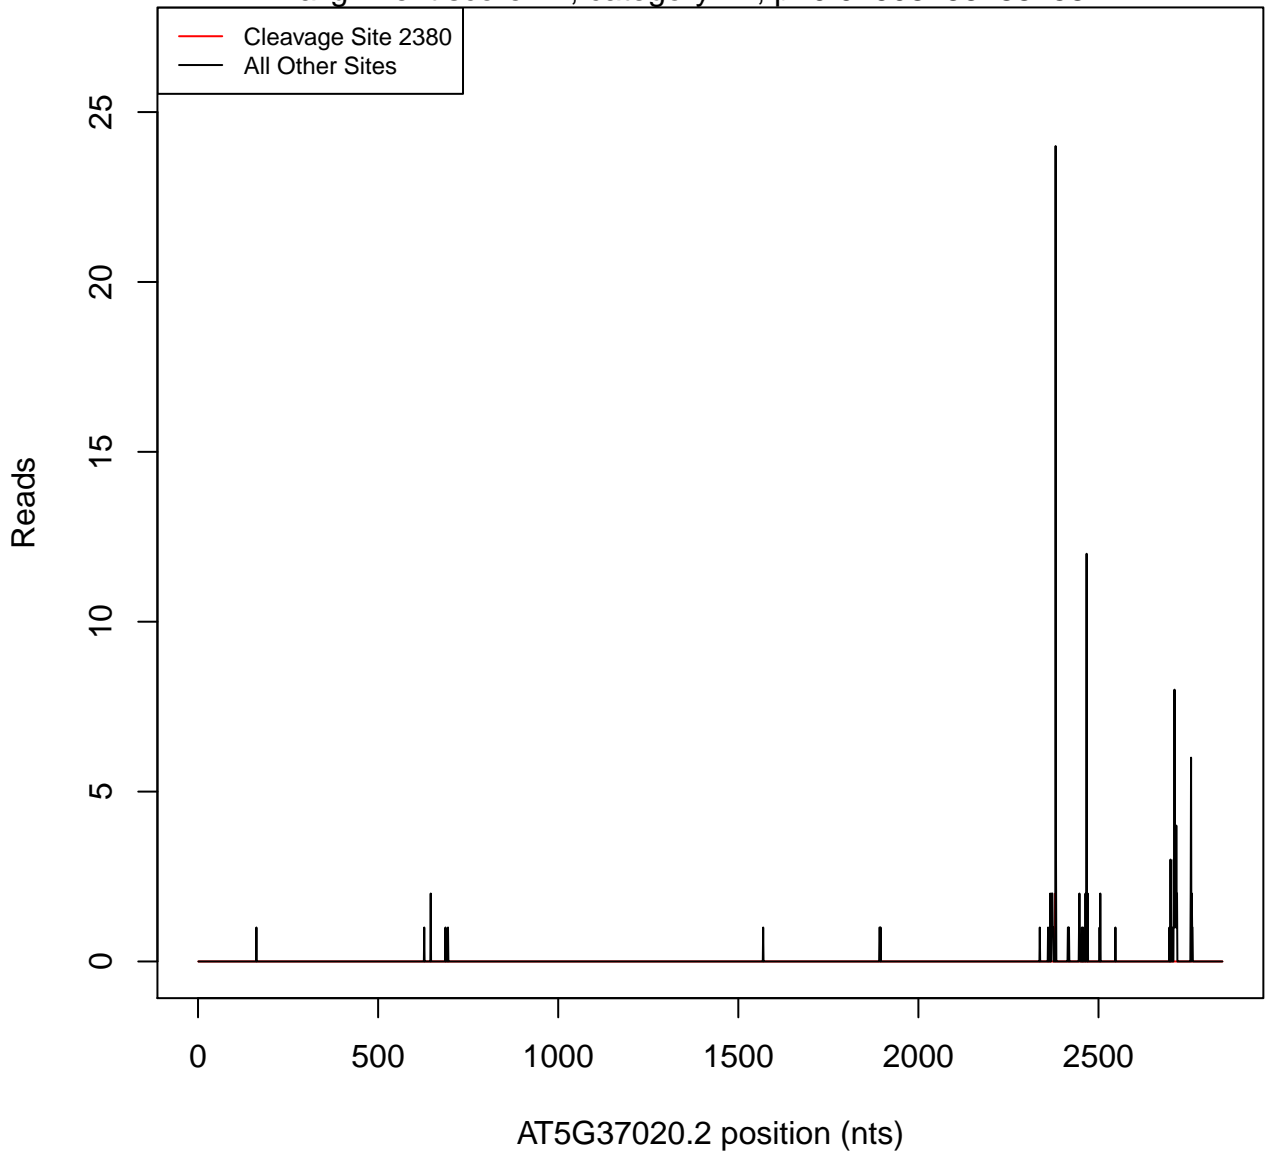

# ath-miR167a slicing AT5G37020.2 at nt 2381

alignment score=4 , category=0 , p=0.0117700365439392

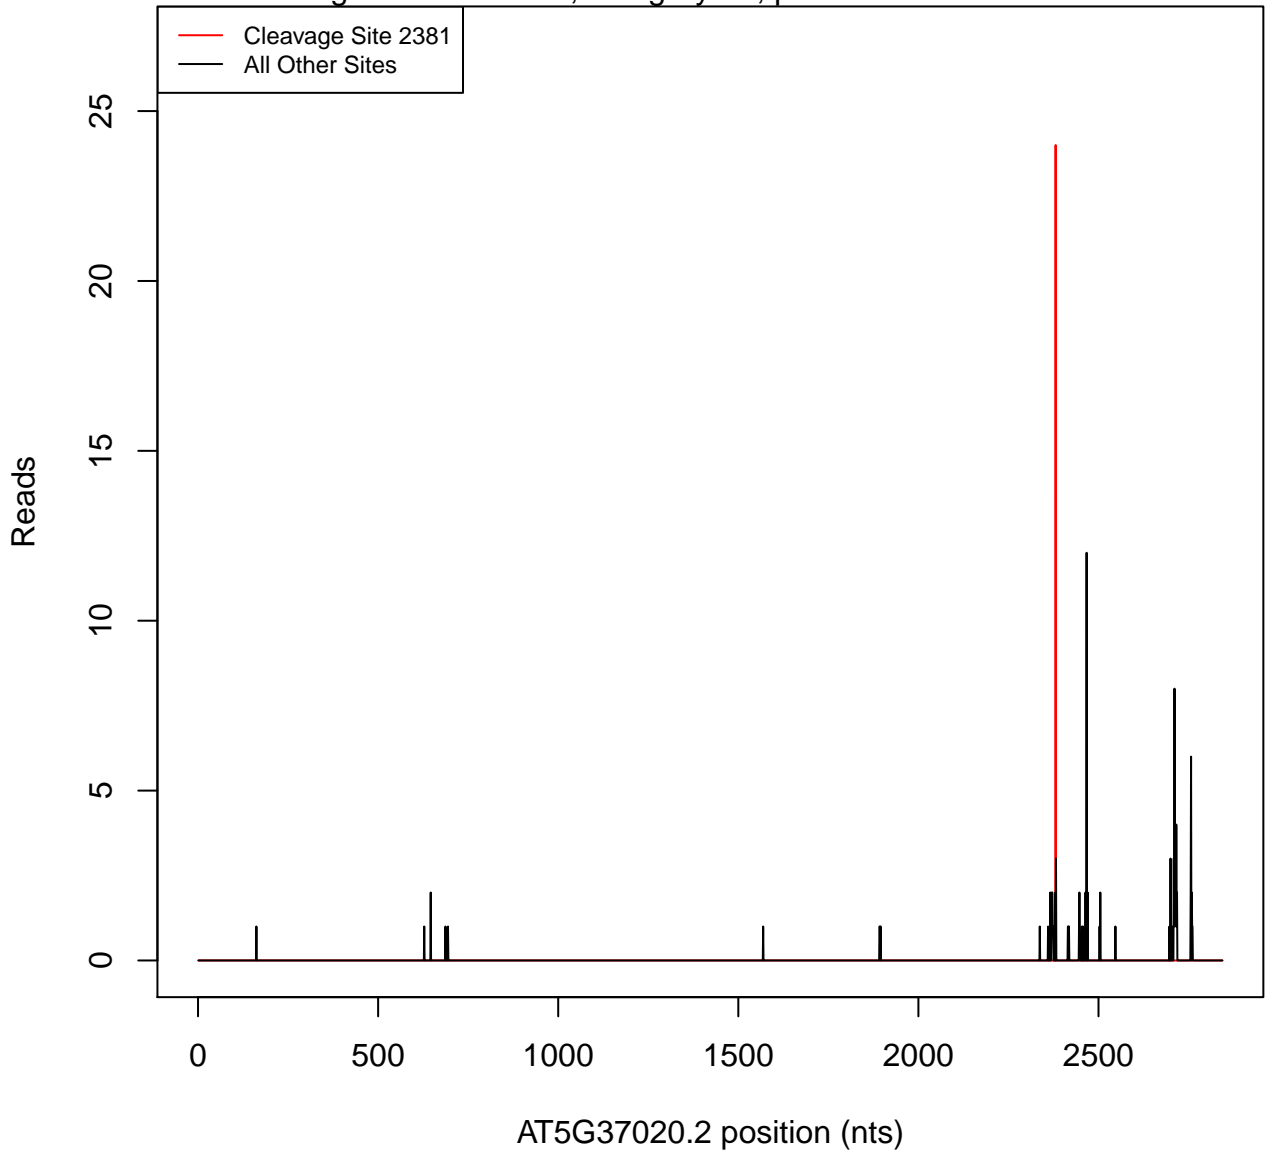

# ath-miR167b slicing AT5G37020.2 at nt 2381

alignment score=4 , category=0 , p=0.0117700365439392

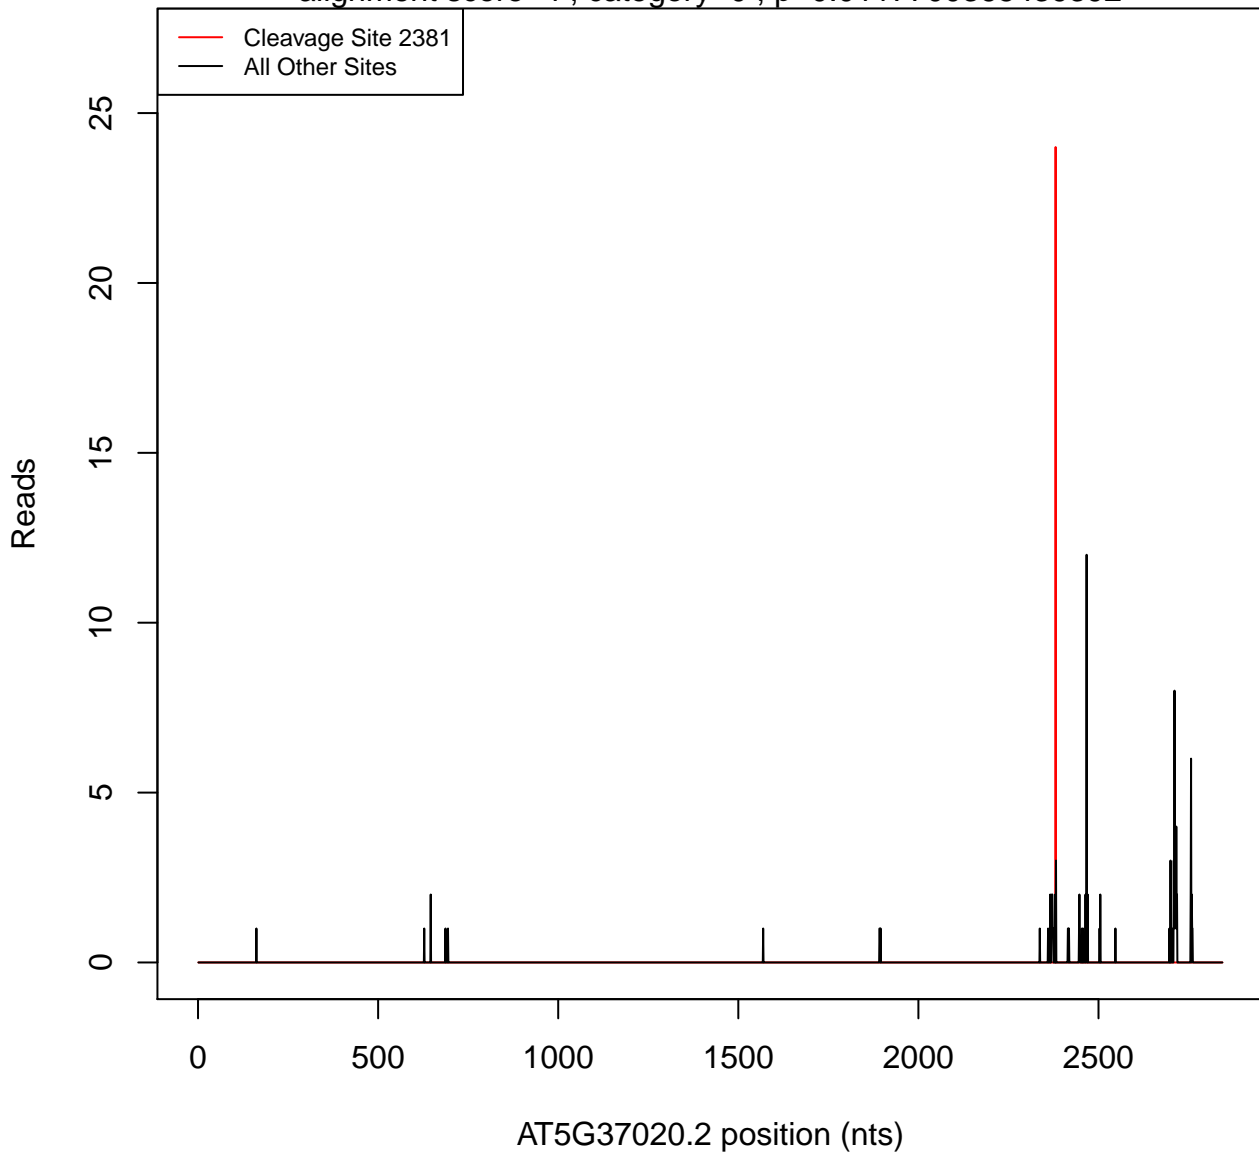

# ath-miR167d\_R-2 slicing AT5G37020.2 at nt 2381

alignment score=4 , category=0 , p=0.0132315168322058

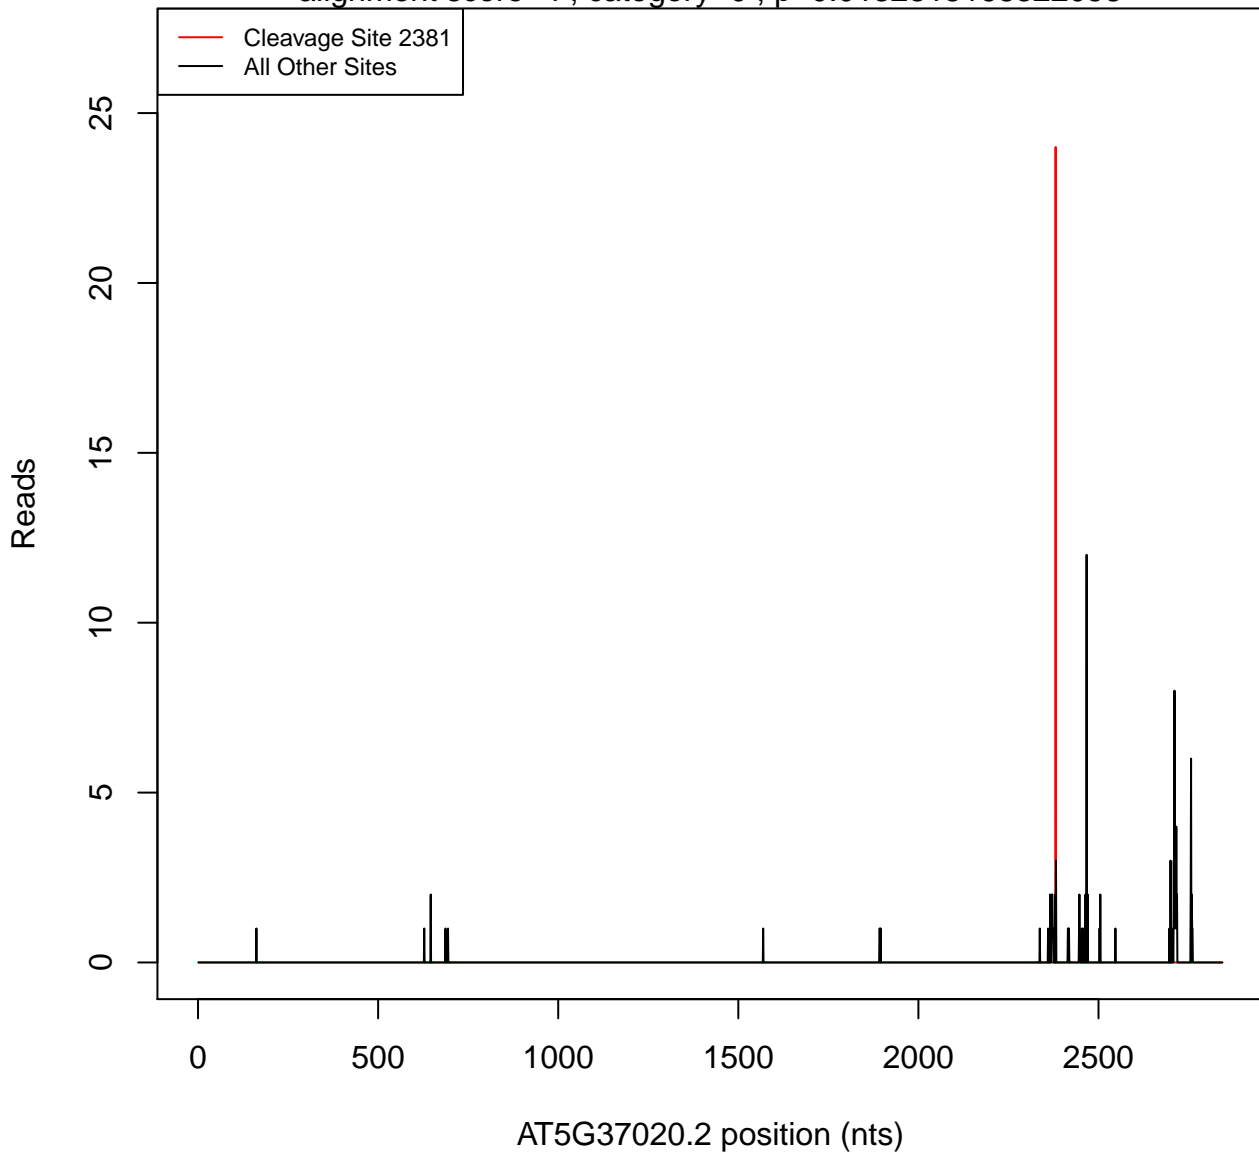

# ath-miR164c slicing AT5G39610.1 at nt 781

alignment score=3.5 , category=4 , p=0.0878397022113475

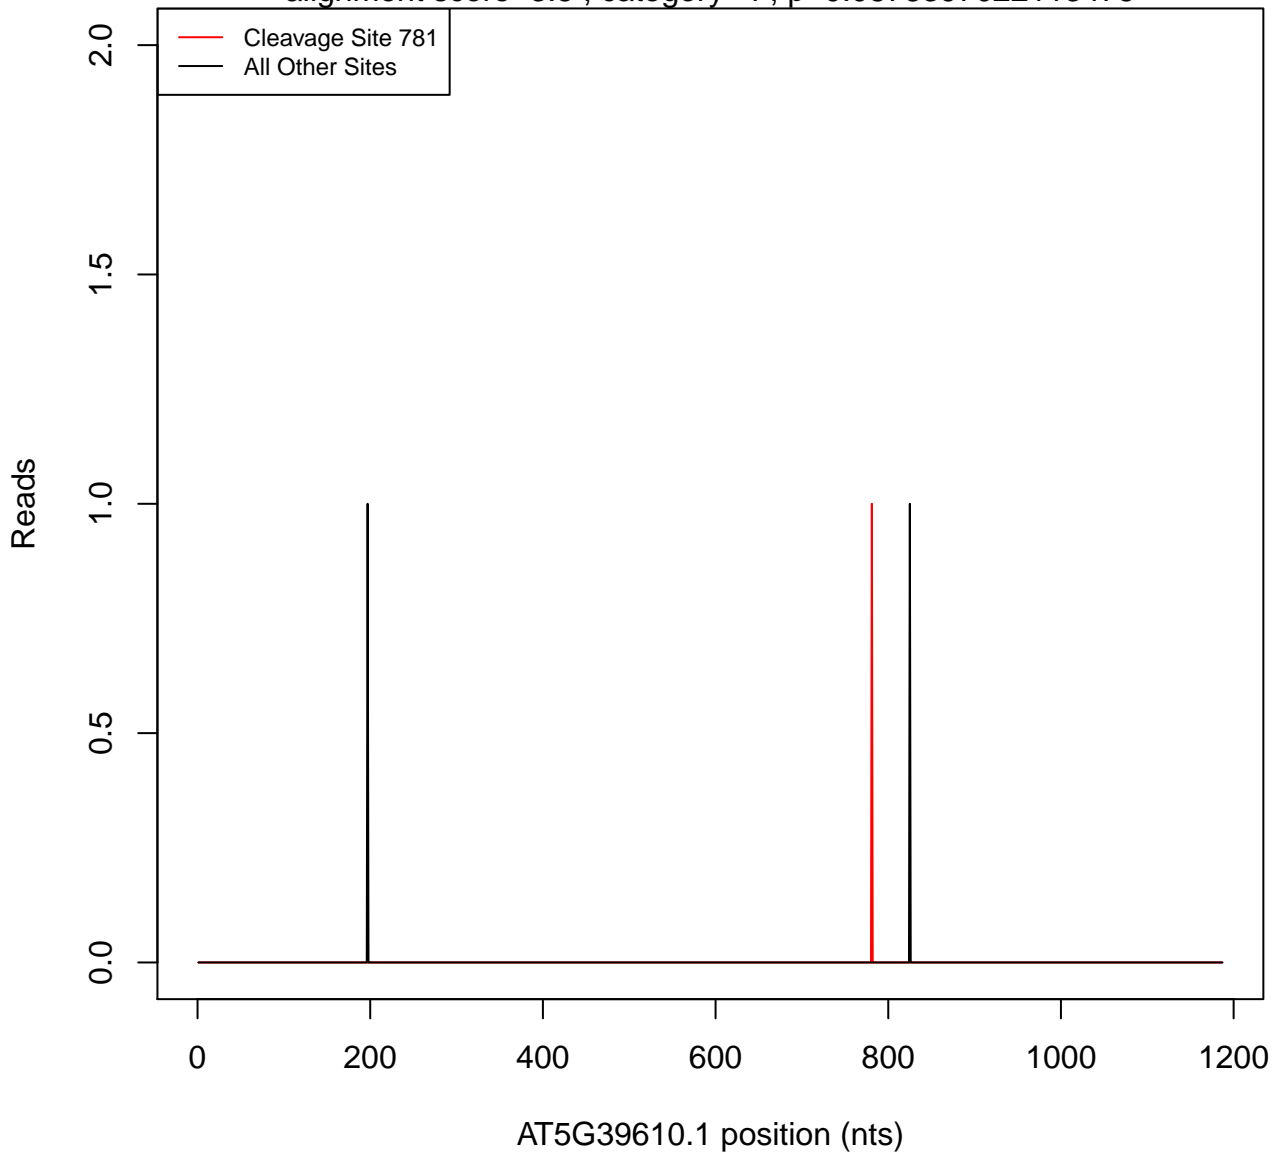

# ath-miR395b slicing AT5G43780.1 at nt 406

alignment score=2 , category=4 , p=0.0612522129308579

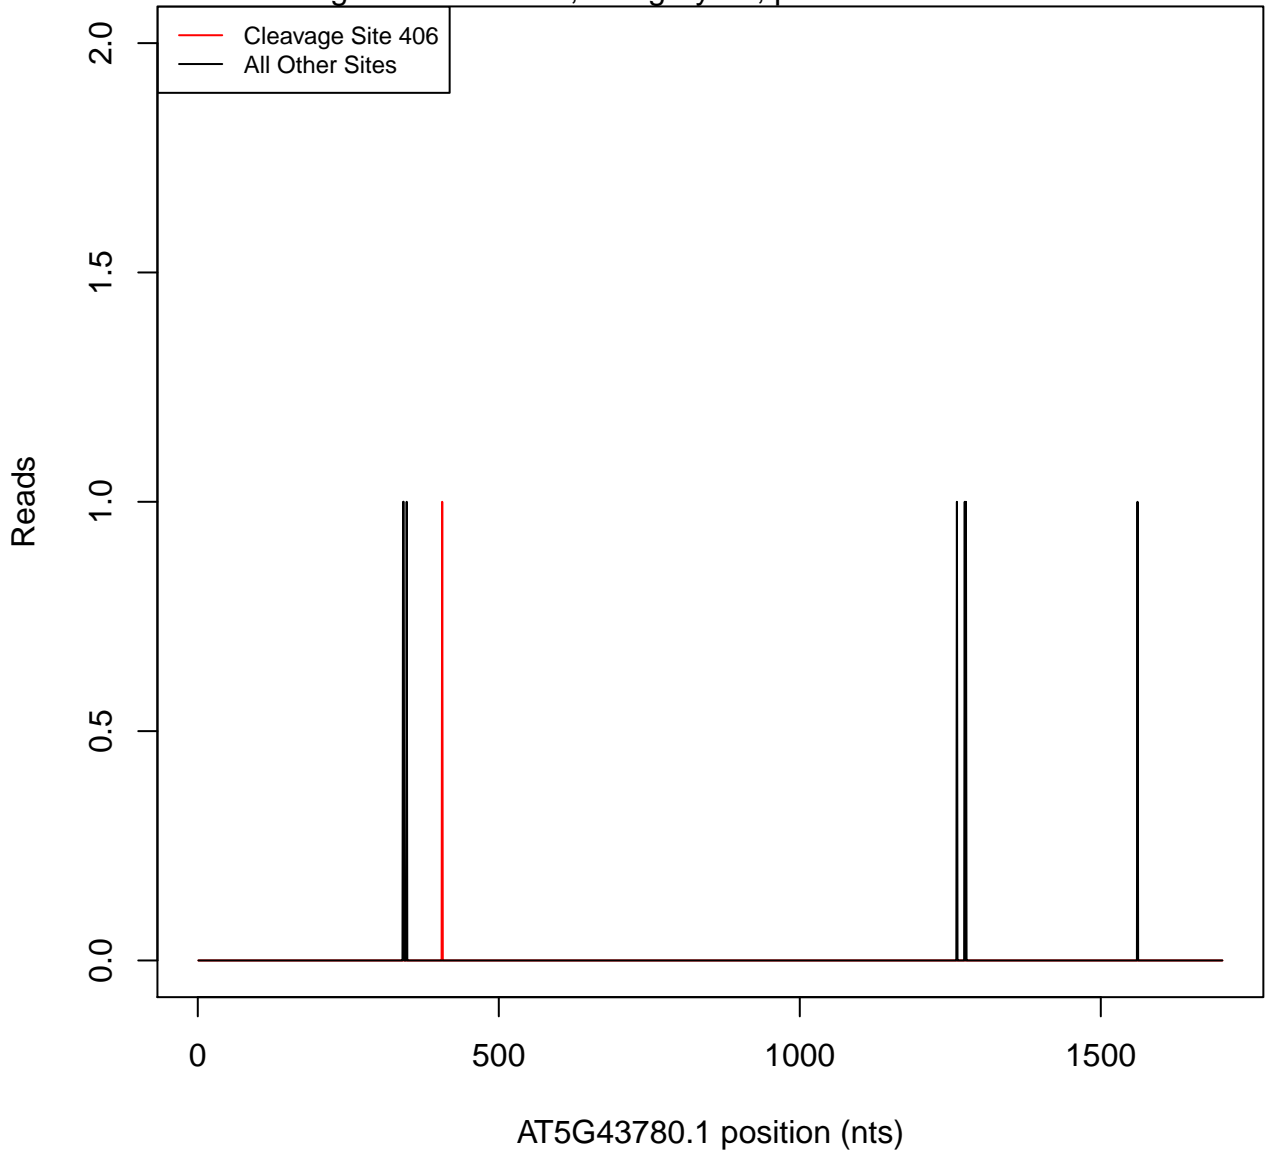

# ath-miR395f slicing AT5G43780.1 at nt 406

alignment score=2 , category=4 , p=0.0612522129308579

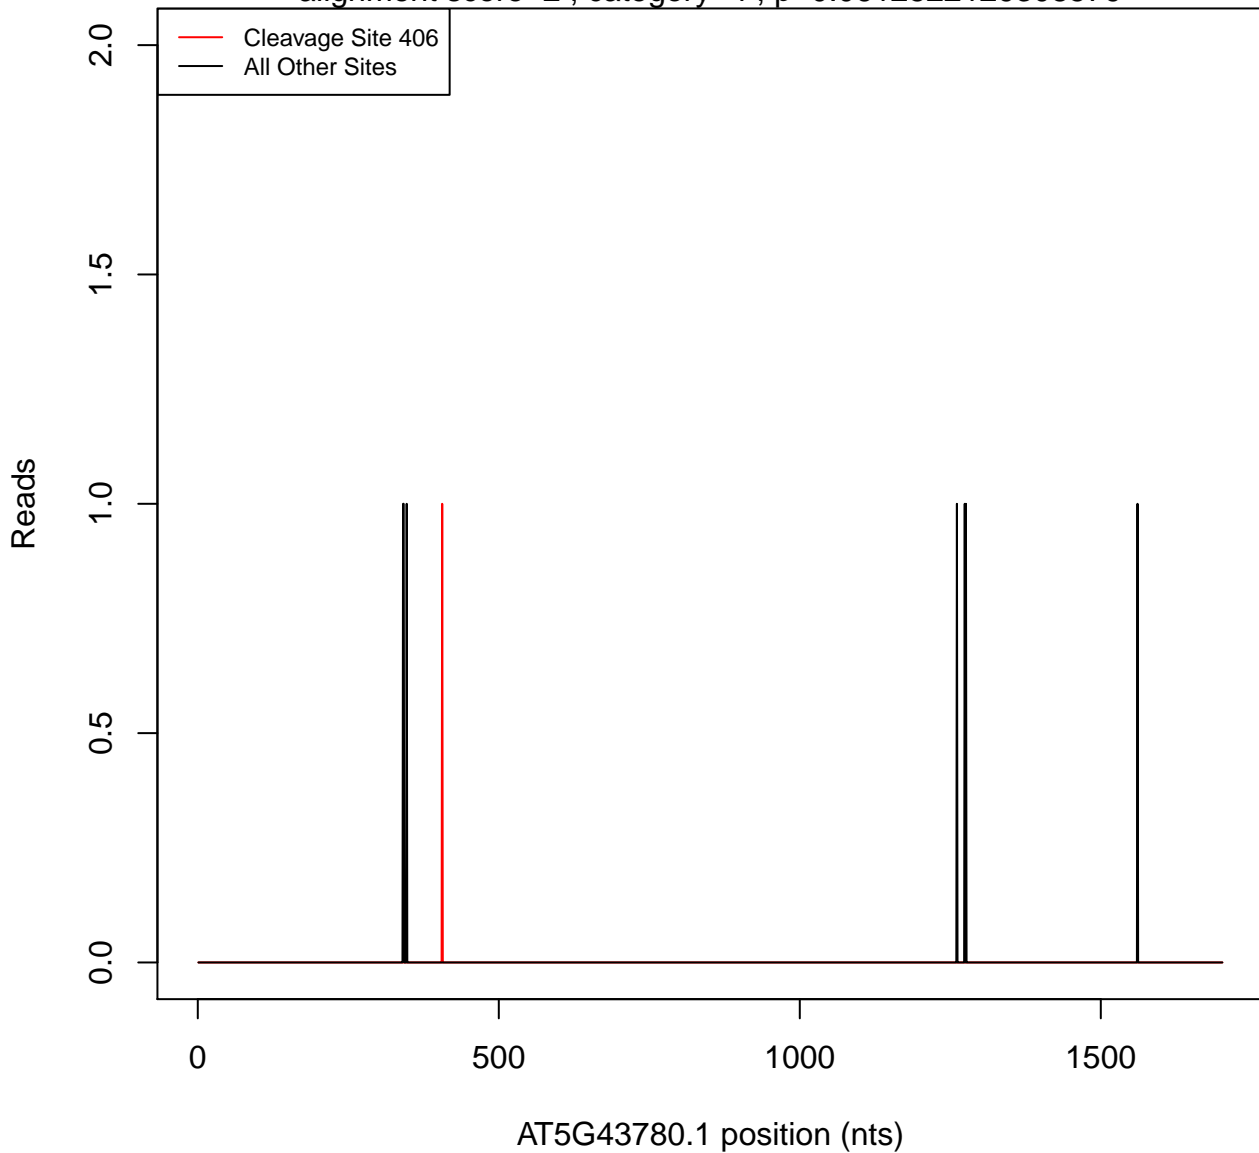

# ath-miR172a slicing AT5G59505.1 at nt 22

alignment score=4 , category=1 , p=0.0161728285549406

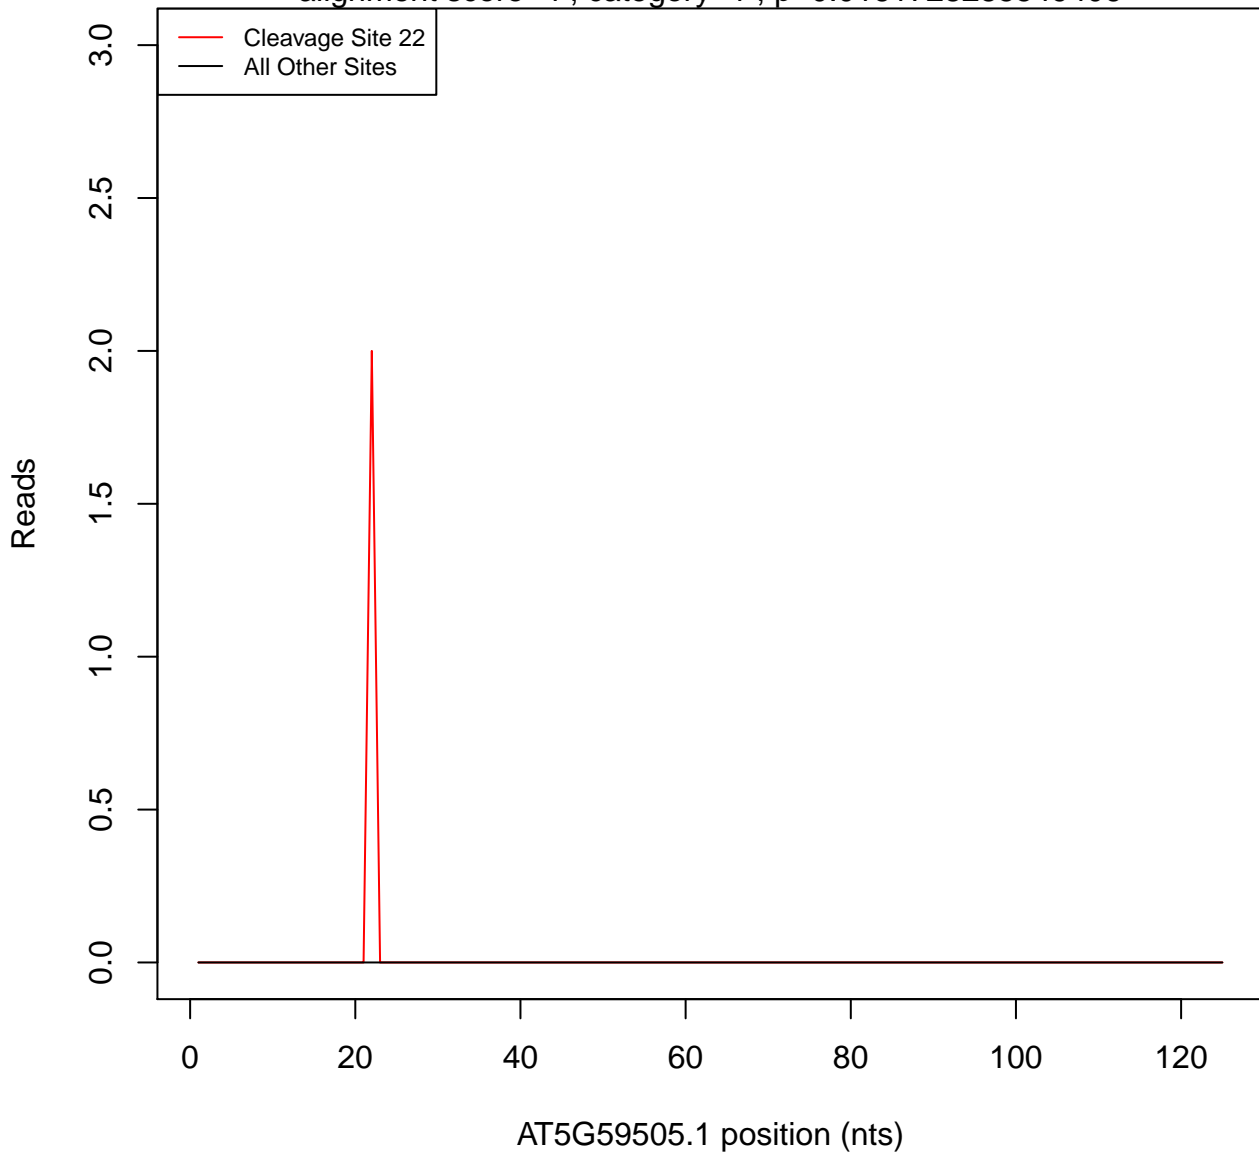



# ath-miR172b slicing AT5G59505.1 at nt 22

alignment score=4 , category=1 , p=0.0161728285549406

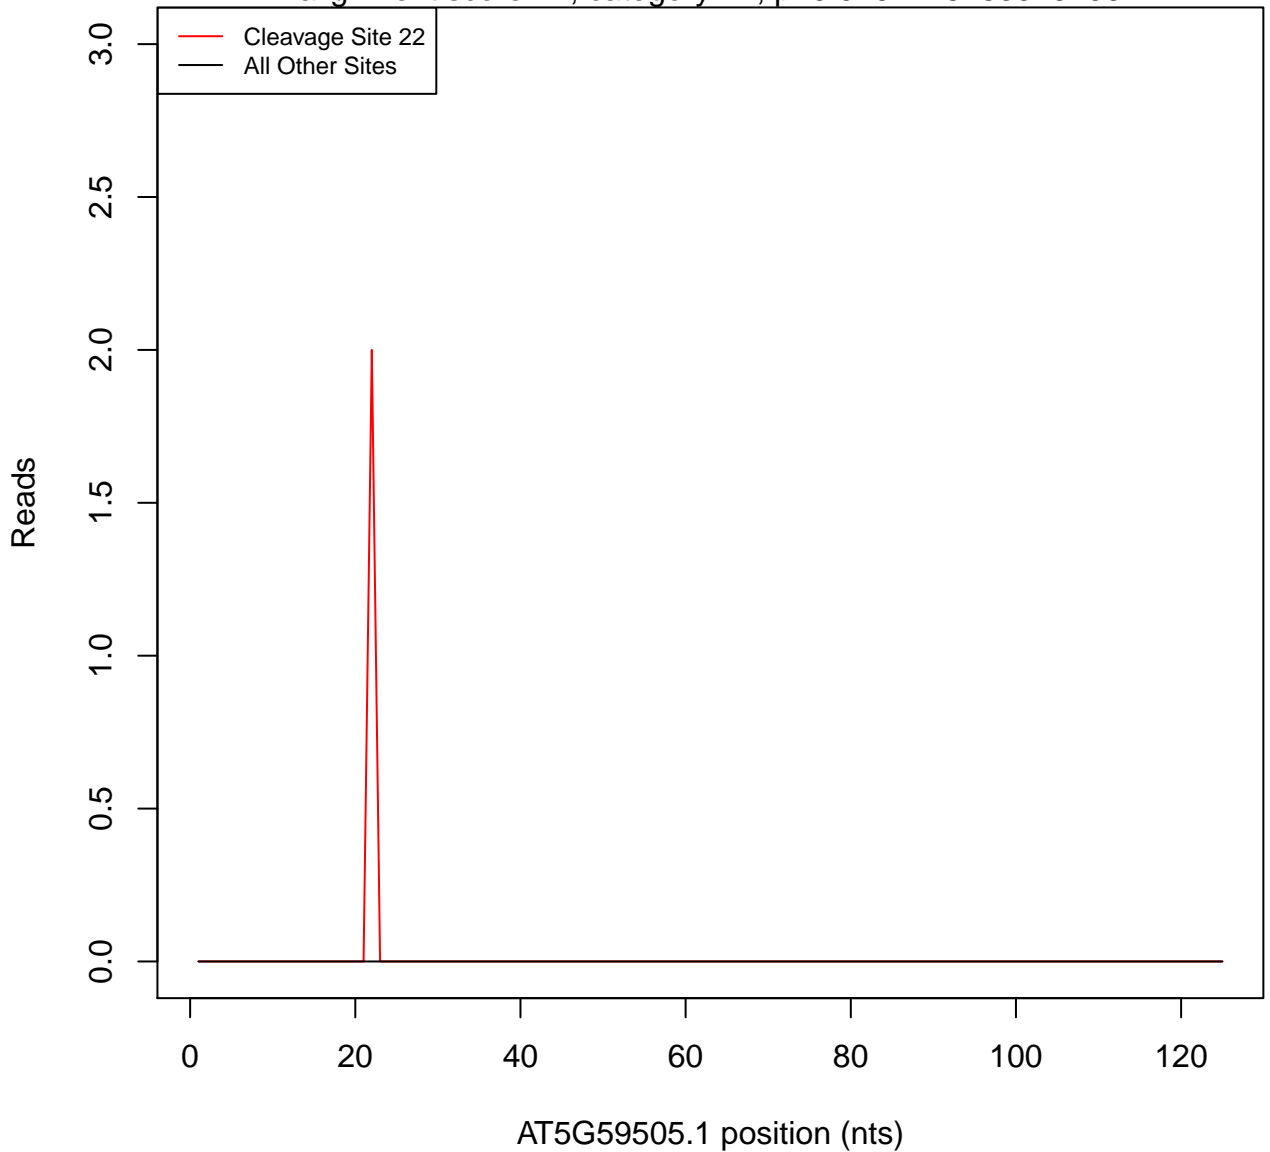

# ath-miR172e slicing AT5G59505.1 at nt 22

alignment score=4 , category=1 , p=0.0134956362965197

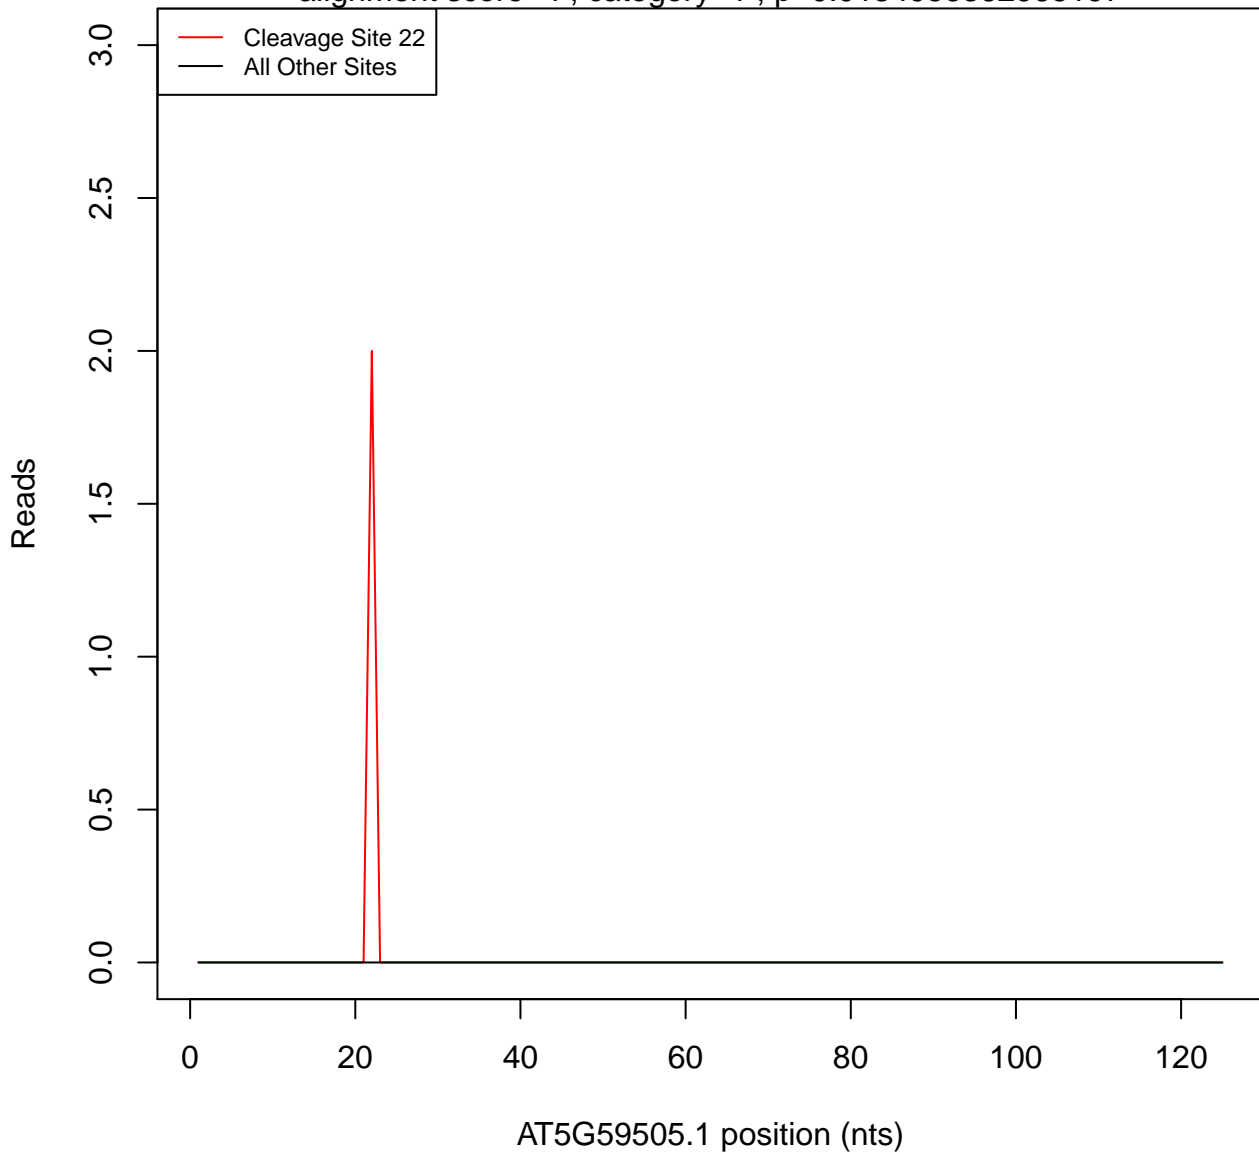

# ath-miR172a slicing AT5G60120.1 at nt 1658

alignment score=1 , category=0 , p=0.00548199277770745

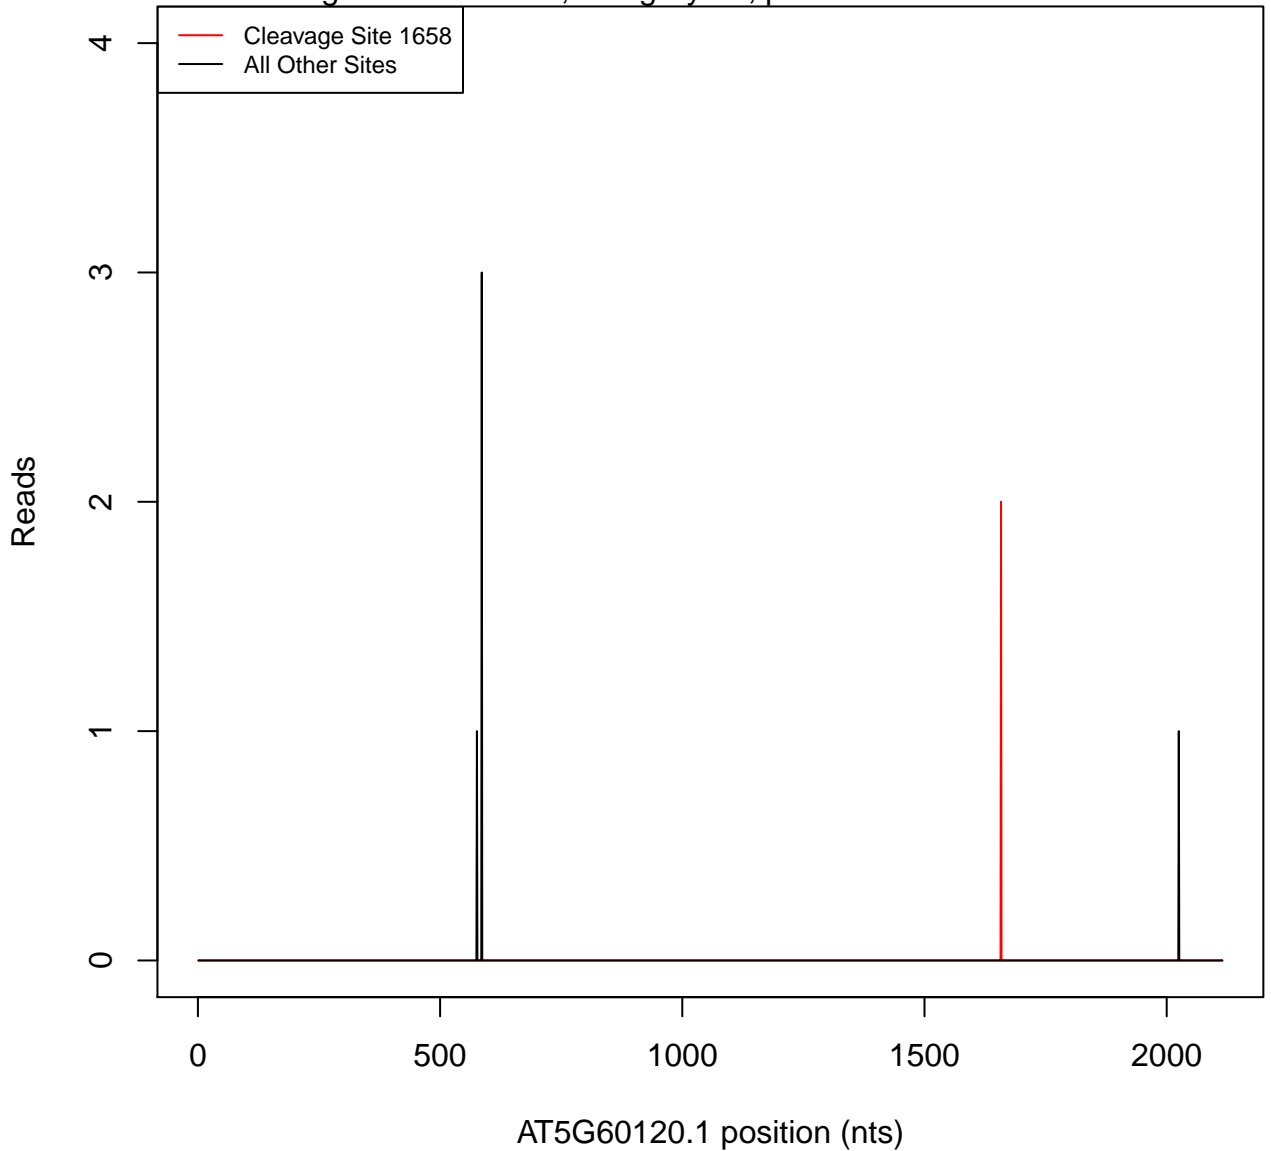

# ath-miR172b slicing AT5G60120.1 at nt 1658

alignment score=1 , category=0 , p=0.00548199277770745

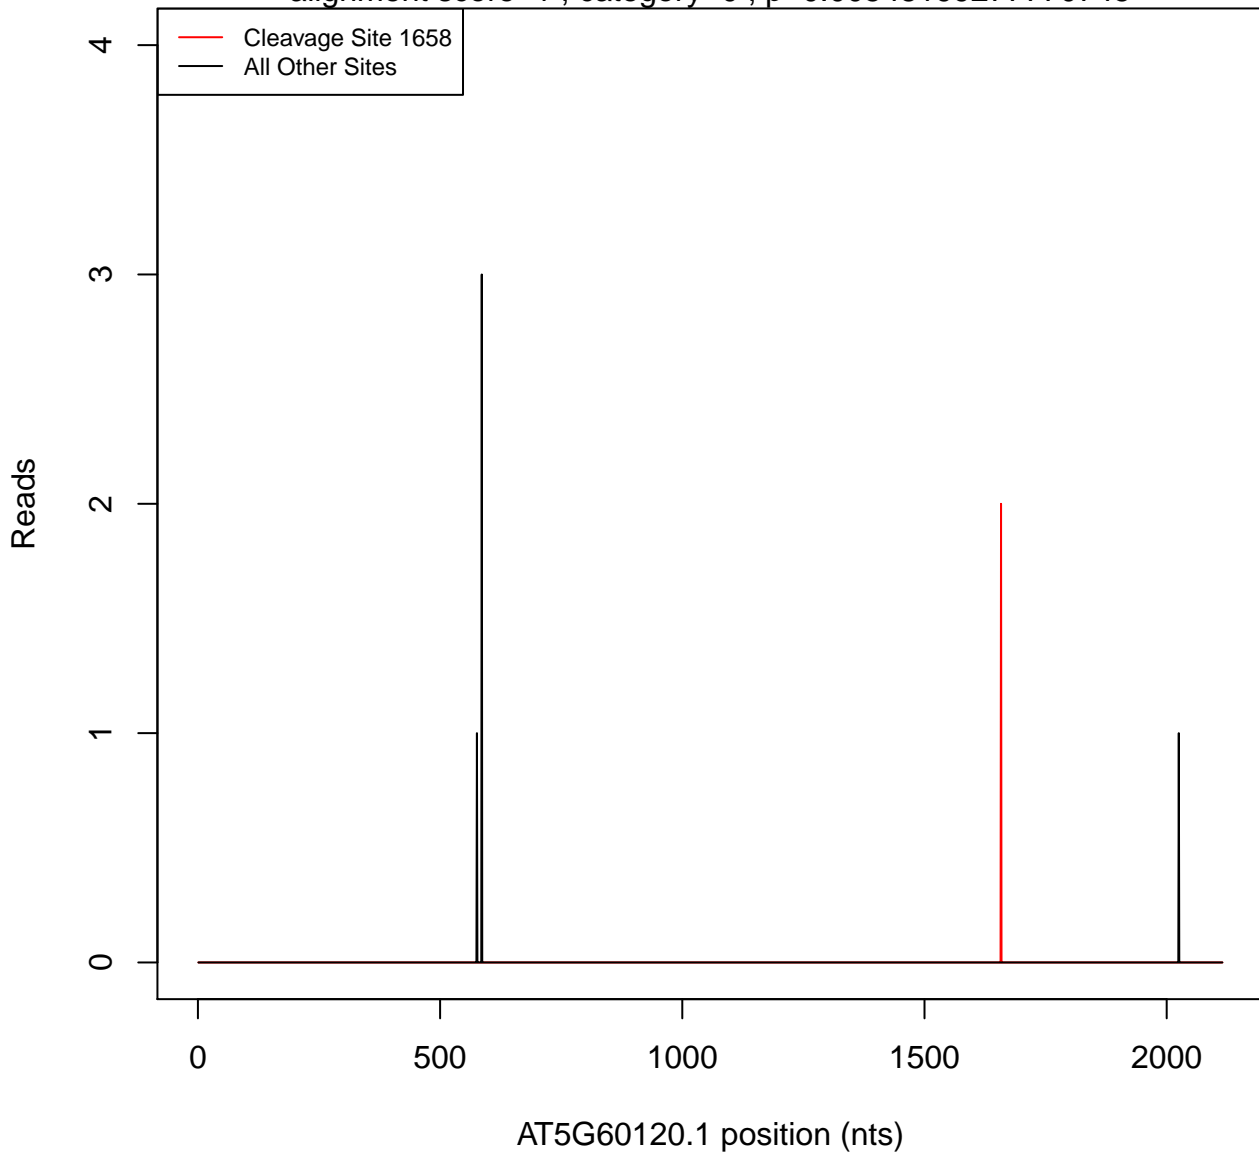

# ath-miR172c slicing AT5G60120.1 at nt 1658

alignment score=2 , category=0 , p=0.0138572036986587

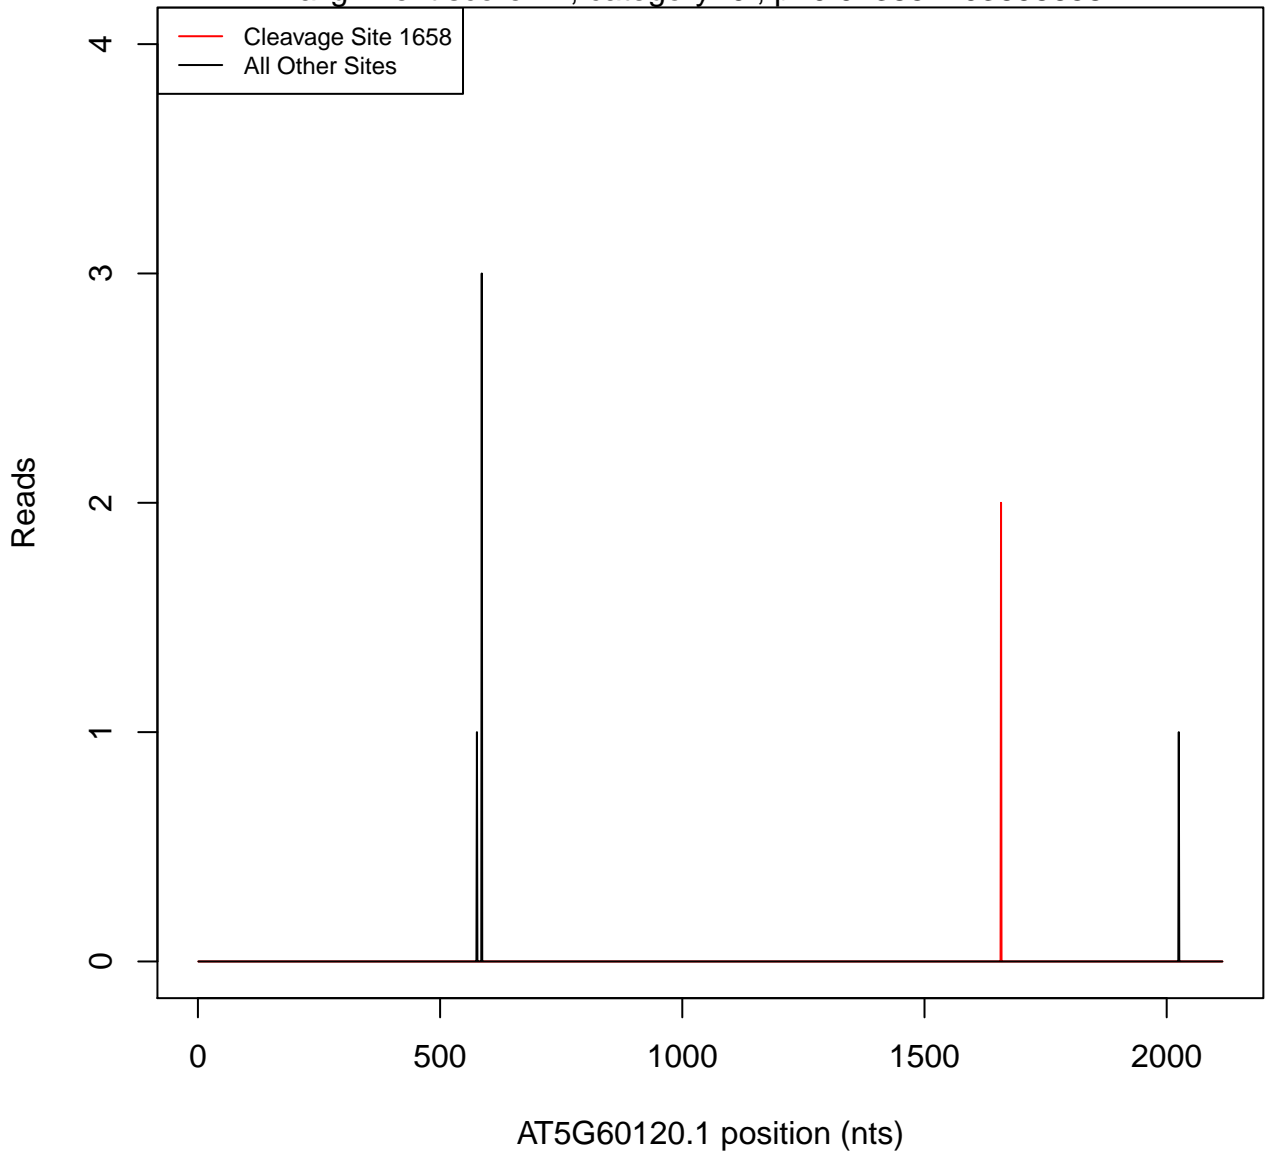

# ath-miR172d slicing AT5G60120.1 at nt 1658

alignment score=2 , category=0 , p=0.0138572036986587

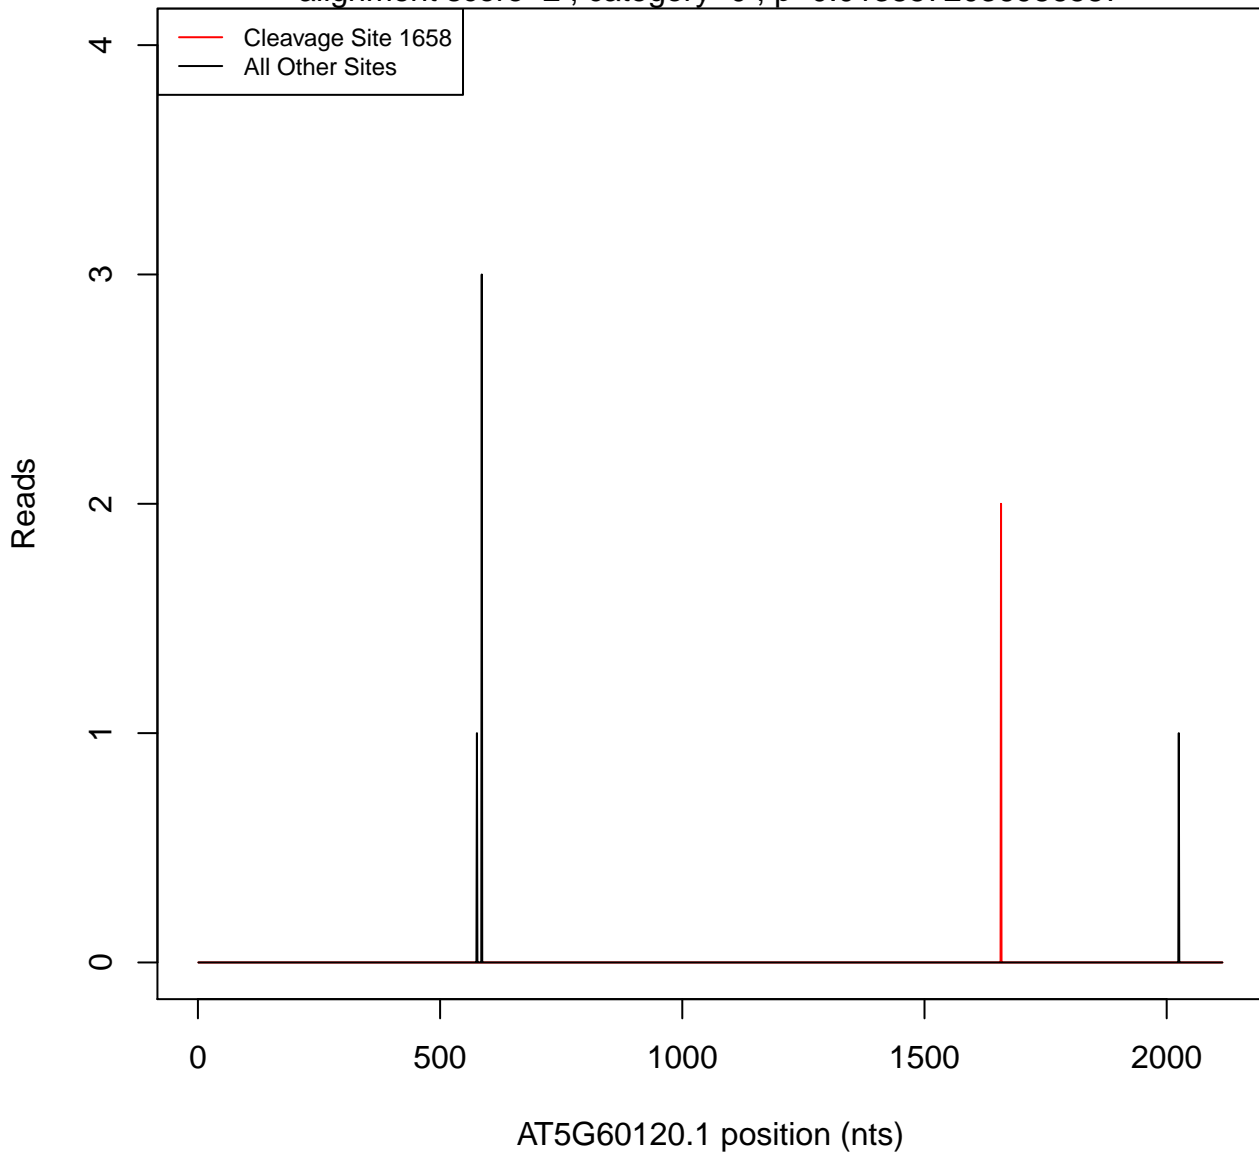

# ath-miR172e slicing AT5G60120.1 at nt 1658

alignment score=1.5 , category=0 , p=0.00506137007480845

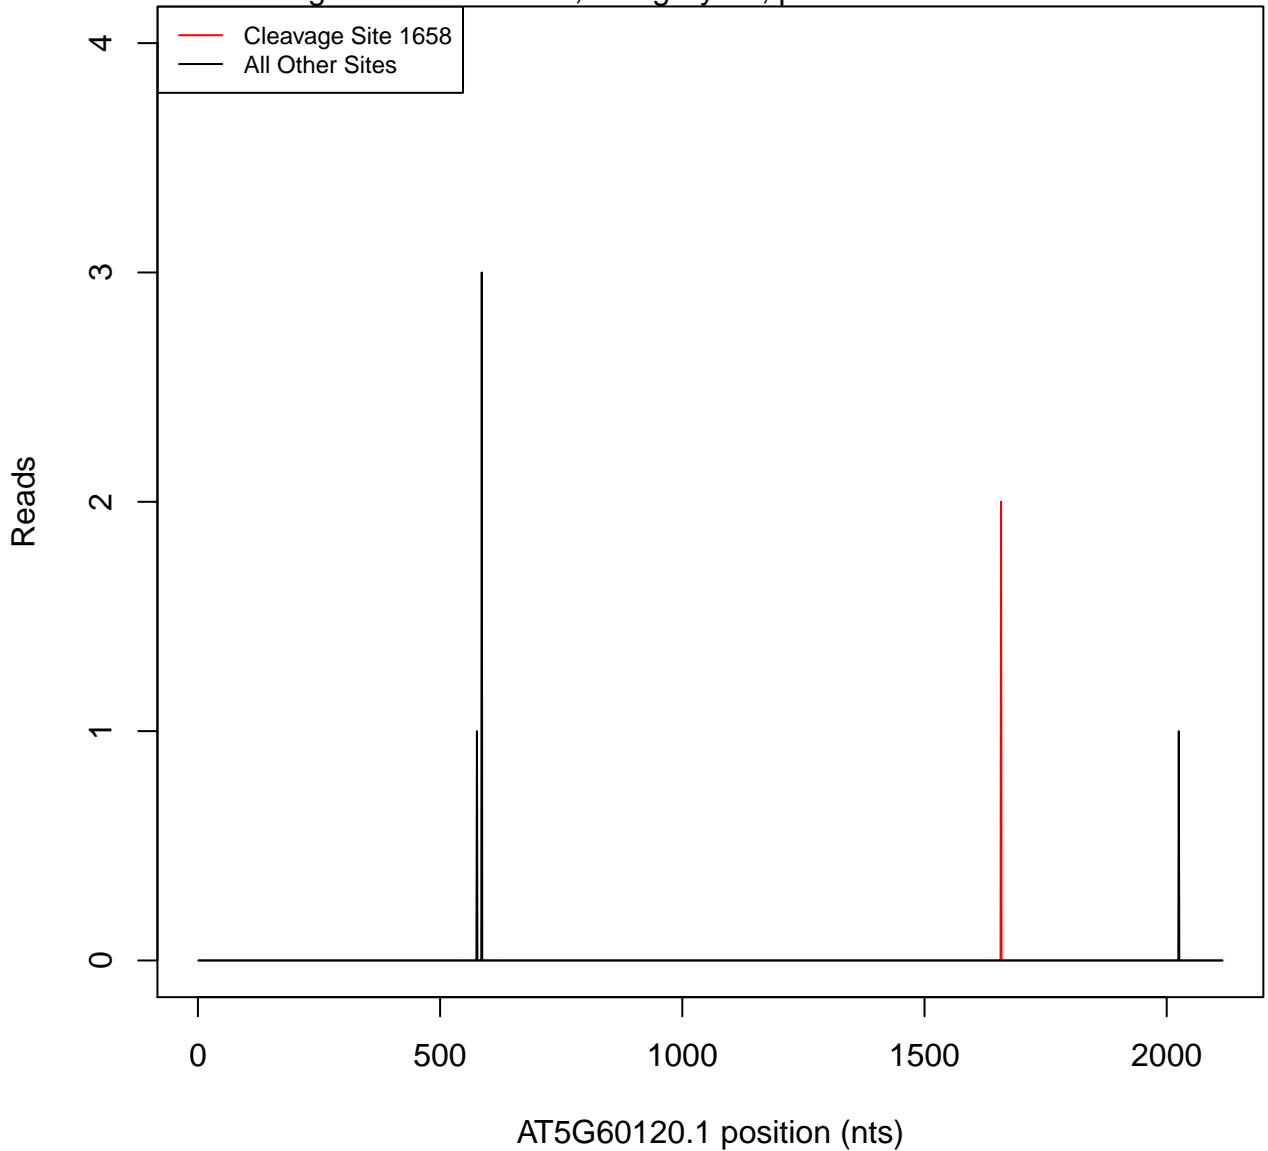

# ath-miR172a slicing AT5G60120.2 at nt 1821

alignment score=1 , category=0 , p=0.00548199277770745

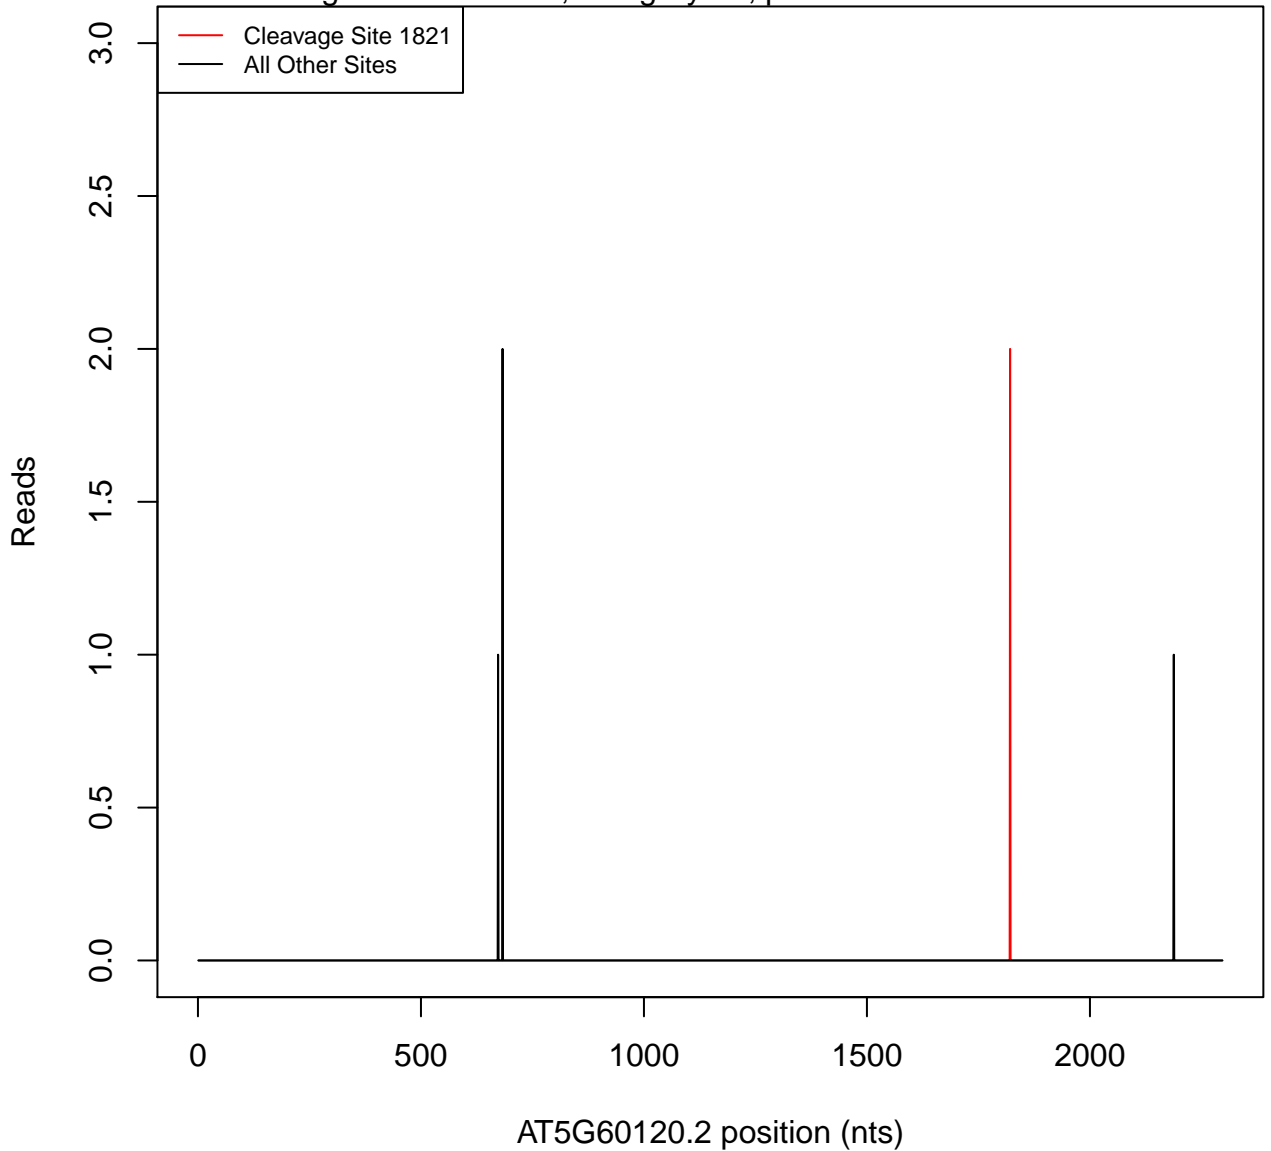



# ath-miR172b slicing AT5G60120.2 at nt 1821

alignment score=1 , category=0 , p=0.00548199277770745

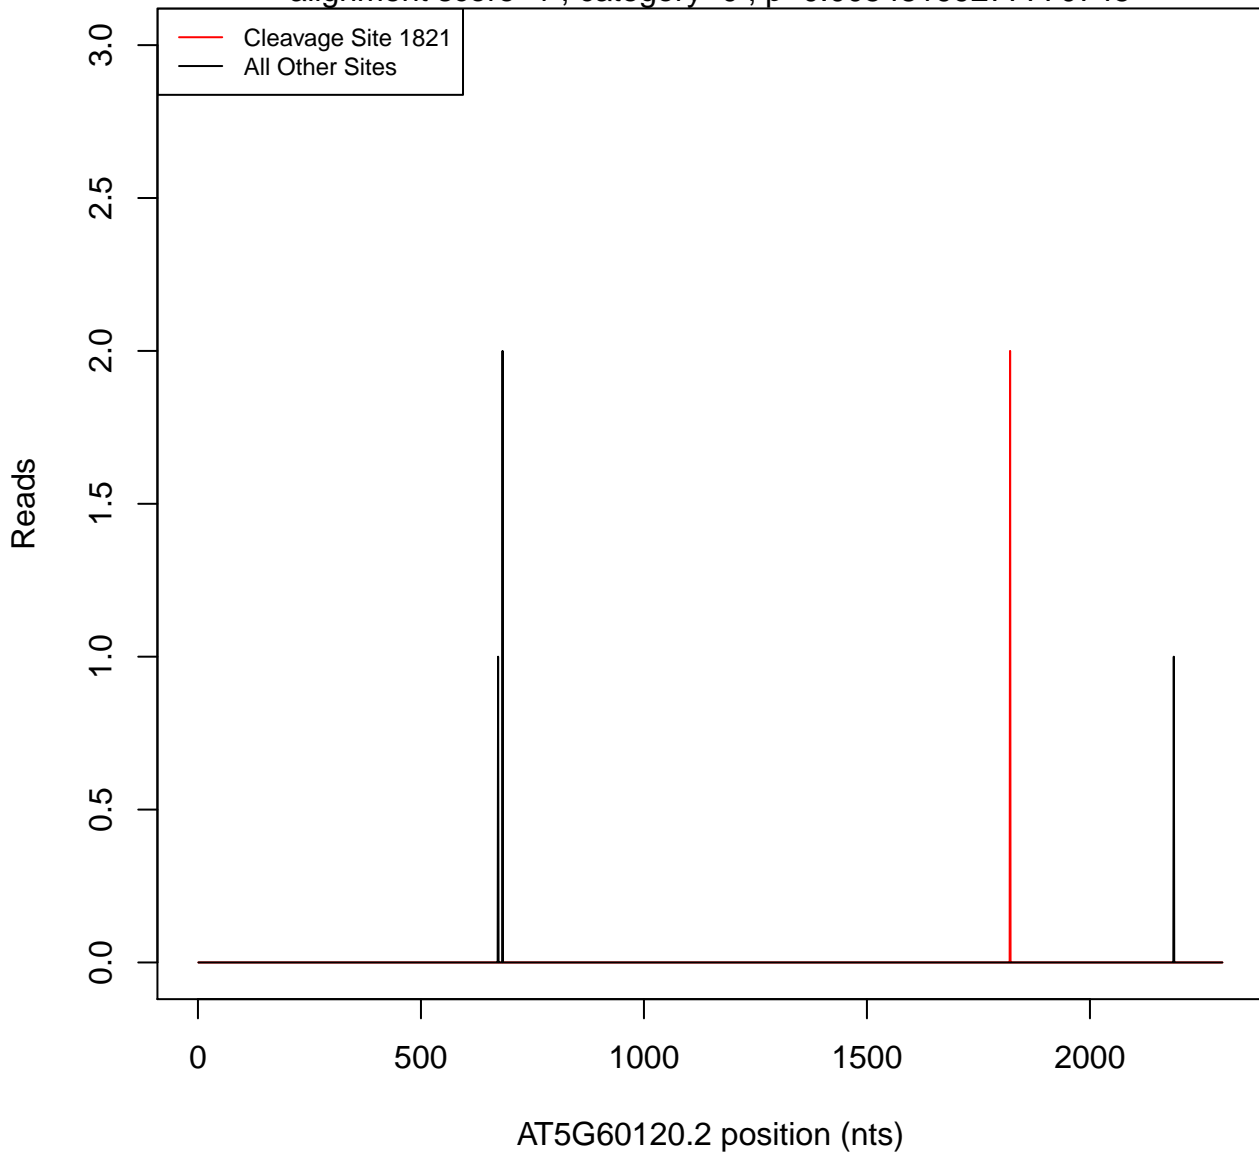

# ath-miR172c slicing AT5G60120.2 at nt 1821

alignment score=2 , category=0 , p=0.0138572036986587

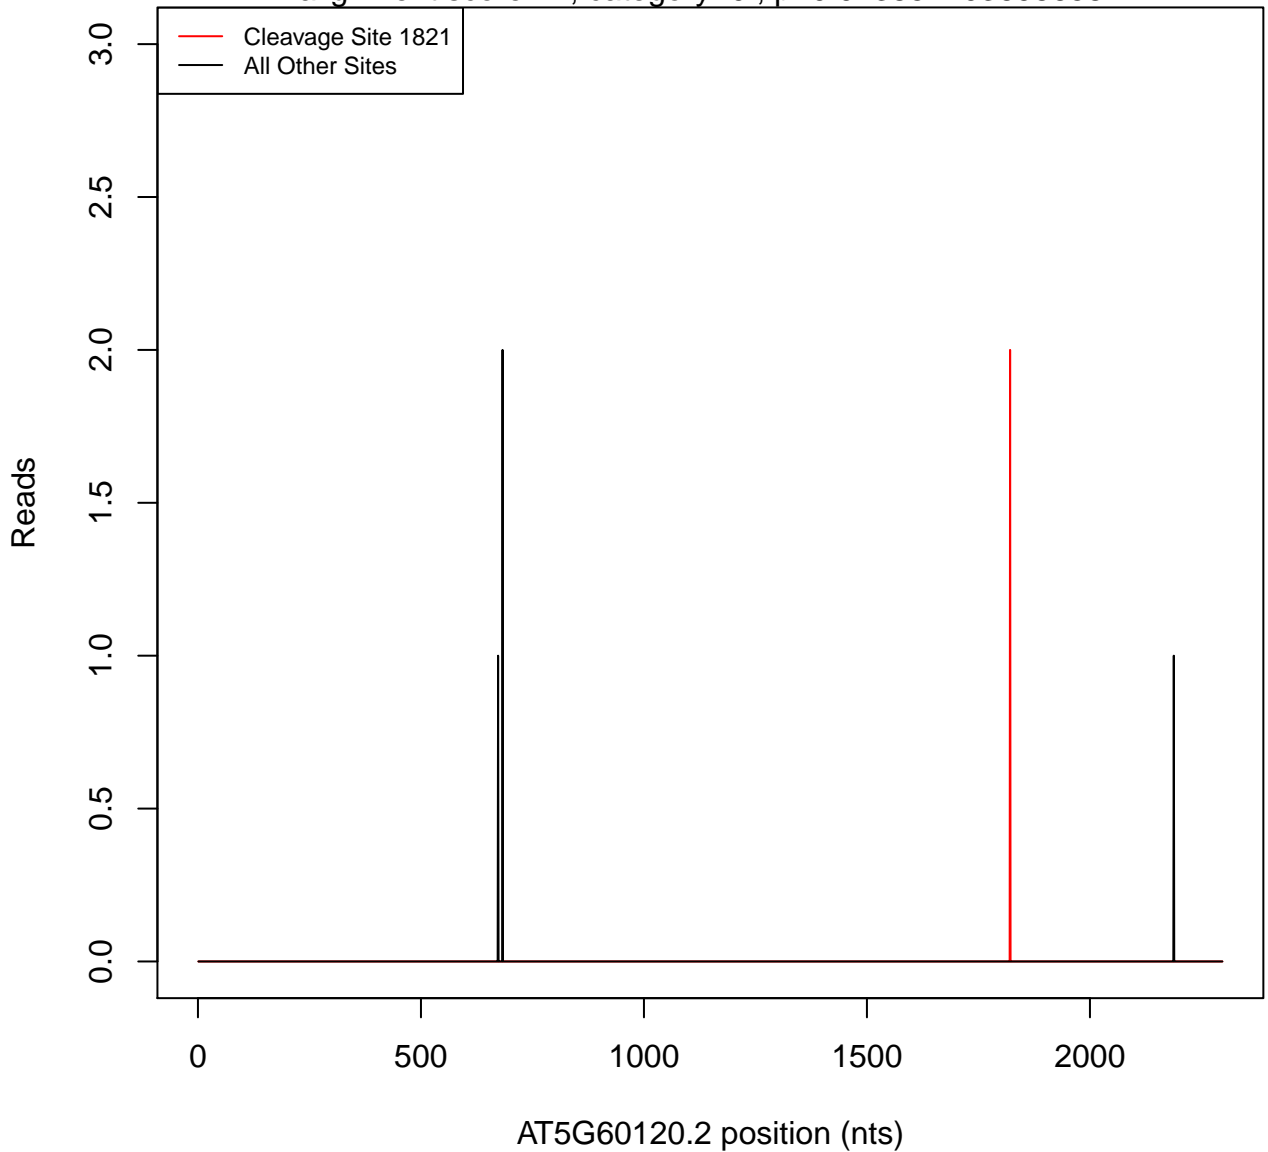

# ath-miR172d slicing AT5G60120.2 at nt 1821

alignment score=2 , category=0 , p=0.0138572036986587

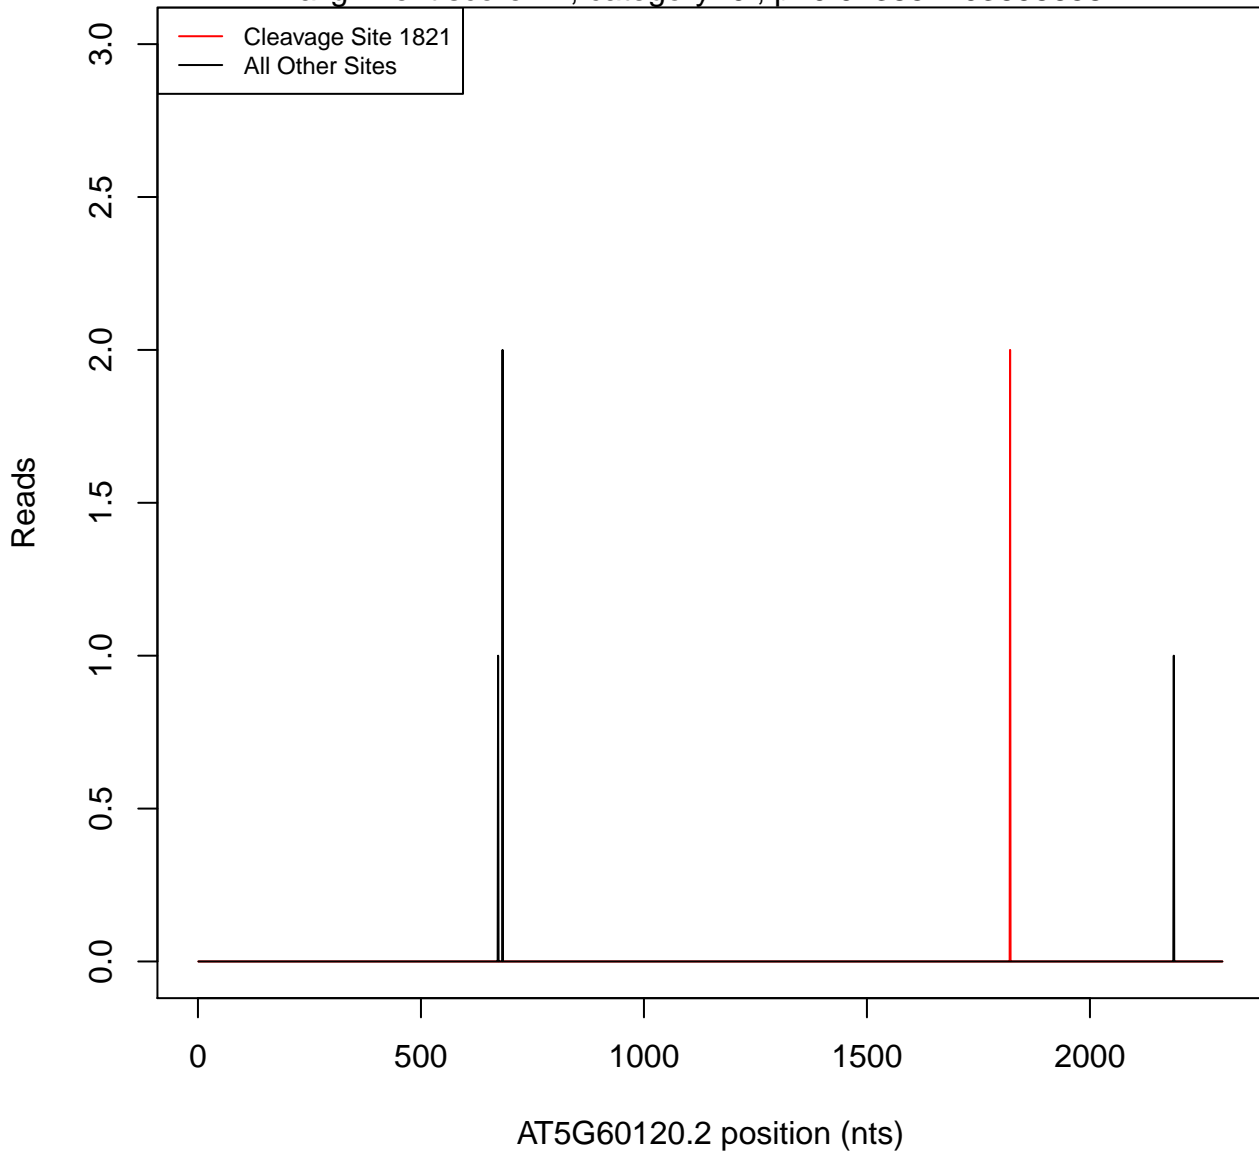

# ath-miR172e slicing AT5G60120.2 at nt 1821

alignment score=1.5 , category=0 , p=0.00506137007480845

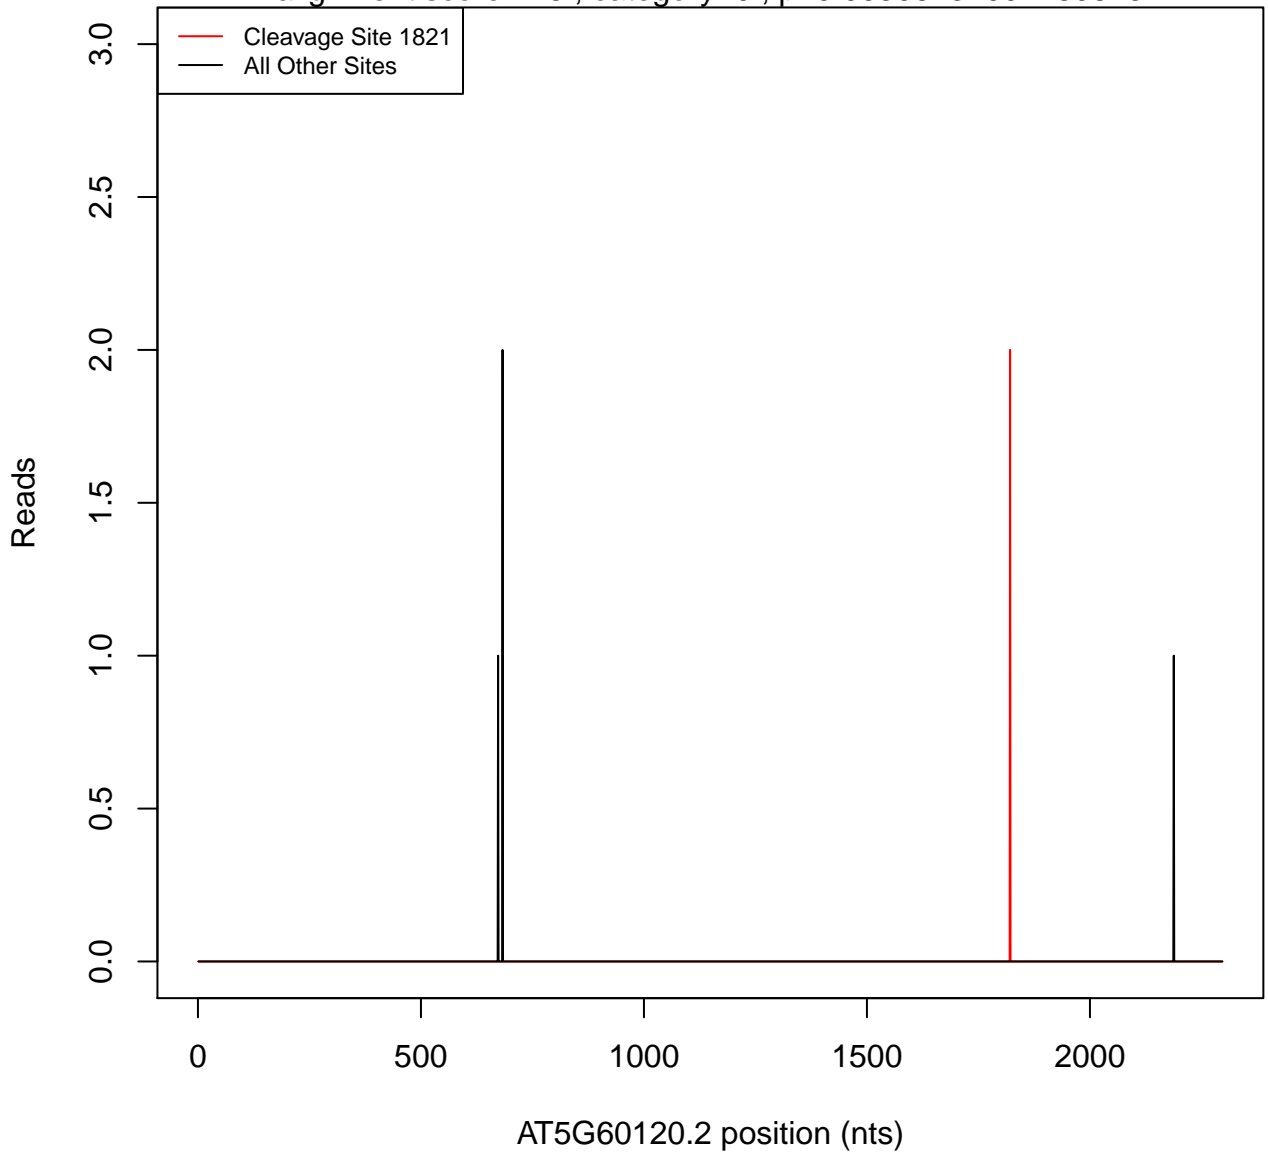

Supplement: 1471-2164-14-9-S4.pdf [file 1471-2164-14-9-S4.pdf]
